# Supplementary material for: Effects of temperature frequency trends on projected japonica rice (Oryza sativa L.) yield and dry matter distribution with elevated carbon dioxide
Source: PeerJ. 2021 Mar 11;9:e11027. doi: 10.7717/peerj.11027 (PMC7956007; doi:10.7717/peerj.11027)
Supplement: Supplemental Information 1 [file peerj-09-11027-s001.xlsx]

## Sheet: Zhongwei
Years	Anthesis day_simulation	Anthesis day_observation	Maturity day_simulation	Maturity day_observation	yield_simulation (kg/ha)	yield_observation (kg/ha)
1997	80	85	123	136	8385	7451
1998	83	84	127	137	10090	10499
1999	83	83	127	132	10051	9750
2000	78	83	129	132	9036	9746
2001	78	82	123	135	9538	10199
2002	78	79	133	129	9439	10199
2003	81	84	130	142	9354	10193

## Sheet: Yongning
Years	Anthesis day_simulation	Anthesis day_observation	Maturity day_simulation	Maturity day_observation	yield_simulation (kg/ha)	yield_observation (kg/ha)
1997	81	79	133	127	8685	10579
1998	86	78	139	126	9535	10260
1999	81	82	130	122	9188	10649
2000	76	81	129	125	8813	8549
2001	77	82	133	129	9004	8699
2003	85	78	137	128	8723	9500
2004	79	83	132	134	8514	8774
2005	69	74	116	123	8883	8999
