# Supplementary material for: Effects of temperature frequency trends on projected japonica rice (Oryza sativa L.) yield and dry matter distribution with elevated carbon dioxide
Source: PeerJ. 2021 Mar 11;9:e11027. doi: 10.7717/peerj.11027 (PMC7956007; doi:10.7717/peerj.11027)
Supplement: Supplemental Information 3 [file peerj-09-11027-s003.xlsx]

## Sheet: RCP 2.6
Zhongwei
MIROC5								IPSL-CM5A-MR								GFDL-ESM2G
Date	solar radiation (MJ/m2)	Tmax (°C)	Tmin (°C)	precipitation (mm)				Date	solar radiation (MJ/m2)	Tmax (°C)	Tmin (°C)	precipitation (mm)				Date	solar radiation (MJ/m2)	Tmax (°C)	Tmin (°C)	precipitation (mm)
2006-01-01	9.61371	-1.30615	-12.5793	0				2006-01-01	9.41162	4.95819	-5.1824	0				2006-01-01	9.49067	-3.60934	-15.7062	0
2006-01-02	9.0322	-0.5961	-11.1095	0				2006-01-02	4.10151	2.6926	-6.77689	0				2006-01-02	10.0247	1.61423	-10.272	0
2006-01-03	9.39402	0.584229	-10.2803	0				2006-01-03	8.38408	6.06622	-9.79053	0.0230587				2006-01-03	10.6045	0.733185	-13.6449	0
2006-01-04	9.86083	0.34906	-10.753	0				2006-01-04	5.0732	-8.56155	-16.7528	0.674561				2006-01-04	10.3094	-7.25656	-16.087	0
2006-01-05	10.0293	0.193848	-11.2531	0				2006-01-05	9.85525	-10.2302	-20.2235	0.0226257				2006-01-05	10.353	-2.65518	-14.3829	0
2006-01-06	10.2014	0.820435	-10.7616	0				2006-01-06	10.1591	-5.88852	-18.3906	0				2006-01-06	8.06459	1.05881	-11.4342	0
2006-01-07	10.1462	2.8685	-10.4618	0				2006-01-07	10.2604	-3.05249	-13.3831	0				2006-01-07	10.3139	2.96463	-9.6409	0
2006-01-08	10.4121	4.43759	-8.92239	0				2006-01-08	10.5407	-0.0853577	-11.2771	0				2006-01-08	9.39064	2.23407	-8.6221	0.00867104
2006-01-09	10.024	4.36984	-8.70709	0				2006-01-09	9.8437	0.148743	-11.2911	0				2006-01-09	6.62455	1.10477	-9.71701	0.0466521
2006-01-10	9.23478	4.26736	-8.94461	0				2006-01-10	10.2051	3.10983	-9.14597	0				2006-01-10	7.16372	-0.243957	-9.9819	0.0134798
2006-01-11	7.75746	1.35715	-7.95465	0.0139811				2006-01-11	9.89895	6.12375	-7.15308	0				2006-01-11	9.84145	1.72382	-9.72885	0
2006-01-12	6.58797	0.935547	-8.58856	0.0217984				2006-01-12	10.3081	3.87222	-6.94281	0				2006-01-12	10.5156	3.4841	-8.2128	0
2006-01-13	10.4124	5.27994	-7.83164	0				2006-01-13	9.61252	-0.435394	-9.81061	0.209795				2006-01-13	7.15985	-0.0471191	-8.02972	0.105213
2006-01-14	8.74143	2.84741	-7.57065	0				2006-01-14	7.64656	-2.6864	-11.8996	0.0919265				2006-01-14	6.09053	-2.60522	-11.1738	0.0993223
2006-01-15	4.66053	-3.08237	-11.7433	0.0848245				2006-01-15	9.99657	0.844391	-11.7292	0				2006-01-15	6.73398	-3.73996	-12.5685	0
2006-01-16	10.5267	-4.68527	-12.3013	0				2006-01-16	7.39761	-5.57437	-15.0307	0.0907402				2006-01-16	11.2215	0.0689392	-13.223	0
2006-01-17	6.51826	-0.0871277	-8.10275	0				2006-01-17	10.9918	0.846497	-14.3365	0				2006-01-17	11.4889	5.17346	-9.19098	0
2006-01-18	11.0392	2.61346	-7.04407	0				2006-01-18	10.3224	9.0043	-8.72299	0				2006-01-18	10.9295	-4.86002	-15.4029	0
2006-01-19	9.51383	5.46887	-8.36255	1.17748				2006-01-19	10.9208	-3.87027	-17.1129	0.00261381				2006-01-19	11.128	-1.65125	-15.6222	0
2006-01-20	8.38557	-6.457	-16.8826	1.13041				2006-01-20	9.32712	-6.49985	-21.7443	0.0912965				2006-01-20	11.113	0.0151062	-9.36056	0
2006-01-21	10.4799	-6.52124	-17.4992	0				2006-01-21	10.3636	-9.6618	-20.5373	0				2006-01-21	11.2498	0.997375	-10.0008	0
2006-01-22	11.4016	-4.32156	-15.528	0				2006-01-22	10.0408	-6.07947	-19.4304	0				2006-01-22	11.5302	2.90833	-10.2677	0
2006-01-23	11.0469	-1.58978	-14.5396	0				2006-01-23	10.8391	-0.509155	-15.1555	0				2006-01-23	10.7921	-0.22467	-9.87628	0
2006-01-24	11.9867	-0.425446	-12.3742	0				2006-01-24	7.25381	-1.24612	-12.6074	0				2006-01-24	11.8468	4.67432	-6.46078	0
2006-01-25	8.3439	1.33383	-11.4021	0.0846178				2006-01-25	8.36836	-3.06122	-15.4796	0.00926555				2006-01-25	11.827	2.4407	-7.83652	0
2006-01-26	10.6246	2.03812	-11.1218	0				2006-01-26	11.386	-6.17844	-18.436	0				2006-01-26	12.2824	7.33179	-7.14368	0
2006-01-27	9.54924	3.79193	-10.1774	0				2006-01-27	11.8294	-3.48633	-16.2443	0				2006-01-27	10.9557	5.68384	-5.28378	0
2006-01-28	11.9859	6.52438	-6.68875	0				2006-01-28	11.0781	1.50128	-12.0044	0.00865322				2006-01-28	3.85739	-0.0762024	-10.0633	0
2006-01-29	8.16174	4.22058	-11.8438	0.547507				2006-01-29	11.0501	6.23367	-8.24518	0				2006-01-29	7.13178	-2.14249	-13.2996	0
2006-01-30	12.102	-7.51981	-13.1076	0				2006-01-30	7.11586	-1.92349	-10.4461	0.120429				2006-01-30	8.83658	1.19174	-11.9284	0
2006-01-31	12.4857	2.73721	-13.9373	0				2006-01-31	10.0203	-2.88989	-14.2984	0				2006-01-31	12.3374	5.38126	-4.00629	0
2006-02-01	12.7888	2.18268	-12.0606	0				2006-02-01	10.4589	-0.828583	-13.1297	0.172501				2006-02-01	10.5371	6.69699	-3.78635	0.169938
2006-02-02	12.7049	-0.0659485	-10.4464	0				2006-02-02	5.59902	-3.63452	-13.8044	0.494989				2006-02-02	10.1826	4.95694	-5.36655	0
2006-02-03	13.0434	2.08746	-10.9261	0				2006-02-03	5.71388	-6.62329	-17.4067	0.0395172				2006-02-03	12.7485	11.1916	-1.53976	0
2006-02-04	13.8713	7.38614	-10.6322	0				2006-02-04	11.4495	-4.44531	-14.5733	0.148737				2006-02-04	12.2146	12.6178	-2.50156	0
2006-02-05	13.0301	8.88422	-5.02048	0				2006-02-05	11.8811	-6.35751	-15.5953	0.0221882				2006-02-05	11.8894	7.62118	-4.55563	0
2006-02-06	10.7899	4.63022	-5.13757	0				2006-02-06	13.6832	-2.77664	-14.1148	0				2006-02-06	10.4918	10.7817	-2.89383	0
2006-02-07	13.1339	6.25244	-5.65448	0				2006-02-07	13.7274	2.54806	-10.4346	0				2006-02-07	7.22252	1.26859	-10.2712	0.16632
2006-02-08	13.1555	8.54218	-2.79175	0				2006-02-08	13.3206	0.0444641	-9.23871	0				2006-02-08	10.2305	-4.91507	-15.2234	0.0109289
2006-02-09	10.4923	7.77679	-2.61716	0				2006-02-09	13.6885	5.6525	-7.65064	0				2006-02-09	12.7774	-1.05606	-12.0986	0.0067497
2006-02-10	13.2856	9.98212	-1.99109	0				2006-02-10	13.5184	10.2236	-5.49368	0				2006-02-10	14.5272	-1.94574	-13.8496	0
2006-02-11	12.7658	8.36545	-1.78036	0.00511385				2006-02-11	14.054	11.6006	-3.52945	0				2006-02-11	14.6288	-1.41699	-15.4511	0
2006-02-12	12.496	9.73422	-1.6889	0				2006-02-12	13.3523	10.1842	-3.17776	0				2006-02-12	14.6985	1.07449	-12.7886	0
2006-02-13	13.5907	9.81104	-0.864319	0				2006-02-13	2.10715	5.82217	-5.16794	2.86503				2006-02-13	14.6079	3.53751	-8.62366	0
2006-02-14	10.5746	8.22846	-0.749481	0.0330049				2006-02-14	12.013	6.47617	-3.81024	0				2006-02-14	14.9097	5.65829	-5.80667	0
2006-02-15	9.8997	7.05896	-1.23532	0.00927325				2006-02-15	14.1359	7.67169	-4.05881	0				2006-02-15	14.8038	4.77148	-5.61542	0
2006-02-16	11.5564	7.59387	-1.72055	0.0277199				2006-02-16	12.4091	10.7665	-10.3271	0.531052				2006-02-16	14.9282	5.62399	-3.30447	0
2006-02-17	10.5826	9.34857	-0.827667	0				2006-02-17	14.7205	-4.97708	-14.8175	0.0152975				2006-02-17	6.00352	2.39185	-5.40463	0.273846
2006-02-18	12.0594	10.0881	-1.47083	0				2006-02-18	15.0725	-5.84534	-17.0576	0				2006-02-18	15.7836	8.53671	-3.81784	0
2006-02-19	12.4007	13.7695	-0.282593	0.0137128				2006-02-19	13.5161	-5.55771	-16.9663	0				2006-02-19	12.9386	4.14032	-8.08566	0.0423361
2006-02-20	3.46473	6.10703	-1.04791	0.155588				2006-02-20	16.3615	-1.22559	-15.439	0				2006-02-20	15.8892	2.42603	-9.26306	0
2006-02-21	10.4981	8.06805	-1.44678	0.0790106				2006-02-21	15.7791	-0.0214233	-10.3734	0				2006-02-21	14.8868	3.95807	-5.46158	0.0166797
2006-02-22	15.2344	15.3795	-0.799164	0				2006-02-22	15.7638	6.98227	-7.70801	0				2006-02-22	10.9097	1.62796	-7.4169	0.0443672
2006-02-23	10.1085	8.31287	-2.34427	0				2006-02-23	15.5371	7.72516	-5.24353	0				2006-02-23	12.0397	0.846314	-7.26627	0.107054
2006-02-24	5.63064	3.41138	-1.47064	3.45967				2006-02-24	13.2877	7.59268	-3.78458	0				2006-02-24	10.3154	2.56528	-9.21011	0.0672841
2006-02-25	8.55391	3.737	-3.12796	0.32235				2006-02-25	15.7524	8.34952	-4.57486	0				2006-02-25	16.7109	7.63852	-3.65665	0
2006-02-26	9.277	1.39517	-4.9498	0.301701				2006-02-26	16.2392	10.6175	-4.92953	0				2006-02-26	15.9276	4.56509	-10.4932	0.0175159
2006-02-27	3.24234	0.677246	-3.06149	0.184792				2006-02-27	16.932	14.5862	0.586334	0				2006-02-27	17.4395	-1.26718	-12.7578	0
2006-02-28	16.7923	3.2395	-5.57718	0.010705				2006-02-28	16.9192	10.8241	0.575409	0.188484				2006-02-28	18.033	-3.57303	-14.6521	0
2006-03-01	18.0714	5.05063	-5.60419	0.0158594				2006-03-01	9.8604	5.44022	-3.93961	0.120703				2006-03-01	18.8421	2.57202	-12.1895	0
2006-03-02	12.1903	3.79196	-3.6712	1.63487				2006-03-02	7.33634	4.25601	-5.54324	0.717804				2006-03-02	18.8145	6.20624	-7.58914	0
2006-03-03	10.2375	3.4415	-4.21256	0.0609767				2006-03-03	16.8977	7.93365	-5.35764	0.0231221				2006-03-03	18.95	11.825	1.82321	0
2006-03-04	14.1722	4.82718	-6.8172	0.113939				2006-03-04	17.2572	10.0415	-3.19336	0				2006-03-04	15.7894	9.00177	-6.04025	0.0315122
2006-03-05	20.0805	3.49554	-8.42761	0				2006-03-05	18.1841	13.4507	-2.83121	0				2006-03-05	15.5957	1.58594	-11.3103	0.0290745
2006-03-06	19.2753	11.2783	-3.18964	0				2006-03-06	17.693	12.6311	-3.30637	0.0246098				2006-03-06	16.8064	1.16507	-12.1767	0
2006-03-07	12.7916	8.76794	-1.54767	0.0377425				2006-03-07	18.8484	1.50046	-10.2672	0.0187787				2006-03-07	19.423	3.82803	-10.4525	0.0225962
2006-03-08	18.9487	13.5017	-2.56851	0				2006-03-08	19.5153	2.73459	-8.76218	0				2006-03-08	17.59	-0.689728	-11.2957	0
2006-03-09	19.8214	16.8752	-0.369843	0				2006-03-09	19.675	5.63095	-5.93131	0				2006-03-09	20.9771	7.94937	-4.6333	0
2006-03-10	17.4305	15.0809	0.505279	0.443879				2006-03-10	19.2681	9.99347	-2.95813	0				2006-03-10	19.0527	9.43399	-0.877869	0
2006-03-11	11.4641	8.81314	1.01883	0.159953				2006-03-11	18.0838	12.8995	-4.01999	0				2006-03-11	19.9	12.7282	0.791717	0
2006-03-12	18.826	15.666	0.948547	0.00283944				2006-03-12	18.0461	12.8037	-4.69751	0				2006-03-12	18.8313	13.6378	-3.20178	0.109899
2006-03-13	15.9391	15.7057	2.46567	0.0343044				2006-03-13	7.03003	6.9743	-2.57083	0.0764847				2006-03-13	19.7003	6.84726	-5.19778	0.00809554
2006-03-14	18.4056	16.7585	3.00287	0.0107009				2006-03-14	6.10733	6.79904	-2.13559	0.0883126				2006-03-14	13.5682	15.5611	4.42636	0.0160078
2006-03-15	20.4174	17.9347	6.39142	0				2006-03-15	17.1552	9.13495	-3.68777	0.0877415				2006-03-15	7.62292	8.60895	-1.37573	0.0761437
2006-03-16	20.1381	19.7618	4.8183	0				2006-03-16	20.5948	9.28491	-4.23022	0				2006-03-16	16.1311	7.45966	-3.41956	0.0318891
2006-03-17	19.5223	21.7687	6.58902	0				2006-03-17	20.3151	13.17	-1.4512	0				2006-03-17	15.6078	11.4467	1.28153	0
2006-03-18	18.7465	25.8933	8.88534	0.198491				2006-03-18	20.3863	13.7793	2.62778	0				2006-03-18	19.4796	21.6185	7.02551	0
2006-03-19	18.5073	18.3528	7.43991	0.00401138				2006-03-19	11.6484	13.3079	0.930939	0.0720592				2006-03-19	18.6207	15.5698	3.78189	0.0423292
2006-03-20	16.7979	17.6868	6.04541	0.796381				2006-03-20	18.7076	12.7745	-0.321014	0.0686849				2006-03-20	19.9075	15.9836	0.369751	0
2006-03-21	5.11562	9.18109	0.919708	2.68856				2006-03-21	20.8517	14.5649	2.68918	0				2006-03-21	21.6954	11.5644	-0.36795	0
2006-03-22	3.72764	1.98639	-1.35889	1.6372				2006-03-22	14.8468	19.2702	6.0318	0.0138123				2006-03-22	16.848	10.8128	1.03275	0.0206578
2006-03-23	17.2953	6.18784	-0.574036	0.0187177				2006-03-23	18.6793	15.5638	4.29971	0.438314				2006-03-23	17.5181	12.471	1.79303	0.0223107
2006-03-24	21.166	7.25516	-3.99872	0				2006-03-24	13.6981	10.9747	1.048	0.0268493				2006-03-24	20.668	12.7546	-1.83667	0
2006-03-25	24.1923	12.6225	-4.13754	0				2006-03-25	21.0206	14.8585	0.410004	0				2006-03-25	22.3098	9.34827	-2.9769	0.0154849
2006-03-26	22.9937	16.698	2.15387	0.0310157				2006-03-26	22.095	17.8551	3.0614	0				2006-03-26	23.1762	12.639	-1.07779	0
2006-03-27	21.2591	17.1615	6.13864	0				2006-03-27	20.766	18.6037	5.76901	0				2006-03-27	22.9864	15.7401	3.66501	0
2006-03-28	22.9247	24.1731	5.70499	0				2006-03-28	19.8108	22.9251	7.06473	0				2006-03-28	23.2714	18.4494	5.35263	0
2006-03-29	11.9073	8.71301	1.81876	0				2006-03-29	21.9386	22.6216	4.92807	0.0794838				2006-03-29	22.8714	19.7804	7.69043	0
2006-03-30	18.374	14.1094	1.03583	0				2006-03-30	7.9593	6.54102	0.0197754	0.713421				2006-03-30	23.4923	19.4552	1.82153	0
2006-03-31	16.1825	15.4482	3.73917	0				2006-03-31	19.4808	14.4275	2.2749	0				2006-03-31	22.6383	13.9107	2.25598	0
2006-04-01	21.0025	17.5835	6.51581	0.215582				2006-04-01	23.7456	14.8039	0.564331	0				2006-04-01	19.0812	17.3434	6.12439	0
2006-04-02	18.8276	15.1405	2.94742	0.0435849				2006-04-02	17.7549	11.853	2.31393	0.719677				2006-04-02	23.9155	18.4309	7.63052	0
2006-04-03	17.7706	13.809	2.65762	0.14409				2006-04-03	19.7123	17.0452	2.7413	0.167091				2006-04-03	24.2967	21.8069	1.46631	0.0751514
2006-04-04	17.2496	16.8247	5.99057	0.474318				2006-04-04	22.4439	16.8817	3.13544	0.0470184				2006-04-04	10.8165	3.66226	-4.19043	0.633633
2006-04-05	12.9738	14.5909	3.79745	0.0767183				2006-04-05	23.902	14.5325	3.16065	0				2006-04-05	14.4841	4.77039	-3.09085	0.118552
2006-04-06	24.946	17.9952	4.09125	0				2006-04-06	23.0037	21.344	8.34341	0				2006-04-06	24.2755	11.1291	-0.166473	0
2006-04-07	24.2264	19.4855	4.69928	0				2006-04-07	19.398	21.8782	8.83548	0				2006-04-07	23.6005	22.1779	6.64841	0
2006-04-08	23.5797	23.6405	8.86496	0.0155364				2006-04-08	5.35663	12.6053	-4.34229	3.94116				2006-04-08	23.2626	19.4911	6.31906	0
2006-04-09	21.6494	21.3735	11.6363	0.0678413				2006-04-09	24.7225	2.58972	-6.05435	0				2006-04-09	25.5303	19.8203	5.92267	0
2006-04-10	5.71676	14.631	7.83725	0.393543				2006-04-10	23.9669	11.0155	0.484253	0				2006-04-10	24.3801	20.3993	9.82117	0
2006-04-11	23.7662	16.2967	7.19733	0				2006-04-11	8.60724	7.14294	1.69421	1.70441				2006-04-11	19.9589	23.4389	12.1692	0
2006-04-12	20.6766	18.4115	7.92053	0.523994				2006-04-12	14.4365	10.7124	-1.59665	0.79857				2006-04-12	22.9599	19.4679	4.42331	0
2006-04-13	25.281	22.9176	9.15582	0.0098801				2006-04-13	23.3308	14.4823	4.94663	0.0173738				2006-04-13	24.3296	13.7303	2.2316	0
2006-04-14	23.2714	25.6464	12.9178	0.392224				2006-04-14	21.7162	18.2583	4.22006	0.0325233				2006-04-14	24.2855	17.5727	4.73196	0.0566361
2006-04-15	12.4154	19.4501	9.74283	4.77753				2006-04-15	25.6131	20.7501	5.87393	14.3325				2006-04-15	8.31014	12.2551	3.49954	0.910194
2006-04-16	7.8155	13.3462	8.53378	5.94678				2006-04-16	25.9964	23.0583	9.54138	0				2006-04-16	23.4445	18.5504	5.38767	0
2006-04-17	9.95149	14.255	6.42831	0.0338628				2006-04-17	23.9189	23.3156	8.20438	0.0551553				2006-04-17	24.3872	24.1822	11.3944	0
2006-04-18	26.0578	21.4189	7.80997	0				2006-04-18	24.0008	22.3074	10.0196	0				2006-04-18	24.3799	29.691	14.6223	0
2006-04-19	24.9446	22.8778	9.77908	0				2006-04-19	20.7695	22.4736	8.62149	0.246916				2006-04-19	21.2146	22.6328	12.8897	0.535977
2006-04-20	23.9076	24.3997	13.4491	0				2006-04-20	21.8898	10.952	5.85309	0.0363534				2006-04-20	20.4114	21.9031	10.8659	0.0570722
2006-04-21	23.7946	22.5623	9.87726	0.512196				2006-04-21	25.6527	17.7826	2.1247	0.0749981				2006-04-21	14.5607	18.2118	9.97656	0.310237
2006-04-22	10.9001	8.74646	2.56479	0.27975				2006-04-22	25.7127	10.2581	-0.360352	0				2006-04-22	25.4338	24.4928	11.829	0
2006-04-23	24.9188	10.2547	2.76761	0				2006-04-23	26.0156	8.58328	1.2648	0				2006-04-23	18.9081	22.645	12.9846	1.08651
2006-04-24	24.5483	15.6927	5.41556	0.0771677				2006-04-24	26.5184	14.1491	5.60638	0				2006-04-24	15.2705	18.4041	9.86655	0.12189
2006-04-25	21.9578	15.2869	6.37012	0.0190015				2006-04-25	27.6954	21.7905	8.18881	0				2006-04-25	17.1996	16.793	7.20978	0
2006-04-26	22.3281	20.0682	8.1803	0.257882				2006-04-26	18.4889	19.2143	9.97305	0				2006-04-26	27.1156	22.3705	11.1657	0
2006-04-27	26.0369	17.9138	5.77185	0				2006-04-27	22.7752	22.4004	10.6639	0.0257253				2006-04-27	25.3705	26.344	15.0086	0.179252
2006-04-28	27.9422	17.6942	6.32712	0				2006-04-28	23.7991	21.2564	8.66174	0.184866				2006-04-28	13.564	18.1919	12.4131	15.2035
2006-04-29	23.2952	24.3781	9.98291	0.154732				2006-04-29	22.9903	17.8976	7.43655	0.0618293				2006-04-29	17.0038	17.017	10.2611	0.129016
2006-04-30	14.8176	15.9051	8.20163	0.225885				2006-04-30	27.4703	19.2075	8.71374	0				2006-04-30	25.6621	20.4492	11.32	0.124392
2006-05-01	25.3374	17.1341	7.73169	0				2006-05-01	26.0035	27.2276	13.1836	0				2006-05-01	27.2312	28.3869	16.3809	0
2006-05-02	26.2557	20.4405	8.38953	0				2006-05-02	17.8103	21.9812	9.27698	0.0370893				2006-05-02	26.5734	31.8202	17.9843	0.0824231
2006-05-03	27.904	24.6404	12.6459	0				2006-05-03	18.1211	25.2436	12.189	0.421564				2006-05-03	26.0803	29.5576	18.9275	0.148888
2006-05-04	27.2027	25.526	14.2502	0				2006-05-04	21.8246	15.532	3.66342	0.878494				2006-05-04	24.6615	30.9882	21.9246	0.279831
2006-05-05	17.6878	26.7865	15.3106	6.16168				2006-05-05	27.7635	13.9737	2.47803	0				2006-05-05	11.5319	23.1626	8.77435	1.08934
2006-05-06	20.3543	25.0887	13.8112	0.0521933				2006-05-06	28.3516	22.6057	9.59235	0				2006-05-06	20.9057	16.2938	7.40604	0.0203526
2006-05-07	20.4642	20.2251	11.1686	1.06362				2006-05-07	28.2648	26.028	12.269	0.231065				2006-05-07	27.3393	21.7633	11.4219	0.0517506
2006-05-08	21.3242	23.2532	12.5068	3.70564				2006-05-08	28.6358	17.1818	10.2687	0.0814525				2006-05-08	27.5138	24.6683	14.5842	0
2006-05-09	21.4992	15.5407	7.9942	1.08945				2006-05-09	17.5567	20.7562	10.411	0.155815				2006-05-09	27.3639	30.0785	16.2921	0.653358
2006-05-10	26.9559	17.9737	8.16843	0				2006-05-10	20.0211	21.2575	10.2554	0.209561				2006-05-10	9.0739	19.9103	13.5943	1.26484
2006-05-11	28.7361	20.7044	7.60403	0				2006-05-11	28.9186	18.6442	6.27887	0				2006-05-11	12.5643	18.7556	12.2945	0.0281392
2006-05-12	23.9201	22.3056	10.0365	0				2006-05-12	27.9808	21.2873	10.5745	0				2006-05-12	21.9798	22.4754	13.3577	0.588371
2006-05-13	27.4558	26.225	13.0247	0.0705089				2006-05-13	28.1697	24.5668	12.1951	0				2006-05-13	14.4501	22.1769	15.0863	0.845552
2006-05-14	17.5191	20.6847	13.6762	1.17702				2006-05-14	27.3978	28.2168	14.2512	0				2006-05-14	11.7016	16.9483	10.8183	2.60012
2006-05-15	17.9461	21.734	9.40967	1.47829				2006-05-15	18.4854	24.9146	13.0666	0.106089				2006-05-15	8.71005	13.2004	7.55026	2.80645
2006-05-16	19.5608	19.8892	11.353	0.0510776				2006-05-16	29.5321	27.338	16.2475	0				2006-05-16	23.1492	18.4859	8.31799	0.0455552
2006-05-17	28.6628	24.581	12.9358	0.0297582				2006-05-17	23.0522	28.5837	17.5354	0.153071				2006-05-17	24.3052	21.5867	10.5229	0.0217671
2006-05-18	29.321	27.3142	15.5822	0.0286888				2006-05-18	27.379	29.8989	17.9392	0				2006-05-18	27.6845	22.7831	14.155	0.0461695
2006-05-19	25.187	26.8512	16.2172	1.58819				2006-05-19	25.4955	35.8858	19.6488	0				2006-05-19	15.0096	18.4552	13.0689	1.13303
2006-05-20	3.01255	20.3208	13.753	15.3921				2006-05-20	25.9075	38.3545	23.4242	0				2006-05-20	7.64313	16.7166	11.7878	2.18459
2006-05-21	14.6554	22.9609	18.0563	2.46367				2006-05-21	21.0713	38.3476	22.6354	0.157893				2006-05-21	12.3913	16.1837	10.8334	0.682701
2006-05-22	27.3868	23.816	15.8424	0.897594				2006-05-22	17.1941	23.3328	13.2344	1.43929				2006-05-22	18.1366	20.3579	12.5056	0.327564
2006-05-23	10.4579	17.4481	13.896	0.361206				2006-05-23	9.06738	17.6172	10.1518	1.14604				2006-05-23	6.10058	16.592	12.2211	3.73068
2006-05-24	25.0932	20.4553	14.677	0.772611				2006-05-24	14.9175	18.5229	12.5884	0				2006-05-24	10.6869	14.9981	10.9781	6.01904
2006-05-25	14.1908	17.689	12.2633	0.487486				2006-05-25	5.81272	19.4555	11.7599	0.00335549				2006-05-25	9.12248	14.0685	9.63422	0.678243
2006-05-26	21.1491	21.3034	13.3241	0.147877				2006-05-26	19.4127	23.32	13.7336	0.339301				2006-05-26	27.1816	22.1879	12.7795	0.0882907
2006-05-27	29.9544	26.932	14.8298	0.0292179				2006-05-27	14.1141	21.1155	13.4743	1.40584				2006-05-27	28.0502	23.6999	13.4574	0.00620119
2006-05-28	23.066	20.7657	12.5387	0.950363				2006-05-28	18.6361	22.4805	13.2344	1.13139				2006-05-28	28.2933	25.1603	15.0631	0.0108344
2006-05-29	30.2438	22.9225	11.5115	0				2006-05-29	10.5303	18.0548	11.6973	4.36647				2006-05-29	27.855	24.1261	13.4898	0.125087
2006-05-30	28.6596	25.6253	14.3343	0.133739				2006-05-30	18.2131	19.7226	12.6737	0.813625				2006-05-30	27.2334	23.7627	14.861	0.0659924
2006-05-31	28.7462	28.3018	17.1008	0				2006-05-31	21.0426	27.4252	18.4541	0.19809				2006-05-31	12.5897	20.901	13.7624	7.47252
2006-06-01	28.5416	32.0996	20.4584	0				2006-06-01	26.4074	28.9582	13.4793	0.085857				2006-06-01	13.8797	19.2302	12.5754	3.32424
2006-06-02	22.5073	25.1953	12.0088	3.11587				2006-06-02	28.8849	30.833	19.6834	0				2006-06-02	25.03	26.0605	15.9828	0.328767
2006-06-03	27.0622	21.7098	13.1898	0				2006-06-03	20.089	31.2219	17.688	0				2006-06-03	26.2342	25.0062	17.0925	0
2006-06-04	12.4025	22.5698	19.2994	9.77264				2006-06-04	29.2254	30.4577	19.6728	0.256659				2006-06-04	23.4937	25.9955	16.0093	0.145446
2006-06-05	7.44279	20.0372	16.9185	0.738592				2006-06-05	13.3966	25.4712	17.6121	0.430012				2006-06-05	26.7698	27.0703	14.9099	0
2006-06-06	21.4682	25.8081	16.6602	0.233392				2006-06-06	24.6965	26.6596	18.5639	0.123833				2006-06-06	25.6962	24.6912	15.772	0.12454
2006-06-07	27.4675	29.1173	16.5968	0.97881				2006-06-07	28.5526	26.5775	15.9823	0.116185				2006-06-07	9.22735	18.7342	13.7491	1.08416
2006-06-08	17.6915	21.8445	15.1155	0.130709				2006-06-08	30.0411	25.3727	15.1269	0				2006-06-08	26.4307	25.8126	15.3616	0.0904359
2006-06-09	22.3587	24.0663	14.7593	0.609489				2006-06-09	25.8671	25.0883	16.054	1.55041				2006-06-09	28.5525	29.1002	17.7457	0.0174286
2006-06-10	25.2131	25.6038	16.6698	0.87484				2006-06-10	21.1017	24.595	15.5017	0.804418				2006-06-10	29.804	29.5144	19.8235	0
2006-06-11	14.9239	21.913	14.7183	0.646148				2006-06-11	23.8379	27.1029	17.8244	0.0793585				2006-06-11	17.3263	25.9013	18.2579	0.360156
2006-06-12	28.1712	25.7579	16.3272	0				2006-06-12	25.57	28.0566	18.1864	0.174135				2006-06-12	29.5889	28.9968	18.1363	0
2006-06-13	25.629	26.6099	16.7855	0				2006-06-13	29.5016	28.5566	18.4615	0.629445				2006-06-13	29.7956	31.4715	20.1359	0
2006-06-14	22.4061	25.3727	18.0742	0.164803				2006-06-14	28.3431	26.2223	16.7847	0.256006				2006-06-14	27.9511	30.7934	20.4156	0.130284
2006-06-15	18.0801	20.8306	14.5091	0.585469				2006-06-15	30.2267	28.0744	17.6349	0				2006-06-15	26.798	29.5609	20.3773	1.20171
2006-06-16	31.0751	28.5203	16.8216	0				2006-06-16	28.0495	27.5689	17.8752	0.0652554				2006-06-16	27.9046	31.8664	18.4881	0
2006-06-17	29.0889	29.0822	18.6426	0.0457138				2006-06-17	29.8771	27.4457	17.4953	0.115413				2006-06-17	27.9141	26.7873	17.4718	0
2006-06-18	23.6406	28.5346	20.1193	1.08879				2006-06-18	22.8349	26.1855	17.6212	0				2006-06-18	23.8362	26.2125	20.0723	1.48103
2006-06-19	25.4747	26.4186	20.8782	0.826985				2006-06-19	18.0227	25.9433	18.256	0.651809				2006-06-19	22.321	25.6782	19.6918	1.04983
2006-06-20	7.39625	20.6159	12.2991	15.8521				2006-06-20	20.1295	25.0804	17.3136	0.273146				2006-06-20	27.9322	26.7724	17.3891	0
2006-06-21	23.4666	24.9789	16.0961	0				2006-06-21	23.0376	26.4164	17.9019	0.719708				2006-06-21	29.7386	28.3518	17.8261	0
2006-06-22	27.5415	26.7298	18.5158	0				2006-06-22	29.5141	31.184	19.3168	0				2006-06-22	28.6944	29.3297	21.3038	0
2006-06-23	27.7271	29.0621	20.9317	0.0674254				2006-06-23	24.2306	32.0836	22.3735	0				2006-06-23	28.6923	32.1903	22.5793	0.156322
2006-06-24	27.2177	29.8863	18.4214	0.941773				2006-06-24	24.6183	30.3548	22.1095	0				2006-06-24	28.894	31.56	22.8155	0.837104
2006-06-25	29.2942	30.0237	17.3164	0				2006-06-25	28.205	32.8641	21.5053	0.0748639				2006-06-25	26.8533	30.0277	22.2682	0.480187
2006-06-26	25.6575	28.8898	17.6881	0				2006-06-26	29.6204	33.8421	22.8639	0.0727562				2006-06-26	26.9822	28.7097	18.2554	0
2006-06-27	29.5046	29.7188	18.5587	0				2006-06-27	28.5927	32.3465	22.8016	0				2006-06-27	27.323	26.3852	16.3377	0.102794
2006-06-28	23.886	29.2522	20.1913	3.85123				2006-06-28	24.9223	31.5659	21.786	0.0528665				2006-06-28	27.8605	25.0084	13.9006	0.0568404
2006-06-29	6.18356	19.7789	17.4253	5.14983				2006-06-29	29.2325	35.931	22.1195	0				2006-06-29	29.0814	26.1068	15.5693	0.0890941
2006-06-30	10.5136	21.0934	16.8455	4.07214				2006-06-30	29.2558	37.3924	22.8696	0.0600195				2006-06-30	27.3126	26.8025	16.5533	0.0723521
2006-07-01	24.7652	20.1267	16.6724	0				2006-07-01	22.2242	32.9589	21.0067	3.33805				2006-07-01	26.5079	25.6873	17.3785	0.875403
2006-07-02	28.7056	26.9382	16.4804	0				2006-07-02	1.91076	21.9259	16.8007	19.1709				2006-07-02	26.0717	26.7806	18.2741	0.187547
2006-07-03	28.1898	27.3158	15.9055	0.111404				2006-07-03	20.9632	21.0127	17.6275	7.61153				2006-07-03	23.2678	26.3994	18.6431	1.30892
2006-07-04	28.2212	26.3123	15.9439	0.178687				2006-07-04	26.2519	27.6945	19.1914	0.909368				2006-07-04	14.4357	23.2116	17.7658	5.16054
2006-07-05	29.0011	29.41	18.6776	0.139598				2006-07-05	20.7235	25.8411	17.9244	0.345018				2006-07-05	22.2577	27.6717	19.2311	0.747205
2006-07-06	28.2511	30.8366	20.8396	0.0129918				2006-07-06	21.0955	25.9353	15.5901	1.517				2006-07-06	15.7873	26.4876	15.5356	0.294127
2006-07-07	17.0146	24.6645	20.0344	4.90962				2006-07-07	25.9253	27.1059	15.3157	1.48185				2006-07-07	27.8306	27.2707	19.5787	0.102685
2006-07-08	6.79757	20.6709	15.1356	6.30811				2006-07-08	27.3977	29.6867	16.2317	0.330091				2006-07-08	24.7966	28.7993	18.5758	5.51522
2006-07-09	26.3912	26.4457	16.7319	0.207764				2006-07-09	24.6997	31.2395	16.9169	0.140728				2006-07-09	27.7313	32.1376	22.2091	0.134719
2006-07-10	18.1407	26.7735	18.5815	0.492592				2006-07-10	25.6365	31.9222	18.1921	0.163933				2006-07-10	19.5212	29.1789	20.3436	1.19668
2006-07-11	16.0983	24.4446	16.0974	0				2006-07-11	22.3765	33.5821	18.0354	0.0960843				2006-07-11	9.26071	23.3746	18.4208	4.94278
2006-07-12	28.7255	29.953	16.7323	0				2006-07-12	10.1617	22.931	14.1997	13.4233				2006-07-12	23.3294	27.2872	20.0185	1.18449
2006-07-13	29.381	32.3846	18.1985	0.0982589				2006-07-13	15.7959	23.4948	17.0046	0.196627				2006-07-13	20.1637	26.9077	16.2104	0.257944
2006-07-14	27.9017	33.3251	19.4013	0.35545				2006-07-14	26.2106	29.0001	14.5983	0				2006-07-14	26.5636	28.3836	17.7955	0
2006-07-15	28.1634	32.3448	21.2562	0.0554875				2006-07-15	29.5365	30.7307	18.6548	0				2006-07-15	28.153	29.0912	19.788	0.0904173
2006-07-16	27.8043	32.007	22.6519	0.0179186				2006-07-16	28.518	34.1063	20.4783	0				2006-07-16	26.9277	32.4074	21.9979	0.376561
2006-07-17	27.2004	29.7847	20.3733	0.0495821				2006-07-17	21.9272	34.0943	18.8402	0				2006-07-17	27.914	32.3226	22.2568	0.312827
2006-07-18	24.5131	27.5893	21.3296	0.0414131				2006-07-18	25.8753	33.7481	18.3967	0				2006-07-18	24.5631	31.8815	23.1283	0.227033
2006-07-19	22.2927	28.578	22.1627	0.0257162				2006-07-19	27.726	35.3856	23.0578	0.0630735				2006-07-19	23.2073	30.6328	23.082	0.371422
2006-07-20	24.3633	31.1342	23.091	0.508601				2006-07-20	23.3542	37.045	23.571	1.4139				2006-07-20	18.713	28.4136	20.1153	3.32485
2006-07-21	2.96993	20.4264	9.19717	1.59268				2006-07-21	15.9409	32.4069	22.0261	0.326716				2006-07-21	28.7619	28.0595	16.2788	0
2006-07-22	21.7308	20.8528	10.8134	0				2006-07-22	18.539	32.1868	23.0822	0.397053				2006-07-22	29.2102	29.221	19.1012	0
2006-07-23	29.1921	26.5829	14.1427	0				2006-07-23	20.774	32.653	22.2273	0.073001				2006-07-23	28.3658	30.5758	21.0022	0
2006-07-24	26.8163	28.5897	17.9121	0.0290254				2006-07-24	20.0223	34.0953	23.5726	0				2006-07-24	27.8263	31.1682	21.3912	0
2006-07-25	21.9669	26.0143	19.2535	0.443519				2006-07-25	16.2082	31.7054	21.5717	2.60106				2006-07-25	24.9411	30.1062	21.4778	0.790011
2006-07-26	26.4313	28.8677	19.5263	0.314037				2006-07-26	15.7472	29.8999	18.1011	0.196225				2006-07-26	12.1371	24.9092	18.55	0
2006-07-27	25.1668	26.8893	19.4778	1.30888				2006-07-27	29.4152	33.2498	19.5569	0.0688139				2006-07-27	26.4704	29.9826	17.8708	0.343709
2006-07-28	21.9381	24.5023	19.0738	2.01355				2006-07-28	24.6251	31.5807	15.6518	0				2006-07-28	27.6359	32.3723	17.0526	0
2006-07-29	19.2513	25.0791	20.0618	0.545607				2006-07-29	25.4515	29.5904	16.8167	0.0027779				2006-07-29	28.7599	31.4894	19.6718	0
2006-07-30	21.49	26.1562	18.8975	1.15729				2006-07-30	22.2642	30.2131	17.4618	0				2006-07-30	28.064	33.4655	20.9318	0
2006-07-31	22.2542	26.5372	20.4705	0.172601				2006-07-31	26.0176	30.7951	16.5339	0.0569136				2006-07-31	26.2341	34.846	21.7432	0
2006-08-01	19.5929	28.6401	19.8745	1.37869				2006-08-01	24.4575	29.4526	18.9589	0.523127				2006-08-01	15.2875	25.071	18.3955	32.9407
2006-08-02	26.4555	31.5048	21.3552	0.397859				2006-08-02	25.0672	31.4146	20.3248	0.196182				2006-08-02	23.1853	27.8159	16.9774	0.308429
2006-08-03	19.211	26.4975	22.3797	2.94347				2006-08-03	21.1255	28.5509	18.8624	2.18488				2006-08-03	27.0394	28.4866	21.3591	0.149477
2006-08-04	18.0979	25.3115	18.4039	0				2006-08-04	14.6562	26.0996	16.8184	5.28003				2006-08-04	22.2988	29.618	20.6592	0.345277
2006-08-05	25.0264	26.5091	17.0619	0.117375				2006-08-05	16.9626	23.646	16.1477	4.68312				2006-08-05	23.7261	28.5821	15.4428	0.351927
2006-08-06	26.2965	26.2329	16.7504	0.177041				2006-08-06	23.2111	25.392	17.5067	2.28438				2006-08-06	27.0721	27.8491	17.9658	0.0487571
2006-08-07	25.2476	27.3894	17.9515	0				2006-08-07	16.562	22.5188	17.8411	3.9354				2006-08-07	21.2723	29.304	17.4363	0.76329
2006-08-08	25.6505	28.8433	18.5827	0				2006-08-08	23.627	25.2364	16.2725	1.85794				2006-08-08	26.6461	24.6293	11.7604	0
2006-08-09	25.744	29.6972	19.6091	0				2006-08-09	23.0774	27.0142	15.5429	1.20798				2006-08-09	28.4358	28.0974	15.545	0
2006-08-10	26.346	29.1253	20.228	0				2006-08-10	26.0163	28.7984	16.3689	0.746391				2006-08-10	17.1175	19.7729	12.7738	0.545992
2006-08-11	20.6721	27.4165	19.6788	0.132435				2006-08-11	24.6866	30.746	17.6498	0.72166				2006-08-11	27.1291	24.5711	14.689	0
2006-08-12	18.894	25.7135	19.595	0.156344				2006-08-12	1.71432	17.9252	13.8712	0.623858				2006-08-12	27.0212	28.5875	16.8997	0
2006-08-13	24.3343	27.4453	19.3519	1.0921				2006-08-13	27.0397	27.4158	12.3983	0.0669431				2006-08-13	26.9202	31.9409	19.8477	0.0461799
2006-08-14	24.6272	28.4273	19.9104	0.75984				2006-08-14	27.858	23.5761	12.6632	0				2006-08-14	25.9836	31.2503	16.7196	0
2006-08-15	20.6492	27.4202	19.2732	0.403089				2006-08-15	26.4273	26.5564	13.4549	0				2006-08-15	26.4275	31.0679	17.9331	0
2006-08-16	23.1641	26.785	18.8478	0				2006-08-16	15.6505	24.0374	14.405	5.98545				2006-08-16	24.531	31.3404	18.5286	0
2006-08-17	21.9885	27.1743	19.1323	0				2006-08-17	18.8866	16.2218	11.8046	7.73981				2006-08-17	24.3451	30.3759	18.5128	0
2006-08-18	20.5873	28.6437	20.0241	0.223551				2006-08-18	22.1227	22.1015	13.9805	0.993609				2006-08-18	24.5968	30.7217	20.382	0.119857
2006-08-19	11.7678	22.4244	19.0061	1.11499				2006-08-19	18.0097	23.4631	15.7468	0.0876237				2006-08-19	14.6097	22.1768	16.4811	0.447201
2006-08-20	5.22524	19.8177	18.2462	6.59711				2006-08-20	20.6431	25.8239	14.8804	0.313776				2006-08-20	24.8984	28.0133	15.8975	0
2006-08-21	0.958392	18.0549	13.3414	1.3318				2006-08-21	25.2129	26.2203	13.2398	0.117643				2006-08-21	27.3085	30.0663	14.8977	0
2006-08-22	14.2792	23.6092	13.5758	0.0558823				2006-08-22	25.347	26.824	13.3098	0				2006-08-22	25.6028	32.9302	18.0012	0
2006-08-23	26.1525	28.642	15.3544	0				2006-08-23	24.3377	26.3468	14.6573	0.114693				2006-08-23	26.3146	32.5181	17.7427	0
2006-08-24	25.9625	29.6912	16.9916	0				2006-08-24	5.40718	18.0602	11.9305	7.40847				2006-08-24	26.2032	34.1045	21.8656	0
2006-08-25	13.6952	27.4912	19.4641	1.79758				2006-08-25	19.8321	20.5023	13.4146	0				2006-08-25	16.5125	30.7104	19.0728	0.15857
2006-08-26	14.3649	23.4553	17.9387	9.1731				2006-08-26	17.9717	23.0791	14.6285	0.0620414				2006-08-26	23.9643	30.7543	19.5459	0.103977
2006-08-27	20.6008	26.1476	15.0919	0.157351				2006-08-27	19.548	24.6622	12.3654	0.195934				2006-08-27	19.007	29.6084	15.6628	0.123807
2006-08-28	18.9943	26.4868	16.4203	1.01315				2006-08-28	24.4163	23.853	12.4346	0				2006-08-28	23.6504	29.8282	17.3031	0
2006-08-29	13.3656	25.9103	17.8397	0.229675				2006-08-29	24.746	25.565	12.0754	0				2006-08-29	23.9169	31.2444	18.5012	0
2006-08-30	17.0461	26.1103	16.5816	0.403048				2006-08-30	22.9845	29.5827	12.43	0				2006-08-30	22.3907	28.7318	16.2539	0.0212735
2006-08-31	22.6482	27.2281	16.5295	0				2006-08-31	24.664	30.1484	17.7182	0.0220031				2006-08-31	23.9093	28.4602	15.0045	0
2006-09-01	17.3818	25.1791	17.8891	0.263191				2006-09-01	21.1923	31.3089	19.0067	0.307032				2006-09-01	21.9062	29.516	16.7188	0
2006-09-02	20.8618	25.0317	18.0856	0				2006-09-02	19.9637	31.0167	18.7856	1.16653				2006-09-02	22.8444	29.6577	15.9119	0.13523
2006-09-03	21.7748	27.2852	18.5111	0.257229				2006-09-03	13.1358	25.0143	16.4859	5.83719				2006-09-03	22.03	31.0724	18.1312	0.771321
2006-09-04	20.7502	27.8851	18.5503	0.0895882				2006-09-04	2.88961	12.9704	7.8942	5.95664				2006-09-04	19.8762	27.6354	17.2344	2.2657
2006-09-05	14.586	26.5207	18.5131	1.85899				2006-09-05	23.6626	22.0109	12.006	0				2006-09-05	13.8687	24.9513	16.2701	1.72434
2006-09-06	2.43048	19.0327	12.0384	6.44315				2006-09-06	18.8424	28.3448	15.9302	0				2006-09-06	14.7658	25.5036	17.651	7.02634
2006-09-07	19.8656	19.1473	10.8783	0.186419				2006-09-07	19.0549	30.3224	15.6164	0.246315				2006-09-07	15.6165	22.2822	13.2209	0.261977
2006-09-08	22.5849	23.2187	11.6661	0				2006-09-08	19.797	25.3717	9.50241	0				2006-09-08	22.7305	25.6472	11.5245	0
2006-09-09	20.2287	28.2117	13.5652	0.28475				2006-09-09	18.2427	22.6357	11.8948	0				2006-09-09	21.2873	25.9764	15.6086	0.704821
2006-09-10	19.3454	25.0622	13.9575	0.044571				2006-09-10	16.0099	25.1291	15.1563	0.0415996				2006-09-10	11.6405	21.8539	14.5363	0.647432
2006-09-11	19.4732	24.8426	14.3851	0				2006-09-11	14.4622	24.8906	12.2329	0.605163				2006-09-11	9.89998	17.3276	11.7143	3.1993
2006-09-12	18.8207	28.8083	16.9757	2.12021				2006-09-12	19.2693	17.9621	10.0244	0.202164				2006-09-12	11.6447	13.0523	8.87869	2.35814
2006-09-13	19.5006	29.5029	14.5784	0.518026				2006-09-13	18.8341	18.4118	6.94086	0				2006-09-13	10.5385	17.2105	6.94635	0.502331
2006-09-14	9.052	14.5075	9.62286	0.936184				2006-09-14	19.4171	21.7667	11.2384	1.06129				2006-09-14	21.7499	21.1169	10.6938	0.0224184
2006-09-15	21.8394	21.8299	9.90756	0.0434133				2006-09-15	15.4214	22.0562	12.2048	0.10666				2006-09-15	20.6572	23.7002	6.70471	0.107597
2006-09-16	11.4789	18.739	12.5749	1.21482				2006-09-16	20.1932	24.0871	12.8926	0				2006-09-16	18.6886	21.0244	9.3869	0
2006-09-17	14.5477	19.0707	11.0169	0.396106				2006-09-17	21.4113	24.2796	9.37048	0.189291				2006-09-17	21.4176	23.5494	9.68948	0
2006-09-18	10.3872	18.8019	11.0735	0.440031				2006-09-18	21.1769	25.9781	13.4379	0				2006-09-18	21.0861	23.6295	9.93317	0
2006-09-19	17.6673	23.7886	11.6154	0.090239				2006-09-19	10.1591	24.9575	13.1264	0.302007				2006-09-19	20.4008	24.6487	13.4632	0.0430685
2006-09-20	20.6186	24.9845	13.0885	0.0195921				2006-09-20	19.8416	27.8863	12.8126	0.0648481				2006-09-20	13.3668	20.6537	11.3955	0.608549
2006-09-21	21.228	26.2128	14.743	0				2006-09-21	20.2708	28.7107	13.1646	0.0680546				2006-09-21	15.1053	22.6369	12.4898	1.12937
2006-09-22	20.6654	28.3814	14.1556	0				2006-09-22	15.3952	26.2148	13.3278	0.0636692				2006-09-22	16.6197	24.5886	12.0798	0.231787
2006-09-23	19.809	29.0026	14.6856	0				2006-09-23	3.83877	18.0402	10.4173	1.48938				2006-09-23	19.1586	26.2498	14.6042	0.0166933
2006-09-24	14.752	22.6616	13.8307	0.0148502				2006-09-24	10.5835	22.3683	10.7984	0.0752616				2006-09-24	10.3274	21.5539	12.7787	0
2006-09-25	13.3504	22.3297	14.4838	0.430767				2006-09-25	5.77782	21.1776	12.0236	2.4885				2006-09-25	4.80643	19.0346	11.7739	5.50195
2006-09-26	11.7083	21.8513	15.4853	0.247203				2006-09-26	3.3071	13.6212	8.39496	2.98778				2006-09-26	6.55385	19.6787	10.7293	1.41368
2006-09-27	5.92148	19.929	14.5872	2.41731				2006-09-27	3.04749	14.2892	5.46982	2.55929				2006-09-27	6.27526	19.2749	10.2093	0.66821
2006-09-28	5.56181	20.0403	12.7614	2.85931				2006-09-28	12.3274	17.2925	5.72656	0.778803				2006-09-28	7.13259	17.7731	8.32037	0.047377
2006-09-29	6.9427	12.9123	7.12912	2.44389				2006-09-29	14.2271	20.6585	10.4514	0.577789				2006-09-29	9.4773	18.6292	7.46845	0.935675
2006-09-30	7.13783	13.4889	6.16135	1.5474				2006-09-30	9.13795	12.4623	6.246	1.93623				2006-09-30	9.00393	19.5393	9.25662	0.32101
2006-10-01	12.6986	14.6847	5.73755	0.149587				2006-10-01	9.6366	13.9637	3.89471	0.0698354				2006-10-01	8.47525	17.6346	9.23587	0.257763
2006-10-02	17.8418	16.5453	5.1807	0				2006-10-02	17.6493	21.8802	8.90854	0				2006-10-02	10.3247	25.1281	13.3087	0.427154
2006-10-03	20.3377	21.9709	5.39893	0				2006-10-03	9.78031	17.8042	8.48911	6.12311				2006-10-03	11.0289	19.0104	8.87991	0
2006-10-04	18.6643	23.1262	6.82385	0				2006-10-04	13.1231	17.6698	4.94324	0.147939				2006-10-04	11.4384	16.984	6.70425	0.267941
2006-10-05	15.9702	24.2524	9.59177	0				2006-10-05	18.9251	17.4431	3.01553	0				2006-10-05	9.147	14.9731	5.95608	0.746912
2006-10-06	15.474	23.4612	11.0531	0				2006-10-06	19.0135	22.7315	7.44076	0				2006-10-06	17.8645	20.4222	7.60013	0
2006-10-07	16.8407	25.8333	9.90503	0.0975693				2006-10-07	17.7466	23.1052	6.43164	0				2006-10-07	17.0941	24.4594	11.1231	0.099789
2006-10-08	16.2838	18.3786	6.64557	0				2006-10-08	17.1092	25.0764	12.5757	0.0380328				2006-10-08	11.1289	25.0739	13.0766	0.0915612
2006-10-09	16.347	17.9893	5.72714	0				2006-10-09	13.2528	21.6689	7.52539	0.32341				2006-10-09	12.492	24.8499	17.1577	0.440907
2006-10-10	16.5028	17.2606	6.41428	0				2006-10-10	15.6369	17.982	7.32248	0				2006-10-10	4.87381	23.8612	13.851	0.120564
2006-10-11	17.7148	20.4019	7.30432	0				2006-10-11	16.2442	23.2733	7.82144	0				2006-10-11	10.4557	26.6568	14.456	0.70409
2006-10-12	15.2842	21.5094	8.93277	0				2006-10-12	13.3275	17.5697	7.02997	0				2006-10-12	5.06652	9.91705	5.94272	2.2427
2006-10-13	14.7756	21.368	8.52872	0				2006-10-13	16.9582	22.157	6.01102	0				2006-10-13	8.91866	7.23633	0.949677	0.611503
2006-10-14	16.8744	24.1331	9.76666	0.0723779				2006-10-14	16.7955	21.6909	4.48685	0				2006-10-14	10.3025	6.76004	-2.88135	0.83416
2006-10-15	8.42664	14.7119	7.39545	2.30967				2006-10-15	15.3925	20.2309	7.28793	0				2006-10-15	5.96726	5.95901	-1.76248	1.21127
2006-10-16	8.89072	14.708	5.08005	0.247673				2006-10-16	15.9177	21.8002	8.30667	0.16304				2006-10-16	10.8352	11.2	0.79187	0.367679
2006-10-17	16.1431	12.0644	1.39505	0				2006-10-17	15.2534	23.2486	8.01483	0.0908243				2006-10-17	11.9467	11.329	0.179077	0.067269
2006-10-18	17.0056	14.1428	0.995392	0				2006-10-18	12.4048	19.2651	7.1658	0				2006-10-18	15.8692	13.5874	2.96121	0
2006-10-19	15.7198	18.3434	3.5307	0				2006-10-19	15.1496	22.1623	8.13962	0				2006-10-19	15.9637	10.6413	1.34445	0.00265881
2006-10-20	15.6765	20.6258	5.32611	0.162233				2006-10-20	14.9768	24.7195	8.19894	0				2006-10-20	15.9468	14.2116	2.19458	0
2006-10-21	6.62979	12.3889	5.65585	0.585673				2006-10-21	13.7056	20.4746	8.45117	0				2006-10-21	15.6223	15.5833	2.15906	0
2006-10-22	7.09905	12.4465	3.31412	0.249283				2006-10-22	11.7653	23.1276	10.3476	0				2006-10-22	15.3729	16.1712	3.26172	0
2006-10-23	15.3133	15.0355	2.34638	0.0400024				2006-10-23	5.76077	19.2131	9.69934	1.06185				2006-10-23	15.6127	18.6819	0.325165	0.0491819
2006-10-24	14.6464	11.8217	0.355133	0.0376544				2006-10-24	8.16852	7.29324	1.98184	9.33154				2006-10-24	12.9688	16.8655	4.24158	0.0155873
2006-10-25	14.6837	14.1256	-0.229217	0				2006-10-25	15.3439	9.17053	-3.02554	0.0832415				2006-10-25	11.1469	14.799	4.93704	0.0744527
2006-10-26	13.8314	13.9219	-0.126221	0				2006-10-26	14.573	17.5035	3.61606	0				2006-10-26	12.2621	7.39175	-3.63934	0.0807366
2006-10-27	14.4252	16.1126	0.101257	0.0308094				2006-10-27	14.5203	4.35205	-4.40634	0				2006-10-27	15.3842	3.34021	-6.59543	0
2006-10-28	11.6639	16.0543	1.97443	0.099504				2006-10-28	12.2754	7.28345	-5.74048	0				2006-10-28	14.9533	9.28754	-3.43338	0
2006-10-29	14.2447	17.8796	4.01517	0.068815				2006-10-29	13.8286	11.4705	-4.69449	0				2006-10-29	14.3903	13.499	-1.48178	0
2006-10-30	7.6052	10.6033	-0.694244	0.0617652				2006-10-30	13.7906	13.4675	-0.85614	0				2006-10-30	14.4409	10.0501	-1.01184	0
2006-10-31	14.1572	11.3521	-0.809357	0				2006-10-31	8.82373	13.8167	-0.344971	0				2006-10-31	14.3668	11.5283	-1.68295	0
2006-11-01	13.8643	15.8385	2.38187	0				2006-11-01	5.24633	7.9577	-2.65826	0.376402				2006-11-01	13.9771	12.8375	0.976135	0
2006-11-02	13.8452	18.04	2.13251	0.0271559				2006-11-02	13.6236	13.0316	-1.81665	0				2006-11-02	13.5809	13.8246	-0.973633	0.0133282
2006-11-03	9.49259	10.9707	3.5286	0.0129233				2006-11-03	12.9757	17.8668	-0.0731812	0				2006-11-03	14.035	11.8463	-1.67206	0
2006-11-04	10.2928	9.92593	-0.134735	0.0260853				2006-11-04	13.117	16.8965	0.715485	0				2006-11-04	13.6694	13.9588	0.0533752	0
2006-11-05	10.0289	9.23767	-1.74356	0.0362361				2006-11-05	9.49395	16.6867	2.00937	0.0743926				2006-11-05	13.2908	14.0033	1.90402	0
2006-11-06	10.0069	18.0484	3.75204	0.0546175				2006-11-06	10.833	6.65903	-3.42581	0.126138				2006-11-06	12.4896	13.908	1.06668	0
2006-11-07	11.1287	12.3203	-6.86877	0.169297				2006-11-07	12.8362	8.33963	-4.88535	0				2006-11-07	11.5165	13.2335	0.534302	0.0207002
2006-11-08	6.66236	-2.16882	-8.95816	0.0143057				2006-11-08	12.754	11.5321	-0.138031	0				2006-11-08	9.42454	10.0494	-1.7251	0
2006-11-09	12.6859	0.848846	-10.5624	0				2006-11-09	10.8803	8.20749	-7.16559	0				2006-11-09	13.0096	7.87003	-2.62561	0
2006-11-10	11.26	1.99564	-5.43866	0				2006-11-10	10.2407	0.741608	-8.22574	0.0797834				2006-11-10	7.621	6.53915	-2.77411	0
2006-11-11	8.38531	1.19931	-5.21237	0.0197296				2006-11-11	7.18818	-1.47083	-7.62601	0.0146992				2006-11-11	8.12078	7.64774	-1.04245	0.225004
2006-11-12	12.4275	5.12213	-8.23489	0				2006-11-12	11.7893	2.77112	-9.62988	0.0272678				2006-11-12	7.11669	9.08328	-0.368957	0.168207
2006-11-13	11.8139	7.9603	-1.29562	0				2006-11-13	10.3488	5.51764	-4.74674	0				2006-11-13	7.55699	10.9477	-0.226044	0.011368
2006-11-14	9.75079	10.0732	-0.336029	0				2006-11-14	8.99293	12.5154	-6.14951	0.0237013				2006-11-14	11.7162	13.8584	3.18985	0
2006-11-15	8.68392	9.32114	-0.401093	0.0968688				2006-11-15	11.5989	2.34833	-5.05783	0.461372				2006-11-15	8.84297	14.3735	2.6821	0.0225617
2006-11-16	9.56969	8.25732	-0.743652	0.0766496				2006-11-16	11.0887	-1.02652	-11.6619	0.049748				2006-11-16	10.7597	14.6875	1.23144	0.0443798
2006-11-17	10.6238	7.10007	-1.82425	0				2006-11-17	11.0983	-0.750641	-10.9898	0				2006-11-17	6.11861	3.28317	-7.02408	0.29648
2006-11-18	11.6961	6.77506	-1.77399	0				2006-11-18	6.98738	2.51871	-5.08972	0.0969296				2006-11-18	7.44829	0.64563	-9.09085	0.0309953
2006-11-19	11.627	8.66721	-2.32269	0				2006-11-19	10.6608	11.1238	-2.2424	0				2006-11-19	10.912	3.51355	-5.8367	0
2006-11-20	11.2408	9.81256	-2.08374	0				2006-11-20	10.4442	13.5905	-1.2056	0				2006-11-20	11.07	5.54434	-2.91132	0
2006-11-21	10.8657	7.2576	-2.79062	0				2006-11-21	11.1561	9.94916	0.318451	0				2006-11-21	10.1487	6.52206	-0.985626	0
2006-11-22	8.73436	6.66025	-1.63489	0.015004				2006-11-22	8.17473	10.203	-2.46603	0				2006-11-22	9.91094	9.49405	-0.211578	0
2006-11-23	7.52274	5.41708	-2.12155	0.0263618				2006-11-23	11.0357	8.09943	-1.60376	0				2006-11-23	10.9945	8.08054	-0.409515	0
2006-11-24	10.8337	7.96109	-2.80911	0				2006-11-24	9.94961	8.07156	-4.53912	0				2006-11-24	8.72311	9.31525	-1.18863	0
2006-11-25	9.75268	9.17548	-6.63123	0.20061				2006-11-25	10.5344	4.67508	-4.55606	0				2006-11-25	8.81312	4.06894	-2.54263	0.0214902
2006-11-26	10.9743	-5.18072	-13.89	0				2006-11-26	8.0547	4.52664	-5.81204	0				2006-11-26	9.53961	4.55591	-3.1619	0.000285309
2006-11-27	10.8208	-0.079895	-14.3233	0				2006-11-27	10.5887	6.72354	-3.76398	0				2006-11-27	9.17018	2.72418	-4.8818	0.0255707
2006-11-28	10.7197	6.38223	-7.82361	0				2006-11-28	10.0631	10.6882	0.133636	0				2006-11-28	6.97197	1.04504	-6.86313	0.277771
2006-11-29	9.55642	4.81757	-2.33603	0.0107026				2006-11-29	4.33527	5.79553	-5.88242	0.0442355				2006-11-29	9.3738	4.35696	-3.24817	0
2006-11-30	10.2371	7.59546	-4.02911	0				2006-11-30	10.281	0.488586	-11.4183	0				2006-11-30	10.2064	7.70834	-1.57044	0
2006-12-01	5.82914	-2.6062	-10.6347	0.0288225				2006-12-01	9.96752	-0.768158	-13.7464	0				2006-12-01	9.64868	8.50769	-2.63754	0
2006-12-02	10.1457	-0.57077	-11.3702	0				2006-12-02	6.04806	-3.27615	-15.5229	0.0392186				2006-12-02	6.26367	1.2587	-5.31473	0
2006-12-03	10.2672	3.35385	-7.20084	0				2006-12-03	9.82364	-1.69656	-10.1765	0				2006-12-03	9.99033	1.69403	-6.82785	0
2006-12-04	10.0026	4.241	-6.63623	0				2006-12-04	10.2789	-0.85791	-11.3468	0				2006-12-04	10.3244	3.75931	-5.09073	0
2006-12-05	10.0112	1.06546	-8.83255	0				2006-12-05	8.50923	0.565643	-11.9809	0.0131818				2006-12-05	10.0949	5.63574	-4.85117	0
2006-12-06	9.45118	0.387756	-9.63873	0				2006-12-06	9.0602	2.17566	-6.74539	0				2006-12-06	10.1685	6.25772	-4.77988	0
2006-12-07	9.44078	2.81461	-7.17191	0				2006-12-07	9.5611	1.07428	-6.06647	0				2006-12-07	9.58781	4.48022	-5.43082	0
2006-12-08	9.81554	3.68585	-8.30249	0				2006-12-08	6.81307	4.4679	-5.68735	0				2006-12-08	9.38419	5.43994	-4.48209	0
2006-12-09	9.92471	5.95187	-4.16626	0				2006-12-09	7.59471	3.45718	-8.18216	0.0412268				2006-12-09	5.02782	0.536346	-9.49164	0.0215977
2006-12-10	7.74806	0.151703	-11.7769	0.034402				2006-12-10	9.76933	-3.90347	-13.2703	0.0259288				2006-12-10	10.0065	0.762329	-9.94721	0
2006-12-11	9.71094	-3.66382	-13.1942	0.0123302				2006-12-11	9.56803	-5.45438	-16.6107	0.0148155				2006-12-11	10.2507	4.81836	-8.04532	0
2006-12-12	7.32244	-2.54474	-11.1609	0.0112959				2006-12-12	9.29144	-0.0187988	-13.1193	0				2006-12-12	9.26024	5.55713	-8.86917	0
2006-12-13	9.20544	-0.177887	-11.1742	0				2006-12-13	9.27458	1.38379	-8.07651	0				2006-12-13	5.82026	-4.07584	-11.4509	0.0116913
2006-12-14	9.99071	3.56067	-9.06589	0				2006-12-14	8.52347	3.95145	-8.6788	0.0392904				2006-12-14	9.84659	-2.19064	-12.801	0
2006-12-15	9.81607	4.08414	-7.22571	0				2006-12-15	8.10988	-0.151276	-8.37872	0.00901888				2006-12-15	6.76508	-0.634979	-8.69366	0
2006-12-16	7.96522	2.32358	-8.38431	0				2006-12-16	9.57348	1.86536	-9.68576	0.0112967				2006-12-16	9.63076	1.17071	-8.95255	0
2006-12-17	8.38841	2.23492	-9.75699	0				2006-12-17	9.36045	3.80835	-12.1967	0				2006-12-17	9.56381	3.72067	-9.2395	0
2006-12-18	8.4468	0.780151	-10.1848	0				2006-12-18	9.39866	3.83179	-7.26495	0.00798936				2006-12-18	9.71055	5.33908	-7.15378	0
2006-12-19	9.32442	-1.38464	-11.728	0				2006-12-19	7.86579	-0.944733	-9.91473	0				2006-12-19	8.51378	4.06528	-4.69183	0.0756126
2006-12-20	9.59384	-1.37021	-12.5767	0				2006-12-20	9.07855	0.333374	-9.71612	0				2006-12-20	1.82334	0.958496	-6.64532	0.299942
2006-12-21	9.73448	0.0264282	-12.6067	0				2006-12-21	9.57483	1.84512	-7.54483	0				2006-12-21	5.27146	-9.02246	-15.7281	0.532525
2006-12-22	9.49443	1.75162	-12.0059	0				2006-12-22	9.11534	3.60196	-7.31705	0				2006-12-22	8.12541	-12.9028	-18.5978	0.00748713
2006-12-23	9.34548	0.234741	-10.6267	0				2006-12-23	9.09068	3.63779	-9.22665	0				2006-12-23	9.91029	-6.96735	-18.5215	0
2006-12-24	9.27715	3.8641	-8.23105	0				2006-12-24	9.35701	4.20184	-6.0593	0				2006-12-24	9.88993	-6.29599	-15.1591	0
2006-12-25	9.62392	3.69455	-10.1371	0				2006-12-25	9.37759	4.72604	-7.34454	0				2006-12-25	9.79392	-4.16431	-14.5641	0
2006-12-26	9.68327	0.949554	-9.96738	0				2006-12-26	10.057	0.592804	-9.99121	0				2006-12-26	9.89908	2.38095	-12.3158	0
2006-12-27	9.59559	3.77353	-11.2224	0				2006-12-27	9.59621	4.55649	-9.76843	0				2006-12-27	9.85329	2.61755	-12.6905	0
2006-12-28	6.28878	2.38895	-7.673	0.517509				2006-12-28	9.65032	5.07324	-7.35901	0				2006-12-28	9.86782	7.17361	-5.51736	0.00700886
2006-12-29	10.0324	4.38968	-8.2442	0				2006-12-29	9.93156	3.40314	-8.23163	0				2006-12-29	5.12664	-3.65021	-12.39	0.0205616
2006-12-30	9.82174	3.36841	-8.62955	0				2006-12-30	9.85978	5.57596	-7.87646	0				2006-12-30	7.66503	-1.6286	-13.1837	0
2006-12-31	9.82106	0.275574	-10.5111	0				2006-12-31	9.39344	4.13867	-5.94952	0				2006-12-31	6.61662	-3.7092	-13.7391	0.0197325
2007-01-01	7.72077	1.43951	-8.61929	0.0100045				2007-01-01	8.41084	4.6987	-5.2385	0				2007-01-01	6.40207	-2.45566	-11.5216	0.892512
2007-01-02	9.53109	2.65823	-8.80301	0				2007-01-02	9.12499	6.5766	-5.82129	0				2007-01-02	7.69687	-3.28976	-11.6742	0.00886106
2007-01-03	8.94871	5.48801	-9.85922	0				2007-01-03	8.40648	6.35559	-7.30612	0				2007-01-03	6.84528	-1.92776	-10.763	0
2007-01-04	10.3168	-6.53427	-13.3117	0				2007-01-04	6.87363	3.09876	-6.39804	0.170291				2007-01-04	10.1815	-0.269379	-10.8125	0
2007-01-05	10.5573	-4.00296	-14.4786	0				2007-01-05	0.996387	1.43518	-8.69601	0.155855				2007-01-05	10.2859	0.472717	-11.1031	0
2007-01-06	9.88306	-0.602814	-14.448	0				2007-01-06	4.18187	4.45364	-3.40784	0.0595787				2007-01-06	9.41191	0.471466	-10.0803	0.0136671
2007-01-07	9.8063	-2.71799	-10.3373	0				2007-01-07	8.6774	9.05673	-4.16937	0				2007-01-07	10.2552	2.76657	-9.03061	0
2007-01-08	8.5036	-3.79852	-12.7536	0				2007-01-08	8.6147	9.85342	-2.28812	0				2007-01-08	9.3805	0.353821	-9.65695	0
2007-01-09	10.7635	-1.44696	-13.3185	0				2007-01-09	8.22695	8.83148	-4.03342	0				2007-01-09	8.03294	-0.13977	-10.4032	0
2007-01-10	9.02082	-2.00861	-10.9812	0				2007-01-10	8.15151	5.50937	-5.36063	0.0756679				2007-01-10	10.1893	2.05731	-9.63382	0
2007-01-11	10.1977	0.59555	-11.5077	0				2007-01-11	4.20925	2.48929	-6.89542	0.0464639				2007-01-11	10.6088	1.97406	-9.57016	0
2007-01-12	9.87695	2.76169	-12.2325	0				2007-01-12	10.3616	0.507904	-9.52603	0				2007-01-12	10.5786	1.55362	-10.1113	0
2007-01-13	8.57205	0.37085	-12.0773	0.00658089				2007-01-13	9.5427	4.27896	-7.53622	0				2007-01-13	10.7576	0.880493	-9.992	0
2007-01-14	9.8581	-6.23291	-17.3026	0				2007-01-14	7.43265	1.24866	-8.5112	0				2007-01-14	10.4685	-1.09064	-12.1658	0
2007-01-15	11.0063	-6.65378	-19.2335	0				2007-01-15	9.81521	-0.113373	-11.3649	0				2007-01-15	11.1898	-0.0740356	-12.4131	0
2007-01-16	10.4775	-9.90839	-20.8574	0				2007-01-16	10.8729	-0.517578	-11.3599	0				2007-01-16	11.0273	1.47525	-10.864	0
2007-01-17	12.0266	-13.0543	-23.2202	0				2007-01-17	10.5356	2.76923	-10.3269	0				2007-01-17	11.6907	0.961639	-10.7836	0
2007-01-18	11.7755	-8.42523	-23.7027	0				2007-01-18	10.1581	1.83637	-10.298	0				2007-01-18	10.823	4.41849	-8.23181	0
2007-01-19	11.9605	-2.2511	-18.4858	0				2007-01-19	11.1465	4.1369	-8.65503	0				2007-01-19	10.6308	2.02533	-16.4506	0.370897
2007-01-20	7.32934	-0.921295	-15.9632	0.0312633				2007-01-20	11.149	10.9675	-4.28332	0				2007-01-20	8.22318	-12.8668	-23.355	0.0127503
2007-01-21	10.6699	-1.8273	-16.6094	0				2007-01-21	9.48349	1.10382	-7.74265	0.0269447				2007-01-21	11.5541	-3.33472	-18.2977	0
2007-01-22	11.39	-4.30096	-18.3395	0				2007-01-22	9.12917	1.76761	-10.1514	0.652519				2007-01-22	11.5294	3.05579	-11.5916	0
2007-01-23	11.2106	-1.52902	-16.2909	0				2007-01-23	7.46887	-4.12314	-12.6281	0.00801682				2007-01-23	9.65236	0.75412	-9.24704	0
2007-01-24	9.86258	3.22388	-12.1434	0				2007-01-24	5.38811	-3.46478	-15.4097	0.109344				2007-01-24	8.04459	0.446381	-10.9373	0
2007-01-25	11.6743	5.85217	-9.45157	0				2007-01-25	3.78206	-3.91946	-14.6862	0.212802				2007-01-25	11.4582	1.45306	-9.99649	0
2007-01-26	10.9623	6.93298	-5.1282	0				2007-01-26	2.84095	-5.3732	-16.9948	0.757496				2007-01-26	11.2311	4.97171	-8.25659	0
2007-01-27	10.4737	8.57275	-6.98874	0.0311134				2007-01-27	7.87911	-6.44342	-16.1093	0.0835576				2007-01-27	10.4878	7.61182	-7.3075	0.00993636
2007-01-28	9.10192	-4.54938	-13.1326	0.0609527				2007-01-28	9.69942	-7.44583	-19.5605	0.0437967				2007-01-28	4.18979	-5.9501	-18.1483	0.0366932
2007-01-29	9.45917	-7.78818	-16.1964	0				2007-01-29	12.592	-10.0774	-20.7762	0				2007-01-29	11.4256	-11.9079	-21.0528	0
2007-01-30	9.7771	-5.15433	-17.3762	0.043951				2007-01-30	12.7041	-7.43185	-20.2864	0				2007-01-30	12.2378	-11.8575	-22.1916	0
2007-01-31	9.30584	-9.25552	-17.5594	0.0145502				2007-01-31	12.6711	-4.49652	-16.4368	0				2007-01-31	12.5692	-10.3099	-23.9174	0
2007-02-01	12.9169	-7.97275	-19.4208	0				2007-02-01	11.8764	0.69928	-13.4621	0.0124543				2007-02-01	12.458	-5.67352	-17.3705	0
2007-02-02	13.3261	-3.86328	-20.8431	0				2007-02-02	12.4597	1.55203	-10.4996	0				2007-02-02	10.2951	-5.2648	-16.7338	0
2007-02-03	12.2689	-3.53781	-15.6353	0				2007-02-03	12.8395	-1.43103	-13.0097	0				2007-02-03	12.7776	-2.37051	-14.3741	0
2007-02-04	9.87425	-5.62689	-14.3053	0.00837955				2007-02-04	11.5705	2.11594	-10.2546	0				2007-02-04	13.5691	2.98413	-9.93597	0
2007-02-05	10.3965	0.226837	-12.6715	0				2007-02-05	12.7217	2.66946	-10.7114	0				2007-02-05	13.9326	4.93011	-7.62817	0
2007-02-06	11.239	7.45486	-9.61728	0.0278377				2007-02-06	10.1282	4.7634	-8.00192	0				2007-02-06	13.1125	8.52475	-2.46136	0
2007-02-07	10.1048	-1.89499	-14.9031	0.0818255				2007-02-07	12.9904	4.80161	-7.12445	0				2007-02-07	12.4605	6.32333	-4.89529	0
2007-02-08	14.166	-5.51263	-16.3402	0				2007-02-08	13.0188	6.17032	-5.6875	0				2007-02-08	6.48428	7.72846	-7.99283	0.0383147
2007-02-09	13.5581	-3.28449	-15.6004	0				2007-02-09	3.93884	4.28507	-5.68802	0.561481				2007-02-09	9.86457	-2.93829	-11.7391	0.0105546
2007-02-10	11.9052	-1.01111	-14.3624	0				2007-02-10	3.30547	-1.10614	-10.1248	1.10252				2007-02-10	14.5293	5.45489	-8.48459	0
2007-02-11	13.5086	4.0221	-11.1874	0				2007-02-11	11.9143	-0.465301	-13.732	0.0209571				2007-02-11	13.1685	11.8911	-2.81888	0
2007-02-12	14.1269	4.35809	-9.69632	0				2007-02-12	7.6133	-1.09186	-12.5567	0.135008				2007-02-12	5.72041	-0.158112	-11.6166	0.112419
2007-02-13	13.6984	9.26086	-6.3905	0				2007-02-13	13.1811	-6.17001	-17.2092	0.0551321				2007-02-13	9.97514	-5.64484	-15.207	0.0257968
2007-02-14	13.788	10.0354	-3.81753	0.0159818				2007-02-14	14.7402	-3.66403	-18.8756	0				2007-02-14	12.0719	-1.61859	-15.3643	0.0313
2007-02-15	11.8313	12.0222	-2.35049	0.292603				2007-02-15	14.3724	1.15112	-11.0616	0.0400992				2007-02-15	14.6554	5.88437	-6.1861	0
2007-02-16	13.6598	7.04196	-3.33319	0				2007-02-16	14.2783	-0.606537	-9.62439	0.124501				2007-02-16	14.5424	8.03097	-2.26123	0
2007-02-17	14.5737	6.89191	-6.06549	0				2007-02-17	8.98567	-4.10501	-14.4516	0.753945				2007-02-17	13.3244	7.12826	-1.96878	0
2007-02-18	12.9596	7.00647	-4.33167	0.00976678				2007-02-18	12.0021	-6.98416	-17.6723	0.220856				2007-02-18	14.5048	10.9733	-0.069519	0.0165799
2007-02-19	13.5542	3.38236	-6.11636	0				2007-02-19	13.7406	-3.16187	-14.8554	0.0539971				2007-02-19	10.3066	4.15186	-4.43359	0.0385554
2007-02-20	14.9399	5.64197	-7.34055	0				2007-02-20	12.7849	1.73895	-10.9318	0.0556403				2007-02-20	15.9029	5.68408	-6.03522	0
2007-02-21	12.7708	6.76279	-7.7186	0.0356822				2007-02-21	13.007	1.5596	-7.72049	0.0467051				2007-02-21	15.8431	10.8014	-2.64902	0
2007-02-22	16.0139	-0.74942	-10.2699	0				2007-02-22	15.6252	2.82791	-7.98938	0.0163209				2007-02-22	16.6205	5.42215	-4.52356	0
2007-02-23	13.9798	6.09592	-8.56641	0.102079				2007-02-23	15.447	1.142	-8.49777	0.0143662				2007-02-23	16.3159	6.68893	-5.53375	0
2007-02-24	8.64887	3.1568	-3.84415	0.0406725				2007-02-24	16.3743	2.31943	-8.51419	0				2007-02-24	14.2104	8.8588	-1.75714	0
2007-02-25	15.0832	7.28439	-4.60428	0				2007-02-25	15.7968	3.06256	-7.35397	0				2007-02-25	16.6161	13.5634	-0.423187	0
2007-02-26	15.2516	8.87942	-2.08865	0				2007-02-26	16.0139	4.586	-6.73276	0.0259351				2007-02-26	16.526	13.8977	0.0651245	0
2007-02-27	15.2611	12.1123	-2.02292	0.00694963				2007-02-27	16.9851	3.78409	-6.30933	0				2007-02-27	16.1638	16.5825	1.41354	0
2007-02-28	14.3288	11.4128	-1.12836	0				2007-02-28	17.3493	5.26065	-6.2764	0				2007-02-28	12.9872	13.9899	0.715363	0.131096
2007-03-01	9.76147	8.7977	-1.13943	0.0855381				2007-03-01	17.6888	9.72543	-2.65176	0				2007-03-01	9.35474	7.19394	-2.22592	0.0827112
2007-03-02	17.9383	8.64731	-1.19708	0				2007-03-02	16.9051	11.2489	0.142822	0				2007-03-02	6.99352	1.8114	-6.28204	0.570066
2007-03-03	18.1096	14.8634	-0.241669	0				2007-03-03	15.9935	14.3268	-1.06833	0				2007-03-03	15.4759	4.89206	-7.84708	0.0395358
2007-03-04	18.7759	17.3072	-0.41922	0				2007-03-04	17.4184	12.9769	-4.98114	0				2007-03-04	18.298	10.0708	-0.952331	0.0169846
2007-03-05	19.0143	20.0865	-0.746948	0				2007-03-05	16.397	5.02564	-7.33829	0				2007-03-05	19.5008	8.81445	-2.9939	0
2007-03-06	17.9574	20.3472	-0.186035	0				2007-03-06	18.7924	9.147	-3.03265	0				2007-03-06	18.3982	10.9952	0.0267944	0
2007-03-07	14.052	13.9216	3.71799	0.144705				2007-03-07	18.2881	12.9837	-0.136658	0				2007-03-07	13.0985	9.46616	0.0421143	0.0292245
2007-03-08	10.0286	6.47733	-1.67465	0.532181				2007-03-08	19.1152	11.6543	-2.25571	0				2007-03-08	11.6076	5.30362	-5.52335	0.0656523
2007-03-09	18.5154	8.37906	-2.29691	0				2007-03-09	19.6066	18.2338	1.94546	0				2007-03-09	18.73	5.10898	-7.35428	0.00270584
2007-03-10	16.036	9.48648	-1.06577	0				2007-03-10	18.7105	20.3244	7.18491	0				2007-03-10	20.3971	8.99185	-2.61408	0
2007-03-11	19.3155	12.7047	-1.37012	0				2007-03-11	8.03023	8.40985	-1.50201	0.0754138				2007-03-11	17.8391	9.46088	-1.6821	0
2007-03-12	19.2065	18.0798	1.0798	0				2007-03-12	19.5422	8.72876	-2.37763	0				2007-03-12	19.0918	12.3025	-0.41449	0
2007-03-13	17.3282	12.2628	-0.593018	0.022585				2007-03-13	19.6377	11.9658	1.19656	0				2007-03-13	20.0651	9.29697	-1.9137	0
2007-03-14	18.7525	13.1185	-0.672485	0.0163216				2007-03-14	19.7212	13.1405	2.3219	0				2007-03-14	19.9774	10.2596	-1.09021	0.00847804
2007-03-15	20.4478	15.3419	5.53799	0.0401345				2007-03-15	19.1634	14.9185	4.47733	0				2007-03-15	20.6123	17.2744	2.61621	0
2007-03-16	17.2776	11.5879	0.33432	0.0264451				2007-03-16	19.514	14.1935	3.59232	0.157681				2007-03-16	21.8519	20.7027	5.90445	0.0155032
2007-03-17	20.3629	11.0605	1.01431	0				2007-03-17	15.3586	13.3478	2.91049	0.0861622				2007-03-17	11.2615	10.1228	-2.19473	0.298999
2007-03-18	21.5819	17.5084	1.73871	0.0137631				2007-03-18	20.4855	17.3984	4.45245	0				2007-03-18	15.403	5.02893	-4.74603	0
2007-03-19	19.8971	13.6542	-0.0585938	0				2007-03-19	19.6083	15.2131	5.51804	0.0709983				2007-03-19	18.8842	11.2087	0.149078	0.0525555
2007-03-20	17.6558	18.7502	2.38641	0				2007-03-20	16.7683	17.7985	4.74149	0				2007-03-20	18.8127	12.2767	1.5163	0.0262675
2007-03-21	16.7534	17.5073	2.41397	1.35642				2007-03-21	20.7436	20.3188	7.29919	0				2007-03-21	14.7411	9.09061	-1.39654	0.106754
2007-03-22	17.3712	8.37082	-1.41968	0.0115583				2007-03-22	20.8133	18.7606	7.12237	0				2007-03-22	21.2044	9.51752	-1.7449	0
2007-03-23	21.7997	11.9865	-1.22732	0				2007-03-23	16.9434	10.5135	1.03668	0.18072				2007-03-23	18.0457	9.41611	1.39612	0.032025
2007-03-24	20.9247	16.0594	0.00262451	0.0291501				2007-03-24	9.4815	6.21182	-2.56772	1.71878				2007-03-24	22.6192	21.0342	5.9036	0
2007-03-25	19.3417	14.1805	3.38113	0.00958285				2007-03-25	21.2708	14.1537	-0.878967	0				2007-03-25	17.3859	16.5912	4.29773	0
2007-03-26	20.7686	18.7966	5.0946	0.147122				2007-03-26	22.7356	13.7559	2.52573	0.0409282				2007-03-26	21.1211	18.7426	4.70029	0
2007-03-27	19.7981	18.1754	7.26166	0				2007-03-27	21.6914	17.6919	4.51541	0				2007-03-27	21.5092	21.6372	8.54141	0
2007-03-28	21.1027	20.7009	6.28003	0				2007-03-28	21.1869	20.5155	6.78659	0.0033274				2007-03-28	22.9186	26.0217	9.84366	0
2007-03-29	20.1757	22.2442	9.15857	0.130697				2007-03-29	12.9823	16.9941	5.4324	0.119957				2007-03-29	22.3508	28.9335	12.5607	0.0871899
2007-03-30	15.1399	17.9581	8.60529	0.409493				2007-03-30	20.2702	21.9803	7.96991	0.0740438				2007-03-30	17.5057	25.4369	13.1134	0.279664
2007-03-31	1.38983	8.09604	1.61148	0.643934				2007-03-31	20.7051	18.4411	8.19992	0.0279736				2007-03-31	15.3094	18.6981	10.0068	0.0317579
2007-04-01	19.4959	11.424	0.820984	0.018516				2007-04-01	18.7753	16.3189	6.06595	0.0876304				2007-04-01	21.9939	23.331	10.6824	0
2007-04-02	20.6772	13.6454	1.04602	0				2007-04-02	22.6387	20.026	6.24393	0.054907				2007-04-02	16.5843	24.2763	8.64798	0.0460988
2007-04-03	21.3057	18.8786	1.39468	0				2007-04-03	24.2491	15.9003	4.89661	0				2007-04-03	21.4186	17.1335	5.147	0
2007-04-04	20.6068	18.7855	7.63739	0.0253318				2007-04-04	23.764	16.0898	5.00235	0				2007-04-04	13.4458	13.7371	6.1507	3.25128
2007-04-05	21.9279	19.8431	8.11185	0.0450154				2007-04-05	23.3344	20.3762	7.75693	0				2007-04-05	17.4999	13.7291	4.18106	0.196818
2007-04-06	20.643	20.3671	10.0039	0.00745998				2007-04-06	22.8037	22.8389	6.15973	0				2007-04-06	22.8423	15.9193	5.95645	0.0273974
2007-04-07	20.1607	21.5012	10.1278	0.0198649				2007-04-07	23.1027	12.0755	2.93942	0				2007-04-07	24.3998	26.248	9.03085	0
2007-04-08	4.0055	13.2838	9.03113	0.436465				2007-04-08	24.323	6.57513	-1.78986	0				2007-04-08	22.9389	26.3276	6.53079	0.707444
2007-04-09	6.18574	11.2708	9.05246	0.683268				2007-04-09	24.7888	6.24744	-1.79657	0				2007-04-09	18.0535	11.372	0.995789	0.0814629
2007-04-10	17.2377	16.2829	8.67661	0.0449039				2007-04-10	25.3696	11.2425	0.526672	0				2007-04-10	23.7663	15.2141	2.32755	0
2007-04-11	23.6213	22.344	9.21869	0				2007-04-11	24.7339	12.4466	4.12381	0.0344956				2007-04-11	21.1089	18.9603	7.58292	0.420549
2007-04-12	16.4438	17.8205	8.64246	4.54601				2007-04-12	20.6168	13.82	3.83835	0.297807				2007-04-12	17.0548	17.1442	6.23843	0.00450626
2007-04-13	13.1348	12.0511	6.4581	0.153331				2007-04-13	22.6476	15.521	4.18607	0.0184758				2007-04-13	20.3161	16.1881	5.87222	0.0203147
2007-04-14	18.6864	14.9178	6.77063	0.0164972				2007-04-14	24.862	22.4669	7.08664	0				2007-04-14	16.9749	14.7957	5.32986	0.212498
2007-04-15	24.0068	18.8323	7.73581	0.09514				2007-04-15	26.6303	23.7052	11.6341	0				2007-04-15	24.9896	17.9862	6.3371	0.458638
2007-04-16	18.5284	18.9249	9.71268	0.562885				2007-04-16	20.2382	23.6861	10.2207	0				2007-04-16	22.2878	19.461	5.84467	0.0979174
2007-04-17	13.6126	17.9662	9.61731	0.394437				2007-04-17	19.3971	16.4499	3.77774	0.0940137				2007-04-17	22.0534	17.7565	7.23514	0
2007-04-18	23.5731	21.8681	10.1182	0.0136899				2007-04-18	26.5883	17.6704	4.1925	0				2007-04-18	25.2921	21.1153	9.77252	0
2007-04-19	22.0618	21.4488	11.5849	0.245039				2007-04-19	23.3321	22.7574	10.2446	0				2007-04-19	24.6136	21.9137	9.72177	0
2007-04-20	15.8154	18.9802	11.0059	0.100798				2007-04-20	21.3588	30.0479	16.1482	0				2007-04-20	25.8304	20.9062	10.4039	0
2007-04-21	10.6787	8.84799	3.4173	0.327574				2007-04-21	20.2693	27.392	15.8012	0.322877				2007-04-21	17.8833	17.4999	7.7131	0.031378
2007-04-22	23.334	15.3384	5.01318	0				2007-04-22	21.4734	26.424	12.5691	2.10529				2007-04-22	25.8267	14.7658	1.79999	0.0197355
2007-04-23	22.3683	17.7792	7.11108	0				2007-04-23	19.5214	13.5778	6.50946	0.075776				2007-04-23	25.5499	14.6935	3.42291	0
2007-04-24	25.8487	20.4377	5.13385	0.0316541				2007-04-24	26.8697	17.1564	7.22043	0				2007-04-24	25.764	23.3939	11.8414	0.021179
2007-04-25	26.6506	20.5841	5.73889	0				2007-04-25	26.0976	15.2664	7.08908	0.018268				2007-04-25	21.6273	23.3837	12.2433	0.016546
2007-04-26	26.4481	28.0881	12.9969	0.0503019				2007-04-26	26.5612	19.1589	9.03183	0				2007-04-26	13.9905	13.8104	5.69315	0.021598
2007-04-27	21.5055	21.8842	7.771	0.134597				2007-04-27	25.6322	16.4553	6.07608	0.0359189				2007-04-27	25.0886	18.1549	7.19565	0
2007-04-28	27.2439	20.0978	7.58856	0				2007-04-28	27.2933	10.3595	4.72147	0				2007-04-28	18.0796	16.2456	7.99081	0.00385854
2007-04-29	24.6977	28.8438	12.9268	0.0575507				2007-04-29	26.5834	17.1214	6.34598	0				2007-04-29	24.7454	23.0993	9.90527	0.0599175
2007-04-30	26.6897	23.4237	13.0712	0				2007-04-30	27.027	17.3209	9.28827	0				2007-04-30	24.7365	23.7913	11.447	0
2007-05-01	27.2904	29.1852	14.2141	0.0199887				2007-05-01	27.3242	20.5822	9.25992	0				2007-05-01	28.1767	26.0182	10.2381	0
2007-05-02	27.4383	27.9525	14.7106	0				2007-05-02	16.7221	16.562	8.04938	0.936892				2007-05-02	27.7543	25.0315	12.9946	0.0142068
2007-05-03	23.7513	24.1398	17.1827	0.160438				2007-05-03	27.9383	21.0683	6.82416	0.0985864				2007-05-03	25.6065	24.6468	14.036	0.559801
2007-05-04	26.195	29.3128	18.4134	0.581234				2007-05-04	27.8288	28.7129	15.4625	0.0618563				2007-05-04	14.6951	18.6279	11.2007	3.32192
2007-05-05	21.7062	22.1895	9.2561	0.592089				2007-05-05	25.8295	26.8169	5.66205	0.190983				2007-05-05	16.1028	17.2705	9.63351	0.230497
2007-05-06	19.5834	17.1553	9.03769	0.147809				2007-05-06	28.1024	17.5105	6.76135	0				2007-05-06	26.6528	26.9158	13.2595	0.0125725
2007-05-07	23.9448	19.9977	10.2897	0.0396011				2007-05-07	27.8486	23.9236	12.4449	0				2007-05-07	26.511	22.1023	12.4008	0
2007-05-08	25.2051	23.8841	12.2544	0.176494				2007-05-08	28.0393	25.2771	15.9146	0.0245321				2007-05-08	22.4238	20.4367	11.3786	0.164862
2007-05-09	17.9152	22.6026	15.9296	1.09405				2007-05-09	28.7861	24.5178	15.6338	0				2007-05-09	26.0396	23.9067	12.1418	0
2007-05-10	18.8718	24.5881	16.2163	0.63148				2007-05-10	27.5942	29.0158	17.039	0.164427				2007-05-10	25.4274	21.882	10.375	0
2007-05-11	25.2328	24.9581	14.6584	0.836539				2007-05-11	16.1317	32.4293	15.0317	2.60007				2007-05-11	28.458	23.2185	13.3026	0
2007-05-12	2.59738	12.4312	2.63162	1.76217				2007-05-12	10.3745	12.8134	7.12112	1.04056				2007-05-12	22.4758	22.1645	13.7341	0.914862
2007-05-13	18.8516	13.2399	6.7897	0.238954				2007-05-13	15.4057	18.526	9.384	0.219786				2007-05-13	27.5837	25.907	12.8469	0
2007-05-14	25.8197	17.978	7.72589	0.773757				2007-05-14	27.6851	22.912	11.4479	0.0609593				2007-05-14	28.8125	25.3075	15.2965	0
2007-05-15	12.1339	14.8271	9.74588	0.148344				2007-05-15	26.6671	27.4293	16.0221	0.105783				2007-05-15	25.3301	26.3961	15.8959	0
2007-05-16	14.5731	14.8643	10.8166	18.0344				2007-05-16	22.3857	26.6848	16.4771	0.110092				2007-05-16	18.1118	22.3112	14.8926	0
2007-05-17	20.8325	17.8715	8.29422	0.103907				2007-05-17	23.8315	28.1809	12.9977	8.28754				2007-05-17	24.8199	24.3247	14.7446	0.0193395
2007-05-18	27.8817	22.7253	11.0625	0.0695671				2007-05-18	23.2931	21.1392	11.1719	2.00739				2007-05-18	13.3019	21.2179	13.2336	0.068457
2007-05-19	24.9477	23.124	12.4665	1.51113				2007-05-19	28.0075	21.6049	8.14023	0				2007-05-19	28.5671	30.1837	17.0226	0
2007-05-20	13.5266	13.0448	10.6414	2.48768				2007-05-20	26.5501	24.4513	10.9823	0.489456				2007-05-20	10.8498	19.4168	13.1268	3.59365
2007-05-21	27.4069	21.1044	5.37906	0.0626448				2007-05-21	15.1703	16.9463	9.38312	0.141038				2007-05-21	14.6588	17.1783	11.3634	0.710563
2007-05-22	25.5868	19.1914	7.28604	0				2007-05-22	27.3238	25.3471	11.1599	0.1303				2007-05-22	28.3893	24.1603	14.4754	0.015173
2007-05-23	29.2245	18.736	10.8152	0				2007-05-23	23.0994	25.654	13.6756	0.0578451				2007-05-23	24.6693	24.423	15.5526	0
2007-05-24	30.3693	23.2971	12.6339	0				2007-05-24	22.7325	21.3505	11.7422	0.550429				2007-05-24	20.6053	20.8052	12.994	0.169439
2007-05-25	23.384	22.6301	12.4556	0				2007-05-25	12.0911	16.5385	9.72226	1.2844				2007-05-25	10.8559	16.6709	11.1765	0.35255
2007-05-26	28.6291	24.2134	14.5055	0				2007-05-26	23.8181	22.3542	13.2814	0				2007-05-26	23.068	22.4399	12.5305	0
2007-05-27	29.8449	26.3504	15.0783	0.0290618				2007-05-27	22.5114	23.5279	12.4208	0.370045				2007-05-27	26.9231	24.9443	12.8344	0
2007-05-28	30.074	28.4569	16.7823	0.0305333				2007-05-28	28.1618	24.0589	12.6395	0				2007-05-28	28.7201	27.5008	15.9087	0
2007-05-29	29.0475	25.8516	16.6973	0.360302				2007-05-29	28.5635	20.8415	9.4642	0				2007-05-29	28.4134	27.5053	16.5742	0
2007-05-30	28.2068	26.9686	15.1105	0.855864				2007-05-30	22.6114	20.7878	12.7933	0				2007-05-30	27.5922	29.5712	17.0171	0
2007-05-31	20.1841	21.5873	10.716	0				2007-05-31	28.5654	26.363	13.7911	0.195412				2007-05-31	29.4181	32.8202	21.3582	0
2007-06-01	28.3328	24.4535	12.3117	0				2007-06-01	26.6495	28.229	16.201	0.0889853				2007-06-01	27.7379	33.9041	22.0293	0
2007-06-02	29.4478	29.4267	15.4313	0				2007-06-02	23.8956	26.4283	15.8498	0.0206681				2007-06-02	23.6475	28.8174	19.3706	0.987792
2007-06-03	27.974	28.2564	16.5566	0.0157963				2007-06-03	28.9654	26.3527	17.6029	0.451142				2007-06-03	19.4091	28.5354	18.2612	0
2007-06-04	30.3425	30.8887	18.8093	0.0488226				2007-06-04	13.3151	24.9418	15.7927	0.30425				2007-06-04	28.0592	32.6988	21.9143	0.804412
2007-06-05	17.4799	25.5471	16.2625	1.63861				2007-06-05	8.6813	22.3504	13.7249	1.80662				2007-06-05	25.3663	31.7548	20.704	2.50881
2007-06-06	24.6638	25.5633	16.2818	0.105901				2007-06-06	18.5323	23.2321	13.8391	0.20574				2007-06-06	28.151	30.4832	19.5219	0.214231
2007-06-07	24.9752	28.0783	18.5038	0.413503				2007-06-07	22.9409	24.7379	16.0249	0.405763				2007-06-07	28.3269	30.1345	19.9502	0.0450054
2007-06-08	25.3987	27.0441	16.1539	0				2007-06-08	26.9439	26.5893	17.2909	0.309755				2007-06-08	19.2804	27.5178	17.1622	0
2007-06-09	29.5798	30.4453	18.4481	0				2007-06-09	19.6917	23.9478	16.5624	1.00475				2007-06-09	28.5493	26.3694	12.2395	0
2007-06-10	22.8778	25.1047	14.3422	0.567242				2007-06-10	24.8383	27.231	17.976	0.112028				2007-06-10	30.2619	24.9503	14.2213	0
2007-06-11	13.2801	16.9462	9.83371	2.20501				2007-06-11	28.978	29.8427	18.4906	0.114561				2007-06-11	29.2649	27.6162	18.2189	0.0936296
2007-06-12	16.1958	23.6549	11.1975	0.0570314				2007-06-12	22.4173	28.2984	18.8677	0				2007-06-12	29.4465	29.0004	17.9828	0.0291862
2007-06-13	26.9984	24.6804	13.129	0				2007-06-13	28.1015	29.4585	19.4982	1.83844				2007-06-13	29.6323	30.7468	20.5417	0
2007-06-14	27.1033	29.1374	16.7899	2.26166				2007-06-14	27.8511	31.6165	20.2893	0.263769				2007-06-14	26.6474	29.8346	20.4711	2.1026
2007-06-15	26.4186	25.2495	15.4332	0.282409				2007-06-15	21.3162	30.2972	19.4458	0				2007-06-15	23.4004	29.6502	19.8647	0.206925
2007-06-16	29.9627	23.2502	14.7925	0				2007-06-16	20.87	29.4516	18.6596	0.554207				2007-06-16	25.0475	26.6458	17.5346	0.622685
2007-06-17	29.7084	25.425	13.1982	0				2007-06-17	26.8614	26.9517	19.0064	0.187302				2007-06-17	26.9509	24.9611	13.3885	0.455895
2007-06-18	31.7705	22.863	12.9269	0				2007-06-18	26.8421	28.8155	19.7715	0.734066				2007-06-18	26.5717	25.5762	16.0744	0
2007-06-19	29.2771	27.1307	15.9008	0				2007-06-19	30.0583	25.3082	14.8243	0.0897399				2007-06-19	25.2449	25.7373	14.0884	0.125496
2007-06-20	28.7525	32.2139	19.7941	0				2007-06-20	30.1545	22.5104	15.8141	0				2007-06-20	28.2538	27.763	17.6182	0
2007-06-21	25.126	31.4047	20.9754	1.02595				2007-06-21	29.2822	25.3882	17.3031	1.02655				2007-06-21	27.3789	30.4331	19.8331	0
2007-06-22	8.39525	22.4026	18.6717	3.39746				2007-06-22	26.4894	26.9524	18.5631	0.101087				2007-06-22	26.9838	31.998	21.3545	0.117237
2007-06-23	17.2789	19.3148	13.0567	0.513452				2007-06-23	28.4256	28.1337	19.3527	0.0677022				2007-06-23	28.8331	30.2914	17.228	0
2007-06-24	28.5464	27.2466	15.5056	0				2007-06-24	26.176	26.574	17.7217	0.0769062				2007-06-24	29.8542	28.059	15.7729	0
2007-06-25	21.0232	26.6776	18.5691	0.39153				2007-06-25	29.9812	28.5074	17.7172	0.0733522				2007-06-25	29.8428	31.2726	17.2095	0.108174
2007-06-26	17.5571	25.2135	20.3611	1.84964				2007-06-26	26.9583	24.9642	16.2021	0.0742256				2007-06-26	29.8864	33.7675	20.5385	0
2007-06-27	26.9093	26.6564	18.7495	0.176965				2007-06-27	27.0626	25.3531	17.6762	0.184809				2007-06-27	23.2658	32.1836	20.2096	0.06692
2007-06-28	29.1564	29.4815	19.2385	0.0815189				2007-06-28	29.1926	28.3254	18.2801	0.0664102				2007-06-28	25.325	33.1315	19.0715	9.6705
2007-06-29	28.0328	31.445	18.6677	0				2007-06-29	26.4129	29.8298	19.2482	0.0379237				2007-06-29	15.9047	25.0946	17.0916	0.551773
2007-06-30	25.8424	30.1092	19.9056	0.0644784				2007-06-30	19.5874	29.9009	19.2869	0.258842				2007-06-30	28.2598	27.8969	18.7839	0.0722406
2007-07-01	21.5867	30.604	20.983	0.1135				2007-07-01	17.6702	26.8156	19.3803	0.435193				2007-07-01	27.7007	29.7195	20.2775	1.14469
2007-07-02	15.1439	30.9131	21.9786	5.49067				2007-07-02	24.6061	30.9494	21.3451	0.182922				2007-07-02	27.5861	30.7838	22.0516	2.98088
2007-07-03	12.4367	23.0944	16.2107	9.04339				2007-07-03	29.0485	32.7967	21.9748	0				2007-07-03	23.0925	28.5468	20.9288	6.78829
2007-07-04	15.935	24.1479	16.6848	1.28254				2007-07-04	22.2349	31.7414	22.3865	0				2007-07-04	18.9349	27.5778	20.5553	9.2473
2007-07-05	27.6637	28.725	17.7951	0.101634				2007-07-05	26.101	35.3564	22.3035	0				2007-07-05	25.2508	30.2869	20.6072	0.363648
2007-07-06	20.8665	28.8524	18.3314	0.250873				2007-07-06	20.7095	35.122	17.1761	6.10692				2007-07-06	27.3347	32.1302	23.1067	0
2007-07-07	24.6754	29.2484	19.3873	0.853301				2007-07-07	26.9918	25.1852	17.7967	0.839645				2007-07-07	24.9018	30.2633	20.4859	0.223277
2007-07-08	26.6963	32.489	19.7184	0				2007-07-08	27.9698	27.9311	17.1859	0				2007-07-08	27.1104	26.433	14.473	0
2007-07-09	26.4004	31.8434	20.8207	0.22456				2007-07-09	28.2506	26.0021	16.8124	0				2007-07-09	27.9349	25.7471	18.3942	0.115337
2007-07-10	22.536	29.0919	21.8369	1.11638				2007-07-10	29.924	26.4888	17.8153	0				2007-07-10	25.4532	28.9295	20.8242	1.08106
2007-07-11	8.296	22.3186	20.0034	2.82763				2007-07-11	30.1065	28.8002	19.1111	0				2007-07-11	15.8987	26.6052	18.4136	0.776125
2007-07-12	18.5121	26.9974	20.2782	6.1715				2007-07-12	28.88	31.485	20.6491	0.0650946				2007-07-12	25.7066	28.7758	17.2082	0.0498604
2007-07-13	29.0856	32.0589	20.3469	0.0841977				2007-07-13	24.3377	30.2893	20.729	0				2007-07-13	28.5252	29.3269	18.3532	0.23054
2007-07-14	25.0801	34.0956	20.6902	0.062615				2007-07-14	25.1165	29.8239	20.0232	0.071982				2007-07-14	26.5005	29.8965	20.0487	0
2007-07-15	27.3508	32.7755	21.3973	0.332347				2007-07-15	28.1339	29.7224	19.1817	0				2007-07-15	28.4545	32.3292	21.8437	0
2007-07-16	26.535	32.661	23.5939	0.0694556				2007-07-16	14.4861	23.0147	17.8837	4.84966				2007-07-16	27.8021	33.3962	23.2824	0
2007-07-17	28.1049	32.5288	24.8189	0				2007-07-17	27.0099	30.2209	18.1181	0.0123548				2007-07-17	26.8994	32.7309	23.4389	0
2007-07-18	26.1916	33.3976	24.4399	0				2007-07-18	17.0109	29.8134	20.3788	0.405104				2007-07-18	24.7184	32.9656	23.0082	0.166809
2007-07-19	25.7629	32.4264	24.0074	0				2007-07-19	29.6127	31.3393	21.9781	0				2007-07-19	19.3493	29.9019	22.4823	0.467716
2007-07-20	17.2766	30.2775	21.6649	8.65045				2007-07-20	29.455	33.3019	22.7551	0				2007-07-20	15.2899	27.6104	20.7299	0.0948631
2007-07-21	3.03174	19.5822	12.2731	5.84234				2007-07-21	27.5031	33.9993	21.9976	0				2007-07-21	14.3501	23.6798	19.4416	1.13973
2007-07-22	16.929	20.2508	13.3986	0.013385				2007-07-22	23.7929	34.5394	22.727	0				2007-07-22	22.5783	28.9048	19.9581	0.0654115
2007-07-23	18.0078	22.3836	14.7476	0.0887562				2007-07-23	16.7168	32.9781	22.6087	2.38306				2007-07-23	24.1899	29.5967	18.4449	0.050078
2007-07-24	28.7016	28.8023	16.9695	0				2007-07-24	19.7379	30.6614	19.5884	0				2007-07-24	27.3975	32.264	20.5954	0
2007-07-25	25.432	27.9968	17.8611	0.0411104				2007-07-25	15.7932	26.7232	18.1788	9.18733				2007-07-25	28.2778	35.5739	23.4398	0.0138694
2007-07-26	25.4952	25.889	18.6078	0.383984				2007-07-26	3.63787	24.2048	15.4956	7.18267				2007-07-26	24.9338	36.5723	24.4742	0
2007-07-27	19.3801	22.488	16.8156	6.35517				2007-07-27	21.0442	24.5109	17.6021	7.91155				2007-07-27	19.1944	29.4637	22.1758	5.20628
2007-07-28	20.483	20.4456	16.6562	3.70032				2007-07-28	25.5895	30.8241	19.3348	0.523262				2007-07-28	9.56682	24.797	18.7627	2.33522
2007-07-29	22.9626	25.5805	18.1427	0.828129				2007-07-29	15.9842	18.9155	13.3651	0.499123				2007-07-29	12.9355	24.1325	18.0973	7.48035
2007-07-30	9.73994	21.7728	17.4016	3.39742				2007-07-30	27.5369	27.6655	15.2597	0.315472				2007-07-30	18.0355	24.7328	16.077	0.187514
2007-07-31	20.1882	21.4119	16.2891	1.63007				2007-07-31	14.7857	17.5609	12.9421	0.649372				2007-07-31	25.4751	27.2578	17.3956	0
2007-08-01	22.6668	24.7955	17.5188	0.749665				2007-08-01	17.3383	20.45	13.9233	3.67613				2007-08-01	28.1853	32.5476	18.0325	0
2007-08-02	24.5392	25.6672	16.4241	0.704337				2007-08-02	21.7953	19.4914	13.2731	3.37396				2007-08-02	29.0788	34.4145	21.8012	0
2007-08-03	23.7968	25.1062	17.5039	0.452528				2007-08-03	23.9873	19.016	12.8608	9.95787				2007-08-03	27.8325	36.7911	24.7887	0
2007-08-04	14.7679	24.2169	19.3793	0				2007-08-04	23.3913	22.2898	14.9404	2.21979				2007-08-04	18.1871	27.8345	20.3232	0.153571
2007-08-05	21.9638	24.281	17.3056	0.951927				2007-08-05	22.0533	21.8913	14.8648	2.47753				2007-08-05	18.5675	25.839	17.9806	0.0830718
2007-08-06	23.2322	23.9525	16.5509	1.60963				2007-08-06	19.5242	22.1636	15.4138	2.7906				2007-08-06	27.6056	34.4562	17.9854	0
2007-08-07	23.534	27.236	17.7285	0				2007-08-07	18.8632	24.0666	16.6469	1.20206				2007-08-07	25.6352	35.8416	24.5288	0
2007-08-08	25.1759	28.1783	19.418	1.0968				2007-08-08	19.3299	27.2413	19.1822	0.341242				2007-08-08	13.7576	30.3818	22.2447	0.522134
2007-08-09	22.2083	28.8457	20.5538	0.509582				2007-08-09	25.4611	30.2287	21.1342	0.487463				2007-08-09	22.5445	34.4481	22.0864	0.482575
2007-08-10	15.8487	25.2735	19.9255	3.02657				2007-08-10	25.4455	30.7914	19.7971	0.562534				2007-08-10	23.3249	34.4155	22.4302	0.609178
2007-08-11	22.7592	26.0261	20.0375	0.691558				2007-08-11	27.0346	30.2922	17.2339	0.270432				2007-08-11	25.7896	34.4287	21.7507	0.289519
2007-08-12	18.5968	24.0684	18.7147	0.713379				2007-08-12	18.5655	24.332	17.2447	0				2007-08-12	26.2026	34.6124	21.3061	0.0849527
2007-08-13	23.5314	27.2137	19.6393	0.0385056				2007-08-13	11.6709	23.9512	17.4762	0.168865				2007-08-13	22.2742	34.0104	21.8299	0.057995
2007-08-14	19.6809	27.6962	19.9915	2.05299				2007-08-14	17.0468	27.023	18.9947	0.146117				2007-08-14	23.6046	34.4032	23.1358	4.25234
2007-08-15	24.3111	28.6281	19.3634	0				2007-08-15	24.908	28.7809	18.198	0				2007-08-15	18.9925	30.9187	21.3283	8.75041
2007-08-16	23.8691	27.8329	19.133	0				2007-08-16	25.761	28.3829	18.0953	0				2007-08-16	19.0955	27.518	19.8238	9.39812
2007-08-17	23.7005	27.9004	18.4558	0				2007-08-17	24.159	27.2509	18.4334	0				2007-08-17	10.9767	25.167	18.565	1.95487
2007-08-18	23.2545	31.5107	19.379	0.0822617				2007-08-18	7.53162	26.6291	18.6593	1.25526				2007-08-18	10.6747	21.179	12.1533	0.857054
2007-08-19	12.394	22.0705	13.756	0.016355				2007-08-19	16.611	24.1216	16.8394	0.498681				2007-08-19	24.865	24.4132	14.9653	0
2007-08-20	20.6696	26.8797	15.8106	0.38339				2007-08-20	16.2686	26.2868	17.382	0.535416				2007-08-20	11.2592	20.5379	14.6043	3.52721
2007-08-21	4.87776	20.0002	11.3677	11.3391				2007-08-21	23.6123	28.0714	17.9531	0.12839				2007-08-21	12.2724	18.9174	10.2968	0.268008
2007-08-22	21.7251	22.8074	13.617	0.195239				2007-08-22	25.7248	29.6545	18.4922	0.215906				2007-08-22	21.7895	21.7754	13.4036	0.0856838
2007-08-23	23.9284	26.2298	14.9452	0.520019				2007-08-23	25.2885	29.4605	19.54	0.126936				2007-08-23	20.4883	22.9033	14.2445	0.193968
2007-08-24	18.4992	24.4153	16.3192	1.24489				2007-08-24	25.1511	30.85	20.0163	0.33814				2007-08-24	24.6049	26.5513	15.4826	0.0200487
2007-08-25	22.496	26.3694	15.4551	0.123452				2007-08-25	6.84424	24.9005	17.5454	5.84271				2007-08-25	24.2952	27.4248	17.3774	0.42464
2007-08-26	25.0111	24.3721	14.3515	0				2007-08-26	26.4449	31.4788	18.3563	0.0590115				2007-08-26	16.0353	21.9472	15.9567	1.77895
2007-08-27	23.9078	27.4259	15.2585	0				2007-08-27	26.1988	30.8989	19.1129	0				2007-08-27	21.5215	25.1257	16.3402	0.810267
2007-08-28	24.5901	31.2178	19.3631	0				2007-08-28	23.0271	29.297	18.7144	0				2007-08-28	22.6065	27.2726	15.602	0
2007-08-29	23.8983	33.207	20.0774	0.248852				2007-08-29	12.9133	29.9562	18.6658	1.44653				2007-08-29	24.5788	30.9396	18.6626	0
2007-08-30	16.4648	27.672	19.3298	2.25662				2007-08-30	14.7228	24.3028	17.3289	1.93373				2007-08-30	20.3979	30.9821	20.2373	1.04149
2007-08-31	21.8267	29.857	20.3262	1.0222				2007-08-31	10.4744	21.9157	16.07	2.0813				2007-08-31	17.0354	25.5272	14.2922	0
2007-09-01	6.64501	19.2451	9.52484	4.86497				2007-09-01	15.4455	24.6303	15.5411	0.425463				2007-09-01	15.7004	25.4803	15.6498	0.459383
2007-09-02	5.38793	15.4477	10.4992	3.72501				2007-09-02	23.5018	25.3012	15.2703	0				2007-09-02	23.1207	25.7326	12.8514	0
2007-09-03	12.1127	17.672	8.22992	0.35862				2007-09-03	24.5001	26.0762	17.1056	0				2007-09-03	23.3668	29.0888	16.4017	0
2007-09-04	23.9727	21.2503	9.44693	0				2007-09-04	23.7448	26.736	16.4331	0				2007-09-04	20.3324	29.8219	16.0153	0.248238
2007-09-05	22.8656	24.9464	12.4452	0.0578651				2007-09-05	22.2287	31.197	18.3667	0.108435				2007-09-05	22.9901	31.5821	16.4107	0.384019
2007-09-06	19.6679	26.4455	16.8026	3.1128				2007-09-06	20.6241	30.9691	18.2997	6.09405				2007-09-06	16.1879	24.9097	12.0435	0.171525
2007-09-07	17.4075	21.6134	13.215	0.10081				2007-09-07	20.5833	25.22	16.1709	0.317122				2007-09-07	19.8544	26.8266	15.2013	0.452669
2007-09-08	20.4298	23.6816	14.1819	0				2007-09-08	17.5905	26.0516	14.5715	0.0836999				2007-09-08	17.1864	26.9066	15.8535	0.184625
2007-09-09	1.91738	18.3046	10.41	8.2975				2007-09-09	21.3278	22.2729	13.4252	0.138993				2007-09-09	14.4866	24.2361	15.5002	0.848665
2007-09-10	20.8338	23.3575	12.2362	0.352606				2007-09-10	18.8106	24.0475	13.768	0.31413				2007-09-10	22.2147	30.626	12.115	0.0685769
2007-09-11	10.0429	19.5488	10.7998	1.91702				2007-09-11	23.0296	26.0433	15.8077	0.0489096				2007-09-11	23.9191	28.3363	15.7198	0
2007-09-12	18.0992	18.847	10.4438	0.00978438				2007-09-12	22.2762	30.9625	17.8047	0.10389				2007-09-12	19.7822	28.652	16.5876	0.0206361
2007-09-13	13.7849	20.7734	9.28214	0.30705				2007-09-13	10.4786	27.0163	16.2048	1.32436				2007-09-13	20.9013	32.428	17.4871	0.00878784
2007-09-14	20.8226	24.4983	10.3164	0.086552				2007-09-14	17.1482	23.7169	14.0271	0.244136				2007-09-14	19.5073	33.8384	19.4992	0.0868653
2007-09-15	12.9596	21.1545	13.9353	1.71602				2007-09-15	20.8646	26.9546	15.5083	0				2007-09-15	11.9429	25.987	15.7132	0.927762
2007-09-16	18.5885	23.1895	12.2795	0.328067				2007-09-16	5.3477	23.1824	13.6772	5.24786				2007-09-16	22.232	23.7716	6.29669	0
2007-09-17	22.1512	24.6227	12.2601	0				2007-09-17	19.9119	24.9351	12.6002	0.0782436				2007-09-17	21.555	23.9851	9.48172	0
2007-09-18	19.5674	25.7982	13.1113	2.49925				2007-09-18	17.5681	24.3931	11.144	0.150344				2007-09-18	16.925	26.747	11.3636	0
2007-09-19	9.85735	17.4269	10.6679	0.801746				2007-09-19	17.455	27.58	14.7816	0.0931995				2007-09-19	21.4398	26.4657	5.34885	0
2007-09-20	15.0008	19.5759	11.3692	0.169276				2007-09-20	21.3404	24.3874	10.2044	0				2007-09-20	22.0328	16.673	3.00034	0
2007-09-21	15.2803	20.0625	12.0602	0.127649				2007-09-21	20.9324	28.1703	14.8857	0.0680547				2007-09-21	21.7795	20.1297	5.94296	0
2007-09-22	8.96147	17.2871	8.89612	0.215579				2007-09-22	19.4002	28.2909	13.7738	0				2007-09-22	20.5407	24.7458	10.1667	0
2007-09-23	20.4123	20.5332	9.30936	0				2007-09-23	5.5133	21.9448	12.746	16.4519				2007-09-23	20.4507	28.6511	10.5294	0
2007-09-24	21.0387	25.2921	11.2159	0				2007-09-24	14.2271	18.3925	9.90433	0.370815				2007-09-24	21.0309	30.7786	13.3907	0
2007-09-25	8.59644	22.0442	12.5805	1.32941				2007-09-25	18.3625	24.8303	13.5618	0.193069				2007-09-25	20.3666	28.3066	13.2204	0
2007-09-26	20.3343	24.4912	11.7072	0.0300071				2007-09-26	14.0555	23.428	13.4026	0.566787				2007-09-26	16.5381	25.5587	14.4347	7.54517
2007-09-27	18.1827	23.6927	12.0575	0.0788912				2007-09-27	7.24977	17.6906	9.31818	3.18654				2007-09-27	6.10481	19.4457	9.70126	1.12582
2007-09-28	12.4012	21.0168	13.7329	0.123565				2007-09-28	6.19231	14.6227	4.04605	2.00363				2007-09-28	19.6361	26.9534	13.5033	0
2007-09-29	18.0311	24.1026	13.6441	0.0442317				2007-09-29	7.97227	14.0549	1.87201	0.466155				2007-09-29	18.2949	28.8633	14.2858	0.223233
2007-09-30	9.82894	20.3096	13.5168	5.14331				2007-09-30	19.5822	17.3303	4.57065	0				2007-09-30	17.2466	25.9387	11.2322	1.24387
2007-10-01	12.8382	17.9008	8.34018	1.23056				2007-10-01	19.4038	17.6728	6.59769	0				2007-10-01	18.5621	24.7373	14.0971	0.366794
2007-10-02	12.5087	16.5271	7.76779	0				2007-10-02	13.9314	20.748	5.43799	0				2007-10-02	9.33418	18.3191	4.69492	0.338427
2007-10-03	15.7156	17.5355	8.63016	0.239994				2007-10-03	18.6616	18.5655	6.79578	0				2007-10-03	19.2003	20.1839	4.3284	0
2007-10-04	19.0837	21.5057	8.85565	0				2007-10-04	13.2429	15.3764	4.99103	0				2007-10-04	18.452	18.3958	6.50607	0.0283056
2007-10-05	16.7261	21.5492	9.11389	0				2007-10-05	18.3717	20.3066	4.39771	0.054658				2007-10-05	17.7149	22.3529	8.42838	0.0197606
2007-10-06	16.0842	20.7372	9.24243	0.055755				2007-10-06	18.5154	23.0027	8.21576	0				2007-10-06	16.5138	23.5271	10.5354	0.0135924
2007-10-07	18.4406	23.5558	10.4197	0				2007-10-07	16.7806	23.5131	8.59683	0.166593				2007-10-07	18.7521	28.3641	12.6245	0.340546
2007-10-08	15.904	22.6336	13.1936	0.0299776				2007-10-08	15.3589	20.9499	8.88318	1.28497				2007-10-08	12.0264	18.9124	8.32221	0.0961692
2007-10-09	4.82887	18.0155	11.9534	9.99669				2007-10-09	9.34723	9.58279	1.88742	7.64891				2007-10-09	9.99339	13.8756	4.12375	0.449878
2007-10-10	7.66803	14.2999	7.30396	0				2007-10-10	15.5589	8.1369	0.896027	0.359631				2007-10-10	4.12965	9.03394	3.79825	4.98547
2007-10-11	13.1769	16.3248	6.68298	0.0499322				2007-10-11	16.264	6.00833	-0.366669	0.38903				2007-10-11	10.2255	8.55261	1.94037	0.395497
2007-10-12	15.5638	17.8195	6.31793	0.117825				2007-10-12	14.7783	12.553	1.42609	0				2007-10-12	14.1154	14.7802	2.30688	0.218582
2007-10-13	15.8646	16.6987	3.6236	0.0318301				2007-10-13	16.9004	13.7791	-1.77274	0				2007-10-13	8.92469	10.4121	3.47421	1.2798
2007-10-14	17.6229	12.9024	0.578369	0				2007-10-14	15.7719	15.1814	2.23334	0				2007-10-14	9.92684	10.3693	1.27835	2.28406
2007-10-15	16.8072	12.7592	-0.0930481	0				2007-10-15	7.20693	11.5879	2.83878	4.76926				2007-10-15	7.5759	9.74262	1.59311	0.715611
2007-10-16	17.2094	16.4842	2.42145	0				2007-10-16	0.0426548	10.3213	-0.198792	4.69304				2007-10-16	17.0201	13.588	1.86145	0
2007-10-17	16.3486	18.8512	4.0964	0.0513856				2007-10-17	15.978	14.8696	3.43686	0.0920917				2007-10-17	17.1945	16.9693	5.0654	0
2007-10-18	8.87877	15.3297	1.42572	0.466096				2007-10-18	15.7671	14.7459	-0.862701	0				2007-10-18	15.8332	15.5384	2.26889	0
2007-10-19	14.2142	8.06155	-3.12881	0				2007-10-19	16.0517	18.4402	4.09247	0				2007-10-19	12.522	17.572	3.3045	0
2007-10-20	16.3709	13.591	-2.45221	0				2007-10-20	13.3479	18.4937	2.49863	0				2007-10-20	15.6202	18.183	2.46622	0
2007-10-21	14.7121	19.6135	0.614136	0				2007-10-21	15.3808	18.2584	6.43368	0				2007-10-21	15.5286	15.5138	-1.34485	0
2007-10-22	15.4579	17.3534	2.62097	0				2007-10-22	15.2348	18.6802	3.4772	0				2007-10-22	15.3712	17.6909	3.75363	0
2007-10-23	15.0557	21.4312	6.74826	0				2007-10-23	15.5495	25.7333	4.74219	0				2007-10-23	15.4447	21.1311	1.09878	0.411855
2007-10-24	14.8133	15.509	3.70792	0.443195				2007-10-24	12.8646	12.5966	-3.28046	0.0492449				2007-10-24	15.1747	17.9302	3.12259	0.0164339
2007-10-25	10.3549	10.3257	3.28638	0.362393				2007-10-25	14.5592	7.44183	-3.17621	0				2007-10-25	13.5821	16.7534	4.16718	0.0326759
2007-10-26	13.8823	14.3269	2.05588	0.0430168				2007-10-26	13.9472	16.7648	0.875519	0				2007-10-26	12.3487	15.6172	6.19693	0.102161
2007-10-27	13.681	16.0109	1.05438	0.029295				2007-10-27	14.3331	13.8302	-1.50494	0				2007-10-27	7.88567	15.1762	2.66067	1.14172
2007-10-28	13.4238	14.9912	1.9678	0				2007-10-28	11.9134	16.557	1.85257	0.925415				2007-10-28	7.42149	10.541	1.51151	4.01965
2007-10-29	14.7353	14.8081	-0.389618	0				2007-10-29	13.4597	14.1078	-0.980072	0				2007-10-29	7.3395	6.10574	-5.80322	1.46341
2007-10-30	14.1759	10.435	-1.77014	0				2007-10-30	13.6315	13.3132	-0.876129	0				2007-10-30	9.55724	6.2728	-4.44125	0.306886
2007-10-31	14.8432	10.39	-1.62445	0				2007-10-31	14.1921	15.021	-0.514191	0				2007-10-31	13.3614	7.30264	-3.7951	0.0607885
2007-11-01	13.7605	15.1401	-0.176483	0.0180745				2007-11-01	8.23204	13.9372	3.73804	1.05386				2007-11-01	14.1867	6.98526	-6.41956	0.0153192
2007-11-02	13.0629	16.0455	1.90317	0.0348074				2007-11-02	13.3343	12.3241	-0.0533447	0.136391				2007-11-02	13.4278	9.64096	-6.56161	0.0170653
2007-11-03	11.7667	14.6859	3.87772	0.0209187				2007-11-03	12.141	9.16055	-4.6604	0				2007-11-03	10.768	10.1479	-3.50226	0
2007-11-04	12.857	20.1704	-2.1189	0.124669				2007-11-04	13.4971	9.42578	-4.52747	0				2007-11-04	10.6981	10.119	-2.39179	0.0359543
2007-11-05	14.4286	7.55835	-2.64206	0				2007-11-05	13.3051	13.7318	0.328155	0				2007-11-05	13.1148	11.0945	-0.614075	0
2007-11-06	13.3498	6.49655	-0.912872	0				2007-11-06	11.2886	17.1934	1.32468	0				2007-11-06	12.2652	12.0747	-0.12558	0.0377737
2007-11-07	12.2374	10.8528	-0.292145	0.0158804				2007-11-07	11.939	17.7874	2.99332	0				2007-11-07	12.8597	9.1004	-5.26263	0
2007-11-08	7.87804	10.3396	0.0501099	0.058086				2007-11-08	3.78729	12.8367	0.96286	0.0543791				2007-11-08	12.867	5.19528	-5.86655	0
2007-11-09	10.2529	12.8652	0.403778	0				2007-11-09	9.15877	5.38641	-2.26526	0.121784				2007-11-09	12.9891	5.95258	-4.83749	0
2007-11-10	6.66322	11.7577	1.97522	1.07924				2007-11-10	12.5148	2.47281	-7.67609	0				2007-11-10	12.8354	6.4885	-4.78507	0
2007-11-11	11.2857	13.3268	1.85107	0				2007-11-11	12.5739	9.20734	-4.34555	0				2007-11-11	13.1044	5.12601	-5.25497	0
2007-11-12	12.0032	18.1496	3.53772	0				2007-11-12	12.71	13.3219	-2.13425	0				2007-11-12	11.3776	8.37598	-2.42548	0
2007-11-13	11.1234	15.3486	2.41892	0				2007-11-13	10.8008	8.96878	-2.09537	0.071746				2007-11-13	11.3998	10.3402	-0.988953	0
2007-11-14	10.9771	17.1203	-1.58514	0.522125				2007-11-14	10.5277	10.8085	-2.50757	0.0228232				2007-11-14	11.8012	7.48755	-2.0701	0
2007-11-15	2.75254	0.782715	-5.13385	0.499851				2007-11-15	11.5481	4.66354	-3.00644	0				2007-11-15	11.4734	2.5892	-5.30234	0
2007-11-16	12.2668	1.86371	-5.35464	0				2007-11-16	10.9464	11.0489	-3.05368	0				2007-11-16	11.9115	2.785	-6.60727	0
2007-11-17	11.9825	3.70694	-4.23889	0				2007-11-17	10.909	13.4221	-1.50223	0				2007-11-17	11.5218	3.43179	-6.4086	0
2007-11-18	10.6706	5.87857	-2.88644	0				2007-11-18	11.1976	6.19015	-1.27872	0.0546659				2007-11-18	11.5085	4.35098	-5.25803	0
2007-11-19	11.4825	5.94663	-1.83063	0				2007-11-19	10.8144	4.88419	-3.67313	0.00931569				2007-11-19	11.1743	6.98831	-4.00421	0
2007-11-20	10.7738	8.90479	-2.03357	0				2007-11-20	11.0286	1.19144	-6.34293	0.0291823				2007-11-20	11.0124	9.37949	-1.74741	0
2007-11-21	11.0959	10.3827	0.121857	0.0363238				2007-11-21	11.3668	5.03775	-6.53451	0				2007-11-21	11.1242	9.83234	-0.284271	0
2007-11-22	8.1404	7.33252	-4.24649	0.101662				2007-11-22	10.3867	2.2756	-8.72833	0				2007-11-22	7.06483	5.64706	-7.43906	0.139277
2007-11-23	10.333	0.599335	-6.43149	0				2007-11-23	11.121	-0.0559387	-8.6644	0				2007-11-23	9.11436	-0.144989	-10.3211	0.0190155
2007-11-24	10.7689	0.462982	-7.56369	0.0298611				2007-11-24	10.7174	1.7139	-8.01584	0				2007-11-24	9.9899	-2.01688	-8.94348	0.0267874
2007-11-25	5.19949	1.03122	-5.79794	0.0703312				2007-11-25	8.70025	4.10538	-5.54746	0.0160188				2007-11-25	8.69398	-0.332825	-8.57138	0
2007-11-26	10.6715	3.50497	-7.09299	0				2007-11-26	10.5419	6.38577	-4.04349	0				2007-11-26	10.3693	-1.56003	-9.01596	0
2007-11-27	10.8428	5.34982	-4.34161	0				2007-11-27	10.5233	6.25324	-5.13471	0				2007-11-27	10.2557	-0.0733337	-9.27606	0
2007-11-28	7.61958	-0.0117493	-9.86484	0.00876617				2007-11-28	10.0754	1.12979	-8.92127	0.0671408				2007-11-28	10.1527	1.34726	-7.23822	0
2007-11-29	6.5688	-2.81735	-11.3869	0.0342578				2007-11-29	10.4447	-3.80063	-12.8285	0				2007-11-29	7.71619	2.05814	-4.92807	0
2007-11-30	9.28663	-1.52402	-12.0972	0.0105022				2007-11-30	10.3319	-3.43869	-13.233	0				2007-11-30	9.78215	2.32663	-5.57037	0
2007-12-01	7.37387	0.636261	-6.62289	0.00961633				2007-12-01	10.3684	-1.96982	-11.4416	0				2007-12-01	10.4408	6.32803	-5.17175	0
2007-12-02	8.32637	0.492096	-7.83569	0				2007-12-02	10.7988	3.14655	-8.02057	0				2007-12-02	9.98128	2.67493	-6.15945	0
2007-12-03	8.48499	1.21985	-10.9465	0				2007-12-03	9.36586	-0.874847	-7.91403	0.0236551				2007-12-03	8.91458	2.56103	-6.87686	0
2007-12-04	10.1097	-0.851837	-12.8849	0				2007-12-04	10.0354	1.17792	-9.6088	0				2007-12-04	9.57984	7.01486	-4.58121	0
2007-12-05	8.53408	2.59262	-9.09427	0				2007-12-05	9.82677	0.959198	-12.5894	0				2007-12-05	9.56054	-0.948456	-8.56775	0
2007-12-06	9.06603	3.9997	-8.03214	0.00514853				2007-12-06	9.80639	-1.14304	-9.74387	0				2007-12-06	10.1934	1.23965	-9.1192	0
2007-12-07	9.59215	3.03162	-5.57034	0				2007-12-07	10.1539	2.36591	-10.013	0				2007-12-07	10.0453	3.66476	-6.18722	0
2007-12-08	10.0669	3.68942	-7.67307	0				2007-12-08	9.10094	2.57364	-8.45261	0				2007-12-08	9.81903	7.60992	-5.21436	0
2007-12-09	9.80199	4.58484	-7.07834	0				2007-12-09	8.58071	-0.57312	-9.62741	0.0229697				2007-12-09	9.61861	5.04056	-6.1286	0
2007-12-10	9.09369	3.83804	-4.92657	0.0295527				2007-12-10	9.86848	-0.942719	-10.5701	0.00836957				2007-12-10	9.57048	6.67764	-3.21469	0
2007-12-11	2.97048	1.45712	-5.34512	0.0347272				2007-12-11	9.59517	0.722137	-10.1216	0				2007-12-11	6.91319	7.14233	-4.27267	0.0603582
2007-12-12	3.50208	-0.831024	-10.8439	3.07502				2007-12-12	9.26991	4.35217	-7.42337	0				2007-12-12	8.90934	3.19452	-6.50476	0
2007-12-13	10.2634	-3.81012	-12.0014	0				2007-12-13	9.65461	4.94742	-7.5621	0.0179783				2007-12-13	9.76821	6.43784	-5.01993	0.0109601
2007-12-14	10.7027	0.77713	-12.756	0				2007-12-14	7.86063	1.50552	-9.20834	0.0183267				2007-12-14	8.7813	3.47849	-5.61453	0.0204428
2007-12-15	8.3776	-0.070221	-10.0827	0.0352186				2007-12-15	9.60831	3.34634	-8.48831	0				2007-12-15	7.97562	1.13535	-6.21725	0
2007-12-16	7.94776	-0.0663452	-9.6337	0				2007-12-16	9.38512	6.05856	-8.35129	0				2007-12-16	9.71026	2.7092	-6.90945	0
2007-12-17	8.73962	4.1113	-8.55048	0				2007-12-17	8.91484	9.22208	-5.1936	0				2007-12-17	9.57878	6.34253	-6.16657	0
2007-12-18	9.6455	5.95145	-7.83514	0				2007-12-18	9.41984	0.240601	-8.96332	0				2007-12-18	9.61394	3.4964	-7.67651	0
2007-12-19	8.28281	2.60168	-6.1337	0				2007-12-19	8.57011	1.05203	-11.394	0				2007-12-19	8.03424	5.64972	-4.34537	0
2007-12-20	6.80976	2.16522	-7.51584	0.299988				2007-12-20	8.99101	-8.32181	-14.4757	0.00467496				2007-12-20	6.55544	3.78708	-5.31976	0.0196799
2007-12-21	4.03655	-2.45526	-11.2352	0.53253				2007-12-21	9.5338	1.40012	-12.0095	0				2007-12-21	7.77127	5.87994	-4.39227	0.0178014
2007-12-22	5.66848	-7.49008	-15.3338	0.712504				2007-12-22	9.31083	0.412415	-9.56866	0				2007-12-22	8.64877	4.74057	-4.90179	0
2007-12-23	8.65644	-10.6367	-16.7213	0				2007-12-23	9.65088	3.69806	-8.01956	0				2007-12-23	6.84167	4.64206	-4.33752	0
2007-12-24	9.8279	-11.0736	-19.3836	0				2007-12-24	9.67458	6.67264	-7.0849	0				2007-12-24	9.46676	4.26309	-5.10495	0
2007-12-25	9.78387	-13.0371	-20.6081	0				2007-12-25	9.48991	2.32715	-7.54983	0				2007-12-25	8.22261	4.80627	-5.60107	0
2007-12-26	9.82575	-5.32547	-16.8148	0				2007-12-26	9.5461	5.38364	-9.79593	0				2007-12-26	5.71272	-2.87237	-9.58856	0.00894687
2007-12-27	9.79564	-4.82739	-15.525	0				2007-12-27	9.64395	-4.06567	-13.2582	0				2007-12-27	9.7828	3.48544	-10.1741	0
2007-12-28	9.37612	-2.18463	-15.3187	0				2007-12-28	9.85459	-4.30515	-14.9447	0				2007-12-28	9.83311	6.48334	-6.08829	0
2007-12-29	10.2862	-0.817017	-14.1697	0				2007-12-29	8.91649	2.85815	-9.25528	0				2007-12-29	5.1308	3.97684	-6.84915	0
2007-12-30	10.1094	-0.106262	-13.7547	0				2007-12-30	9.01154	-0.854492	-12.228	0				2007-12-30	7.75732	0.820801	-9.09134	0.0124217
2007-12-31	9.90128	2.29544	-11.9367	0				2007-12-31	9.59878	-5.0163	-15.9418	0				2007-12-31	7.74692	1.14062	-8.13828	0.00911815
2008-01-01	9.49114	2.8844	-8.40134	0				2008-01-01	9.70536	2.35416	-8.84866	0				2008-01-01	8.30811	3.39304	-5.97534	0
2008-01-02	8.99133	1.39291	-9.9111	0				2008-01-02	9.12351	6.28653	-5.35904	0				2008-01-02	5.99046	-0.0444031	-8.47049	0
2008-01-03	9.58854	5.27072	-7.40033	0				2008-01-03	8.59633	7.99545	-4.5679	0				2008-01-03	8.03795	0.0733948	-9.23004	0
2008-01-04	8.575	3.96686	-8.9678	0				2008-01-04	8.6395	7.77344	-3.44211	0				2008-01-04	7.59624	-0.825928	-10.1424	0
2008-01-05	4.88233	-3.53851	-12.631	0.169339				2008-01-05	9.04516	8.61884	-3.46396	0				2008-01-05	6.92178	-0.407776	-11.394	0
2008-01-06	10.089	-2.48321	-13.8343	0				2008-01-06	7.55532	8.53165	-5.22971	0				2008-01-06	10.3246	1.32425	-10.8846	0
2008-01-07	9.05809	5.23123	-8.91873	0				2008-01-07	7.038	5.2446	-5.02887	0.157882				2008-01-07	9.27758	-0.451935	-9.23181	0
2008-01-08	8.28108	0.195404	-11.197	0				2008-01-08	7.86792	0.895783	-9.26376	0.243539				2008-01-08	9.11322	-0.545349	-10.8553	0
2008-01-09	7.26786	-3.40494	-12.9695	0.113342				2008-01-09	3.24082	-1.86935	-11.8501	2.61				2008-01-09	7.25635	-0.0617676	-9.88406	0
2008-01-10	7.668	-6.22592	-14.2138	0				2008-01-10	8.33316	-7.75619	-16.0692	0				2008-01-10	9.97157	1.45953	-9.07187	0
2008-01-11	8.15451	-4.69388	-14.5325	0				2008-01-11	10.3801	-9.25473	-19.2368	0				2008-01-11	8.30691	-2.68283	-13.1181	0
2008-01-12	10.0684	-5.64526	-18.0828	0				2008-01-12	10.4251	-7.24615	-20.1149	0				2008-01-12	10.735	-0.0792236	-12.824	0
2008-01-13	10.5227	-7.44339	-19.8448	0				2008-01-13	10.4577	-6.91769	-19.5775	0				2008-01-13	9.17821	0.400543	-11.3226	0
2008-01-14	10.2092	-9.13458	-19.6056	0				2008-01-14	10.217	-4.10379	-15.6619	0				2008-01-14	10.6543	2.63296	-10.7094	0
2008-01-15	9.67754	-4.34598	-19.2355	0				2008-01-15	11.1832	-2.12735	-15.4847	0				2008-01-15	9.20767	3.6521	-7.32986	0
2008-01-16	10.3967	-4.2283	-16.4063	0				2008-01-16	10.2577	3.35397	-12.3719	0				2008-01-16	10.7572	1.61493	-8.73502	0
2008-01-17	9.45039	-3.97079	-16.0164	0				2008-01-17	9.1669	4.83395	-9.22046	0				2008-01-17	7.29673	1.41861	-8.6817	0
2008-01-18	7.2722	-6.79599	-15.2653	0.0199318				2008-01-18	2.59736	-0.113586	-8.82944	0.216159				2008-01-18	10.9011	2.13168	-8.89593	0
2008-01-19	3.96679	-9.06061	-14.3736	1.16701				2008-01-19	9.34036	4.00217	-8.83557	0				2008-01-19	11.1002	2.50372	-7.83096	0
2008-01-20	3.14164	-8.983	-17.8921	1.2751				2008-01-20	10.0773	4.4017	-9.16696	0.0170517				2008-01-20	11.0271	3.22238	-5.94144	0
2008-01-21	9.55565	-13.7541	-20.42	0				2008-01-21	9.81662	-6.55258	-13.5625	0				2008-01-21	11.2373	6.56686	-5.08566	0
2008-01-22	11.9311	-14.3695	-21.8365	0				2008-01-22	10.9284	-2.78412	-13.3621	0				2008-01-22	11.044	3.08283	-6.65421	0
2008-01-23	11.852	-8.90134	-20.6327	0				2008-01-23	11.5282	-0.405334	-10.7495	0				2008-01-23	11.2673	2.04266	-8.45584	0
2008-01-24	12.4158	-6.60037	-17.7339	0				2008-01-24	10.8532	4.83993	-5.93213	0				2008-01-24	11.5597	0.859924	-9.29346	0
2008-01-25	10.7263	0.329163	-15.7503	0				2008-01-25	9.12017	2.32901	-7.50174	0.0207958				2008-01-25	11.2819	2.34524	-8.83142	0
2008-01-26	11.4713	-1.1199	-12.6801	0				2008-01-26	10.5641	1.76483	-9.50024	0.0340331				2008-01-26	12.0558	1.24204	-9.39493	0
2008-01-27	10.2476	0.95462	-11.0701	0.29371				2008-01-27	11.6371	-0.0405273	-9.28928	0.00536027				2008-01-27	8.83359	1.89349	-8.90091	0
2008-01-28	9.9387	-6.92316	-13.7026	0.0092773				2008-01-28	11.573	3.62036	-9.03638	0				2008-01-28	12.8792	4.10193	-7.34247	0
2008-01-29	9.9387	-6.92804	-14.2203	0.0092773				2008-01-29	11.573	4.31854	-7.1571	0				2008-01-29	12.8792	5.2149	-4.97138	0
2008-01-30	12.6212	-0.337982	-16.1581	0				2008-01-30	11.8402	1.83676	-6.84781	0				2008-01-30	11.4566	8.23273	-2.20431	0
2008-01-31	13.0725	1.50897	-10.7033	0				2008-01-31	6.25148	7.9595	-4.04981	0.00853371				2008-01-31	12.1667	8.70322	-2.84616	0
2008-02-01	10.4318	-3.75888	-13.4967	0				2008-02-01	12.3999	5.94125	-3.59753	0				2008-02-01	12.4303	-2.89612	-12.8235	0
2008-02-02	11.523	-2.69589	-15.2471	0				2008-02-02	12.179	0.638367	-9.5976	0				2008-02-02	5.97952	-3.70828	-15.7555	1.14862
2008-02-03	11.4067	-2.09549	-13.6611	0				2008-02-03	12.2838	2.83041	-8.96039	0				2008-02-03	13.1929	2.35187	-12.305	0
2008-02-04	7.37549	-2.18765	-10.8604	0.0063713				2008-02-04	12.9899	7.57831	-6.87991	0				2008-02-04	12.9473	3.93643	-8.66611	0
2008-02-05	5.21897	1.77856	-11.0848	0.0573031				2008-02-05	13.5084	7.14841	-5.8754	0				2008-02-05	12.1688	-1.66861	-13.3767	0.00514646
2008-02-06	12.6025	6.3035	-6.65595	0				2008-02-06	12.2175	2.94339	-5.54242	0				2008-02-06	11.6778	-1.3064	-14.6401	0
2008-02-07	12.6564	6.85648	-5.63275	0.0172132				2008-02-07	12.0848	6.5596	-5.01019	0				2008-02-07	13.9767	5.01968	-8.5564	0
2008-02-08	11.7815	-4.43018	-8.21494	0.326999				2008-02-08	13.3594	7.3168	-4.10239	0				2008-02-08	13.8144	6.92425	-5.6734	0
2008-02-09	3.86633	-3.19754	-8.55655	0.0545888				2008-02-09	13.4386	6.91385	-6.86169	0				2008-02-09	13.1532	10.0469	-2.22559	0
2008-02-10	0.703955	-6.45944	-10.5938	0.285968				2008-02-10	13.3229	1.17917	-9.96994	0				2008-02-10	13.3945	6.2074	-3.31152	0
2008-02-11	4.98719	-3.18603	-11.297	1.10248				2008-02-11	13.2447	8.76846	-6.66919	0				2008-02-11	9.64527	4.20453	-6.19385	0.0775728
2008-02-12	8.31598	-2.81381	-11.3633	0.027705				2008-02-12	12.7409	11.5895	0.343658	0.024724				2008-02-12	8.30639	1.40427	-8.60666	0.33073
2008-02-13	9.97392	-2.22327	-9.90982	0.0611581				2008-02-13	13.3026	12.112	0.177521	0				2008-02-13	6.94363	1.10086	-9.93567	0.135024
2008-02-14	10.9664	-4.43002	-12.2349	0.335407				2008-02-14	11.3298	8.95071	-1.94711	0				2008-02-14	9.7766	4.18295	-6.59076	0.0338051
2008-02-15	9.50129	-1.1247	-12.9165	0.0808606				2008-02-15	14.2311	8.81934	-4.50082	0				2008-02-15	13.8056	2.37058	-8.11499	0.02458
2008-02-16	14.9949	-5.6702	-16.5028	0.124308				2008-02-16	13.8123	9.25217	-1.64395	0.019912				2008-02-16	12.5288	-1.91928	-10.0244	0.0035916
2008-02-17	12.9146	-8.42365	-19.6496	0.0265379				2008-02-17	11.321	1.60373	-7.4234	0.206566				2008-02-17	14.1648	5.6503	-7.22296	0.00573015
2008-02-18	15.3196	-1.4968	-17.3598	0				2008-02-18	14.1943	5.43735	-4.23618	0				2008-02-18	13.4872	5.91836	-6.13342	0.0327099
2008-02-19	14.7668	-2.20184	-13.3415	0				2008-02-19	12.7626	6.30008	-4.82376	0				2008-02-19	11.9288	0.700012	-8.4006	0
2008-02-20	14.9064	1.7316	-14.1215	0				2008-02-20	14.6997	6.53925	-2.53113	0				2008-02-20	14.8193	4.06207	-6.95041	0
2008-02-21	16.278	-0.700836	-6.40918	0.0130632				2008-02-21	15.7919	11.1186	-1.42325	0				2008-02-21	16.7045	5.34921	-4.99954	0
2008-02-22	11.4582	0.463074	-8.54785	0.159997				2008-02-22	13.9331	16.4545	-0.873749	0				2008-02-22	15.7923	9.32538	-2.91013	0
2008-02-23	15.3207	7.20078	-5.06137	0				2008-02-23	15.1945	14.8453	-1.31354	0				2008-02-23	16.6592	20.1364	-1.11304	0
2008-02-24	15.8613	7.2214	-7.04401	0				2008-02-24	15.3641	8.97928	1.10113	0.103078				2008-02-24	13.8348	10.3731	-1.75055	0
2008-02-25	17.7059	8.86664	-6.01181	0				2008-02-25	14.3147	7.15741	-3.05099	3.47711				2008-02-25	17.1315	15.8508	0.652649	0
2008-02-26	16.5672	4.8689	-5.03137	0				2008-02-26	13.2653	6.78415	-2.91452	0				2008-02-26	10.8204	8.63049	-1.76498	0.0592292
2008-02-27	11.2473	7.24832	-5.17456	0.0354908				2008-02-27	15.7354	12.7485	-2.31158	0				2008-02-27	15.9404	9.47736	-0.445709	0.0665199
2008-02-28	16.1214	3.31668	-1.80081	0.345224				2008-02-28	12.16	3.65573	-4.38492	0.0135696				2008-02-28	11.6041	11.3201	-1.68039	0.0157344
2008-02-29	7.01082	3.31668	-1.80081	0.45002				2008-02-29	17.8791	3.65573	-4.38492	0				2008-02-29	16.9857	11.3201	-1.68039	0
2008-03-01	3.40972	3.20297	-2.83319	0.427494				2008-03-01	16.6316	12.5709	-1.49741	0				2008-03-01	18.2048	14.3629	2.81863	0
2008-03-02	17.5198	5.21533	-3.45898	0				2008-03-02	11.3363	12.1923	-0.215759	0.152348				2008-03-02	17.9175	15.5158	2.5477	0
2008-03-03	13.009	6.58347	-3.92752	0				2008-03-03	17.5905	2.85229	-5.31607	0				2008-03-03	17.8325	13.493	1.75439	0
2008-03-04	16.8911	7.51623	-5.87885	0.0101064				2008-03-04	16.1084	6.87103	-5.11459	0				2008-03-04	18.0487	16.4534	3.7381	0.00793399
2008-03-05	14.3601	5.19043	-5.87195	0.0295865				2008-03-05	18.6033	12.9427	-1.07642	0				2008-03-05	12.9546	18.068	4.01431	0
2008-03-06	14.3234	7.03723	-7.97562	0.155159				2008-03-06	17.4938	14.1796	0.0197449	0				2008-03-06	18.3252	18.8276	6.30481	0
2008-03-07	18.8589	0.780487	-10.0089	0				2008-03-07	11.1467	13.3033	1.65024	0.0298752				2008-03-07	18.4585	22.7918	8.53305	0.0561601
2008-03-08	19.47	5.04111	-6.73923	0				2008-03-08	14.6611	16.8828	0.371155	0.0424341				2008-03-08	16.2545	20.9716	-0.581451	0.171455
2008-03-09	20.1954	0.253021	-7.43906	0				2008-03-09	13.2074	14.7881	-1.15301	0.193737				2008-03-09	6.94459	4.7486	-5.28171	1.83023
2008-03-10	19.1766	7.53677	-5.50925	0				2008-03-10	7.8072	7.31216	-4.32861	0.30651				2008-03-10	15.9831	7.60773	-3.23105	0.0166148
2008-03-11	19.856	6.26767	-6.07224	0.0299235				2008-03-11	14.66	-1.30533	-9.84946	0.0812985				2008-03-11	18.0254	12.5239	0.683136	0.052653
2008-03-12	11.4565	6.80972	-4.09018	1.02715				2008-03-12	18.5524	2.07504	-9.15155	0				2008-03-12	15.7915	10.6332	0.950867	0.0341957
2008-03-13	20.2817	3.47815	-5.46036	0				2008-03-13	14.746	7.59668	-3.67706	0.0321964				2008-03-13	17.039	11.8452	0.196747	0.00787055
2008-03-14	19.1443	12.3902	-1.79565	0.0144405				2008-03-14	19.7221	11.2247	-1.31854	0				2008-03-14	20.1282	7.56717	-2.48843	0
2008-03-15	7.68473	10.6347	-0.40802	0.0268406				2008-03-15	19.4299	17.5037	3.65451	0				2008-03-15	21.1092	8.26401	-2.12546	0.010846
2008-03-16	21.6781	9.66342	-1.52588	0				2008-03-16	14.3106	11.2197	0.85495	0.0248492				2008-03-16	15.478	11.0557	-2.02118	0.058703
2008-03-17	20.9122	16.3763	0.372803	0				2008-03-17	8.20983	11.7979	1.89911	0.562538				2008-03-17	20.7112	13.4107	1.86176	0
2008-03-18	22.047	19.8471	-0.722351	0				2008-03-18	17.3763	8.42761	-1.89279	0.0458439				2008-03-18	19.5881	16.5426	2.20514	1.46256
2008-03-19	19.8785	17.6741	1.38898	0.000543629				2008-03-19	18.1911	11.1143	-0.550934	0				2008-03-19	9.31231	9.09888	2.28638	0.550497
2008-03-20	10.7105	14.3673	1.9621	0.122712				2008-03-20	16.1533	8.14484	-0.622986	0.0635997				2008-03-20	19.4507	14.3669	2.49271	0.183532
2008-03-21	12.3448	10.1524	-1.88882	0.0390597				2008-03-21	17.4512	8.56012	-1.23779	0.0493751				2008-03-21	8.45088	6.37241	-0.752228	1.85305
2008-03-22	20.9152	4.55365	-2.16809	0				2008-03-22	21.5257	14.3012	1.20007	0				2008-03-22	20.6891	5.88705	-1.33093	0.0144052
2008-03-23	20.5233	12.0818	-0.206604	0				2008-03-23	18.2696	13.1462	1.24551	0.00582656				2008-03-23	16.2829	7.54523	-1.69141	0.0731047
2008-03-24	13.6923	9.73727	0.319214	0.0648488				2008-03-24	17.425	15.1152	0.644318	0				2008-03-24	14.851	7.82382	-0.905212	0.20687
2008-03-25	21.063	13.5846	-1.24994	0.0132924				2008-03-25	18.0799	10.9185	-3.45431	0.0126076				2008-03-25	12.0271	7.88257	-2.57147	0.211697
2008-03-26	22.4782	10.3982	-1.07071	0.0160357				2008-03-26	22.1087	10.799	-2.15659	0.115197				2008-03-26	16.7435	11.5879	-1.36752	0.0303719
2008-03-27	22.5113	16.4715	1.73581	0				2008-03-27	9.11243	7.36984	-2.07773	1.95003				2008-03-27	6.54203	8.54214	-1.23209	1.95019
2008-03-28	18.828	19.1317	2.80106	0				2008-03-28	16.846	10.6884	0.638489	0.00643662				2008-03-28	14.712	6.05521	-2.59299	0.0638747
2008-03-29	20.6894	17.8884	4.33215	0.0638163				2008-03-29	20.8827	12.7865	2.1091	0				2008-03-29	22.5857	9.57178	-0.99942	0
2008-03-30	15.073	11.1001	2.8624	3.21905				2008-03-30	21.8583	14.9977	0.940582	0.0740435				2008-03-30	23.7855	13.5508	2.65244	0
2008-03-31	20.4865	11.2064	0.736725	0.0434442				2008-03-31	21.7624	8.10806	-3.7319	0				2008-03-31	23.3061	16.5616	6.06967	0
2008-04-01	24.9233	15.1995	1.68713	0				2008-04-01	24.3507	13.6022	1.07501	0				2008-04-01	22.1242	18.5864	6.73117	0.0404765
2008-04-02	23.3794	11.3608	-1.4407	0				2008-04-02	24.4084	17.8654	1.31088	0				2008-04-02	22.1524	17.6497	5.92197	0
2008-04-03	25.0806	12.7099	-0.6828	0				2008-04-03	24.754	20.7077	4.53568	0				2008-04-03	19.9518	18.1297	5.47342	0
2008-04-04	22.8952	18.3212	3.4997	0				2008-04-04	23.7956	23.0236	10.975	0.0134386				2008-04-04	21.2204	20.2322	5.47064	0
2008-04-05	20.7175	18.307	4.15237	0.0394531				2008-04-05	16.5052	20.9344	4.84061	0				2008-04-05	25.4036	17.0908	4.37515	0
2008-04-06	23.3912	15.9669	1.76767	0.0121315				2008-04-06	23.7602	19.3873	6.94232	0				2008-04-06	24.1017	19.8861	6.59821	0.0277202
2008-04-07	23.1552	12.1294	1.49844	0				2008-04-07	21.9789	25.813	11.273	0.256298				2008-04-07	23.9717	26.6793	11.9653	0
2008-04-08	21.1813	19.5236	3.16748	0.0232607				2008-04-08	17.9406	22.0989	9.03497	0.332158				2008-04-08	22.1147	27.1216	14.9184	0.0367619
2008-04-09	21.0551	11.6463	1.11252	0.93232				2008-04-09	15.6171	16.0643	4.354	0.290473				2008-04-09	11.411	17.5904	10.9289	0.764204
2008-04-10	16.603	11.5563	1.3718	0.150309				2008-04-10	15.8542	19.8826	7.94107	0.211556				2008-04-10	14.8312	19.8005	9.12283	0.419925
2008-04-11	21.3181	10.4746	0.896698	0.162311				2008-04-11	21.4941	21.8423	9.0495	0.530353				2008-04-11	19.1923	12.2472	-1.87201	0.253634
2008-04-12	25.8969	16.0792	0.90509	0.00934843				2008-04-12	18.7351	16.8871	5.23441	2.97067				2008-04-12	25.4204	10.1577	-0.604645	0
2008-04-13	20.5414	21.8954	8.12338	0.0160814				2008-04-13	6.03582	7.69443	-0.128571	1.18049				2008-04-13	25.6581	16.8823	3.3631	0
2008-04-14	16.6732	13.924	7.72623	0.0504569				2008-04-14	23.8001	12.487	0.44162	0				2008-04-14	24.3743	22.8209	8.42978	0
2008-04-15	18.8053	16.9918	2.96912	0.0202564				2008-04-15	25.6676	13.5898	-0.946869	0				2008-04-15	25.8738	24.9305	8.8107	0
2008-04-16	26.215	16.5731	3.83392	0				2008-04-16	23.6951	16.9694	4.11935	0.00106061				2008-04-16	24.359	24.7619	9.38614	0.0300419
2008-04-17	23.105	19.2785	6.14975	0				2008-04-17	27.0893	20.4636	4.90521	0				2008-04-17	18.5762	23.1562	11.2513	0.322456
2008-04-18	22.6057	23.1454	9.18866	0.107799				2008-04-18	25.1406	24.1318	10.9109	0.410744				2008-04-18	20.9931	21.4957	11.3405	0.129724
2008-04-19	21.4304	16.3888	6.26056	0				2008-04-19	23.7036	13.1915	7.59757	17.7862				2008-04-19	15.0756	16.5898	8.14591	0.015423
2008-04-20	22.6582	14.3337	4.09085	0.161915				2008-04-20	22.2667	20.384	7.59216	1.11385				2008-04-20	27.0288	17.3539	8.24643	0
2008-04-21	17.6894	5.27182	-1.13245	0.276271				2008-04-21	25.2081	23.0284	8.9064	0				2008-04-21	26.4899	21.9249	10.2985	0
2008-04-22	26.94	12.864	2.45685	0				2008-04-22	16.4957	17.6208	7.68008	0.648351				2008-04-22	22.408	23.455	11.257	0
2008-04-23	26.9425	19.6446	3.69138	0				2008-04-23	24.2851	13.7252	0.401733	1.76773				2008-04-23	24.3405	22.409	5.38974	0.031959
2008-04-24	23.331	22.3788	11.1324	1.36305				2008-04-24	24.8237	11.3378	0.768585	0.0329113				2008-04-24	25.6832	15.5964	5.74948	0
2008-04-25	22.1397	17.1466	8.49094	0.0188921				2008-04-25	26.4147	20.8981	5.67892	0.010522				2008-04-25	26.4521	18.6769	7.31311	0.0146276
2008-04-26	16.3582	16.9955	7.60196	0.03743				2008-04-26	21.2256	21.0801	8.16788	0				2008-04-26	25.7118	18.9405	8.71207	0
2008-04-27	26.423	22.2704	9.03577	0				2008-04-27	25.804	25.2612	11.8798	0				2008-04-27	22.8191	19.5552	9.84537	0
2008-04-28	24.2103	24.6939	13.2132	0				2008-04-28	22.2789	27.0773	13.1027	0				2008-04-28	28.4146	21.9102	11.118	0
2008-04-29	17.1936	14.1888	2.39789	0.378204				2008-04-29	13.9966	21.379	8.37286	0.201523				2008-04-29	27.0555	27.2599	15.5745	0
2008-04-30	22.6374	13.7057	3.27643	0.0224643				2008-04-30	27.2488	20.1145	7.40421	0.0378616				2008-04-30	26.8952	28.5147	16.6563	0
2008-05-01	18.356	21.2194	8.80765	0.0283954				2008-05-01	27.2466	21.9992	7.01834	0				2008-05-01	26.0903	28.0139	7.8793	0
2008-05-02	23.6097	25.2862	8.91263	0.144269				2008-05-02	14.2158	11.6532	1.97372	0.241242				2008-05-02	27.6642	13.7628	0.115662	0
2008-05-03	18.7163	9.87457	1.49185	0.517362				2008-05-03	27.1865	23.8617	7.83081	0				2008-05-03	27.2965	21.0587	9.23422	0
2008-05-04	30.2986	12.4863	2.18665	0				2008-05-04	26.6401	26.2253	12.0089	0				2008-05-04	26.0499	29.1504	18.4764	0
2008-05-05	25.2538	19.2894	4.66299	0				2008-05-05	12.7209	18.7348	7.12653	2.45045				2008-05-05	26.9965	29.4429	17.4827	0.0822467
2008-05-06	27.7398	21.7279	8.77872	0				2008-05-06	8.72366	8.54584	3.25449	4.19922				2008-05-06	26.1419	30.9137	17.8422	1.39816
2008-05-07	23.2623	18.8444	9.86633	0				2008-05-07	27.3705	22.2829	10.0456	0				2008-05-07	21.9801	25.9059	14.7169	0.199882
2008-05-08	23.2979	22.6094	11.7829	0				2008-05-08	26.0586	22.7822	5.00983	0.0661562				2008-05-08	21.0248	23.4203	15.4074	0.292541
2008-05-09	16.2756	23.5275	14.0691	0.68295				2008-05-09	29.502	12.294	1.37186	0				2008-05-09	26.5858	28.0725	16.916	0.218489
2008-05-10	29.3335	24.4247	13.5347	0				2008-05-10	28.6511	17.9352	6.44604	0				2008-05-10	20.9383	27.1689	14.8833	2.63971
2008-05-11	28.1571	31.7833	14.7457	0.0623192				2008-05-11	26.7991	26.3155	10.4186	0				2008-05-11	7.53852	11.957	4.54855	2.56068
2008-05-12	15.0512	16.767	10.2343	3.46453				2008-05-12	27.139	26.0361	12.7315	0.199471				2008-05-12	27.5009	19.4306	8.93594	0
2008-05-13	26.1213	20.4376	11.0615	0.0522669				2008-05-13	22.1569	25.7847	14.8028	0.234676				2008-05-13	27.7073	22.1764	11.9608	0.14869
2008-05-14	22.3586	21.8383	12.1136	0.00101052				2008-05-14	25.771	24.1855	11.8821	0.0613646				2008-05-14	20.6645	21.5367	12.3422	0
2008-05-15	22.8587	23.3373	13.161	0				2008-05-15	17.8722	23.6097	12.8332	0.10659				2008-05-15	27.3971	22.692	11.2592	0
2008-05-16	29.2273	28.5055	15.2091	0.0470075				2008-05-16	29.9042	22.006	12.8699	0				2008-05-16	27.7025	28.2325	16.4535	0.0574361
2008-05-17	26.9425	28.4182	17.6084	0.161664				2008-05-17	27.8727	24.2662	14.578	0.0250689				2008-05-17	27.5343	28.1865	18.502	0
2008-05-18	27.2126	24.9666	15.8124	0.228666				2008-05-18	11.2498	20.0421	12.8584	0.35186				2008-05-18	26.977	26.5727	15.7773	0
2008-05-19	11.6354	16.6726	10.9835	11.4479				2008-05-19	26.8716	28.1623	16.6085	0.130754				2008-05-19	23.2457	26.5257	13.7068	0
2008-05-20	17.6484	14.3844	7.5221	0.765566				2008-05-20	11.0175	20.6341	11.5821	0.244727				2008-05-20	22.2469	26.6739	17.0433	0.0499561
2008-05-21	27.7056	24.2433	8.8587	0.0332381				2008-05-21	24.5504	26.8238	14.5979	2.49786				2008-05-21	28.2052	30.3083	20.553	0.053103
2008-05-22	17.6872	20.775	11.662	0.0930144				2008-05-22	20.2352	20.0528	10.5565	0.561619				2008-05-22	23.248	27.2786	15.7953	0
2008-05-23	28.9405	21.4377	10.3557	0				2008-05-23	17.0101	18.7355	9.41479	1.03781				2008-05-23	20.8135	26.1513	16.0899	0
2008-05-24	29.8304	24.0465	12.7069	0				2008-05-24	18.766	15.2217	8.29187	0.275329				2008-05-24	27.8055	27.847	18.2575	0.0412322
2008-05-25	30.0234	27.1621	14.4746	0				2008-05-25	27.6182	18.3568	7.61124	0.178989				2008-05-25	28.6259	30.3801	20.4534	0
2008-05-26	28.7291	30.247	16.5119	0				2008-05-26	30.4932	23.7499	12.2783	0				2008-05-26	27.002	32.2265	21.2405	0.0900673
2008-05-27	26.0493	30.2077	18.1713	0.0247439				2008-05-27	24.7535	25.5123	11.8922	0				2008-05-27	26.3353	33.6942	19.6332	0.0759508
2008-05-28	22.6618	26.8052	16.9351	0.181552				2008-05-28	23.0818	24.5232	13.3186	0.250898				2008-05-28	26.9988	27.1984	14.531	0
2008-05-29	28.3751	30.7131	17.8258	0.116172				2008-05-29	17.2851	22.7161	14.1052	0.959448				2008-05-29	25.6128	22.9557	12.7088	0
2008-05-30	11.6842	21.8849	10.8147	1.68607				2008-05-30	15.5855	22.7931	13.1369	1.53701				2008-05-30	30.3072	25.1448	11.9243	0
2008-05-31	26.6585	22.7378	11.7211	0				2008-05-31	18.7107	23.6839	13.5307	1.47734				2008-05-31	28.8408	26.8043	15.5754	0
2008-06-01	26.8648	27.0562	14.8671	0.0265066				2008-06-01	28.5388	27.2829	15.9543	0.344244				2008-06-01	25.8351	27.3048	17.3977	0
2008-06-02	20.9726	27.4951	18.7478	0.621618				2008-06-02	11.5627	18.1825	11.7687	3.83264				2008-06-02	29.5047	33.3001	20.585	0
2008-06-03	4.44868	18.9525	12.7177	10.6386				2008-06-03	29.1126	20.6532	10.459	0				2008-06-03	29.5502	36.9675	22.7462	1.24371
2008-06-04	26.2913	24.5251	11.8159	0.0563246				2008-06-04	24.9874	23.4977	11.9317	0.256732				2008-06-04	28.8019	39.0035	24.6517	0.0643487
2008-06-05	27.1429	25.0473	11.1284	0.0337446				2008-06-05	28.2744	22.5516	10.4223	0				2008-06-05	13.4336	30.0449	20.8385	2.09148
2008-06-06	30.4345	23.1074	11.6803	0.105415				2008-06-06	24.6896	23.2641	12.5279	0				2008-06-06	27.5457	33.1403	20.4663	0.385877
2008-06-07	26.7281	22.4792	13.7295	0.267837				2008-06-07	14.1674	21.2582	10.482	0.176628				2008-06-07	26.9802	38.5525	22.859	0.0450726
2008-06-08	29.5635	24.2286	14.9172	0				2008-06-08	24.56	24.0498	12.5274	0.200565				2008-06-08	15.8248	27.0258	18.9044	0.373019
2008-06-09	24.6494	26.0563	15.469	0				2008-06-09	26.1032	26.6761	13.6102	0.0433422				2008-06-09	18.614	25.2799	15.1334	1.3581
2008-06-10	25.447	27.2546	17.6038	0.0729772				2008-06-10	28.4981	29.0103	18.0925	0.15014				2008-06-10	26.1745	27.1654	18.3946	0.103324
2008-06-11	25.0918	23.9679	15.9141	0				2008-06-11	24.7075	28.5073	16.0884	0.455282				2008-06-11	21.817	27.598	17.7571	2.11133
2008-06-12	30.4046	26.6647	14.693	0				2008-06-12	20.9941	28.8416	16.8291	0.445711				2008-06-12	25.0204	29.7527	20.2719	0.855379
2008-06-13	27.2033	26.4308	16.4501	0.0986955				2008-06-13	14.6638	24.9268	16.3988	2.94431				2008-06-13	12.5033	23.2719	14.5473	4.38071
2008-06-14	28.4841	28.9706	17.2705	0				2008-06-14	28.1962	28.8256	18.6087	0				2008-06-14	28.2528	21.1863	13.8988	0
2008-06-15	26.6773	30.6742	18.0849	0				2008-06-15	27.8255	30.0278	18.6391	0.114201				2008-06-15	27.7694	23.2922	15.5126	0
2008-06-16	30.2892	32.5827	20.3685	0				2008-06-16	23.5042	27.9189	18.9789	0				2008-06-16	28.8	30.5503	19.4226	0
2008-06-17	28.3827	32.7589	21.4641	0				2008-06-17	19.733	26.4031	17.2525	0.321079				2008-06-17	26.6338	29.0211	17.1959	0.0326029
2008-06-18	19.444	30.6863	21.7386	0.579359				2008-06-18	10.6031	23.9546	17.2718	35.3452				2008-06-18	28.2082	30.7455	20.2986	0.0197885
2008-06-19	4.00345	22.7852	12.429	2.5709				2008-06-19	15.9192	21.2794	17.2156	1.04419				2008-06-19	23.4237	31.6501	20.964	0.288099
2008-06-20	23.9932	23.662	13.8791	0.151209				2008-06-20	23.9359	27.5756	14.875	0.636722				2008-06-20	24.1344	32.6309	20.9075	0
2008-06-21	26.7745	29.4047	21.1703	0.0456068				2008-06-21	29.497	31.1611	16.7652	0.250715				2008-06-21	22.3719	30.6898	20.327	0.158176
2008-06-22	15.9814	27.5614	16.2739	2.56027				2008-06-22	16.0507	27.051	15.8544	0.60999				2008-06-22	24.9199	31.2032	20.0112	0.300149
2008-06-23	10.2881	18.0774	14.0969	0.749602				2008-06-23	18.2358	23.5155	15.6685	0.320966				2008-06-23	28.7703	34.6111	22.0958	0.0338563
2008-06-24	16.1535	22.3405	14.6646	1.66482				2008-06-24	22.3026	26.1047	13.8864	0.204887				2008-06-24	24.7419	32.2479	19.4147	0
2008-06-25	18.5357	20.0564	12.7575	2.78784				2008-06-25	26.9744	28.4062	17.7585	0.46697				2008-06-25	24.6679	30.2666	18.8048	0.102982
2008-06-26	26.4556	24.9888	15.1715	0.109075				2008-06-26	20.0086	25.7726	16.0378	0.13193				2008-06-26	26.9292	32.8559	14.8102	0
2008-06-27	24.6894	25.8086	16.1027	0				2008-06-27	18.9854	24.599	17.0164	0.300257				2008-06-27	28.1201	34.544	22.7547	0
2008-06-28	25.4805	29.2457	18.2974	0.0952423				2008-06-28	20.45	26.1081	17.1582	2.13608				2008-06-28	28.2169	36.1413	23.946	0
2008-06-29	26.1096	29.3796	18.9145	0.0828621				2008-06-29	23.8156	27.5234	17.3326	1.00175				2008-06-29	23.9427	37.6575	25.2483	0.0916891
2008-06-30	29.5441	31.2051	20.5139	0.0178953				2008-06-30	29.5176	32.458	19.6748	0.0776637				2008-06-30	28.0221	38.5982	25.8103	0
2008-07-01	29.2705	33.257	21.5301	0				2008-07-01	25.6774	31.2148	20.1178	0.178497				2008-07-01	28.2917	37.7238	23.9253	0
2008-07-02	27.761	32.4081	20.5638	0				2008-07-02	12.1504	23.0008	15.716	7.14382				2008-07-02	20.3798	29.4128	21.4422	0.249464
2008-07-03	24.3163	30.6676	20.9455	0.136597				2008-07-03	24.1934	25.5541	16.6869	0.658354				2008-07-03	14.879	27.5397	18.5974	0.134829
2008-07-04	16.1871	27.8128	21.3803	1.41987				2008-07-04	18.495	28.5818	17.909	1.40081				2008-07-04	23.5822	30.8134	21.1744	0
2008-07-05	6.40888	22.8766	20.7827	1.15891				2008-07-05	24.836	31.5517	20.5344	0				2008-07-05	28.0108	35.1288	23.8292	0
2008-07-06	17.348	24.7229	19.4188	1.95049				2008-07-06	19.7396	29.9328	17.1644	0				2008-07-06	22.1822	33.2824	23.8205	3.67895
2008-07-07	20.4009	28.8413	21.2046	3.4127				2008-07-07	28.5682	31.7309	20.2569	0				2008-07-07	12.225	25.1183	19.4896	16.2086
2008-07-08	18.0651	28.1716	18.2189	1.44412				2008-07-08	26.2995	31.0291	18.1626	0				2008-07-08	10.0166	25.2807	17.9898	9.85651
2008-07-09	26.783	28.3817	18.5875	0.180165				2008-07-09	27.498	29.8198	18.8922	0				2008-07-09	10.1313	20.4049	15.5503	0.124608
2008-07-10	29.2786	31.449	19.915	0				2008-07-10	27.5469	30.0624	18.728	0.100321				2008-07-10	29.2846	27.3814	18.6878	0.10701
2008-07-11	12.6547	31.0257	20.3127	2.26162				2008-07-11	18.5418	29.6157	17.7584	0.271329				2008-07-11	28.492	27.1029	17.3394	0.130141
2008-07-12	6.66693	21.1917	18.6371	13.4242				2008-07-12	24.5828	31.8677	17.5067	0				2008-07-12	28.064	29.3069	21.0614	0
2008-07-13	19.679	27.3706	18.2156	0.0462695				2008-07-13	25.7742	31.265	19.3425	0.0919283				2008-07-13	28.8261	31.8567	19.3129	0
2008-07-14	27.4718	31.7428	20.1664	0				2008-07-14	25.3711	28.2447	19.8122	0.606926				2008-07-14	26.8072	29.503	18.9482	0
2008-07-15	26.5393	31.3352	20.9023	0				2008-07-15	25.4577	29.3363	20.7688	0.00475644				2008-07-15	28.4175	30.1541	16.2972	0
2008-07-16	26.6684	30.505	22.1062	0				2008-07-16	26.1097	31.7253	21.735	0				2008-07-16	27.8248	32.1621	18.7559	0
2008-07-17	25.5598	29.0494	19.0126	0.369925				2008-07-17	17.1792	28.7711	20.9117	0.489737				2008-07-17	28.1906	32.6279	20.3919	0
2008-07-18	25.988	29.9466	19.1837	0.0291614				2008-07-18	18.5407	26.886	18.7324	11.959				2008-07-18	28.0277	34.0913	22.664	0.13218
2008-07-19	27.147	30.7344	21.4169	0.0275493				2008-07-19	3.53267	22.3237	15.9468	19.9501				2008-07-19	26.4931	35.2735	17.8273	0
2008-07-20	22.3379	31.5928	21.9037	0.0141501				2008-07-20	28.9994	31.2978	20.3022	0.0191737				2008-07-20	29.1512	38.2957	25.9438	0
2008-07-21	18.6282	28.8365	20.8787	1.61193				2008-07-21	13.5533	26.2659	17.0679	0.281192				2008-07-21	29.0039	40.6648	27.3234	0
2008-07-22	17.6572	29.3581	22.0896	0.104245				2008-07-22	24.4176	29.3674	20.9457	0				2008-07-22	25.7175	39.813	23.8206	0.0594858
2008-07-23	22.226	30.7636	22.4217	0.500862				2008-07-23	23.4553	31.6669	20.6853	0.711426				2008-07-23	27.4026	38.9092	27.4269	0
2008-07-24	23.711	29.8827	19.5258	0.16781				2008-07-24	11.9597	25.511	18.7178	2.64871				2008-07-24	26.4055	38.3654	27.5328	0
2008-07-25	28.1722	30.9857	19.5681	0.0497643				2008-07-25	26.5534	31.7277	21.3732	0.10147				2008-07-25	13.1116	33.7497	25.2088	0.0548369
2008-07-26	27.7065	33.5847	18.9517	0				2008-07-26	19.724	33.5517	22.3674	0				2008-07-26	25.2894	36.5686	21.7697	0.742036
2008-07-27	26.3552	31.5996	18.3669	0.612242				2008-07-27	19.843	33.4619	20.7016	0.0699865				2008-07-27	27.346	34.7502	20.1543	0
2008-07-28	25.8483	31.607	18.8762	0.0259309				2008-07-28	26.7379	33.1829	19.8033	0				2008-07-28	28.2687	37.0487	23.3409	0
2008-07-29	27.5158	32.2284	20.9995	0				2008-07-29	24.5208	23.7953	14.7375	0.68136				2008-07-29	28.7625	39.3907	26.8873	0
2008-07-30	18.9613	31.398	24.1239	1.91148				2008-07-30	22.7804	21.2171	9.58554	1.3758				2008-07-30	28.6139	41.8037	25.5001	0
2008-07-31	6.64029	24.6704	17.6975	9.61816				2008-07-31	28.6547	23.2493	12.8619	0				2008-07-31	28.8731	41.323	22.6408	0
2008-08-01	25.5615	27.1252	19.6005	0.40017				2008-08-01	28.7447	29.22	17.7593	0				2008-08-01	27.7845	39.4354	24.9427	0
2008-08-02	18.8569	26.7227	19.583	0.688577				2008-08-02	26.2133	31.3943	20.5919	0				2008-08-02	26.9126	42.1212	27.6235	0
2008-08-03	20.3283	27.9811	20.917	0.953092				2008-08-03	9.53368	30.0197	21.0956	0.766772				2008-08-03	22.1751	36.4992	25.9639	0.248658
2008-08-04	23.0212	28.306	21.7896	0				2008-08-04	23.0751	29.6408	21.9743	0.395475				2008-08-04	23.9514	35.675	24.6984	1.67865
2008-08-05	25.7823	30.0411	20.3958	0				2008-08-05	15.8486	28.7695	20.2255	0.241494				2008-08-05	15.5431	24.5264	18.7226	0.448804
2008-08-06	25.2568	31.1974	21.3833	0				2008-08-06	15.1628	27.2411	18.8518	0.779198				2008-08-06	13.6579	19.7934	15.4285	9.86203
2008-08-07	17.7326	28.1665	23.0371	0.468862				2008-08-07	25.7216	31.0473	20.9834	0.0387609				2008-08-07	11.5568	17.4405	12.594	5.18713
2008-08-08	5.24553	22.5693	16.877	1.28999				2008-08-08	16.0234	25.7112	18.7152	0.343135				2008-08-08	26.201	25.3875	16.0844	0
2008-08-09	7.52192	18.8791	12.9847	2.40941				2008-08-09	22.2473	27.1075	18.3549	0.457121				2008-08-09	28.2344	29.0113	16.856	0
2008-08-10	11.827	19.6985	12.4643	2.00088				2008-08-10	20.6835	24.5173	16.0169	2.16089				2008-08-10	26.9463	31.1441	18.0117	0
2008-08-11	23.3681	27.917	14.0585	0.499823				2008-08-11	11.935	20.6632	14.9801	1.78581				2008-08-11	26.3456	30.8994	18.1839	0.10373
2008-08-12	11.6071	22.8609	20.0468	0.523953				2008-08-12	16.6018	20.0574	14.3399	0.624876				2008-08-12	26.7986	32.267	19.5353	0
2008-08-13	22.8152	28.2772	21.43	0.375113				2008-08-13	18.1651	23.7436	17.6021	1.08144				2008-08-13	27.178	35.0696	21.557	0
2008-08-14	19.6702	31.3906	21.2025	0.648484				2008-08-14	21.2259	28.1288	18.8581	0.349494				2008-08-14	21.027	33.3517	20.8712	11.4839
2008-08-15	20.0599	30.58	21.5515	1.22487				2008-08-15	21.0305	28.4634	20.5415	1.7467				2008-08-15	10.2118	24.0945	16.3585	5.90375
2008-08-16	12.5284	21.7711	18.0082	4.58982				2008-08-16	22.0965	29.789	20.0356	1.66355				2008-08-16	24.3542	29.1127	16.3934	0
2008-08-17	23.7906	28.2666	18.7072	0.159034				2008-08-17	22.8299	29.1774	19.4818	0.388336				2008-08-17	24.2099	30.5327	19.2987	0
2008-08-18	19.0311	28.9522	19.7446	0.456674				2008-08-18	19.7777	28.2585	18.9232	2.142				2008-08-18	25.0356	36.7057	21.2302	0
2008-08-19	23.8138	29.8986	20.4455	0.0115145				2008-08-19	14.6316	27.1469	19.1473	0.406761				2008-08-19	20.2494	34.3148	21.9611	0.0852564
2008-08-20	13.5216	25.8569	19.4298	1.74439				2008-08-20	17.2506	29.242	18.6368	0.319482				2008-08-20	20.2362	30.3532	19.5491	0.163292
2008-08-21	18.4981	25.157	17.1193	3.58133				2008-08-21	21.0304	29.9978	20.4721	0.267334				2008-08-21	13.2984	27.0564	18.8827	0.273805
2008-08-22	25.2974	25.4152	17.2761	0.158183				2008-08-22	14.6335	25.4017	16.4522	0.247667				2008-08-22	16.9169	30.2693	18.5048	0.112176
2008-08-23	22.2776	25.3742	16.2152	0.184079				2008-08-23	15.5517	24.4589	16.7594	0.40803				2008-08-23	22.9598	32.3756	20.9217	0.167907
2008-08-24	14.505	21.3205	17.0026	9.59443				2008-08-24	22.6019	27.7371	18.0309	0.340052				2008-08-24	21.5875	32.5157	22.8319	1.02404
2008-08-25	6.51619	20.4408	17.1907	5.83223				2008-08-25	22.9095	27.2947	18.0102	0.0286395				2008-08-25	15.3937	29.3056	18.7569	0.650191
2008-08-26	14.8652	21.2753	15.7177	0.481896				2008-08-26	19.5833	26.5818	17.4474	0.74748				2008-08-26	25.36	32.05	18.6382	0
2008-08-27	19.2863	22.5436	15.9303	0.301788				2008-08-27	23.6225	30.2463	19.5199	0.435804				2008-08-27	24.1693	32.9161	17.2246	0.413365
2008-08-28	20.966	25.6079	16.232	0.945755				2008-08-28	16.8093	27.407	17.7079	1.72355				2008-08-28	17.3253	22.2237	11.4691	0.117054
2008-08-29	25.2969	27.5976	16.9855	0				2008-08-29	22.2559	30.2186	18.8892	0.162865				2008-08-29	24.7924	28.0667	15.8467	0
2008-08-30	22.7875	28.8736	17.6426	0				2008-08-30	16.2261	27.7283	17.8691	2.44228				2008-08-30	22.5025	30.1653	18.7205	0
2008-08-31	23.4383	27.8386	17.9416	0				2008-08-31	19.663	27.6892	17.285	0.0919596				2008-08-31	16.4495	25.9224	17.5902	0.504808
2008-09-01	20.538	27.3514	18.7795	0.205001				2008-09-01	17.6995	25.9235	15.1199	0				2008-09-01	16.2422	26.3184	17.9635	0.269354
2008-09-02	19.8615	24.2501	15.6029	0.219235				2008-09-02	18.0444	23.0357	16.2091	0				2008-09-02	20.442	25.9289	14.8654	0.133436
2008-09-03	21.3614	25.2472	16.1415	0.0695858				2008-09-03	16.9648	25.6988	14.9179	0				2008-09-03	23.1125	29.0327	16.1011	0
2008-09-04	21.9489	26.9845	16.9754	0.0883507				2008-09-04	23.1678	27.9381	14.9001	0				2008-09-04	23.1998	31.0684	15.3564	0
2008-09-05	20.0479	27.8329	18.4882	0				2008-09-05	20.3994	26.1205	15.7645	0.107383				2008-09-05	23.9875	29.6484	16.2018	0.0667346
2008-09-06	12.6861	25.6216	14.499	6.22077				2008-09-06	16.9161	25.4528	16.5819	0				2008-09-06	17.4597	31.4686	14.2631	0.0561798
2008-09-07	1.01847	15.9389	10.4018	5.44453				2008-09-07	20.8053	23.3274	14.3044	0.231194				2008-09-07	22.1836	30.8506	14.3054	0.103429
2008-09-08	14.5582	19.3532	12.1761	0.0419664				2008-09-08	22.0498	24.6461	14.0588	0.0729761				2008-09-08	24.3513	34.9859	12.295	0
2008-09-09	22.0144	24.1428	13.3069	0				2008-09-09	20.8754	27.3603	16.9542	0.139103				2008-09-09	23.0207	34.3218	16.7679	0
2008-09-10	16.8067	22.8401	12.5669	0.0251007				2008-09-10	20.7408	29.7199	18.9136	0.0469502				2008-09-10	21.9502	33.3379	16.5678	0.0087177
2008-09-11	21.7375	23.8859	13.1002	0.317144				2008-09-11	14.6344	24.3066	13.1797	0				2008-09-11	23.9898	33.1014	17.7562	0
2008-09-12	21.1024	25.5086	14.952	0.00951573				2008-09-12	15.7058	26.4696	14.2702	0.540395				2008-09-12	23.2229	37.4487	16.4045	0
2008-09-13	13.9084	23.4045	16.5359	0.0560693				2008-09-13	20.3803	25.5719	12.994	0.138703				2008-09-13	21.6019	35.327	19.7871	0
2008-09-14	20.0649	26.0036	14.7429	0.634272				2008-09-14	17.9041	26.5151	14.368	0				2008-09-14	21.0484	30.6493	12.4511	0.0166486
2008-09-15	13.2586	19.8637	13.5403	0.347017				2008-09-15	20.0669	29.8863	16.5031	0.105253				2008-09-15	21.2718	24.0993	11.8916	0
2008-09-16	5.14313	15.8136	12.3887	2.53723				2008-09-16	7.567	21.7122	12.2077	11.908				2008-09-16	18.5023	27.4386	14.0871	0.399315
2008-09-17	8.50834	18.5243	9.95895	0.356497				2008-09-17	12.2906	19.7385	7.00174	0				2008-09-17	19.3722	28.0921	15.962	0.641069
2008-09-18	11.3716	16.7825	9.35782	0.474366				2008-09-18	15.0076	23.4698	11.9979	0.108789				2008-09-18	16.4385	24.2954	13.5727	2.34737
2008-09-19	20.242	22.9508	10.1356	0				2008-09-19	17.0948	20.3482	8.32541	0.0933175				2008-09-19	20.624	26.6096	14.6094	0.263892
2008-09-20	18.32	22.849	12.9046	0.0243028				2008-09-20	21.9794	13.7428	4.31564	0				2008-09-20	20.9949	27.9812	13.5731	0.141312
2008-09-21	20.2728	24.5496	13.3662	0				2008-09-21	21.3863	21.3691	8.31924	0				2008-09-21	21.0252	26.1055	14.3015	1.0798
2008-09-22	20.3611	25.1277	14.6653	0				2008-09-22	18.9999	23.3298	9.95151	0				2008-09-22	6.99047	15.685	9.59586	13.0923
2008-09-23	12.046	21.463	9.95709	1.35754				2008-09-23	19.141	26.9146	12.1192	0				2008-09-23	20.5116	18.2114	5.91894	0
2008-09-24	10.453	16.8227	7.98514	0.35671				2008-09-24	8.11767	19.4618	9.6048	0.0427102				2008-09-24	20.9489	20.6182	10.0376	0
2008-09-25	16.4716	21.9517	9.19742	2.29212				2008-09-25	15.4116	22.5865	9.37442	0.315308				2008-09-25	11.8976	20.3567	11.3827	1.76074
2008-09-26	18.4901	19.5782	11.0672	0				2008-09-26	17.0309	24.8518	9.20538	0.256791				2008-09-26	6.07976	19.8824	10.6158	1.37655
2008-09-27	18.6878	24.0973	11.7834	0				2008-09-27	19.7803	24.1273	11.6003	0				2008-09-27	11.342	23.8714	9.00256	2.91212
2008-09-28	18.8801	25.0227	12.3469	0.0116554				2008-09-28	15.8309	28.3503	14.0747	0.729329				2008-09-28	19.9991	13.6512	2.86261	0
2008-09-29	10.202	16.9508	7.04678	0.586164				2008-09-29	4.28241	13.7323	7.03671	1.58243				2008-09-29	18.2105	18.7725	4.76929	0
2008-09-30	17.1284	17.0504	7.11096	0				2008-09-30	8.15583	14.4166	4.59381	0.624753				2008-09-30	18.8093	21.8065	5.28699	0
2008-10-01	19.8789	20.4425	8.47971	0.0149833				2008-10-01	18.6974	21.287	6.43884	0				2008-10-01	19.4998	15.3339	2.53647	0
2008-10-02	19.1687	22.2241	8.02188	0.0830455				2008-10-02	17.8426	21.2	7.59201	0				2008-10-02	18.8177	17.3454	5.88489	0
2008-10-03	19.9078	24.6733	9.60254	0				2008-10-03	13.0811	17.4377	5.16528	0.266253				2008-10-03	18.4011	19.2956	7.01914	0.140269
2008-10-04	19.1447	25.0505	10.8753	0				2008-10-04	7.60921	11.9199	4.07059	4.34936				2008-10-04	13.4698	17.0804	7.13455	0.328208
2008-10-05	18.5163	26.9895	11.337	0				2008-10-05	8.29218	11.7837	1.6965	0.976469				2008-10-05	17.1	22.105	8.84964	0.000359884
2008-10-06	17.7403	25.6515	10.8734	0.0166486				2008-10-06	18.411	18.5293	3.39844	0.0638157				2008-10-06	16.9309	23.6787	11.9675	0.145033
2008-10-07	10.927	16.6542	7.21988	0.947975				2008-10-07	17.6754	23.3437	5.12863	0				2008-10-07	13.7878	21.8193	6.04019	0.324979
2008-10-08	18.2581	23.6894	7.04184	0				2008-10-08	17.554	26.0981	9.59189	0				2008-10-08	17.6308	21.3762	7.62918	0.00356129
2008-10-09	17.1075	27.013	13.5426	0				2008-10-09	17.0319	27.7416	13.1349	0				2008-10-09	10.9701	17.5274	8.4256	7.99243
2008-10-10	14.1532	26.8158	3.62625	5.24829				2008-10-10	10.6095	23.3255	11.4818	4.88802				2008-10-10	6.1781	15.5885	7.43231	2.35926
2008-10-11	11.4058	5.64859	0.851532	0.38516				2008-10-11	12.6303	18.5389	6.7616	15.1492				2008-10-11	4.86627	17.5378	8.4238	1.52533
2008-10-12	13.5728	12.2684	2.35312	0.0178347				2008-10-12	12.6554	7.26239	-0.113709	0.532606				2008-10-12	8.6643	15.3361	5.83954	0.320099
2008-10-13	13.4879	13.1094	5.62109	0.177676				2008-10-13	17.4711	11.2319	1.4606	0				2008-10-13	16.5005	23.9899	9.63297	0
2008-10-14	13.0127	15.5307	2.66672	0				2008-10-14	16.1038	17.5535	4.29144	0				2008-10-14	13.9592	17.1796	5.62085	3.45139
2008-10-15	7.64326	7.09518	-0.343323	4.70947				2008-10-15	15.657	22.7827	9.17609	0.212323				2008-10-15	14.3975	15.1715	2.04114	0
2008-10-16	12.5875	8.19937	-0.861206	0.389773				2008-10-16	12.3374	12.8714	3.38119	0.28169				2008-10-16	16.794	16.0626	4.74579	0.325053
2008-10-17	15.423	13.3888	1.48056	0.248071				2008-10-17	16.2406	17.9315	3.29224	0				2008-10-17	12.8669	17.5132	5.5433	0.0601594
2008-10-18	11.0637	11.5057	2.74744	0.154687				2008-10-18	15.763	18.2966	3.40143	0				2008-10-18	8.06096	14.0883	2.00293	0.493536
2008-10-19	11.3637	12.8733	3.47006	0.195527				2008-10-19	14.2563	19.4928	3.78101	0				2008-10-19	15.8508	14.9715	2.19183	0
2008-10-20	5.91291	9.07993	6.08252	0.507279				2008-10-20	15.1511	21.2538	4.64163	0				2008-10-20	13.8065	18.984	2.13708	0
2008-10-21	6.8514	10.4554	3.95679	0.164259				2008-10-21	15.312	23.064	4.49701	0.111742				2008-10-21	15.2207	20.4194	3.72699	0.258137
2008-10-22	12.3312	12.8589	3.37634	0.356493				2008-10-22	15.2224	23.3146	5.88565	0				2008-10-22	6.7356	0.575989	-6.02872	1.29203
2008-10-23	13.4557	15.0588	5.86142	0.18081				2008-10-23	8.68177	14.858	2.89789	0.505969				2008-10-23	12.2465	2.17947	-9.69488	0.0796056
2008-10-24	9.77404	12.1191	5.45511	0.152522				2008-10-24	13.3406	16.0309	2.50497	0.0360292				2008-10-24	13.5397	5.61783	-6.78192	0.0176624
2008-10-25	7.97553	9.83051	6.18591	0.541358				2008-10-25	9.79167	16.8536	6.06027	1.35915				2008-10-25	15.0322	11.9488	-3.42691	0.0354578
2008-10-26	10.6077	10.0922	2.49805	0.115157				2008-10-26	13.2903	19.5891	8.0693	0.461229				2008-10-26	14.9087	15.9248	0.32251	0.0282582
2008-10-27	13.7371	13.6171	0.810577	0				2008-10-27	5.28603	15.8588	4.30218	1.14581				2008-10-27	13.8834	15.411	-0.468628	0
2008-10-28	11.2846	14.0899	3.59345	0.42142				2008-10-28	11.9823	14.3314	0.941254	0.211199				2008-10-28	12.3982	14.8235	-1.52859	0.0063368
2008-10-29	5.6772	10.5019	1.93597	0.929014				2008-10-29	12.2333	16.6977	4.43149	0				2008-10-29	14.5713	17.3557	1.33356	0
2008-10-30	14.37	8.51016	-0.914581	0				2008-10-30	13.0874	18.7742	3.2236	0				2008-10-30	14.0657	11.4151	-0.082428	0
2008-10-31	15.13	10.2687	-1.84656	0				2008-10-31	11.0029	16.0207	3.71326	0				2008-10-31	14.2057	14.7688	-1.01385	0
2008-11-01	14.3163	11.4259	-1.9953	0				2008-11-01	10.8543	17.2927	1.90607	0				2008-11-01	14.0217	16.9731	3.27683	0
2008-11-02	13.2792	15.8294	-0.797699	0				2008-11-02	13.0205	16.6249	2.67877	0.0402266				2008-11-02	13.675	18.5119	3.64584	0
2008-11-03	12.8681	17.6267	2.80228	0.0185819				2008-11-03	11.4414	14.2376	0.283844	0.198408				2008-11-03	8.75671	15.756	1.87573	0.0203141
2008-11-04	6.14271	8.3042	-0.175903	0.545912				2008-11-04	11.8689	7.80194	-3.97116	0.14636				2008-11-04	11.1865	14.2915	-0.284821	0.0182617
2008-11-05	13.0798	11.8788	-0.657745	0				2008-11-05	10.1882	6.99005	-6.35904	0				2008-11-05	5.52305	12.2138	2.55475	0.42816
2008-11-06	12.5692	11.9984	-0.829224	0				2008-11-06	11.4058	10.3773	-1.57773	1.56378				2008-11-06	0.0460069	9.40298	2.86368	5.45999
2008-11-07	12.7147	8.44305	-2.13892	0				2008-11-07	5.51583	6.34821	-2.04239	1.12347				2008-11-07	8.81306	9.94186	0.54068	0.0408748
2008-11-08	12.0528	12.0447	-2.54968	0				2008-11-08	8.93476	4.00473	-4.64841	0.0398657				2008-11-08	12.5707	12.048	0.732605	0
2008-11-09	11.5162	15.5412	0.152069	0				2008-11-09	12.5339	10.1248	-4.50287	0				2008-11-09	12.3465	9.32617	-0.334473	0
2008-11-10	11.7737	14.5988	5.47299	0.002177				2008-11-10	3.96589	8.33466	-0.900146	0				2008-11-10	12.8323	11.3557	0.21225	0
2008-11-11	11.482	12.6898	0.206787	0				2008-11-11	11.5276	12.1047	0.528198	0				2008-11-11	12.1109	13.7934	0.572967	0
2008-11-12	12.0917	16.2251	0.563538	0				2008-11-12	4.80738	4.89771	-5.50272	0.565288				2008-11-12	7.51725	11.1831	0.398346	0.0245925
2008-11-13	11.1717	14.2339	1.50424	0.0176985				2008-11-13	11.8897	8.63236	-6.55472	0				2008-11-13	3.04438	7.64417	-0.0102234	2.03503
2008-11-14	5.86658	7.34094	0.801331	0.0422661				2008-11-14	11.5668	7.88657	-3.62878	0				2008-11-14	11.8639	8.93738	0.0135498	0
2008-11-15	2.20626	2.77463	-2.05347	0.169125				2008-11-15	10.726	5.10693	-3.76895	0				2008-11-15	9.59314	12.2642	0.144501	0
2008-11-16	11.8724	6.74875	-1.9585	0				2008-11-16	9.30172	8.7558	-2.34866	0				2008-11-16	11.3239	4.12265	-2.79584	0.0201283
2008-11-17	10.5204	8.11862	-0.459198	0				2008-11-17	10.0099	8.49301	-2.03565	0				2008-11-17	11.5254	4.87237	-3.41861	0
2008-11-18	9.47351	7.9722	-0.557983	0				2008-11-18	11.3738	5.52298	-2.97427	0				2008-11-18	11.4517	8.92294	-3.05655	0
2008-11-19	10.7783	10.9567	-1.54102	0				2008-11-19	11.1083	5.35019	-5.05075	0				2008-11-19	11.341	2.45837	-5.19574	0
2008-11-20	9.34511	10.9703	-0.043335	0.0143884				2008-11-20	10.5107	8.7554	-4.07425	0.0761374				2008-11-20	11.2794	5.25665	-3.84885	0
2008-11-21	10.8671	9.76639	0.737	0				2008-11-21	3.96936	4.81085	-3.0361	0.138609				2008-11-21	11.2297	8.34552	-1.8118	0
2008-11-22	10.4809	10.5198	-0.371063	0				2008-11-22	10.0003	2.75494	-4.05713	0.379326				2008-11-22	10.6128	9.81857	-0.765594	0
2008-11-23	10.6378	10.2373	-0.888367	0.0159966				2008-11-23	4.78933	1.24442	-7.28033	0.79852				2008-11-23	11.1255	9.22299	-1.11645	0
2008-11-24	8.71052	9.51428	-1.71011	1.99448				2008-11-24	4.79764	-0.394531	-8.43051	0.835097				2008-11-24	10.8962	9.52368	-1.47507	0
2008-11-25	10.0894	10.3594	-1.67239	0.0248834				2008-11-25	9.71411	-0.196838	-8.22702	0.0344341				2008-11-25	10.4008	7.46707	-1.12015	0
2008-11-26	6.82833	6.20526	-3.46143	0.0477559				2008-11-26	10.7636	-0.603607	-8.39059	0				2008-11-26	7.86659	6.26166	-2.05655	0.0558608
2008-11-27	10.72	-0.598236	-5.12735	0				2008-11-27	10.7011	-0.337311	-8.82275	0				2008-11-27	8.52558	7.75827	-1.43677	0.0233125
2008-11-28	10.3842	6.44824	-2.86261	0				2008-11-28	10.4428	1.24808	-8.20203	0				2008-11-28	10.2331	10.3575	-0.479431	0
2008-11-29	9.99906	6.46149	-1.76868	0				2008-11-29	10.3823	0.403687	-8.62439	0				2008-11-29	10.3496	12.1209	0.812225	0
2008-11-30	9.75288	7.39566	-2.26541	0.0080244				2008-11-30	10.2772	2.14774	-9.06058	0				2008-11-30	10.07	13.0735	1.64688	0.0216754
2008-12-01	5.20238	-0.335571	-6.81088	0.389633				2008-12-01	10.2223	6.58881	-5.4386	0				2008-12-01	8.10224	12.7211	1.14676	0.0120625
2008-12-02	5.81366	-0.670898	-7.94516	0.0259292				2008-12-02	9.09549	6.7395	-2.31824	0				2008-12-02	6.09549	4.84451	-2.36716	0.114793
2008-12-03	3.91882	-0.126556	-7.65076	0.456995				2008-12-03	7.43744	8.42648	-3.53073	0				2008-12-03	3.92469	1.30017	-5.14578	0.0706482
2008-12-04	8.09137	-0.0487366	-15.5282	0.00669711				2008-12-04	6.15444	4.49133	-4.02234	0				2008-12-04	5.92813	-0.123352	-7.62875	0.00231293
2008-12-05	9.6141	-3.13617	-15.7217	0				2008-12-05	5.5085	2.87387	-6.60583	0.105026				2008-12-05	9.35404	-0.393036	-8.55707	0.0099281
2008-12-06	9.99464	3.38003	-9.43207	0				2008-12-06	2.96015	-4.65521	-13.5148	0.262268				2008-12-06	9.88133	2.39545	-7.36368	0.0444002
2008-12-07	9.84098	5.97406	-6.84994	0				2008-12-07	10.1731	-5.73117	-14.3202	0				2008-12-07	7.15571	2.95081	-5.30725	0.0183698
2008-12-08	8.5777	2.81836	-7.55194	0.010531				2008-12-08	7.70425	-3.952	-12.856	0.0141818				2008-12-08	9.28089	4.47546	-5.38455	0
2008-12-09	7.57326	-0.371948	-12.1327	0				2008-12-09	6.81649	-3.85129	-12.9801	0.142315				2008-12-09	8.43136	2.01999	-6.38711	0.023989
2008-12-10	10.3818	-1.12766	-12.4764	0				2008-12-10	8.29421	0.0258484	-10.7942	1.30298				2008-12-10	6.16563	-7.03638	-16.5518	0.0326456
2008-12-11	9.81917	2.03586	-10.498	0				2008-12-11	8.52458	2.18109	-6.57028	0.0351508				2008-12-11	10.3573	-3.68613	-17.7022	0
2008-12-12	8.94157	0.133514	-10.3908	0				2008-12-12	9.16537	3.21188	-6.14417	0.0170517				2008-12-12	9.15677	1.82584	-9.8804	0
2008-12-13	9.1797	3.21771	-8.69614	0				2008-12-13	9.48657	2.52335	-8.06592	0				2008-12-13	7.51879	-0.0550232	-9.86383	0
2008-12-14	6.30701	2.89194	-7.43527	0.0202385				2008-12-14	9.22978	4.39575	-8.48013	0				2008-12-14	8.15397	-2.32196	-11.3857	0
2008-12-15	7.26607	3.3038	-5.86417	0.0105629				2008-12-15	9.04524	1.84799	-8.1138	0				2008-12-15	8.47531	-2.6167	-10.8833	0
2008-12-16	7.23729	4.26016	-4.28952	0				2008-12-16	9.22841	2.94568	-9.66483	0				2008-12-16	9.89335	1.42606	-9.46976	0
2008-12-17	9.20441	3.87387	-6.80692	0				2008-12-17	8.79102	-2.66248	-15.4837	0				2008-12-17	9.53106	0.551148	-9.95087	0
2008-12-18	9.09194	1.43256	-8.29703	0				2008-12-18	9.39411	-6.87589	-17.933	0.0150195				2008-12-18	9.10725	-1.0582	-11.1746	0
2008-12-19	8.15167	5.20792	-3.54694	0				2008-12-19	9.60355	-1.39398	-14.7386	0				2008-12-19	9.46535	3.64645	-8.73538	0
2008-12-20	8.60739	7.41013	-2.56705	0				2008-12-20	8.69398	4.81293	-8.44336	0				2008-12-20	8.55877	2.8866	-3.97174	0
2008-12-21	8.40369	5.02811	-3.54535	0				2008-12-21	8.94636	3.7468	-8.81427	0				2008-12-21	6.75259	-3.77344	-17.2335	0
2008-12-22	8.35459	8.46802	-3.59766	0				2008-12-22	5.67973	0.0797729	-10.6631	0.508951				2008-12-22	9.87895	-6.94949	-18.2103	0
2008-12-23	8.20877	7.62289	-2.92929	0.0274601				2008-12-23	9.66377	-1.8873	-12.523	0				2008-12-23	8.72218	-1.53272	-14.6767	0
2008-12-24	5.51918	1.77542	-3.85379	0.00415562				2008-12-24	9.44685	-0.267304	-12.2012	0				2008-12-24	8.06246	-4.6456	-14.0617	0
2008-12-25	9.11057	4.25055	-4.36179	0				2008-12-25	9.49738	3.10602	-9.92511	0				2008-12-25	8.55186	-3.67136	-12.0227	0
2008-12-26	8.42418	7.95547	-3.34512	0.0105075				2008-12-26	8.71202	1.60171	-9.97983	0				2008-12-26	9.84691	-3.50241	-13.3474	0
2008-12-27	7.55844	5.17917	-4.69864	0.0804324				2008-12-27	8.94524	-6.75314	-14.2353	0				2008-12-27	9.80269	-1.61771	-13.7274	0
2008-12-28	8.6972	2.67889	-5.31363	0				2008-12-28	9.56645	-0.316009	-13.7818	0				2008-12-28	9.11423	-1.86038	-12.0283	0
2008-12-29	8.42646	3.44232	-5.56293	0				2008-12-29	10.2192	-1.2525	-13.816	0				2008-12-29	9.574	-4.04279	-14.7696	0
2008-12-30	9.75619	2.44739	-7.24649	0				2008-12-30	10.0093	1.4194	-11.6675	0				2008-12-30	10.0555	-0.855774	-15.1611	0
2008-12-31	9.53929	4.77167	-5.71155	0				2008-12-31	9.65584	1.4986	-10.1249	0				2008-12-31	10.116	-0.451263	-11.784	0
2009-01-01	8.98401	4.58264	-3.67734	0.00613866				2009-01-01	8.31514	1.2637	-9.48935	0				2009-01-01	9.30867	-0.851532	-11.4942	0
2009-01-02	8.34628	4.07489	-3.7851	0				2009-01-02	8.35205	1.69977	-9.57043	0.0125721				2009-01-02	10.1554	1.88385	-11.5124	0
2009-01-03	9.3051	5.95224	-2.83908	0				2009-01-03	9.04946	3.57794	-10.0967	0.00695134				2009-01-03	10.5783	3.69434	-7.54651	0
2009-01-04	5.02109	2.22839	-4.90524	0.221127				2009-01-04	9.75367	1.7142	-11.672	0				2009-01-04	10.0536	2.17047	-7.44437	0
2009-01-05	2.43671	-0.751373	-9.3588	0.0527196				2009-01-05	9.83954	-0.185242	-11.781	0				2009-01-05	4.33979	-1.69663	-9.77841	0.0118317
2009-01-06	1.00975	-5.69608	-11.6058	0.142642				2009-01-06	10.1411	0.734283	-11.8655	0				2009-01-06	9.10431	-2.43704	-12.1883	0
2009-01-07	9.71616	-4.9714	-12.8393	0				2009-01-07	1.99008	-4.17331	-11.5522	0.302294				2009-01-07	10.4049	0.66925	-10.5456	0
2009-01-08	8.56984	-6.14972	-13.0587	0				2009-01-08	10.1518	-1.38657	-11.9961	0				2009-01-08	10.147	1.75503	-9.37378	0
2009-01-09	5.7641	-4.83713	-13.2835	0				2009-01-09	9.84606	0.0267639	-11.1296	0				2009-01-09	8.11912	-1.79959	-13.4385	0
2009-01-10	10.0956	-2.4588	-13.7519	0				2009-01-10	7.6779	-0.0553894	-11.1848	0				2009-01-10	10.2898	-0.508453	-12.4062	0
2009-01-11	10.1295	1.8671	-12.2961	0				2009-01-11	10.1112	-2.19415	-12.0738	0				2009-01-11	10.4088	-2.34457	-12.5494	0
2009-01-12	6.01287	-1.25131	-10.3638	0				2009-01-12	10.5108	-3.40341	-13.3015	0				2009-01-12	10.5533	3.43274	-11.676	0
2009-01-13	9.3481	-1.58267	-9.74347	0.0128914				2009-01-13	10.5145	0.379852	-15.8541	0				2009-01-13	10.6429	0.192017	-11.8986	0
2009-01-14	7.79937	-2.73636	-11.1286	0.0899967				2009-01-14	10.3205	1.27344	-13.225	0				2009-01-14	9.58035	1.33475	-10.8925	0
2009-01-15	6.71158	-6.73123	-16.5864	0.0432683				2009-01-15	10.9056	1.85825	-10.1895	0				2009-01-15	10.3243	3.98856	-7.52441	0
2009-01-16	10.8363	-7.18854	-17.7483	0				2009-01-16	10.5622	0.575561	-10.4773	0				2009-01-16	6.96446	2.49472	-7.68097	0
2009-01-17	8.25854	4.3468	-8.55127	0.0117355				2009-01-17	10.2753	0.0976562	-10.9575	0				2009-01-17	6.76889	3.46887	-7.08722	0
2009-01-18	6.21237	-8.23999	-18.0039	0				2009-01-18	10.4051	-1.47781	-11.7136	0				2009-01-18	7.05257	1.37933	-11.1666	0
2009-01-19	11.8351	-10.4625	-20.3636	0				2009-01-19	11.2163	0.871796	-11.4849	0				2009-01-19	7.35591	0.520355	-11.9277	0
2009-01-20	10.2965	-3.66766	-18.7754	0				2009-01-20	4.24477	-1.20593	-12.3602	0				2009-01-20	3.29138	-1.854	-15.7957	0.0123778
2009-01-21	11.1256	-1.20724	-14.0873	0.0423465				2009-01-21	9.09261	4.13977	-13.0503	0				2009-01-21	8.77634	-10.3654	-18.8012	0
2009-01-22	7.47847	-9.64114	-18.7604	0.0105695				2009-01-22	10.7843	4.34921	-10.1861	0.652519				2009-01-22	11.7561	-8.05188	-19.916	0
2009-01-23	11.5036	-11.1742	-19.8738	0				2009-01-23	9.94782	-11.9444	-21.7522	0.0283292				2009-01-23	11.8064	-7.08072	-18.7743	0
2009-01-24	12.398	-5.89288	-20.236	0				2009-01-24	12.2748	-11.5661	-25.9272	0				2009-01-24	12.2355	-0.282745	-18.3263	0
2009-01-25	11.921	-2.82455	-17.4833	0				2009-01-25	9.01378	-8.18079	-23.1376	0				2009-01-25	11.7518	3.94601	-9.20706	0
2009-01-26	12.5165	-3.2583	-16.941	0				2009-01-26	12.1942	1.15454	-14.9439	0				2009-01-26	11.6418	5.63553	-8.01614	0.0598268
2009-01-27	12.2977	-1.22165	-15.2439	0				2009-01-27	9.94143	0.666046	-10.9441	0				2009-01-27	5.39881	-0.320557	-8.72256	1.08749
2009-01-28	11.9341	3.56598	-11.782	0				2009-01-28	11.6835	-7.37915	-16.8213	0				2009-01-28	7.9597	4.56668	-8.55847	0.00877968
2009-01-29	11.367	2.99326	-10.2892	0				2009-01-29	12.7249	-4.66293	-16.4851	0				2009-01-29	5.68189	-5.46927	-15.7942	0
2009-01-30	12.6741	6.47846	-7.8009	0				2009-01-30	11.3096	4.76364	-11.0241	0				2009-01-30	12.2207	-3.44058	-16.8722	0
2009-01-31	11.9706	5.78815	-3.81033	0				2009-01-31	11.0438	2.45779	-12.6782	0				2009-01-31	12.5719	0.341888	-12.7714	0
2009-02-01	9.43587	3.91998	-3.85913	0				2009-02-01	10.8583	5.55453	-9.383	0				2009-02-01	12.5799	0.981506	-11.7563	0
2009-02-02	12.4203	4.31766	-4.30542	0				2009-02-02	12.7431	6.13562	-4.60382	0				2009-02-02	13.1078	2.38104	-8.7615	0
2009-02-03	11.0498	4.05868	-4.32339	0				2009-02-03	12.224	5.48138	-8.00656	0.147566				2009-02-03	13.209	4.897	-6.96457	0
2009-02-04	9.37551	4.1272	-5.30633	1.02002				2009-02-04	4.27764	4.47082	-7.11285	0.23258				2009-02-04	9.32026	4.33008	-5.07782	0
2009-02-05	2.47424	0.0238953	-7.43179	1.7175				2009-02-05	3.35317	0.133789	-8.69186	0.160822				2009-02-05	12.7182	8.48871	-2.4826	0
2009-02-06	12.2134	-3.14548	-12.3257	0				2009-02-06	13.2636	6.23636	-7.01254	0.0123237				2009-02-06	11.3841	4.66367	-9.70441	0.129718
2009-02-07	13.4148	0.543823	-13.7973	0				2009-02-07	12.8339	1.68759	-11.369	0.00947259				2009-02-07	13.839	0.264374	-12.5877	0
2009-02-08	13.0212	1.55072	-9.68527	0				2009-02-08	5.11742	3.09149	-8.03476	0.285641				2009-02-08	13.5461	3.8465	-5.75821	0
2009-02-09	11.9965	5.11026	-6.22824	0				2009-02-09	10.5559	1.33865	-9.22504	0.0316102				2009-02-09	10.4741	7.92749	-4.60968	0
2009-02-10	13.9953	7.08905	-4.88519	0				2009-02-10	10.5726	2.42969	-9.63104	0.113498				2009-02-10	9.68017	11.4439	-2.84811	0.00792261
2009-02-11	13.6184	6.58899	-4.06342	0				2009-02-11	10.2495	-3.37622	-14.1902	0.0315581				2009-02-11	12.3591	4.48166	-6.55286	0.0127181
2009-02-12	13.489	6.85663	-3.94952	0.0360534				2009-02-12	9.84587	-1.76959	-13.5402	0.0720071				2009-02-12	14.4654	10.381	-3.79889	0
2009-02-13	10.3981	4.3656	-3.37924	0.0321986				2009-02-13	10.1533	0.145904	-11.0403	0.0895135				2009-02-13	13.6105	12.0867	-1.31641	0
2009-02-14	14.0023	4.00241	-4.75867	0.0251055				2009-02-14	13.3999	-1.67145	-15.6755	0.0608575				2009-02-14	9.9808	8.45602	-1.00534	0
2009-02-15	14.5328	5.29239	-4.78915	0				2009-02-15	14.6299	-1.05524	-12.0212	0.0574966				2009-02-15	9.28853	6.57855	-2.82419	0.173978
2009-02-16	8.59663	1.49109	-4.24902	0.326028				2009-02-16	13.862	5.98514	-8.51291	0.0252062				2009-02-16	7.42673	8.33402	-3.28766	0.25909
2009-02-17	8.46587	-0.950378	-12.2131	0				2009-02-17	13.725	7.923	-6.04916	0.0206753				2009-02-17	13.7728	8.40183	-3.57046	0.0276881
2009-02-18	13.97	-4.93988	-13.9746	0				2009-02-18	14.227	11.6169	-4.09671	0				2009-02-18	15.3607	13.0747	-1.27695	0
2009-02-19	15.178	-6.22092	-17.1611	0				2009-02-19	9.90422	1.15772	-7.68076	0.0525798				2009-02-19	14.8286	11.1952	0.179688	0
2009-02-20	16.5082	-0.304627	-17.3826	0				2009-02-20	15.1571	4.73502	-9.35785	0.0202156				2009-02-20	11.9422	12.1009	-0.64856	0.72747
2009-02-21	16.1278	3.75836	-13.0644	0				2009-02-21	14.1602	-0.582916	-10.2459	0.0352733				2009-02-21	11.5945	8.6615	-2.02451	0.0795531
2009-02-22	16.2567	1.27524	-10.5561	0				2009-02-22	10.3544	1.94104	-8.94516	0.114443				2009-02-22	14.7712	15.8457	0.0855102	0.123999
2009-02-23	16.5415	0.548492	-11.8276	0				2009-02-23	15.1365	4.70886	-6.4429	0.0179187				2009-02-23	6.42023	3.34073	-6.94815	1.88814
2009-02-24	17.7411	4.29126	-9.9667	0				2009-02-24	15.5764	4.5358	-9.94302	0				2009-02-24	5.53937	-1.88245	-10.9138	3.44214
2009-02-25	15.7398	4.65604	-5.36453	0.0165759				2009-02-25	15.8442	-0.0461731	-8.82938	0.124785				2009-02-25	10.671	-6.46756	-13.49	0.120711
2009-02-26	9.84709	-0.181152	-7.85254	0.0633334				2009-02-26	9.45771	0.539276	-9.31033	0.236257				2009-02-26	14.3605	-5.30499	-14.5169	0.0640304
2009-02-27	5.56891	-2.91037	-13.0266	0.0188486				2009-02-27	9.57314	-1.18158	-10.5546	0.0208402				2009-02-27	17.6578	-2.87643	-14.6864	0
2009-02-28	18.0045	-0.483093	-14.5339	0				2009-02-28	17.4283	1.76953	-9.12677	0.0122509				2009-02-28	17.8232	-1.06882	-10.2156	0
2009-03-01	6.9322	1.70706	-9.26352	0.0271805				2009-03-01	14.3803	5.8317	-8.11868	0.0332249				2009-03-01	16.3874	3.14755	-8.22281	0.0159476
2009-03-02	9.60422	2.36285	-11.9347	0.0919996				2009-03-02	17.2259	2.24655	-9.62985	0				2009-03-02	19.1677	3.57147	-6.62824	0
2009-03-03	14.0695	3.84216	-9.59125	0				2009-03-03	16.3737	2.65149	-10.4778	0.0470549				2009-03-03	19.2701	9.76334	-3.19757	0
2009-03-04	14.9613	3.69519	-5.86578	0.0102075				2009-03-04	17.9891	6.14618	-7.69556	4.31628e-05				2009-03-04	13.7747	0.597473	-9.18027	0.0729353
2009-03-05	19.4133	6.82889	-4.91562	0				2009-03-05	18.1413	6.44934	-5.95163	0.0269184				2009-03-05	19.9462	5.39941	-7.31863	0
2009-03-06	19.2396	9.79422	-5.03638	0.0106703				2009-03-06	18.297	8.91916	-5.91653	0				2009-03-06	19.2525	11.7967	-2.8464	0
2009-03-07	16.1335	3.45898	-4.19608	0.079721				2009-03-07	16.8935	10.1421	-3.37381	0.043105				2009-03-07	12.6967	9.63522	0.484955	0.0227541
2009-03-08	20.3532	7.1134	-7.37167	0				2009-03-08	18.1984	10.0699	-4.80017	0.0247242				2009-03-08	19.41	19.2154	2.97339	0
2009-03-09	18.5028	3.677	-8.67752	0.073617				2009-03-09	14.7922	16.1891	0.041626	0.0131087				2009-03-09	17.6177	20.0989	2.9372	0
2009-03-10	19.7475	6.33701	-2.59244	0				2009-03-10	13.0321	6.67203	-3.55945	0.0687477				2009-03-10	13.7316	11.8625	-7.52634	0
2009-03-11	20.7234	8.38522	-2.56808	0.0112944				2009-03-11	15.1338	12.263	-3.98602	0.0574024				2009-03-11	20.1211	3.51874	-8.5809	0
2009-03-12	16.4329	10.3867	-9.16904	0.0808358				2009-03-12	18.8529	13.6099	-3.74353	0.0685626				2009-03-12	10.9412	4.93875	-4.8649	0.0341836
2009-03-13	20.682	-3.84659	-13.3701	0				2009-03-13	18.5245	17.0436	-0.341431	0.130677				2009-03-13	15.4654	10.2921	-0.53952	0
2009-03-14	19.2618	4.16821	-14.2538	0.0112902				2009-03-14	15.5554	2.16217	-6.34369	0.0479844				2009-03-14	17.6336	9.39801	-0.253449	0.0126347
2009-03-15	17.8565	8.47726	-0.583466	0				2009-03-15	17.2103	5.46323	-5.91849	0.308977				2009-03-15	19.7322	13.7394	1.52237	0
2009-03-16	19.1553	11.9888	-0.0547485	0				2009-03-16	9.92532	5.02576	-5.48782	0.186479				2009-03-16	21.4648	14.964	1.95883	0
2009-03-17	18.5548	12.7707	-0.522583	0.00830653				2009-03-17	12.2261	6.80539	-2.00662	0.0421216				2009-03-17	20.8994	16.4578	2.82925	0
2009-03-18	20.9851	12.9006	-1.44861	0				2009-03-18	11.2755	6.64053	-2.42801	0.0824394				2009-03-18	16.3244	20.0317	4.48706	1.46256
2009-03-19	19.6413	20.0575	2.08078	0.0740105				2009-03-19	19.686	10.9348	-2.17224	0.0709983				2009-03-19	13.9332	21.5373	11.7453	0.0590088
2009-03-20	6.70167	10.8716	0.289612	0.127249				2009-03-20	19.5052	13.623	1.96304	0				2009-03-20	4.83627	13.8017	6.7558	0.260657
2009-03-21	19.094	16.1107	0.234039	0.0640441				2009-03-21	16.3551	19.7336	4.85934	0				2009-03-21	10.0161	12.1185	2.81546	2.80524
2009-03-22	17.9255	13.4758	1.48019	0.00259681				2009-03-22	13.9443	6.75388	-0.340027	0.266454				2009-03-22	7.69283	6.74313	0.651123	1.63498
2009-03-23	20.4258	16.0497	0.522186	0				2009-03-23	12.8941	5.44015	-3.70792	0.100634				2009-03-23	11.8917	6.92456	-1.23367	0.264201
2009-03-24	17.3361	17.1686	6.34631	2.07745				2009-03-24	21.8821	10.8906	-2.1622	0				2009-03-24	16.9527	7.41855	-1.20053	0.0306009
2009-03-25	10.7536	8.92929	1.7898	0.21942				2009-03-25	22.6205	13.0363	-0.408752	0				2009-03-25	15.4134	8.47217	-2.45718	0.0745745
2009-03-26	14.413	10.2708	0.365967	0.0738701				2009-03-26	21.2614	17.0523	2.91687	0.0417234				2009-03-26	19.3983	10.3379	-0.934235	0.0772347
2009-03-27	20.2357	12.7974	1.37048	0.209176				2009-03-27	17.5789	11.9046	-0.657959	0.206477				2009-03-27	19.1116	13.1038	2.04703	0.0506399
2009-03-28	21.1088	15.3703	1.3316	0.0872889				2009-03-28	13.1207	7.91171	-1.785	0.0830797				2009-03-28	13.1694	12.202	1.96835	0.0229436
2009-03-29	9.98453	8.53494	0.768494	0.324477				2009-03-29	17.9387	8.06686	-2.54916	0.0305684				2009-03-29	21.7632	17.7018	4.68219	0.144072
2009-03-30	13.062	6.539	0.596314	0				2009-03-30	22.6028	7.88892	-2.72961	0				2009-03-30	17.0533	10.334	-0.617676	0.14665
2009-03-31	16.1473	8.3971	0.422394	0.0417364				2009-03-31	21.4354	13.4059	-0.635559	0.0279728				2009-03-31	7.19276	2.74582	-3.08618	0.854358
2009-04-01	18.7769	12.7985	2.26367	0				2009-04-01	24.1034	9.75815	-1.96408	0				2009-04-01	15.9875	7.33356	-2.42435	0.391302
2009-04-02	21.668	15.5119	1.58475	0.216016				2009-04-02	22.657	12.0979	-1.41538	0.0575985				2009-04-02	22.4643	8.75095	-0.945831	0.0144791
2009-04-03	15.1393	9.78317	1.19736	0.128944				2009-04-03	24.3568	15.2422	1.6965	0				2009-04-03	20.6658	12.055	0.24939	0
2009-04-04	19.6407	10.4253	1.23349	0.0261599				2009-04-04	21.2113	17.4248	1.77954	0.0376937				2009-04-04	23.8124	15.4361	4.00229	0
2009-04-05	24.5118	15.9092	2.37756	0.045614				2009-04-05	21.9151	13.2715	1.64249	0				2009-04-05	24.4309	16.9656	4.79178	0.0493594
2009-04-06	24.8291	17.8203	3.3819	0				2009-04-06	11.5052	11.6856	3.59921	0.346531				2009-04-06	15.2397	12.9933	2.96228	0.199588
2009-04-07	21.8523	19.5228	6.18127	0				2009-04-07	19.7901	15.8048	1.89624	0.0788989				2009-04-07	14.662	9.41028	0.386505	0.0174064
2009-04-08	23.6009	20.8469	6.83456	0.0683877				2009-04-08	22.6425	20.6077	7.96408	0.0265018				2009-04-08	13.0688	10.1692	1.17468	0.219482
2009-04-09	16.7028	14.4318	9.1654	0.322039				2009-04-09	22.7717	23.4539	6.58362	0.00315514				2009-04-09	20.1119	12.0175	2.39587	0.0357067
2009-04-10	1.80566	9.30576	3.31262	0.641735				2009-04-10	17.607	16.5125	7.51566	0				2009-04-10	12.806	12.4587	1.94095	0.445199
2009-04-11	18.6249	9.71179	2.8894	0.0479846				2009-04-11	20.5751	14.7591	6.60565	0.0396351				2009-04-11	23.2331	19.1151	7.9697	0.0756847
2009-04-12	13.6108	9.40414	2.86844	0.407109				2009-04-12	21.9165	24.3878	8.94464	0				2009-04-12	19.4442	18.1624	5.0264	0.0671498
2009-04-13	23.6529	17.1738	3.30078	0.0791305				2009-04-13	20.6298	25.2595	9.38687	0				2009-04-13	15.2477	15.477	4.94531	0.171496
2009-04-14	18.1201	15.2947	5.93109	0.215741				2009-04-14	17.328	17.2759	6.73053	0.159096				2009-04-14	21.227	17.9889	7.48825	0.0370941
2009-04-15	17.4426	17.3811	6.07373	0.0386779				2009-04-15	19.8116	17.6213	1.89926	14.3325				2009-04-15	26.2303	18.741	6.43503	0
2009-04-16	25.4256	20.1822	6.41849	0				2009-04-16	14.5019	10.9716	1.62323	2.58106				2009-04-16	25.6508	26.47	10.1306	0
2009-04-17	27.4973	19.9468	6.84879	0				2009-04-17	17.6502	12.0694	3.77145	0.290535				2009-04-17	23.3374	31.3711	17.6671	0.340724
2009-04-18	27.102	22.1457	8.10931	0				2009-04-18	20.8376	14.993	5.36667	0				2009-04-18	4.65997	19.251	11.7347	0.891198
2009-04-19	24.1356	21.5602	9.41824	0				2009-04-19	23.1856	16.6948	6.48746	0				2009-04-19	16.7512	18.0289	9.58011	0.0215496
2009-04-20	25.2018	24.1843	10.6611	0				2009-04-20	23.7161	18.2872	4.78552	0.0306466				2009-04-20	26.3458	28.8837	13.3065	0
2009-04-21	18.0175	14.7304	5.31754	0.138775				2009-04-21	24.8093	22.6716	10.55	0				2009-04-21	26.1081	27.5415	17.2012	0
2009-04-22	25.3283	13.7152	4.35095	0				2009-04-22	25.199	22.1658	11.862	0.015088				2009-04-22	20.6925	23.7816	14.6048	2.26992
2009-04-23	16.7135	10.7782	3.64417	0.0893955				2009-04-23	24.1772	18.9143	7.64282	0				2009-04-23	5.66774	11.0548	6.8851	1.33464
2009-04-24	27.2066	16.7833	6.26953	0				2009-04-24	11.0994	15.5606	7.73404	0.279717				2009-04-24	11.5667	11.4321	5.4913	0.299291
2009-04-25	20.7538	21.1808	9.03262	0.0311488				2009-04-25	22.4889	18.2611	7.2868	0.0929948				2009-04-25	20.4166	13.1457	5.13211	0.0616524
2009-04-26	26.8556	21.6379	9.63705	0				2009-04-26	27.9145	24.694	11.9969	0				2009-04-26	25.1655	17.1247	6.7464	0.0318961
2009-04-27	24.0267	24.8444	11.1545	0.147962				2009-04-27	26.199	30.5925	14.8778	0				2009-04-27	26.8282	17.7654	4.53647	0
2009-04-28	17.3059	18.9532	8.60916	0				2009-04-28	25.7771	34.3261	17.876	0				2009-04-28	25.1616	13.3661	5.01169	0.0298943
2009-04-29	27.3273	17.4358	6.61731	0				2009-04-29	24.5894	31.5154	17.3734	0.161545				2009-04-29	21.2197	15.6687	6.63452	0.0717212
2009-04-30	27.4453	20.4251	7.69165	0.15383				2009-04-30	22.0525	24.7782	13.439	5.3283				2009-04-30	26.6468	20.2515	8.24826	0
2009-05-01	19.9329	21.2943	9.0513	0.0895617				2009-05-01	18.702	17.5649	8.88669	0.370801				2009-05-01	28.3065	21.6787	7.52515	0
2009-05-02	27.1703	26.2412	10.5181	0				2009-05-02	11.7368	13.1964	5.17487	0.66329				2009-05-02	26.7347	23.2877	10.8079	0
2009-05-03	27.89	30.1546	17.3133	0				2009-05-03	27.1477	12.4181	-0.809692	0.0985863				2009-05-03	27.3394	25.1536	12.3893	0
2009-05-04	25.6713	26.2751	12.712	0.145131				2009-05-04	29.1194	15.8957	2.74112	0				2009-05-04	20.9608	21.0805	9.48703	0.720612
2009-05-05	18.9336	17.1968	8.25732	0.123594				2009-05-05	27.7424	16.4772	5.48065	0				2009-05-05	24.6703	19.812	8.41183	0.082365
2009-05-06	26.4565	23.2729	10.316	0				2009-05-06	27.2366	22.6465	10.5114	2.36797				2009-05-06	26.8407	18.9904	9.18677	0.0149924
2009-05-07	26.4509	26.3824	14.6814	0.0436062				2009-05-07	22.2552	20.2395	10.1537	0.0876919				2009-05-07	27.8061	22.2176	12.2165	0
2009-05-08	15.0954	24.0975	14.9942	9.63132				2009-05-08	28.7877	23.9457	13.2996	0				2009-05-08	27.9602	23.3362	13.061	0
2009-05-09	20.1525	24.7404	15.6567	3.28547				2009-05-09	15.6774	21.2935	13.9132	0				2009-05-09	28.6535	26.3672	13.3234	0
2009-05-10	15.635	16.9312	8.39899	0.275556				2009-05-10	22.4295	22.4306	13.5044	0.204068				2009-05-10	26.012	24.4788	10.8621	0
2009-05-11	28.5718	17.0013	5.28928	0				2009-05-11	8.39124	17.7952	11.6186	0.572543				2009-05-11	28.5244	26.0608	14.8811	0
2009-05-12	27.6275	17.2147	7.90811	0				2009-05-12	27.9618	28.0274	15.3701	0				2009-05-12	21.3753	25.1139	11.5777	0.164736
2009-05-13	27.7115	22.3768	10.3463	0.0453266				2009-05-13	27.1595	29.688	16.1712	0				2009-05-13	25.3315	21.1885	7.8797	0.609009
2009-05-14	28.9042	25.4141	12.6201	0.0271022				2009-05-14	23.8968	29.7567	16.7974	0				2009-05-14	22.4661	15.3701	7.32071	0.512032
2009-05-15	26.2471	25.9828	16.3657	0.266382				2009-05-15	25.9581	30.3777	18.1765	0				2009-05-15	27.9498	19.3925	7.75424	0
2009-05-16	29.1533	24.3242	14.9993	0				2009-05-16	27.196	26.233	10.5359	1.47859				2009-05-16	29.5031	23.0722	11.1347	0
2009-05-17	26.761	31.1551	17.2379	0.141143				2009-05-17	19.1706	18.5645	8.59445	0.652237				2009-05-17	28.4911	25.2808	13.4021	0
2009-05-18	18.1339	17.0187	10.7622	0.109073				2009-05-18	25.624	23.2195	11.3707	0.112073				2009-05-18	28.3978	26.7714	14.4222	0.020472
2009-05-19	30.6523	19.5445	8.10788	0				2009-05-19	27.0054	22.3164	13.1539	0				2009-05-19	29.0752	26.9251	15.3139	0
2009-05-20	28.8223	25.1413	9.57938	0.143883				2009-05-20	25.5833	24.4607	15.2471	0.168314				2009-05-20	25.7385	35.4676	20.1888	0.789394
2009-05-21	28.0896	28.0904	13.3345	0				2009-05-21	26.3385	24.5101	14.8115	0.158706				2009-05-21	14.2294	19.1107	15.9427	0.354746
2009-05-22	27.9164	28.0461	17.3962	0.0726666				2009-05-22	27.2447	27.477	16.4689	0				2009-05-22	27.2792	25.0312	14.8825	0.0239669
2009-05-23	18.2265	21.0361	10.4055	0.276331				2009-05-23	27.8771	30.6243	18.1605	0				2009-05-23	29.544	27.2882	16.3242	0
2009-05-24	32.3557	17.1218	6.45142	0				2009-05-24	26.693	31.4153	20.6989	0				2009-05-24	28.311	29.5873	17.9829	0
2009-05-25	31.4685	22.8099	8.80453	0				2009-05-25	8.43792	23.7931	16.9827	0.521594				2009-05-25	26.1448	30.8594	18.9991	0.220171
2009-05-26	30.955	28.0014	14.6627	0				2009-05-26	22.6606	25.6595	15.7501	0				2009-05-26	27.5106	29.2735	17.8536	0.715401
2009-05-27	23.4499	27.8391	16.0713	0.0210249				2009-05-27	22.6648	24.0247	14.9827	0.16062				2009-05-27	16.2994	24.6582	17.5325	8.62891
2009-05-28	28.7186	24.7188	11.6466	0				2009-05-28	21.4737	25.6803	16.3583	1.11418				2009-05-28	19.114	22.8134	14.9369	0.653571
2009-05-29	30.1084	22.0691	10.9079	0				2009-05-29	15.1005	21.5655	11.0377	1.45605				2009-05-29	15.0557	19.6481	13.3815	0.0949738
2009-05-30	29.359	24.513	13.6388	0				2009-05-30	30.6414	22.6412	12.7392	0				2009-05-30	17.2817	19.6551	12.6055	0.0499853
2009-05-31	26.2142	27.3114	16.0715	0				2009-05-31	28.2544	26.0354	15.5803	0				2009-05-31	20.1066	23.0212	13.5136	0
2009-06-01	28.1988	31.3813	19.7037	0.0272361				2009-06-01	28.6836	29.029	18.1245	0				2009-06-01	20.5453	23.9286	14.0807	0
2009-06-02	19.2419	26.0325	19.3739	1.53				2009-06-02	29.173	30.4324	19.5097	0				2009-06-02	20.6571	25.6387	16.4099	0
2009-06-03	12.631	21.2186	14.7426	0.0430701				2009-06-03	30.7634	33.5718	21.4898	0				2009-06-03	8.13121	21.5107	16.5598	2.4308
2009-06-04	29.5498	31.1007	17.4673	0.153224				2009-06-04	28.3147	34.5393	23.0628	0.256688				2009-06-04	26.8901	31.9519	18.5313	0.0626367
2009-06-05	27.384	28.0353	17.1204	0.0106356				2009-06-05	25.6861	36.1559	22.437	0.242325				2009-06-05	27.3797	25.9372	13.7901	0
2009-06-06	28.9542	29.3189	18.305	0				2009-06-06	27.6524	28.9254	19.0124	0.105923				2009-06-06	29.1964	27.9597	18.185	0
2009-06-07	25.1281	31.3988	19.7892	0.208389				2009-06-07	28.97	26.0609	16.4254	0.106086				2009-06-07	27.0904	30.9708	21.3205	0.47533
2009-06-08	28.3584	35.3808	21.9964	0.348897				2009-06-08	30.1367	25.5447	15.7977	0.19727				2009-06-08	16.464	23.3242	14.5069	0.0789282
2009-06-09	21.8597	24.9935	13.3403	0.28489				2009-06-09	30.467	24.6741	16.6674	0				2009-06-09	29.0548	23.9927	11.2844	0
2009-06-10	12.0191	16.6432	9.65973	2.38895				2009-06-10	30.7181	29.7435	18.8289	0				2009-06-10	30.3732	26.7717	16.4592	0.145214
2009-06-11	25.1227	24.4578	12.3301	0				2009-06-11	26.3346	29.3228	13.5746	2.81128				2009-06-11	29.7563	28.849	15.1479	0
2009-06-12	25.9788	28.9154	17.8029	0				2009-06-12	24.4799	24.6548	15.5776	0.0750731				2009-06-12	30.2672	26.8344	17.2636	0
2009-06-13	13.9452	25.1255	18.9996	0.257928				2009-06-13	30.0527	25.641	17.1448	0				2009-06-13	27.6182	28.8104	19.3886	0.179888
2009-06-14	16.1592	24.8422	18.2416	0.256141				2009-06-14	26.4078	25.7231	17.7574	0.371276				2009-06-14	27.1921	29.2018	20.0119	0.487039
2009-06-15	12.2566	21.738	14.8235	0.704173				2009-06-15	26.4574	25.8815	17.4792	0				2009-06-15	20.1135	30.1749	16.4653	0
2009-06-16	9.7799	21.1424	17.3364	0.883678				2009-06-16	22.9225	26.7027	17.7707	0				2009-06-16	28.1276	30.3259	19.5365	0
2009-06-17	16.1225	23.065	18.3399	0.771172				2009-06-17	29.9523	30.1184	20.3903	0.118754				2009-06-17	22.5054	29.9572	20.4572	0.0261649
2009-06-18	26.661	29.1386	17.1482	0.0874304				2009-06-18	29.7483	30.3312	19.999	0.417009				2009-06-18	28.656	32.6813	18.0994	0
2009-06-19	25.8692	29.4257	16.4804	0				2009-06-19	28.3576	30.5916	19.3829	0.0924574				2009-06-19	26.537	33.1092	21.2145	0.135447
2009-06-20	28.3772	30.3194	17.7382	0				2009-06-20	10.1483	24.954	17.2885	5.38543				2009-06-20	26.3115	31.1983	21.1584	0.904595
2009-06-21	25.5654	29.2582	17.7353	0.0510351				2009-06-21	17.1999	22.049	14.0659	1.88098				2009-06-21	11.46	24.8876	17.8125	3.48785
2009-06-22	28.2943	28.8641	18.3016	0				2009-06-22	10.5941	20.0602	12.8814	6.38246				2009-06-22	9.57505	23.0596	16.8034	3.35136
2009-06-23	29.7405	29.2563	17.5546	0				2009-06-23	17.0188	20.9334	13.8804	1.20427				2009-06-23	13.1385	22.6408	15.7535	0.271752
2009-06-24	29.2504	29.8565	18.8472	0				2009-06-24	27.8265	26.5138	15.8858	0.184083				2009-06-24	20.118	24.2141	16.5138	0
2009-06-25	29.2948	30.2685	20.1203	0				2009-06-25	29.0062	28.014	14.8772	0.141265				2009-06-25	22.0747	24.509	17.8149	0.0880812
2009-06-26	24.2172	28.2635	20.7351	0.0651237				2009-06-26	24.7212	26.113	13.0182	0.0726934				2009-06-26	26.1155	30.3659	19.8221	0.0637656
2009-06-27	13.311	23.851	20.2009	1.47009				2009-06-27	29.4099	27.8136	15.434	0				2009-06-27	25.3339	31.4375	22.358	0.220639
2009-06-28	21.9675	27.8217	19.7593	0.141978				2009-06-28	21.0164	26.8121	17.2567	0				2009-06-28	26.2165	31.6107	22.8927	0.85879
2009-06-29	25.5746	31.0096	18.6217	0				2009-06-29	26.4535	29.2455	18.7503	0				2009-06-29	25.6394	30.7143	23.0655	2.29069
2009-06-30	28.8033	29.9139	19.7992	0				2009-06-30	28.3267	30.8973	20.5223	0.0586586				2009-06-30	26.4494	28.3697	21.8609	0.860142
2009-07-01	25.4818	32.1728	21.4559	0.0203719				2009-07-01	20.8758	28.9472	19.5663	0.00532627				2009-07-01	19.1993	26.1925	19.9161	3.96112
2009-07-02	22.766	32.444	23.377	3.1966				2009-07-02	14.3364	27.3468	18.568	0				2009-07-02	25.1213	25.7326	18.6899	2.66696
2009-07-03	12.9513	25.8486	19.5948	9.63684				2009-07-03	24.015	30.2519	17.8801	0				2009-07-03	24.5824	26.7645	18.6565	0.420783
2009-07-04	11.8799	20.1738	15.1772	7.52558				2009-07-04	8.94356	21.5182	16.661	7.23245				2009-07-04	24.5861	26.9646	19.2564	0.622664
2009-07-05	25.7847	29.3828	18.2074	0.533701				2009-07-05	28.0335	29.6795	18.2217	0.601859				2009-07-05	26.522	28.1959	19.5718	0
2009-07-06	14.2197	22.9112	15.6393	0.722562				2009-07-06	16.3591	27.7737	15.835	0				2009-07-06	23.8109	30.7127	19.098	0.0756524
2009-07-07	28.0658	26.9164	16.1108	0.349963				2009-07-07	16.1156	26.2755	17.3873	0				2009-07-07	28.6529	26.2794	13.8657	0.100879
2009-07-08	28.1246	27.7445	16.7324	0.0988205				2009-07-08	26.449	31.6326	19.283	0.343219				2009-07-08	27.2254	26.8272	15.9865	0
2009-07-09	18.8178	27.786	18.2188	0.133623				2009-07-09	21.9698	28.0662	19.6855	0				2009-07-09	27.836	28.7477	16.7661	0
2009-07-10	30.1425	30.744	19.4793	0.0693805				2009-07-10	28.7217	30.7969	19.7998	0.10036				2009-07-10	18.0285	26.4292	19.7839	1.19819
2009-07-11	26.1625	32.1509	19.9255	0.100439				2009-07-11	25.8904	32.1691	20.8526	0.387449				2009-07-11	8.82514	23.917	18.2523	5.98148
2009-07-12	23.8855	32.7846	21.7409	1.66078				2009-07-12	24.0726	32.1988	22.317	3.18685				2009-07-12	10.3803	24.3324	17.8456	4.81807
2009-07-13	6.57625	27.7081	21.8298	1.49911				2009-07-13	20.0491	31.2261	18.6912	13.215				2009-07-13	13.3907	24.7786	18.7943	1.60712
2009-07-14	12.1615	27.3323	23.6694	1.89579				2009-07-14	25.31	29.9575	19.4703	0.152894				2009-07-14	10.5954	22.9973	17.3291	0.39707
2009-07-15	20.2346	30.0463	22.8575	10.1144				2009-07-15	15.7406	30.4113	20.6223	0				2009-07-15	23.9645	28.2885	19.2374	0.103988
2009-07-16	22.2487	27.4352	21.8539	1.10117				2009-07-16	27.231	33.6762	22.8925	1.01461				2009-07-16	19.1627	26.2184	21.0005	1.34284
2009-07-17	25.4954	29.8216	20.7929	0.026804				2009-07-17	23.6614	33.1473	19.4961	0.0374302				2009-07-17	17.3908	26.2605	19.1114	0.226003
2009-07-18	25.7242	30.2021	20.6837	0.0279458				2009-07-18	24.8343	34.5094	19.7288	0.171711				2009-07-18	15.2103	25.2765	19.5243	0.135964
2009-07-19	25.9956	30.7387	22.6895	0.495646				2009-07-19	21.9146	34.4937	21.3304	0.0847256				2009-07-19	12.0315	25.0139	19.4261	1.23629
2009-07-20	22.9544	27.6189	21.8695	1.99915				2009-07-20	18.7906	31.7337	20.4037	1.12576				2009-07-20	14.8126	24.731	18.3837	1.07857
2009-07-21	24.6433	27.9765	20.0775	0.221473				2009-07-21	28.2957	31.0585	19.1509	0				2009-07-21	11.239	23.9169	17.8904	0.897036
2009-07-22	26.9144	31.7657	21.7784	0				2009-07-22	30.0937	30.0984	18.2961	0				2009-07-22	23.5796	25.5757	18.7629	1.12615
2009-07-23	26.2888	34.0662	23.2475	0				2009-07-23	27.9721	30.3635	19.0145	0.0757818				2009-07-23	23.0663	26.7837	19.6079	0.657043
2009-07-24	27.1187	34.6757	23.7667	0				2009-07-24	28.049	30.7156	21.2394	0				2009-07-24	22.33	27.9117	18.0167	0.120352
2009-07-25	24.5629	35.5479	24.4735	2.92708				2009-07-25	28.1262	32.404	22.1014	0.10273				2009-07-25	18.1397	25.6921	18.4297	0.436398
2009-07-26	7.01856	28.9176	20.6504	4.19323				2009-07-26	27.2873	31.5805	22.0826	0.0681889				2009-07-26	26.2845	25.9797	19.1557	0
2009-07-27	11.1593	25.8069	20.7923	3.76896				2009-07-27	28.4553	32.1619	21.8981	0.0688356				2009-07-27	25.676	27.3896	19.331	0.580852
2009-07-28	14.7118	28.699	16.4829	7.10175				2009-07-28	26.5694	35.0196	22.661	0				2009-07-28	26.8522	28.2566	19.6683	0.00661679
2009-07-29	16.9864	26.2894	16.1952	0.175302				2009-07-29	20.1057	34.2193	24.0762	0				2009-07-29	22.3693	27.8495	20.4248	0.337417
2009-07-30	26.0961	30.1921	16.8326	0.0322713				2009-07-30	26.4429	37.2366	26.2435	0.0154229				2009-07-30	16.3113	25.8176	19.6307	1.80932
2009-07-31	27.0764	30.5185	17.1754	0.141783				2009-07-31	27.1832	40.1178	26.142	0				2009-07-31	12.5824	21.7459	16.605	7.14297
2009-08-01	18.3185	26.4065	17.6431	1.22196				2009-08-01	17.1674	34.1435	23.0229	0				2009-08-01	17.4814	25.841	17.926	2.23896
2009-08-02	24.7243	27.6257	19.0233	1.62848				2009-08-02	27.0206	36.5701	24.3171	0				2009-08-02	14.4441	25.2719	17.9506	2.84956
2009-08-03	26.7938	26.9398	16.188	0.204726				2009-08-03	26.4045	31.0951	22.8299	0				2009-08-03	16.0138	27.2105	18.0205	0.329129
2009-08-04	24.756	28.0213	17.984	0				2009-08-04	27.5709	29.583	20.7854	0.0739251				2009-08-04	25.1988	30.0707	22.0877	0.261933
2009-08-05	24.8323	28.765	19.6491	0.0803646				2009-08-05	27.1581	29.9824	19.5168	0.0899663				2009-08-05	23.1905	29.1295	18.7927	0.113235
2009-08-06	23.0966	30.578	21.2391	0.208918				2009-08-06	25.8129	31.9132	20.9611	0				2009-08-06	24.2739	27.0226	20.2264	0.264697
2009-08-07	20.3538	30.642	22.1699	6.40974				2009-08-07	11.5347	28.5742	21.1427	4.81919				2009-08-07	17.8091	25.4747	19.5639	0.179339
2009-08-08	12.5135	24.3484	19.2936	1.83244				2009-08-08	14.0768	25.0666	20.1766	11.8668				2009-08-08	20.5609	28.5404	20.6457	0.535373
2009-08-09	23.7242	28.6498	20.3416	0.34035				2009-08-09	11.7348	23.5313	16.917	4.23767				2009-08-09	18.8827	28.5579	20.3463	1.30017
2009-08-10	18.0487	27.3353	19.9994	0.021944				2009-08-10	21.6962	27.8538	16.3294	0.53277				2009-08-10	13.936	26.3438	18.9497	7.91589
2009-08-11	22.6201	27.8331	20.5391	0.682262				2009-08-11	21.36	29.5301	17.2405	0				2009-08-11	10.1553	23.408	18.1579	2.35243
2009-08-12	24.47	29.872	17.1371	0				2009-08-12	26.17	28.7663	13.8224	0				2009-08-12	6.79709	19.5059	15.4211	2.73457
2009-08-13	23.3283	29.4917	18.8629	0.244802				2009-08-13	27.1686	29.3702	15.0885	0.0669901				2009-08-13	10.1035	23.6474	15.0666	5.68641
2009-08-14	26.8366	30.8762	15.5818	0				2009-08-14	27.9804	33.1682	15.896	0				2009-08-14	6.56033	23.6661	17.4617	9.86731
2009-08-15	28.0085	29.3111	15.0167	0				2009-08-15	23.8905	34.4056	21.2213	1.00824				2009-08-15	6.80388	22.9775	14.6793	3.08276
2009-08-16	25.7022	30.9244	16.1385	0				2009-08-16	15.1115	28.3057	18.7237	1.33047				2009-08-16	12.6984	28.9402	16.5417	1.86913
2009-08-17	24.4387	30.0123	19.6366	0				2009-08-17	13.4315	26.7013	18.4611	0.455646				2009-08-17	8.05147	26.6086	18.7912	12.8494
2009-08-18	25.9355	30.1769	19.7808	0				2009-08-18	23.1135	31.7173	21.329	0.0877099				2009-08-18	3.1526	19.1179	15.6441	12.0479
2009-08-19	24.7678	30.488	20.3298	0				2009-08-19	22.4887	30.7235	17.8033	3.56791				2009-08-19	7.19589	17.1266	11.632	6.25877
2009-08-20	24.9678	30.7527	19.8816	0				2009-08-20	12.6957	22.2328	14.0968	2.94746				2009-08-20	7.38499	18.6658	12.0779	5.06397
2009-08-21	21.9184	30.1772	19.7652	0				2009-08-21	18.0389	24.5416	15.6943	0.158003				2009-08-21	22.8906	23.9751	15.9078	0
2009-08-22	21.6785	30.7908	20.9644	0				2009-08-22	21.589	27.2671	17.038	0				2009-08-22	16.0972	20.9038	14.9058	3.20395
2009-08-23	12.0597	26.0114	19.7299	0.562555				2009-08-23	13.0094	25.5953	17.0397	1.64711				2009-08-23	9.19258	19.2885	13.2458	5.66573
2009-08-24	18.8022	26.941	20.0962	1.28074				2009-08-24	25.855	30.2222	15.3097	0.346115				2009-08-24	13.379	19.9928	13.5429	0.995571
2009-08-25	15.1566	27.3299	19.8958	4.00409				2009-08-25	18.6812	25.0009	16.7333	0				2009-08-25	20.9357	24.8462	17.4464	0.126814
2009-08-26	13.857	27.3557	20.913	4.02978				2009-08-26	22.4642	30.7912	19.5307	0.203524				2009-08-26	22.4629	26.9686	18.0704	0
2009-08-27	6.41747	21.9965	15.5308	3.00635				2009-08-27	19.6051	31.0355	19.1576	0.266974				2009-08-27	12.8733	21.2721	15.9579	0.23201
2009-08-28	12.7621	21.4901	14.0246	0.623572				2009-08-28	12.2597	28.0267	17.9137	0.39605				2009-08-28	7.87272	19.3346	14.6408	5.74164
2009-08-29	15.8645	22.1405	15.1921	0				2009-08-29	11.5299	26.5621	17.6375	0.0969849				2009-08-29	24.3803	25.7057	15.3553	0
2009-08-30	22.2483	26.3133	15.9333	0.0700072				2009-08-30	13.7169	24.2877	17.4135	3.17764				2009-08-30	22.1816	26.6971	15.1294	1.06534
2009-08-31	19.9071	24.6818	16.1043	0.483634				2009-08-31	12.0477	25.052	13.8012	2.51096				2009-08-31	22.0132	26.2162	13.8962	0
2009-09-01	7.29814	19.0268	15.915	13.0943				2009-09-01	11.6584	18.9688	10.5691	0.327665				2009-09-01	23.7767	23.0353	12.5985	0.273614
2009-09-02	2.81995	17.193	11.8077	17.1523				2009-09-02	18.3636	21.304	13.0889	0				2009-09-02	22.8905	23.2361	13.3835	0.133435
2009-09-03	23.1354	22.8095	11.0991	0.0372809				2009-09-03	16.7156	26.1704	13.9685	0				2009-09-03	23.045	24.583	15.2436	0
2009-09-04	24.3173	23.0293	11.6671	0				2009-09-04	15.2736	26.7544	15.0783	0.0505868				2009-09-04	23.1861	28.0116	16.8132	0.0786883
2009-09-05	15.9418	25.4716	14.9111	1.24523				2009-09-05	16.6166	27.0708	15.1306	0.313468				2009-09-05	23.7909	24.4737	13.4042	0.0649441
2009-09-06	3.54568	18.2454	9.00543	13.2089				2009-09-06	12.5932	27.3704	17.988	0.268896				2009-09-06	21.6553	25.0896	15.2416	3.22293
2009-09-07	7.32691	12.6775	9.81314	4.17098				2009-09-07	8.91129	26.7758	16.0917	3.37731				2009-09-07	6.04553	18.8367	13.0304	1.86357
2009-09-08	19.7169	20.8696	9.56903	10.803				2009-09-08	4.25265	18.1451	12.3554	16.3791				2009-09-08	17.6418	24.401	15.1936	0.212771
2009-09-09	9.69889	19.592	14.303	0.724704				2009-09-09	1.5875	13.2704	8.20837	7.49334				2009-09-09	19.6181	23.6895	10.7264	0
2009-09-10	18.8193	24.9702	14.8355	0.0156281				2009-09-10	5.10362	16.7478	9.00684	3.39275				2009-09-10	20.7764	21.7553	10.844	0.0430015
2009-09-11	21.4781	25.6814	14.9749	0.0249488				2009-09-11	14.8545	19.5038	10.0539	0.0589249				2009-09-11	20.1515	18.7703	7.18411	0.0749079
2009-09-12	11.7189	22.7067	14.9559	0.0685421				2009-09-12	12.1374	16.4152	9.20038	0.875648				2009-09-12	22.234	19.4856	8.34592	0
2009-09-13	19.4613	24.7761	15.2492	0.0399416				2009-09-13	12.6524	19.5481	10.548	0.481293				2009-09-13	19.9431	20.6983	11.1422	0.0755083
2009-09-14	22.1555	27.6976	16.4422	0				2009-09-14	19.3328	23.3821	12.1085	0.118808				2009-09-14	21.5828	23.4938	13.0131	0.101094
2009-09-15	20.2571	29.5091	16.4526	0.0838874				2009-09-15	19.3933	26.173	14.4876	2.07742				2009-09-15	21.2873	27.2004	15.1023	0.0563046
2009-09-16	15.6455	29.9654	17.1934	1.37546				2009-09-16	11.5507	19.2664	9.63422	2.47259				2009-09-16	15.1967	22.3439	14.3996	2.43452
2009-09-17	21.1798	28.3747	16.8078	0.378308				2009-09-17	19.9811	21.2676	11.2878	0.18236				2009-09-17	17.1879	23.6931	13.9085	1.62745
2009-09-18	8.01365	22.0543	13.8396	2.86131				2009-09-18	19.7144	20.9676	10.6424	0.637604				2009-09-18	10.9598	17.9088	10.5308	1.14394
2009-09-19	17.2682	24.3152	13.3701	0.0617865				2009-09-19	20.0617	23.3389	9.61243	0.119317				2009-09-19	9.32082	14.541	8.20926	0.749301
2009-09-20	20.6551	23.0695	12.2487	0.0217279				2009-09-20	21.69	21.1693	8.7648	0				2009-09-20	13.6021	20.72	9.27164	0.186672
2009-09-21	20.9447	27.3145	12.77	0				2009-09-21	18.9318	24.2758	13.1587	0.106758				2009-09-21	20.3346	23.478	9.24612	0.0094548
2009-09-22	15.4314	21.4088	9.75995	0.00276241				2009-09-22	18.0511	22.1495	9.26434	0.166981				2009-09-22	20.5848	20.9038	8.69046	0
2009-09-23	20.73	22.4173	9.66983	0				2009-09-23	20.08	22.7844	10.797	0				2009-09-23	20.468	21.1696	7.49789	0
2009-09-24	19.1314	26.7675	10.6171	14.6938				2009-09-24	19.9095	17.0945	6.5152	0				2009-09-24	20.9449	20.1468	5.94699	0
2009-09-25	9.28554	15.257	7.07452	2.30883				2009-09-25	18.4507	19.5418	8.34787	0				2009-09-25	18.7923	21.0387	10.7412	0.210302
2009-09-26	18.8035	19.8904	6.89798	0.0113315				2009-09-26	17.6846	22.0905	9.43814	0.256792				2009-09-26	17.3443	20.1057	8.10532	0.0443414
2009-09-27	16.9283	22.3973	10.4699	0.421197				2009-09-27	19.3461	23.7965	10.6753	0				2009-09-27	19.2202	20.4745	6.07449	0.0342635
2009-09-28	7.15712	18.0698	10.1252	1.39825				2009-09-28	19.1577	21.2665	11.0963	0				2009-09-28	20.2259	20.9864	6.44632	0
2009-09-29	13.7134	16.8986	5.37317	0.141915				2009-09-29	13.7338	23.5572	10.5066	0				2009-09-29	19.6953	22.2916	6.96878	0
2009-09-30	13.0948	18.2141	6.20389	0.405027				2009-09-30	9.32441	18.5955	9.23526	0.516869				2009-09-30	18.5896	20.6677	6.42273	0
2009-10-01	20.2452	20.5223	6.64758	0				2009-10-01	19.0332	20.8633	8.83514	0.0630056				2009-10-01	19.4599	20.9285	6.06552	0
2009-10-02	17.3966	22.6194	10.1375	0				2009-10-02	17.7357	17.566	8.71875	0.139608				2009-10-02	19.9816	23.5926	7.99753	0
2009-10-03	16.234	21.6738	10.7392	0.00808855				2009-10-03	18.8085	20.9628	7.71524	0				2009-10-03	19.5406	24.6253	10.2809	0
2009-10-04	12.1908	18.5713	9.93362	0.135008				2009-10-04	17.9778	23.6459	10.7579	0				2009-10-04	15.2136	18.7685	7.98178	1.16441
2009-10-05	11.4709	13.5136	3.61319	0.314222				2009-10-05	17.9645	24.3467	10.5232	0.0665291				2009-10-05	9.58102	14.0973	3.92966	6.55476
2009-10-06	16.4973	15.5594	2.85043	0				2009-10-06	9.90846	23.0928	9.36163	0.0645734				2009-10-06	8.05674	16.0768	5.22501	0.925888
2009-10-07	18.3542	15.1979	1.47788	0				2009-10-07	17.4756	25.854	11.5468	0				2009-10-07	19.0025	20.1928	6.82132	0
2009-10-08	19.1273	21.4651	1.91098	0				2009-10-08	8.27896	21.3877	10.5884	3.77099				2009-10-08	15.8337	20.9361	9.34482	0.610841
2009-10-09	17.7457	23.7031	7.18832	0				2009-10-09	16.7251	13.6709	5.58624	0.221374				2009-10-09	14.1127	20.4192	9.69711	5.23173
2009-10-10	12.3899	20.9281	9.24899	0.298124				2009-10-10	15.5829	18.7136	8.5289	0				2009-10-10	5.2743	16.338	9.51523	0.159867
2009-10-11	15.6457	19.738	9.54614	0.283079				2009-10-11	15.2849	14.8443	8.80121	0				2009-10-11	11.8371	17.8174	9.32236	0.926697
2009-10-12	12.4913	19.7239	9.99118	0.120533				2009-10-12	14.7263	14.1614	3.76184	0				2009-10-12	5.59851	10.7053	5.40372	6.96045
2009-10-13	15.5607	25.1123	10.919	1.95843				2009-10-13	16.6673	16.4442	4.10745	0				2009-10-13	12.3935	15.6415	5.20319	0.174131
2009-10-14	14.2899	14.0808	8.18091	1.02753				2009-10-14	17.263	15.0336	3.16925	0				2009-10-14	13.4496	14.2095	3.77393	0.174212
2009-10-15	4.77506	12.1562	6.37769	1.35765				2009-10-15	15.2626	16.5361	5.36475	0				2009-10-15	7.19029	12.4403	4.39481	0.926838
2009-10-16	15.7329	17.2801	6.25366	0.404421				2009-10-16	14.6521	17.9276	4.46161	0				2009-10-16	16.6516	17.9512	6.8551	0
2009-10-17	3.90132	14.435	1.65137	4.77905				2009-10-17	16.5219	16.6068	5.40414	0				2009-10-17	14.2197	15.5454	3.21542	0.0570749
2009-10-18	3.73462	5.25101	1.55185	2.35377				2009-10-18	12.9942	18.4506	6.28607	0				2009-10-18	15.9902	11.7511	1.3194	0.0310903
2009-10-19	7.61431	11.5019	1.66757	0.138525				2009-10-19	15.9114	17.7122	6.79117	0				2009-10-19	16.2573	12.9399	0.619904	0
2009-10-20	10.2112	11.2931	1.85425	0.0911277				2009-10-20	14.5912	19.0049	6.26462	0				2009-10-20	15.6211	11.9438	-0.602753	0
2009-10-21	15.5108	17.5348	4.17908	0				2009-10-21	6.95416	15.8246	5.02264	0				2009-10-21	14.5572	14.5405	0.906097	0.0665065
2009-10-22	14.5749	18.9617	6.77298	0.616762				2009-10-22	8.45407	16.5901	5.6366	0				2009-10-22	14.9606	16.5376	2.91229	0.0755649
2009-10-23	1.9408	10.6519	1.99878	1.11517				2009-10-23	15.4449	19.0171	6.06946	0				2009-10-23	14.3281	16.005	3.70734	0.0517005
2009-10-24	14.9827	11.0886	0.719757	0				2009-10-24	15.2188	19.8803	6.74957	0				2009-10-24	12.656	16.1202	3.19098	0.226173
2009-10-25	14.8513	13.1734	0.02948	0				2009-10-25	14.6296	16.7614	6.69534	0.472755				2009-10-25	10.11	10.0769	1.98929	0.394145
2009-10-26	14.1113	15.2204	-0.18512	0.0534963				2009-10-26	6.04803	6.4635	-3.44663	0.603636				2009-10-26	14.3057	18.4477	4.65543	0
2009-10-27	14.5959	14.4824	1.04239	0				2009-10-27	9.23883	5.91159	-4.60346	0.371357				2009-10-27	10.1153	19.0629	6.87826	0.920646
2009-10-28	14.9799	16.3638	-0.557739	0				2009-10-28	14.0151	9.91745	-3.17483	0				2009-10-28	8.00111	10.6098	2.10416	1.39054
2009-10-29	13.8164	17.2517	4.09329	0				2009-10-29	14.9145	9.16028	-5.18802	0				2009-10-29	12.3767	11.751	-1.49878	0
2009-10-30	12.163	15.8989	3.2048	0.0622978				2009-10-30	13.7225	8.92899	-4.86472	0				2009-10-30	10.8547	10.0592	-1.6055	0
2009-10-31	11.9442	14.5644	1.67554	0.0119239				2009-10-31	13.8185	13.7732	-0.0388489	0				2009-10-31	11.7084	10.4383	-0.709015	0.131975
2009-11-01	13.507	15.6136	2.21423	0.419812				2009-11-01	13.6528	14.0432	1.12119	0				2009-11-01	11.4848	10.0182	-0.734833	0.0283611
2009-11-02	10.5625	14.6712	2.72391	0.0187776				2009-11-02	11.902	12.9141	0.233246	0.0419458				2009-11-02	13.4667	15.0797	0.180389	0.0352999
2009-11-03	11.1301	14.6316	0.184723	0.00696573				2009-11-03	13.0766	14.3615	0.792786	0.0234086				2009-11-03	8.45035	12.0217	0.338471	0.0513791
2009-11-04	13.558	15.7812	-1.36496	0				2009-11-04	13.0686	12.4839	-0.353272	0				2009-11-04	11.4459	12.7943	1.25519	0.0226643
2009-11-05	14.0787	16.2725	1.86917	0				2009-11-05	12.932	12.0427	-1.83688	0				2009-11-05	13.5107	14.888	2.57956	0
2009-11-06	11.6828	10.5146	1.18277	0.0415227				2009-11-06	8.89247	9.3045	-1.26324	0.105547				2009-11-06	12.5504	12.1781	1.62253	0
2009-11-07	8.65001	12.8097	0.939026	0.0195412				2009-11-07	12.7437	3.1337	-3.76462	0				2009-11-07	12.6832	16.6978	2.31024	0.0222574
2009-11-08	12.0188	17.6531	4.91571	0				2009-11-08	10.2619	14.589	1.28973	0				2009-11-08	12.6601	17.356	4.15869	0
2009-11-09	12.1931	13.6391	3.44046	0				2009-11-09	12.1425	6.86703	-4.08551	0				2009-11-09	12.921	14.6295	2.57532	0
2009-11-10	11.9373	16.849	2.91501	0				2009-11-10	12.3872	9.23321	-3.27612	0				2009-11-10	12.9682	17.868	4.96344	0
2009-11-11	12.0528	17.3585	2.31259	0.103623				2009-11-11	11.1507	7.45145	1.18234	0.0107352				2009-11-11	13.0223	19.4197	3.03885	0.0270992
2009-11-12	10.4965	10.3332	-1.36133	0				2009-11-12	8.6389	7.6825	-0.875	0.0314929				2009-11-12	8.73044	9.71017	0.0821228	0.0341343
2009-11-13	11.6374	8.60049	-1.62985	0				2009-11-13	11.1288	11.3787	2.20608	0				2009-11-13	11.3131	10.1844	-0.718231	0.0416135
2009-11-14	12.1908	3.65408	-1.83597	0				2009-11-14	10.6006	10.8149	0.997284	0				2009-11-14	10.0701	12.6186	2.49408	0.0522218
2009-11-15	12.1039	6.48483	-2.75409	0				2009-11-15	8.55296	8.28995	-1.59525	0				2009-11-15	2.30409	8.40832	-0.0717468	1.96499
2009-11-16	9.16235	1.29227	-3.54227	0				2009-11-16	10.141	9.96576	-2.9473	0				2009-11-16	5.90989	3.40112	-3.11337	0.510647
2009-11-17	11.8284	3.15964	-2.98456	0				2009-11-17	10.6948	11.1242	0.562225	0				2009-11-17	5.83279	0.39856	-5.90366	1.275
2009-11-18	11.8044	3.53763	-3.56818	0				2009-11-18	10.9143	6.51181	-4.35288	0				2009-11-18	6.22978	1.69095	-7.20847	0.113371
2009-11-19	11.6862	7.31903	-2.01773	0				2009-11-19	11.2923	7.91333	-3.52591	0				2009-11-19	11.461	4.70633	-5.42209	0
2009-11-20	11.1447	9.88116	-1.94525	0				2009-11-20	10.973	11.6291	-0.856384	0				2009-11-20	10.0093	5.59741	-3.42337	0.0899332
2009-11-21	10.9113	6.10904	-2.17172	0				2009-11-21	10.062	8.86002	0.550934	0				2009-11-21	9.43104	2.80832	-5.57123	0.0302374
2009-11-22	8.28705	6.63492	-3.30438	0.315041				2009-11-22	9.38732	9.81186	0.52652	0.0492169				2009-11-22	10.7142	1.67883	-9.06122	0.016172
2009-11-23	10.3771	3.30618	-3.51215	0.02007				2009-11-23	10.2992	8.22885	-1.4884	0.0295642				2009-11-23	11.3862	2.32556	-7.0303	0
2009-11-24	11.0559	6.67374	-2.81348	0				2009-11-24	10.0233	7.81848	-2.08066	0				2009-11-24	10.4238	4.98529	-4.71024	0
2009-11-25	10.4551	7.0343	-1.97397	0				2009-11-25	9.35233	9.99774	0.419647	0.0150262				2009-11-25	8.37826	4.34058	-4.50748	0
2009-11-26	9.45718	3.17108	-3.26578	0				2009-11-26	8.64541	3.43811	-6.34531	0.00955604				2009-11-26	10.3687	3.09604	-6.56503	0
2009-11-27	10.6848	3.7796	-3.46991	0				2009-11-27	10.7212	3.05246	-6.91388	0				2009-11-27	9.58885	3.32956	-6.50626	0
2009-11-28	9.89536	5.0321	-2.64569	0				2009-11-28	9.94011	5.18753	-6.85998	0				2009-11-28	7.24838	1.58292	-7.86649	0.0194153
2009-11-29	9.366	10.7198	-0.844788	0				2009-11-29	10.2074	-0.605133	-10.7415	0				2009-11-29	10.6524	1.47	-8.68097	0
2009-11-30	10.1535	12.7779	-5.15271	0.539413				2009-11-30	9.83377	4.07123	-5.47778	0				2009-11-30	10.2153	2.50534	-7.79568	0
2009-12-01	5.25	-5.4664	-10.5379	0.059772				2009-12-01	8.99136	5.71228	-5.40445	0				2009-12-01	8.81357	2.44363	-7.30075	0.0576705
2009-12-02	10.5741	2.49445	-10.6783	0				2009-12-02	9.94984	1.74948	-5.87106	0				2009-12-02	6.52839	2.33844	-6.16849	0.007673
2009-12-03	10.0446	4.7894	-7.53888	0				2009-12-03	9.41535	2.92633	-6.88852	0				2009-12-03	9.88448	6.50714	-2.6666	0
2009-12-04	10.0578	1.70627	-6.01267	0				2009-12-04	9.7658	5.42166	-5.49435	0				2009-12-04	9.85032	7.05167	-3.05759	0
2009-12-05	9.64528	3.36646	-7.892	0				2009-12-05	7.88364	5.38666	-4.41132	0.0568471				2009-12-05	9.74836	10.0287	-1.41373	0.00819591
2009-12-06	8.47784	3.56378	-8.202	0				2009-12-06	3.86649	1.19327	-6.93399	0				2009-12-06	6.04228	2.30933	-7.1825	0.262649
2009-12-07	9.88507	2.70074	-9.03091	0				2009-12-07	9.60854	2.16055	-6.84229	0				2009-12-07	6.25059	-3.59064	-11.4768	0.0744581
2009-12-08	9.68514	0.417572	-9.02808	0				2009-12-08	9.64332	4.45474	-4.74228	0				2009-12-08	6.98927	-1.90192	-11.7813	0.0296091
2009-12-09	9.5627	-0.38797	-9.79273	0				2009-12-09	9.67478	7.4108	-3.11609	0				2009-12-09	7.06558	5.14645	-2.00085	0.0236043
2009-12-10	9.58731	1.71799	-8.64999	0				2009-12-10	9.83814	6.20908	-2.24146	0				2009-12-10	9.44803	3.42658	-10.2968	0.067515
2009-12-11	9.10433	2.82834	-8.96609	0.00847278				2009-12-11	4.47965	4.08063	-5.55142	0.13655				2009-12-11	7.30278	-7.66498	-15.2049	0.0439457
2009-12-12	7.08929	4.40326	-4.44391	0.00979816				2009-12-12	3.68575	1.20987	-6.65802	0.104501				2009-12-12	9.77497	0.1232	-13.7854	0
2009-12-13	7.09999	1.56848	-11.0538	0.010008				2009-12-13	4.8445	0.402313	-8.58829	0.130616				2009-12-13	10.0244	0.402924	-9.85153	0
2009-12-14	10.2954	-2.47739	-12.0743	0				2009-12-14	7.27183	2.51218	-7.87451	0.0302208				2009-12-14	9.90622	1.14423	-8.616	0
2009-12-15	8.72753	-1.13849	-10.6472	0				2009-12-15	8.26833	5.4277	-6.24188	0				2009-12-15	9.73381	-0.981995	-7.94937	0
2009-12-16	9.24229	0.401062	-9.93533	0.0180128				2009-12-16	9.08055	1.2388	-7.67364	0				2009-12-16	9.12184	2.27121	-6.58011	0
2009-12-17	4.06959	-5.13495	-12.4835	0				2009-12-17	5.24531	-2.74365	-12.7901	0				2009-12-17	6.05679	2.29971	-6.06708	0
2009-12-18	3.5959	-6.75836	-13.4938	0.0435708				2009-12-18	8.79894	-7.19019	-17.8328	0.0227679				2009-12-18	9.07419	4.51636	-4.8558	0
2009-12-19	9.24544	-7.80261	-15.0467	0				2009-12-19	10.1308	-3.98572	-15.105	0				2009-12-19	9.35256	6.89542	-3.4307	0
2009-12-20	9.82039	-7.70682	-15.3737	0				2009-12-20	7.44281	-1.34955	-12.1422	0.00869009				2009-12-20	9.54319	5.12924	-3.9967	0
2009-12-21	9.94604	-6.35623	-16.1265	0				2009-12-21	9.16279	-5.19785	-14.7357	0.0412792				2009-12-21	9.81542	6.67157	-3.85992	0
2009-12-22	9.82391	-4.69061	-15.9961	0				2009-12-22	9.71486	-8.8172	-17.5115	0.0328839				2009-12-22	9.33403	5.52573	-6.52271	0
2009-12-23	9.94328	-3.34293	-15.7522	0				2009-12-23	9.62905	-0.920227	-16.4999	0.0931825				2009-12-23	9.68023	3.78421	-7.17368	0
2009-12-24	9.5725	-5.09824	-15.0862	0				2009-12-24	3.65333	-6.14194	-13.3591	3.35258				2009-12-24	9.37223	5.87293	-5.6395	0
2009-12-25	9.53261	-6.37509	-15.6885	0				2009-12-25	8.46124	-0.568481	-11.1364	0				2009-12-25	8.25669	-0.91629	-8.56857	0
2009-12-26	7.55803	-3.78723	-14.8284	0				2009-12-26	6.41358	-6.8338	-15.3229	0				2009-12-26	6.22002	-3.12909	-10.4915	0.00961139
2009-12-27	9.87739	0.733124	-14.8849	0				2009-12-27	9.4566	-5.3313	-17.1131	0.0285269				2009-12-27	6.76156	-1.25549	-10.4535	0.0253407
2009-12-28	9.88048	3.95105	-12.2559	0				2009-12-28	8.93024	-3.91797	-13.3479	0.144258				2009-12-28	9.55581	4.14633	-7.73917	0
2009-12-29	10.1492	4.00607	-10.8902	0				2009-12-29	9.14216	4.59869	-6.22977	0				2009-12-29	9.56902	7.0882	-5.74615	0
2009-12-30	9.53891	5.11185	-10.1272	0				2009-12-30	9.61838	10.4769	-3.75854	0				2009-12-30	9.4009	4.58017	-5.87076	0.0225077
2009-12-31	9.74127	0.958832	-10.6419	0				2009-12-31	9.07196	2.67828	-7.62924	0.00859109				2009-12-31	5.21689	-1.16757	-10.4798	0.0255678
2010-01-01	9.6349	3.4942	-9.95038	0				2010-01-01	9.57985	0.998444	-9.48825	0				2010-01-01	9.67571	1.70023	-10.4262	0
2010-01-02	7.89578	2.23627	-8.22977	0.017691				2010-01-02	9.37697	7.21371	-3.85043	0				2010-01-02	8.96971	3.82028	-5.28323	0
2010-01-03	5.57217	-3.2941	-11.5912	0.0215712				2010-01-03	9.083	7.36432	-4.03998	0				2010-01-03	8.24003	4.24234	-7.1882	0
2010-01-04	10.3031	-2.27762	-13.1308	0				2010-01-04	10.0376	8.29767	-7.12787	0				2010-01-04	9.90681	5.75668	-7.25851	0
2010-01-05	10.3837	0.178009	-13.6504	0				2010-01-05	9.58609	4.64505	-7.65829	0				2010-01-05	9.9773	6.9776	-4.9259	0
2010-01-06	10.0048	0.601227	-12.5014	0				2010-01-06	9.80803	0.0531616	-7.20731	0				2010-01-06	4.56014	5.07544	-6.59372	0
2010-01-07	9.65297	-4.63638	-12.7611	0				2010-01-07	9.73845	6.9036	-6.78378	0				2010-01-07	6.32902	0.999695	-8.52377	0.154507
2010-01-08	6.09171	-4.21423	-12.1473	0.00253202				2010-01-08	3.44586	-4.98377	-14.723	0.479996				2010-01-08	5.99082	-0.399292	-9.4697	0.286744
2010-01-09	5.30265	-1.96347	-12.6974	0				2010-01-09	9.51263	-9.08304	-17.6767	0				2010-01-09	5.59038	-0.837494	-10.7656	0.10692
2010-01-10	9.61249	2.86655	-10.6846	0				2010-01-10	10.579	-2.39206	-15.2677	0				2010-01-10	6.95347	-4.5282	-11.8107	0
2010-01-11	9.04826	-2.8222	-13.368	0				2010-01-11	10.2249	-0.858215	-12.1745	0				2010-01-11	7.98678	-4.28507	-14.218	0
2010-01-12	10.1095	0.147797	-14.1084	0				2010-01-12	10.332	0.204742	-12.0358	0				2010-01-12	10.0357	-3.69183	-15.7653	0
2010-01-13	10.4814	0.60849	-14.4181	0				2010-01-13	0.959565	-1.3396	-11.6779	0.457764				2010-01-13	8.41494	-1.39227	-13.2864	0.0236154
2010-01-14	9.8549	1.68198	-11.8594	0				2010-01-14	9.98378	-1.90714	-11.8767	0				2010-01-14	8.54494	0.427582	-11.331	0
2010-01-15	10.5733	6.92563	-9.94568	0				2010-01-15	9.93382	-0.387176	-9.45373	0				2010-01-15	4.66878	-4.457	-14.1532	0.120139
2010-01-16	10.3372	6.46298	-6.23236	0.255493				2010-01-16	9.47928	0.987335	-11.1116	0				2010-01-16	8.01101	-9.9772	-17.147	0.00961581
2010-01-17	4.42814	-5.50131	-11.2171	0.0572384				2010-01-17	10.7145	-1.90134	-11.1198	0				2010-01-17	8.83259	-2.04349	-13.4274	0
2010-01-18	11.3003	4.76196	-10.3706	0				2010-01-18	10.0859	-1.91379	-12.4567	0				2010-01-18	11.3749	2.92175	-12.6395	0
2010-01-19	10.759	5.05908	-9.29196	0				2010-01-19	9.73664	-0.183106	-12.2932	0				2010-01-19	10.9725	1.64392	-9.55951	0
2010-01-20	8.73672	-5.59058	-14.7601	0				2010-01-20	10.422	1.84039	-7.5296	0.0345045				2010-01-20	10.9322	2.19107	-9.26028	0
2010-01-21	10.9894	-2.61517	-15.3958	0.0791025				2010-01-21	10.6088	-2.12979	-11.5494	0				2010-01-21	10.9266	4.10141	-8.47293	0
2010-01-22	8.98838	-5.84186	-16.2431	0				2010-01-22	10.5248	1.32983	-8.97134	0				2010-01-22	10.3999	3.75281	-7.95944	0
2010-01-23	11.5581	-14.3692	-23.4646	0				2010-01-23	11.1279	5.52405	-7.52982	0				2010-01-23	7.31795	4.70904	-6.1976	0
2010-01-24	12.7468	-6.25449	-25.2518	0				2010-01-24	8.69564	6.81448	-4.00272	0				2010-01-24	11.8095	3.79697	-4.25809	0
2010-01-25	9.5821	2.00836	-12.8473	0				2010-01-25	11.4684	6.38013	-6.78748	0				2010-01-25	11.6788	7.8826	-4.07278	0
2010-01-26	12.0551	4.9751	-10.7264	0				2010-01-26	11.574	8.285	-3.0939	0				2010-01-26	9.84049	5.20392	-9.11966	0
2010-01-27	10.8841	1.12036	-8.09796	0				2010-01-27	10.1554	9.4967	-1.67349	0				2010-01-27	7.8287	-9.67328	-18.0749	0
2010-01-28	7.49012	1.09018	-9.5195	0.075003				2010-01-28	8.59973	8.53973	-2.23209	0				2010-01-28	13.1692	-9.02875	-19.6691	0
2010-01-29	10.4103	-0.749176	-11.197	0.0103482				2010-01-29	8.10956	2.85583	-9.61151	0.00846784				2010-01-29	8.99701	1.11752	-10.2301	0.0053045
2010-01-30	12.5211	1.73871	-12.6494	0				2010-01-30	10.618	-2.84784	-14.9803	0				2010-01-30	11.5821	3.26935	-8.551	0
2010-01-31	12.4467	-1.68567	-9.93079	0				2010-01-31	11.6106	5.04599	-9.25778	0				2010-01-31	12.6581	7.63858	-4.00186	0
2010-02-01	11.6816	5.27817	-10.7631	0				2010-02-01	12.2446	3.69769	-7.85217	0				2010-02-01	12.2808	6.88785	-4.15823	0
2010-02-02	9.0654	3.42233	-6.65567	0.0313881				2010-02-02	12.4256	5.94766	-4.21451	0				2010-02-02	12.5974	8.20923	-6.00034	0
2010-02-03	11.6823	3.18149	-8.50629	0				2010-02-03	12.4339	5.40909	-3.74063	0				2010-02-03	9.93565	0.781342	-8.97635	0
2010-02-04	13.5688	6.80835	-7.07333	0				2010-02-04	11.7573	8.47223	-5.22714	0				2010-02-04	10.2015	3.41592	-8.5932	0
2010-02-05	13.0729	7.4252	-3.80264	0				2010-02-05	12.5189	7.60507	-4.4884	0				2010-02-05	9.25126	12.4236	-2.89456	0.1021
2010-02-06	10.5862	0.563538	-9.93857	0				2010-02-06	12.7317	11.0122	1.14273	0.458695				2010-02-06	6.33841	-0.624298	-8.45218	0.391927
2010-02-07	7.55639	-4.08035	-12.3382	0				2010-02-07	4.46	2.63434	-7.37415	0.320326				2010-02-07	9.58507	-1.5936	-12.3419	0.0380616
2010-02-08	12.514	-0.768921	-14.5265	0				2010-02-08	12.648	6.24603	-6.52896	0.0893943				2010-02-08	11.1425	0.796539	-12.2029	0.00964048
2010-02-09	10.0097	2.2507	-9.55865	0				2010-02-09	7.93526	-3.09558	-11.4819	0.0874756				2010-02-09	10.3826	-2.2215	-10.958	0.0142139
2010-02-10	14.2769	5.5025	-8.36072	0				2010-02-10	14.0322	-0.355743	-13.9461	0				2010-02-10	13.8592	-0.797516	-12.9147	0
2010-02-11	14.1074	9.25967	-6.42767	0				2010-02-11	13.7323	9.16846	-6.13852	0				2010-02-11	14.5318	2.55511	-11.3034	0
2010-02-12	13.7379	10.0928	-3.39395	0				2010-02-12	11.6311	-0.096405	-7.81668	0.0258881				2010-02-12	14.4557	5.09442	-9.29144	0
2010-02-13	14.4916	10.1786	-3.27652	0				2010-02-13	14.623	2.03805	-9.68805	0				2010-02-13	14.4756	6.97208	-4.99789	0
2010-02-14	14.2702	12.2488	-1.12122	0				2010-02-14	14.6007	5.90384	-7.25678	0				2010-02-14	14.853	7.31491	-4.49255	0
2010-02-15	12.0025	9.96558	-1.52664	0				2010-02-15	13.7132	7.9263	-3.0639	0				2010-02-15	14.696	7.51837	-2.94223	0
2010-02-16	12.7266	14.3869	-1.66528	0				2010-02-16	13.7508	7.66739	-3.13351	0				2010-02-16	14.303	6.36243	-3.80313	0
2010-02-17	12.8602	14.08	-0.433807	0.13203				2010-02-17	9.11356	8.17285	-3.38876	0				2010-02-17	14.8344	12.248	-0.277954	0.0132803
2010-02-18	0.701292	1.8057	-1.72171	3.56251				2010-02-18	13.1745	11.7857	-1.56369	0.0205533				2010-02-18	7.88037	6.14221	-2.98486	0
2010-02-19	8.43606	-1.41357	-4.96228	0.106292				2010-02-19	12.56	9.42648	-1.05621	0.0145218				2010-02-19	15.8227	15.3443	0.577911	0
2010-02-20	16.1708	3.25577	-5.94803	0				2010-02-20	15.4055	13.8581	-0.00354004	0				2010-02-20	8.65586	8.6069	-2.14444	0.0183462
2010-02-21	16.4826	9.87936	-4.19107	0				2010-02-21	14.0366	9.90921	-2.32974	0				2010-02-21	10.1103	4.82004	-4.87299	0.0290215
2010-02-22	15.8919	8.77338	-3.43161	0				2010-02-22	14.0526	11.6509	-4.36996	0				2010-02-22	14.481	12.9146	-2.19486	0
2010-02-23	14.5899	6.69665	-4.23953	0.0588545				2010-02-23	15.5416	8.59262	-3.71982	0				2010-02-23	14.4266	16.1121	-0.73703	0.0071519
2010-02-24	6.80563	1.38916	-3.41653	0.169575				2010-02-24	15.6621	8.33139	-1.50577	0				2010-02-24	6.82109	6.48846	-1.83572	1.12906
2010-02-25	14.04	5.80337	-3.40414	0.0252934				2010-02-25	12.6475	11.463	-1.32977	0.0282645				2010-02-25	7.93861	4.39682	-4.33472	0.223348
2010-02-26	12.7204	6.23138	-3.21634	0.0475144				2010-02-26	15.9994	7.01035	-2.15723	0				2010-02-26	7.01672	5.11618	-5.79712	1.36504
2010-02-27	9.35772	3.74796	-3.27066	0.030449				2010-02-27	15.6136	13.0848	-1.01382	0				2010-02-27	8.8583	2.30878	-9.12161	0.11011
2010-02-28	13.4442	9.97913	-2.03839	0.0157886				2010-02-28	13.1064	11.8543	0.589081	0.012255				2010-02-28	14.9773	4.52411	-4.74972	0.00860029
2010-03-01	16.2501	13.6621	-0.34079	0.0160577				2010-03-01	13.6141	11.4523	1.85818	0				2010-03-01	14.4806	5.24435	-5.52591	0.0205005
2010-03-02	15.9343	12.4286	-0.0384521	0.0446661				2010-03-02	15.1725	10.1888	-0.0984497	0				2010-03-02	17.3624	4.31265	-7.78412	0
2010-03-03	13.8851	17.3087	5.6257	0.0565418				2010-03-03	14.3845	13.7439	2.33484	0.0778848				2010-03-03	18.8909	6.1965	-5.06515	0
2010-03-04	11.78	13.9903	4.37442	0.383206				2010-03-04	14.5506	15.3354	2.35739	0.0327534				2010-03-04	18.8901	9.37711	-1.42685	0
2010-03-05	13.275	11.3152	-0.752838	0				2010-03-05	10.7417	13.079	-2.99963	1.87451				2010-03-05	18.7879	14.1326	0.771332	0
2010-03-06	19.017	15.3798	-1.32532	0				2010-03-06	15.4854	4.50531	-8.24673	0.0371217				2010-03-06	19.1061	14.5587	3.30322	0
2010-03-07	18.0682	15.1267	0.761536	0.0474511				2010-03-07	16.5022	9.10568	-3.24118	0				2010-03-07	18.8462	17.302	4.20874	0
2010-03-08	3.29323	7.3537	-1.7634	0.904053				2010-03-08	12.2163	8.2515	-1.58133	0.0264999				2010-03-08	18.9463	16.3713	2.22012	0
2010-03-09	9.27942	6.86935	-2.28903	0.160023				2010-03-09	7.52912	5.71921	-5.04312	0.107734				2010-03-09	7.7738	7.63867	-0.307617	0.0799307
2010-03-10	11.6036	10.0745	0.474945	0.94265				2010-03-10	19.0845	9.15561	-1.96954	0				2010-03-10	18.8048	12.974	0.366943	0
2010-03-11	20.1722	13.6628	-0.704376	0.0107642				2010-03-11	19.5386	9.89969	-1.22363	0				2010-03-11	16.9537	14.3356	2.32471	0.149822
2010-03-12	12.5598	15.0322	0.987244	1.56358				2010-03-12	16.2885	11.0523	-2.20239	0.0684757				2010-03-12	13.7543	13.2319	1.44037	0.0638101
2010-03-13	6.27867	2.0376	-2.64273	0.54195				2010-03-13	15.0339	13.5804	1.01944	0.0347541				2010-03-13	19.8135	18.9958	4.63144	0
2010-03-14	19.4445	6.40689	-3.42593	0				2010-03-14	18.1699	15.1176	2.7059	0				2010-03-14	20.9155	14.314	-0.877991	0
2010-03-15	15.9587	11.7103	0.0938721	0				2010-03-15	14.2315	14.9926	4.07074	1.75744				2010-03-15	22.577	9.35336	-1.03473	0
2010-03-16	9.97537	10.7437	1.14572	0.0717658				2010-03-16	5.78131	9.26483	0.16217	0.202551				2010-03-16	21.5474	16.8953	1.97363	0.0155109
2010-03-17	15.9748	14.5588	4.74597	0				2010-03-17	17.528	15.5886	-1.0181	0.302844				2010-03-17	20.3706	16.5838	4.5278	0
2010-03-18	15.9475	14.2015	3.27924	0.0134863				2010-03-18	9.27954	-2.11258	-8.44809	0.309334				2010-03-18	22.0619	23.2367	6.08878	0
2010-03-19	18.4976	19.1857	5.84973	0.0842285				2010-03-19	20.0219	3.78506	-8.15811	0				2010-03-19	19.703	20.4254	7.20377	0
2010-03-20	7.67915	9.72714	2.1568	0.225684				2010-03-20	19.8537	1.22952	-4.24817	0				2010-03-20	19.8766	26.2862	11.0062	0
2010-03-21	14.9825	10.745	1.9372	0.0521827				2010-03-21	20.8451	14.2958	-1.9776	0				2010-03-21	10.8136	12.534	2.58777	0.0213287
2010-03-22	9.47249	7.16186	0.832306	0.0363914				2010-03-22	16.9565	12.6673	1.5798	0.0132735				2010-03-22	18.6647	8.01813	-1.07956	0
2010-03-23	20.4303	10.1988	-0.235138	0.115643				2010-03-23	7.72565	7.46768	-2.15085	0.784591				2010-03-23	22.3066	9.40659	-0.898438	0
2010-03-24	12.2309	9.14563	1.0433	0.13096				2010-03-24	11.5918	6.92935	-1.4888	0.0635309				2010-03-24	22.739	8.38406	-2.67893	0
2010-03-25	15.0689	9.67905	2.13324	0.0453955				2010-03-25	14.0244	9.367	-2.03702	0.0731409				2010-03-25	22.7809	10.1278	-1.68436	0
2010-03-26	17.0539	13.0751	2.03751	0.0849374				2010-03-26	10.4207	8.54886	-1.69455	5.98087				2010-03-26	17.6683	10.1223	-1.44846	0.0573461
2010-03-27	18.6083	12.9957	3.54822	0.171486				2010-03-27	9.2103	9.48636	-1.32034	1.50741				2010-03-27	10.7782	10.8433	1.96414	0.63396
2010-03-28	19.9774	15.2151	2.97037	0.148483				2010-03-28	12.0494	9.72324	0.644348	0.0696219				2010-03-28	20.9144	26.7497	10.0982	0
2010-03-29	19.5349	16.8875	6.18375	0.0983741				2010-03-29	21.935	12.3435	0.982452	0.0509696				2010-03-29	22.4791	28.0394	13.0084	0
2010-03-30	23.5276	18.4186	6.51575	0				2010-03-30	21.9433	14.8542	2.62485	0.0724103				2010-03-30	22.741	30.2503	13.74	0.293983
2010-03-31	23.3137	22.2307	6.89328	0				2010-03-31	20.0342	19.7306	7.83905	0				2010-03-31	4.60104	8.84122	-2.2204	5.58765
2010-04-01	21.8883	21.0897	0.668854	3.64703				2010-04-01	18.2878	16.3228	3.56317	3.40508				2010-04-01	15.6348	7.44058	-2.75668	0.800689
2010-04-02	23.0998	8.75903	-1.95416	0				2010-04-02	21.4665	12.4712	1.70077	0.0593567				2010-04-02	22.4189	12.9104	1.8204	0.260669
2010-04-03	25.6357	7.11493	-1.66589	0				2010-04-03	14.6789	12.3043	1.78659	0.498386				2010-04-03	14.7781	11.8736	2.58328	0.164022
2010-04-04	24.0688	15.1761	2.03659	0.0308496				2010-04-04	22.6346	18.4119	4.90689	0.0403619				2010-04-04	23.7544	13.9066	3.39648	0.17974
2010-04-05	24.6567	15.8663	3.71539	0				2010-04-05	20.8573	17.6316	6.74692	0.28935				2010-04-05	11.6089	10.9663	2.23498	0.35651
2010-04-06	24.3252	19.6764	3.96747	0.0280293				2010-04-06	20.6678	18.988	7.19785	0				2010-04-06	16.3709	11.6148	2.58328	0.209834
2010-04-07	18.9633	15.1067	2.00345	0.0249194				2010-04-07	15.7501	16.1336	6.72562	0.334021				2010-04-07	21.7278	15.2884	4.94577	0
2010-04-08	25.5326	9.45563	-1.16058	0				2010-04-08	14.8088	5.62323	-4.35724	0.188871				2010-04-08	24.2988	19.5917	9.10886	0
2010-04-09	21.5877	16.5865	0.914154	0				2010-04-09	24.5418	6.52783	-2.59457	0.0019721				2010-04-09	23.6172	22.3276	10.3113	0.0413808
2010-04-10	20.1871	12.7732	3.95386	0				2010-04-10	24.8396	10.4341	-0.181946	0				2010-04-10	16.5761	12.7669	3.47894	0.0389727
2010-04-11	23.2055	13.748	3.85385	0.0681619				2010-04-11	23.9586	9.54273	-0.260712	0				2010-04-11	23.8145	13.9762	4.9342	0
2010-04-12	20.5632	15.7469	4.53403	0.070709				2010-04-12	24.915	13.0781	2.70166	0				2010-04-12	25.5132	18.6095	-0.408112	0
2010-04-13	20.3831	16.7499	3.63971	0.0146167				2010-04-13	24.4522	17.8389	6.71759	0				2010-04-13	25.9029	14.523	2.31998	0
2010-04-14	25.0124	15.5772	1.50128	0				2010-04-14	22.1992	24.2304	9.98129	0				2010-04-14	24.8902	19.4047	5.96838	0
2010-04-15	26.0162	17.4291	1.71951	0.0106854				2010-04-15	26.5465	20.6851	7.79895	0				2010-04-15	22.5589	23.721	10.2026	0
2010-04-16	12.2784	14.5683	5.43301	2.51549				2010-04-16	26.0352	26.9813	11.9498	0				2010-04-16	21.7763	24.4636	12.7623	0.027721
2010-04-17	22.0317	16.646	5.99936	0.200326				2010-04-17	26.4335	30.9157	16.0806	0				2010-04-17	20.9948	23.1198	10.4183	0.110262
2010-04-18	26.3858	16.5302	6.92871	0.00305214				2010-04-18	21.212	32.0514	17.245	0				2010-04-18	13.4211	16.0583	6.89444	0.089325
2010-04-19	25.2174	13.3297	4.3085	0				2010-04-19	22.5875	28.6399	17.1441	0				2010-04-19	24.063	21.617	10.3941	0
2010-04-20	25.7037	18.1824	5.48083	0				2010-04-20	1.51893	23.1746	13.7296	3.13395				2010-04-20	8.49384	12.1766	7.47247	6.75781
2010-04-21	25.987	24.7867	10.8697	0.0304347				2010-04-21	23.7499	22.0586	12.0661	0				2010-04-21	15.3156	14.9815	5.7016	0.234308
2010-04-22	21.4166	17.7439	1.93466	0.0109023				2010-04-22	13.4128	16.9081	7.28415	2.30249				2010-04-22	23.467	20.7264	10.6519	0.199877
2010-04-23	27.9522	9.93362	0.347504	0				2010-04-23	24.7781	15.0794	6.11771	0.143612				2010-04-23	23.1462	24.3427	10.5977	0.73348
2010-04-24	22.5255	12.5644	2.2713	0				2010-04-24	24.4004	14.9178	5.62381	0				2010-04-24	8.21178	8.99698	3.73428	4.00755
2010-04-25	17.5001	14.9645	6.6174	0.363322				2010-04-25	20.5529	16.4864	4.90207	0.634378				2010-04-25	21.9183	11.029	3.53152	0.0923137
2010-04-26	25.712	19.2786	7.71912	0				2010-04-26	17.8125	11.9418	3.39688	0.162159				2010-04-26	17.7643	14.2026	5.42007	0.0574719
2010-04-27	25.0112	22.5505	12.1808	0				2010-04-27	22.945	16.7158	4.82114	0.0466353				2010-04-27	15.7405	15.634	7.5025	0
2010-04-28	23.8634	21.6832	12.6085	6.30818				2010-04-28	26.7323	19.9389	8.89297	0				2010-04-28	23.659	19.3007	8.74625	0.0355627
2010-04-29	20.6064	19.3379	9.47165	0.0854426				2010-04-29	25.2061	24.3463	11.5671	0.0286505				2010-04-29	23.3731	20.5846	7.62015	0
2010-04-30	22.0304	17.9825	6.86835	0.378656				2010-04-30	25.1546	24.5589	10.2898	0.0418424				2010-04-30	16.2881	12.4135	6.12964	9.76068
2010-05-01	26.4505	16.2464	2.94934	0				2010-05-01	26.2788	26.0339	12.7196	0				2010-05-01	9.93609	8.79623	3.02066	2.36133
2010-05-02	28.8073	17.1985	3.31027	0.0118247				2010-05-02	24.9378	32.6473	17.071	0.052969				2010-05-02	23.3207	13.4215	3.02389	0.0253093
2010-05-03	28.7174	23.6904	10.0615	0				2010-05-03	14.5066	20.6605	13.9479	0.57745				2010-05-03	26.627	21.7521	10.5211	0
2010-05-04	28.3161	26.1898	13.2642	0				2010-05-04	14.3098	18.9253	7.27206	0.150689				2010-05-04	27.859	23.7513	13.8775	0.0759226
2010-05-05	20.3853	24.6981	12.9094	1.23655				2010-05-05	18.3457	17.8546	7.064	0				2010-05-05	25.2829	24.2025	13.6648	0.428147
2010-05-06	21.1943	21.9625	11.2782	0.0577474				2010-05-06	27.0881	21.6729	8.41257	0				2010-05-06	27.198	23.2597	8.31845	0
2010-05-07	27.8633	24.6468	12.3556	0				2010-05-07	27.9353	19.513	9.17545	0				2010-05-07	27.3929	18.7929	9.2189	0
2010-05-08	28.9377	25.8608	15.0079	0				2010-05-08	19.3427	24.3966	14.1236	0.620933				2010-05-08	25.3021	21.7462	12.3727	0.303941
2010-05-09	28.4138	33.311	17.7207	0				2010-05-09	25.5716	28.4658	13.1437	0.508286				2010-05-09	23.222	23.3207	12.4167	0.0277997
2010-05-10	12.6103	20.7029	10.2219	1.02283				2010-05-10	12.6278	21.6304	14.52	1.13058				2010-05-10	26.4658	27.5385	16.4913	0.328757
2010-05-11	2.7848	9.94473	4.21945	3.04192				2010-05-11	7.09949	18.6775	12.4915	7.79956				2010-05-11	15.8801	22.0126	15.0436	0.801782
2010-05-12	20.5846	11.2783	5.66745	0.0272303				2010-05-12	11.8992	15.9849	8.87421	4.63317				2010-05-12	22.6551	23.2086	10.2557	0
2010-05-13	22.0928	14.9456	7.90866	0				2010-05-13	16.2829	15.5964	7.03558	0.715794				2010-05-13	27.3841	21.9235	11.5575	0
2010-05-14	29.6962	20.3563	9.47656	0.0025323				2010-05-14	24.2201	17.7674	7.9314	0.0611935				2010-05-14	27.902	23.6152	13.2472	0.239846
2010-05-15	26.3179	22.3899	13.2149	0.145202				2010-05-15	22.607	20.4285	11.0039	0.105784				2010-05-15	27.4787	25.0046	14.3089	0
2010-05-16	17.8465	19.0822	10.8077	3.88768				2010-05-16	18.7741	20.3463	12.1202	0				2010-05-16	27.1293	26.814	16.6235	0.132722
2010-05-17	28.7229	22.535	11.7906	0.0114982				2010-05-17	27.6094	24.2303	13.1973	0				2010-05-17	24.2299	27.5377	15.6608	0
2010-05-18	27.551	25.9204	14.8495	0.0310399				2010-05-18	22.5573	24.2298	14.8778	0.0117234				2010-05-18	28.68	27.2724	18.2407	0
2010-05-19	26.4319	30.7014	17.3846	0				2010-05-19	22.8171	22.7922	11.3484	0.763704				2010-05-19	29.4494	31.8462	16.9699	0
2010-05-20	14.4127	27.6112	10.0153	0.0317799				2010-05-20	26.6455	20.6617	11.6506	0.169613				2010-05-20	28.9821	33.2794	20.682	0.0484175
2010-05-21	9.173	13.2362	8.10797	0.744817				2010-05-21	29.6047	19.7836	10.5071	0				2010-05-21	28.1265	30.8807	22.1679	0.0532821
2010-05-22	19.3836	19.6969	10.6244	0.0543982				2010-05-22	30.0718	24.1307	12.5852	0				2010-05-22	26.7757	28.7218	16.7789	0
2010-05-23	14.9021	20.3688	12.4762	0.295768				2010-05-23	28.411	29.0693	16.5745	0				2010-05-23	29.2958	26.9764	16.6881	0
2010-05-24	12.114	18.7491	14.6278	4.67841				2010-05-24	26.3422	30.0729	17.7177	0.0868277				2010-05-24	28.4559	31.8798	19.4965	0
2010-05-25	10.9319	19.8604	15.2535	0.350662				2010-05-25	27.5842	30.1119	17.7998	0.178971				2010-05-25	26.7866	29.5654	17.5491	0.174779
2010-05-26	13.3776	21.3195	17.7483	1.76371				2010-05-26	27.6623	26.9789	17.5348	0				2010-05-26	13.6781	18.1131	10.9565	7.72818
2010-05-27	26.4744	26.8528	19.146	0.592013				2010-05-27	22.8057	25.1257	12.2203	6.09925				2010-05-27	27.9476	23.9231	14.3067	0.0762881
2010-05-28	18.9001	22.3275	15.741	1.1026				2010-05-28	17.6804	22.1547	10.9318	2.09055				2010-05-28	19.8862	22.4792	14.2974	0.940304
2010-05-29	15.1164	21.882	11.4828	0.104905				2010-05-29	25.4602	23.0722	13.1486	0.128501				2010-05-29	27.2027	25.2849	16.177	0
2010-05-30	28.8126	25.4356	14.2707	0				2010-05-30	29.1571	25.8189	15.967	0				2010-05-30	28.3999	27.7768	16.4827	0.371638
2010-05-31	26.73	28.4269	17.2602	0				2010-05-31	20.6718	25.8544	16.5269	0.195402				2010-05-31	11.2895	20.1933	14.2548	5.10791
2010-06-01	29.1832	29.1122	16.842	0.0253687				2010-06-01	17.4239	23.9452	15.5636	2.13925				2010-06-01	29.3249	25.7843	16.4909	0.200041
2010-06-02	29.3397	28.7587	18.4343	0				2010-06-02	25.1917	25.6695	16.136	0.414995				2010-06-02	17.928	22.7129	15.7218	3.83246
2010-06-03	29.6556	31.9936	20.3519	0.100968				2010-06-03	31.2655	29.1811	18.2858	0				2010-06-03	7.90636	19.4145	14.0283	2.84505
2010-06-04	26.8894	32.4804	21.6444	0.166625				2010-06-04	31.0066	32.8236	19.8723	0.256665				2010-06-04	23.1532	23.366	15.22	1.43027
2010-06-05	25.1153	28.8406	20.3558	1.89951				2010-06-05	27.5161	33.8114	20.2453	0.242331				2010-06-05	27.2987	23.6226	13.5313	0
2010-06-06	25.4297	30.8696	22.0886	0.814927				2010-06-06	28.5957	28.808	19.4083	0.128603				2010-06-06	29.2919	25.2023	16.3798	0.0603045
2010-06-07	9.11874	28.0029	19.4056	0.383848				2010-06-07	23.3485	28.0161	19.769	0.106174				2010-06-07	26.8959	25.3072	17.9431	0.250614
2010-06-08	23.6506	30.6663	12.7009	0.474952				2010-06-08	20.7121	26.1755	18.1277	0.201866				2010-06-08	21.3748	25.5327	17.4059	0.429062
2010-06-09	29.3746	22.3266	10.1543	0				2010-06-09	27.2492	28.0163	18.2554	0				2010-06-09	16.6482	22.8301	16.2249	20.7408
2010-06-10	30.3007	23.6067	11.3954	0				2010-06-10	29.0717	29.8366	20.9768	0.121949				2010-06-10	28.4642	26.0767	15.595	0.109365
2010-06-11	29.7001	25.6576	13.3857	0				2010-06-11	28.315	31.5233	21.7308	0				2010-06-11	29.6334	27.8616	19.1514	0
2010-06-12	31.0685	27.3781	14.261	0				2010-06-12	27.8122	30.8968	21.7398	0				2010-06-12	27.1766	29.6627	18.6961	0.979648
2010-06-13	28.8972	25.9206	16.1147	0				2010-06-13	29.4348	32.1411	21.6268	0				2010-06-13	23.845	26.8021	16.2191	0
2010-06-14	28.2972	27.6194	16.9591	0				2010-06-14	27.6884	32.2701	21.2581	0				2010-06-14	28.3157	25.8392	16.7293	0
2010-06-15	27.366	29.1519	18.4526	0				2010-06-15	16.7862	27.6482	15.6471	1.56518				2010-06-15	27.7754	28.8838	19.6416	0.0603275
2010-06-16	27.8322	30.1462	20.4273	0.0653916				2010-06-16	3.75805	16.4073	12.3513	3.32378				2010-06-16	27.175	35.0822	22.9287	2.52991
2010-06-17	14.9769	25.748	18.7795	0.266956				2010-06-17	19.2658	22.0409	13.5856	1.06427				2010-06-17	23.6544	29.7859	23.1186	4.82835
2010-06-18	20.2176	29.5012	18.6381	0.972632				2010-06-18	29.094	28.616	16.8728	0.245689				2010-06-18	15.0296	26.5053	16.2668	5.15865
2010-06-19	26.4437	25.3269	15.9619	0.444838				2010-06-19	26.7306	28.2781	17.4399	0.157474				2010-06-19	5.49087	19.1616	13.2712	2.03626
2010-06-20	26.7457	28.1169	15.6228	0.108694				2010-06-20	7.65467	22.6703	17.8842	1.67985				2010-06-20	4.69721	18.7554	13.3111	5.78313
2010-06-21	29.8761	27.2205	15.8651	0				2010-06-21	24.3351	26.3189	17.839	2.44281				2010-06-21	11.4522	18.8885	12.9368	1.70331
2010-06-22	27.6011	29.3514	18.3176	0.731203				2010-06-22	9.5387	18.4366	13.8841	2.6541				2010-06-22	16.2172	20.7234	15.7122	0.168185
2010-06-23	21.9868	28.1016	19.0797	0.150333				2010-06-23	28.0899	27.6623	16.0766	0				2010-06-23	27.149	25.5982	16.1079	0
2010-06-24	27.8932	31.3312	21.3271	0.0830744				2010-06-24	25.1769	28.0956	15.7708	0.014588				2010-06-24	29.6992	26.9508	15.3933	0.119373
2010-06-25	15.8858	26.7899	20.9486	8.75986				2010-06-25	25.8004	27.3642	16.6092	0.19091				2010-06-25	29.7138	26.7486	16.2902	0
2010-06-26	16.5421	23.1649	17.4258	6.90301				2010-06-26	27.908	29.3516	16.8836	0.0720512				2010-06-26	29.5077	28.4593	19.6019	0.41485
2010-06-27	27.001	26.4037	18.1992	0.144844				2010-06-27	28.4168	29.5684	17.985	0.0741539				2010-06-27	19.6045	24.2858	17.8779	1.99515
2010-06-28	24.72	29.0346	19.5453	0.0989166				2010-06-28	24.8507	26.8814	17.4264	1.13432				2010-06-28	25.9168	25.0673	15.0421	0.0623124
2010-06-29	21.6288	28.6368	20.2021	0.0289187				2010-06-29	26.2776	26.6077	18.552	1.87471				2010-06-29	27.6056	27.0264	16.6442	0.0895997
2010-06-30	25.1706	29.9672	21.2175	0.0944275				2010-06-30	27.4598	28.2218	19.8362	0.243912				2010-06-30	24.0795	24.5599	12.7262	0.0676714
2010-07-01	25.4853	30.6179	21.1108	2.92987				2010-07-01	27.4694	28.8735	20.1837	0.386939				2010-07-01	28.3976	25.8129	18.5903	0
2010-07-02	25.7751	29.1866	22.0833	0.439933				2010-07-02	26.0522	28.3454	20.6173	0.564434				2010-07-02	28.5044	28.1836	19.3746	0.107427
2010-07-03	25.9969	30.2498	22.4998	0.00419592				2010-07-03	26.8782	30.0914	20.9539	0.177668				2010-07-03	22.1788	26.2152	16.4939	1.60131
2010-07-04	13.6601	25.2452	20.0166	1.41284				2010-07-04	23.6519	30.5278	21.8434	0				2010-07-04	15.9931	21.7768	13.5921	1.47788
2010-07-05	20.2297	29.0421	22.3979	0.191139				2010-07-05	19.4334	31.1419	20.168	0				2010-07-05	20.3661	23.7226	15.0948	0.206888
2010-07-06	24.4491	34.9438	22.2948	12.1095				2010-07-06	21.5405	23.1194	16.7056	0.271988				2010-07-06	27.8247	26.8745	15.5265	0
2010-07-07	12.1119	19.3951	15.1494	2.14057				2010-07-07	29.3877	23.8957	16.6726	0				2010-07-07	27.9588	26.5705	16.068	0.100926
2010-07-08	27.8356	29.5804	19.0007	0				2010-07-08	27.7625	26.6624	17.0771	0				2010-07-08	25.7213	26.6268	16.4252	0
2010-07-09	26.0043	30.1114	20.4303	0.138117				2010-07-09	27.1428	32.0869	20.9826	0.118191				2010-07-09	27.9707	27.7541	16.0517	0
2010-07-10	24.8833	29.879	20.7949	0.415852				2010-07-10	23.467	32.4787	21.9282	0.252489				2010-07-10	28.0684	28.6925	20.6709	0
2010-07-11	12.3489	23.7208	18.8648	0.276932				2010-07-11	3.98666	21.9602	17.684	8.09523				2010-07-11	26.7235	29.2873	19.8695	0.121214
2010-07-12	26.9937	30.7734	19.0623	0.316905				2010-07-12	25.6554	29.8986	20.0406	0.0195505				2010-07-12	25.8449	30.4703	20.6504	0.126329
2010-07-13	29.5326	32.8871	19.2197	0				2010-07-13	7.50766	23.8879	16.0319	7.24148				2010-07-13	11.2181	23.7779	17.4238	0
2010-07-14	27.3526	29.7442	20.2219	0				2010-07-14	7.94705	21.8333	13.9878	0.444041				2010-07-14	25.9638	30.0927	20.4416	0
2010-07-15	24.6524	31.1715	22.6919	0.0792836				2010-07-15	13.8728	23.5898	16.1053	0				2010-07-15	27.2268	32.1041	20.0743	0
2010-07-16	14.8201	26.1276	20.6575	25.7624				2010-07-16	28.7678	29.633	16.3087	0				2010-07-16	25.9256	32.8124	22.5418	0
2010-07-17	15.1963	22.4816	17.2302	6.16956				2010-07-17	19.9254	28.9581	18.7409	0.0483109				2010-07-17	27.6387	33.154	22.2599	0
2010-07-18	27.4321	26.6783	17.8538	0.0354922				2010-07-18	19.6917	24.7564	17.8462	0.470412				2010-07-18	27.8084	34.4466	23.279	0
2010-07-19	27.8199	29.8012	20.4777	0.0181902				2010-07-19	28.6848	28.4922	19.4551	0.0629555				2010-07-19	22.541	29.7471	21.3681	3.64212
2010-07-20	26.1879	32.0575	22.3381	0				2010-07-20	24.6731	27.3397	20.2428	0.0391241				2010-07-20	18.9349	27.4489	18.1896	0.247927
2010-07-21	20.2911	29.3188	22.0952	3.599				2010-07-21	20.2635	26.8679	21.3625	0.277551				2010-07-21	19.5839	26.2534	21.4704	4.00682
2010-07-22	1.12852	22.1095	17.2384	3.99354				2010-07-22	8.68146	28.7224	20.5242	0.719519				2010-07-22	5.92006	27.0579	19.086	8.7316
2010-07-23	12.4929	24.4613	20.8875	1.22047				2010-07-23	22.1247	29.2026	21.03	0.130781				2010-07-23	17.6736	27.8824	19.7979	0.34193
2010-07-24	24.9392	29.9283	22.1575	1.15595				2010-07-24	24.9921	30.6405	22.1371	0				2010-07-24	23.3048	29.4267	21.9557	0.443925
2010-07-25	21.4861	29.357	22.987	2.07647				2010-07-25	27.9374	33.012	23.3453	0.10148				2010-07-25	13.7027	28.3174	19.0514	1.52308
2010-07-26	4.62396	23.3032	18.1466	5.19223				2010-07-26	19.4433	32.8109	23.1551	0				2010-07-26	18.5296	30.682	22.2144	8.63406
2010-07-27	4.91117	18.9495	14.6295	6.51615				2010-07-27	6.87718	29.7237	20.8242	0.0692727				2010-07-27	16.9072	29.8144	22.8347	4.59539
2010-07-28	24.701	28.2128	18.2188	0				2010-07-28	20.3503	28.138	20.7523	0.488523				2010-07-28	11.0632	25.309	18.0716	0.347527
2010-07-29	26.1675	29.9174	21.1569	0				2010-07-29	28.3055	30.6089	20.233	0.0204915				2010-07-29	27.9128	29.4654	20.6625	0.0291465
2010-07-30	20.8939	28.0374	21.499	0.38947				2010-07-30	24.9095	31.0801	21.6479	0				2010-07-30	28.3536	30.5274	13.2958	0
2010-07-31	23.1262	26.8465	19.636	0.6197				2010-07-31	28.0521	32.4779	20.8299	0				2010-07-31	28.896	31.55	18.3437	0
2010-08-01	9.37996	20.3857	17.8183	4.81732				2010-08-01	28.4457	30.9711	19.7581	0				2010-08-01	28.3328	33.0416	21.372	0
2010-08-02	19.1737	22.6801	16.9408	3.72813				2010-08-02	26.3853	31.9934	20.5985	0				2010-08-02	24.8236	32.939	23.2987	0.164936
2010-08-03	20.1812	24.6519	17.5796	0.128955				2010-08-03	22.2202	27.6614	21.4943	1.6639				2010-08-03	17.7239	30.1281	22.7056	0.343452
2010-08-04	21.4792	25.0131	18.1887	0				2010-08-04	23.4287	27.2663	20.1369	1.02505				2010-08-04	17.6346	28.7042	20.1212	0.873249
2010-08-05	20.9103	23.7169	15.8796	1.09496				2010-08-05	23.9292	27.386	19.8821	0.851642				2010-08-05	17.7929	30.1084	22.4093	2.5061
2010-08-06	23.5888	23.7867	16.8536	1.36697				2010-08-06	21.7807	27.0604	19.4585	2.0105				2010-08-06	15.6316	27.1906	19.9629	0.699945
2010-08-07	24.2842	26.2091	17.7021	0				2010-08-07	20.154	29.544	19.6167	0.282829				2010-08-07	24.9183	29.2029	21.9467	0
2010-08-08	23.9896	27.1554	19.3528	0.216169				2010-08-08	21.5207	31.5865	21.4425	0.0936827				2010-08-08	13.6241	25.6184	19.0587	3.15273
2010-08-09	20.0533	26.8914	19.7583	0.6568				2010-08-09	23.7695	32.1084	22.4172	0.0778551				2010-08-09	19.4004	26.7323	16.9907	0.0110848
2010-08-10	19.5557	25.044	17.991	0.872557				2010-08-10	22.9429	30.7968	22.0426	0.511822				2010-08-10	26.8661	32.7853	17.3126	0
2010-08-11	23.4571	26.0137	18.2552	0.756426				2010-08-11	26.5112	32.0329	21.5876	0.278407				2010-08-11	27.3921	32.4821	17.8335	0
2010-08-12	19.2958	25.658	18.1758	0				2010-08-12	23.9189	36.2332	22.5674	0				2010-08-12	27.4492	32.278	18.7058	0
2010-08-13	25.2842	27.4667	18.3536	0.0795803				2010-08-13	19.2372	35.3111	24.005	0.0677468				2010-08-13	27.7207	32.544	22.129	0
2010-08-14	25.311	27.7487	17.9529	1.98167				2010-08-14	26.2512	37.3793	23.548	0				2010-08-14	25.0025	33.1197	21.3729	0
2010-08-15	24.738	26.3078	17.8568	0				2010-08-15	25.0481	37.1359	23.8697	0				2010-08-15	24.061	31.0261	21.1083	1.51408
2010-08-16	24.7038	27.8017	17.9663	0				2010-08-16	24.1774	37.2755	23.8998	0.0203237				2010-08-16	20.9954	27.5771	20.0092	1.58812
2010-08-17	23.903	27.7702	17.9371	0.175337				2010-08-17	21.1465	33.0255	21.9142	0.731099				2010-08-17	22.6693	26.9056	17.9257	0.938739
2010-08-18	24.6517	26.5967	18.3862	0				2010-08-18	22.6368	35.8416	20.5743	0.0872232				2010-08-18	24.542	26.022	18.6947	0.531883
2010-08-19	24.4986	27.3112	17.9349	0				2010-08-19	25.8397	35.5504	23.2906	0				2010-08-19	23.8951	25.7799	18.6616	0.0238546
2010-08-20	23.747	27.2728	18.2317	0.0562296				2010-08-20	24.976	35.6028	22.3832	0				2010-08-20	21.3529	28.0982	18.2605	0.207792
2010-08-21	22.2655	26.4254	18.6596	0.011186				2010-08-21	26.394	35.5548	22.5008	0				2010-08-21	23.8054	27.141	17.3624	0.540635
2010-08-22	20.1016	27.1634	19.7879	0				2010-08-22	25.2539	38.7545	23.0788	0				2010-08-22	24.6595	26.3674	15.5925	0
2010-08-23	8.27619	21.8982	17.8595	1.24404				2010-08-23	23.9441	36.7337	23.6681	0.347623				2010-08-23	23.8123	25.7043	18.0035	0.588226
2010-08-24	9.48495	19.2041	17.5767	0.776147				2010-08-24	22.5505	31.12	17.4809	30.7637				2010-08-24	15.9113	24.9829	16.5072	0.84783
2010-08-25	23.139	27.4411	17.439	0.123695				2010-08-25	1.41355	14.3086	10.7457	14.7568				2010-08-25	18.823	28.4986	16.0212	0.0438939
2010-08-26	25.2362	29.9188	18.0592	0				2010-08-26	9.79011	13.2096	8.08353	4.94165				2010-08-26	25.8417	26.6117	13.1406	0
2010-08-27	20.8966	30.3024	19.929	0.929457				2010-08-27	8.45694	14.2366	10.0827	0.644022				2010-08-27	24.8625	27.1034	16.5073	0.278055
2010-08-28	17.9579	23.8719	15.1227	0.579683				2010-08-28	23.9619	24.9301	15.0016	0				2010-08-28	23.7209	28.112	17.3258	0.14248
2010-08-29	18.0738	20.6104	12.0286	0.310194				2010-08-29	20.9439	28.2201	17.387	0.162876				2010-08-29	24.0043	30.2835	17.972	0.0976488
2010-08-30	22.0604	23.9443	13.5807	0				2010-08-30	16.9037	27.8817	17.7642	11.3332				2010-08-30	22.8204	31.5641	20.4077	0
2010-08-31	23.9466	24.6453	14.3566	0				2010-08-31	12.2345	15.6651	11.5572	3.32225				2010-08-31	23.7594	33.168	20.2372	0.19584
2010-09-01	23.0342	26.0271	15.5678	0.137361				2010-09-01	20.417	19.8992	11.16	0.344943				2010-09-01	23.5625	29.8459	15.4925	0
2010-09-02	21.7094	25.9041	16.2373	0.718769				2010-09-02	17.2562	21.831	14.1445	0.619582				2010-09-02	18.4905	24.9781	15.9019	0.907848
2010-09-03	22.9351	27.2953	16.3913	0.254872				2010-09-03	16.3222	22.2943	14.9538	3.0516				2010-09-03	14.6372	26.3006	16.9225	0.578286
2010-09-04	21.2632	27.6611	16.3573	0.14069				2010-09-04	14.9942	24.4322	14.2738	1.4566				2010-09-04	17.0398	28.2681	17.2913	1.65649
2010-09-05	6.26438	20.886	14.6335	0.361954				2010-09-05	18.7916	24.5649	16.9621	0.345601				2010-09-05	17.8723	26.2292	17.4196	3.03113
2010-09-06	20.5938	25.9703	15.0957	0.349449				2010-09-06	20.2124	24.8592	14.3266	0.0965475				2010-09-06	7.59635	18.3524	12.3362	13.1841
2010-09-07	19.7905	24.3151	14.8262	0.354952				2010-09-07	21.4798	18.8708	12.309	0.235516				2010-09-07	15.1701	16.3093	9.07626	0.217165
2010-09-08	22.5165	25.3655	14.5668	0.0295489				2010-09-08	21.475	21.626	10.5979	0.0923406				2010-09-08	19.6408	19.18	8.87448	0.0126239
2010-09-09	21.4279	27.1918	15.5943	0.109848				2010-09-09	11.8149	20.999	12.4595	7.89595				2010-09-09	21.4084	23.3372	11.8543	0.797166
2010-09-10	13.2145	23.3633	16.1831	0.129883				2010-09-10	14.1776	21.5695	12.7729	0.486694				2010-09-10	20.8636	24.358	12.9197	0.509652
2010-09-11	11.0307	21.0028	9.47421	3.8443				2010-09-11	10.4197	19.1112	11.0081	0.0679333				2010-09-11	16.7622	21.6697	12.4135	0.363567
2010-09-12	21.9778	18.0616	10.3611	0				2010-09-12	21.025	19.249	7.96448	0				2010-09-12	17.8431	21.1974	12.7129	0.162991
2010-09-13	20.6091	26.2279	12.4307	0				2010-09-13	20.622	17.3509	7.18588	0				2010-09-13	7.2414	16.5615	10.3468	0.540222
2010-09-14	17.8114	26.2385	15.3118	0.194239				2010-09-14	20.2943	23.5411	11.5001	0				2010-09-14	19.7237	23.3408	11.5649	0.207268
2010-09-15	12.5658	21.7172	14.6948	0.293913				2010-09-15	20.9771	23.2252	13.319	0.112186				2010-09-15	21.5304	23.5516	9.32831	0
2010-09-16	5.10531	18.4042	14.4579	2.89666				2010-09-16	20.025	23.5286	13.4574	0				2010-09-16	22.2084	25.1762	11.8839	0
2010-09-17	5.78854	17.1562	12.4574	2.92978				2010-09-17	20.0545	26.2105	15.7528	0				2010-09-17	21.735	25.5479	14.1494	0
2010-09-18	7.98158	18.8151	12.4428	0.307311				2010-09-18	20.2497	25.9529	14.4783	0.271327				2010-09-18	14.6054	21.6206	12.0595	5.06736
2010-09-19	20.8578	24.914	12.7274	0				2010-09-19	14.342	26.9733	14.001	9.15506				2010-09-19	20.8198	20.1347	7.81781	0
2010-09-20	21.068	27.4327	14.4132	0.103777				2010-09-20	16.409	22.3362	13.9492	0.156482				2010-09-20	21.7428	18.4459	7.95547	0
2010-09-21	19.4721	27.2351	14.3077	0.133998				2010-09-21	10.9611	19.0062	10.5374	0.78951				2010-09-21	21.3105	20.7238	10.4485	0
2010-09-22	17.2854	26.1378	12.6733	0.093939				2010-09-22	6.4538	16.4952	9.33017	4.23961				2010-09-22	20.5574	24.4096	9.49512	0
2010-09-23	16.7736	20.2524	11.5499	0				2010-09-23	14.9542	20.2954	10.0075	0.126271				2010-09-23	18.0466	23.4197	10.6721	0.374107
2010-09-24	19.9285	25.3575	11.9343	0.0519786				2010-09-24	12.1811	17.9323	10.8315	0.739314				2010-09-24	20.2326	21.4617	9.99683	0.231392
2010-09-25	9.02531	18.6956	5.22342	0.0665856				2010-09-25	18.214	12.9402	4.47006	0				2010-09-25	15.4472	21.8326	11.0636	0.248754
2010-09-26	20.4149	15.7861	3.54752	0				2010-09-26	18.7965	18.7226	6.70688	0.264889				2010-09-26	17.2069	24.1254	11.0401	0.822044
2010-09-27	19.2788	18.4623	3.42593	0				2010-09-27	20.2989	18.343	7.74182	0.0855308				2010-09-27	17.7564	26.9134	12.8355	0.308691
2010-09-28	18.1135	22.0085	7.39636	0				2010-09-28	18.6762	24.684	11.4116	0.0557953				2010-09-28	15.0346	24.299	13.0528	0.464659
2010-09-29	12.9975	20.8188	9.87274	0.0228533				2010-09-29	16.5427	24.0171	11.9354	0				2010-09-29	11.5224	22.5901	10.6533	0.222088
2010-09-30	16.5772	16.1284	3.43008	0				2010-09-30	15.3745	26.4582	11.1112	3.85968				2010-09-30	9.80158	20.5929	10.9719	0.109637
2010-10-01	20.4874	21.7414	4.35986	0				2010-10-01	10.2023	14.5153	5.61276	0.557421				2010-10-01	18.8636	25.6288	12.869	0.035145
2010-10-02	19.0338	27.0419	8.33426	0				2010-10-02	13.2401	16.7065	6.8284	0.178686				2010-10-02	10.0493	21.5467	9.31732	0.265267
2010-10-03	16.4926	20.4681	9.71082	1.45503				2010-10-03	7.86508	16.9502	7.12509	4.47499				2010-10-03	11.7355	21.4351	10.0953	0.379807
2010-10-04	16.0335	18.2889	9.33148	0.29171				2010-10-04	10.1249	15.2522	6.07629	1.06775				2010-10-04	10.4396	17.4978	4.32428	0.386477
2010-10-05	14.7691	17.9674	3.00452	0				2010-10-05	9.76398	15.3586	5.04898	0.304354				2010-10-05	18.539	19.5653	6.97122	0
2010-10-06	17.7564	16.7971	2.10217	0				2010-10-06	11.8264	18.0192	4.78418	0.69922				2010-10-06	16.7932	20.2465	9.19846	0.0532706
2010-10-07	17.6156	23.0526	4.9758	0				2010-10-07	17.0422	19.3122	7.13663	0.531489				2010-10-07	7.98043	15.1421	5.54718	0.62429
2010-10-08	18.5209	18.4855	6.45505	0				2010-10-08	16.862	21.5535	9.13104	0.0705859				2010-10-08	15.9434	21.6482	7.15088	0.0217097
2010-10-09	17.6366	25.224	7.17169	0.876077				2010-10-09	16.4573	23.2047	11.2522	0				2010-10-09	8.73947	15.3483	6.24783	5.45412
2010-10-10	0.218932	11.2857	3.00986	0.0627681				2010-10-10	13.9018	22.6657	10.0174	0				2010-10-10	5.51545	12.3922	2.53909	0.267898
2010-10-11	17.3255	14.7253	3.05722	0				2010-10-11	14.2759	19.5932	9.21994	0				2010-10-11	14.0779	13.9308	4.39194	0.152164
2010-10-12	16.8343	19.6959	5.26898	0				2010-10-12	14.4587	13.9365	4.60346	0				2010-10-12	12.2847	13.6639	5.46054	0.244064
2010-10-13	17.4584	20.243	4.85379	0				2010-10-13	15.7711	13.2199	2.7579	0				2010-10-13	16.3611	20.9918	5.96329	0
2010-10-14	12.0008	16.7284	4.78738	0.282279				2010-10-14	14.3692	18.1874	4.75433	2.54868				2010-10-14	17.3878	23.6242	5.01721	0
2010-10-15	10.4039	16.5941	5.15707	0.0483539				2010-10-15	9.91348	15.4144	6.95697	1.80409				2010-10-15	16.6814	23.4955	11.6174	0.0348055
2010-10-16	14.6007	17.8366	4.68338	0				2010-10-16	12.0207	13.801	4.77682	0				2010-10-16	12.3516	22.9574	6.40268	0
2010-10-17	15.6503	19.445	5.51975	0				2010-10-17	14.2636	13.3826	4.05212	0				2010-10-17	16.6191	18.7828	4.65872	0
2010-10-18	16.2713	20.0479	6.14539	0				2010-10-18	14.2675	15.7038	5.05237	0				2010-10-18	15.5585	20.0166	5.08353	0.175786
2010-10-19	15.6204	23.0451	9.73749	0				2010-10-19	16.1825	13.7396	2.94641	0				2010-10-19	15.8151	22.0749	7.58319	0
2010-10-20	15.4122	26.1168	9.51547	0				2010-10-20	15.2607	13.1504	2.24143	0				2010-10-20	13.6793	20.1613	6.17645	0
2010-10-21	13.0415	10.5074	-0.134613	0.138463				2010-10-21	15.4251	10.7385	1.36066	0				2010-10-21	14.6026	23.5728	9.25281	0.0166667
2010-10-22	15.5678	10.8539	-0.623444	0				2010-10-22	15.2794	13.555	1.64957	0				2010-10-22	8.10562	18.4658	8.20789	0.257428
2010-10-23	14.9515	15.3057	-0.0904541	0.0574309				2010-10-23	15.7143	15.2602	4.41824	0				2010-10-23	4.24831	14.8375	6.3577	1.29439
2010-10-24	14.9272	19.385	3.04929	0.0773579				2010-10-24	14.8957	16.465	4.89627	0				2010-10-24	13.9839	20.4155	5.33951	0.0284575
2010-10-25	10.3113	12.2389	5.47971	0.417123				2010-10-25	14.7022	17.3574	4.74863	0				2010-10-25	12.4613	18.1219	-0.593872	0.0322758
2010-10-26	14.1092	19.2559	6.52045	0.384167				2010-10-26	14.1509	15.3769	4.6362	0				2010-10-26	15.0138	16.0922	4.05841	0
2010-10-27	11.5691	12.5561	2.9498	0.268328				2010-10-27	10.0846	17.7465	3.81207	0.161812				2010-10-27	14.1238	15.8618	-0.361694	0
2010-10-28	13.6695	15.4861	3.20612	0				2010-10-28	12.0944	17.6831	4.78766	0.143272				2010-10-28	14.75	14.1718	-0.140472	0
2010-10-29	11.138	21.7811	3.5881	0.690759				2010-10-29	13.0274	13.3435	2.72348	0.0561718				2010-10-29	14.5941	20.8025	4.01819	0
2010-10-30	4.95633	7.94443	-0.441559	0.0596855				2010-10-30	12.5894	9.12973	-2.09799	0.137933				2010-10-30	14.0129	17.633	1.73849	0
2010-10-31	7.10721	7.35611	-4.66186	0.24215				2010-10-31	13.0947	11.8657	1.50857	0				2010-10-31	11.5597	10.0468	-1.41513	0.045594
2010-11-01	12.2227	2.99893	-5.57999	0				2010-11-01	14.0403	12.0067	0.705109	0				2010-11-01	13.9873	18.8346	4.26968	0.0158952
2010-11-02	13.4729	8.59525	-4.34491	0				2010-11-02	13.7147	13.4929	0.279663	0				2010-11-02	13.6392	21.1235	5.00174	0.0138568
2010-11-03	14.3931	12.1586	-2.27435	0.0148045				2010-11-03	13.0011	14.4574	1.80771	0				2010-11-03	7.91175	9.61237	-6.16019	0.969894
2010-11-04	13.0398	13.4975	-0.396118	0				2010-11-04	12.6148	15.6682	3.18942	0				2010-11-04	13.6897	11.0796	-4.83963	0
2010-11-05	11.6253	14.409	-0.634064	0.0855249				2010-11-05	11.925	11.9619	1.26596	0.102699				2010-11-05	13.3401	18.2705	2.79114	0.0187983
2010-11-06	1.56231	13.3714	0.289764	1.59002				2010-11-06	11.8125	7.74454	-2.49808	0.139562				2010-11-06	3.85542	4.17474	-4.85596	0.550863
2010-11-07	11.3131	16.5514	-0.376282	0.0158962				2010-11-07	12.5331	5.08008	-3.21872	0				2010-11-07	13.0819	0.985504	-6.6828	0
2010-11-08	11.8606	20.7782	-1.10007	0.182507				2010-11-08	13.2017	10.1476	-0.0166321	0				2010-11-08	12.9319	11.7493	0.0553284	0
2010-11-09	12.3006	5.63348	-4.43036	0				2010-11-09	11.4185	5.73392	-2.85538	0				2010-11-09	13.2806	13.8742	0.210968	0
2010-11-10	13.2767	4.80576	-4.12711	0				2010-11-10	9.64072	9.05408	0.0829163	0				2010-11-10	12.3288	14.8098	1.69607	0
2010-11-11	11.4153	8.91254	-0.548462	0				2010-11-11	4.515	6.57339	-2.63217	0.598498				2010-11-11	12.2769	13.0329	1.06384	0
2010-11-12	12.4292	10.6055	-0.882721	0				2010-11-12	6.48236	6.85922	-2.89075	0.233469				2010-11-12	12.4129	17.1885	1.08298	0
2010-11-13	11.6658	12.0261	-0.531097	0				2010-11-13	11.5319	7.11633	-2.68124	0				2010-11-13	12.0057	14.0196	0.876679	0
2010-11-14	9.11108	13.8585	0.416473	0.00273023				2010-11-14	12.2254	9.44919	-0.685944	0				2010-11-14	11.6752	14.1103	1.24649	0
2010-11-15	5.0281	7.97159	-3.0159	1.96497				2010-11-15	11.4704	10.0891	0.101227	0				2010-11-15	11.676	15.1116	1.23154	0
2010-11-16	10.3114	3.19907	-4.6629	0.0126771				2010-11-16	11.6113	11.0415	0.432526	0				2010-11-16	9.48247	10.4268	0.615387	0
2010-11-17	11.9951	2.42065	-5.07739	0				2010-11-17	8.92641	10.3561	0.227936	0				2010-11-17	9.95952	12.2226	0.413605	0
2010-11-18	11.2366	6.61331	-4.4996	0.0153472				2010-11-18	7.49952	8.98459	0.0314026	0.023767				2010-11-18	6.1794	6.15781	-3.04916	0.0599574
2010-11-19	11.2177	5.25101	-2.43573	0				2010-11-19	10.8952	10.0967	-0.751251	0				2010-11-19	10.0439	4.47589	-4.92209	0
2010-11-20	10.441	4.66357	-2.09537	0				2010-11-20	10.8895	10.6762	-0.405884	0				2010-11-20	9.06446	0.893433	-6.37735	0.0258851
2010-11-21	11.2007	9.06888	-3.2279	0				2010-11-21	7.44763	7.24771	-0.837738	0.0397943				2010-11-21	11.1374	4.32791	-5.45633	0
2010-11-22	11.0037	3.05002	-4.30191	0.0134255				2010-11-22	8.54498	5.50641	-2.26675	0.0844747				2010-11-22	6.90243	2.03091	-4.90738	0.0333076
2010-11-23	10.5678	3.65671	-3.43014	0.027977				2010-11-23	10.4951	3.60611	-4.57443	0				2010-11-23	7.24469	0.585693	-8.0354	0.14604
2010-11-24	10.6849	4.55756	-3.04587	0				2010-11-24	10.8888	8.4501	-3.41953	0				2010-11-24	8.65204	-1.49591	-8.64523	0
2010-11-25	10.4943	6.47379	-2.17056	0				2010-11-25	8.15501	3.87112	-3.02066	0.0146514				2010-11-25	10.5744	-0.20871	-9.63998	0
2010-11-26	9.13081	4.41568	-2.05441	0				2010-11-26	10.3902	0.795654	-6.79105	0.00480592				2010-11-26	10.807	0.17865	-10.2692	0
2010-11-27	10.5	5.43808	-2.40115	0				2010-11-27	9.81772	4.84158	-4.73535	0.127824				2010-11-27	10.6515	2.30075	-9.70074	0
2010-11-28	10.365	6.92395	-2.18503	0				2010-11-28	10.0432	-0.470764	-8.67069	0.0544344				2010-11-28	10.1536	5.29541	-5.59174	0
2010-11-29	10.1613	8.29227	-1.78442	0				2010-11-29	8.71118	3.76114	-7.58075	0				2010-11-29	10.2475	7.86142	-3.85687	0
2010-11-30	10.1644	7.39706	-2.74887	0.0117129				2010-11-30	10.1334	4.77286	-2.70499	0				2010-11-30	9.69423	2.31433	-4.84656	0.025189
2010-12-01	9.88535	5.21133	-3.06	0.00876752				2010-12-01	9.73127	2.64136	-5.59735	0.00829442				2010-12-01	10.4199	2.80518	-6.74243	0
2010-12-02	6.64751	6.62744	-2.75275	0				2010-12-02	9.39679	0.945953	-6.97199	0.0113924				2010-12-02	10.1275	5.95535	-6.16711	0
2010-12-03	9.8933	5.28378	-2.50815	0				2010-12-03	8.67935	-1.26535	-7.83279	0.00737293				2010-12-03	9.8574	2.34933	-6.18375	0
2010-12-04	9.28074	8.47482	-2.00873	0				2010-12-04	8.28486	3.93402	-7.71008	0				2010-12-04	9.70903	4.42612	-6.42447	0
2010-12-05	9.48877	14.201	-1.55585	0				2010-12-05	9.47983	7.75211	-5.51764	0				2010-12-05	9.48957	6.36093	-4.6871	0
2010-12-06	8.80204	13.0763	-1.0932	0				2010-12-06	9.37713	6.07068	-1.34479	0				2010-12-06	5.22383	0.0697937	-7.56268	0.00326434
2010-12-07	8.93878	10.8385	-1.67557	0				2010-12-07	5.7503	5.91946	-4.23675	0				2010-12-07	9.1519	-2.14337	-11.8651	0
2010-12-08	9.65748	11.5179	-2.21625	0				2010-12-08	9.08192	5.89194	-4.04373	0				2010-12-08	9.78844	3.5358	-8.58145	0
2010-12-09	9.62131	11.4722	-2.67929	0				2010-12-09	9.5329	5.69742	-4.43124	0				2010-12-09	9.21984	4.87024	-8.40359	0
2010-12-10	9.50002	8.66678	-3.44687	0				2010-12-10	9.85641	5.35309	-5.42197	0				2010-12-10	8.81667	3.08731	-10.2866	0
2010-12-11	8.36704	10.0532	-4.1987	0.0355096				2010-12-11	9.23151	4.79385	-5.48789	0				2010-12-11	9.56823	0.890686	-11.5035	0
2010-12-12	3.71256	4.15323	-4.43195	0.0310486				2010-12-12	8.33907	2.43271	-6.73007	0				2010-12-12	9.80751	1.26157	-10.5644	0
2010-12-13	9.28421	6.64475	-4.97842	0				2010-12-13	8.83712	3.44131	-6.75687	0				2010-12-13	9.8483	1.15762	-10.1062	0
2010-12-14	9.54403	8.98016	-4.75894	0				2010-12-14	8.59769	5.37286	-6.47092	0				2010-12-14	9.80786	-1.63205	-13.0911	0
2010-12-15	7.5228	7.23746	-3.92896	0.022043				2010-12-15	8.38609	6.54837	-0.90329	0.0220629				2010-12-15	10.1988	-3.79571	-13.6087	0
2010-12-16	4.8284	0.597687	-5.659	0.11252				2010-12-16	1.32294	1.08981	-7.80066	0.0286041				2010-12-16	9.00134	0.743622	-12.0847	0
2010-12-17	8.7054	0.940186	-6.2218	0				2010-12-17	9.24391	-2.87711	-10.8055	0				2010-12-17	7.72675	4.6485	-7.29697	0
2010-12-18	9.26831	5.44278	-6.34091	0				2010-12-18	9.70849	2.00796	-9.81757	0				2010-12-18	9.25062	5.59518	-7.43015	0
2010-12-19	9.17164	3.68014	-3.36563	0				2010-12-19	9.14222	2.70731	-7.06311	0				2010-12-19	5.97968	-2.10953	-9.41824	0.0376509
2010-12-20	9.34524	3.85632	-4.20517	0				2010-12-20	8.32564	6.26904	-6.4931	0				2010-12-20	4.77649	-1.74118	-10.0792	0.0886828
2010-12-21	9.68763	5.34622	-4.68487	0				2010-12-21	9.01318	5.57968	-4.14099	0				2010-12-21	8.69055	5.07108	-6.88385	0
2010-12-22	9.13253	8.36829	-3.99124	0				2010-12-22	7.686	7.17899	-5.45496	0				2010-12-22	7.76591	-0.743134	-9.60867	0
2010-12-23	7.8648	3.53296	-4.504	0.652489				2010-12-23	4.73536	3.45483	-4.64294	0.652521				2010-12-23	6.58754	2.93323	-8.45551	0
2010-12-24	0.813348	-3.07138	-8.75516	1.11755				2010-12-24	0.20451	-1.03668	-8.83209	0				2010-12-24	9.50798	6.25397	-5.1355	0
2010-12-25	6.13534	-4.93341	-10.5512	0				2010-12-25	9.09687	-2.44165	-9.34403	0				2010-12-25	8.05351	7.23447	-8.03238	0
2010-12-26	8.88821	-1.25021	-10.9295	0				2010-12-26	10.0176	2.2753	-8.96909	0				2010-12-26	9.36407	1.03595	-10.5491	0
2010-12-27	9.90229	3.31967	-9.13202	0				2010-12-27	9.76558	3.10199	-8.13358	0				2010-12-27	9.67106	-1.69663	-12.8317	0
2010-12-28	8.76878	-7.97907	-13.6453	0				2010-12-28	9.74918	4.15897	-7.37784	0				2010-12-28	9.35838	-1.68265	-14.6595	0
2010-12-29	7.70209	-5.08679	-12.7406	0				2010-12-29	9.77715	3.69931	-7.02014	0				2010-12-29	9.64933	-5.6488	-15.8444	0
2010-12-30	8.11996	-2.80789	-11.5974	0				2010-12-30	9.89792	5.08911	-7.3248	0				2010-12-30	9.98348	-1.89182	-15.2871	0
2010-12-31	10.2009	-1.76984	-12.0649	0				2010-12-31	5.3146	3.28155	-5.9028	0.00872848				2010-12-31	10.0289	0.329315	-12.5074	0
2011-01-01	9.31817	2.54745	-8.79489	0				2011-01-01	9.70456	5.67984	-4.55276	0				2011-01-01	9.60033	0.339783	-12.2771	0
2011-01-02	8.24478	4.82651	-7.14096	0.00746402				2011-01-02	9.05784	4.76691	-4.55023	0.138658				2011-01-02	9.14607	-1.46845	-13.1088	0
2011-01-03	7.5724	-1.75565	-11.4925	0.00749054				2011-01-03	8.2819	-1.90973	-9.31033	0.00717107				2011-01-03	5.78043	-1.47543	-10.7683	0.00752337
2011-01-04	6.38578	-6.20483	-13.8127	0.0150896				2011-01-04	9.69692	3.83749	-8.3454	0				2011-01-04	7.61437	-1.28833	-10.622	0.087659
2011-01-05	9.25101	-4.8313	-14.842	0.00852457				2011-01-05	9.30882	3.49289	-6.01633	0				2011-01-05	4.37019	-3.00366	-12.4001	1.89006
2011-01-06	9.69943	-1.91596	-12.8965	0				2011-01-06	6.85067	4.70532	-6.07285	0				2011-01-06	4.24338	-8.66287	-15.8759	0.187589
2011-01-07	10.5103	4.73703	-11.3631	0				2011-01-07	9.11196	3.80054	-6.48111	0				2011-01-07	4.31218	-12.5646	-18.8043	0.0608282
2011-01-08	7.7979	-0.293488	-9.37869	0				2011-01-08	10.2387	6.43887	-6.24606	0				2011-01-08	8.65258	-11.6926	-19.8681	0
2011-01-09	7.93373	1.5209	-10.1768	0				2011-01-09	9.5627	5.01706	-6.4682	0				2011-01-09	10.3171	-3.84265	-18.3909	0
2011-01-10	5.96951	-2.13934	-11.0798	0.0109397				2011-01-10	9.70513	6.43619	-5.65555	0				2011-01-10	7.23759	-7.1225	-16.9672	0
2011-01-11	9.63191	-0.413025	-11.5659	0				2011-01-11	9.05818	-0.989685	-8.76874	0				2011-01-11	10.2362	-7.94455	-18.8775	0
2011-01-12	10.6439	3.12888	-10.9159	0				2011-01-12	9.50681	5.31183	-9.83524	0				2011-01-12	10.5378	-4.86945	-18.4488	0
2011-01-13	8.34797	1.47205	-9.608	0				2011-01-13	9.69807	2.12946	-9.0665	0				2011-01-13	9.60169	-5.6571	-18.7298	0
2011-01-14	9.86875	0.583893	-11.1641	0				2011-01-14	9.68254	-7.29688	-14.6425	0				2011-01-14	9.19555	-3.51208	-16.346	0
2011-01-15	10.5568	2.70627	-11.2019	0				2011-01-15	11.0041	-1.97311	-13.3174	0				2011-01-15	11.0228	4.27905	-8.51416	0
2011-01-16	10.1524	1.98792	-10.8781	0				2011-01-16	9.81882	1.13608	-10.6364	0				2011-01-16	9.83869	5.63364	-7.38971	0
2011-01-17	11.0553	3.34976	-8.57663	0				2011-01-17	6.56557	2.9068	-8.03036	0				2011-01-17	7.61081	2.82645	-6.96298	0.0119695
2011-01-18	9.94081	1.15286	-9.49146	0				2011-01-18	10.2712	-1.75879	-10.4428	0				2011-01-18	4.12549	-1.38864	-11.3442	0.327606
2011-01-19	11.0727	-0.485596	-10.2692	0				2011-01-19	11.2648	-0.424133	-11.5655	0				2011-01-19	8.66424	-5.7721	-14.3306	0.0552893
2011-01-20	8.69946	-4.1886	-15.1578	0.384793				2011-01-20	10.2659	0.936157	-9.85907	0				2011-01-20	11.1908	-2.73267	-14.6167	0
2011-01-21	11.5896	-8.76004	-17.2184	0				2011-01-21	9.18419	0.334991	-11.2717	0				2011-01-21	11.221	2.28952	-9.8822	0
2011-01-22	11.5006	-10.7844	-18.8112	0				2011-01-22	10.9939	3.54193	-10.4869	0				2011-01-22	6.60583	-0.743134	-11.3507	0.0104818
2011-01-23	11.3114	-6.32788	-19.1161	0				2011-01-23	11.3163	1.58307	-8.79843	0				2011-01-23	11.8744	-1.81473	-13.1676	0
2011-01-24	11.9582	-0.0401611	-17.3232	0				2011-01-24	11.405	1.01462	-8.97186	0				2011-01-24	12.2373	3.21704	-9.34683	0
2011-01-25	11.5883	3.19086	-12.0692	0				2011-01-25	10.931	4.64847	-7.25702	0				2011-01-25	11.8433	6.78323	-6.94885	0
2011-01-26	6.1818	-3.38715	-10.7787	0.13743				2011-01-26	11.5023	-3.65945	-12.326	0.0257861				2011-01-26	11.4102	-1.90393	-12.3829	0
2011-01-27	3.86603	-5.30966	-11.5997	1.08736				2011-01-27	11.3977	-1.45444	-12.7458	0				2011-01-27	12.0402	-2.37299	-12.3763	0
2011-01-28	12.4754	-2.15848	-12.7116	0				2011-01-28	11.3859	1.77185	-9.57993	0				2011-01-28	12.5966	0.0493164	-12.8604	0
2011-01-29	12.1219	0.00366211	-13.9868	0				2011-01-29	10.1965	-2.9779	-10.8015	0				2011-01-29	12.4831	-1.44568	-12.927	0
2011-01-30	12.5085	1.17496	-13.8019	0				2011-01-30	10.9861	3.79202	-12.6923	0				2011-01-30	12.1465	0.731659	-12.7273	0
2011-01-31	11.8951	0.826996	-12.8234	0.269914				2011-01-31	11.312	3.1283	-7.14444	0				2011-01-31	11.9808	2.6987	-9.2767	0
2011-02-01	10.5151	-0.139008	-8.6889	0				2011-02-01	9.77243	2.89661	-7.11316	0.017883				2011-02-01	11.2967	2.50104	-8.2226	0
2011-02-02	11.2412	2.1749	-10.2517	0				2011-02-02	11.8677	7.55139	-4.37622	0				2011-02-02	9.64198	3.49753	-6.44315	0.0183154
2011-02-03	13.178	1.83533	-11.1919	0				2011-02-03	12.0144	6.92545	-3.61542	0				2011-02-03	5.34046	1.87158	-7.87985	0.149883
2011-02-04	13.8917	5.10053	-9.95566	0				2011-02-04	11.2273	6.14127	-7.15271	0				2011-02-04	12.1292	-0.423859	-12.1105	0.03906
2011-02-05	13.1479	3.90634	-8.16681	0				2011-02-05	12.1735	7.44492	-4.4715	0.0294383				2011-02-05	13.957	0.444031	-11.8673	0
2011-02-06	13.1119	1.69113	-10.2469	0				2011-02-06	13.5549	2.80594	-8.69131	0.0121955				2011-02-06	10.237	-0.0718384	-11.8567	0.0217543
2011-02-07	13.6438	4.70233	-7.24149	0				2011-02-07	12.4461	5.22598	-5.58328	0.00848691				2011-02-07	8.15671	0.691315	-9.61377	0.0932635
2011-02-08	10.0073	2.285	-6.72553	0.0159102				2011-02-08	13.4886	2.08545	-8.97208	0				2011-02-08	13.5117	-0.091095	-11.7873	0
2011-02-09	11.3883	2.26553	-10.9051	0.00738079				2011-02-09	10.1166	6.44369	-4.48581	0				2011-02-09	13.5568	3.03223	-11.5766	0
2011-02-10	14.6842	-1.60391	-13.509	0				2011-02-10	11.725	5.27881	-4.01303	0				2011-02-10	11.888	1.2803	-12.1148	0.00852993
2011-02-11	14.4933	2.48117	-12.2144	0				2011-02-11	13.6862	9.03607	-4.55093	0				2011-02-11	14.263	9.62659	-7.73242	0
2011-02-12	14.2884	9.51764	-9.11285	0				2011-02-12	12.9153	13.5644	-0.441345	0				2011-02-12	12.7337	15.0476	0.658936	0
2011-02-13	13.0584	8.98474	-1.9982	0.016606				2011-02-13	9.09209	8.93289	-2.98245	0.0659157				2011-02-13	12.2696	11.3387	-1.46561	0
2011-02-14	13.1153	8.0954	-4.67969	0.0711877				2011-02-14	8.9494	3.37137	-8.45969	0.0891972				2011-02-14	14.1742	11.2304	-0.407715	0
2011-02-15	14.6419	6.86209	-5.55618	0.0146255				2011-02-15	12.2892	4.27743	-6.80533	0.0117084				2011-02-15	13.1682	15.9131	1.85733	0.0253669
2011-02-16	8.9143	9.45538	-7.72607	0.816233				2011-02-16	7.77564	4.84119	-6.6987	0.0589011				2011-02-16	8.04882	11.3276	-0.930695	0.430689
2011-02-17	14.5487	-5.37805	-13.1095	0				2011-02-17	10.0425	-1.8519	-9.88379	0.0363416				2011-02-17	2.52028	3.57269	-4.86707	3.75006
2011-02-18	14.7343	-0.890289	-14.2893	0				2011-02-18	13.0713	2.13126	-9.53079	0				2011-02-18	5.97957	2.45023	-7.45136	1.04886
2011-02-19	14.5607	2.76895	-12.5927	0				2011-02-19	14.708	7.1882	-5.88376	0				2011-02-19	7.06376	1.77811	-7.98935	0.0772206
2011-02-20	14.8058	6.177	-5.61121	0				2011-02-20	15.7847	7.74582	-3.72162	0				2011-02-20	7.57043	3.12888	-8.5972	0.102472
2011-02-21	13.5515	10.5654	-2.4505	0				2011-02-21	14.5839	9.02798	-5.35623	0.249975				2011-02-21	12.8134	3.75101	-5.11057	0.103797
2011-02-22	12.5546	12.8219	-3.15533	0.0253318				2011-02-22	15.2246	0.296661	-9.01776	0.025322				2011-02-22	14.1337	4.40775	-6.15341	0.0206657
2011-02-23	11.2235	15.0713	-1.37833	0.048148				2011-02-23	14.4431	8.3381	-3.82596	0				2011-02-23	13.6007	3.6463	-6.31433	0.0198646
2011-02-24	9.13423	14.029	-0.176239	0.378813				2011-02-24	15.706	7.85391	-1.59991	0				2011-02-24	12.3913	3.65097	-5.56439	0.119625
2011-02-25	2.77957	1.22372	-5.6586	2.97751				2011-02-25	15.7305	9.76785	-0.857575	0				2011-02-25	7.77216	0.767487	-6.4913	2.97749
2011-02-26	10.1287	-0.393311	-7.11295	1.36432				2011-02-26	13.3	9.80423	-1.62787	0				2011-02-26	9.10391	1.27039	-8.62015	0.295811
2011-02-27	13.2969	0.585052	-7.70096	0.0281418				2011-02-27	10.3994	10.8723	0.913727	0.135535				2011-02-27	12.1507	3.51529	-6.65085	0.0650744
2011-02-28	17.2142	0.493256	-8.84811	0				2011-02-28	17.4254	13.2917	0.451325	0				2011-02-28	17.3117	1.36508	-7.94958	0
2011-03-01	14.6713	2.33279	-8.98145	0.0162335				2011-03-01	17.0411	11.6019	0.930908	0				2011-03-01	13.7245	4.88168	-5.49631	0.0476936
2011-03-02	18.4658	2.54117	-10.9462	0				2011-03-02	7.49101	6.88437	-1.60944	0.067759				2011-03-02	7.6401	4.19864	-5.03009	0.404357
2011-03-03	19.2908	4.45703	-11.2041	0				2011-03-03	16.8886	12.0278	-1.25281	0				2011-03-03	18.6625	10.9636	-2.74924	0
2011-03-04	19.9224	5.81515	-7.33868	0				2011-03-04	15.929	9.27362	-1.13031	0.00785053				2011-03-04	10.237	5.73178	-6.34576	0.0241689
2011-03-05	20.3348	4.54761	-8.29578	0				2011-03-05	17.3732	13.2264	-0.499725	0.0219845				2011-03-05	19.8269	5.74597	-6.64862	0
2011-03-06	19.3238	7.08084	-8.43719	0				2011-03-06	18.3239	12.2743	0.0575256	0				2011-03-06	18.7993	10.424	-2.1394	0
2011-03-07	17.5437	6.15775	-4.88046	0.0278863				2011-03-07	17.0099	6.58011	-2.64499	0.0355967				2011-03-07	17.6552	6.4108	-3.29724	0
2011-03-08	17.2736	2.02457	-11.5938	0.0133323				2011-03-08	10.2865	4.60867	-5.2869	0.037023				2011-03-08	20.5105	14.7244	-0.166534	0
2011-03-09	20.6489	0.333893	-13.1565	0				2011-03-09	15.8969	9.70392	-4.2941	0				2011-03-09	20.5278	20.1691	3.97144	0
2011-03-10	19.5806	2.28293	-8.20837	0				2011-03-10	19.027	9.67966	-1.94586	0				2011-03-10	7.78873	10.7824	1.93185	0.534451
2011-03-11	21.3942	1.02148	-10.0117	0				2011-03-11	14.1328	12.8333	-0.86496	0.724024				2011-03-11	18.7999	14.5516	1.48752	0.038457
2011-03-12	20.9267	5.94614	-11.9603	0				2011-03-12	17.92	10.5774	-0.687744	0.0680007				2011-03-12	9.31962	16.0289	5.75278	0.267658
2011-03-13	17.7086	9.49713	-0.866333	0.0218563				2011-03-13	19.6706	10.8318	-1.24857	0				2011-03-13	15.0536	19.8065	7.00302	0.160657
2011-03-14	17.3651	14.6114	0.965912	0				2011-03-14	13.1755	14.9572	2.46139	0				2011-03-14	9.59666	19.6429	7.40332	0.0677797
2011-03-15	17.7455	16.0871	3.37271	0				2011-03-15	19.5804	14.0935	3.09662	0				2011-03-15	11.4428	15.6558	2.37915	8.19103
2011-03-16	17.2263	14.273	0.552551	0.234258				2011-03-16	18.7844	15.561	2.819	0				2011-03-16	6.81362	6.229	-1.68756	0.231866
2011-03-17	10.0024	4.34326	-2.06943	0.562532				2011-03-17	19.0887	18.0388	5.78332	0				2011-03-17	17.793	6.98981	-2.51877	0.0479092
2011-03-18	18.2982	10.3548	-1.27542	0.0169585				2011-03-18	20.4217	14.682	2.75095	0				2011-03-18	18.0223	11.9103	-1.41119	1.46256
2011-03-19	20.8026	6.0863	-3.79105	0				2011-03-19	19.6801	18.2924	5.68741	0				2011-03-19	18.7517	16.1445	4.17392	0.0462943
2011-03-20	20.9591	10.3059	-2.10638	0				2011-03-20	16.3491	10.1031	1.96976	0				2011-03-20	19.4899	12.4169	1.87711	0
2011-03-21	20.9797	16.2862	0.305115	0				2011-03-21	21.1024	15.8979	3.0112	0				2011-03-21	21.0259	12.9776	2.16376	0.00964637
2011-03-22	19.3106	18.9043	3.20767	0.0324884				2011-03-22	21.3888	15.8341	4.16547	0				2011-03-22	20.404	11.9635	2.03412	0.0214653
2011-03-23	10.1471	12.9489	6.36847	1.22168				2011-03-23	20.8351	15.643	5.90488	0				2011-03-23	21.6249	12.869	2.83984	0.0238328
2011-03-24	13.1597	12.9	5.99277	0.047254				2011-03-24	21.297	18.4929	5.26273	0				2011-03-24	21.9166	14.2239	4.26486	0.0308176
2011-03-25	18.9589	17.3544	4.40936	0				2011-03-25	22.7673	26.1765	8.74008	0				2011-03-25	22.3898	16.8817	4.1329	0
2011-03-26	18.7119	16.2021	-1.91128	0.0136676				2011-03-26	21.4017	24.0975	8.98642	0.0492159				2011-03-26	21.577	18.0796	4.60757	0.0180917
2011-03-27	22.9234	7.73557	-2.819	0				2011-03-27	17.3607	15.331	2.89508	0.13923				2011-03-27	12.9626	10.7674	0.658508	0
2011-03-28	22.3791	13.1223	-1.00433	0				2011-03-28	21.4851	13.2277	0.718567	0				2011-03-28	23.2737	13.5578	1.08701	0
2011-03-29	20.8084	21.3449	2.97937	0.124093				2011-03-29	21.8568	19.987	3.95917	0				2011-03-29	22.727	17.6613	4.14529	0
2011-03-30	20.8566	16.8922	0.614471	0.10928				2011-03-30	15.3112	17.9464	6.66775	0				2011-03-30	20.5271	23.0245	8.77206	0.0180476
2011-03-31	19.1934	8.25421	-3.40253	0				2011-03-31	16.9784	22.2856	8.1008	0.0574902				2011-03-31	22.635	24.8568	13.6032	0
2011-04-01	17.3288	4.2168	-3.77243	0.0582047				2011-04-01	11.1629	15.0236	6.71646	1.46731				2011-04-01	23.2491	24.6239	12.639	0.0417732
2011-04-02	24.6733	8.75308	-0.473969	0				2011-04-02	19.4728	18.9365	6.54874	0				2011-04-02	9.48095	18.6076	3.35196	2.55009
2011-04-03	24.8117	14.9615	1.56226	0				2011-04-03	22.2042	23.1188	9.69595	0.110293				2011-04-03	15.0973	9.18588	-0.818756	0.233071
2011-04-04	23.4868	19.8707	3.36905	0				2011-04-04	13.5799	21.0671	8.93195	1.54831				2011-04-04	18.0486	10.6863	1.24115	0.174083
2011-04-05	24.4015	20.5691	6.53162	0				2011-04-05	8.6286	15.9977	6.29715	0				2011-04-05	8.10262	9.56815	1.46939	1.07886
2011-04-06	23.2167	23.9045	9.939	0.145773				2011-04-06	16.7611	15.2944	4.75558	0.0536568				2011-04-06	14.3015	8.65506	1.08414	0.242501
2011-04-07	22.6179	16.3865	1.83829	0.019879				2011-04-07	20.5976	18.6048	5.10834	0				2011-04-07	9.56936	7.94553	-0.473969	0.297467
2011-04-08	23.4639	11.4005	-0.776977	0				2011-04-08	24.4847	19.4878	6.17963	0				2011-04-08	22.0718	14.2407	3.76453	0
2011-04-09	24.2867	10.7975	0.0231018	0				2011-04-09	24.4073	20.7931	10.2335	0				2011-04-09	22.949	13.4871	4.19739	0.132003
2011-04-10	21.3366	14.5921	2.29688	0				2011-04-10	21.4653	20.2687	9.21844	0				2011-04-10	2.3689	6.87088	0.64209	7.06592
2011-04-11	22.8943	14.0492	3.71573	0				2011-04-11	23.4789	20.463	9.91922	0				2011-04-11	8.7876	1.00314	-4.64945	3.69508
2011-04-12	25.1669	19.3543	4.83499	0.0537607				2011-04-12	24.5734	27.904	12.0252	0				2011-04-12	13.3354	2.9891	-5.1344	0.963845
2011-04-13	25.7964	19.6827	7.01041	0				2011-04-13	24.3664	23.5059	11.5006	0				2011-04-13	19.4589	9.38818	0.112091	0.163586
2011-04-14	24.0117	27.4103	10.6424	0.0140914				2011-04-14	21.7221	22.6469	9.36056	0				2011-04-14	19.8596	12.8564	2.00265	0.062563
2011-04-15	25.8164	26.3535	14.4308	0				2011-04-15	18.9796	20.6986	10.8219	0				2011-04-15	18.8477	14.8297	3.28781	0.00113464
2011-04-16	23.727	28.1367	14.9575	0				2011-04-16	17.8382	20.8568	7.09421	0.1819				2011-04-16	25.8413	17.5657	5.77176	0
2011-04-17	24.1286	27.1458	14.4377	0.446149				2011-04-17	25.5737	24.8493	12.3721	0				2011-04-17	24.3281	16.1481	4.59677	0
2011-04-18	11.9301	16.5821	8.65347	1.00267				2011-04-18	24.6486	26.2486	13.9503	0.0396658				2011-04-18	21.0133	14.5448	4.37274	0
2011-04-19	18.7959	16.8825	9.08237	1.35886				2011-04-19	20.4307	21.87	12.7283	0.0785244				2011-04-19	24.9809	17.0485	7.12601	0.129482
2011-04-20	11.4168	15.5264	8.12125	1.92126				2011-04-20	21.3456	23.5668	10.4973	0				2011-04-20	25.7862	16.5913	5.73105	1.47433
2011-04-21	17.308	15.5046	7.14502	0.182078				2011-04-21	20.0034	27.7247	13.6204	0.103384				2011-04-21	25.263	17.3156	6.3717	0.129347
2011-04-22	19.931	18.1115	7.82752	0				2011-04-22	20.5658	27.3878	15.8926	0.223098				2011-04-22	25.7584	17.9345	6.28449	0
2011-04-23	19.4274	20.4342	8.56937	0.0644667				2011-04-23	23.5412	24.6414	12.6195	0.140852				2011-04-23	25.0352	20.5517	8.86685	0.0302678
2011-04-24	25.3175	23.8141	10.6935	0.00194038				2011-04-24	16.9033	24.689	13.7804	0.0667215				2011-04-24	21.6722	21.5279	11.0467	0.0201564
2011-04-25	19.4524	22.9937	14.1111	0.157379				2011-04-25	24.1418	25.8537	14.9906	0.0102879				2011-04-25	26.1627	24.9521	13.1643	0.0136964
2011-04-26	12.9829	20.0067	13.2661	0.359067				2011-04-26	24.3309	28.9106	15.8332	0				2011-04-26	23.9262	24.2059	14.2624	0.0155719
2011-04-27	25.1119	24.8699	13.792	0				2011-04-27	20.1669	24.997	6.49445	0.816102				2011-04-27	17.3793	21.7791	13.3048	0.105735
2011-04-28	12.4497	18.1836	11.2274	0.27103				2011-04-28	5.89872	10.4843	3.16409	4.43094				2011-04-28	13.3665	19.6614	12.8381	0.486608
2011-04-29	23.412	28.1611	12.8003	0				2011-04-29	22.633	18.7047	7.01938	0.177865				2011-04-29	20.0435	22.1868	11.1754	0.135245
2011-04-30	22.0181	30.1792	16.9389	0.166198				2011-04-30	11.9345	18.9398	9.97437	0.335939				2011-04-30	26.9613	22.7114	11.0151	0
2011-05-01	25.1197	21.1148	9.60113	0				2011-05-01	17.1585	21.1145	10.4384	0				2011-05-01	24.0892	20.6829	9.98727	0
2011-05-02	25.52	31.0312	11.5089	0.858006				2011-05-02	21.9282	25.533	11.1202	0.036701				2011-05-02	21.3234	20.9734	10.4176	0.122311
2011-05-03	24.4085	22.7129	11.3866	0.0250346				2011-05-03	26.5864	28.5724	14.2634	0.17189				2011-05-03	18.1528	19.7917	11.2495	0.355751
2011-05-04	26.8078	22.4369	12.3648	0				2011-05-04	8.9968	17.3688	9.22324	2.13858				2011-05-04	20.8311	20.365	6.71625	0.0111578
2011-05-05	24.1757	26.9124	13.9657	0				2011-05-05	27.0434	18.7632	9.90442	0				2011-05-05	26.5348	19.9934	9.59897	0.410024
2011-05-06	25.0912	28.6521	16.0644	0.0268294				2011-05-06	28.4191	25.1565	11.488	0				2011-05-06	25.7917	21.4864	11.1266	0.0674014
2011-05-07	26.354	29.7204	18.6973	0.119109				2011-05-07	28.5811	28.3578	14.4166	0				2011-05-07	27.4498	24.8078	13.7388	0
2011-05-08	24.8528	29.2175	19.7639	0.224892				2011-05-08	28.663	27.9383	16.7211	0.0245323				2011-05-08	27.492	26.3984	14.1945	0
2011-05-09	15.242	23.2412	3.64426	2.22182				2011-05-09	24.4638	29.3579	16.9403	0				2011-05-09	27.9933	28.7142	16.0467	0.0955808
2011-05-10	27.1009	16.8409	8.82791	0.0726597				2011-05-10	25.3559	27.0391	15.9659	0				2011-05-10	26.7518	28.263	16.8479	0.583852
2011-05-11	16.4689	14.9075	7.18127	0.041437				2011-05-11	23.2562	27.8651	16.8738	0.112025				2011-05-11	10.0111	18.3368	11.2536	4.86388
2011-05-12	25.4561	20.1946	9.0914	0				2011-05-12	24.0208	26.9377	16.3913	0.142614				2011-05-12	6.99086	12.1317	7.2254	6.18192
2011-05-13	22.6113	24.5656	11.2931	0.341663				2011-05-13	16.8178	23.3214	14.6215	1.46994				2011-05-13	24.0839	15.9732	7.77701	0.123819
2011-05-14	29.0854	22.4656	10.5972	0				2011-05-14	23.793	26.2589	13.435	0.0694113				2011-05-14	19.1006	19.3894	10.8654	0
2011-05-15	23.6575	27.4942	15.027	0.266636				2011-05-15	6.77762	17.8418	11.9653	3.67223				2011-05-15	23.9821	20.3321	10.9951	0.265491
2011-05-16	18.6281	25.2393	16.6768	0.0643469				2011-05-16	29.095	24.9727	13.9566	0				2011-05-16	27.9772	22.5159	10.6178	0.130747
2011-05-17	22.9106	28.2074	13.7729	8.28763				2011-05-17	27.2906	27.993	16.1328	0.0423581				2011-05-17	27.9049	24.2293	14.1019	0.0423286
2011-05-18	14.1532	19.7702	12.9636	0.197074				2011-05-18	23.6038	23.1717	13.5412	0.293675				2011-05-18	26.8526	26.1872	15.9878	0.406649
2011-05-19	26.569	24.4628	14.5832	0				2011-05-19	26.8649	20.2019	12.5413	0.196023				2011-05-19	27.089	29.0287	17.0508	2.0056
2011-05-20	26.8935	23.984	11.6968	0				2011-05-20	25.55	22.1271	12.911	0.168368				2011-05-20	23.8899	28.0798	18.4207	5.36958
2011-05-21	27.1696	21.0874	12.3833	0.528844				2011-05-21	24.8243	22.0817	11.0293	0				2011-05-21	25.951	29.0094	19.0521	0.0535021
2011-05-22	25.165	24.2387	15.124	0.0297806				2011-05-22	29.2096	25.2659	14.2337	0				2011-05-22	20.046	23.4896	16.3106	0.314819
2011-05-23	28.4436	27.2648	16.4526	0.066417				2011-05-23	19.0705	27.5948	16.568	0.552442				2011-05-23	22.5142	23.3913	15.9058	0
2011-05-24	21.1422	25.7515	14.3763	0.0369417				2011-05-24	18.4574	22.7614	12.1256	1.87103				2011-05-24	20.532	25.6627	14.0345	0
2011-05-25	27.2592	27.8097	15.5212	0.159576				2011-05-25	28.3516	20.5722	11.9865	0.171634				2011-05-25	28.8267	22.8251	10.958	0
2011-05-26	26.2568	28.2232	17.6041	0.133358				2011-05-26	29.2369	21.2754	12.5775	0.0340154				2011-05-26	29.1481	22.8196	10.0752	0
2011-05-27	28.77	31.0412	19.1541	0				2011-05-27	30.8435	27.0187	14.4799	0				2011-05-27	26.0028	20.6651	10.0036	0.0755668
2011-05-28	29.201	35.0797	21.595	0				2011-05-28	27.6138	29.9507	17.8744	0				2011-05-28	28.8103	22.782	13.625	0
2011-05-29	27.5217	34.8191	23.9792	0				2011-05-29	25.4321	23.1843	11.5141	0.128501				2011-05-29	27.5225	28.3958	18.3012	0
2011-05-30	22.0071	29.5927	15.5793	2.71271				2011-05-30	30.4437	20.7918	12.0795	0.160736				2011-05-30	20.9287	24.6308	12.5927	0.134079
2011-05-31	25.9798	27.0691	16.0435	0				2011-05-31	29.3853	24.3066	12.308	0				2011-05-31	28.0962	23.6865	14.8749	0.214158
2011-06-01	27.24	28.2342	17.1864	3.68205				2011-06-01	29.5684	30.657	17.1096	0				2011-06-01	24.2655	24.3686	14.7517	0.404059
2011-06-02	16.015	21.449	15.8324	2.14868				2011-06-02	30.3722	30.5167	19.9472	0				2011-06-02	28.7534	27.3654	15.7669	0.297816
2011-06-03	14.7621	18.2253	12.2794	1.65214				2011-06-03	30.8475	29.5006	19.5876	0				2011-06-03	28.5873	20.9047	11.3315	0
2011-06-04	20.6917	18.5395	12.7001	0.444813				2011-06-04	27.5921	26.8762	14.1132	0.290236				2011-06-04	30.4715	24.0395	12.558	0
2011-06-05	12.0311	14.1242	7.6785	5.25684				2011-06-05	28.8123	19.6869	11.9224	0				2011-06-05	27.746	26.6597	11.3601	0
2011-06-06	24.2903	22.083	11.3699	0.111033				2011-06-06	31.0749	21.9262	13.0609	0.113631				2011-06-06	27.3261	28.2689	16.8905	0
2011-06-07	29.0011	26.3673	16.0465	0				2011-06-07	30.0689	23.9103	15.0997	0				2011-06-07	28.5475	28.9019	17.0586	0
2011-06-08	19.7865	26.7947	17.5108	0.722791				2011-06-08	30.5269	27.5536	16.9509	0.199565				2011-06-08	30.7212	31.0185	18.6621	0
2011-06-09	16.8167	23.2982	16.9187	0.0638386				2011-06-09	25.7504	26.3566	17.2893	0.0821069				2011-06-09	27.8634	28.2256	17.1061	0.0941618
2011-06-10	19.7494	24.1613	16.219	3.97842				2011-06-10	30.978	27.6003	18.3463	0.113284				2011-06-10	21.7461	23.352	13.9299	0.111086
2011-06-11	21.7816	24.0667	16.472	0.406808				2011-06-11	30.0686	30.5782	18.6257	0				2011-06-11	27.421	26.0344	16.561	0.891428
2011-06-12	16.6712	23.544	15.3712	0.42974				2011-06-12	21.5049	30.2009	20.2791	0.0419499				2011-06-12	29.4811	27.3394	15.8585	0.0251847
2011-06-13	14.1069	20.7462	15.1119	0.184504				2011-06-13	23.5476	31.0544	20.6691	0.0382164				2011-06-13	29.7892	29.9148	18.8665	0
2011-06-14	26.7931	25.3238	16.1596	0				2011-06-14	28.524	28.7371	19.4628	0				2011-06-14	27.9576	29.9996	19.016	0
2011-06-15	24.0493	25.2377	16.7795	0.136366				2011-06-15	30.2449	32.2516	19.9594	0				2011-06-15	25.2513	31.2765	19.9395	0.455184
2011-06-16	28.2361	27.4838	17.6916	0.0381906				2011-06-16	22.4426	27.7751	19.8057	0				2011-06-16	8.90008	23.4188	17.19	0.860659
2011-06-17	29.9548	28.7758	17.5017	0.0695367				2011-06-17	31.1162	30.1892	19.8723	0				2011-06-17	21.8382	30.3328	17.0001	0.0377795
2011-06-18	30.9222	28.4929	16.3245	0				2011-06-18	30.4921	34.0199	20.9287	0.0555392				2011-06-18	28.0356	33.5063	20.3337	0
2011-06-19	23.5309	27.2192	17.2313	0				2011-06-19	28.2826	34.2344	22.331	0.0898084				2011-06-19	17.1087	29.9309	19.7889	0.179198
2011-06-20	27.3774	30.2837	19.2702	0				2011-06-20	22.3695	35.5117	22.7977	0.253426				2011-06-20	26.9693	31.2562	20.4028	0
[truncated: 32,701 more rows]

## Sheet: RCP 4.5
Zhongwei
MIROC5								IPSL-CM5A-MR								GFDL-ESM2G
Date	solar radiation (MJ/m2)	Tmax (°C)	Tmin (°C)	precipitation (mm)				Date	solar radiation (MJ/m2)	Tmax (°C)	Tmin (°C)	precipitation (mm)				Date	solar radiation (MJ/m2)	Tmax (°C)	Tmin (°C)	precipitation (mm)
2006-01-01	9.55257	-1.16983	-12.5248	0				2006-01-01	9.38092	4.26001	-5.96478	2.67754				2006-01-01	9.49078	-3.09274	-14.7377	0
2006-01-02	9.00614	-0.413361	-11.1015	0				2006-01-02	3.52646	2.68192	-6.68195	0				2006-01-02	9.89502	1.72736	-10.2122	0
2006-01-03	9.43448	0.979065	-9.8284	0				2006-01-03	7.68064	5.82754	-9.92441	0.150011				2006-01-03	10.2796	0.658417	-13.7412	0
2006-01-04	9.66727	0.143158	-10.99	0				2006-01-04	6.2098	-8.78552	-16.8021	0.257099				2006-01-04	10.1912	-8.16775	-16.4787	0
2006-01-05	9.68747	-0.669922	-11.7655	0				2006-01-05	10.1577	-10.6919	-20.0238	0.0151894				2006-01-05	10.3332	-3.28024	-14.8404	0
2006-01-06	10.0378	-0.0103149	-11.487	0				2006-01-06	10.2042	-6.0567	-18.507	0				2006-01-06	7.19349	0.682342	-11.8625	0
2006-01-07	10.2342	2.35074	-11.0534	0				2006-01-07	10.2621	-2.8866	-13.0374	0				2006-01-07	10.2041	3.03842	-9.80667	0
2006-01-08	10.3005	4.12237	-8.22464	0				2006-01-08	10.7335	-0.573334	-11.5708	0				2006-01-08	9.22917	2.32324	-8.35696	0.00683838
2006-01-09	9.86389	4.15793	-9.39243	0				2006-01-09	9.64551	-0.0956421	-11.7752	0				2006-01-09	6.12794	0.847351	-9.57126	0
2006-01-10	9.96051	4.78131	-9.18863	0				2006-01-10	10.182	3.45911	-9.03604	0				2006-01-10	6.69221	-1.10419	-10.4173	0.0161521
2006-01-11	4.97384	-0.620667	-8.00943	0.00459823				2006-01-11	10.128	5.89496	-7.17346	0				2006-01-11	9.92724	1.49472	-9.85239	0
2006-01-12	7.19713	0.512573	-8.5159	0.00948118				2006-01-12	10.2742	3.34933	-6.80551	0				2006-01-12	10.6007	2.73941	-9.36389	0
2006-01-13	10.4078	5.54813	-7.90292	0				2006-01-13	8.95717	-0.190308	-9.5961	0.457548				2006-01-13	7.42907	-0.01474	-9.05911	1.37264
2006-01-14	7.25738	1.91849	-10.0311	0.0928704				2006-01-14	7.894	-3.30335	-12.5724	0.0623494				2006-01-14	6.18753	-2.99493	-11.7196	0.0411315
2006-01-15	10.5151	-4.23123	-12.4359	0				2006-01-15	10.561	0.205048	-12.1214	0				2006-01-15	6.66945	-2.24204	-11.9824	0
2006-01-16	9.77727	-4.17419	-13.0796	0				2006-01-16	7.67574	-5.0806	-14.0521	0.0218086				2006-01-16	11.0573	0.614044	-12.5969	0
2006-01-17	10.5059	1.48395	-10.5241	0				2006-01-17	10.8765	-0.774902	-13.6882	0				2006-01-17	11.5495	3.02954	-10.1591	0
2006-01-18	9.49919	3.33731	-7.56869	0				2006-01-18	10.3518	4.17368	-12.3313	0				2006-01-18	7.22151	0.124786	-9.53107	0.000184635
2006-01-19	11.3548	4.11993	-7.58548	0				2006-01-19	11.0013	-4.48184	-14.0899	0.0408326				2006-01-19	8.13199	-2.18494	-12.7493	0.0176516
2006-01-20	5.61477	1.73764	-5.01135	0				2006-01-20	9.9099	-7.35754	-18.6355	0.118406				2006-01-20	9.4708	0.653748	-11.1401	0
2006-01-21	10.3078	3.66254	-9.52545	0.126997				2006-01-21	9.62782	-6.57953	-20.1653	0				2006-01-21	5.98552	-1.40158	-13.3075	0
2006-01-22	11.6217	-8.43271	-17.4406	0				2006-01-22	10.3112	-0.757019	-15.154	0				2006-01-22	11.7667	-0.286499	-13.1587	0
2006-01-23	9.87587	-3.66797	-18.1643	0				2006-01-23	9.99247	0.963348	-11.3029	0				2006-01-23	10.1534	1.09537	-10.2116	0
2006-01-24	10.6352	-0.760559	-14.8456	0				2006-01-24	8.13794	1.25397	-11.0828	0				2006-01-24	12.1583	1.31979	-9.3103	0
2006-01-25	4.19132	1.51529	-9.76526	0.00213325				2006-01-25	6.61776	2.01794	-15.77	0.0597251				2006-01-25	11.934	5.74628	-5.74597	0
2006-01-26	10.7652	4.13123	-11.1166	0.0587355				2006-01-26	11.837	-8.80124	-20.5999	0				2006-01-26	11.042	7.78107	-2.42481	0
2006-01-27	11.765	-8.03491	-14.0961	0				2006-01-27	11.3803	-7.45261	-20.164	0				2006-01-27	11.1817	9.89945	-3.0712	0
2006-01-28	12.6751	-2.9791	-15.1326	0				2006-01-28	7.60949	0.0501099	-12.5546	0				2006-01-28	11.04	7.91428	-4.32071	0.00504471
2006-01-29	11.3668	1.32492	-11.2728	0.00873405				2006-01-29	10.1613	-8.69888	-17.9398	0				2006-01-29	7.05382	5.22711	-5.56418	0.136414
2006-01-30	8.50775	-8.45584	-17.9342	0.156681				2006-01-30	12.5436	-4.33804	-17.2947	0				2006-01-30	6.89668	0.0343323	-9.12955	0.228796
2006-01-31	11.9233	-7.01047	-19.6357	0				2006-01-31	12.2765	3.02545	-11.2021	0				2006-01-31	8.06481	0.595673	-9.49161	0.0143359
2006-02-01	12.5299	-1.84644	-16.1878	0				2006-02-01	7.74129	-0.111511	-10.8193	0				2006-02-01	8.80284	-0.452576	-10.3132	0.0164179
2006-02-02	13.3043	2.79782	-15.9353	0				2006-02-02	11.9201	0.6828	-10.0692	0				2006-02-02	8.8377	1.04333	-10.0666	0.00465268
2006-02-03	12.8148	5.72217	-11.5359	0				2006-02-03	4.61817	-2.02017	-12.1552	0.0118438				2006-02-03	11.8232	3.09524	-8.2644	0
2006-02-04	13.2481	8.62396	-5.85806	0				2006-02-04	13.2112	-3.86646	-14.8341	0				2006-02-04	11.4432	3.78778	-7.60928	0
2006-02-05	11.6271	9.37836	-1.62204	0.539482				2006-02-05	13.8597	1.1532	-13.0573	0				2006-02-05	13.6103	10.0109	-3.24777	0
2006-02-06	12.3506	-0.30426	-6.17218	1.89061				2006-02-06	13.5565	3.58484	-9.7301	0				2006-02-06	12.3824	-0.987518	-10.41	0
2006-02-07	13.0741	2.47571	-7.65549	0.0165383				2006-02-07	12.4637	3.30356	-8.43787	0				2006-02-07	13.0213	0.461517	-12.2606	0
2006-02-08	0.599227	-1.15469	-8.75491	0.0375005				2006-02-08	11.6178	3.49872	-6.66205	0.0144315				2006-02-08	12.712	3.46634	-7.4577	0.0142403
2006-02-09	14.043	1.65076	-10.4246	0				2006-02-09	11.8563	6.18954	-5.21594	0				2006-02-09	12.3868	-1.39868	-10.1855	0.00924664
2006-02-10	14.4858	5.6203	-10.5748	0				2006-02-10	11.3929	5.20242	-5.33313	0.0164208				2006-02-10	14.1849	2.89984	-9.12491	0
2006-02-11	13.4784	7.19461	-6.69672	0				2006-02-11	11.7638	8.66892	-4.14343	0.0297398				2006-02-11	14.0247	7.19308	-7.08106	0
2006-02-12	14.2198	-0.124969	-9.81607	0				2006-02-12	12.8574	6.97424	-6.16657	0.0271237				2006-02-12	14.6216	7.68109	-3.31979	0
2006-02-13	14.6099	7.27426	-9.17938	0				2006-02-13	10.0694	6.55228	-6.7948	0				2006-02-13	14.5981	8.91269	-3.22705	0
2006-02-14	13.6824	10.4576	-5.62241	0				2006-02-14	11.9145	9.06833	-3.48209	0				2006-02-14	14.25	8.27048	-3.89078	0
2006-02-15	12.6521	8.29596	-2.37192	0.0199855				2006-02-15	14.3907	11.287	-2.17306	0				2006-02-15	14.5541	4.55441	-5.97995	0
2006-02-16	10.1269	8.22611	-2.08954	0.0647388				2006-02-16	13.4623	7.79025	-0.785187	0.259662				2006-02-16	12.4923	4.65802	-4.94498	0
2006-02-17	12.2832	15.2267	-4.19589	0.00839173				2006-02-17	9.92459	3.73917	-7.99329	0.167086				2006-02-17	12.265	-0.194458	-11.5745	0.0293689
2006-02-18	11.627	4.89331	-5.43689	0.102981				2006-02-18	14.3542	-1.89313	-12.2059	0				2006-02-18	16.0236	-0.564819	-12.4141	0
2006-02-19	10.0296	1.05637	-4.62558	0.0785677				2006-02-19	13.6142	4.88077	-9.66687	0.0171406				2006-02-19	15.4133	4.40512	-9.18576	0
2006-02-20	15.2766	10.517	-3.35831	0				2006-02-20	14.0636	7.49066	-4.29459	0				2006-02-20	16.4411	7.8172	-2.09463	0
2006-02-21	11.0132	10.25	-1.88409	0				2006-02-21	13.8375	10.1494	-3.39267	0.0260468				2006-02-21	6.11062	4.15054	-4.48514	0.338272
2006-02-22	14.9616	12.8366	-1.87799	0				2006-02-22	14.9621	11.292	-0.461029	0				2006-02-22	10.3411	1.08456	-7.64206	0.0853092
2006-02-23	15.136	10.3955	-2.62396	0				2006-02-23	13.8192	11.763	-0.970306	0.101102				2006-02-23	12.5349	3.42987	-6.9744	0.0608296
2006-02-24	15.8085	10.5387	-1.49924	0				2006-02-24	14.8027	4.4949	-4.05942	3.47714				2006-02-24	16.9771	7.36899	-3.9834	0
2006-02-25	11.4708	10.5716	-1.51404	0.813477				2006-02-25	15.7862	7.28137	-3.79526	0.0499771				2006-02-25	16.127	14.7262	-0.206696	0
2006-02-26	7.48639	3.72235	-1.57297	0.288781				2006-02-26	15.6665	5.50955	-4.70126	0.0317829				2006-02-26	10.6961	9.55453	-0.842316	0.106244
2006-02-27	16.1857	13.0119	-0.979309	0				2006-02-27	9.05203	6.41956	-4.79196	0.135649				2006-02-27	7.70128	3.73196	-4.39862	0.344923
2006-02-28	15.7635	9.32657	-1.48178	0.0109108				2006-02-28	17.3876	5.91318	-4.33035	0.0049816				2006-02-28	8.74883	4.63681	-5.39056	0.44973
2006-03-01	8.15867	7.18741	-1.53174	0.0514448				2006-03-01	13.4139	8.31848	-2.95017	0				2006-03-01	8.89184	2.69534	-6.83633	0.417751
2006-03-02	17.0402	9.7558	-0.225678	0				2006-03-02	15.633	7.86688	-2.92383	0				2006-03-02	9.10385	-0.137634	-10.7965	0.505829
2006-03-03	10.6719	6.93375	-2.60742	3.16573				2006-03-03	17.2141	14.1786	-2.67658	0				2006-03-03	12.1066	-1.09711	-13.0065	0.00859359
2006-03-04	11.4935	3.55353	-3.36844	0.0261738				2006-03-04	14.39	15.2792	-1.41928	0.614766				2006-03-04	17.3691	1.53415	-8.11215	0.0133726
2006-03-05	19.9591	8.70938	-3.35269	0				2006-03-05	10.8262	1.121	-8.93426	0.552524				2006-03-05	19.0862	4.29941	-7.56741	0.0233807
2006-03-06	16.3023	14.8568	-1.29068	0.0456222				2006-03-06	19.1024	1.17355	-10.98	0				2006-03-06	19.4551	5.10208	-9.43842	0
2006-03-07	6.71413	-0.773956	-8.66058	0.168407				2006-03-07	18.8264	5.97357	-6.81992	0				2006-03-07	19.6236	3.99829	-6.72479	0.0268731
2006-03-08	21.5702	-5.6145	-18.7038	0				2006-03-08	14.7926	6.78293	-4.02582	0.146277				2006-03-08	19.7759	7.58414	-2.87134	0.0115533
2006-03-09	21.6822	-1.46298	-20.3993	0				2006-03-09	11.663	2.28445	-6.53494	0.0841486				2006-03-09	20.3331	14.8456	-0.37262	0
2006-03-10	20.0644	6.56601	-9.69116	0				2006-03-10	18.0132	4.72449	-6.64734	0				2006-03-10	13.7823	14.4922	2.76025	0.133514
2006-03-11	19.3921	7.81671	-2.98297	0				2006-03-11	19.2273	3.0004	-10.468	0				2006-03-11	9.26125	16.0255	4.20859	1.37316
2006-03-12	9.34812	7.74417	-1.74442	0.0470291				2006-03-12	19.2756	6.36298	-6.01956	0.0581846				2006-03-12	9.56418	10.051	1.57584	0.247401
2006-03-13	16.115	8.66873	-0.972351	0.0611538				2006-03-13	19.4847	9.41443	-5.34653	0				2006-03-13	18.9072	12.257	0.42627	0.00611814
2006-03-14	13.1187	4.95789	-2.0451	0.0266855				2006-03-14	18.5187	5.55939	-4.63943	0.0240915				2006-03-14	17.1377	13.1053	1.53378	0.0915008
2006-03-15	20.2939	9.1803	-0.243957	0				2006-03-15	17.9666	8.52506	-2.90805	0.0300434				2006-03-15	7.544	10.4692	2.81244	0.547699
2006-03-16	19.3992	7.89218	0.122864	0.0143158				2006-03-16	12.6347	7.36847	-2.21658	0.275334				2006-03-16	6.96765	9.2901	-0.142303	0.390053
2006-03-17	20.2847	11.3529	0.275971	0				2006-03-17	7.59172	3.82843	-4.06366	0.410175				2006-03-17	13.3791	8.82315	-0.663422	0.131706
2006-03-18	18.5176	17.09	0.811523	0.0590604				2006-03-18	12.184	2.88995	-5.67642	0.266502				2006-03-18	16.7365	8.58441	-2.74817	0.0803982
2006-03-19	17.5963	19.7883	6.05939	0.0328989				2006-03-19	19.4883	10.1153	-1.85751	0				2006-03-19	19.7941	15.6604	4.23062	0.182639
2006-03-20	14.3453	17.4224	4.41779	0.134522				2006-03-20	17.8242	14.6558	2.08121	0.0358429				2006-03-20	20.133	17.7536	4.98743	0
2006-03-21	15.0689	17.029	3.33173	0.0153226				2006-03-21	17.9847	14.6737	1.98532	0.142121				2006-03-21	13.7636	13.6557	4.16141	0.0326778
2006-03-22	17.6311	22.8842	10.6481	0.0208078				2006-03-22	10.087	4.05106	-4.99527	0.496767				2006-03-22	18.7849	23.5535	10.3741	0.011732
2006-03-23	17.1078	17.3131	9.23218	0.0262814				2006-03-23	19.1356	6.68054	-3.85043	0.0334051				2006-03-23	12.499	14.0727	1.56854	0.515304
2006-03-24	16.1888	18.9573	10.6717	0				2006-03-24	21.0408	9.30475	-2.34317	0				2006-03-24	14.5067	8.24274	-0.417053	0.0161457
2006-03-25	21.5399	18.307	3.34692	0.0171605				2006-03-25	21.3202	13.3527	-0.878845	0				2006-03-25	11.9552	6.62418	-3.21817	0.227961
2006-03-26	18.3762	11.3563	1.03284	0.0230552				2006-03-26	19.5679	16.1004	1.4317	0.0350454				2006-03-26	14.153	7.53281	-2.97226	5.96245
2006-03-27	17.6878	18.4207	5.77487	0.0776266				2006-03-27	13.4121	13.0302	1.05081	0.144155				2006-03-27	10.623	5.57779	-3.22732	0.369975
2006-03-28	17.9452	12.0732	4.47266	0				2006-03-28	15	16.1574	2.54858	0.0143381				2006-03-28	14.0923	5.91986	-3.27847	0.234501
2006-03-29	12.5224	18.5263	5.2883	0.113125				2006-03-29	15.8202	16.878	5.52231	0.382903				2006-03-29	17.536	7.43011	-3.63977	0.104237
2006-03-30	15.3726	18.1566	5.43543	3.43018				2006-03-30	9.60952	13.754	5.25024	1.91026				2006-03-30	22.3334	9.26505	-1.05759	0
2006-03-31	3.43778	6.82538	0.674347	1.60651				2006-03-31	0.792443	5.91669	-0.82135	5.63098				2006-03-31	22.0373	12.9857	2.63812	0.0454686
2006-04-01	16.5065	9.88162	-0.0323792	0.0450353				2006-04-01	14.7513	4.94354	-2.8371	0.850369				2006-04-01	19.5615	13.3293	-0.439026	0
2006-04-02	23.2965	14.4421	2.25894	0				2006-04-02	18.2006	7.21768	-2.0433	0.0431798				2006-04-02	23.4948	8.69772	-1.77139	0
2006-04-03	22.2927	21.7507	4.77658	0				2006-04-03	22.6949	12.5026	1.72458	0.0133353				2006-04-03	23.0271	12.9355	0.357117	0.245895
2006-04-04	12.1461	18.4608	10.188	0.301697				2006-04-04	23.7048	16.5695	4.77542	0				2006-04-04	11.8367	9.4726	1.30685	0.964491
2006-04-05	13.1625	17.4382	9.2756	0.267383				2006-04-05	24.2399	18.4116	6.48276	0				2006-04-05	20.3845	8.56683	0.796356	0
2006-04-06	20.1386	17.0798	7.58389	0				2006-04-06	22.4165	17.1936	6.04108	0.0282076				2006-04-06	22.5045	12.2891	2.86676	0
2006-04-07	11.7405	11.0864	1.27234	0.144824				2006-04-07	21.5514	16.9465	0.922943	0				2006-04-07	24.1137	15.9691	4.36081	0
2006-04-08	20.4284	10.3519	1.06952	0.0160235				2006-04-08	24.839	20.8572	3.85849	0				2006-04-08	24.5397	19.6939	7.60135	0
2006-04-09	21.0724	16.3009	3.70544	0.096718				2006-04-09	23.5586	24.9018	6.63776	0.0115809				2006-04-09	24.8223	22.3859	10.8082	0
2006-04-10	18.9981	16.3802	4.47781	0.712219				2006-04-10	16.5323	20.4235	8.86926	0				2006-04-10	20.1521	19.184	6.20105	0.0637019
2006-04-11	16.3162	4.20868	-2.92725	0.0537728				2006-04-11	9.86379	13.2995	5.1716	1.64535				2006-04-11	23.2035	15.6844	5.68393	0
2006-04-12	26.4677	7.34064	-2.55902	0				2006-04-12	14.099	7.54971	-1.26996	0.896038				2006-04-12	25.4692	20.2177	6.24878	0
2006-04-13	25.884	18.9121	2.0943	0				2006-04-13	21.9626	6.07285	-1.95154	0.0339657				2006-04-13	25.5209	23.7987	8.66711	0
2006-04-14	24.6523	18.11	5.89111	0				2006-04-14	24.6516	8.75357	-4.08179	0				2006-04-14	23.676	22.5009	9.31189	0.0158763
2006-04-15	20.0294	22.671	9.99185	0.467008				2006-04-15	27.1317	12.2787	-3.80722	0				2006-04-15	10.1744	14.2348	5.22253	4.77751
2006-04-16	20.5188	19.4601	10.7747	1.43715				2006-04-16	25.4737	18.9338	4.561	0				2006-04-16	22.9365	15.7136	4.40597	0.104116
2006-04-17	17.5129	17.9839	7.8385	0.1318				2006-04-17	24.2485	21.3799	6.67294	0				2006-04-17	25.3888	19.0044	8.24573	0
2006-04-18	14.2184	14.0973	6.81467	0.328846				2006-04-18	24.2172	20.167	5.87036	0.0631753				2006-04-18	25.5867	21.7408	9.05246	0
2006-04-19	26.0394	20.0983	7.18344	0				2006-04-19	22.8791	22.9085	8.97824	0.0478177				2006-04-19	25.2299	20.7289	9.90912	0
2006-04-20	22.8046	23.2717	11.4051	3.02494				2006-04-20	19.6985	22.7635	8.81152	0				2006-04-20	22.1726	20.1303	8.30469	0
2006-04-21	17.7209	18.4007	10.0824	0.285201				2006-04-21	19.1139	19.636	7.12976	0.442703				2006-04-21	20.1791	17.2994	3.1088	0.0301147
2006-04-22	25.5649	18.0802	9.74307	0				2006-04-22	23.4958	18.5341	7.12192	0.0667535				2006-04-22	25.9051	14.9959	4.39163	0
2006-04-23	24.5551	22.5407	10.2508	0.152275				2006-04-23	25.5941	18.1988	4.04175	0				2006-04-23	24.7673	13.2316	2.9407	0.0779406
2006-04-24	20.4624	17.5044	5.50525	1.14415				2006-04-24	23.9873	17.5498	6.39041	0				2006-04-24	26.7274	15.8533	5.12595	0
2006-04-25	9.57222	8.96924	4.70096	0.627708				2006-04-25	26.6025	24.7142	9.28207	0				2006-04-25	25.2797	17.8694	7.59097	0.0692488
2006-04-26	6.13686	11.1014	4.01697	0.295665				2006-04-26	13.7491	18.172	10.1963	0.0803559				2006-04-26	19.5875	18.7483	9.02573	0.061622
2006-04-27	20.681	15.3879	7.12845	0				2006-04-27	22.6298	21.9679	9.57629	25.245				2006-04-27	23.5934	21.2791	11.2387	0
2006-04-28	21.6167	15.136	8.06418	0				2006-04-28	26.4706	26.9337	11.0386	0				2006-04-28	27.0892	26.8643	14.0226	0
2006-04-29	25.8621	25.1934	10.3248	0				2006-04-29	15.6577	17.2668	9.07471	0.202813				2006-04-29	27.1155	24.9799	8.61624	0
2006-04-30	25.0948	28.4108	13.7677	0				2006-04-30	23.0498	22.2064	8.18253	0				2006-04-30	27.7841	18.8974	8.56189	0.0641844
2006-05-01	22.1414	27.066	14.7778	0.153928				2006-05-01	27.5408	12.2554	0.787994	0				2006-05-01	28.0807	19.5802	9.28958	0
2006-05-02	18.1519	24.2181	14.8871	0.0210214				2006-05-02	28.2461	12.0035	-0.29071	0				2006-05-02	27.1333	25.5825	13.4121	0
2006-05-03	25.3329	24.8408	16.9755	0.449564				2006-05-03	27.6473	16.8785	3.22537	0				2006-05-03	27.3282	29.4154	17.5448	0
2006-05-04	7.46706	17.923	9.0451	5.99872				2006-05-04	21.2749	21.0166	8.32916	0				2006-05-04	27.4096	29.8161	17.7965	0.0618121
2006-05-05	10.7176	13.5489	8.38058	6.15495				2006-05-05	24.2524	22.6927	8.58926	0				2006-05-05	27.1971	28.2383	16.8305	0.127107
2006-05-06	25.3184	24.4604	9.87277	0.086471				2006-05-06	26.4603	26.2155	12.0986	0				2006-05-06	25.9644	30.5464	17.2091	0.051608
2006-05-07	14.231	16.1383	12.462	9.3457				2006-05-07	27.4235	28.7134	15.2567	0.0917686				2006-05-07	26.8733	28.201	15.4749	0.0511338
2006-05-08	27.77	20.5805	11.0383	0				2006-05-08	11.2004	20.3737	13.4808	0.492199				2006-05-08	26.052	25.9156	17.1764	0.0419483
2006-05-09	27.7516	24.0001	12.0759	0				2006-05-09	27.9697	25.0651	15.5242	0				2006-05-09	24.5358	25.0025	12.5583	0
2006-05-10	25.147	25.8731	15.2481	0.0619786				2006-05-10	25.6068	27.3195	17.1793	0				2006-05-10	27.5652	27.4654	16.5675	0
2006-05-11	24.0643	28.5069	16.1278	0.80554				2006-05-11	17.843	24.9852	11.697	1.13299				2006-05-11	27.1636	31.9483	19.4984	0
2006-05-12	23.0882	24.0533	14.6359	0				2006-05-12	22.2617	20.0566	8.71606	0.770247				2006-05-12	10.8622	15.2997	10.0178	0.677447
2006-05-13	25.8499	24.7929	14.4503	0.400755				2006-05-13	26.4818	21.5124	12.4447	0.261607				2006-05-13	16.9301	13.8171	6.31821	0.18065
2006-05-14	24.7315	27.7898	14.7657	3.33781				2006-05-14	19.9768	17.4074	9.2699	0.237728				2006-05-14	27.7298	20.4258	8.34979	0
2006-05-15	15.3055	17.3123	10.0727	0.242952				2006-05-15	26.6823	17.6739	9.72833	0.143449				2006-05-15	27.1286	23.1954	13.014	0
2006-05-16	26.4273	19.2948	8.42651	0				2006-05-16	22.327	16.6841	6.89584	0.0945552				2006-05-16	28.7108	23.5699	12.863	0
2006-05-17	26.6251	22.4963	10.0181	0				2006-05-17	28.6232	17.8501	8.49878	0				2006-05-17	27.9374	28.8437	16.875	0.207718
2006-05-18	23.5766	21.473	12.1526	0.169515				2006-05-18	29.7136	20.947	11.4684	0				2006-05-18	22.0967	26.2774	13.3503	0.0924656
2006-05-19	22.3416	19.4772	11.9869	0.2641				2006-05-19	22.8941	21.1172	12.0236	0.0694707				2006-05-19	29.1327	20.2516	8.3558	0
2006-05-20	20.9071	16.924	10.5114	0.0123352				2006-05-20	29.5434	21.6835	13.2014	0				2006-05-20	29.107	21.3999	11.2939	0
2006-05-21	24.6083	19.2403	10.5349	0.296804				2006-05-21	29.1612	23.6118	13.4229	0.146541				2006-05-21	21.8879	22.5804	9.22473	0.034609
2006-05-22	24.5294	19.5661	11.0414	0.0169761				2006-05-22	29.3818	21.6445	13.4635	0.094561				2006-05-22	29.4329	21.5006	9.07391	0
2006-05-23	27.2892	19.0315	12.3031	0				2006-05-23	26.435	21.8742	13.3825	0.0881198				2006-05-23	29.1855	20.8079	10.6816	0
2006-05-24	29.2857	24.4862	13.6153	0				2006-05-24	27.5465	23.0548	13.909	0				2006-05-24	29.2717	23.7993	14.8454	0
2006-05-25	15.0405	21.6988	14.2197	0.0769825				2006-05-25	18.931	22.9989	14.916	0.187472				2006-05-25	28.1675	27.5468	12.8278	0.0848108
2006-05-26	24.8106	25.7339	15.4928	0				2006-05-26	28.8581	27.2325	16.2867	0.0714848				2006-05-26	29.4225	22.9831	11.6141	0
2006-05-27	23.3345	26.2964	15.3068	0.0645459				2006-05-27	28.129	27.2691	15.6579	0				2006-05-27	28.8131	24.3468	13.7959	0
2006-05-28	25.1292	28.8171	16.7375	0				2006-05-28	27.9148	27.8344	16.2274	0				2006-05-28	29.0535	26.699	15.7633	0
2006-05-29	26.0829	30.6882	18.7517	0.602956				2006-05-29	27.952	28.3838	18.5083	0.135119				2006-05-29	29.2331	28.1551	17.8554	0
2006-05-30	12.6313	18.2289	9.52826	1.65217				2006-05-30	29.2808	32.0413	19.881	0.250395				2006-05-30	29.6793	31.8747	20.3468	0
2006-05-31	19.7304	21.3648	10.6767	0.352557				2006-05-31	26.4357	32.2893	21.8463	0				2006-05-31	17.6565	27.9516	19.3086	0.138774
2006-06-01	30.6502	26.8458	13.3414	0				2006-06-01	28.2658	29.5173	19.5011	0.117092				2006-06-01	21.6174	26.2592	17.9953	0.638976
2006-06-02	30.5638	25.945	12.4466	0				2006-06-02	30.2027	31.6958	18.8295	0.0223782				2006-06-02	18.4237	22.6876	15.6776	2.19773
2006-06-03	32.1776	23.2119	12.5173	0				2006-06-03	25.0135	33.7454	21.3281	0.0376548				2006-06-03	8.32602	21.3264	14.4185	0.768286
2006-06-04	30.7553	27.9082	14.8583	0.128646				2006-06-04	14.0208	30.1442	20.4197	0.361343				2006-06-04	18.1744	24.9232	16.7285	0.46823
2006-06-05	25.8492	25.1475	15.4822	0.483508				2006-06-05	23.1996	35.71	20.8394	0.372983				2006-06-05	11.9967	26.399	18.0021	2.06541
2006-06-06	22.9174	22.7136	16.0087	0.0934958				2006-06-06	18.04	27.6841	17.8066	0.193104				2006-06-06	14.7276	22.7273	14.9486	0.840886
2006-06-07	28.9052	25.9234	16.0377	0.00427649				2006-06-07	29.8795	25.041	16.1591	0				2006-06-07	22.9058	26.2331	18.8594	0.187808
2006-06-08	28.3229	27.3277	17.6775	0.0874972				2006-06-08	31.6617	26.902	16.8863	0				2006-06-08	29.5388	31.0613	20.5443	0.142945
2006-06-09	24.1369	27.7148	19.8803	0.325289				2006-06-09	30.1315	26.5058	14.5584	0				2006-06-09	28.8397	28.3116	12.394	0
2006-06-10	21.9126	27.1119	17.0266	0.58262				2006-06-10	30.3611	26.8528	16.0043	0				2006-06-10	31.0691	22.5832	9.35367	0
2006-06-11	26.8662	28.2477	18.6154	0				2006-06-11	16.2461	25.2353	15.1262	0.602661				2006-06-11	29.9228	24.7688	15.1099	0.0568178
2006-06-12	14.5578	26.6708	18.1429	0.00274056				2006-06-12	11.422	20.1314	12.7544	6.42872				2006-06-12	28.0537	29.88	17.1313	0.0696032
2006-06-13	25.0966	28.8352	19.3055	0.28873				2006-06-13	10.0177	18.7963	12.8307	2.16019				2006-06-13	30.1152	21.6924	10.7087	0
2006-06-14	26.8225	29.6205	20.9453	0.0738625				2006-06-14	18.4037	20.3417	13.7644	1.02367				2006-06-14	27.3744	22.7111	13.8808	0
2006-06-15	25.5162	30.2857	19.6636	0				2006-06-15	22.1276	22.0794	13.0933	0				2006-06-15	26.458	25.464	17.1515	0.116158
2006-06-16	21.3606	26.04	20.0252	0				2006-06-16	18.8306	18.5947	12.4371	1.26622				2006-06-16	28.7314	30.966	17.514	0
2006-06-17	21.2563	26.6521	20.331	0.257057				2006-06-17	28.1661	24.0736	13.4939	1.17653				2006-06-17	28.3123	31.391	20.3482	0
2006-06-18	14.8117	22.9159	19.3615	4.2407				2006-06-18	25.1614	25.4376	16.016	0.527378				2006-06-18	28.9768	35.6218	22.3659	0
2006-06-19	28.4392	27.8285	18.3201	0				2006-06-19	25.7251	27.0471	14.6062	0.275714				2006-06-19	20.9807	33.3591	20.4864	0.186379
2006-06-20	22.6954	29.8814	19.7597	10.1316				2006-06-20	29.1261	30.39	13.7932	0.173626				2006-06-20	9.31469	21.507	15.2935	0.689665
2006-06-21	10.328	22.0504	14.8642	1.81742				2006-06-21	29.5997	28.4448	17.0698	0.337089				2006-06-21	24.9178	28.2767	18.9726	0
2006-06-22	12.6434	21.5792	16.0125	0.774383				2006-06-22	30.0757	30.7017	17.0342	0				2006-06-22	27.8743	31.7549	21.3763	0
2006-06-23	14.8955	19.9791	15.2749	1.05428				2006-06-23	26.6353	31.4411	19.4553	0.0878098				2006-06-23	26.3611	31.6906	22.0984	0.493375
2006-06-24	28.2916	25.4034	15.6443	0				2006-06-24	21.5004	29.1121	17.5781	0				2006-06-24	18.2796	27.2757	20.0374	1.92288
2006-06-25	30.4184	28.8323	16.8166	0.00909754				2006-06-25	16.3192	24.7262	17.7298	1.32025				2006-06-25	28.4489	33.0789	22.4523	0
2006-06-26	29.1304	29.4939	16.9982	0				2006-06-26	12.5746	22.0511	15.4541	1.12459				2006-06-26	18.9785	26.8154	19.307	0.033115
2006-06-27	29.2567	29.2313	17.9211	0				2006-06-27	13.2912	22.4857	16.0366	0.530905				2006-06-27	22.6559	27.7079	14.1159	0
2006-06-28	29.4186	29.1649	18.1977	0.0449846				2006-06-28	16.3657	23.8511	16.6734	0.755973				2006-06-28	28.3006	28.0304	14.2228	0.0919179
2006-06-29	29.7175	30.2036	17.8672	0				2006-06-29	4.48734	20.3561	15.6141	9.16238				2006-06-29	29.5027	29.0865	16.9491	0
2006-06-30	28.2841	30.402	19.3946	0				2006-06-30	29.1301	29.9702	14.9282	0.0668723				2006-06-30	24.6705	28.3057	18.6131	0.0172228
2006-07-01	26.0666	28.2219	18.759	0.145942				2006-07-01	29.8881	32.3455	19.4189	0.0785637				2006-07-01	24.194	27.4957	19.2777	0.0721286
2006-07-02	25.1106	28.8119	18.1491	0.135258				2006-07-02	25.7859	31.0251	19.6375	0				2006-07-02	19.2363	27.6746	16.0639	0.0867699
2006-07-03	26.4229	29.355	19.6541	0.226338				2006-07-03	25.79	31.5786	17.5067	0.218112				2006-07-03	29.1299	30.883	19.8348	0
2006-07-04	18.1385	26.9894	21.6481	1.17757				2006-07-04	26.3732	34.4873	19.8772	0.326767				2006-07-04	27.7947	32.1139	21.6411	0
2006-07-05	14.5264	25.1781	20.7835	0.568556				2006-07-05	15.1763	21.1238	13.9	2.66209				2006-07-05	25.9529	33.7311	23.4708	0.130382
2006-07-06	16.4363	25.7816	18.2872	1.51871				2006-07-06	28.5062	27.0821	14.8434	0				2006-07-06	28.1815	35.844	19.2497	0.0447133
2006-07-07	27.99	30.1353	19.399	0.116447				2006-07-07	28.2525	28.0025	13.5393	0				2006-07-07	28.7218	34.002	22.2004	0.0800084
2006-07-08	28.6332	34.0161	19.6698	0				2006-07-08	29.3314	24.6629	11.872	0				2006-07-08	23.8727	35.7571	22.8253	0
2006-07-09	23.2825	32.303	18.953	6.43109				2006-07-09	28.9185	25.6192	11.2917	0				2006-07-09	18.4864	33.0444	20.8139	2.52114
2006-07-10	15.2208	22.5539	16.281	0.953681				2006-07-10	29.076	26.3667	12.7407	0				2006-07-10	17.8519	27.5979	18.8709	1.28164
2006-07-11	23.3166	27.6788	16.3478	0				2006-07-11	26.0227	26.3784	16.8619	0				2006-07-11	27.0162	29.3378	19.22	0.355833
2006-07-12	28.2517	31.6892	17.5933	0				2006-07-12	28.2274	29.4053	18.5157	0				2006-07-12	28.4713	31.6703	22.1309	0
2006-07-13	25.5537	31.154	18.5682	0.140736				2006-07-13	26.0814	30.3525	20.4321	0				2006-07-13	21.7248	28.5078	16.8425	0
2006-07-14	12.5523	25.2566	19.8501	0.208369				2006-07-14	19.0534	30.7698	21.5908	0.399146				2006-07-14	9.99829	20.3997	16.1482	0.466188
2006-07-15	29.1244	31.7654	19.9456	0				2006-07-15	19.1908	30.1028	22.133	1.19834				2006-07-15	9.43052	24.1128	15.7484	2.1795
2006-07-16	27.9513	31.0515	17.3932	0				2006-07-16	22.7333	30.2482	22.9033	5.29486				2006-07-16	18.9415	25.0942	17.3226	0.605289
2006-07-17	24.513	29.1785	19.7319	0				2006-07-17	24.528	31.5422	19.7386	0.40177				2006-07-17	28.0582	30.4156	17.9037	0
2006-07-18	26.2183	29.6988	21.3828	0.0404648				2006-07-18	28.0217	34.4768	19.7159	0.00295038				2006-07-18	22.5805	28.7869	19.0531	0
2006-07-19	26.4276	30.2177	22.1753	0.00496405				2006-07-19	28.1905	34.5504	20.4813	0.0204091				2006-07-19	27.6919	31.305	20.4467	0
2006-07-20	24.101	31.6239	23.3824	0.432773				2006-07-20	21.4708	29.1977	18.7845	0				2006-07-20	28.5176	34.3312	22.251	0
2006-07-21	18.7409	27.9753	22.8775	1.77601				2006-07-21	16.6684	26.3179	17.6156	0.142462				2006-07-21	28.2692	34.4564	22.0121	0
2006-07-22	25.0605	29.548	21.8769	1.02244				2006-07-22	11.2172	26.4253	18.9411	0.226365				2006-07-22	23.528	31.454	21.6539	0
2006-07-23	25.0111	28.3181	20.7201	0.66066				2006-07-23	17.843	26.939	19.0122	2.3083				2006-07-23	24.8819	32.5586	21.9886	0.520446
2006-07-24	27.7394	30.742	21.7176	0.093259				2006-07-24	8.66349	22.914	15.1422	13.3267				2006-07-24	16.982	28.4961	18.5637	3.34255
2006-07-25	27.2148	31.3275	22.9087	0.033157				2006-07-25	28.002	29.6185	16.1716	0.286234				2006-07-25	10.9325	23.4349	16.5174	16.0158
2006-07-26	23.8136	32.8946	23.4493	0.3789				2006-07-26	3.55949	22.8847	14.9346	0.0550627				2006-07-26	26.8567	25.4297	16.8892	0.293124
2006-07-27	11.5401	24.9291	20.1244	6.97145				2006-07-27	26.8721	27.5128	11.6227	0				2006-07-27	27.9641	29.3614	17.4994	0
2006-07-28	18.2076	27.9906	23.0356	5.60267				2006-07-28	2.20021	15.1744	9.3338	0.955108				2006-07-28	27.9923	31.4312	19.1506	0
2006-07-29	20.1133	26.2651	21.4608	1.96945				2006-07-29	13.9968	18.2885	10.6053	0.419721				2006-07-29	28.8242	34.0324	19.7497	0
2006-07-30	24.7252	30.8956	23.6967	0.0634399				2006-07-30	26.0454	24.2116	10.7096	0				2006-07-30	28.5876	32.7532	12.6894	0
2006-07-31	16.9771	28.5926	23.4343	1.16728				2006-07-31	24.5025	24.8443	11.4074	0				2006-07-31	29.2017	35.5606	18.3221	0
2006-08-01	12.0937	30.0422	17.2683	0.75444				2006-08-01	26.5384	29.3703	16.7017	0				2006-08-01	27.9247	35.6425	20.894	0
2006-08-02	20.6933	30.7662	17.797	0				2006-08-02	19.417	26.0789	15.5963	0				2006-08-02	23.8524	34.7211	21.0029	0.330056
2006-08-03	20.3933	28.7665	17.8834	0				2006-08-03	20.6042	25.5585	16.8748	0.105153				2006-08-03	15.2201	28.2046	19.3975	0.412757
2006-08-04	27.536	28.8273	18.5917	0.43276				2006-08-04	19.8235	27.7603	19.3087	0.860611				2006-08-04	25.7952	32.7352	23.0161	0.751924
2006-08-05	25.9372	29.5573	17.511	0.0868197				2006-08-05	22.0014	26.3955	16.9185	0.201926				2006-08-05	14.5119	25.9728	19.3029	0.282494
2006-08-06	26.7458	29.3397	18.3108	0.227984				2006-08-06	26.0322	29.6161	18.1761	0.503534				2006-08-06	18.3274	26.5546	17.6421	4.42475
2006-08-07	25.4851	29.5166	19.4577	0.0345955				2006-08-07	24.5103	31.4326	21.4836	0				2006-08-07	10.4552	20.5374	14.6856	32.8747
2006-08-08	25.047	30.3285	20.7743	0				2006-08-08	24.8232	31.6206	21.1396	0.0751027				2006-08-08	10.3909	20.7537	15.8119	0.267375
2006-08-09	23.2982	32.15	22.7692	0.317232				2006-08-09	22.5154	31.3911	21.878	0				2006-08-09	23.7603	29.253	18.0499	0.0653563
2006-08-10	23.8954	34.4062	22.7548	0				2006-08-10	22.8768	31.4744	21.8325	0.834011				2006-08-10	20.4917	25.956	17.1365	0
2006-08-11	24.7077	32.9304	21.777	0.0721123				2006-08-11	7.70417	23.5413	15.6031	4.88091				2006-08-11	26.6954	27.3027	16.5224	0
2006-08-12	22.4173	33.044	21.6308	0				2006-08-12	2.80442	18.2848	12.7565	0.521745				2006-08-12	23.9757	26.1709	18.7805	0.117371
2006-08-13	18.2791	30.2047	17.7056	1.70485				2006-08-13	23.6832	24.1096	14.0507	1.37911				2006-08-13	26.6159	28.4981	17.4222	0
2006-08-14	15.3338	23.463	15.4307	1.26544				2006-08-14	27.2897	26.3398	15.5501	0.316632				2006-08-14	23.4495	29.0011	19.4565	0
2006-08-15	8.78729	17.7801	13.7967	10.5682				2006-08-15	26.916	28.7419	16.0194	0				2006-08-15	25.2056	30.5185	19.6806	0.0047348
2006-08-16	23.1612	21.5178	15.0437	0.0512722				2006-08-16	25.3265	32.3822	19.0572	0				2006-08-16	24.2692	31.4128	15.5854	0
2006-08-17	15.3124	22.4142	16.2063	0.999134				2006-08-17	18.182	29.0484	18.7185	0				2006-08-17	24.1647	30.4126	19.9531	0
2006-08-18	22.0434	25.0343	16.7717	0.526716				2006-08-18	23.8894	30.1081	16.1256	0				2006-08-18	17.5996	30.1265	19.3758	4.50494
2006-08-19	14.155	20.3403	14.3468	0.984011				2006-08-19	17.0226	27.0768	17.4948	0.148231				2006-08-19	23.2462	29.3515	15.2686	0.0414648
2006-08-20	24.9531	25.294	15.347	0.12294				2006-08-20	15.3954	26.5559	16.8543	1.64761				2006-08-20	26.1282	29.006	13.0711	0
2006-08-21	23.9343	26.1938	15.1656	0.504041				2006-08-21	26.4371	28.6841	16.816	0.0910216				2006-08-21	26.0943	30.2803	18.3946	0
2006-08-22	25.4515	27.1126	16.7084	0.0786898				2006-08-22	21.0169	31.7776	19.1744	0.151341				2006-08-22	20.8471	28.441	17.6757	0.0609928
2006-08-23	25.3686	27.6977	17.674	0				2006-08-23	3.12717	22.5627	16.4754	5.6253				2006-08-23	20.1407	26.9002	17.7622	0.0627539
2006-08-24	22.7699	28.332	19.1649	1.05795				2006-08-24	11.0171	21.3435	13.183	0.469174				2006-08-24	20.0727	28.3813	18.6588	0.814143
2006-08-25	2.56614	22.2227	17.5836	4.7288				2006-08-25	15.8019	22.3561	13.2494	3.9265				2006-08-25	11.7193	24.8523	14.877	0.249637
2006-08-26	18.3845	24.0838	18.225	2.5738				2006-08-26	26.8527	25.1632	14.3948	0.135655				2006-08-26	25.1877	28.3234	15.4194	0.0961501
2006-08-27	18.1767	20.9466	15.7058	0.348157				2006-08-27	26.6683	30.7305	14.1419	0.214323				2006-08-27	23.749	27.6648	16.0017	0.180747
2006-08-28	22.704	25.0209	16.227	0				2006-08-28	24.3438	28.5794	17.2241	0				2006-08-28	19.6589	25.8244	14.6152	0.263372
2006-08-29	21.2885	26.8846	17.0312	0.337799				2006-08-29	9.06077	23.1054	14.8363	0.379843				2006-08-29	23.6184	27.4446	15.775	0
2006-08-30	11.6188	20.4584	14.8652	3.21341				2006-08-30	21.8749	26.8217	12.3335	0				2006-08-30	23.5999	29.8828	15.3265	0
2006-08-31	23.5006	25.2134	11.684	0.0106725				2006-08-31	23.3428	25.4257	13.3811	0.0367332				2006-08-31	23.7605	31.3523	16.1356	0
2006-09-01	20.9575	21.9365	12.0822	0.393362				2006-09-01	23.1545	25.137	16.6417	0.264516				2006-09-01	23.6411	29.0873	16.9194	0.252847
2006-09-02	21.6266	22.0816	12.7365	0.225758				2006-09-02	12.3109	23.9262	13.2491	0				2006-09-02	22.252	28.4237	16.302	0.444957
2006-09-03	22.3762	24.995	14.7277	0.157008				2006-09-03	23.1195	26.2533	16.1087	0				2006-09-03	23.056	33.0001	16.4292	0
2006-09-04	22.0554	25.6679	14.695	0.0477635				2006-09-04	18.8651	25.0639	16.6319	0.468077				2006-09-04	23.7319	33.993	18.5735	0
2006-09-05	21.3117	27.0089	17.7064	0.131301				2006-09-05	13.8296	22.3783	14.4519	0.279369				2006-09-05	23.5176	33.4638	18.498	0.0201564
2006-09-06	13.9608	25.1314	17.7734	0.0651055				2006-09-06	22.8065	27.2537	16.2546	0.0843828				2006-09-06	22.3667	37.5213	17.6394	0.148639
2006-09-07	17.9383	24.959	18.0805	0.0832436				2006-09-07	21.1249	30.6518	18.0096	0.209677				2006-09-07	22.1481	35.0627	18.6139	0
2006-09-08	15.1866	25.2231	16.1624	0				2006-09-08	22.6212	26.4965	14.5237	0.103916				2006-09-08	22.6043	38.2129	15.5101	0
2006-09-09	14.6067	26.3156	15.855	0.957383				2006-09-09	21.4614	20.8869	11.9941	0				2006-09-09	16.4088	28.3573	17.4629	0.339728
2006-09-10	9.73842	22.9219	16.8827	0.575732				2006-09-10	22.3198	22.2676	12.8665	0				2006-09-10	15.5194	25.9305	15.914	0.174799
2006-09-11	12.3683	23.3073	15.8992	0.932679				2006-09-11	22.3221	22.6731	12.2512	0				2006-09-11	13.7061	28.4232	16.8938	1.58928
2006-09-12	18.1431	27.7363	16.0261	0.212884				2006-09-12	14.6906	22.378	12.6924	0				2006-09-12	12.0551	27.4649	18.1519	6.78564
2006-09-13	17.0143	27.1911	17.2898	0.0915818				2006-09-13	15.4724	24.5958	13.3537	0.151635				2006-09-13	19.6904	25.4194	13.5258	0
2006-09-14	20.6734	29.2725	16.6606	0				2006-09-14	7.53721	22.3532	13.3351	1.51859				2006-09-14	17.4373	22.6371	14.413	0.0440388
2006-09-15	19.7456	29.3123	16.2969	0.214389				2006-09-15	13.2534	22.7811	12.9215	1.25075				2006-09-15	16.0083	23.4609	13.7256	0.0506856
2006-09-16	10.4605	21.5233	12.7258	1.92757				2006-09-16	18.3481	24.9013	13.8897	1.68629				2006-09-16	10.7582	20.5898	13.5129	0.991504
2006-09-17	18.1196	25.4845	13.204	0.0542965				2006-09-17	11.949	23.6647	15.4842	3.28335				2006-09-17	9.88928	25.6902	15.6776	1.20243
2006-09-18	19.2097	25.8167	14.0543	0.915637				2006-09-18	5.6016	17.7511	11.206	10.7566				2006-09-18	8.42775	19.7591	11.9186	2.54001
2006-09-19	17.075	25.302	14.6977	0.059692				2006-09-19	14.869	20.929	11.3364	0.0739744				2006-09-19	8.44609	12.757	8.21448	1.42915
2006-09-20	21.1335	27.9389	13.785	0.0358428				2006-09-20	10.579	19.5919	8.79791	0.614321				2006-09-20	8.89933	14.0793	5.15945	2.90886
2006-09-21	21.047	31.3809	14.0573	0				2006-09-21	20.0552	24.5255	13.4999	0.041356				2006-09-21	11.9096	19.2881	7.91309	0.0193868
2006-09-22	10.4847	18.9975	10.4605	0.0898435				2006-09-22	12.0411	23.1689	13.0226	0.186872				2006-09-22	18.5887	22.166	10.149	0
2006-09-23	18.3769	23.4021	10.4904	1.2362				2006-09-23	13.5877	23.92	14.1261	0.837043				2006-09-23	20.2636	23.9666	10.342	0
2006-09-24	9.1733	20.0729	13.7411	8.83237				2006-09-24	4.53595	20.1654	11.4776	0.666832				2006-09-24	20.2666	25.6914	11.5717	0
2006-09-25	6.92654	20.5934	10.837	2.07848				2006-09-25	4.57959	16.0609	7.22009	2.72884				2006-09-25	19.4025	25.4851	12.6831	0
2006-09-26	18.0695	21.832	10.3102	0.0637441				2006-09-26	8.2349	15.4705	5.60361	0.888835				2006-09-26	20.1693	26.3263	12.7931	0
2006-09-27	19.2802	24.2829	12.7528	0.102448				2006-09-27	17.8848	20.5482	7.96957	0.101108				2006-09-27	18.7952	27.9901	13.1371	0
2006-09-28	13.3346	22.9678	13.7246	0.0699179				2006-09-28	10.0871	20.7015	7.81055	0.108291				2006-09-28	19.3333	27.2645	14.5278	2.8651
2006-09-29	17.1945	23.8902	13.9094	0.0944975				2006-09-29	18.5298	20.4614	6.80212	0.0160492				2006-09-29	12.7606	22.6472	8.67841	0.597413
2006-09-30	16.9404	24.2324	4.95612	4.24439				2006-09-30	18.1816	23.7432	8.1542	0.303234				2006-09-30	18.3302	20.5958	7.32901	0
2006-10-01	7.92043	14.9392	3.21301	0.133126				2006-10-01	17.2833	24.4038	8.23361	0.0713491				2006-10-01	19.5898	22.6225	8.17319	0
2006-10-02	17.11	15.1643	3.08035	0				2006-10-02	17.0888	22.7259	11.6536	0.148501				2006-10-02	19.3421	24.5656	7.20529	0
2006-10-03	16.8371	18.5461	4.54575	0.00769123				2006-10-03	17.9687	26.7635	11.4872	0.0952957				2006-10-03	19.5003	24.8835	9.05704	0
2006-10-04	20.0453	18.3759	4.34033	0				2006-10-04	17.8868	20.4642	9.29688	0.425952				2006-10-04	18.4114	18.9625	5.94693	0
2006-10-05	18.922	21.4618	4.33969	0				2006-10-05	7.51419	13.8854	4.66382	0.964447				2006-10-05	18.4049	24.0039	9.16422	0.0283734
2006-10-06	17.9579	22.3958	6.83432	0.020735				2006-10-06	17.6451	19.986	6.01605	0				2006-10-06	17.9174	22.665	11.0822	0
2006-10-07	16.6603	23.8078	9.3909	0.0940019				2006-10-07	17.2203	27.1913	9.44385	0				2006-10-07	16.261	23.7336	10.9507	0.00964975
2006-10-08	18.6216	20.9313	8.26312	0				2006-10-08	12.8885	20.1599	8.79282	0.0540658				2006-10-08	15.5632	25.3418	7.01199	0.797498
2006-10-09	17.2417	21.234	7.53827	0				2006-10-09	6.72251	15.8742	4.92139	7.97754				2006-10-09	17.5864	14.8714	3.63922	0
2006-10-10	16.0519	18.3901	8.17844	0				2006-10-10	12.4934	17.8753	8.03464	0.406686				2006-10-10	10.9997	11.2538	3.29489	0.0496952
2006-10-11	16.8352	23.8814	7.78186	0.0559663				2006-10-11	14.5439	17.3882	6.86713	0.930222				2006-10-11	17.01	15.7477	3.13113	0
2006-10-12	13.3086	21.6734	9.98099	0				2006-10-12	6.11385	12.265	4.70129	6.36457				2006-10-12	17.031	13.3089	2.11081	0
2006-10-13	16.3185	21.3426	8.74088	0.116936				2006-10-13	7.61716	11.8154	4.45633	0.726936				2006-10-13	16.9874	17.2009	2.64926	0
2006-10-14	15.0855	19.5314	6.96716	0.0722456				2006-10-14	8.8459	13.5102	3.1781	2.4729				2006-10-14	17.1297	19.5818	4.63394	0.380445
2006-10-15	14.8251	18.4681	6.8132	0.0167171				2006-10-15	9.50912	14.0422	4.1438	0.627164				2006-10-15	15.6503	19.8819	4.91663	0
2006-10-16	11.24	17.9661	6.80942	0.0315235				2006-10-16	15.3486	17.8883	2.96805	0				2006-10-16	16.6325	16.6319	0.70401	0
2006-10-17	14.4549	18.2733	6.16486	0.0214453				2006-10-17	10.8656	13.0769	2.50821	4.88997				2006-10-17	16.9332	16.6377	3.47263	0
2006-10-18	15.6337	16.8768	5.2149	0.0263813				2006-10-18	3.65306	6.38812	-1.61124	1.64505				2006-10-18	16.2951	17.9043	4.8894	0.12388
2006-10-19	13.5694	17.5496	4.38553	0.0181112				2006-10-19	13.4108	9.95911	-4.98743	0.106306				2006-10-19	16.1978	20.9707	3.22101	0
2006-10-20	15.5986	14.6793	1.85113	0				2006-10-20	5.58394	9.89575	1.49231	0.86007				2006-10-20	16.0268	22.9413	7.07477	0
2006-10-21	15.3598	20.9994	1.60181	0.0202818				2006-10-21	10.2968	11.3704	0.724792	0.145338				2006-10-21	9.00574	14.7825	7.72388	2.25024
2006-10-22	11.9589	14.8593	1.98303	0.0561423				2006-10-22	15.2964	20.6808	4.4436	0.155104				2006-10-22	6.26454	10.9182	2.31949	1.04192
2006-10-23	15.3959	13.4046	-0.597473	0				2006-10-23	8.18512	15.5151	2.94571	0				2006-10-23	9.9399	16.5396	2.34219	0.040853
2006-10-24	15.2332	17.1006	-1.1962	0.0584574				2006-10-24	14.2823	18.2272	1.83289	0				2006-10-24	14.6627	20.1719	3.74515	0
2006-10-25	14.4391	19.3156	7.01013	0.068097				2006-10-25	14.6898	15.1256	4.57819	0				2006-10-25	14.3715	18.8477	5.38348	0.0393088
2006-10-26	12.7045	17.9767	5.64871	0.592579				2006-10-26	10.6845	16.6538	2.44144	0.254701				2006-10-26	14.8527	18.4623	7.43994	0
2006-10-27	10.1912	14.2344	4.57999	0.0670805				2006-10-27	14.7044	14.0844	2.66962	0.0760362				2006-10-27	10.3814	17.2281	1.57217	0
2006-10-28	12.5508	17.1126	6.60742	0				2006-10-28	14.242	12.2402	-1.50436	0.286405				2006-10-28	13.1144	14.1074	-4.50006	0.0185285
2006-10-29	13.721	20.8147	7.00223	0.0649759				2006-10-29	6.83071	12.4522	-1.17129	0.21152				2006-10-29	14.0806	15.5586	1.17847	0
2006-10-30	5.08327	10.9397	0.738831	0.247269				2006-10-30	13.5669	16.6474	3.81088	0				2006-10-30	12.1057	14.6613	2.98831	0.113789
2006-10-31	6.14278	8.58463	-1.67758	0.0315156				2006-10-31	13.3543	16.3984	3.34824	0.434539				2006-10-31	13.9636	16.2062	3.25418	0.0558198
2006-11-01	13.8785	12.9901	-1.77966	0				2006-11-01	8.02155	14.637	2.5163	0.402764				2006-11-01	12.8679	18.0086	4.86227	0.013379
2006-11-02	13.8681	17.1009	-0.541229	0.0314475				2006-11-02	13.5887	16.689	1.86685	0				2006-11-02	13.3251	15.8107	2.25696	0.0149004
2006-11-03	12.6625	13.1771	-1.25491	0.00698274				2006-11-03	6.36453	13.5806	1.51041	0.10502				2006-11-03	11.4109	12.1801	-1.02985	0.01216
2006-11-04	13.4664	12.6131	-2.2435	0				2006-11-04	11.4455	15.9799	2.29813	0.050098				2006-11-04	13.4144	16.2791	0.145447	0
2006-11-05	11.5614	10.1199	-2.5047	0.0221524				2006-11-05	11.695	15.1913	2.82764	0				2006-11-05	13.5588	18.3845	4.88055	0
2006-11-06	7.25519	10.607	-1.59003	2.23639				2006-11-06	11.2442	16.4731	0.49411	0				2006-11-06	7.04522	18.5759	1.67304	0.307738
2006-11-07	8.53264	5.66644	-2.86472	0.099057				2006-11-07	12.5517	15.719	1.42996	0				2006-11-07	6.95193	7.12225	-1.78189	1.09279
2006-11-08	13.2114	8.52927	-2.68829	0				2006-11-08	12.1281	13.93	-1.58023	0				2006-11-08	11.3907	8.98321	-1.85669	0
2006-11-09	13.2845	11.31	-1.49783	0				2006-11-09	12.457	9.77612	-0.389069	0				2006-11-09	12.6784	7.61804	-2.43704	0
2006-11-10	11.1353	10.3795	0.725922	0				2006-11-10	12.4554	13.8794	-0.449432	0				2006-11-10	13.0615	11.534	0.553833	0
2006-11-11	11.4244	10.2827	-6.35147	0.478561				2006-11-11	9.86335	11.5063	-2.47516	0				2006-11-11	13.084	18.068	2.77197	0
2006-11-12	11.9215	2.6084	-6.99249	0				2006-11-12	12.3209	14.3788	-1.75909	0				2006-11-12	9.32346	12.0354	-1.50351	0
2006-11-13	12.4773	5.15842	-4.4451	0				2006-11-13	11.2439	8.00336	1.01849	0.259265				2006-11-13	12.594	8.21213	-2.25665	0
2006-11-14	12.1519	4.05685	-2.39267	0				2006-11-14	4.57299	6.21881	-2.08035	0.126911				2006-11-14	12.3147	11.1124	0.324341	0
2006-11-15	9.76372	5.9158	-2.37027	0				2006-11-15	11.1822	7.18399	-1.32349	0.00705463				2006-11-15	11.812	17.1206	2.20367	0
2006-11-16	11.9396	6.7489	-1.40747	0				2006-11-16	7.5261	9.18866	-2.79434	0.207989				2006-11-16	11.3224	5.8176	-3.36557	0
2006-11-17	11.8538	6.56119	-1.68192	0				2006-11-17	9.47835	7.71475	-1.9126	0				2006-11-17	11.4596	5.15518	-3.65518	0.0212589
2006-11-18	11.9109	8.04422	-1.09982	0				2006-11-18	5.82608	7.37436	-1.72	0				2006-11-18	8.99275	9.16299	-1.36835	0.0280537
2006-11-19	11.257	7.37698	-1.86853	0				2006-11-19	11.2523	12.4256	-0.923675	0				2006-11-19	11.3457	15.9072	1.31747	0
2006-11-20	10.9688	9.16065	-2.52698	0.0105964				2006-11-20	10.4322	9.9621	-0.61441	0				2006-11-20	8.79679	9.28622	-0.224518	0.141765
2006-11-21	10.6976	9.50433	-0.0281372	0				2006-11-21	10.2652	9.71317	-0.632111	0				2006-11-21	9.22979	5.43338	-2.71823	0.036079
2006-11-22	10.0403	7.40936	-1.92535	0.0178866				2006-11-22	7.94553	9.34659	-0.762726	0.0404875				2006-11-22	8.86811	3.62207	-4.48212	0.00893967
2006-11-23	5.10435	4.90323	-3.30649	0.056085				2006-11-23	10.5132	11.8589	-2.70157	0				2006-11-23	11.1848	3.02481	-6.54477	0
2006-11-24	10.9273	4.25089	-3.77765	0				2006-11-24	7.7786	7.61655	-1.23251	0.409417				2006-11-24	10.5843	3.1817	-5.39938	0
2006-11-25	10.3536	4.23679	-2.52136	0				2006-11-25	7.93024	3.45697	-4.69736	0.0369403				2006-11-25	10.0174	3.84933	-3.71652	0.0454313
2006-11-26	10.8627	4.17246	-2.83954	0				2006-11-26	10.7025	6.66721	-3.84701	0				2006-11-26	6.63164	0.211273	-6.86401	0.049772
2006-11-27	10.7811	4.5473	-2.45126	0				2006-11-27	10.6914	7.17474	-6.11585	0				2006-11-27	10.4471	0.247681	-8.56055	0.0093266
2006-11-28	10.4325	6.43686	-2.3923	0				2006-11-28	8.52856	3.23627	-8.79706	0.161888				2006-11-28	10.3444	-0.0715027	-8.33334	0
2006-11-29	9.20186	8.11826	-2.68915	0.00807263				2006-11-29	9.7326	-0.930786	-10.1884	0				2006-11-29	10.5967	2.66043	-6.79257	0
2006-11-30	10.2485	5.98767	-2.60138	0				2006-11-30	9.70787	-0.366211	-13.5884	0				2006-11-30	10.2928	2.66446	-8.0307	0
2006-12-01	7.92025	7.67758	-1.24936	0				2006-12-01	10.5299	-1.36252	-12.7124	0				2006-12-01	10.4138	4.4324	-7.09683	0
2006-12-02	9.31444	10.6093	-1.89441	0				2006-12-02	10.4464	0.434631	-10.8463	0				2006-12-02	10.0075	2.65356	-7.43454	0
2006-12-03	9.35351	12.9553	-1.39145	0				2006-12-03	9.71919	-0.933563	-9.30423	0				2006-12-03	10.2198	1.95938	-6.52173	0
2006-12-04	9.31029	14.4324	-0.670471	0				2006-12-04	7.29896	-0.405579	-9.74863	0				2006-12-04	10.4537	4.84302	-6.19894	0
2006-12-05	8.46198	9.14313	-8.83853	0.105011				2006-12-05	10.0651	0.221985	-11.3692	0				2006-12-05	10.0916	6.08286	-4.32843	0
2006-12-06	3.24882	-7.11551	-14.1084	0.0170981				2006-12-06	8.78162	0.767456	-9.38312	0				2006-12-06	7.66452	1.01346	-9.30997	0
2006-12-07	9.10446	-1.43796	-14.3661	0				2006-12-07	10.0895	0.667816	-8.52512	0				2006-12-07	9.94152	4.45136	-7.82919	0
2006-12-08	9.00959	1.25992	-10.2887	0				2006-12-08	9.96487	3.32355	-6.32455	0				2006-12-08	9.66835	9.16098	-3.46716	0
2006-12-09	9.5694	5.69864	-8.31531	0				2006-12-09	9.11437	5.64844	-4.78464	0				2006-12-09	5.86647	-3.2085	-12.4033	0.0115781
2006-12-10	9.07138	3.38467	-4.94235	0				2006-12-10	10.0166	6.34616	-6.45239	0				2006-12-10	8.31896	-6.45029	-16.079	0.0341643
2006-12-11	7.70152	1.15286	-11.372	0.0553789				2006-12-11	9.46468	4.0846	-4.93112	0				2006-12-11	7.6177	3.26392	-7.48328	0.0127417
2006-12-12	3.05547	-7.57547	-13.1433	0.0303146				2006-12-12	9.39366	4.38065	-4.86087	0				2006-12-12	9.52832	4.60281	-5.07846	0
2006-12-13	9.72016	-6.00961	-13.5294	0				2006-12-13	9.25385	1.48483	-7.70151	0				2006-12-13	8.32466	-0.25647	-9.58804	0
2006-12-14	9.85744	-6.06198	-15.2522	0				2006-12-14	9.25515	3.63687	-8.39969	0				2006-12-14	9.84978	3.09076	-10.2052	0
2006-12-15	10.1709	-5.63962	-12.7723	0				2006-12-15	9.49978	2.71292	-5.7381	0				2006-12-15	9.85906	4.88034	-6.58264	0
2006-12-16	9.34309	-4.09198	-14.2908	0				2006-12-16	8.1492	4.63711	-9.13177	0				2006-12-16	9.61603	2.99161	-7.36801	0
2006-12-17	9.94001	-4.72052	-14.4831	0				2006-12-17	8.87726	3.69589	-7.76184	0				2006-12-17	8.35412	3.7424	-7.33969	0
2006-12-18	9.83113	-4.3533	-15.3856	0				2006-12-18	6.98186	4.19821	-8.51562	0.0449924				2006-12-18	7.73156	-1.39438	-15.8659	0
2006-12-19	9.70538	-0.951782	-15.9328	0				2006-12-19	5.3266	-7.94919	-15.7247	0.0878794				2006-12-19	9.69314	-2.15454	-16.8885	0
2006-12-20	9.30879	-0.467133	-12.3925	0				2006-12-20	9.01049	-10.9131	-18.9461	0				2006-12-20	6.64875	1.49853	-6.45493	0
2006-12-21	8.92804	1.97336	-12.1966	0				2006-12-21	9.90079	-6.46271	-18.6617	0				2006-12-21	9.79519	5.31644	-6.3616	0
2006-12-22	9.51217	1.08615	-12.8948	0				2006-12-22	9.86933	-11.1376	-18.982	0				2006-12-22	7.45034	-0.950165	-15.6769	0.0263952
2006-12-23	9.45589	-6.13214	-14.5016	0				2006-12-23	10.3192	-6.43085	-19.7776	0				2006-12-23	7.6775	-8.90039	-18.9002	0
2006-12-24	6.90236	-6.87024	-14.1684	0				2006-12-24	8.28073	-4.91867	-13.3609	0				2006-12-24	9.28844	-10.5821	-19.609	0
2006-12-25	9.63223	-4.73614	-14.0048	0				2006-12-25	9.47218	-0.981354	-11.1897	0				2006-12-25	9.64354	-4.18189	-15.5477	0
2006-12-26	9.42058	2.45987	-12.7896	0				2006-12-26	9.93363	2.55649	-9.28854	0				2006-12-26	9.79444	2.00247	-11.6218	0
2006-12-27	9.03713	1.28403	-11.9393	0				2006-12-27	8.10938	2.50143	-8.71823	0				2006-12-27	9.9512	0.974854	-10.4641	0
2006-12-28	8.85653	-1.50131	-11.555	0				2006-12-28	9.69554	1.99445	-9.21903	0				2006-12-28	9.95718	2.57236	-10.0924	0
2006-12-29	9.96525	3.17386	-10.4171	0				2006-12-29	9.815	3.26843	-9.21729	0				2006-12-29	9.48921	3.20285	-8.27542	0
2006-12-30	9.69626	3.67206	-9.4451	0				2006-12-30	9.59233	5.50433	-6.08975	0				2006-12-30	7.08671	1.28763	-7.10046	0.00646778
2006-12-31	9.83416	4.04562	-8.06293	0				2006-12-31	8.2295	4.99747	-5.78241	0				2006-12-31	5.51751	1.95544	-8.36298	0.0109329
2007-01-01	9.01854	3.40109	-7.25726	0				2007-01-01	9.16266	3.14597	-8.02231	0				2007-01-01	9.31081	5.72696	-5.20816	0
2007-01-02	7.67734	4.90591	-6.41925	0				2007-01-02	7.96707	0.599152	-9.38586	0				2007-01-02	8.07188	1.86002	-7.94171	0
2007-01-03	9.14768	7.6676	-3.18741	0				2007-01-03	9.52554	4.66165	-6.91833	0				2007-01-03	5.10747	-3.86169	-13.0361	0
2007-01-04	9.27851	7.71942	-2.54834	0				2007-01-04	7.80213	4.72415	-6.69696	0.00961414				2007-01-04	10.065	-2.44794	-14.2923	0
2007-01-05	9.5491	6.47788	-3.76028	0				2007-01-05	6.30892	-2.14462	-12.468	0.180125				2007-01-05	9.49613	-0.197449	-12.3046	0
2007-01-06	9.20693	7.06519	-3.51126	0				2007-01-06	10.233	-5.76056	-15.5532	0				2007-01-06	9.1553	-4.49704	-14.9067	0
2007-01-07	6.31933	2.16614	-6.25797	4.13255				2007-01-07	8.82623	-4.4541	-13.4615	0.0207947				2007-01-07	10.3622	-7.06372	-16.1674	0
2007-01-08	6.3089	-1.5105	-11.0479	0.0340319				2007-01-08	9.31963	0.616974	-11.8062	0				2007-01-08	9.3545	-6.73257	-16.2006	0
2007-01-09	10.3714	-3.16504	-12.7576	0				2007-01-09	9.62863	1.17996	-11.1477	0				2007-01-09	10.698	-4.82211	-16.9262	0
2007-01-10	9.46095	-3.66159	-13.916	0				2007-01-10	10.0725	-1.65173	-11.7863	0				2007-01-10	10.2388	-2.88846	-14.7277	0
2007-01-11	9.51945	-4.0238	-14.5257	0				2007-01-11	6.63776	-1.10748	-10.8332	0				2007-01-11	8.73701	-1.15802	-13.8499	0
2007-01-12	6.98728	-2.53488	-12.2127	0				2007-01-12	10.5317	3.81436	-8.06302	0				2007-01-12	9.88133	1.91415	-11.2813	0
2007-01-13	10.5039	0.728424	-12.7931	0				2007-01-13	9.98772	0.923767	-7.16336	0.0352549				2007-01-13	8.31636	-0.463501	-10.6151	1.37264
2007-01-14	9.98573	-1.23981	-13.2802	0				2007-01-14	8.67448	-1.44663	-11.5233	0.091089				2007-01-14	8.04958	-0.365112	-11.7072	0
2007-01-15	11.1338	1.42331	-14.1017	0				2007-01-15	3.65803	-7.14703	-16.6529	0.193895				2007-01-15	10.7374	1.22226	-10.923	0
2007-01-16	9.90067	-2.8215	-12.9784	0				2007-01-16	10.6092	-6.76752	-18.3814	0				2007-01-16	9.33674	1.10513	-10.241	0.00735938
2007-01-17	10.2888	-10.1878	-15.6358	0				2007-01-17	10.8953	-10.37	-19.7476	0.0216842				2007-01-17	10.4335	-2.12613	-12.1266	0
2007-01-18	11.3236	-10.0326	-17.943	0				2007-01-18	7.89442	-7.48596	-20.7363	0.221258				2007-01-18	11.5541	0.402039	-11.9553	0
2007-01-19	11.6645	-1.89902	-17.4197	0				2007-01-19	6.41854	-5.68008	-15.8079	0.887903				2007-01-19	11.2002	-1.16635	-12.9075	0
2007-01-20	9.56231	-0.379822	-13.0896	0				2007-01-20	10.9106	-2.34705	-14.8498	0.0736481				2007-01-20	11.3798	-0.461823	-13.0195	0
2007-01-21	10.8292	-3.87094	-14.7391	0				2007-01-21	8.41473	-0.646545	-12.218	0				2007-01-21	5.37537	2.20453	-8.96658	0
2007-01-22	11.674	-4.10928	-16.134	0				2007-01-22	10.3584	-3.89539	-12.92	0				2007-01-22	10.9737	3.05502	-9.35538	0
2007-01-23	11.7681	-2.62894	-15.17	0				2007-01-23	11.4389	-4.16928	-16.435	0				2007-01-23	8.14055	4.11386	-7.17773	0
2007-01-24	11.3541	-0.318817	-13.779	0				2007-01-24	10.146	1.39072	-11.9244	0				2007-01-24	11.439	4.44354	-5.34903	0
2007-01-25	11.2971	2.34323	-9.86804	0				2007-01-25	7.6139	-3.19968	-12.6273	0				2007-01-25	7.82674	1.77182	-7.51318	0.0158103
2007-01-26	9.68936	-0.797424	-9.99582	0.00581406				2007-01-26	8.64198	-4.36038	-17.418	0.104007				2007-01-26	9.84019	-0.326721	-11.258	0.0416092
2007-01-27	7.25685	-3.02033	-11.0769	0.0329798				2007-01-27	11.4557	-9.95761	-20.365	0.0119848				2007-01-27	9.26298	-1.0636	-10.3234	0
2007-01-28	7.93659	-6.60654	-16.376	0				2007-01-28	11.2872	-9.10284	-18.3333	0.00714722				2007-01-28	6.14983	-0.286438	-10.0163	0.0220324
2007-01-29	11.9651	-9.42114	-17.7798	0				2007-01-29	11.191	-10.35	-19.7197	0				2007-01-29	6.2784	-2.07285	-10.9039	0.0752716
2007-01-30	13.4003	-4.58731	-19.0446	0				2007-01-30	12.24	-8.74384	-19.9292	0				2007-01-30	10.6523	-3.03171	-13.4218	0.00996382
2007-01-31	12.0143	-4.18857	-16.6292	0				2007-01-31	12.3934	-6.00928	-17.7233	0				2007-01-31	12.612	-1.92419	-13.567	0
2007-02-01	12.3172	-2.03168	-14.0937	0				2007-02-01	11.8709	-4.78128	-15.5605	0				2007-02-01	12.5675	-2.07355	-13.0016	0
2007-02-02	13.074	2.98682	-14.4057	0				2007-02-02	12.8575	-4.01504	-16.7516	0				2007-02-02	12.2013	1.99875	-11.4146	0
2007-02-03	12.8564	-1.90076	-11.5102	0				2007-02-03	12.5906	4.11917	-9.70407	0				2007-02-03	12.6139	3.66095	-5.99985	0
2007-02-04	13.1595	0.470184	-11.2727	0				2007-02-04	12.8027	8.17184	-5.41611	0				2007-02-04	7.5336	2.9671	-7.14362	0
2007-02-05	13.0814	2.70099	-8.7489	0				2007-02-05	11.5262	7.45608	-5.48996	0				2007-02-05	5.89963	0.519653	-9.47357	0.0264228
2007-02-06	12.3096	2.69919	-6.77884	0.292097				2007-02-06	12.612	5.06583	-7.0614	0				2007-02-06	7.54504	-2.80301	-12.8993	0.0295512
2007-02-07	10.8396	-1.03036	-11.5074	0.0166768				2007-02-07	12.2631	3.60403	-7.46173	0				2007-02-07	13.6208	3.3746	-8.50537	0
2007-02-08	12.8	-0.463318	-12.4295	0				2007-02-08	11.74	6.5929	-3.04144	0.00959599				2007-02-08	12.0598	7.76379	-6.51846	0
2007-02-09	12.6615	7.41556	-8.49692	0				2007-02-09	5.03644	3.52173	-6.43988	0.32119				2007-02-09	13.5937	8.9801	-2.82993	0
2007-02-10	11.152	7.25842	-3.95331	0.00978105				2007-02-10	13.7352	7.89545	-5.7294	0				2007-02-10	11.5755	8.89355	-3.70941	0
2007-02-11	11.4694	0.0693665	-12.1143	0.0457629				2007-02-11	12.9854	10.5857	-2.6051	0				2007-02-11	11.9099	11.6816	-2.22421	0
2007-02-12	12.7188	-4.06876	-13.8142	0				2007-02-12	11.5221	11.7164	-0.733826	0				2007-02-12	10.7887	12.3203	-4.29727	0.0110701
2007-02-13	13.7933	0.953735	-13.4345	0				2007-02-13	12.3072	8.75317	-2.21152	0				2007-02-13	6.19935	-5.29654	-14.5378	2.85472
2007-02-14	13.3435	-0.352539	-11.0765	0				2007-02-14	14.1626	9.15952	-2.28009	0				2007-02-14	12.4954	-2.3093	-17.7689	0.0297723
2007-02-15	12.9761	2.07761	-11.5142	0				2007-02-15	12.6007	10.8606	-0.450958	0.0298358				2007-02-15	14.5173	1.79355	-9.27298	0
2007-02-16	7.73564	0.631287	-8.19049	0.810616				2007-02-16	8.35621	6.08853	-2.96249	0.0519639				2007-02-16	10.3714	1.15097	-8.35736	0.230579
2007-02-17	10.4797	1.91046	-9.02722	0.0864147				2007-02-17	13.6263	8.77866	-2.83221	0				2007-02-17	8.16769	-2.44159	-11.6761	0.623596
2007-02-18	13.0954	6.88144	-3.49887	0				2007-02-18	6.35216	2.24829	-7.72528	0.174287				2007-02-18	14.282	0.668427	-12.1724	0.0166866
2007-02-19	12.9012	8.30933	-3.23694	0				2007-02-19	14.8632	2.05749	-8.92557	0				2007-02-19	15.5885	0.502747	-9.27371	0
2007-02-20	11.4351	7.2233	-6.88672	0				2007-02-20	13.421	7.39175	-4.88626	0				2007-02-20	12.2814	2.29648	-8.68308	0.00971197
2007-02-21	8.03322	-3.1781	-11.9916	0.0631047				2007-02-21	13.0152	11.0663	-0.943207	0				2007-02-21	10.7555	0.0132751	-9.20377	0.019766
2007-02-22	5.46338	-7.92715	-13.4031	0.110822				2007-02-22	15.305	11.3325	-2.0275	0				2007-02-22	13.0381	6.49353	-6.71851	0
2007-02-23	4.47745	-7.35657	-13.4551	1.88782				2007-02-23	10.0431	10.6007	-1.63159	0.131203				2007-02-23	15.4736	8.24127	-5.31638	0.0808645
2007-02-24	4.75749	-4.74399	-15.829	1.10384				2007-02-24	9.57615	6.23196	-3.02695	0				2007-02-24	5.89906	2.46924	-7.00232	0.186967
2007-02-25	16.6091	1.85193	-16.9389	0				2007-02-25	12.6896	4.81222	-4.46323	0				2007-02-25	12.9343	7.1315	-3.72989	0
2007-02-26	15.0292	7.32352	-8.72617	0.0245765				2007-02-26	16.2984	3.70862	-6.54233	0.0323196				2007-02-26	11.3597	5.86899	-3.30261	0.0195779
2007-02-27	13.4766	4.96722	-6.09741	0.117142				2007-02-27	16.7485	12.2738	-1.26175	0				2007-02-27	16.4681	9.39859	-3.19043	0.03865
2007-02-28	10.4855	0.245911	-6.25882	0.0968334				2007-02-28	17.2115	9.85214	-0.924408	0				2007-02-28	8.48596	2.17896	-6.36005	0.443842
2007-03-01	17.017	7.25504	-4.64484	0.0145323				2007-03-01	13.9591	11.4291	1.27966	0.106004				2007-03-01	8.73738	2.07587	-7.92667	0.227953
2007-03-02	14.6134	6.88669	-6.63208	0.201018				2007-03-02	7.77441	7.29007	-0.753357	0.571994				2007-03-02	14.7884	2.18869	-10.3321	0.0229228
2007-03-03	14.7438	1.32852	-7.18436	0.05426				2007-03-03	14.7923	8.18701	-3.81265	0.0503469				2007-03-03	18.7087	4.36081	-6.80945	0
2007-03-04	15.7452	2.28375	-6.29788	0.00931589				2007-03-04	16.0852	13.0167	-1.53272	0.0891807				2007-03-04	18.771	6.13351	-4.79739	0
2007-03-05	16.7887	4.87057	-5.61435	0				2007-03-05	18.2366	11.464	0.664154	0				2007-03-05	19.4407	13.9368	-1.52765	0
2007-03-06	15.3324	4.96664	-5.26471	0.750773				2007-03-06	17.0186	13.1961	-0.572479	0				2007-03-06	17.6995	15.4119	1.44376	0
2007-03-07	10.8092	4.59103	-3.96875	0.0852836				2007-03-07	18.0369	9.90375	0.827728	0.0229311				2007-03-07	18.485	14.5263	1.44098	0
2007-03-08	18.7834	6.68945	-4.80368	0				2007-03-08	14.5059	16.7336	1.42712	0.0242124				2007-03-08	15.6484	27.7224	4.32221	0.0107901
2007-03-09	15.0291	9.13306	-3.71115	0.0767083				2007-03-09	15.199	16.2146	2.81473	0				2007-03-09	19.1445	21.0686	3.43582	0.0870303
2007-03-10	12.0669	8.52737	-2.96197	0.063324				2007-03-10	10.5889	10.6758	0.629242	0.20754				2007-03-10	13.8363	11.6358	0.0399475	0.234841
2007-03-11	8.30668	3.60425	-5.4819	0.0481573				2007-03-11	19.4391	8.43335	-1.98187	0				2007-03-11	15.8	12.1638	-1.57745	0.0110953
2007-03-12	15.9543	3.30566	-6.19064	0.0288109				2007-03-12	19.2895	10.6717	0.484283	0				2007-03-12	19.2234	18.1177	3.5943	0.0569834
2007-03-13	17.8193	1.98935	-5.06564	0				2007-03-13	19.5655	12.3739	2.2681	0.0264845				2007-03-13	18.7134	17.7547	4.11688	0.169373
2007-03-14	16.6428	3.76205	-5.40543	0				2007-03-14	17.8277	10.9904	1.93582	0.0222555				2007-03-14	2.95165	5.59848	-1.04862	2.10782
2007-03-15	21.2225	7.89609	-2.34741	0				2007-03-15	17.5856	13.64	3.08368	0				2007-03-15	9.72625	3.53986	-3.4104	0
2007-03-16	21.2961	7.857	-1.56125	0				2007-03-16	19.8465	20.3095	4.56863	0.232444				2007-03-16	17.1058	4.73297	-4.47675	0.0727238
2007-03-17	19.5698	11.0795	-0.953949	0				2007-03-17	7.24482	12.9473	3.66479	0.562569				2007-03-17	17.8296	7.71439	-2.40436	0
2007-03-18	16.9811	9.8794	-1.51126	0.109395				2007-03-18	6.46818	1.48907	-4.39093	0.488762				2007-03-18	21.4201	16.7458	0.812897	0.0126922
2007-03-19	18.3923	7.47388	-0.135376	0.0493591				2007-03-19	18.8841	7.33847	-5.25693	0.0288167				2007-03-19	15.4466	16.8435	4.80759	0.0202132
2007-03-20	19.5977	7.87271	-0.18634	0.00633815				2007-03-20	18.578	13.7511	1.28876	0.0367726				2007-03-20	20.3613	22.053	7.47852	0
2007-03-21	13.9066	13.4246	2.02246	0.391704				2007-03-21	14.0436	8.9779	1.11273	0.0193513				2007-03-21	20.7682	21.6381	7.84692	0.0419622
2007-03-22	20.7166	6.87237	-1.37048	0.0109973				2007-03-22	12.7725	8.72754	0.4758	0				2007-03-22	11.4362	12.4142	4.25803	0.0678802
2007-03-23	19.628	6.67642	-2.06873	0.0269346				2007-03-23	19.2276	11.9347	1.53567	0.499337				2007-03-23	7.9527	7.10266	0.0369263	0.21881
2007-03-24	22.5527	5.86185	-2.14841	0				2007-03-24	20.4449	10.464	-0.1922	0.0182864				2007-03-24	13.4079	7.11121	-2.50256	0.157738
2007-03-25	23.1537	15.2309	-1.2258	0				2007-03-25	18.5583	14.0683	1.64127	0.0443168				2007-03-25	21.8738	19.009	3.02899	0
2007-03-26	21.0881	9.91836	-1.14581	0.0266697				2007-03-26	19.5137	12.5529	-0.705963	0.0807371				2007-03-26	21.6811	22.7086	7.25284	0.105308
2007-03-27	23.6889	9.32013	-1.02078	0				2007-03-27	11.4793	7.98819	-1.93839	0.226451				2007-03-27	11.0889	16.0867	6.18912	0.216566
2007-03-28	19.5	16.5141	1.90906	0.0366815				2007-03-28	21.0319	12.8587	-0.174164	0				2007-03-28	9.66906	13.7902	5.16995	1.02761
2007-03-29	19.1276	12.8535	2.17871	0.0419917				2007-03-29	22.6213	12.1528	-1.2706	0.038002				2007-03-29	17.9389	17.9601	6.1235	0.092622
2007-03-30	17.2997	16.8645	4.2435	1.09544				2007-03-30	22.6266	14.3773	2.47708	0				2007-03-30	10.8314	10.4287	3.23199	0.275496
2007-03-31	10.7618	13.2283	3.31897	0.0924698				2007-03-31	21.4973	14.5492	1.14896	0.0330628				2007-03-31	4.04719	6.19958	0.823334	1.75647
2007-04-01	22.7512	14.0398	2.91965	0.0449541				2007-04-01	23.1127	17.8999	2.36026	0				2007-04-01	19.8523	11.7288	1.92462	0.195417
2007-04-02	21.0763	12.3062	-0.0582275	0.121368				2007-04-02	23.0894	17.2755	3.14029	0.0363068				2007-04-02	17.3789	12.2708	2.51267	0.269367
2007-04-03	24.1577	18.7861	0.359009	0				2007-04-03	21.8885	20.4205	8.20529	0.150053				2007-04-03	22.1727	15.6023	3.56656	0.28551
2007-04-04	19.5563	19.5282	5.07965	0.203575				2007-04-04	19.014	21.8082	8.05225	0.18207				2007-04-04	11.9773	11.0023	3.24631	0.673665
2007-04-05	11.4576	3.45956	0.175995	1.78185				2007-04-05	12.1498	15.4712	1.94098	9.55205				2007-04-05	19.5273	11.4477	2.93417	0.119309
2007-04-06	24.1044	9.79007	0.0136414	0				2007-04-06	14.7186	8.85642	0.420563	0.244857				2007-04-06	18.4837	11.2277	2.39676	0.113614
2007-04-07	24.9055	15.8858	1.59888	0				2007-04-07	6.52438	6.36783	-1.89948	0.580856				2007-04-07	24.1664	14.7276	3.94705	0
2007-04-08	24.4612	19.2014	3.78137	0				2007-04-08	4.07907	0.453522	-6.65118	0.348273				2007-04-08	24.8416	20.6438	8.67557	0
2007-04-09	24.4943	17.4777	5.8562	0				2007-04-09	24.3626	8.52945	-3.1109	0				2007-04-09	24.7558	24.7824	12.3461	0.0275091
2007-04-10	18.02	17.9164	5.30655	0.143615				2007-04-10	24.9057	11.9163	-0.0168762	0.0439878				2007-04-10	22.4842	22.5594	11.0687	0.0647304
2007-04-11	22.1342	16.1429	1.73874	0				2007-04-11	23.9164	13.9684	0.751038	0				2007-04-11	16.327	20.0721	9.27374	0.690319
2007-04-12	25.0267	9.49304	-0.63562	0.0737477				2007-04-12	25.0534	15.3945	1.00296	0.010028				2007-04-12	12.23	13.3136	6.25305	2.75505
2007-04-13	26.7306	14.3278	-0.109314	0				2007-04-13	22.5749	15.3669	1.6008	0.0257606				2007-04-13	18.5856	16.0707	5.06833	0.0443315
2007-04-14	24.7842	21.3985	1.59351	0				2007-04-14	24.8192	21.4797	8.19571	0				2007-04-14	19.2252	17.5007	6.7858	0.0277241
2007-04-15	25.6454	21.8021	8.78946	0				2007-04-15	20.4194	22.0236	8.97662	0.0409516				2007-04-15	15.7927	17.9174	6.88522	0.0154789
2007-04-16	25.6945	22.5452	8.80426	0				2007-04-16	15.978	18.6929	9.29593	0.236803				2007-04-16	12.2428	14.2875	5.15897	1.06799
2007-04-17	26.0093	25.4932	10.6782	0				2007-04-17	25.7568	20.2333	5.95108	0				2007-04-17	9.87861	14.6872	6.3956	2.47627
2007-04-18	22.8613	21.4618	4.57706	0.00355947				2007-04-18	25.6187	22.6635	8.39096	0				2007-04-18	7.46494	12.9427	5.53256	2.76367
2007-04-19	22.307	17.882	4.51788	0				2007-04-19	23.3437	22.1632	8.61313	0				2007-04-19	12.3913	12.0838	5.0076	1.80635
2007-04-20	24.2446	12.3427	3.5567	0.0367426				2007-04-20	10.8205	19.9019	6.76834	0				2007-04-20	24.7641	12.886	5.1752	0.179178
2007-04-21	18.1685	14.391	4.55444	0.0762928				2007-04-21	25.1504	25.0623	9.13638	0.0833916				2007-04-21	20.4018	17.1544	7.37567	0.245133
2007-04-22	26.3159	17.0818	5.02078	0				2007-04-22	23.5847	26.259	5.24454	0.205866				2007-04-22	25.5968	15.4838	4.6431	0
2007-04-23	26.3534	20.7312	7.24439	0				2007-04-23	25.564	6.77414	1.19	0.0140239				2007-04-23	23.7481	15.0215	5.46439	0
2007-04-24	23.532	23.1888	8.84705	0.0989349				2007-04-24	26.9437	14.3303	4.48312	0				2007-04-24	19.6298	17.5987	8.22653	0.088876
2007-04-25	25.9767	25.4393	11.2396	0.0183172				2007-04-25	27.1011	21.6202	8.98959	0				2007-04-25	13.367	12.257	5.64014	0.491126
2007-04-26	25.9137	27.0221	12.668	0				2007-04-26	25.2644	24.7808	9.86331	0				2007-04-26	26.2254	17.6878	7.39822	0
2007-04-27	24.8446	27.055	13.7955	0.0639328				2007-04-27	22.4131	19.1603	8.13849	0				2007-04-27	26.4343	20.0985	8.69961	0
2007-04-28	21.7067	25.9234	14.8503	0.0281219				2007-04-28	21.1906	19.9543	9.31119	0				2007-04-28	26.4817	22.1447	11.3314	0.689579
2007-04-29	24.3671	25.7561	15.5057	0.272096				2007-04-29	24.4508	24.6105	13.2516	0				2007-04-29	26.2326	26.3955	13.5898	0.0239074
2007-04-30	21.4135	19.712	11.2428	0.199101				2007-04-30	25.9931	29.0448	15.7913	0				2007-04-30	16.5111	23.3799	9.29144	0.0641591
2007-05-01	29.3231	19.5923	3.5968	0.0152256				2007-05-01	17.5777	24.3969	11.5222	0.671471				2007-05-01	27.9366	14.7262	2.04654	0
2007-05-02	28.9146	18.8613	2.9093	0				2007-05-02	25.0962	19.9493	9.12909	0.0345949				2007-05-02	27.5787	14.0209	1.98087	0
2007-05-03	28.8851	17.6398	4.45563	0				2007-05-03	19.2133	21.7455	9.85642	0.138798				2007-05-03	26.3115	18.5308	6.57465	0.0340574
2007-05-04	19.5615	19.5704	8.79163	0.219937				2007-05-04	26.3314	21.4066	9.63992	0				2007-05-04	26.1711	22.3983	12.1023	0.0852231
2007-05-05	26.3752	21.9226	8.52167	0				2007-05-05	17.1953	17.5677	8.16034	0				2007-05-05	27.7857	24.3605	11.4698	0
2007-05-06	27.4306	23.7999	9.8089	0				2007-05-06	24.328	22.6083	11.6757	0				2007-05-06	27.5181	24.1318	10.0604	0
2007-05-07	27.3296	25.441	13.3611	0				2007-05-07	23.4392	25.7392	14.0767	0				2007-05-07	27.8951	25.24	12.4977	0
2007-05-08	28.3174	27.8302	15.3191	0.119104				2007-05-08	26.7079	24.6356	10.4818	0.286317				2007-05-08	26.5615	30.9928	18.4818	0
2007-05-09	26.0104	28.4902	14.3329	0.417374				2007-05-09	25.8385	18.9002	7.97452	0.272746				2007-05-09	17.9616	31.2511	18.1101	0.637286
2007-05-10	20.1236	18.8057	9.1597	0.281077				2007-05-10	17.643	19.4701	10.5511	0.195915				2007-05-10	18.5004	27.1338	18.2573	3.46437
2007-05-11	27.8374	14.9816	4.43985	0				2007-05-11	27.2973	25.0712	13.079	0.155249				2007-05-11	2.78663	18.0349	12.4787	7.80078
2007-05-12	25.6486	23.2147	8.81284	0.0959116				2007-05-12	18.9677	24.5244	14.3037	0				2007-05-12	26.7668	19.1569	11.1526	0.186968
2007-05-13	19.5687	24.0246	11.551	0.0881334				2007-05-13	21.0139	20.3291	11.4605	18.1318				2007-05-13	29.1199	20.4517	11.1555	0
2007-05-14	20.0683	23.5045	12.0039	0.107731				2007-05-14	21.9744	21.0416	10.2879	0.518377				2007-05-14	23.8865	21.2793	11.6986	0.0404552
2007-05-15	19.5925	27.6914	14.3687	0.278173				2007-05-15	23.9158	24.9138	14.5131	0.143444				2007-05-15	27.7231	20.6291	10.7472	0
2007-05-16	15.9081	26.7764	17.0554	9.66199				2007-05-16	25.4475	26.9246	14.5941	0				2007-05-16	28.4423	26.0929	14.4638	0.0388246
2007-05-17	20.9658	24.434	15.8433	0				2007-05-17	22.5734	24.7765	15.1795	0.0991888				2007-05-17	20.6731	22.8497	12.1252	0.0122487
2007-05-18	28.7172	27.5573	16.8779	0.0185789				2007-05-18	25.6419	24.5341	11.963	0.245762				2007-05-18	27.9566	25.6569	15.223	0.0882485
2007-05-19	20.674	25.6987	16.6141	0.00956333				2007-05-19	17.5472	16.8539	7.7608	0.262192				2007-05-19	28.2055	26.1324	11.8938	0
2007-05-20	6.11697	17.1524	11.5386	0.647999				2007-05-20	25.6941	19.2295	12.1802	0				2007-05-20	28.0862	14.8438	5.43368	0
2007-05-21	30.0992	19.338	7.74246	0				2007-05-21	23.4676	22.1219	11.9729	0.14748				2007-05-21	28.9179	20.4044	8.62595	0.0342524
2007-05-22	31.6673	24.2241	10.9284	0				2007-05-22	28.9723	27.7292	16.2	0.0945599				2007-05-22	28.6231	24.9983	14.8429	0.0171854
2007-05-23	32.0977	29.2211	15.4585	0				2007-05-23	22.1783	26.3269	17.2625	0.0949087				2007-05-23	26.7237	29.4852	18.0645	0
2007-05-24	30.1285	32.3786	18.4998	0				2007-05-24	25.0762	24.2275	16.5279	0.460615				2007-05-24	25.1657	27.9869	17.035	0
2007-05-25	24.4065	30.4724	17.9168	0				2007-05-25	7.30272	16.5845	9.77695	1.83608				2007-05-25	27.9441	27.3291	17.627	0.0808238
2007-05-26	24.1677	29.2503	18.8143	1.69872				2007-05-26	29.4804	22.8904	13.0397	0				2007-05-26	28.2931	28.8245	18.1567	0
2007-05-27	17.899	22.9606	15.444	3.09843				2007-05-27	30.1091	24.6708	14.8931	0				2007-05-27	27.2282	29.1855	18.7236	0.171053
2007-05-28	28.363	29.9471	17.1643	0.408314				2007-05-28	28.0134	28.0127	15.757	0.0418829				2007-05-28	25.4993	29.3153	18.2059	0.594441
2007-05-29	23.9789	27.9222	19.7427	0.0270639				2007-05-29	27.9557	25.5428	14.9503	0				2007-05-29	25.2544	28.3653	19.6165	0.501524
2007-05-30	21.0705	24.7401	15.6401	0.147515				2007-05-30	24.5122	29.4653	19.1654	0				2007-05-30	21.617	27.4066	19.7246	3.37755
2007-05-31	24.3295	27.035	16.9117	3.10587				2007-05-31	19.0792	29.1732	18.2272	0.225167				2007-05-31	17.6201	26.7486	17.8048	6.32838
2007-06-01	11.8655	18.0499	13.3423	3.70098				2007-06-01	22.9524	30.0847	19.291	0				2007-06-01	29.8248	30.3244	17.1212	0.246956
2007-06-02	25.6278	26.4748	15.7638	0				2007-06-02	19.8859	24.4882	14.6095	1.31959				2007-06-02	28.9602	23.5329	11.847	0
2007-06-03	26.3483	28.2094	17.549	3.18843				2007-06-03	29.7822	25.9158	16.1648	0.0302782				2007-06-03	30.0111	21.5168	11.8892	0
2007-06-04	16.4375	23.5581	17.7083	2.54268				2007-06-04	31.2286	27.6922	17.7649	0				2007-06-04	23.3079	26.9496	16.7596	0.832735
2007-06-05	28.6803	31.5713	17.3243	0				2007-06-05	25.3518	29.6027	18.0583	0.229972				2007-06-05	27.5173	23.2066	12.3586	0
2007-06-06	25.8097	21.5363	10.8895	0.0970771				2007-06-06	24.8827	28.2614	18.6995	0.0829825				2007-06-06	26.6589	24.8542	16.2082	0.112923
2007-06-07	31.1409	19.2218	10.2621	0				2007-06-07	28.2144	31.4622	20.4942	0				2007-06-07	27.2718	27.5499	15.9876	0.0406949
2007-06-08	30.7242	24.0498	12.678	0				2007-06-08	30.1169	27.697	18.1922	0.173001				2007-06-08	28.1313	28.0921	18.8373	0
2007-06-09	27.9018	27.651	16.3649	0				2007-06-09	25.9224	29.5681	19.1282	0				2007-06-09	28.0181	28.708	18.3635	0
2007-06-10	23.5407	28.434	18.9998	3.32571				2007-06-10	20.7203	27.2087	18.0785	0.140495				2007-06-10	30.0425	29.8093	20.5078	0.0739892
2007-06-11	18.4273	21.1203	14.7227	0.744549				2007-06-11	30.4201	26.0539	17.406	0				2007-06-11	28.1106	31.7052	21.8	0.408476
2007-06-12	29.0881	25.4901	15.5004	0.0786842				2007-06-12	23.4661	28.9817	19.204	0				2007-06-12	26.5663	28.8326	15.918	0
2007-06-13	27.4315	28.6676	17.8545	0.107172				2007-06-13	29.7852	31.6629	19.8293	0				2007-06-13	29.885	28.8448	18.3691	0
2007-06-14	20.3548	26.0044	18.585	0.326746				2007-06-14	23.5129	30.2063	20.6338	0.161285				2007-06-14	28.5316	30.3673	16.4505	0
2007-06-15	24.2969	23.1773	17.2623	0.42217				2007-06-15	17.5868	28.3201	19.1693	0				2007-06-15	28.1301	30.5857	18.3108	0
2007-06-16	11.6067	18.779	16.7084	0.299565				2007-06-16	23.4851	29.5556	19.0022	0.763432				2007-06-16	28.275	33.442	21.486	0
2007-06-17	27.5267	24.0397	15.4215	0.229999				2007-06-17	13.1287	22.4813	16.8806	1.35378				2007-06-17	24.2399	32.4778	21.622	0.290203
2007-06-18	29.6495	27.8375	16.9226	0				2007-06-18	26.1577	25.4294	17.3929	0.767045				2007-06-18	19.2096	29.4972	22.2563	1.45119
2007-06-19	26.0749	30.3987	19.2478	0.647266				2007-06-19	26.3636	28.7077	18.3296	0.230207				2007-06-19	8.39452	22.5583	17.1313	1.13134
2007-06-20	11.5035	24.2049	20.082	3.01506				2007-06-20	28.0933	32.208	19.1891	0.246897				2007-06-20	21.8861	24.9727	15.5642	0
2007-06-21	13.5398	24.2023	19.6446	2.54751				2007-06-21	30.1871	32.491	20.9343	0.342606				2007-06-21	24.5841	26.4078	18.5636	0
2007-06-22	16.3995	24.3613	17.9666	1.62672				2007-06-22	25.477	33.4039	22.5122	0.101562				2007-06-22	15.7074	24.8621	18.308	0.657601
2007-06-23	22.9491	24.4618	16.4721	0				2007-06-23	16.9282	30.5363	16.692	0.630909				2007-06-23	18.4709	28.6734	18.8422	0.128187
2007-06-24	28.071	25.8359	17.6368	0				2007-06-24	26.7096	25.2799	15.928	0.523512				2007-06-24	29.317	31.2855	18.624	0
2007-06-25	23.1374	27.4507	19.7231	0.863617				2007-06-25	29.1811	31.7918	19.6289	0				2007-06-25	30.2536	31.9678	20.1705	0
2007-06-26	23.3222	28.6287	19.5477	0.382389				2007-06-26	18.7091	29.1292	18.3294	0				2007-06-26	29.5612	35.2552	19.9752	0
2007-06-27	27.9363	30.8308	20.2839	0.0537304				2007-06-27	29.0922	33.5828	22.0486	0				2007-06-27	27.777	31.8592	22.3187	0.095465
2007-06-28	13.5891	26.086	20.5219	0.75697				2007-06-28	24.6549	33.2812	23.2379	0.179612				2007-06-28	26.4625	32.8294	23.4394	4.84467
2007-06-29	28.2504	29.1852	20.8995	0.057438				2007-06-29	23.3648	34.6871	22.4457	0.247322				2007-06-29	25.7804	30.978	21.9991	1.19364
2007-06-30	27.9521	30.9391	22.3846	0.0742251				2007-06-30	12.1488	30.735	20.5437	0.122456				2007-06-30	26.3543	30.5025	21.1888	0.0947261
2007-07-01	15.8304	26.4392	20.149	0.940548				2007-07-01	28.8667	34.4455	22.675	0.10982				2007-07-01	18.0916	29.3137	20.5078	0.892591
2007-07-02	17.2184	26.619	19.0832	1.30864				2007-07-02	28.5977	36.5803	23.7972	0				2007-07-02	11.6774	22.9673	15.4168	0.709
2007-07-03	24.9432	28.413	20.7271	0.122312				2007-07-03	17.8238	30.7386	18.9984	1.55122				2007-07-03	9.50132	18.9147	13.9356	5.00871
2007-07-04	13.2618	24.1107	16.8755	1.1733				2007-07-04	10.3658	23.6842	17.1732	7.47678				2007-07-04	19.9221	23.357	15.1921	0.50054
2007-07-05	28.9264	29.4043	17.3484	0.0391126				2007-07-05	29.2955	32.4256	21.1633	0				2007-07-05	29.5972	27.2605	16.0297	0
2007-07-06	28.8884	31.2274	17.513	0				2007-07-06	27.1983	33.6287	23.0807	0				2007-07-06	27.8165	29.3827	19.3135	0
2007-07-07	27.8987	30.7772	19.3267	0				2007-07-07	26.2335	31.0066	23.4003	0				2007-07-07	23.4293	27.5684	16.7534	0.0828052
2007-07-08	23.5509	32.1005	21.9036	0.141137				2007-07-08	22.0056	33.6245	21.5281	2.5746				2007-07-08	27.0195	26.8151	15.589	0
2007-07-09	23.7145	31.0377	21.7339	0.0836013				2007-07-09	11.2521	26.6049	19.5396	13.7476				2007-07-09	28.777	27.7929	14.7018	0
2007-07-10	14.4098	25.3998	19.8675	1.39297				2007-07-10	9.05475	22.3288	16.1538	4.67416				2007-07-10	29.6626	30.8982	20.0666	0
2007-07-11	25.1507	27.077	18.1282	0.230352				2007-07-11	27.01	27.5002	17.6305	0.44424				2007-07-11	27.6084	33.021	21.1753	0.100638
2007-07-12	24.9684	29.2437	20.1565	2.99221				2007-07-12	29.0482	31.6079	16.6738	0				2007-07-12	27.8226	33.5171	21.3684	0.175367
2007-07-13	21.9602	27.6957	18.8255	2.23715				2007-07-13	29.403	32.6988	18.9416	0				2007-07-13	25.3972	32.2537	20.8109	7.37363
2007-07-14	25.8248	29.6388	18.1886	0.914377				2007-07-14	23.7851	32.071	19.9895	0				2007-07-14	10.037	23.49	17.7082	2.67603
2007-07-15	26.661	32.1086	20.7166	0.0637267				2007-07-15	18.3852	29.6425	20.8869	0				2007-07-15	28.3002	28.027	17.6154	0
2007-07-16	17.3809	30.6439	22.9872	0.560739				2007-07-16	20.5751	29.5281	22.051	0.832458				2007-07-16	22.9189	27.2283	18.2526	0
2007-07-17	22.0849	31.626	20.5699	0.0796627				2007-07-17	21.0737	29.225	20.2952	0				2007-07-17	28.051	30.9714	19.3028	0.0511367
2007-07-18	26.9082	31.2888	18.0217	0.175038				2007-07-18	21.7341	29.4289	19.7822	0.596339				2007-07-18	27.6218	32.2215	20.7763	0
2007-07-19	25.7218	26.1062	18.6249	0.224877				2007-07-19	15.9896	24.5527	18.2721	0.963872				2007-07-19	24.488	31.3711	22.9388	0.042491
2007-07-20	22.1644	24.0667	17.4691	0				2007-07-20	16.1748	23.86	16.5394	4.03247				2007-07-20	26.9357	34.1021	23.4522	0.340943
2007-07-21	24.3787	25.3094	16.6759	0.931301				2007-07-21	20.9456	25.1019	16.6422	1.37537				2007-07-21	22.1171	32.0759	22.5323	0.168707
2007-07-22	24.3149	25.3987	18.5266	0.249674				2007-07-22	26.9299	28.9439	19.0779	0.907413				2007-07-22	11.4309	26.6555	20.0743	2.80699
2007-07-23	25.5719	28.066	19.6924	0.258087				2007-07-23	28.1193	32.7517	21.2674	0.214819				2007-07-23	28.2179	33.4795	21.2635	0.0524442
2007-07-24	26.6387	28.6294	19.8367	0.140726				2007-07-24	27.6629	33.7285	22.4311	0.233399				2007-07-24	26.0897	32.4143	22.3218	0.15707
2007-07-25	26.5884	28.3302	20.5675	0.0759868				2007-07-25	27.9288	35.8539	25.3487	0.127509				2007-07-25	21.0821	28.798	21.1514	0.620733
2007-07-26	25.863	29.1927	20.0625	0.0466277				2007-07-26	21.4341	35.5259	25.6079	0.17591				2007-07-26	18.0601	25.9216	18.2412	0.278072
2007-07-27	20.2197	27.6098	21.3473	0.268496				2007-07-27	13.8003	32.1842	23.4686	5.093				2007-07-27	25.9325	30.7909	19.8639	0
2007-07-28	9.48309	21.7069	16.687	4.2233				2007-07-28	16.8201	30.6269	23.0979	1.56602				2007-07-28	22.5985	31.28	21.4548	0
2007-07-29	26.8544	27.1953	16.8696	0.237413				2007-07-29	19.749	30.896	22.4235	7.68164				2007-07-29	21.7117	32.3516	20.5903	0.0548853
2007-07-30	19.2249	24.3975	17.2528	0.679196				2007-07-30	21.0112	23.2226	19.6699	12.218				2007-07-30	26.9171	39.13	26.3769	0
2007-07-31	23.1978	23.5078	16.2822	0.773507				2007-07-31	19.0441	24.2732	17.5269	12.8931				2007-07-31	20.1954	35.3411	20.4208	0.299186
2007-08-01	24.7329	26.5615	17.1363	0				2007-08-01	12.9418	24.434	15.1151	9.13515				2007-08-01	27.9235	35.7851	18.8458	0
2007-08-02	22.8889	27.5334	18.7173	0.31123				2007-08-02	27.1333	28.4816	17.9577	2.80448				2007-08-02	28.4614	35.2317	21.6636	0
2007-08-03	18.2979	25.9633	21.5435	0.684509				2007-08-03	27.6867	29.3338	16.0652	0.438848				2007-08-03	25.6828	35.5525	23.3674	0
2007-08-04	16.8936	25.2149	20.6841	2.01023				2007-08-04	26.1883	29.0533	18.5284	0				2007-08-04	27.0982	36.4215	23.8736	0.0459089
2007-08-05	21.272	26.8162	18.8309	0.308725				2007-08-05	20.7302	29.2029	17.1743	0				2007-08-05	26.1046	35.3694	22.9152	0.0909532
2007-08-06	24.8219	28.9416	19.9641	0.230909				2007-08-06	21.8979	30.3464	20.2636	0.56398				2007-08-06	26.3041	36.8369	23.8203	0.163015
2007-08-07	22.6715	29.3125	22.3206	0.0363956				2007-08-07	11.5449	25.4741	18.182	1.8825				2007-08-07	19.9739	33.2234	23.4218	0.651217
2007-08-08	18.2811	29.6586	20.6957	1.69675				2007-08-08	25.3244	28.4038	15.56	0.0731597				2007-08-08	26.0491	33.3593	21.1823	0.0265492
2007-08-09	16.8215	25.04	17.2243	0.25053				2007-08-09	23.772	29.4439	15.191	0.0349839				2007-08-09	27.587	37.8022	23.6653	0.0537034
2007-08-10	26.6521	27.0439	16.1091	0				2007-08-10	24.6925	30.331	16.8745	0				2007-08-10	26.0491	37.1055	24.6982	0.548124
2007-08-11	24.7027	27.6911	17.3668	0.125156				2007-08-11	22.4149	29.6926	16.7469	0.217407				2007-08-11	24.9483	38.6874	22.9632	0.148019
2007-08-12	24.9931	28.5151	18.3272	0.0661034				2007-08-12	20.4768	28.5977	15.479	0.0901883				2007-08-12	27.4888	38.3377	20.6857	0
2007-08-13	25.3948	28.0723	18.485	0.122154				2007-08-13	22.1185	26.8785	16.1896	0.153743				2007-08-13	26.7446	36.0923	23.9264	0
2007-08-14	25.265	29.3687	18.9252	2.02439				2007-08-14	26.6974	31.0511	17.1809	0				2007-08-14	12.4023	30.8132	18.3481	0
2007-08-15	20.7338	24.2572	19.5936	3.98204				2007-08-15	21.5705	29.7659	19.7317	0				2007-08-15	25.6289	33.9176	21.6144	0
2007-08-16	22.5415	27.4164	19.2646	0.802383				2007-08-16	20.5126	31.7842	20.6163	0.414635				2007-08-16	13.4386	27.1868	21.5097	3.48181
2007-08-17	23.2547	28.3723	19.0469	0.124008				2007-08-17	19.4288	28.0556	17.0119	0.20747				2007-08-17	3.46882	24.2311	18.4728	12.8476
2007-08-18	23.938	29.7585	19.3843	0.0186973				2007-08-18	25.7727	29.5974	19.886	0.115216				2007-08-18	8.49854	22.7057	15.9085	1.32821
2007-08-19	18.8214	27.1436	20.792	0.028716				2007-08-19	23.8815	29.5916	19.7517	0				2007-08-19	18.2965	24.4312	17.2483	0.242331
2007-08-20	23.1308	30.1546	21.1791	0.108088				2007-08-20	21.3509	31.3214	20.3851	0.214571				2007-08-20	19.1623	25.474	17.986	1.97235
2007-08-21	19.0769	29.8139	21.4295	0.562973				2007-08-21	16.7483	27.989	18.7105	0.191278				2007-08-21	20.9096	25.4085	14.67	0.0445798
2007-08-22	20.6406	29.8418	17.1118	3.2012				2007-08-22	25.8951	31.5216	18.9274	0.035278				2007-08-22	23.3986	23.4708	15.3538	0
2007-08-23	10.2226	20.4099	14.1842	3.87459				2007-08-23	23.7931	31.6155	20.4271	0				2007-08-23	15.0337	22.669	15.472	5.59327
2007-08-24	26.1877	24.9505	13.1409	0				2007-08-24	17.214	33.0009	21.6198	0.384806				2007-08-24	12.9053	20.0249	14.0015	2.21121
2007-08-25	24.5314	25.9317	14.1359	0.136607				2007-08-25	20.8397	31.4115	19.1487	0.26875				2007-08-25	16.6006	19.9154	13.1653	1.72524
2007-08-26	25.28	30.3704	16.5753	0				2007-08-26	16.6664	29.3342	18.1807	0.139613				2007-08-26	21.6187	21.7177	14.2758	2.15177
2007-08-27	22.4202	34.9585	19.1748	0.425869				2007-08-27	23.915	32.805	20.0344	0				2007-08-27	21.419	21.5497	14.8412	0.716721
2007-08-28	13.3528	24.546	18.885	4.33345				2007-08-28	23.1812	31.2498	20.8441	0.056427				2007-08-28	20.1634	22.5442	15.352	0.438464
2007-08-29	15.3618	23.7751	14.5736	27.5649				2007-08-29	12.6141	28.3995	20.4975	3.05137				2007-08-29	22.745	25.5389	16.2865	0.131572
2007-08-30	14.6239	21.3345	15.4237	0.786902				2007-08-30	16.3835	25.0522	17.4606	2.65911				2007-08-30	19.1865	26.038	15.9215	0.163535
2007-08-31	20.9867	25.0165	15.457	2.09864				2007-08-31	12.237	20.3535	12.7957	2.3985				2007-08-31	23.5596	27.4277	15.802	0.492872
2007-09-01	8.65643	17.1469	11.1553	3.34398				2007-09-01	21.1068	23.6625	12.5444	0				2007-09-01	23.6086	26.8236	15.0723	0.381883
2007-09-02	21.3987	21.9464	11.9343	0				2007-09-02	23.8809	25.7104	13.2939	0				2007-09-02	22.403	25.4087	14.9968	0.43399
2007-09-03	19.6221	24.9276	13.7231	0.159176				2007-09-03	24.5572	29.5028	17.8092	0				2007-09-03	22.141	25.0706	15.7702	0.615987
2007-09-04	21.5272	26.3018	15.6023	0.0732513				2007-09-04	21.4584	30.2937	16.7811	0				2007-09-04	15.8924	22.9733	14.5525	0
2007-09-05	11.837	24.6387	18.4166	0.967657				2007-09-05	23.4973	30.6979	17.2299	0				2007-09-05	13.9018	21.445	14.879	1.40465
2007-09-06	5.93197	21.4217	14.4907	1.38083				2007-09-06	18.6313	30.6632	18.1053	0				2007-09-06	22.2726	25.8542	13.8861	0.691867
2007-09-07	18.9311	24.8578	14.5455	0.124564				2007-09-07	17.9947	32.7344	19.5993	3.82558				2007-09-07	20.7838	20.9464	9.27328	0.110599
2007-09-08	21.8585	25.9607	15.7736	0.174197				2007-09-08	3.78524	13.8767	11.6484	16.4392				2007-09-08	24.2344	25.0788	13.1171	0
2007-09-09	18.9517	25.6286	15.4476	1.36109				2007-09-09	17.9606	17.8233	9.20776	0.247977				2007-09-09	21.0005	27.0992	16.3017	0.692114
2007-09-10	12.1629	21.8795	13.4938	0.495351				2007-09-10	14.0337	17.8243	7.91467	0.243594				2007-09-10	15.2734	23.8488	14.5217	0.386318
2007-09-11	21.1682	24.5665	13.8003	0.00433927				2007-09-11	22.2094	20.7295	9.56659	0				2007-09-11	12.1425	18.4483	11.526	0.661592
2007-09-12	19.0697	23.037	12.9898	0				2007-09-12	22.275	19.4732	8.3522	0				2007-09-12	23.4315	25.7476	10.1703	0
2007-09-13	16.6427	22.0271	12.7759	0				2007-09-13	19.5207	22.2964	10.5486	0.0349846				2007-09-13	22.3409	25.061	11.2343	0
2007-09-14	16.1042	24.6859	13.627	0.195991				2007-09-14	16.0616	23.9902	11.074	0.0698246				2007-09-14	22.7045	27.1238	13.7177	0.0443128
2007-09-15	22.0441	27.7142	14.5391	0				2007-09-15	15.5342	24.0221	12.3349	0.070318				2007-09-15	20.3213	26.8879	14.5314	0.074109
2007-09-16	21.3583	27.9973	15.1494	0				2007-09-16	14.0405	24.854	13.3734	0.125751				2007-09-16	20.4556	29.1793	15.7574	0.02496
2007-09-17	20.8663	29.1724	15.756	0				2007-09-17	14.2067	25.8477	14.422	0.117346				2007-09-17	20.7786	30.2451	15.7633	0.0553865
2007-09-18	18.2921	26.9837	13.4228	0.0351305				2007-09-18	17.0741	25.6906	14.2308	1.42944				2007-09-18	18.7321	28.527	15.68	1.33616
2007-09-19	19.8799	28.0335	14.1961	0				2007-09-19	11.2135	23.5738	13.7979	8.19723				2007-09-19	13.8225	24.8987	8.90826	0
2007-09-20	9.26233	17.8964	12.3323	0.219654				2007-09-20	16.0272	20.9946	7.9866	0.548494				2007-09-20	21.7176	23.8355	11.278	0
2007-09-21	20.9668	22.1417	11.6847	0				2007-09-21	19.9283	18.103	7.3067	0				2007-09-21	9.14803	21.823	11.2546	1.63806
2007-09-22	16.4531	24.0999	11.2896	0.0726741				2007-09-22	17.7317	21.2373	9.85196	0				2007-09-22	15.3939	26.8183	15.4655	0.0588118
2007-09-23	11.4421	20.8642	13.12	0.32954				2007-09-23	16.0297	22.3175	11.6584	0.112084				2007-09-23	8.51223	21.1625	12.5598	0.897518
2007-09-24	17.3928	26.8049	13.9754	0.507227				2007-09-24	14.1054	21.281	10.18	0.756855				2007-09-24	7.20133	21.3148	11.9814	2.19641
2007-09-25	17.3274	17.7209	5.75702	0				2007-09-25	9.05429	20.9273	9.18796	2.16669				2007-09-25	9.60863	25.5851	14.4507	1.77361
2007-09-26	17.3537	17.3747	5.40732	0.0615409				2007-09-26	19.3074	21.6522	7.86038	0.228882				2007-09-26	14.4999	21.2614	9.39487	0
2007-09-27	14.996	18.4158	6.30014	0.0273017				2007-09-27	19.4921	19.7871	5.74609	0.0707141				2007-09-27	16.5664	21.1747	10.4065	0.0311804
2007-09-28	19.7859	20.5041	6.65515	0				2007-09-28	19.9087	20.5514	8.80368	0.0931506				2007-09-28	12.2138	22.1288	11.0789	0.0414742
2007-09-29	13.4822	21.2778	9.73148	0.561937				2007-09-29	18.151	25.8252	12.2628	0				2007-09-29	7.49543	16.9897	8.94635	0.969429
2007-09-30	9.39342	18.1153	10.6701	0.0647248				2007-09-30	7.75867	19.7231	10.484	4.34543				2007-09-30	4.76647	13.1083	4.7673	4.32231
2007-10-01	16.4964	21.2014	10.978	0.0203448				2007-10-01	10.8811	20.8206	6.77753	0.0890959				2007-10-01	8.71363	13.1383	4.88364	0.994339
2007-10-02	10.8486	23.2747	7.6409	0.194608				2007-10-02	16.218	21.6094	6.0618	0.152908				2007-10-02	8.12719	16.3184	6.28976	0.145418
2007-10-03	14.1363	20.1908	6.82758	0.391489				2007-10-03	18.2593	23.2091	10.4724	0.0935722				2007-10-03	9.31023	16.5096	7.58609	0.911989
2007-10-04	11.9973	19.3502	9.02905	0.140304				2007-10-04	6.37476	11.7421	5.59073	4.36841				2007-10-04	14.5722	16.4922	5.91702	0.473054
2007-10-05	18.4119	19.6745	8.24985	0				2007-10-05	14.7538	12.5401	2.51926	0.396147				2007-10-05	10.4299	15.269	4.64102	0.0172232
2007-10-06	18.1062	22.7477	9.01172	0				2007-10-06	12.8957	13.4139	1.48135	0.0903156				2007-10-06	10.4664	18.1635	6.48126	0
2007-10-07	19.168	27.1383	9.74686	0				2007-10-07	17.946	13.3509	1.44632	0				2007-10-07	12.419	19.0067	7.56216	0.236428
2007-10-08	18.3883	28.5496	13.5625	0				2007-10-08	17.0698	19.9073	3.64868	0.0407336				2007-10-08	9.12563	15.7584	5.78061	0.620798
2007-10-09	15.8374	26.8244	14.6469	0.0444196				2007-10-09	17.0049	22.3613	7.5708	0.286847				2007-10-09	15.4091	21.0111	7.85007	0
2007-10-10	4.46111	15.4362	1.34277	0.195894				2007-10-10	15.3639	19.141	4.15482	0.260589				2007-10-10	12.1014	15.6492	8.49027	0.0826844
2007-10-11	11.2115	9.02869	3.62439	0.0507537				2007-10-11	16.2057	18.2332	7.55661	0.346199				2007-10-11	11.9025	15.8285	6.89374	0.575064
2007-10-12	16.0774	16.9852	3.40949	0.336718				2007-10-12	14.8665	19.7287	2.54898	0.276797				2007-10-12	13.361	19.0607	8.22757	0.0868238
2007-10-13	8.31342	8.86121	0.731354	1.25728				2007-10-13	17.5843	14.5732	-1.97552	0				2007-10-13	14.1075	19.6104	7.32706	0.167405
2007-10-14	16.2486	19.275	2.36752	0.0221364				2007-10-14	16.807	18.8256	4.76663	0				2007-10-14	15.1984	18.2668	6.98318	0.0495767
2007-10-15	13.4394	22.2727	7.74793	3.61013				2007-10-15	15.719	21.7122	7.6684	0				2007-10-15	14.3867	18.0777	9.1044	0.320329
2007-10-16	4.72932	14.0443	6.03479	2.09767				2007-10-16	15.4736	19.936	8.79456	0				2007-10-16	13.0669	17.0986	2.69434	0.345941
2007-10-17	7.96558	13.3899	5.86151	3.48129				2007-10-17	15.3501	20.6084	7.45261	0.117231				2007-10-17	16.6384	19.3095	4.71378	0
2007-10-18	6.64109	11.1342	4.03952	0.369437				2007-10-18	12.5653	22.4116	10.8015	0.318836				2007-10-18	15.93	19.1309	4.93243	0.0722842
2007-10-19	14.4783	15.4463	3.39987	0				2007-10-19	12.1447	17.7518	8.0434	0.162327				2007-10-19	13.8042	13.1178	0.616272	0
2007-10-20	15.604	15.6231	1.16248	0				2007-10-20	14.1195	20.1104	4.54187	0				2007-10-20	16.0045	16.3224	-0.716888	0
2007-10-21	15.8311	13.787	-0.0497437	0				2007-10-21	15.5737	19.4461	4.65888	0				2007-10-21	15.8425	18.4243	0.0817566	0
2007-10-22	16.1728	16.0149	-0.865601	0.161504				2007-10-22	15.0971	21.0538	6.04996	0				2007-10-22	15.4119	18.1808	0.486084	0
2007-10-23	11.0582	20.0226	7.13	0.236129				2007-10-23	13.7677	17.0634	4.45166	0				2007-10-23	15.9453	17.8281	-1.39212	0
2007-10-24	14.9634	16.8972	5.47968	0				2007-10-24	15.0608	18.5986	5.74405	0				2007-10-24	15.2268	18.5688	2.39163	0
2007-10-25	12.2916	15.6146	2.28082	0.524798				2007-10-25	3.45516	8.04172	-3.37585	4.9997				2007-10-25	14.7635	18.5915	2.13944	0.0393213
2007-10-26	12.382	11.386	0.279053	0.0527636				2007-10-26	14.9914	4.41373	-8.06616	0				2007-10-26	13.5295	13.9203	1.31769	0.0402749
2007-10-27	10.7608	13.8811	2.03159	0.038879				2007-10-27	15.1001	5.94885	-4.53964	0				2007-10-27	12.3995	14.3686	1.44443	0.0435454
2007-10-28	8.86623	14.3802	2.70547	0.55247				2007-10-28	14.6235	5.3053	-5.78861	0				2007-10-28	10.1724	12.4924	1.65204	4.02004
2007-10-29	10.8047	13.4441	1.9939	0.347421				2007-10-29	12.6301	11.5801	-5.19748	0				2007-10-29	9.09414	9.52615	-2.50299	0.306476
2007-10-30	10.0254	11.7184	-0.629791	0.545968				2007-10-30	13.2204	9.58478	-0.974121	0				2007-10-30	11.2922	10.0921	-0.839111	0.307922
2007-10-31	15.2109	8.61038	-1.84851	0				2007-10-31	10.492	11.4599	-0.486542	0.380818				2007-10-31	11.3735	10.3175	-1.03628	0.195306
2007-11-01	14.1211	13.5569	-1.30609	0				2007-11-01	11.5929	10.0947	-0.427612	0.140641				2007-11-01	9.99512	10.3113	0.326385	0.46363
2007-11-02	13.7473	18.2497	-0.38855	0				2007-11-02	12.8758	18.2573	3.71945	0				2007-11-02	12.6651	11.7745	-2.15549	0.0195928
2007-11-03	13.4693	18.0356	2.53049	0.00326916				2007-11-03	10.169	16.3503	5.54275	0.434179				2007-11-03	13.7348	11.6877	-1.39053	0.0120597
2007-11-04	9.96402	11.7531	1.47263	0.0081875				2007-11-04	6.6679	13.2676	2.55633	0.696478				2007-11-04	10.8334	11.7514	0.380524	0.00986446
2007-11-05	7.51884	12.8055	3.37805	0.0861802				2007-11-05	10.6547	15.0158	3.3753	0.0959284				2007-11-05	13.3531	12.3607	1.36548	0
2007-11-06	7.92472	14.693	1.99844	0.925485				2007-11-06	5.2015	9.73425	0.363678	2.91391				2007-11-06	12.0572	13.9399	-0.164398	0
2007-11-07	2.83473	2.87628	-4.13135	2.01003				2007-11-07	3.04811	6.63852	-1.54605	0.432158				2007-11-07	12.68	6.27573	-4.40527	0.0168737
2007-11-08	6.74855	0.294556	-4.78268	0.133033				2007-11-08	13.1015	9.82385	-1.08038	0				2007-11-08	11.8226	4.58493	-5.45343	0
2007-11-09	6.3241	0.18747	-6.46231	2.12078				2007-11-09	11.808	13.1125	-1.43274	0				2007-11-09	13.6341	8.59308	-2.02408	0
2007-11-10	9.70146	3.22492	-3.58408	0				2007-11-10	11.1283	9.53577	1.24237	0				2007-11-10	12.9111	9.19376	-1.81552	0
2007-11-11	11.7346	5.06766	-6.12201	0				2007-11-11	8.97118	10.7852	0.830872	0.0424662				2007-11-11	12.123	8.64218	-2.1113	0
2007-11-12	12.0439	4.37537	-8.23419	0				2007-11-12	11.9294	4.42191	-2.75436	0				2007-11-12	9.82682	9.81738	-0.723328	0.0243556
2007-11-13	12.2979	5.86502	-2.42624	0.010344				2007-11-13	4.30848	7.24008	-2.11447	0				2007-11-13	8.01596	11.0217	-0.433258	0.0199626
2007-11-14	5.24511	7.32935	1.05914	0.0396287				2007-11-14	11.0725	12.7103	0.38916	0				2007-11-14	11.7722	8.7186	-0.966919	0
2007-11-15	8.82784	15.0418	2.08758	0.0363702				2007-11-15	11.2546	13.1889	0.768616	0				2007-11-15	10.3371	7.59579	-1.60898	0
2007-11-16	6.36742	11.8637	0.59613	0.514409				2007-11-16	11.4125	9.26468	-7.70978	1.06583				2007-11-16	11.6479	9.91367	-1.37448	0.0112319
2007-11-17	10.3814	13.5594	0.408295	0.203659				2007-11-17	11.5144	-4.06339	-10.0469	0				2007-11-17	11.294	10.0968	-1.70138	0
2007-11-18	7.55498	7.15768	-0.0733948	0.0825489				2007-11-18	11.5342	4.03342	-6.69223	0				2007-11-18	10.7272	7.26071	-2.40228	0.0917739
2007-11-19	10.6723	11.0773	-0.146759	0.00849374				2007-11-19	10.1324	4.40488	-2.82413	0.013239				2007-11-19	7.60716	4.59717	-3.67014	0.215869
2007-11-20	10.4521	15.6031	-0.382935	0				2007-11-20	11.0048	3.20078	-4.73032	0				2007-11-20	8.82594	3.63141	-3.76431	0
2007-11-21	8.81695	9.29599	0.320801	0.0122507				2007-11-21	8.57358	8.54779	-2.41141	0				2007-11-21	11.4698	7.69321	-2.01303	0
2007-11-22	7.5991	10.6458	-1.09766	0.145616				2007-11-22	8.18324	-0.37973	-7.56509	0.162597				2007-11-22	6.86201	10.5425	1.16193	0.0162959
2007-11-23	10.118	8.09085	-1.8772	0				2007-11-23	11.2519	0.795624	-9.11792	0				2007-11-23	9.36798	8.65573	-0.631683	0.0921509
2007-11-24	10.6833	12.2212	-2.49442	0				2007-11-24	11.0319	1.86758	-6.19961	0				2007-11-24	8.99228	6.36456	-2.39768	0.011749
2007-11-25	9.96954	9.9779	-1.75794	0				2007-11-25	10.114	4.74512	-5.49744	0				2007-11-25	9.38758	2.60086	-3.77307	0
2007-11-26	10.5308	9.66818	-1.62857	0				2007-11-26	10.0501	6.26944	-3.72031	0				2007-11-26	10.4677	6.89102	-2.63001	0
2007-11-27	10.5419	10.5464	-2.5275	0				2007-11-27	10.4691	8.49152	-4.63913	0				2007-11-27	10.6103	6.681	-2.30435	0
2007-11-28	9.2382	11.7987	-5.26211	0				2007-11-28	8.58789	10.4904	-1.79349	0				2007-11-28	8.78886	6.94076	-5.44476	0.249077
2007-11-29	9.39049	0.040741	-12.2316	0				2007-11-29	9.85364	12.0326	-2.87222	0				2007-11-29	6.47504	-2.72516	-9.97455	0
2007-11-30	10.3414	-5.61221	-14.6719	0				2007-11-30	10.1165	8.24655	0.10379	0.1658				2007-11-30	10.2999	3.41772	-7.56583	0
2007-12-01	7.30727	-0.742188	-10.7972	0.0332827				2007-12-01	4.57352	1.83221	-4.74081	0.0899415				2007-12-01	10.5681	4.50281	-4.27017	0
2007-12-02	7.83819	1.41513	-8.25058	0				2007-12-02	2.8289	-0.720734	-9.01706	0.194905				2007-12-02	10.0879	3.15344	-5.45102	0
2007-12-03	8.54579	3.54623	-5.41586	0.0144935				2007-12-03	3.81083	-2.33237	-10.7897	0.0477221				2007-12-03	10.1804	5.44983	-3.82077	0.0196573
2007-12-04	9.45284	5.87308	-4.80197	0				2007-12-04	10.2914	-4.00543	-12.2569	0				2007-12-04	7.54344	0.387878	-5.42825	0.0614123
2007-12-05	5.31475	3.78091	-3.21912	0				2007-12-05	10.1939	-3.23694	-11.7632	0				2007-12-05	4.63905	2.9487	-5.4122	0.0976787
2007-12-06	8.7667	7.80453	-5.29227	0.0337633				2007-12-06	9.42261	-0.996521	-11.4655	0.0313242				2007-12-06	7.1101	2.19632	-4.31451	0.101973
2007-12-07	5.98152	-0.383545	-9.35202	0.105057				2007-12-07	7.76781	1.13058	-8.82739	0.0127025				2007-12-07	6.12084	0.474457	-6.95389	0.0749893
2007-12-08	8.1636	-7.14453	-16.6418	0				2007-12-08	9.72765	3.68356	-7.11606	0				2007-12-08	7.67501	-0.487274	-8.62515	0
2007-12-09	10.5322	-7.27817	-17.5399	0				2007-12-09	9.46841	5.53656	-7.16446	0				2007-12-09	9.30455	0.834808	-8.23602	0.0543338
2007-12-10	10.4258	-4.14053	-15.2383	0				2007-12-10	6.54294	1.94827	-6.33401	1.30481				2007-12-10	6.67233	-0.629608	-11.0249	0.0669882
2007-12-11	10.3617	-0.389587	-14.6024	0				2007-12-11	3.82402	-3.27811	-11.3846	0.0595824				2007-12-11	8.26354	-3.21866	-12.9376	0.0169416
2007-12-12	9.55165	0.347809	-10.6577	0				2007-12-12	8.16828	-1.85159	-13.5516	0.0289881				2007-12-12	6.52606	-1.14447	-10.7859	0.0221823
2007-12-13	9.23828	3.0748	-9.91373	0				2007-12-13	9.53233	0.0744324	-9.64841	0.0621911				2007-12-13	9.307	0.905487	-9.27112	0.0119996
2007-12-14	8.9571	3.37564	-8.79797	0				2007-12-14	7.85069	-2.91663	-11.9965	0.0428309				2007-12-14	5.33251	0.921051	-8.25421	0.0326416
2007-12-15	6.59875	4.90054	-5.96597	0.0459513				2007-12-15	9.80848	-4.04892	-13.6085	0				2007-12-15	9.91329	2.37906	-8.22821	0
2007-12-16	9.05238	1.78293	-7.19861	0				2007-12-16	9.95251	-2.63525	-14.8344	0				2007-12-16	5.85602	1.99118	-6.44778	0
2007-12-17	6.61612	0.166199	-8.28421	0				2007-12-17	9.39353	-5.82248	-17.4233	0				2007-12-17	6.68411	2.86429	-6.92557	0
2007-12-18	7.52779	1.31992	-8.31296	0				2007-12-18	9.04461	-6.99069	-18.5277	0				2007-12-18	6.39341	-0.696411	-8.0079	0.0500321
2007-12-19	9.15021	3.33163	-7.32718	0				2007-12-19	9.97977	-4.97916	-16.4417	0				2007-12-19	8.81347	1.09024	-9.20142	0.0262445
2007-12-20	9.45933	3.39722	-5.92929	0				2007-12-20	9.07796	-1.84616	-12.8239	0				2007-12-20	6.65895	-0.360107	-7.99869	0
2007-12-21	9.68739	1.83878	-8.35712	0				2007-12-21	9.43859	1.49661	-11.6892	0				2007-12-21	7.24746	3.32004	-8.65912	0
2007-12-22	9.59699	5.20309	-9.8396	0				2007-12-22	9.6973	-4.68283	-13.5713	0				2007-12-22	9.43154	7.19846	-8.33578	0
2007-12-23	8.37945	1.83798	-5.94345	0				2007-12-23	9.48821	-3.70074	-15.1831	0				2007-12-23	8.0751	-2.1471	-12.2395	0
2007-12-24	4.75179	2.68906	-5.83621	0				2007-12-24	8.25839	-4.82266	-13.1847	0				2007-12-24	9.40352	-3.43613	-14.8668	0
2007-12-25	8.67581	2.77713	-6.41104	0				2007-12-25	9.51573	-2.22562	-12.2856	0				2007-12-25	9.46282	-7.53766	-16.4457	0
2007-12-26	9.38982	5.26376	-7.22952	0				2007-12-26	9.98512	-2.29056	-11.7641	0				2007-12-26	9.55918	-7.94989	-17.6552	0
2007-12-27	9.40947	5.27267	-7.00894	0.367542				2007-12-27	8.76091	2.1318	-9.33322	0				2007-12-27	7.92755	-6.88275	-18.3153	0
2007-12-28	7.10686	-0.659637	-9.00339	0.127192				2007-12-28	9.47861	1.63556	-9.90183	0				2007-12-28	8.04631	-6.04275	-16.971	0
2007-12-29	7.68977	-3.11197	-12.4456	0				2007-12-29	8.38597	1.45792	-10.0604	0				2007-12-29	9.53884	-7.29355	-17.6779	0
2007-12-30	9.11172	-3.86606	-13.5158	0				2007-12-30	9.02711	-4.01294	-17.8513	0				2007-12-30	9.96977	-0.407715	-14.849	0
2007-12-31	9.17148	-4.57089	-14.3505	0				2007-12-31	9.54708	-9.04263	-21.8398	0.0118428				2007-12-31	9.55	3.16666	-11.5618	0
2008-01-01	9.74947	0.123383	-12.3554	0				2008-01-01	9.76584	-6.59769	-20.2695	0				2008-01-01	8.31251	4.64636	-6.4863	0
2008-01-02	9.28329	2.30679	-9.55106	0				2008-01-02	9.67353	-3.23459	-15.1647	0				2008-01-02	8.34389	-1.37711	-11.3642	0
2008-01-03	3.38731	2.95685	-8.47946	0.0140394				2008-01-03	9.99833	-2.09781	-13.6984	0				2008-01-03	10.09	0.812836	-12.0196	0
2008-01-04	7.70074	-0.275543	-8.28998	0.0410834				2008-01-04	5.7131	-5.98972	-14.463	0				2008-01-04	9.19528	3.6149	-7.55124	0
2008-01-05	7.75678	5.7771	-8.23486	0.101853				2008-01-05	9.23355	-5.30701	-15.0908	0				2008-01-05	4.63735	1.32571	-8.09195	0
2008-01-06	1.0272	1.41055	-12.6762	0.413278				2008-01-06	10.319	-0.338715	-12.9497	0				2008-01-06	10.2906	5.65176	-6.25888	0
2008-01-07	10.1586	-7.26553	-13.8077	0				2008-01-07	7.74697	-2.53516	-11.4616	0				2008-01-07	2.16628	-0.0690308	-8.31143	0.637921
2008-01-08	10.2382	-0.509186	-14.4848	0				2008-01-08	8.64991	-5.49261	-16.3892	0				2008-01-08	6.1472	-8.56018	-16.6096	0.26095
2008-01-09	9.8747	1.17392	-11.7376	0.0641007				2008-01-09	10.1436	-5.90601	-17.1828	0				2008-01-09	10.368	-2.52921	-15.2698	0
2008-01-10	6.30277	2.75345	-8.56564	0				2008-01-10	10.2529	-5.05392	-15.7027	0				2008-01-10	10.2812	4.35754	-9.55637	0
2008-01-11	10.1674	4.0444	-7.21127	0				2008-01-11	10.324	-4.00049	-15.5905	0				2008-01-11	7.58121	3.95373	-7.09274	0
2008-01-12	10.1168	4.06207	-9.59897	0				2008-01-12	10.4837	-2.72849	-16.2766	0				2008-01-12	7.25696	-0.274017	-6.427	0.00368981
2008-01-13	8.94616	-0.262726	-10.8516	0.00973143				2008-01-13	10.6829	-1.32648	-15.4383	0				2008-01-13	8.81915	-0.751038	-10.3596	0
2008-01-14	9.6314	1.6889	-11.1118	0				2008-01-14	10.0349	-1.29016	-12.6638	0				2008-01-14	10.3283	7.39371	-9.10043	0
2008-01-15	7.00427	1.14889	-10.1845	0.168599				2008-01-15	11.1779	-0.616638	-12.5123	0				2008-01-15	9.68261	6.25565	-4.44162	0
2008-01-16	6.53648	-0.874634	-12.1668	0.00938571				2008-01-16	9.81235	2.12485	-8.68106	0				2008-01-16	7.18034	5.2294	-5.1745	0
2008-01-17	10.7657	0.75058	-12.8802	0				2008-01-17	9.5919	3.73895	-5.82434	0				2008-01-17	4.28407	2.06464	-6.20413	0.044311
2008-01-18	11.2015	1.64829	-12.675	0				2008-01-18	10.1572	5.45407	-6.13742	0				2008-01-18	4.70642	-2.39423	-10.0515	6.06004
2008-01-19	9.81705	-1.20056	-12.6119	0				2008-01-19	10.4371	6.17673	-8.53552	0				2008-01-19	3.64081	-5.64267	-15.4891	1.10791
2008-01-20	9.9014	-3.19376	-13.9344	0				2008-01-20	10.5568	4.79184	-5.06061	0				2008-01-20	7.03174	-9.58783	-19.7588	0.140538
2008-01-21	8.09464	-3.78424	-16.2746	0				2008-01-21	8.43196	12.3891	-5.09164	0				2008-01-21	9.45537	-12.8993	-22.107	0.0322285
2008-01-22	9.99375	-12.7322	-20.1285	0				2008-01-22	9.09366	6.55335	-5.4697	0				2008-01-22	12.1796	-11.6632	-23.0709	0
2008-01-23	12.0982	-11.5273	-21.9391	0				2008-01-23	11.0506	0.528442	-9.32428	0				2008-01-23	12.1699	-1.4783	-13.6394	0
2008-01-24	12.4216	-0.678986	-19.4435	0				2008-01-24	10.5878	-1.76425	-12.5711	0				2008-01-24	7.03703	-5.26016	-13.0931	0.0038117
2008-01-25	11.3364	-4.4664	-16.6892	0				2008-01-25	11.3568	3.5788	-7.87872	0				2008-01-25	12.1122	0.749908	-12.1874	0
2008-01-26	12.2746	-1.83923	-17.8872	0				2008-01-26	11.4738	2.59842	-10.0425	0				2008-01-26	12.3783	-1.33743	-13.7512	0
2008-01-27	12.046	0.244507	-11.4435	0				2008-01-27	11.2352	3.90286	-7.03851	0				2008-01-27	11.9701	-1.27774	-14.0168	0
2008-01-28	10.6746	3.5878	-10.3064	0				2008-01-28	9.93142	6.5975	-7.05508	0				2008-01-28	12.5417	0.623657	-10.3319	0
2008-01-29	10.6746	-6.47714	-17.6711	0				2008-01-29	9.93142	4.51398	-6.9108	0				2008-01-29	12.5417	1.03101	-8.91428	0
2008-01-30	8.07894	-13.765	-19.1878	0.0777663				2008-01-30	9.71427	0.150635	-13.0254	0.00896161				2008-01-30	12.3345	3.93381	-6.98926	0
2008-01-31	11.0226	-0.958283	-17.2394	0.0019843				2008-01-31	10.6807	-6.78159	-17.5391	0.0275903				2008-01-31	12.372	8.81711	-3.26169	0
2008-02-01	12.6648	-1.88275	-13.01	0				2008-02-01	11.7789	-9.45505	-19.9008	0.0286633				2008-02-01	12.5826	5.79428	-4.74811	0
2008-02-02	12.4241	1.26852	-13.1334	0				2008-02-02	7.20297	-5.48462	-19.6396	0.0635743				2008-02-02	10.8989	0.0502625	-8.96246	0.0101823
2008-02-03	11.9109	1.55966	-11.3963	0				2008-02-03	12.7511	-6.53232	-18.5234	0.0127948				2008-02-03	11.3833	4.39664	-9.78665	0
2008-02-04	12.4148	5.29114	-10.1335	0				2008-02-04	12.7631	-4.35388	-15.7286	0				2008-02-04	12.8802	-2.85184	-10.7032	0
2008-02-05	13.2203	4.57513	-6.52686	0				2008-02-05	13.1356	-5.57251	-16.3194	0				2008-02-05	10.5383	4.37	-9.48151	0.0113817
2008-02-06	13.4919	5.64352	-8.89169	0				2008-02-06	11.0186	-5.26193	-19.9012	0				2008-02-06	13.5065	2.29868	-7.32437	0
2008-02-07	11.6814	7.68976	-3.80627	0				2008-02-07	12.3618	1.27331	-12.9816	0				2008-02-07	12.2731	0.840851	-10.969	0.164188
2008-02-08	12.9121	10.0081	-1.62521	0				2008-02-08	12.3883	2.85089	-8.37528	0				2008-02-08	9.39429	4.03155	-6.5192	0.0466428
2008-02-09	11.6012	8.50183	-2.34335	0.00946592				2008-02-09	12.7578	6.56259	-5.19321	0				2008-02-09	8.60842	9.565	-1.34396	0.0268184
2008-02-10	6.93946	5.15668	-3.93549	0.182542				2008-02-10	12.027	6.3775	-6.66058	0				2008-02-10	9.01936	7.41116	-3.69952	0
2008-02-11	13.7183	8.23706	-3.68027	0				2008-02-11	7.55143	5.20493	-6.48862	0.011841				2008-02-11	13.7732	10.7923	-4.85843	0
2008-02-12	13.2569	3.00394	-3.48453	0.0389838				2008-02-12	11.417	3.56366	-9.47745	0.0325819				2008-02-12	13.2976	4.76065	-6.68054	0
2008-02-13	5.57889	10.7158	-1.02448	0.0132743				2008-02-13	5.14723	1.83759	-9.80759	0.093332				2008-02-13	14.3469	10.3801	-4.2214	0
2008-02-14	13.5527	11.9082	-1.62366	0.0294463				2008-02-14	12.9952	3.18832	-10.1965	0.0258413				2008-02-14	14.4802	6.32339	-5.13364	0
2008-02-15	13.6132	6.0961	-2.27292	0.0163311				2008-02-15	14.1141	3.43893	-6.98587	0.0196902				2008-02-15	15.091	13.3536	-0.101654	0
2008-02-16	13.7694	3.08566	-2.40723	0				2008-02-16	10.8888	0.823852	-13.8741	0.016197				2008-02-16	14.4708	17.1507	2.69223	0
2008-02-17	6.02836	9.32028	-1.36124	0.0792773				2008-02-17	13.9011	-5.43164	-16.4558	0.0369982				2008-02-17	14.5767	12.9445	-1.11716	0
2008-02-18	14.1816	13.4119	-2.20529	0.00407752				2008-02-18	14.5608	-0.265442	-14.3425	0				2008-02-18	8.65454	12.6231	-0.867371	0
2008-02-19	13.8162	8.49103	-3.21994	0.0244569				2008-02-19	14.9679	0.13681	-9.68338	0				2008-02-19	15.3074	17.7192	1.8591	0
2008-02-20	11.9983	-0.178009	-3.87994	0.073881				2008-02-20	11.2434	2.99881	-8.81787	0				2008-02-20	15.4399	7.65829	-2.28726	0
2008-02-21	1.37966	-0.9534	-6.36807	0.247226				2008-02-21	14.3239	3.43048	-6.50873	0				2008-02-21	5.61804	7.09448	-3.24814	0.0908176
2008-02-22	4.75353	0.486359	-7.32312	0.268383				2008-02-22	15.1657	6.61594	-4.8826	0				2008-02-22	13.434	8.28467	-3.97327	0.0170085
2008-02-23	11.8823	1.2207	-6.24567	0				2008-02-23	15.7469	9.72745	-3.44199	0				2008-02-23	16.2108	10.8068	-1.87198	0
2008-02-24	13.702	1.03317	-7.16473	0.057827				2008-02-24	15.7689	6.57471	-3.77728	0				2008-02-24	13.6092	14.3406	0.916626	0
2008-02-25	15.7468	2.34283	-7.52109	0.0227625				2008-02-25	15.4166	5.86838	-7.78445	0				2008-02-25	16.4916	5.63123	-8.88855	0
2008-02-26	16.493	4.3526	-5.25833	0				2008-02-26	15.9695	1.86829	-10.6427	0				2008-02-26	8.4322	-4.52533	-14.1758	0.0657419
2008-02-27	15.9658	1.00796	-5.49402	0				2008-02-27	15.4973	2.70019	-9.11649	0.322279				2008-02-27	14.4228	5.0148	-10.7992	0.0116972
2008-02-28	14.1017	7.30173	-3.35883	0.0050471				2008-02-28	10.9819	8.09317	-3.94751	0.0811083				2008-02-28	17.2955	8.48471	-3.93259	0
2008-02-29	14.1893	7.30173	-3.35883	0				2008-02-29	15.0353	8.09317	-3.94751	0.0706655				2008-02-29	16.9525	8.48471	-3.93259	0
2008-03-01	15.0402	8.62112	-7.07614	0.427505				2008-03-01	10.8747	5.94473	-4.17404	0.0613994				2008-03-01	18.0077	6.19327	-5.14304	0
2008-03-02	7.67661	0.478119	-11.2458	0.216163				2008-03-02	12.041	5.13107	-4.99622	0.281889				2008-03-02	16.4682	6.1109	-5.20608	0
2008-03-03	19.3392	2.95306	-12.4063	0				2008-03-03	15.0257	7.32632	-4.69223	0.0499293				2008-03-03	19.2684	3.87979	-7.10477	0
2008-03-04	19.2948	5.96551	-6.04864	0.00959366				2008-03-04	17.3029	14.2812	-1.68869	0				2008-03-04	17.7208	4.84769	-5.44141	0
2008-03-05	16.1252	13.3805	-1.30579	0.0310204				2008-03-05	8.27671	-1.23642	-9.85147	0.725039				2008-03-05	17.873	8.49002	-3.17633	0.0113446
2008-03-06	18.5226	14.9738	-0.0151367	0				2008-03-06	16.9053	1.80911	-12.3968	0				2008-03-06	12.5346	5.59616	-3.45294	0.350002
2008-03-07	17.4088	18.633	0.620789	0				2008-03-07	17.6103	5.90643	-8.00342	0				2008-03-07	12.704	6.52542	-3.8649	0.086921
2008-03-08	16.5847	14.434	-4.02234	0.632418				2008-03-08	19.6028	5.74133	-5.26016	0				2008-03-08	10.4752	7.09525	-2.85071	0.0682524
2008-03-09	18.9768	11.223	-3.64423	0				2008-03-09	19.057	14.2008	0.479767	0				2008-03-09	16.9281	8.02683	-3.59079	0
2008-03-10	8.30707	4.64798	-4.01242	1.37854				2008-03-10	18.8613	10.6299	0.548218	0				2008-03-10	16.5218	8.99908	-1.39121	0
2008-03-11	18.1861	3.43863	-6.50342	1.41834				2008-03-11	18.2424	12.4161	-2.5238	0.0280042				2008-03-11	20.085	15.745	1.26486	0
2008-03-12	9.74591	0.17453	-7.90256	0.543385				2008-03-12	18.4009	15.3329	1.20047	0				2008-03-12	16.5922	25.9507	8.70581	0.00338025
2008-03-13	11.2684	-0.819336	-8.56595	0.0999524				2008-03-13	9.15133	14.5734	1.95254	0.0392527				2008-03-13	18.294	21.9887	6.36182	0.0405832
2008-03-14	15.9132	1.62149	-9.56259	0.0014242				2008-03-14	13.7324	12.9991	1.6943	0.0309145				2008-03-14	15.3352	13.2228	2.89279	0.0812886
2008-03-15	20.8639	6.21115	-5.72269	0				2008-03-15	18.6309	16.167	-0.806671	0.060296				2008-03-15	7.19768	4.05875	-3.18414	4.39514
2008-03-16	20.4595	7.84479	-3.32996	0				2008-03-16	19.9901	2.84817	-4.5173	0.0373958				2008-03-16	10.1312	3.99127	-4.93957	0.161467
2008-03-17	19.2287	10.8695	-1.37628	0.0386652				2008-03-17	19.7861	5.9064	-5.08438	0				2008-03-17	16.1505	6.24991	-3.13217	0.028841
2008-03-18	11.0923	8.19205	0.66568	0.128942				2008-03-18	20.5388	10.6504	-1.99149	0				2008-03-18	22.0737	23.0637	3.55887	0
2008-03-19	13.3063	8.66989	0.960907	0.80514				2008-03-19	19.7884	10.7093	0.121735	0				2008-03-19	18.6649	27.1797	10.0928	0.186268
2008-03-20	7.972	6.83365	0.629791	0.134536				2008-03-20	18.9345	9.17017	-0.446808	0				2008-03-20	8.21211	13.4288	5.82724	0.190738
2008-03-21	20.003	11.564	-0.10202	0.0274858				2008-03-21	17.1384	12.7293	1.70593	0.103947				2008-03-21	9.87336	9.70343	1.28525	0.505262
2008-03-22	21.4017	13.5392	-0.409882	0				2008-03-22	17.2266	11.2987	1.63687	0.0160402				2008-03-22	14.0188	10.5213	1.62894	0
2008-03-23	21.1592	13.4029	2.70847	0.0283228				2008-03-23	12.0901	8.57626	-0.655426	0.501553				2008-03-23	16.018	13.1565	3.0683	0
2008-03-24	18.2171	14.5656	1.04401	0.0234833				2008-03-24	12.3791	6.68051	-3.0603	0.0614403				2008-03-24	19.9331	17.2627	5.34354	0.0782353
2008-03-25	22.2798	10.7465	-1.26062	0				2008-03-25	13.2701	6.59131	-4.47269	0.16403				2008-03-25	14.9207	11.4558	2.1694	0.0995675
2008-03-26	21.6749	16.579	-0.545044	0				2008-03-26	17.7318	9.85519	-2.79306	0.0642526				2008-03-26	18.5542	14.6719	1.40347	0.0808572
2008-03-27	18.3784	15.1801	-0.602051	0.0015052				2008-03-27	19.8111	12.6969	1.34351	0.031374				2008-03-27	12.7322	12.7063	4.05371	1.9501
2008-03-28	23.8726	7.76694	-1.99115	0				2008-03-28	19.7538	17.3153	3.70194	0				2008-03-28	8.13938	12.2823	3.9205	0.23443
2008-03-29	16.0809	10.2329	1.21408	0.0545663				2008-03-29	21.8803	16.0873	4.45767	0				2008-03-29	12.9762	8.54983	-1.02933	0.204612
2008-03-30	16.1686	8.93851	1.04391	0				2008-03-30	19.9153	15.6303	4.66269	0.569157				2008-03-30	14.2559	5.53049	-2.33518	0.153997
2008-03-31	24.234	13.4109	1.63458	0				2008-03-31	3.49331	8.76209	1.63571	0.84405				2008-03-31	12.5308	6.43137	-1.35498	0.234485
2008-04-01	23.4969	15.4568	2.0423	0.00824009				2008-04-01	15.1353	9.15097	1.3848	0.481917				2008-04-01	15.2413	7.63321	-1.46454	0.571739
2008-04-02	19.1283	16.5034	5.5022	0.274885				2008-04-02	18.6246	11.5353	1.0632	0.503946				2008-04-02	23.1312	12.6354	0.992157	0.129515
2008-04-03	23.5139	19.2023	4.89981	0				2008-04-03	14.8302	8.86276	-2.73889	0.407727				2008-04-03	19.7645	14.5016	3.30747	1.04316
2008-04-04	21.3531	19.6684	6.62253	0.0231933				2008-04-04	15.3232	10.1227	0.798309	0.305931				2008-04-04	23.5864	14.5357	3.98196	0.0941464
2008-04-05	15.9359	22.5277	7.54568	0.188486				2008-04-05	13.9727	9.76477	1.09592	1.05947				2008-04-05	23.5177	17.7109	6.42648	0.0636315
2008-04-06	22.8152	15.265	5.91382	0.0170963				2008-04-06	12.0413	9.17007	-0.408112	0.351107				2008-04-06	18.768	15.4806	2.20078	0
2008-04-07	19.5556	15.4012	2.5845	0				2008-04-07	22.7357	16.1825	1.39993	0.0741004				2008-04-07	19.984	15.2009	2.69333	0.351548
2008-04-08	16.1876	11.1614	2.09665	0.74864				2008-04-08	22.4754	15.008	0.619995	0.022887				2008-04-08	8.14133	9.42703	3.09091	2.58636
2008-04-09	17.925	13.963	1.78177	0.623645				2008-04-09	24.1813	15.4979	3.47351	0				2008-04-09	23.3789	15.6221	3.65362	0.02752
2008-04-10	1.98124	9.77939	4.88034	0.414468				2008-04-10	18.2719	14.8604	2.58154	0.12467				2008-04-10	23.4223	18.7164	4.78311	0
2008-04-11	24.094	13.4348	2.07266	0				2008-04-11	24.1744	6.42267	-2.29263	0				2008-04-11	23.0774	5.84119	1.49469	0
2008-04-12	26.3048	16.1026	2.27795	0				2008-04-12	25.5308	7.9989	-0.525757	0				2008-04-12	25.2103	17.2295	4.37985	0
2008-04-13	25.9878	19.0587	3.41019	0				2008-04-13	26.1797	10.2375	0.0957336	0				2008-04-13	19.8441	15.2248	3.70523	0.000790823
2008-04-14	23.5666	21.9339	7.71762	0.0168085				2008-04-14	25.1872	16.3747	3.43426	0				2008-04-14	22.8626	18.538	4.86923	0
2008-04-15	26.2418	21.6829	8.35968	0				2008-04-15	24.8402	18.5774	7.51901	0.000348593				2008-04-15	24.5175	21.3784	9.75705	0.0119116
2008-04-16	23.6308	23.5451	8.31613	0				2008-04-16	25.1812	18.3324	7.39358	0				2008-04-16	24.2483	24.3303	11.7155	0.0332699
2008-04-17	15.973	16.8062	6.2254	0.011344				2008-04-17	23.3545	16.8673	5.05157	0				2008-04-17	21.6617	17.221	3.99655	0.0361403
2008-04-18	23.0272	14.8832	3.83432	0				2008-04-18	26.0004	15.8212	4.61508	0				2008-04-18	26.0515	18.0066	5.14743	0
2008-04-19	14.1198	16.6373	5.41657	0.430964				2008-04-19	20.958	12.7239	4.31738	0.667282				2008-04-19	25.4274	24.0404	12.2165	0
2008-04-20	14.4277	11.253	3.30759	0.107067				2008-04-20	21.1847	6.48019	0.98642	0.560481				2008-04-20	24.793	29.9068	14.8834	0.0589889
2008-04-21	27.2512	18.5205	4.97446	0.0519662				2008-04-21	21.3136	9.19022	0.700897	0.123991				2008-04-21	21.4038	28.9212	16.4518	0.0201887
2008-04-22	24.6291	21.6372	8.37283	0.0109523				2008-04-22	25.2197	15.5198	2.31384	0.0809586				2008-04-22	21.5925	26.6317	11.4885	0.478839
2008-04-23	26.0973	23.8994	9.78815	0				2008-04-23	26.1453	6.67697	-0.737366	0				2008-04-23	16.3924	15.1714	7.24631	0.0606643
2008-04-24	27.4712	22.2201	10.5364	0				2008-04-24	27.0444	8.82071	1.509	0				2008-04-24	25.0618	16.2389	7.1044	0
2008-04-25	25.8657	25.9563	12.4011	0				2008-04-25	27.5162	12.5437	2.92963	0				2008-04-25	27.1886	17.4007	7.1366	0
2008-04-26	21.7709	27.3344	14.4656	0.0763599				2008-04-26	26.7601	19.4798	6.89926	0				2008-04-26	26.9444	19.6897	9.45267	0
2008-04-27	20.5332	22.6957	12.1924	0				2008-04-27	25.8754	21.8664	9.05206	0				2008-04-27	23.1744	22.5027	8.48904	0
2008-04-28	25.5237	24.9717	13.4944	0				2008-04-28	26.5786	22.6128	12.4803	0.0556617				2008-04-28	27.9717	17.1001	5.84854	0
2008-04-29	18.6585	24.1322	14.3145	0				2008-04-29	25.8407	22.4781	11.9107	0.0428933				2008-04-29	26.7822	21.1058	8.32587	0.0264251
2008-04-30	10.0487	21.1419	14.4974	1.50964				2008-04-30	27.4316	28.52	15.0209	0				2008-04-30	20.3121	24.5371	12.7441	0.0511821
2008-05-01	16.7322	18.3301	6.97446	0.0973982				2008-05-01	25.0658	29.4533	14.2826	0				2008-05-01	22.078	25.8549	13.6073	0
2008-05-02	28.413	19.1135	7.42157	0				2008-05-02	13.7833	19.2316	14.1802	0.699463				2008-05-02	23.8252	21.5104	12.1033	0.0179462
2008-05-03	28.2759	25.8462	10.4992	0.0243273				2008-05-03	23.4115	25.5789	15.9406	0.122574				2008-05-03	19.921	18.7642	8.89005	0.306669
2008-05-04	26.3933	28.4782	14.4461	0.23192				2008-05-04	16.5587	24.9174	13.33	0.0576973				2008-05-04	15.2366	15.0033	7.75296	1.20124
2008-05-05	10.9586	9.60525	4.82541	1.24891				2008-05-05	15.0032	23.4813	13.3599	0.408636				2008-05-05	23.8024	22.4771	8.46704	0.114416
2008-05-06	28.828	19.8543	6.81339	0				2008-05-06	9.50425	17.687	9.20941	4.20044				2008-05-06	21.6891	21.6021	11.3925	0.0336818
2008-05-07	28.2897	24.1261	11.6573	0				2008-05-07	14.7264	16.0373	7.97125	0.237948				2008-05-07	17.6698	17.6697	9.05392	0.239985
2008-05-08	26.865	29.4042	14.333	0.0174306				2008-05-08	20.6013	15.226	7.1297	0.260916				2008-05-08	26.7417	22.5935	12.9797	0.0065495
2008-05-09	25.2344	20.9256	13.4889	0.846887				2008-05-09	28.8469	15.7707	6.3071	0				2008-05-09	27.5886	28.0461	15.7807	0.087236
2008-05-10	27.8522	25.5618	14.2141	0.173849				2008-05-10	27.0443	21.8517	11.5855	0				2008-05-10	25.2814	25.3498	15.2813	0.50073
2008-05-11	25.6507	30.2116	15.9601	0.0489895				2008-05-11	23.9335	25.3999	11.0102	0.134899				2008-05-11	21.9021	22.0496	14.2473	0.756564
2008-05-12	29.0211	21.0174	9.64664	0				2008-05-12	24.5456	25.2873	14.7611	0.153545				2008-05-12	21.3592	23.1004	12.3375	0.00153624
2008-05-13	15.6483	19.2271	7.86307	0.387794				2008-05-13	26.6351	24.0706	12.9833	0.265146				2008-05-13	28.9412	26.4503	14.1066	0.138612
2008-05-14	29.5299	23.1551	8.91934	0				2008-05-14	25.29	24.2279	14.2661	0.0716099				2008-05-14	26.3063	26.3294	15.4634	0.993507
2008-05-15	26.4719	26.1607	14.7422	0				2008-05-15	21.36	25.7083	13.2942	0.0102861				2008-05-15	17.5541	20.0869	11.1157	5.18342
2008-05-16	25.7214	28.418	17.0136	0.0593017				2008-05-16	9.77023	17.6976	11.7059	9.43995				2008-05-16	20.2912	19.7915	10.9208	0.850174
2008-05-17	26.9014	28.7161	17.8481	0.00787611				2008-05-17	28.4556	25.4844	13.3222	0				2008-05-17	19.7174	19.5501	9.68225	0.235095
2008-05-18	22.2194	25.1134	17.4156	0.429769				2008-05-18	25.9169	24.148	13.4525	0.0640316				2008-05-18	29.4254	18.8897	7.79459	0
2008-05-19	15.2274	22.4762	15.7028	3.06372				2008-05-19	21.9813	21.9497	13.271	0.68726				2008-05-19	29.7964	21.2166	11.898	0
2008-05-20	20.7654	22.1405	14.3482	1.77116				2008-05-20	27.2644	23.885	14.754	0				2008-05-20	29.7455	28.2732	16.3436	0
2008-05-21	8.10712	15.4929	9.39246	4.55631				2008-05-21	25.4473	26.7214	13.8599	0				2008-05-21	28.942	30.2255	18.3642	0
2008-05-22	20.9216	21.219	11.3516	0.0134453				2008-05-22	29.2255	22.8628	11.0888	0.0945594				2008-05-22	29.1018	29.6948	19.9877	0
2008-05-23	21.0204	22.5626	13.1594	0				2008-05-23	25.3817	25.3767	15.8753	0				2008-05-23	29.0401	36.1274	21.6364	0
2008-05-24	23.4076	23.7573	15.5922	0				2008-05-24	26.7064	26.7162	17.8666	0.0720271				2008-05-24	22.5482	33.9005	22.9585	0.0104239
2008-05-25	20.0318	24.3935	16.1793	0.0210674				2008-05-25	24.9234	24.5851	11.5078	1.77397				2008-05-25	13.7559	25.5313	19.3815	5.52905
2008-05-26	28.4013	26.5466	12.969	0				2008-05-26	27.2185	21.1519	11.3829	0.071055				2008-05-26	17.4432	24.7425	15.9058	7.72449
2008-05-27	22.2355	21.3145	13.393	0.0787045				2008-05-27	29.583	22.7298	12.5779	0				2008-05-27	20.4801	25.6229	18.2938	0.478652
2008-05-28	22.0691	21.0841	14.0845	0.0784406				2008-05-28	29.0848	25.4473	14.6865	0				2008-05-28	20.6988	25.9234	17.9309	1.34001
2008-05-29	23.3658	22.0887	14.7668	0.18546				2008-05-29	29.468	27.5343	15.8286	0				2008-05-29	14.5782	22.8156	16.8654	0.292152
2008-05-30	27.7761	27.7567	17.6951	0.488895				2008-05-30	24.0372	28.4685	15.9106	0				2008-05-30	13.1502	21.6533	15.4468	1.82429
2008-05-31	16.2461	24.2692	16.2112	0.417276				2008-05-31	24.7189	29.5453	14.8291	6.41473				2008-05-31	11.4978	18.7702	12.6477	7.18079
2008-06-01	22.5142	21.9955	10.7009	0.0310437				2008-06-01	6.01424	16.9992	10.1577	4.35748				2008-06-01	15.7765	18.6698	11.9627	0.211547
2008-06-02	29.4157	26.3492	12.4511	0.0464586				2008-06-02	22.191	22.4856	13.4804	0.282827				2008-06-02	22.5815	23.2637	15.1599	0.247181
2008-06-03	23.1012	27.5346	17.3788	0.230658				2008-06-03	28.1846	23.142	14.415	0.0588491				2008-06-03	29.4904	28.3687	16.2217	0
2008-06-04	22.3575	26.7113	17.6366	0.753067				2008-06-04	10.5546	17.6868	11.386	2.61723				2008-06-04	30.2262	20.1234	6.54523	0
2008-06-05	16.6407	26.7184	18.4655	1.58823				2008-06-05	24.5349	19.808	11.4695	0.414085				2008-06-05	28.889	20.7499	10.0516	0
2008-06-06	15.5558	23.7033	16.6788	0.789736				2008-06-06	29.6734	22.8502	13.217	0.314115				2008-06-06	29.2964	25.1547	15.5218	0.111057
2008-06-07	28.9853	26.2548	16.7677	0.241865				2008-06-07	28.6525	25.8548	15.0347	0.119418				2008-06-07	19.0512	23.3194	16.2972	0.1387
2008-06-08	30.0576	30.7352	17.2436	0				2008-06-08	28.9946	26.1293	16.0053	0.191798				2008-06-08	28.4671	27.5373	17.6176	0.0361033
2008-06-09	29.7579	30.4774	19.159	0				2008-06-09	26.1581	26.8753	14.7873	0				2008-06-09	27.4583	28.209	18.9884	0.00676998
2008-06-10	29.0185	29.7303	20.4912	0				2008-06-10	29.6068	28.8312	16.7125	0.139042				2008-06-10	18.5508	25.8563	17.4828	1.86981
2008-06-11	23.4177	28.2072	21.2269	0.18971				2008-06-11	26.4396	30.5989	17.4643	0				2008-06-11	16.7294	27.1447	18.0705	0.82239
2008-06-12	14.8364	23.2667	15.8356	4.75607				2008-06-12	26.1324	30.7377	19.5022	0.348241				2008-06-12	20.043	26.9504	19.2603	0.127028
2008-06-13	28.1658	24.0538	15.5834	0.0904053				2008-06-13	18.6612	26.7966	17.8019	2.15566				2008-06-13	16.2098	28.8706	18.2488	0.883251
2008-06-14	29.8633	29.9449	17.6616	0				2008-06-14	18.4459	25.6322	16.3697	2.07359				2008-06-14	25.2547	27.5437	19.844	0.712492
2008-06-15	27.4093	34.0374	19.402	0				2008-06-15	21.9494	27.7382	16.0667	0				2008-06-15	20.4326	27.0978	17.9217	4.59849
2008-06-16	30.6155	35.6318	18.3651	0				2008-06-16	25.9772	27.6328	16.8132	0				2008-06-16	28.7142	23.8239	15.7253	0
2008-06-17	25.2802	30.0234	19.6609	0				2008-06-17	30.1415	29.3231	17.4886	0.0919669				2008-06-17	25.1633	25.8319	18.0689	1.08121
2008-06-18	15.5747	25.8463	19.1378	1.29037				2008-06-18	31.0923	26.4258	14.4156	0.169536				2008-06-18	27.3488	26.2787	18.0361	0.719152
2008-06-19	19.1821	28.0837	20.6681	2.42316				2008-06-19	31.0311	25.5188	14.6201	0				2008-06-19	20.8628	26.0326	18.9115	0.127765
2008-06-20	8.88148	19.0334	14.8726	0.16751				2008-06-20	28.4957	28.2801	18.389	0				2008-06-20	28.7598	29.1332	19.1243	0
2008-06-21	16.3457	24.2224	16.9106	0.13079				2008-06-21	29.6294	29.9059	19.9855	0				2008-06-21	27.8248	28.6846	18.8948	0.0588496
2008-06-22	10.8496	24.8811	19.3268	1.0196				2008-06-22	24.3081	28.7948	20.1596	0.101444				2008-06-22	28.411	29.1087	21.3454	0.287987
2008-06-23	21.9326	26.4263	21.2223	2.77765				2008-06-23	26.1592	30.4288	20.9277	0.0878097				2008-06-23	23.989	29.493	22.2437	2.78632
2008-06-24	16.0891	25.4854	18.3846	5.37445				2008-06-24	25.7643	31.1956	19.552	0.0473773				2008-06-24	17.9147	27.7632	20.5335	5.56494
2008-06-25	11.8757	19.8719	15.2789	7.95169				2008-06-25	28.7251	29.002	18.9096	0				2008-06-25	21.6982	27.4045	19.4635	0.208342
2008-06-26	23.8002	25.9789	16.0591	0.121725				2008-06-26	16.2672	26.4409	16.4217	2.0949				2008-06-26	26.8373	29.7416	20.2899	0.0729521
2008-06-27	28.3127	26.0077	16.3707	0.227656				2008-06-27	11.8291	19.353	13.9966	15.7337				2008-06-27	24.1164	30.7858	23.0105	0.110063
2008-06-28	27.6294	29.4812	18.8795	2.01742				2008-06-28	24.2282	21.3465	15.4589	2.17005				2008-06-28	26.5098	32.3196	24.3391	0.51533
2008-06-29	14.7614	23.8665	16.2597	4.29084				2008-06-29	23.5012	22.3591	15.8041	3.53848				2008-06-29	23.3815	29.7416	21.3821	1.58037
2008-06-30	28.5347	29.0403	17.1335	0.134696				2008-06-30	28.0485	24.8891	13.4156	0.802593				2008-06-30	13.1499	22.5794	16.4822	0.239277
2008-07-01	27.332	30.856	19.1769	0.345864				2008-07-01	28.2313	28.7394	17.722	0.0785658				2008-07-01	28.15	23.936	16.5147	0.0611627
2008-07-02	17.4351	27.4657	20.3303	5.60672				2008-07-02	10.3264	23.0407	16.3021	1.26739				2008-07-02	26.7851	28.4367	20.3572	0.0902691
2008-07-03	11.6322	20.0765	16.173	9.63574				2008-07-03	27.0705	28.6191	16.3388	0.540307				2008-07-03	22.3682	27.852	19.6713	2.75254
2008-07-04	27.1365	26.1094	17.2109	0.571104				2008-07-04	26.9083	30.2638	19.1291	0				2008-07-04	23.4411	27.9335	19.7203	1.78529
2008-07-05	22.2569	28.5575	18.589	0.144751				2008-07-05	23.4339	29.4729	20.5246	0.0643349				2008-07-05	25.8049	27.3683	19.9621	0.11954
2008-07-06	26.9828	29.0091	18.6255	0.837025				2008-07-06	18.7794	28.3406	20.0232	1.44099				2008-07-06	18.8198	25.923	19.2444	2.02998
2008-07-07	26.4727	27.2982	18.3441	0.314966				2008-07-07	12.0788	25.196	16.4506	1.05229				2008-07-07	16.1168	24.6052	18.7094	2.76765
2008-07-08	18.1946	23.2378	19.1302	2.50709				2008-07-08	19.4358	26.6798	17.5185	0				2008-07-08	21.2308	25.3449	15.8605	0
2008-07-09	7.55875	17.8727	14.0171	1.08014				2008-07-09	25.2389	30.2794	19.0246	0.0737917				2008-07-09	26.0214	25.5869	16.1545	1.12968
2008-07-10	30.2844	28.3922	16.3119	0				2008-07-10	22.8626	29.5172	20.303	0				2008-07-10	29.0658	26.7417	17.4265	0.223177
2008-07-11	26.363	28.5309	17.9016	0.144763				2008-07-11	7.99908	26.0808	17.8	6.55135				2008-07-11	27.8166	26.4873	18.0483	0.237697
2008-07-12	23.1508	30.6758	19.6106	1.63539				2008-07-12	11.7518	20.2383	14.8904	13.3195				2008-07-12	26.0177	26.8258	16.6843	0.227667
2008-07-13	13.0844	25.7553	18.5758	1.14605				2008-07-13	11.1046	22.7377	13.6228	0.781522				2008-07-13	28.0603	25.8151	12.9882	0
2008-07-14	24.4772	26.7605	19.4175	1.16123				2008-07-14	26.4627	25.9561	15.0126	0.475657				2008-07-14	26.2639	24.9261	14.2284	0
2008-07-15	25.5026	27.5282	18.7969	2.88512				2008-07-15	27.9289	27.8757	15.9403	0.0473416				2008-07-15	24.4195	27.1128	18.4989	0
2008-07-16	24.8244	27.4441	20.1783	0.749312				2008-07-16	25.9192	29.9981	18.6267	0.991136				2008-07-16	22.4901	28.3631	19.3868	0.348783
2008-07-17	25.1859	27.9644	19.2393	0.449093				2008-07-17	19.0646	27.8783	19.822	0.0762389				2008-07-17	24.1382	28.581	20.8252	0.114132
2008-07-18	24.3668	26.2595	18.6029	2.01786				2008-07-18	21.1492	29.4619	19.2758	0				2008-07-18	18.5134	26.696	20.5019	2.17692
2008-07-19	26.7073	27.7874	19.9423	0.0697922				2008-07-19	18.0395	29.0312	20.4879	0.0277137				2008-07-19	15.6655	26.7428	19.8337	0.77885
2008-07-20	24.2679	33.841	21.5287	0.0958197				2008-07-20	27.2278	32.825	21.8584	0.700711				2008-07-20	18.0738	26.0688	18.7119	0.402563
2008-07-21	9.71432	29.181	22.4627	0.4747				2008-07-21	12.7691	23.4499	19.6119	2.79411				2008-07-21	16.0406	24.5733	17.6369	0.531616
2008-07-22	17.7702	26.9781	20.8783	2.76654				2008-07-22	17.0577	22.2703	16.3445	3.95066				2008-07-22	29.0772	27.6816	17.6302	0
2008-07-23	18.9888	25.2905	21.3972	1.67627				2008-07-23	24.611	23.4858	16.2682	1.98961				2008-07-23	28.0837	29.361	19.8962	0.0519901
2008-07-24	22.1848	29.1781	22.2791	0.856836				2008-07-24	28.4125	28.2911	17.1379	0				2008-07-24	26.1338	29.6152	20.6178	0.0575502
2008-07-25	25.3567	30.3206	22.883	0.700462				2008-07-25	28.6739	29.6795	17.8981	0				2008-07-25	24.1118	30.7219	20.9344	0.360875
2008-07-26	23.5889	31.3113	23.0032	0.484298				2008-07-26	22.1773	27.4692	17.0066	0.0544969				2008-07-26	8.30765	27.9225	20.2512	6.89121
2008-07-27	23.6755	30.786	23.5895	4.79748				2008-07-27	13.5719	21.3354	16.4295	0				2008-07-27	9.37508	26.7692	20.5042	19.1191
2008-07-28	15.5131	26.46	22.1375	1.38586				2008-07-28	24.5095	23.4055	14.4618	2.50498				2008-07-28	17.5459	25.436	16.7416	0.527605
2008-07-29	26.246	31.6578	24.0132	0.148208				2008-07-29	26.2247	26.5915	17.4594	0.301192				2008-07-29	28.403	27.6558	16.8783	0
2008-07-30	23.0769	30.7462	23.8974	1.75783				2008-07-30	16.7738	26.1429	16.7038	1.65357				2008-07-30	27.7847	28.1808	17.0035	0
2008-07-31	23.4846	31.4521	22.8344	8.34579				2008-07-31	15.1448	21.2763	14.3264	0.24722				2008-07-31	27.4013	29.6655	21.1662	0.0068219
2008-08-01	11.6284	21.1518	13.662	9.11029				2008-08-01	28.2044	31.442	19.9889	0.132852				2008-08-01	18.0271	26.0616	18.4613	1.8842
2008-08-02	27.6953	25.1604	12.6956	0				2008-08-02	24.4093	32.7902	21.1173	0				2008-08-02	20.9531	27.1624	17.202	0
2008-08-03	27.4233	26.2325	14.3534	0				2008-08-03	25.4248	30.4786	19.0458	1.25647				2008-08-03	22.3791	27.6001	21.0382	0
2008-08-04	26.8257	26.9018	16.9335	0				2008-08-04	11.1942	22.4052	17.4433	2.62444				2008-08-04	22.2383	27.7222	21.0725	0.271971
2008-08-05	23.2705	27.1336	17.1702	0.0970321				2008-08-05	26.856	28.0286	17.4293	0.215339				2008-08-05	18.511	25.7337	19.0186	0.356742
2008-08-06	20.6591	26.3997	18.9785	0.228508				2008-08-06	25.6532	28.2883	17.9189	0.480117				2008-08-06	19.8927	25.6149	19.4	0.477096
2008-08-07	19.5834	28.0965	20.5706	5.25722				2008-08-07	25.0115	27.5036	18.8776	0				2008-08-07	12.8585	22.6281	17.2254	3.3387
2008-08-08	6.0159	23.1589	18.8846	9.96704				2008-08-08	20.7763	25.1963	18.8473	0.32983				2008-08-08	21.1112	26.4722	15.5011	0
2008-08-09	21.1007	26.5104	19.8512	0.488289				2008-08-09	23.6128	28.1915	19.821	0.320965				2008-08-09	28.4771	27.7867	13.6056	0
2008-08-10	18.3659	25.5598	20.9952	2.21089				2008-08-10	11.5049	22.4437	15.2348	1.74918				2008-08-10	27.0677	28.2808	16.6299	0
2008-08-11	11.2199	23.6912	19.0356	4.54351				2008-08-11	22.304	26.1411	17.4355	0.208471				2008-08-11	26.0742	30.1429	18.2002	0.368321
2008-08-12	23.97	26.8965	17.0487	0.0764444				2008-08-12	23.6205	28.6377	17.6565	0				2008-08-12	27.3379	25.863	13.584	0
2008-08-13	14.0693	25.1014	16.3342	2.05601				2008-08-13	27.2593	28.7196	17.6711	0				2008-08-13	27.3687	25.7075	15.3252	0
2008-08-14	16.8703	23.6863	15.6018	0.0644374				2008-08-14	27.2512	28.4185	17.1285	0.129417				2008-08-14	27.057	28.1396	17.9728	0
2008-08-15	24.8276	29.507	14.3162	0				2008-08-15	24.0833	27.6475	18.7389	0				2008-08-15	24.7606	29.3762	18.2246	0
2008-08-16	21.0038	28.3275	13.6249	1.36838				2008-08-16	23.6889	29.0881	20.5059	0.41222				2008-08-16	23.8585	29.9461	19.3191	0
2008-08-17	9.96869	19.1107	13.6777	0.90224				2008-08-17	18.3322	26.4457	18.4431	0.175944				2008-08-17	20.9138	28.1472	19.667	0.120074
2008-08-18	26.2273	23.6944	14.2922	0				2008-08-18	24.5441	30.5523	19.7365	0.11531				2008-08-18	15.3943	24.7376	18.6496	1.13553
2008-08-19	26.1655	26.4608	14.8864	0				2008-08-19	24.6411	30.5531	20.0833	0.0793721				2008-08-19	10.7589	21.6171	15.4206	0.91715
2008-08-20	26.299	28.5993	17.1013	0				2008-08-20	12.641	28.9709	20.0718	0.333916				2008-08-20	23.544	27.8269	16.9139	0.328979
2008-08-21	23.7517	26.9078	17.0999	0				2008-08-21	22.0226	28.9372	18.9121	0.106863				2008-08-21	24.5427	29.7612	17.1309	0
2008-08-22	24.8412	26.8601	17.5291	0.011447				2008-08-22	13.8962	30.4807	18.9738	0.34898				2008-08-22	26.0039	33.9044	18.819	0
2008-08-23	21.0031	26.5222	17.8427	0.414163				2008-08-23	18.2902	27.8407	18.9783	0.305224				2008-08-23	24.0891	34.9808	20.1337	1.73657
2008-08-24	15.2949	22.6499	17.887	0.321484				2008-08-24	26.3338	26.4769	17.5242	0				2008-08-24	16.9233	26.353	16.6748	0.626729
2008-08-25	22.081	26.4653	16.9228	0.176769				2008-08-25	24.1162	30.3184	18.6074	0				2008-08-25	24.3592	30.1001	20.3517	0.0830395
2008-08-26	24.4725	26.6625	17.9492	0.110561				2008-08-26	23.7075	33.1692	20.456	0.133748				2008-08-26	20.0243	29.9013	17.8048	0.0970343
2008-08-27	13.1259	22.3902	15.0717	0.603483				2008-08-27	15.5938	27.5537	18.7889	0.395816				2008-08-27	24.0672	31.8101	19.5747	0.208778
2008-08-28	24.4612	28.0626	16.3259	0				2008-08-28	9.9401	18.6425	13.5253	4.97733				2008-08-28	9.34213	22.6318	15.6765	1.5072
2008-08-29	21.0151	27.5083	17.6706	0				2008-08-29	24.5939	26.3491	15.5556	0				2008-08-29	24.6146	31.5927	16.6847	0
2008-08-30	20.291	27.7567	18.5234	1.52955				2008-08-30	22.0455	29.0601	18.6052	1.45457				2008-08-30	22.0236	29.0781	15.7435	0.164681
2008-08-31	22.8212	26.5091	18.4818	0.016771				2008-08-31	22.6096	24.4789	14.9012	0.358828				2008-08-31	24.0072	26.4941	11.5454	0
2008-09-01	19.355	26.3557	18.2248	0.264288				2008-09-01	24.3627	22.926	14.4448	0				2008-09-01	24.0374	29.4306	17.8678	0
2008-09-02	17.6509	25.6739	16.0812	1.90041				2008-09-02	18.3685	24.265	16.1472	1.91512				2008-09-02	22.3981	30.106	18.2486	0.303941
2008-09-03	13.9791	15.0573	9.85086	2.89839				2008-09-03	17.01	23.3439	15.6588	0.17933				2008-09-03	18.5392	27.9259	17.4871	0.934679
2008-09-04	10.3072	15.8416	7.90543	2.30492				2008-09-04	20.3866	26.4699	17.2666	0.170626				2008-09-04	13.6314	23.1436	14.5572	1.02106
2008-09-05	23.5734	20.7162	9.15454	0.0402193				2008-09-05	18.0526	27.2117	16.9666	0.13943				2008-09-05	19.434	26.7251	16.1974	0.0102928
2008-09-06	22.9237	22.8878	10.2907	0				2008-09-06	23.1081	25.9582	17.6702	0				2008-09-06	14.5524	25.7135	16.5841	0.193127
2008-09-07	19.9461	23.5322	12.2041	0.146937				2008-09-07	19.1786	25.691	15.1046	0				2008-09-07	11.4595	23.0814	15.297	0.875152
2008-09-08	13.5754	24.3536	13.1552	0				2008-09-08	17.1463	25.1529	16.3965	0.1567				2008-09-08	10.3119	23.4344	15.2739	1.01283
2008-09-09	21.9517	27.431	14.3222	0.0750695				2008-09-09	17.6194	28.7147	14.8542	0				2008-09-09	10.3252	24.5977	16.3312	2.29047
2008-09-10	20.8476	26.6052	16.2104	0.0555972				2008-09-10	19.1656	29.2802	17.9799	0.245596				2008-09-10	15.0437	24.1698	13.1245	0.256234
2008-09-11	17.0316	23.3102	16.4977	0.293065				2008-09-11	21.503	27.6521	15.7333	0.0449693				2008-09-11	22.719	24.9671	15.2797	0
2008-09-12	1.69908	17.7179	11.887	2.01617				2008-09-12	22.879	25.2191	14.7788	0				2008-09-12	13.2587	19.0703	12.4025	0.798348
2008-09-13	19.1817	26.4593	12.0091	0.912145				2008-09-13	21.1147	26.5482	14.239	0				2008-09-13	10.515	23.6756	15.0132	1.071
2008-09-14	4.8133	16.4522	9.33695	0.344388				2008-09-14	9.78452	22.6532	14.1065	2.60706				2008-09-14	12.1053	23.3643	13.2073	0.910361
2008-09-15	22.373	22.7211	9.6835	0				2008-09-15	19.7771	23.2587	12.7546	0.274929				2008-09-15	12.7216	27.5074	17.0656	1.84656
2008-09-16	21.2227	24.2504	9.79367	0.0615009				2008-09-16	15.0323	21.4679	12.4448	0.145491				2008-09-16	9.19978	17.7509	12.7263	2.4045
2008-09-17	11.0974	18.7549	8.03744	2.50596				2008-09-17	12.5047	23.7898	13.1501	0.114323				2008-09-17	12.424	18.9301	10.5791	0.340083
2008-09-18	21.8972	20.2795	8.4455	0				2008-09-18	21.0525	26.0097	14.5422	0.140041				2008-09-18	18.5887	27.2429	14.0462	0.0488048
2008-09-19	21.3646	26.6883	10.8283	0				2008-09-19	19.7715	27.3245	14.3028	0.0501331				2008-09-19	21.2978	30.4916	16.3559	0
2008-09-20	12.8353	20.6395	6.12091	1.73258				2008-09-20	19.4441	25.7952	15.1521	1.02016				2008-09-20	17.5636	24.74	12.8361	0.276195
2008-09-21	19.5767	19.0692	6.8389	0.0922036				2008-09-21	15.1792	26.7658	15.2096	0.0840341				2008-09-21	6.80197	14.1567	6.92093	7.88795
2008-09-22	16.4702	18.6105	7.45752	0				2008-09-22	15.0305	24.6461	12.3567	0.0868809				2008-09-22	6.63931	13.0344	5.29489	0.496445
2008-09-23	17.9153	20.8367	9.96536	0.461855				2008-09-23	14.8922	18.3545	9.37589	0				2008-09-23	11.8355	17.2761	6.24057	0.0208081
2008-09-24	11.559	18.4641	9.17014	0.165277				2008-09-24	13.9219	16.4381	7.26849	0				2008-09-24	11.3618	17.3031	8.40714	0
2008-09-25	18.251	20.3032	8.33209	0				2008-09-25	11.2562	18.1293	7.28598	0.167641				2008-09-25	6.23287	14.4179	7.02951	5.50647
2008-09-26	19.3999	22.8129	8.44293	0.064876				2008-09-26	15.5202	22.3426	11.6733	0.227436				2008-09-26	6.13397	11.858	3.49966	7.53845
2008-09-27	13.899	21.8903	12.2274	0.397544				2008-09-27	17.1493	19.6552	9.42474	0.0744838				2008-09-27	7.19507	9.539	2.50501	0.976372
2008-09-28	14.7022	22.1731	11.4104	0.0773789				2008-09-28	19.8669	22.7285	10.5679	0				2008-09-28	12.2423	14.2438	1.77145	0.0304748
2008-09-29	14.7519	19.8528	9.56967	0.1506				2008-09-29	16.6421	23.2278	10.5298	0				2008-09-29	13.2798	18.3814	5.41217	0.0224938
2008-09-30	15.678	18.3412	8.45822	0.0562688				2008-09-30	16.4408	18.3395	9.65122	0				2008-09-30	11.3309	17.5589	5.23779	0.0484616
2008-10-01	17.8274	20.2772	8.18356	0				2008-10-01	8.17594	17.552	7.5022	0.349953				2008-10-01	19.6788	18.7978	4.59415	0
2008-10-02	14.4966	18.8315	7.01971	0.0457892				2008-10-02	16.4654	19.1245	8.70047	0.161337				2008-10-02	19.1238	19.5151	5.33881	0
2008-10-03	16.7741	16.676	6.56802	0.049115				2008-10-03	18.4945	25.0321	10.4471	0.0935089				2008-10-03	19.0966	21.2003	7.58923	0.0568702
2008-10-04	18.3189	19.5494	6.93246	0.16905				2008-10-04	17.7983	21.0876	7.88284	0				2008-10-04	18.4088	22.6665	9.83646	0
2008-10-05	12.8942	16.9829	7.28986	0.0561191				2008-10-05	15.0636	17.8866	6.01672	0.0632666				2008-10-05	16.5837	23.2256	11.202	0.291387
2008-10-06	16.9894	20.5985	6.83237	0				2008-10-06	15.865	19.8961	6.53427	0				2008-10-06	18.2169	21.8125	11.1053	0
2008-10-07	12.2057	19.9624	8.82205	0.960323				2008-10-07	13.4569	18.55	4.32111	0.134482				2008-10-07	7.24487	16.1255	6.14227	4.05737
2008-10-08	12.3697	14.9942	2.13153	0.17463				2008-10-08	12.3432	19.2626	6.96014	0.0646539				2008-10-08	12.3222	10.8085	0.224457	0.0318304
2008-10-09	18.673	14.2962	1.74228	0.533525				2008-10-09	17.2824	22.9925	9.94418	0				2008-10-09	18.5061	14.1158	-0.752899	0
2008-10-10	15.9132	11.5658	4.37997	0.221164				2008-10-10	14.455	22.2383	10.2131	5.08586				2008-10-10	16.9629	12.5415	0.554321	0
2008-10-11	17.0822	11.2546	2.8519	0				2008-10-11	11.7838	17.1674	7.18109	0.557112				2008-10-11	11.5729	11.7307	3.31753	0.0178579
2008-10-12	17.048	15.1896	0.212341	0				2008-10-12	14.541	14.9375	4.90091	0				2008-10-12	16.5326	19.2548	6.67825	0
2008-10-13	17.9964	15.5967	-0.435364	0				2008-10-13	16.1498	19.1083	6.95136	0.821747				2008-10-13	16.6833	20.7421	4.48721	0
2008-10-14	17.2754	18.8385	2.21671	0				2008-10-14	12.3093	13.6017	3.31024	0.255654				2008-10-14	16.8729	23.7711	9.53116	0
2008-10-15	16.3699	20.8588	4.37393	0.0328648				2008-10-15	16.4094	14.3114	4.05133	0				2008-10-15	13.9563	24.8825	8.09039	0.419357
2008-10-16	14.3625	18.3639	5.62039	0.114198				2008-10-16	16.1665	20.1778	5.97632	0				2008-10-16	15.2261	16.0266	2.45978	0.069504
2008-10-17	16.0956	13.0333	2.70181	0.0569872				2008-10-17	16.3692	15.7796	5.05643	0				2008-10-17	16.2878	19.9938	6.0903	0.324249
2008-10-18	16.3937	18.7164	2.2507	0				2008-10-18	14.8532	14.0706	3.30514	0				2008-10-18	14.2367	20.2554	7.81839	0.593614
2008-10-19	15.3389	21.5933	7.11072	0				2008-10-19	15.877	19.5975	4.66144	0				2008-10-19	14.107	16.6662	5.82947	0.24115
2008-10-20	13.4951	20.1209	10.1593	0				2008-10-20	14.6085	18.2253	6.07791	0				2008-10-20	11.246	15.415	4.83618	0.0530342
2008-10-21	12.294	19.9019	9.49011	0.18983				2008-10-21	11.8252	16.3355	5.48853	0				2008-10-21	12.4741	17.6244	3.58829	0.0410459
2008-10-22	9.74268	16.3938	6.67908	0.413743				2008-10-22	2.31248	14.0173	4.23749	1.43063				2008-10-22	15.3347	21.7619	6.02322	0
2008-10-23	13.0072	17.6509	5.51276	0.0586975				2008-10-23	7.24448	15.5612	2.75391	0.653546				2008-10-23	15.6219	24.3063	8.35709	0.463488
2008-10-24	15.2288	20.9726	4.84689	0				2008-10-24	15.2445	19.4332	4.71027	0				2008-10-24	10.8629	8.08499	-0.932648	0.111102
2008-10-25	14.4846	20.1891	6.31613	0.207315				2008-10-25	14.6904	16.6569	4.021	0				2008-10-25	15.1005	11.9442	-3.72064	0.0393067
2008-10-26	12.9179	17.2375	5.11148	0.0298311				2008-10-26	14.4239	13.3744	1.51456	0				2008-10-26	14.5184	14.4937	-0.435638	0.0301886
2008-10-27	14.2573	23.6001	4.28058	0.0216466				2008-10-27	14.3683	16.3068	2.44467	0				2008-10-27	13.405	13.7343	-1.41571	0
2008-10-28	14.6171	21.706	4.9964	0.0166929				2008-10-28	13.8413	14.6458	2.01862	0				2008-10-28	14.5912	16.7266	0.793182	0
2008-10-29	13.1883	15.445	-2.6871	0.533145				2008-10-29	14.7744	10.8458	-2.74338	0				2008-10-29	14.6483	19.4544	1.11948	0
2008-10-30	12.8991	8.34927	-3.15888	0				2008-10-30	13.6524	17.4795	3.46429	0				2008-10-30	14.3858	18.9597	4.17062	0
2008-10-31	6.59311	8.07858	-1.07614	0.243789				2008-10-31	13.7351	16.7395	3.92575	0				2008-10-31	14.1046	18.9912	3.86813	0
2008-11-01	10.4455	7.40469	-2.97684	0.0808498				2008-11-01	13.8726	16.7842	5.95212	0				2008-11-01	14.053	20.7816	7.6619	0.0133402
2008-11-02	14.0503	14.4234	-2.31818	0				2008-11-02	13.5565	19.0477	5.95761	0.0724434				2008-11-02	13.772	22.895	9.14917	0
2008-11-03	12.7448	17.8354	1.09656	0				2008-11-03	13.4581	13.842	1.53989	0				2008-11-03	13.6274	22.7221	8.55594	0.0121122
2008-11-04	12.8514	17.0819	4.32651	0				2008-11-04	13.4647	11.9361	-1.45215	0				2008-11-04	9.21583	14.227	-2.16345	0.309443
2008-11-05	12.2733	18.5073	6.49133	0.0287283				2008-11-05	13.3535	13.162	1.06064	0				2008-11-05	6.79132	6.08914	-6.06656	0.428126
2008-11-06	11.9019	20.9961	3.35123	0				2008-11-06	12.4789	13.4401	1.72595	0				2008-11-06	9.21988	3.73566	-4.62472	0.0742483
2008-11-07	9.6045	18.9088	2.26035	0.00343278				2008-11-07	12.4063	17.542	2.28995	0				2008-11-07	11.3811	6.13327	-3.99759	0.0291054
2008-11-08	12.3432	16.1357	3.16425	0				2008-11-08	11.2787	17.6389	2.28864	1.37706				2008-11-08	10.4625	7.55707	-2.7616	0
2008-11-09	10.4746	14.5254	3.11627	0.064938				2008-11-09	5.05581	2.73624	-5.44827	0.180092				2008-11-09	10.2682	6.9509	-2.71811	0
2008-11-10	3.13233	5.9592	-1.6293	0.3919				2008-11-10	9.26806	2.97357	-7.46811	0.0643265				2008-11-10	11.5743	9.66589	-1.85763	0
2008-11-11	9.19593	5.7648	-3.15967	0				2008-11-11	13.2881	1.90323	-7.53909	0				2008-11-11	12.3709	12.6344	0.0360107	0
2008-11-12	12.0964	6.96414	-2.44315	0				2008-11-12	12.541	8.31866	-3.0029	0				2008-11-12	12.6346	14.7585	0.594757	0
2008-11-13	8.71804	6.60504	-1.66159	0				2008-11-13	11.2055	2.51779	-6.63797	0				2008-11-13	5.68526	7.8118	-1.00882	0.133816
2008-11-14	5.42989	3.12518	-1.63113	0.0468856				2008-11-14	12.1884	7.78021	-5.90653	0				2008-11-14	7.77733	6.76422	-1.80783	0.260551
2008-11-15	11.935	5.37064	-2.07916	0				2008-11-15	11.4303	7.71835	-2.56125	0				2008-11-15	8.81705	3.10486	-3.89179	0.0155018
2008-11-16	11.1314	7.06473	-2.3909	0				2008-11-16	11.0167	10.7948	-0.563141	0				2008-11-16	10.9985	10.4843	-3.70233	0.0127624
2008-11-17	10.6859	7.64841	-2.80072	0				2008-11-17	7.76796	7.59631	-1.93045	0.299866				2008-11-17	11.362	0.524811	-7.99063	0
2008-11-18	9.79263	8.37927	-1.59576	0.0269089				2008-11-18	7.57568	5.24921	-4.02847	0.035717				2008-11-18	10.9977	0.275452	-10.05	0
2008-11-19	9.73846	7.76581	-1.88046	0				2008-11-19	11.3285	1.73849	-6.14651	0				2008-11-19	10.6809	2.41678	-6.99771	0
2008-11-20	10.2326	8.12952	-2.51721	0				2008-11-20	11.417	5.72372	-4.41672	0				2008-11-20	11.2622	7.74316	-3.79123	0
2008-11-21	11.2092	8.4993	-1.51376	0				2008-11-21	11.655	6.63284	-3.15131	0				2008-11-21	11.3128	5.50839	-3.45807	0
2008-11-22	10.5466	10.526	-1.08701	0				2008-11-22	11.1645	8.46957	-1.42276	0				2008-11-22	10.1155	6.10815	-3.22116	0.0192585
2008-11-23	9.67033	7.56503	-2.11795	0.0810782				2008-11-23	10.5709	6.87613	-1.8129	0				2008-11-23	11.112	6.41336	-3.42166	0
2008-11-24	7.85266	-1.69553	-4.00452	1.36315				2008-11-24	10.5648	10.6469	-1.39569	0				2008-11-24	10.9282	9.67035	-2.9487	0
[truncated: 33,639 more rows]

## Sheet: RCP 6.0
Zhongwei
MIROC5								IPSL-CM5A-MR								GFDL-ESM2G
[truncated: 34,699 more rows]

## Sheet: RCP 8.5
Zhongwei
[truncated: 34,701 more rows]
