# Supplementary material for: Effects of temperature frequency trends on projected japonica rice (Oryza sativa L.) yield and dry matter distribution with elevated carbon dioxide
Source: PeerJ. 2021 Mar 11;9:e11027. doi: 10.7717/peerj.11027 (PMC7956007; doi:10.7717/peerj.11027)
Supplement: Supplemental Information 4 [file peerj-09-11027-s004.xlsx]

## Sheet: RCP 2.6
Yongning
MIROC5								IPSL-CM5A-MR								GFDL-ESM2G
Date	solar radiation (MJ/m2)	Tmax (°C)	Tmin (°C)	precipitation (mm)				Date	solar radiation (MJ/m2)	Tmax (°C)	Tmin (°C)	precipitation (mm)				Date	solar radiation (MJ/m2)	Tmax (°C)	Tmin (°C)	precipitation (mm)
2006-01-01	8.93085	-3.70346	-14.5243	0				2006-01-01	5.99109	3.44095	-4.58157	0				2006-01-01	8.18954	-6.54352	-16.6097	0
2006-01-02	8.02972	-2.82364	-13.6665	0				2006-01-02	2.83323	1.17618	-7.52374	0				2006-01-02	8.97075	-0.600098	-12.3599	0
2006-01-03	8.36066	-1.70059	-12.632	0				2006-01-03	7.67506	4.2471	-9.09961	0.0070506				2006-01-03	9.21585	-1.12647	-15.0114	0
2006-01-04	8.97154	-1.99722	-12.2872	0				2006-01-04	3.16419	-9.73392	-17.2604	0.074994				2006-01-04	9.48837	-9.38998	-16.8035	0
2006-01-05	8.10921	-0.766937	-11.5428	0				2006-01-05	6.71096	-11.4136	-21.2331	0				2006-01-05	8.94974	-4.08838	-15.0159	0
2006-01-06	8.12048	-1.92728	-11.4559	0				2006-01-06	8.60404	-6.52173	-18.5806	0				2006-01-06	8.65618	-0.465515	-13.3165	0
2006-01-07	8.94213	1.91745	-10.7478	0				2006-01-07	9.27909	-3.58008	-14.1273	0				2006-01-07	9.2275	1.58652	-10.2644	0
2006-01-08	9.24164	2.90518	-8.95685	0				2006-01-08	9.5344	-1.12228	-11.9794	0				2006-01-08	8.3293	0.985413	-8.94815	0
2006-01-09	8.4681	1.93808	-8.96146	0				2006-01-09	9.07721	-0.701996	-11.6765	0				2006-01-09	4.40973	-0.278839	-10.4674	0
2006-01-10	7.84133	1.61478	-10.3003	0				2006-01-10	8.84578	0.933777	-10.0215	0				2006-01-10	4.23903	-1.08078	-10.7349	0
2006-01-11	7.24753	1.12216	-9.33441	0				2006-01-11	8.59497	4.38254	-7.89151	0				2006-01-11	7.18166	-2.08432	-11.6507	0
2006-01-12	4.75796	0.594025	-9.43686	0				2006-01-12	9.38861	3.26538	-7.54248	0				2006-01-12	8.90242	-0.136597	-10.6268	0
2006-01-13	8.65219	4.40189	-10.3359	0				2006-01-13	7.48278	-0.586823	-11.0494	0				2006-01-13	5.30267	-0.777374	-10.8737	0
2006-01-14	7.50259	1.19092	-8.19815	0				2006-01-14	5.15688	-2.81928	-12.5349	0.127325				2006-01-14	4.44456	-3.00186	-12.5022	0.056565
2006-01-15	4.35429	-3.13281	-12.448	0				2006-01-15	8.80769	-0.696594	-12.8832	0				2006-01-15	5.08501	-4.35455	-13.3653	0
2006-01-16	9.06277	-6.51889	-13.3155	0				2006-01-16	3.46803	-6.15442	-15.1064	0				2006-01-16	10.0965	-2.56015	-14.3628	0
2006-01-17	2.9718	-4.29593	-10.4531	0.00771776				2006-01-17	10.0313	-1.92676	-15.228	0				2006-01-17	10.3927	3.60406	-10.7964	0
2006-01-18	9.60471	-0.0376587	-9.27124	0				2006-01-18	9.1349	3.2829	-9.27591	0				2006-01-18	10.1837	-5.30557	-16.3402	0
2006-01-19	8.96662	4.63034	-9.08609	2.26502				2006-01-19	9.86209	-4.06482	-18.0566	0				2006-01-19	10.5067	-3.03787	-16.4145	0
2006-01-20	5.90163	-7.68957	-16.9597	0.244901				2006-01-20	8.33368	-9.20337	-23.9465	0.134846				2006-01-20	10.0613	-0.761536	-9.29684	0
2006-01-21	9.81998	-8.64304	-17.698	0				2006-01-21	6.049	-11.6132	-22.9084	0.029978				2006-01-21	10.3278	0.375397	-10.633	0
2006-01-22	10.2635	-7.04654	-16.7509	0				2006-01-22	8.99562	-8.11246	-20.6261	0				2006-01-22	10.3722	1.76163	-10.6923	0
2006-01-23	10.1137	-3.05368	-16.2864	0				2006-01-23	9.04048	-4.672	-17.711	0				2006-01-23	8.22935	-2.33697	-10.7787	0
2006-01-24	10.8923	-1.92911	-13.0552	0				2006-01-24	7.67331	-2.32169	-13.8939	0				2006-01-24	10.0512	3.9621	-7.49966	0
2006-01-25	6.32622	-0.615753	-12.5982	0				2006-01-25	5.9276	-4.74173	-15.4415	0				2006-01-25	10.6433	0.808807	-8.83951	0
2006-01-26	10.8691	-0.242615	-13.4579	0				2006-01-26	11.0047	-7.25449	-18.9904	0				2006-01-26	11.2231	5.78265	-8.26199	0
2006-01-27	9.12257	3.47256	-11.7331	0				2006-01-27	11.5797	-5.29642	-17.7916	0				2006-01-27	10.8767	4.88156	-7.90826	0
2006-01-28	10.5973	4.36551	-8.7558	0				2006-01-28	10.1627	-1.71213	-13.9482	0				2006-01-28	3.19555	-1.69986	-11.3431	0
2006-01-29	5.43214	4.58627	-11.4477	0				2006-01-29	10.5185	4.49136	-10.1995	0				2006-01-29	6.0863	-5.81821	-14.7321	0
2006-01-30	11.8005	-8.61075	-13.6061	0				2006-01-30	6.25677	-0.568024	-9.92004	0.1532				2006-01-30	7.27413	-3.06149	-15.2246	0
2006-01-31	11.2584	2.12747	-15.1695	0				2006-01-31	10.0184	-2.95938	-13.6189	0				2006-01-31	11.1278	4.86832	-4.91751	0
2006-02-01	12.058	0.404388	-12.4035	0				2006-02-01	10.8499	-0.997375	-13.6335	0.0479897				2006-02-01	10.3981	6.12631	-4.58542	0.0345734
2006-02-02	10.8413	-2.25864	-12.8697	0				2006-02-02	3.73845	-3.87039	-14.2559	0				2006-02-02	7.92128	2.2789	-8.44986	0
2006-02-03	11.9123	0.577057	-13.2096	0				2006-02-03	3.14783	-7.3403	-17.2312	0				2006-02-03	12.0457	10.8709	-3.76901	0
2006-02-04	12.2556	4.53177	-12.3939	0				2006-02-04	8.96257	-4.38129	-15.4479	0.0334947				2006-02-04	11.0742	10.7437	-4.00299	0
2006-02-05	12.096	7.14786	-8.48532	0				2006-02-05	10.7099	-4.63779	-15.1147	0				2006-02-05	11.9007	5.33038	-6.08462	0
2006-02-06	10.9408	3.92389	-5.37237	0				2006-02-06	13.0856	-2.19513	-13.9099	0				2006-02-06	7.33665	5.90463	-6.61923	0
2006-02-07	12.3416	5.55795	-5.0593	0				2006-02-07	12.8541	2.75565	-9.83554	0				2006-02-07	5.69834	2.2818	-11.4948	0.0183265
2006-02-08	11.8034	8.2149	-5.17108	0				2006-02-08	12.5201	0.295959	-9.72299	0				2006-02-08	12.0314	-5.4306	-15.4793	0
2006-02-09	10.0076	7.74539	-4.49948	0				2006-02-09	13.2497	4.4714	-8.86069	0				2006-02-09	12.9441	-3.98087	-15.2671	0
2006-02-10	10.7007	8.97275	-4.19717	0.0044436				2006-02-10	12.6495	9.07608	-6.40503	0				2006-02-10	13.6269	-4.19015	-15.0606	0
2006-02-11	9.21228	8.15247	-4.035	0				2006-02-11	12.694	10.1992	-4.8682	0				2006-02-11	13.5919	-3.52231	-16.0769	0
2006-02-12	12.1547	9.41037	-3.79718	0				2006-02-12	12.6996	9.6293	-3.73618	0				2006-02-12	13.5075	-0.171875	-14.4546	0
2006-02-13	12.2261	9.11404	-1.3569	0				2006-02-13	2.00585	7.15231	-3.42172	1.99095				2006-02-13	13.7029	3.1264	-10.4505	0
2006-02-14	9.25346	8.45056	-1.67215	0.0544745				2006-02-14	12.1149	7.44388	-3.43198	0				2006-02-14	13.9691	4.79422	-6.83646	0
2006-02-15	3.65572	6.57553	-2.10446	0.0117421				2006-02-15	12.8978	7.88199	-3.7507	0				2006-02-15	13.8597	3.84732	-7.40741	0
2006-02-16	11.341	8.11929	-3.23441	0.0307736				2006-02-16	9.64521	9.43423	-9.59775	1.47286				2006-02-16	13.2533	5.30246	-4.29336	0
2006-02-17	9.36242	6.98245	-2.74393	0				2006-02-17	13.5272	-5.93167	-14.7393	0				2006-02-17	0.776867	1.08731	-5.45154	0.623642
2006-02-18	12.2705	8.22415	-3.1665	0				2006-02-18	13.9047	-6.04474	-17.5336	0				2006-02-18	14.0424	6.88763	-5.12811	0
2006-02-19	8.31432	10.5022	-3.47879	0.0140795				2006-02-19	13.4379	-5.8941	-17.425	0				2006-02-19	11.5279	3.54236	-8.37973	0.0596035
2006-02-20	0.848424	7.4097	-2.14594	0.136265				2006-02-20	15.9582	-2.31064	-16.958	0				2006-02-20	14.3327	1.44022	-10.9072	0
2006-02-21	11.8055	7.72195	-3.04373	0.0218222				2006-02-21	14.4863	-0.69577	-11.7549	0				2006-02-21	13.1308	2.1521	-7.35416	0.010944
2006-02-22	13.79	12.6991	-1.69525	0				2006-02-22	14.7737	5.23059	-8.08603	0				2006-02-22	8.00474	1.64734	-7.79715	0.0294422
2006-02-23	10.1957	9.17071	-2.83194	0				2006-02-23	14.6791	6.57754	-5.36533	0				2006-02-23	11.8883	0.277679	-8.77817	0.0135291
2006-02-24	11.4216	4.86987	-3.0394	0.0700429				2006-02-24	11.439	6.2959	-4.65949	0				2006-02-24	10.7573	2.09699	-10.7447	0
2006-02-25	6.27698	4.38071	-3.11047	0.924415				2006-02-25	14.6574	7.1199	-5.20163	0				2006-02-25	15.1938	6.5535	-4.77219	0
2006-02-26	5.8831	1.74734	-4.60745	0.24969				2006-02-26	15.0557	11.243	-3.77835	0				2006-02-26	12.6423	3.51895	-12.399	0.0173061
2006-02-27	8.24501	0.690491	-3.51245	3.56059				2006-02-27	15.1121	12.8652	0.747406	0				2006-02-27	15.0742	-3.7327	-15.2488	0
2006-02-28	10.6069	1.73947	-5.33997	0.0084161				2006-02-28	16.1088	10.321	-1.19369	0.0509075				2006-02-28	17.0791	-5.32028	-15.8737	0
2006-03-01	16.7192	3.71097	-6.2431	0				2006-03-01	10.7042	4.98056	-5.27081	0.0216131				2006-03-01	17.6296	-0.247345	-15.4507	0
2006-03-02	12.6217	4.39926	-3.98715	0				2006-03-02	5.62089	4.17313	-5.67581	1.84473				2006-03-02	18.0933	3.30463	-11.0205	0
2006-03-03	4.53986	3.88736	-3.3367	0.382314				2006-03-03	16.3622	6.18536	-6.0806	0				2006-03-03	18.0942	10.1965	-1.06479	0
2006-03-04	5.30624	3.94125	-5.61169	0.821289				2006-03-04	16.7929	8.44717	-4.08749	0				2006-03-04	15.6082	8.18466	-8.035	0.0178443
2006-03-05	18.8906	2.36844	-7.05215	0				2006-03-05	16.8024	12.3184	-2.7272	0				2006-03-05	17.2233	-1.15384	-14.2601	0
2006-03-06	18.4207	11.6295	-5.16321	0				2006-03-06	16.8926	12.6113	-3.83401	0.00651951				2006-03-06	17.0937	-1.55554	-15.2295	0
2006-03-07	11.989	9.35074	-1.5495	0				2006-03-07	18.5276	0.878265	-7.7453	0				2006-03-07	18.5164	3.09543	-10.7494	0
2006-03-08	18.1178	12.999	-1.96704	0				2006-03-08	18.8106	1.74155	-8.2164	0				2006-03-08	18.2265	-0.732727	-11.2833	0
2006-03-09	18.3704	17.67	-0.204102	0				2006-03-09	19.1852	4.61612	-7.11926	0				2006-03-09	19.5004	7.01688	-5.76184	0
2006-03-10	16.6062	14.8109	0.152954	0				2006-03-10	18.997	8.90591	-3.85934	0				2006-03-10	16.454	8.49979	-1.5217	0
2006-03-11	12.426	9.21139	-0.577301	0.0120765				2006-03-11	16.3108	10.7925	-2.11047	0				2006-03-11	18.1584	12.4386	1.13538	0
2006-03-12	17.8754	14.6739	-1.08804	0.00676854				2006-03-12	17.6799	13.0246	-1.45825	0				2006-03-12	17.6911	13.8454	-2.56442	0.15104
2006-03-13	17.7939	15.4985	1.71728	0				2006-03-13	12.2865	8.40869	-1.95358	0				2006-03-13	18.423	7.49127	-4.8353	0.0238421
2006-03-14	18.4057	17.736	1.73254	0.0113733				2006-03-14	5.20285	7.90714	-1.01907	0.00954541				2006-03-14	12.8197	16.4718	4.73972	0.0280734
2006-03-15	19.4346	17.8056	5.44629	0				2006-03-15	11.8539	6.64075	-4.6589	0.732413				2006-03-15	6.13204	6.19498	-4.81686	0.257129
2006-03-16	18.7751	19.6852	5.26248	0				2006-03-16	20.0545	7.36606	-5.85461	0				2006-03-16	12.3019	2.60892	-7.25824	0.0389317
2006-03-17	18.3077	22.1888	6.93652	0				2006-03-17	19.2658	11.5548	-0.589081	0				2006-03-17	10.9876	8.08585	-0.690094	0.0206189
2006-03-18	17.1216	24.3666	10.6408	0.160584				2006-03-18	19.5754	12.3012	1.34674	0				2006-03-18	17.2627	19.455	5.68921	0
2006-03-19	14.3568	15.9198	5.37363	0.0377822				2006-03-19	10.4695	12.6685	2.01672	0				2006-03-19	17.5521	13.922	3.91266	0
2006-03-20	16.2984	14.214	3.94928	0.58807				2006-03-20	15.8039	11.9545	1.31723	0.0316821				2006-03-20	17.4525	14.1024	-0.24231	0.0255817
2006-03-21	3.83319	11.7466	2.79767	6.29964				2006-03-21	19.6623	13.0547	2.75217	0				2006-03-21	19.9835	8.91611	-0.932007	0
2006-03-22	1.30905	3.88828	0.0143738	1.34322				2006-03-22	12.466	16.9298	4.8165	0.146937				2006-03-22	17.7589	10.8013	-0.0892639	0.0185243
2006-03-23	9.76034	4.93133	-0.925415	0.0991082				2006-03-23	17.0598	15.1418	4.8569	0.10399				2006-03-23	15.7881	12.7274	2.50235	0.028713
2006-03-24	21.7703	5.80466	-4.10538	0				2006-03-24	10.7547	10.3518	0.788025	0.349239				2006-03-24	20.3031	11.7956	-2.64841	0.0516988
2006-03-25	23.1191	11.8544	-4.20435	0				2006-03-25	20.3309	13.8781	1.74158	0				2006-03-25	20.3519	6.46475	-4.30502	0.0264392
2006-03-26	21.7622	16.1933	1.1441	0.0184795				2006-03-26	21.2744	15.0695	1.8999	0				2006-03-26	22.4178	10.8791	-1.9711	0
2006-03-27	17.9215	17.4077	5.65799	0				2006-03-27	18.1926	18.0493	5.04089	0				2006-03-27	21.9083	15.3958	2.87704	0
2006-03-28	21.9985	23.0583	5.00934	0				2006-03-28	21.0889	21.0988	5.11612	0				2006-03-28	22.0529	17.8299	4.92209	0
2006-03-29	8.95614	6.56213	0.672669	0				2006-03-29	21.5122	20.6826	3.58688	0				2006-03-29	21.8983	18.839	7.18048	0
2006-03-30	19.6677	13.3235	-0.250153	0				2006-03-30	9.56964	8.32376	-1.02731	0.208577				2006-03-30	22.5356	18.1419	0.339172	0
2006-03-31	12.2788	14.0468	2.76801	0				2006-03-31	16.6024	13.0368	0.668854	0				2006-03-31	21.4454	10.9267	-0.112213	0
2006-04-01	19.9823	18.0309	5.99811	0.0748325				2006-04-01	23.6992	14.6338	2.21381	0				2006-04-01	15.7713	16.4857	4.18277	0
2006-04-02	14.2402	14.1256	2.07736	0.0631761				2006-04-02	19.3822	10.8439	1.8829	0.145503				2006-04-02	22.4266	16.6802	6.58685	0
2006-04-03	19.6795	13.3742	1.94189	0				2006-04-03	16.8609	14.1743	1.44803	0				2006-04-03	22.4435	20.919	-0.409759	0.0427006
2006-04-04	17.7399	16.6039	4.23447	0.0243451				2006-04-04	18.9685	15.6252	4.59396	0.217926				2006-04-04	10.4067	4.58157	-3.35892	0.766115
2006-04-05	14.031	15.353	3.72513	0.0452879				2006-04-05	23.6541	14.2371	2.97775	0				2006-04-05	14.3267	4.04376	-3.93103	0.0761195
2006-04-06	24.3662	18.2711	3.08099	0				2006-04-06	23.0194	20.6097	7.38916	0				2006-04-06	23.6395	9.72897	-1.65543	0
2006-04-07	24.0102	17.285	3.89789	0				2006-04-07	15.318	20.4052	8.28226	0				2006-04-07	23.1515	19.586	4.00723	0
2006-04-08	23.118	22.769	6.35001	0.1422				2006-04-08	7.19403	14.7439	-3.27817	3.06583				2006-04-08	23.0439	19.2805	5.57364	0
2006-04-09	20.6778	21.3949	10.5222	0.255002				2006-04-09	24.5496	2.54172	-5.87714	0				2006-04-09	24.3319	19.2077	6.58981	0
2006-04-10	6.75782	14.7003	8.34991	1.97776				2006-04-10	23.8366	9.85062	0.169403	0				2006-04-10	22.7821	19.5272	9.24554	0
2006-04-11	21.3455	17.9273	7.52414	0.0733305				2006-04-11	9.26308	9.43369	1.91873	1.22742				2006-04-11	16.4523	21.9979	9.75931	0.153799
2006-04-12	23.4389	20.1631	7.78009	0.104232				2006-04-12	12.1701	10.9486	-0.0785828	0.328565				2006-04-12	18.1516	17.5897	3.61447	0
2006-04-13	24.8159	22.5303	8.65741	0				2006-04-13	23.591	14.827	5.07022	0				2006-04-13	23.6828	11.1195	0.805267	0
2006-04-14	22.7195	25.4883	13.0949	0.13108				2006-04-14	21.4433	18.8392	6.37518	0				2006-04-14	24.1076	16.1626	3.44962	0.0589006
2006-04-15	9.20593	19.0865	11.9219	0.990021				2006-04-15	24.1975	19.9752	7.62091	0				2006-04-15	5.45876	12.1791	3.9762	0.413582
2006-04-16	5.64088	15.5622	9.23373	10.8123				2006-04-16	25.5917	22.1588	9.55426	0				2006-04-16	22.8696	19.2848	6.24533	0
2006-04-17	8.16406	12.9975	6.37701	0				2006-04-17	20.3403	22.7002	9.8793	0.0176492				2006-04-17	22.6893	23.6427	10.9173	0
2006-04-18	24.468	21.4409	7.45428	0				2006-04-18	24.3433	22.4388	9.68192	0				2006-04-18	22.2986	28.8048	14.3979	0
2006-04-19	24.0243	23.7389	9.9751	0				2006-04-19	22.3217	22.9355	8.48502	0.209726				2006-04-19	20.2075	22.7802	11.9395	0.0268809
2006-04-20	21.8192	24.086	13.078	0				2006-04-20	21.3322	12.7882	5.82724	0				2006-04-20	20.8284	22.5553	10.2996	0
2006-04-21	23.0764	21.284	8.44373	17.0325				2006-04-21	23.9698	16.4265	3.10626	0				2006-04-21	17.9476	20.8722	10.5638	0
2006-04-22	9.54806	10.1881	3.63043	0.0323837				2006-04-22	25.7659	11.238	0.493042	0				2006-04-22	24.9378	24.561	12.2248	0
2006-04-23	26.2966	11.4924	2.47559	0				2006-04-23	25.8601	9.07858	0.485352	0				2006-04-23	21.01	25.2161	14.3404	0.424535
2006-04-24	24.8605	15.19	3.91852	0				2006-04-24	26.0421	14.3274	3.7012	0				2006-04-24	5.99562	16.5951	10.2472	0.230959
2006-04-25	21.1098	15.5495	5.46463	0				2006-04-25	26.8373	20.4587	8.09399	0				2006-04-25	18.1273	16.7829	6.5976	0
2006-04-26	25.5571	20.5836	6.49826	0.211072				2006-04-26	21.6582	20.6927	9.86002	0				2006-04-26	26.2566	22.0255	10.4123	0
2006-04-27	26.9183	16.9753	4.65747	0				2006-04-27	19.7737	23.1262	11.0766	0.0128572				2006-04-27	25.0312	27.7827	14.3073	0.182485
2006-04-28	27.5368	15.9082	5.16208	0				2006-04-28	18.51	20.1939	9.06406	1.33492				2006-04-28	13.1848	18.4478	13.5531	4.89038
2006-04-29	24.4648	24.0125	8.20209	0.0447725				2006-04-29	23.7083	18.2118	7.22516	0				2006-04-29	16.0971	16.6401	10.4505	0
2006-04-30	15.6167	18.8478	9.01071	0.237675				2006-04-30	27.3647	19.4806	9.53592	0				2006-04-30	22.6079	19.5927	10.4255	0.140342
2006-05-01	26.7784	18.3233	8.125	0				2006-05-01	26.2825	26.4647	13.2964	0				2006-05-01	25.9996	27.804	14.8693	0.0381535
2006-05-02	25.8447	21.3136	8.71686	0				2006-05-02	16.0314	23.8766	11.7853	0				2006-05-02	25.6471	31.1081	16.9523	0.104812
2006-05-03	27.5943	25.3137	12.8919	0				2006-05-03	19.2156	25.9524	12.581	0.153479				2006-05-03	25.4465	29.0724	18.4764	0.0759417
2006-05-04	25.512	26.1806	15.2924	0				2006-05-04	17.5818	15.557	5.49521	0.622328				2006-05-04	22.7967	28.4854	19.13	0
2006-05-05	20.747	27.7716	16.9008	8.80591				2006-05-05	27.3733	15.0072	5.69775	0				2006-05-05	11.6571	24.3792	9.09061	1.96399
2006-05-06	18.1521	25.2762	14.465	0.0672944				2006-05-06	27.2742	21.4741	10.2146	0				2006-05-06	20.7206	17.0791	7.13962	0
2006-05-07	17.7884	20.7463	12.6859	1.84697				2006-05-07	27.0251	26.0395	12.6857	1.07394				2006-05-07	26.8674	18.3936	10.2094	0
2006-05-08	19.5909	23.2268	13.0446	8.22205				2006-05-08	26.9928	15.9796	9.57251	0				2006-05-08	25.5732	23.6354	13.2788	0
2006-05-09	14.3633	14.4151	9.02609	1.82753				2006-05-09	17.8309	21.8351	11.119	0				2006-05-09	25.9788	26.9762	14.2586	0.0571121
2006-05-10	28.9073	15.9933	7.97018	0				2006-05-10	21.5909	22.0401	11.1903	0.137247				2006-05-10	8.75914	18.3117	12.4965	1.56215
2006-05-11	27.3121	17.8545	6.40655	0				2006-05-11	27.7152	18.6228	8.8775	0				2006-05-11	9.79152	18.2482	11.7518	0.114547
2006-05-12	25.8026	21.5622	8.90414	0				2006-05-12	27.3885	22.133	12.4775	0				2006-05-12	18.3993	19.1493	10.463	0.304235
2006-05-13	26.7504	24.6209	12.4166	0				2006-05-13	27.9127	25.1198	13.2237	0				2006-05-13	7.80932	16.3914	11.2922	0.610255
2006-05-14	22.1026	22.6934	12.9185	0				2006-05-14	26.7872	29.6418	15.4626	0				2006-05-14	12.5765	18.0014	11.0617	1.21616
2006-05-15	20.6877	23.8738	12.4061	7.9289				2006-05-15	16.7908	26.0176	14.3856	0.122264				2006-05-15	8.12239	13.1339	8.80353	2.02139
2006-05-16	20.0342	20.49	11.748	0				2006-05-16	28.7699	27.5629	15.4001	0				2006-05-16	23.1031	18.7948	9.7789	0.607734
2006-05-17	28.2452	24.0788	13.0807	17.3926				2006-05-17	21.4981	28.7321	17.0191	0.0780221				2006-05-17	24.1278	21.2262	10.4045	0.0959243
2006-05-18	28.5148	26.7663	15.4273	0				2006-05-18	26.6994	28.4724	16.9515	0				2006-05-18	27.1736	22.0469	12.6722	0.0629787
2006-05-19	22.7243	27.5937	15.8227	1.92785				2006-05-19	24.5232	34.6999	18.5557	0				2006-05-19	12.8546	18.6105	11.8409	1.02979
2006-05-20	2.69578	17.0854	13.9407	12.3979				2006-05-20	25.2907	36.9909	20.9981	0				2006-05-20	12.4939	18.2895	12.3235	2.15338
2006-05-21	9.67565	20.8467	14.8133	4.61334				2006-05-21	22.5107	38.2165	21.6627	0.0599755				2006-05-21	14.352	16.977	11.2175	0.123826
2006-05-22	24.35	23.3365	16.7406	0.327101				2006-05-22	16.3162	24.5954	14.2393	0.396549				2006-05-22	19.8257	21.0404	13.1462	0.156098
2006-05-23	12.5824	17.9181	14.426	1.56972				2006-05-23	8.6003	17.9844	12.375	0.348971				2006-05-23	8.64816	16.9764	12.7188	2.40448
2006-05-24	25.6967	20.287	14.2493	0.110299				2006-05-24	17.7237	21.844	14.2891	0				2006-05-24	11.0713	17.1006	11.9716	5.99066
2006-05-25	14.472	17.4244	12.3284	0.67329				2006-05-25	12.9417	21.8847	14.4911	0				2006-05-25	14.1679	16.408	9.99854	0.245873
2006-05-26	19.3382	21.3526	13.9451	0.392031				2006-05-26	17.5851	23.7695	15.1916	0				2006-05-26	26.6275	22.4709	12.7188	0.0333005
2006-05-27	29.443	27.7722	14.7487	0				2006-05-27	14.5191	22.2425	13.872	0.318028				2006-05-27	28.082	24.3023	13.8219	0.0275338
2006-05-28	21.4242	21.9395	12.5645	0.998916				2006-05-28	18.7508	24.0057	14.2806	0.00152965				2006-05-28	27.2829	25.7589	14.7337	0
2006-05-29	27.7694	22.1553	12.3578	0				2006-05-29	8.52067	20.3866	12.5199	3.82206				2006-05-29	27.5756	24.612	13.7939	0.0295855
2006-05-30	27.3725	25.2065	14.0845	0.0559893				2006-05-30	14.401	20.6384	13.0521	0.928331				2006-05-30	27.4358	24.1417	15.1332	0.0752781
2006-05-31	28.3203	27.8443	17.2707	0				2006-05-31	20.2599	28.116	18.1846	0.0766342				2006-05-31	14.9695	21.1118	13.373	0.812694
2006-06-01	27.5352	31.1274	19.7164	0				2006-06-01	24.761	28.6317	16.6194	0				2006-06-01	13.439	19.485	13.6904	0.643165
2006-06-02	23.9071	26.3239	13.6284	0.928671				2006-06-02	28.5364	30.943	19.696	0				2006-06-02	23.8581	25.7039	15.4592	0.154975
2006-06-03	25.6682	22.1139	14.1285	0.453749				2006-06-03	23.5121	31.8721	19.0289	0.0970318				2006-06-03	25.6809	24.8963	15.7285	0
2006-06-04	6.12682	20.6017	17.6892	7.03501				2006-06-04	29.1211	30.3911	19.7512	0				2006-06-04	25.5611	25.8163	16.7666	0.137325
2006-06-05	15.6461	19.3347	16.2443	1.27679				2006-06-05	15.8449	27.5956	18.5546	0.366942				2006-06-05	25.7143	27.5848	15.811	0.010062
2006-06-06	25.1653	27.559	18.2209	0.0528329				2006-06-06	24.5865	27.9069	18.5747	0.151121				2006-06-06	26.7545	25.7959	15.8469	0.0250717
2006-06-07	25.8665	29.3472	17.0604	11.9631				2006-06-07	26.11	25.9109	15.9303	0				2006-06-07	9.42278	19.5193	13.9623	0.717826
2006-06-08	22.6902	23.5381	15.4387	0.131736				2006-06-08	29.4807	23.8835	14.7962	0				2006-06-08	24.5217	24.4384	15.0946	0.0411864
2006-06-09	23.0489	25.0317	15.4069	0.241362				2006-06-09	27.7272	24.9807	15.4503	0.464776				2006-06-09	28.4536	29.8554	18.2385	0
2006-06-10	26.9692	25.9139	17.0932	0.189299				2006-06-10	23.2352	25.1475	15.2864	0.305475				2006-06-10	28.6641	29.9746	19.175	0
2006-06-11	15.4563	20.8336	15.0246	0.899442				2006-06-11	25.5359	29.2098	18.3236	0.118873				2006-06-11	21.5648	28.3644	19.0015	0.419771
2006-06-12	28.983	25.8363	16.7153	0				2006-06-12	22.103	26.6512	17.8207	0				2006-06-12	27.3784	29.336	19.4948	0
2006-06-13	27.3234	27.2896	17.179	0				2006-06-13	27.0018	26.4362	17.6422	1.3403				2006-06-13	28.6641	31.6207	20.2952	0
2006-06-14	21.8887	25.889	18.6299	0.0363623				2006-06-14	27.3019	26.1402	17.066	0.0611586				2006-06-14	26.8886	30.8786	19.9377	0.0340003
2006-06-15	17.7903	23.5361	16.1157	0.151706				2006-06-15	30.3241	27.3633	17.0462	0.138057				2006-06-15	25.9536	30.3518	20.0835	0.508483
2006-06-16	29.2613	28.2441	17.0648	0.0317787				2006-06-16	29.4701	26.6831	16.1577	0.0444264				2006-06-16	26.3992	32.3825	18.2534	0
2006-06-17	28.8035	29.9092	19.2235	0				2006-06-17	29.6718	27.6196	17.6599	0.0137085				2006-06-17	28.0103	27.9016	18.0453	0
2006-06-18	19.9714	27.2881	20.0586	1.554				2006-06-18	27.617	28.5498	18.0081	0				2006-06-18	26.1156	28.1271	19.988	0.227726
2006-06-19	21.6172	26.6585	20.1883	0.463727				2006-06-19	23.2561	28.6023	18.6258	0				2006-06-19	20.9216	28.481	19.5869	1.033
2006-06-20	7.49311	20.833	14.7721	14.5164				2006-06-20	25.93	27.5382	18.3818	0				2006-06-20	26.6432	27.8331	18.1057	0
2006-06-21	26.3892	23.6846	16.7422	0				2006-06-21	26.3041	29.2446	18.9071	0				2006-06-21	29.0428	28.9385	18.4607	0
2006-06-22	27.7688	27.2114	18.0703	0				2006-06-22	29.5968	32.471	19.5757	0				2006-06-22	28.1782	29.7605	20.858	0
2006-06-23	28.0497	29.5347	20.2325	0				2006-06-23	26.4439	33.5104	21.8549	0				2006-06-23	28.0825	32.1911	21.7323	0.146228
2006-06-24	27.1762	29.482	19.5551	0.724576				2006-06-24	27.5568	31.627	21.2062	0				2006-06-24	28.696	30.6917	21.6512	0.291717
2006-06-25	27.6577	28.7407	18.1873	0				2006-06-25	28.1504	32.8475	20.9826	0				2006-06-25	26.3959	29.7429	20.4848	0
2006-06-26	27.2301	28.5018	18.2687	0				2006-06-26	27.6028	33.7715	22.9695	0				2006-06-26	25.102	27.5975	17.6159	0.492925
2006-06-27	29.6053	29.4528	18.4513	0				2006-06-27	28.6688	32.8757	21.9279	0				2006-06-27	26.274	25.6687	16.346	0.0768752
2006-06-28	23.6624	29.315	19.8507	2.66512				2006-06-28	27.8844	31.9509	21.6641	0				2006-06-28	27.6523	23.0114	14.3363	0.106653
2006-06-29	1.91727	20.3127	18.0289	2.59012				2006-06-29	27.4044	34.9293	22.1844	0				2006-06-29	28.617	24.2736	14.8983	0
2006-06-30	7.40161	20.9008	18.2208	6.48765				2006-06-30	27.0581	37.3012	22.9494	0				2006-06-30	28.163	25.3626	15.2663	0
2006-07-01	12.9301	19.2633	17.5625	0.229639				2006-07-01	20.8265	34.1877	21.7242	2.15846				2006-07-01	26.4769	24.5302	16.5426	0.240641
2006-07-02	28.113	26.8768	17.8072	0				2006-07-02	2.69739	22.8731	17.6096	12.475				2006-07-02	24.9245	24.8878	17.7666	0
2006-07-03	27.1295	25.5526	16.1639	0				2006-07-03	10.9447	21.1183	15.4967	4.47049				2006-07-03	24.1125	25.7775	18.793	0.631324
2006-07-04	28.045	26.5229	17.0212	0				2006-07-04	24.1839	28.5037	19.7193	1.72209				2006-07-04	12.627	23.9402	18.6104	3.51647
2006-07-05	27.6115	29.115	18.5918	0				2006-07-05	20.273	26.3736	18.719	0.190297				2006-07-05	18.7442	25.8589	18.6567	0
2006-07-06	27.485	30.5229	21.1821	0				2006-07-06	18.303	24.7385	18.1237	0.237614				2006-07-06	14.9767	26.9638	17.7272	0.156178
2006-07-07	18.1598	26.6537	21.6554	2.30924				2006-07-07	26.3201	26.8705	17.7146	0.553685				2006-07-07	27.0423	29.0001	20.0149	0
2006-07-08	9.86344	21.0865	17.5477	5.18394				2006-07-08	26.6748	28.4619	17.2385	0.0204125				2006-07-08	25.0276	29.4427	20.3073	0.0508731
2006-07-09	22.7091	24.4933	17.0482	1.27956				2006-07-09	24.9904	30.9079	18.8856	0.128998				2006-07-09	27.0729	31.7558	22.1249	0.509764
2006-07-10	22.1088	27.5012	18.5549	0.460566				2006-07-10	23.8727	31.053	19.0742	0.214613				2006-07-10	19.1029	28.3893	19.5857	1.17857
2006-07-11	14.644	24.4746	17.6359	0				2006-07-11	21.2183	33.985	19.8967	0				2006-07-11	11.6461	25.3405	19.0882	2.66882
2006-07-12	28.3164	29.9656	18.1797	0				2006-07-12	11.4133	24.1439	16.9027	10.5205				2006-07-12	23.8373	28.4723	20.7085	0.240533
2006-07-13	29.1757	32.2913	18.9445	0				2006-07-13	15.8879	23.912	18.2345	0.543822				2006-07-13	20.0933	27.5454	18.5083	0.295608
2006-07-14	26.9386	32.7903	19.8772	0.233712				2006-07-14	27.0053	29.936	16.6664	0				2006-07-14	26.6564	29.4411	19.5867	0
2006-07-15	27.6686	32.4775	21.0801	0.0713492				2006-07-15	28.4915	30.8014	19.6814	0.0443681				2006-07-15	27.8971	29.3579	19.7691	0
2006-07-16	27.5639	31.5996	22.3345	0.129204				2006-07-16	28.0069	32.9035	20.6122	0				2006-07-16	26.5548	31.4051	21.8731	0.445855
2006-07-17	26.9217	29.4112	19.5507	0.128733				2006-07-17	19.4481	33.7257	21.9674	0				2006-07-17	27.972	31.9342	21.5019	0.0907972
2006-07-18	24.3774	27.5723	20.8699	0				2006-07-18	27.0779	34.1086	19.9552	0				2006-07-18	25.4257	30.8302	22.0912	0
2006-07-19	23.137	28.6262	21.4618	0.0943945				2006-07-19	27.2879	34.1952	22.6536	0				2006-07-19	24.8972	29.9355	21.7141	0.219189
2006-07-20	23.0195	29.9491	21.8362	1.12057				2006-07-20	21.1014	35.3209	22.5486	1.09115				2006-07-20	18.5804	27.2371	20.4494	2.9604
2006-07-21	2.00758	21.4839	12.5815	0.819902				2006-07-21	11.7977	30.2185	21.45	0.687069				2006-07-21	27.7029	27.8182	17.4824	0
2006-07-22	25.2878	21.5794	12.9135	0				2006-07-22	22.6677	32.1805	21.7874	0.589488				2006-07-22	27.3447	28.4314	18.4709	0
2006-07-23	29.0499	25.6258	14.6862	0				2006-07-23	22.7356	33.4608	21.7784	0				2006-07-23	27.7453	29.9615	20.5436	0
2006-07-24	25.6109	27.3756	18.5465	0.193947				2006-07-24	19.1647	32.5707	22.391	0				2006-07-24	26.7793	30.0973	21.2372	0
2006-07-25	19.8173	24.1339	18.1816	3.21983				2006-07-25	17.6258	31.4877	22.61	0.638377				2006-07-25	24.0077	29.2931	21.5735	0.107487
2006-07-26	24.6984	25.3824	18.5041	0.736748				2006-07-26	15.0085	30.7837	19.574	0				2006-07-26	12.2048	25.1902	19.4609	2.41905
2006-07-27	23.0812	25.4191	19.1458	1.56449				2006-07-27	27.1043	32.5128	20.1138	0				2006-07-27	25.4307	28.192	19.0353	0
2006-07-28	23.0128	23.9333	18.2019	1.1258				2006-07-28	22.4733	31.8518	18.4451	0.0487716				2006-07-28	27.0469	31.6868	18.0704	0
2006-07-29	19.8441	24.7354	18.2991	0				2006-07-29	23.741	28.4554	18.4541	0.310776				2006-07-29	27.9245	29.2711	19.3661	0
2006-07-30	19.9895	23.5375	18.1924	8.65139				2006-07-30	21.7017	30.5986	19.5763	0				2006-07-30	27.4531	31.0482	19.6114	0
2006-07-31	23.2204	26.5695	19.4901	1.08509				2006-07-31	23.4366	29.5107	19.0403	0.0587194				2006-07-31	24.0587	30.8327	19.868	0.109325
2006-08-01	19.905	26.6307	20.4312	0.063992				2006-08-01	21.1866	26.732	19.4936	0.791424				2006-08-01	10.617	22.6202	17.1966	9.67017
2006-08-02	22.3811	29.8809	21.1245	0				2006-08-02	21.5797	28.9005	19.6289	0.516046				2006-08-02	19.4726	26.7422	16.6126	0.593556
2006-08-03	17.1924	26.1889	22.1008	12.269				2006-08-03	17.3978	25.4623	18.6372	14.126				2006-08-03	26.2969	27.7296	21.474	0
2006-08-04	13.094	22.7165	17.9474	11.718				2006-08-04	14.752	24.0313	17.7519	11.6094				2006-08-04	19.4789	28.1046	20.4715	1.21531
2006-08-05	24.0375	23.9733	17.0198	0.285375				2006-08-05	19.1541	24.0635	16.9478	1.94083				2006-08-05	19.1816	25.7913	16.2349	0
2006-08-06	25.817	24.8353	17.2017	0				2006-08-06	23.5017	26.4928	17.635	0.605053				2006-08-06	26.4566	25.9991	17.2908	0
2006-08-07	24.0141	26.4926	17.6587	0				2006-08-07	17.4875	24.7615	18.2015	1.02442				2006-08-07	17.4776	25.1754	17.651	1.45312
2006-08-08	25.9155	28.0505	18.421	0				2006-08-08	24.9453	27.7033	17.638	0.0723361				2006-08-08	25.5843	22.9841	12.9927	0
2006-08-09	24.5715	28.5502	19.2996	0				2006-08-09	22.9328	27.9859	17.2701	0.987786				2006-08-09	27.6711	24.212	13.195	0
2006-08-10	25.0451	28.7813	19.7615	0				2006-08-10	23.7014	28.0192	17.3457	1.05				2006-08-10	19.4648	21.5363	13.4099	0
2006-08-11	21.083	27.9473	20.134	0.159194				2006-08-11	22.2194	28.8318	17.4501	1.92571				2006-08-11	25.9398	24.4185	14.9021	0
2006-08-12	20.6438	25.9597	19.9458	0				2006-08-12	5.63002	20.8127	14.0378	0.671915				2006-08-12	26.8989	25.9002	16.8563	0
2006-08-13	23.7026	27.6966	19.8525	0.731531				2006-08-13	26.1679	27.44	13.8038	0				2006-08-13	26.4619	31.3047	18.8355	0.0818586
2006-08-14	22.7083	28.6881	20.4264	0.238923				2006-08-14	25.4189	21.7988	13.718	0				2006-08-14	24.8929	29.9626	16.9354	0
2006-08-15	20.7919	28.3047	19.5089	0.315777				2006-08-15	26.1766	25.7912	14.5761	0				2006-08-15	25.7624	29.8596	18.4915	0
2006-08-16	22.1156	26.6369	18.894	0				2006-08-16	16.5323	24.6114	14.7843	3.76917				2006-08-16	23.8046	29.9016	18.6537	0
2006-08-17	21.8144	27.1164	19.1745	0.234108				2006-08-17	3.78537	17.7489	13.7109	2.64382				2006-08-17	24.1636	28.9729	17.9782	0
2006-08-18	19.2079	27.6876	19.8499	0.0495751				2006-08-18	18.9113	21.4463	14.8222	1.1979				2006-08-18	23.6283	28.6743	18.9616	0.0938009
2006-08-19	9.76106	22.1078	18.271	6.61589				2006-08-19	16.2198	23.7481	16.3253	0.0394024				2006-08-19	15.016	26.0334	18.7153	0.0182098
2006-08-20	3.63174	18.4392	17.0626	15.3452				2006-08-20	16.8449	24.0641	15.8255	0.105436				2006-08-20	23.5113	26.9479	17.2876	0
2006-08-21	7.82025	17.5584	14.7218	2.38398				2006-08-21	24.4586	25.8449	14.5574	0.0851879				2006-08-21	26.4983	28.5692	15.2697	0
2006-08-22	12.0088	22.9463	15.205	0.179751				2006-08-22	24.8202	26.0623	14.4089	0				2006-08-22	25.3628	32.1062	18.4392	0
2006-08-23	25.8891	28.0405	15.8534	0				2006-08-23	24.4468	25.4847	15.8045	0				2006-08-23	26.0438	32.323	17.9342	0
2006-08-24	24.7336	29.2761	16.6257	0				2006-08-24	6.88667	19.3768	13.9973	4.21378				2006-08-24	25.1073	33.4442	20.2883	0
2006-08-25	14.21	26.4402	18.4935	1.45847				2006-08-25	20.8911	21.5656	14.634	0				2006-08-25	14.7665	29.1333	18.8887	0
2006-08-26	12.6663	22.831	18.3255	7.65111				2006-08-26	18.5049	24.3022	14.961	0				2006-08-26	21.7863	30.3688	18.6259	0
2006-08-27	21.0337	26.3586	15.0871	0.381436				2006-08-27	17.0184	23.7328	13.5826	0				2006-08-27	20.5791	30.0977	15.872	0
2006-08-28	11.7102	22.9623	15.8809	1.3589				2006-08-28	23.4904	23.6265	13.7952	0				2006-08-28	23.0111	28.5411	16.8593	0
2006-08-29	9.50052	24.7663	16.5172	0				2006-08-29	24.2026	24.6985	14.2119	0				2006-08-29	23.1079	30.9989	18.8052	0
2006-08-30	17.621	26.4977	16.6335	0.212771				2006-08-30	22.6895	28.0474	14.7513	0				2006-08-30	20.4214	29.2813	17.9532	0
2006-08-31	21.0457	26.4018	16.5969	0				2006-08-31	23.3762	29.3199	18.4266	0				2006-08-31	22.1559	28.0456	16.3364	0
2006-09-01	11.8247	23.6992	17.3149	0.0281226				2006-09-01	21.4608	30.3567	19.3714	0.0294553				2006-09-01	21.9916	28.0274	17.0916	0
2006-09-02	18.9539	24.5382	17.229	0.080775				2006-09-02	19.1013	30.4896	19.9156	0.472575				2006-09-02	21.7033	29.3733	16.3322	0.0951482
2006-09-03	19.9672	26.2006	17.6634	0				2006-09-03	14.5231	26.6527	17.2307	10.2166				2006-09-03	20.9321	29.6433	15.796	0.909153
2006-09-04	17.9532	26.2957	17.6535	0				2006-09-04	7.26213	17.2839	9.93436	2.34805				2006-09-04	19.3658	26.9167	17.4966	2.00352
2006-09-05	14.3214	27.2541	17.9219	1.14188				2006-09-05	22.8856	21.246	11.5217	0				2006-09-05	14.2084	26.239	16.8163	1.16859
2006-09-06	3.32115	17.6345	13.6875	10.4249				2006-09-06	20.4381	26.6065	14.6381	0				2006-09-06	15.9629	24.6875	16.4326	11.0887
2006-09-07	19.6047	19.0139	9.99316	0.0778657				2006-09-07	17.2173	29.5376	16.4894	0.422415				2006-09-07	16.2897	24.7692	11.5782	1.01653
2006-09-08	19.9242	22.1617	10.7708	0				2006-09-08	20.0747	24.2721	11.979	0				2006-09-08	22.191	26.1461	12.1599	0
2006-09-09	19.9133	26.6491	12.8178	0.171237				2006-09-09	19.8814	21.2902	12.1411	0				2006-09-09	21.1095	24.7375	14.744	0.469463
2006-09-10	17.6683	23.5671	12.5389	0.161199				2006-09-10	16.8677	24.1897	14.7818	0				2006-09-10	12.2436	23.045	14.5856	0.922925
2006-09-11	20.2322	24.109	12.9193	0.235701				2006-09-11	14.0324	23.7432	12.8711	0.312051				2006-09-11	9.23689	18.0899	12.58	1.17077
2006-09-12	16.5785	28.659	16.1351	3.08657				2006-09-12	19.4684	18.1575	10.5725	0				2006-09-12	11.8511	14.8736	9.81848	1.85311
2006-09-13	18.1667	29.4237	14.8015	0.108828				2006-09-13	18.8938	18.6563	9.06574	0				2006-09-13	13.0757	18.4396	7.7601	0.14432
2006-09-14	7.46613	15.6392	10.7221	0.879701				2006-09-14	18.8298	21.1096	11.533	0.264777				2006-09-14	20.362	20.5125	11.2403	0.0386108
2006-09-15	21.0545	20.8733	10.6934	0				2006-09-15	15.2791	23.2591	12.6609	0.0194128				2006-09-15	19.5409	24.2926	7.23306	0.051539
2006-09-16	11.6426	18.5417	11.983	0.0729267				2006-09-16	19.1778	24.0897	13.6501	0.0792355				2006-09-16	19.7748	22.2803	10.3996	0
2006-09-17	14.1543	18.5726	10.3798	0.264353				2006-09-17	19.597	23.8946	11.2139	0				2006-09-17	20.6512	23.7469	10.6282	0
2006-09-18	10.6776	17.8087	10.1522	0.184463				2006-09-18	20.0262	25.4164	13.8162	0				2006-09-18	20.666	24.1522	11.0362	0
2006-09-19	20.0218	23.9927	11.6603	0				2006-09-19	11.1548	24.8608	14.2028	0				2006-09-19	19.5926	24.3729	12.4548	0
2006-09-20	19.4957	24.8862	11.9651	0				2006-09-20	19.0631	29.5714	14.1417	0				2006-09-20	12.6309	19.5792	9.92252	2.30679
2006-09-21	20.1032	25.5046	14.1058	0				2006-09-21	17.9957	27.2931	13.7329	0.046892				2006-09-21	11.842	20.1001	11.1204	0.340074
2006-09-22	19.3093	26.8588	13.9255	0				2006-09-22	13.9685	25.3546	13.4241	0				2006-09-22	16.4042	23.9641	11.3448	0.0584197
2006-09-23	18.0506	26.9166	13.7375	0				2006-09-23	6.53092	19.0003	9.83908	0.112296				2006-09-23	19.2722	26.6895	13.3985	0.0852774
2006-09-24	10.8065	22.2302	12.9698	0.167684				2006-09-24	8.85798	19.7463	10.1621	0.0840746				2006-09-24	9.80564	22.3272	12.6168	0.0950338
2006-09-25	10.9657	22.0439	13.4077	0.256129				2006-09-25	4.81092	18.8638	10.45	4.94371				2006-09-25	5.48847	17.2979	10.1015	10.7024
2006-09-26	8.17341	19.0944	14.868	0.556194				2006-09-26	3.23712	14.5969	8.61179	8.31249				2006-09-26	6.00932	18.0529	9.81528	0
2006-09-27	7.19869	19.6273	14.277	4.70605				2006-09-27	4.95547	13.2766	5.2222	2.79342				2006-09-27	6.50415	17.0235	10.0506	0.490729
2006-09-28	2.05626	17.487	13.4132	5.32644				2006-09-28	8.46824	14.9838	5.54767	0.742646				2006-09-28	4.65807	14.514	7.22687	0.296572
2006-09-29	4.91973	12.6493	6.79044	2.9241				2006-09-29	13.8915	18.6397	8.92795	1.25329				2006-09-29	7.23229	14.9258	6.52829	0.825479
2006-09-30	6.73677	13.9736	6.45432	0.514371				2006-09-30	7.67106	12.8899	5.87747	1.99547				2006-09-30	7.99158	17.4107	6.5506	0.135793
2006-10-01	12.7895	14.9726	5.92996	0.0624182				2006-10-01	9.0867	14.0012	3.65686	0				2006-10-01	10.4417	18.756	8.73941	0.274964
2006-10-02	18.1743	15.8888	5.15518	0				2006-10-02	17.4361	19.2585	7.08432	0				2006-10-02	8.28712	21.1583	10.8169	0.252617
2006-10-03	19.0737	21.8586	4.95355	0				2006-10-03	11.7689	18.3463	7.42181	2.5936				2006-10-03	14.4057	20.4355	9.35202	0.0167584
2006-10-04	18.6492	22.8849	6.37692	0				2006-10-04	11.4618	17.1836	5.8013	0.0871145				2006-10-04	8.57723	13.9791	5.42953	0.304281
2006-10-05	16.0844	23.7056	8.88672	0				2006-10-05	17.9431	16.8387	2.88498	0				2006-10-05	9.47829	15.9965	5.63721	0.22467
2006-10-06	15.2364	23.8343	10.8869	0				2006-10-06	17.5276	21.6447	6.7468	0				2006-10-06	17.0467	20.3694	7.80933	0
2006-10-07	15.744	24.1618	9.92545	0.0776007				2006-10-07	16.46	20.8102	5.29205	0				2006-10-07	15.8755	21.4254	9.28073	0.0538416
2006-10-08	16.083	16.3385	4.47128	0				2006-10-08	16.0465	23.4109	9.62866	0				2006-10-08	8.79405	20.7524	10.3221	0.148729
2006-10-09	16.4959	15.8837	3.67603	0				2006-10-09	12.1096	20.269	9.16077	0.558443				2006-10-09	11.6974	23.9446	13.0441	0.862029
2006-10-10	15.4067	17.0414	5.35602	0				2006-10-10	14.3787	17.5293	7.35263	0				2006-10-10	2.94299	21.045	12.3169	0.785287
2006-10-11	17.1451	20.202	5.51694	0				2006-10-11	15.2761	22.3763	7.73022	0				2006-10-11	10.6055	25.6877	13.2406	0.462957
2006-10-12	15.7674	21.8657	8.65143	0				2006-10-12	13.8953	18.0839	7.46622	0				2006-10-12	5.11135	10.3541	6.36752	3.0392
2006-10-13	13.8192	20.6422	8.09753	0				2006-10-13	14.3762	19.7291	6.56586	0				2006-10-13	6.79137	6.80023	0.269196	0.679021
2006-10-14	15.6826	21.9799	8.24823	0				2006-10-14	15.1854	20.1238	4.03153	0				2006-10-14	7.63283	7.37329	-3.76398	0.305977
2006-10-15	8.22427	16.3891	7.90857	0.325214				2006-10-15	14.6554	18.3586	5.53662	0				2006-10-15	4.72591	6.72598	-2.33859	0.357858
2006-10-16	12.3112	16.1991	4.9935	0				2006-10-16	15.0101	20.7505	7.7131	0				2006-10-16	10.1991	11.3197	-0.200623	0.0711904
2006-10-17	16.0641	12.09	0.680634	0				2006-10-17	14.738	22.6817	7.86822	0				2006-10-17	14.0334	11.9302	-1.23587	0.141324
2006-10-18	16.0283	12.0839	-0.372345	0				2006-10-18	12.4097	18.5672	7.55124	0				2006-10-18	14.4	11.9577	2.07031	0
2006-10-19	14.8757	17.0553	1.59085	0				2006-10-19	13.3325	21.3647	8.19562	0.0442828				2006-10-19	14.9439	10.0583	1.25928	0.0491853
2006-10-20	14.8171	20.5987	4.80994	0.157398				2006-10-20	14.2612	22.7354	8.89246	0.0303916				2006-10-20	14.8221	13.1907	1.53033	0
2006-10-21	9.97135	13.096	5.57028	0.725956				2006-10-21	13.5452	19.2955	8.04983	0				2006-10-21	14.6255	14.9722	1.25278	0
2006-10-22	5.84213	11.8902	3.18967	0.274208				2006-10-22	8.91918	20.3156	8.31143	0.53201				2006-10-22	14.3246	14.4662	2.70874	0.145002
2006-10-23	14.3656	14.1523	1.9372	0				2006-10-23	4.85998	18.1061	7.2384	4.06169				2006-10-23	14.1827	17.6661	1.73563	0
2006-10-24	13.7024	11.0298	-0.0891113	0				2006-10-24	7.90087	7.97436	1.31519	3.63736				2006-10-24	12.5218	16.9149	4.14926	0.00822942
2006-10-25	14.2711	13.4514	-1.08292	0				2006-10-25	14.3854	8.53571	-4.71481	0				2006-10-25	9.39533	13.2766	3.57364	0
2006-10-26	13.0521	13.1947	-1.02515	0				2006-10-26	13.3843	16.3603	1.86041	0.0841833				2006-10-26	10.2375	7.65918	-3.84103	0.0318083
2006-10-27	13.9128	15.8249	-0.200958	0				2006-10-27	13.2537	3.95312	-6.18207	0.0306268				2006-10-27	14.6043	4.08722	-7.24112	0
2006-10-28	13.5773	15.9392	0.050293	0.0576313				2006-10-28	12.754	6.45892	-7.06949	0				2006-10-28	14.1553	6.91052	-5.52112	0
2006-10-29	13.1761	18.6687	3.4805	0.0340571				2006-10-29	13.2202	10.3617	-5.63379	0				2006-10-29	12.9666	11.4547	-2.02582	0
2006-10-30	5.88716	10.6764	-1.21994	0.0620382				2006-10-30	13.6103	11.9329	-2.09955	0				2006-10-30	13.6863	9.34314	-0.881805	0
2006-10-31	12.9632	9.09793	-2.02963	0				2006-10-31	8.86182	13.4389	-0.170807	0.346654				2006-10-31	13.4923	10.2697	-1.00806	0
2006-11-01	12.2132	14.8361	2.65491	0				2006-11-01	5.74988	8.27475	-3.96396	0.091875				2006-11-01	13.1436	11.6765	0.260071	0
2006-11-02	13.0545	18.5832	2.97928	0				2006-11-02	12.8396	11.5871	-2.01227	0				2006-11-02	12.8742	12.5274	-0.549866	0
2006-11-03	8.96344	11.4001	2.70038	0.164937				2006-11-03	11.866	16.6533	1.27841	0				2006-11-03	12.7765	10.8779	-2.69919	0
2006-11-04	9.6808	9.52023	-0.548615	2.38707				2006-11-04	12.4571	15.7307	0.477356	0				2006-11-04	12.5799	13.1038	-0.205627	0
2006-11-05	10.643	8.58591	-1.21475	0.0673056				2006-11-05	7.755	16.3106	2.79971	0.0742477				2006-11-05	12.2054	13.8567	1.34006	0
2006-11-06	9.07662	17.1883	4.16989	0				2006-11-06	10.0772	6.99658	-3.24658	0.0571569				2006-11-06	11.3389	13.4458	1.4158	0
2006-11-07	10.3675	12.4368	-3.80759	0.116236				2006-11-07	11.6285	5.28183	-5.06531	0				2006-11-07	11.2362	13.2515	0.500946	0
2006-11-08	5.1271	-0.864471	-5.31607	0				2006-11-08	11.735	11.1148	-1.79153	0				2006-11-08	9.39248	10.4433	-0.563995	0
2006-11-09	11.9058	2.134	-5.69678	0				2006-11-09	9.88836	7.82089	-4.72809	0				2006-11-09	12.0224	7.58814	-1.51892	0
2006-11-10	11.1757	1.96139	-3.94406	0				2006-11-10	9.5633	0.236206	-6.80545	0				2006-11-10	8.05768	6.71619	-2.41226	0.0506697
2006-11-11	9.95189	1.60498	-4.11896	0				2006-11-11	6.48135	-2.26028	-8.35336	2.51032				2006-11-11	8.42979	8.33054	-0.875519	0
2006-11-12	11.1062	3.67835	-6.94022	0				2006-11-12	11.0279	-1.84128	-10.8648	0				2006-11-12	5.43466	8.84293	-0.387909	0.0899126
2006-11-13	10.502	6.58002	-1.56506	0				2006-11-13	8.45058	1.74097	-6.80386	0				2006-11-13	7.79127	11.1394	0.487061	0
2006-11-14	9.53025	9.70676	-1.21542	0				2006-11-14	8.03001	9.42868	-6.68527	0				2006-11-14	10.6912	12.3606	1.48917	0
2006-11-15	8.17488	7.85504	-1.10052	0.223971				2006-11-15	10.4063	0.462677	-5.43747	0.0693928				2006-11-15	6.76635	12.9419	2.39731	0.0154352
2006-11-16	8.42548	7.08298	-1.65314	0				2006-11-16	9.4973	-1.70364	-10.4816	0.0496196				2006-11-16	8.60527	11.3351	-0.643982	0.0370686
2006-11-17	7.77247	5.25626	-2.56882	0				2006-11-17	10.4554	-1.14398	-10.782	0.0250325				2006-11-17	3.19585	0.688812	-8.63345	0.0525064
2006-11-18	10.9978	5.65857	-1.90512	0				2006-11-18	5.57155	0.0718079	-7.26169	0.0512458				2006-11-18	8.10088	-1.45093	-10.559	0
2006-11-19	10.6213	7.45676	-2.05402	0				2006-11-19	9.44337	9.20035	-3.68921	0				2006-11-19	10.0118	2.42944	-7.12784	0
2006-11-20	10.5505	7.27478	-2.64389	0				2006-11-20	9.27405	10.6368	-2.02939	0				2006-11-20	10.4161	4.02621	-3.80823	0
2006-11-21	10.3219	6.43765	-2.74304	0				2006-11-21	10.1097	8.60294	-0.868317	0				2006-11-21	7.73612	5.00934	-1.88876	0.010149
2006-11-22	8.88013	5.43289	-2.44028	0				2006-11-22	4.88186	8.00906	-1.634	0				2006-11-22	7.12017	7.0119	-1.64551	0
2006-11-23	7.95772	4.85886	-2.80664	0				2006-11-23	9.98613	6.88413	-2.28772	0				2006-11-23	9.79321	6.33493	-1.75848	0
2006-11-24	10.0111	5.46768	-3.28421	0				2006-11-24	8.35335	6.47644	-3.41953	0				2006-11-24	8.0609	7.39963	-1.50479	0
2006-11-25	8.26469	8.67453	-5.91812	0.103338				2006-11-25	10.0238	3.44989	-4.72693	0				2006-11-25	7.87223	3.18918	-2.64651	0
2006-11-26	10.2516	-4.237	-11.6226	0				2006-11-26	8.08807	2.67712	-6.72549	0				2006-11-26	8.20385	3.87149	-3.42319	0
2006-11-27	10.2464	-1.33041	-12.541	0				2006-11-27	9.4781	5.50723	-3.77591	0				2006-11-27	4.82348	-0.336884	-7.64835	0.0627613
2006-11-28	9.71341	4.92734	-8.72983	0				2006-11-28	9.06469	8.32165	-2.2233	0				2006-11-28	4.81411	-3.28104	-9.87485	0.048808
2006-11-29	8.74202	3.53613	-3.01681	0				2006-11-29	3.42035	5.7038	-5.47348	0.0336608				2006-11-29	9.02059	3.20108	-5.35837	0
2006-11-30	9.26748	7.96854	-4.1348	0				2006-11-30	9.67478	-0.475891	-11.2102	0				2006-11-30	9.30582	7.26636	-2.88757	0
2006-12-01	6.04702	-4.34839	-11.3218	0				2006-12-01	9.11927	-2.93164	-14.1655	0				2006-12-01	8.97264	7.41901	-3.34897	0
2006-12-02	9.81488	-0.904907	-12.0847	0				2006-12-02	7.20432	-6.12885	-16.5651	0				2006-12-02	5.81874	1.61349	-6.026	0
2006-12-03	9.30861	2.23947	-6.98923	0				2006-12-03	9.37695	-2.48712	-11.15	0				2006-12-03	9.12577	-0.094635	-7.4686	0
2006-12-04	9.00437	2.56946	-6.29398	0				2006-12-04	9.47645	-2.06229	-12.0373	0				2006-12-04	9.40386	3.45367	-5.39945	0
2006-12-05	8.87421	-0.483826	-8.82123	0				2006-12-05	7.96412	-2.72244	-13.1649	0				2006-12-05	9.06096	4.17035	-5.08066	0
2006-12-06	7.65002	-1.17578	-9.39291	0				2006-12-06	7.9944	-0.019043	-7.8461	0				2006-12-06	9.0347	5.72696	-6.5622	0
2006-12-07	8.23996	1.16324	-7.29614	0				2006-12-07	8.12466	-0.611786	-6.97214	0				2006-12-07	8.75286	2.42459	-7.92923	0
2006-12-08	8.85435	2.2399	-8.25333	0				2006-12-08	4.41489	2.00342	-7.21371	0				2006-12-08	8.51862	3.45163	-6.39175	0
2006-12-09	8.85843	6.50845	-4.55814	0				2006-12-09	6.2652	2.85919	-8.87479	0.0511281				2006-12-09	6.08807	1.80856	-8.69882	0
2006-12-10	5.83148	-1.49612	-11.6557	0.0362507				2006-12-10	8.12963	-5.99503	-13.3994	0.0288223				2006-12-10	9.04386	-0.886231	-9.48373	0
2006-12-11	8.77991	-5.30469	-12.9566	0.0367544				2006-12-11	8.82163	-6.95145	-15.6647	0				2006-12-11	8.99944	3.20825	-8.71207	0
2006-12-12	7.06057	-5.16	-12.8455	0				2006-12-12	8.81226	-2.9805	-14.9305	0				2006-12-12	8.74151	4.30051	-9.00577	0
2006-12-13	8.30957	-2.6582	-12.8325	0				2006-12-13	7.34286	-0.693634	-9.47702	0				2006-12-13	5.46029	-4.06381	-11.5358	0
2006-12-14	8.58092	0.786987	-9.53232	0				2006-12-14	8.29072	1.42264	-9.52213	0				2006-12-14	8.71963	-2.69251	-12.3778	0
2006-12-15	8.46829	2.84647	-7.98715	0				2006-12-15	6.50696	-0.109589	-8.36923	0				2006-12-15	6.31594	-0.493652	-8.70819	0
2006-12-16	7.16855	1.31186	-9.47452	0				2006-12-16	8.28379	-0.609436	-10.2257	0				2006-12-16	8.31919	0.205841	-9.43082	0
2006-12-17	8.23498	0.353973	-11.1196	0				2006-12-17	8.81126	-0.679718	-12.1527	0				2006-12-17	8.61515	1.2128	-10.2535	0
2006-12-18	6.60678	-0.983093	-10.4161	0				2006-12-18	8.33211	1.52771	-9.10287	0				2006-12-18	8.71272	3.44144	-8.19321	0
2006-12-19	8.67975	-2.15088	-11.8865	0				2006-12-19	6.64051	-1.61313	-10.2621	0.0174659				2006-12-19	7.93176	3.31937	-7.40756	0.0418114
2006-12-20	8.97175	-1.93204	-12.9585	0				2006-12-20	8.16002	-0.115906	-10.209	0				2006-12-20	5.06412	0.670349	-6.37387	0.150007
2006-12-21	8.63459	-0.966278	-13.0676	0				2006-12-21	8.40781	0.69809	-7.45489	0				2006-12-21	2.19648	-8.16727	-16.2979	0.786377
2006-12-22	8.70047	-0.261719	-12.4657	0				2006-12-22	8.29486	1.0618	-8.39197	0				2006-12-22	8.34494	-10.1844	-17.7856	0
2006-12-23	8.63385	-1.25385	-11.203	0				2006-12-23	7.89999	2.0907	-9.96622	0				2006-12-23	9.0416	-8.8558	-18.5181	0
2006-12-24	7.38293	1.8717	-8.6702	0				2006-12-24	8.21647	2.34601	-8.26843	0				2006-12-24	8.67045	-6.72742	-15.587	0
2006-12-25	8.48841	1.75122	-9.7175	0				2006-12-25	8.37242	3.45352	-8.06662	0				2006-12-25	9.39583	-4.82028	-14.6917	0
2006-12-26	8.14764	-1.31836	-10.8712	0				2006-12-26	8.75026	-0.596283	-10.2865	0				2006-12-26	8.68858	0.202789	-12.4663	0
2006-12-27	8.7533	1.21664	-11.8447	0				2006-12-27	8.98391	3.4072	-10.7198	0				2006-12-27	9.07469	-0.00131226	-12.225	0
2006-12-28	5.2614	1.80237	-9.7074	0				2006-12-28	8.56601	4.39728	-7.77115	0				2006-12-28	8.9159	5.56747	-7.24185	0
2006-12-29	8.82114	2.50015	-9.42133	0				2006-12-29	8.77046	3.37109	-8.01889	0				2006-12-29	1.77648	-2.74512	-14.5248	0.0176466
2006-12-30	8.82661	1.64221	-9.29886	0				2006-12-30	9.07252	4.56515	-8.53445	0				2006-12-30	6.90364	-3.65686	-14.1449	0
2006-12-31	8.7417	-1.02432	-10.5658	0				2006-12-31	8.28379	3.81406	-5.84244	0				2006-12-31	6.48003	-4.5155	-14.8607	0
2007-01-01	5.59482	0.035614	-10.2156	0				2007-01-01	6.43001	3.98868	-6.43433	0				2007-01-01	2.24102	-3.60202	-12.5046	0
2007-01-02	8.31096	0.726654	-9.87701	0				2007-01-02	8.242	4.07584	-6.64816	0				2007-01-02	5.83775	-3.46274	-12.858	0
2007-01-03	7.86794	3.77389	-10.3673	0				2007-01-03	7.53477	5.07803	-8.17841	0				2007-01-03	5.88269	-3.06815	-11.8207	0
2007-01-04	9.17106	-7.92941	-13.6758	0				2007-01-04	5.40618	1.36069	-8.18655	0.0191176				2007-01-04	9.19338	-1.11057	-10.9014	0
2007-01-05	8.59651	-5.49674	-14.8152	0				2007-01-05	3.36691	0.647217	-8.46619	0.231124				2007-01-05	8.78637	-0.409943	-10.7871	0
2007-01-06	8.17656	-2.37289	-15.4128	0				2007-01-06	1.32765	3.49069	-4.02383	0.0101695				2007-01-06	7.7602	-0.556549	-10.3901	0
2007-01-07	7.60798	-3.44818	-9.94778	0				2007-01-07	6.39044	7.54794	-3.51804	0				2007-01-07	9.12083	2.45517	-8.58878	0
2007-01-08	8.17266	-4.12302	-12.9309	0				2007-01-08	7.30186	8.09726	-3.78265	0				2007-01-08	8.66042	0.316315	-9.75558	0
2007-01-09	9.76595	-2.92981	-13.7017	0				2007-01-09	6.91162	6.74728	-4.64487	0				2007-01-09	7.71589	-0.47876	-10.9203	0
2007-01-10	6.96487	-3.05936	-11.5249	0				2007-01-10	6.97102	4.35727	-5.759	0				2007-01-10	9.12484	0.99704	-10.3066	0
2007-01-11	8.80632	-1.15772	-11.8489	0				2007-01-11	3.83662	3.75113	-7.06107	0.0110911				2007-01-11	9.62941	1.26697	-9.87332	0
2007-01-12	9.19485	1.21567	-12.7232	0				2007-01-12	8.03924	-0.463654	-9.33887	0				2007-01-12	9.69388	-0.019104	-11.1556	0
2007-01-13	6.95812	-0.348328	-11.54	0				2007-01-13	8.27777	4.78702	-8.14798	0				2007-01-13	9.73973	0.70404	-11.9716	0
2007-01-14	8.62362	-6.33414	-16.7157	0				2007-01-14	6.7578	-0.0245666	-10.3169	0				2007-01-14	8.83905	-2.32407	-12.1437	0
2007-01-15	9.91932	-8.16305	-18.3013	0				2007-01-15	7.66163	-0.690765	-10.7965	0				2007-01-15	10.3714	-1.28461	-13.0757	0
2007-01-16	9.36419	-9.74777	-18.6141	0				2007-01-16	9.59965	-2.37503	-12.6635	0				2007-01-16	9.92626	0.155029	-11.9506	0
2007-01-17	10.6243	-9.95029	-20.1503	0				2007-01-17	9.75614	-0.577301	-13.01	0				2007-01-17	10.4313	0.191193	-11.9306	0
2007-01-18	10.5471	-8.22199	-21.896	0				2007-01-18	8.13425	1.78302	-9.26538	0				2007-01-18	10.1214	3.48178	-9.38461	0
2007-01-19	10.9272	-3.03091	-18.8436	0				2007-01-19	10.2464	3.83124	-7.44074	0				2007-01-19	9.75054	1.94876	-17.4381	0.64595
2007-01-20	7.29797	-2.00244	-15.9356	0				2007-01-20	10.1322	6.7991	-3.02362	0				2007-01-20	6.57313	-12.8426	-23.9411	0
2007-01-21	8.41559	-2.77567	-15.8292	0				2007-01-21	7.2413	1.59018	-9.86066	0				2007-01-21	10.7824	-6.28903	-20.4248	0
2007-01-22	10.2664	-5.72656	-17.812	0				2007-01-22	6.4736	0.717804	-10.4819	0				2007-01-22	10.6277	0.616211	-13.6273	0
2007-01-23	10.2859	-3.13977	-17.0045	0				2007-01-23	9.24429	-3.90183	-12.4271	0				2007-01-23	9.62211	-0.355804	-11.6595	0
2007-01-24	8.00792	1.38223	-13.7557	0				2007-01-24	6.61115	-3.38757	-15.5639	0				2007-01-24	7.8067	-0.680573	-13.2118	0
2007-01-25	10.5538	3.90366	-10.3671	0				2007-01-25	3.76637	-3.37186	-14.0704	0				2007-01-25	10.6588	-0.324188	-11.5931	0
2007-01-26	10.5678	6.25	-6.13849	0				2007-01-26	4.73967	-4.74383	-16.2647	0				2007-01-26	10.1104	4.66296	-10.1511	0
2007-01-27	9.21864	9.09259	-8.91052	0.0125799				2007-01-27	6.86208	-4.43045	-16.1098	0.830113				2007-01-27	9.40989	7.672	-8.53153	0
2007-01-28	5.32217	-5.80063	-14.091	0.422293				2007-01-28	6.38295	-5.64093	-17.4452	0.421551				2007-01-28	3.4853	-5.45523	-17.5076	0
2007-01-29	9.67985	-8.80218	-15.473	0				2007-01-29	11.7371	-9.35034	-17.7624	0				2007-01-29	11.8619	-11.1121	-19.6575	0
2007-01-30	8.63806	-6.8739	-16.5089	0.0370039				2007-01-30	12.1298	-6.89017	-18.5362	0				2007-01-30	10.5851	-11.8027	-21.6626	0
2007-01-31	10.5488	-9.99384	-17.2015	0				2007-01-31	12.0936	-5.76898	-16.7684	0				2007-01-31	12.2422	-11.8148	-23.8484	0
2007-02-01	12.312	-7.73386	-18.8465	0				2007-02-01	11.9121	-2.11975	-16.2127	0				2007-02-01	11.5864	-6.40549	-18.5342	0.00858385
2007-02-02	12.4134	-6.51218	-20.5767	0				2007-02-02	10.2718	0.896729	-11.0089	0				2007-02-02	5.46962	-6.69409	-17.5039	0
2007-02-03	12.0593	-5.38037	-17.2677	0				2007-02-03	12.343	-2.78601	-14.1883	0				2007-02-03	11.9109	-3.90854	-15.7132	0
2007-02-04	11.0899	-7.13403	-16.8047	0				2007-02-04	11.4446	1.60681	-11.2934	0				2007-02-04	12.2114	0.981354	-12.1477	0
2007-02-05	9.67287	-2.09378	-15.2658	0				2007-02-05	12.0563	2.03244	-11.1898	0				2007-02-05	12.7157	2.56924	-11.032	0
2007-02-06	9.51192	5.11005	-11.7284	3.42004				2007-02-06	9.77092	3.36606	-9.30508	0				2007-02-06	12.0315	7.03952	-5.07104	0
2007-02-07	10.3524	-3.69891	-14.9872	0.0187739				2007-02-07	11.5771	3.19199	-7.74048	0				2007-02-07	12.125	3.83084	-6.26163	0
2007-02-08	13.2765	-5.91962	-16.1139	0				2007-02-08	11.2475	4.77759	-8.30954	0				2007-02-08	7.40425	9.13492	-7.8566	0.0213783
2007-02-09	13.3338	-4.91052	-16.548	0				2007-02-09	3.60214	3.43735	-7.21869	2.51999				2007-02-09	10.367	-1.66128	-11.2839	0
2007-02-10	12.5222	-2.57657	-15.1972	0				2007-02-10	1.31899	0.267761	-9.98025	4.19253				2007-02-10	13.3098	3.3486	-9.48959	0
2007-02-11	12.6107	2.09897	-12.4611	0				2007-02-11	9.81131	-1.16702	-11.8524	0.0223862				2007-02-11	13.0925	10.4089	-4.84512	0
2007-02-12	12.715	2.39343	-11.2828	0				2007-02-12	8.91154	-2.47855	-13.2347	0.0600371				2007-02-12	6.47921	-0.0480957	-14.2503	0.0290236
2007-02-13	13.0065	7.56918	-9.35916	0				2007-02-13	11.4191	-6.58093	-16.5684	0.00697982				2007-02-13	10.6349	-7.08456	-18.5635	0
2007-02-14	13.1122	6.23025	-6.10468	0				2007-02-14	13.9365	-4.43686	-18.6105	0.00631925				2007-02-14	11.5129	-1.34811	-14.7441	0.00887064
2007-02-15	10.4808	8.25763	-4.96909	0.0695552				2007-02-15	13.4184	-0.18869	-12.5024	0.017592				2007-02-15	13.3741	5.61679	-7.00504	0
2007-02-16	11.953	5.06802	-4.66836	0				2007-02-16	12.2877	-1.24887	-10.166	0.0712041				2007-02-16	12.7178	7.21213	-2.93506	0
2007-02-17	13.2724	4.64798	-6.58295	0				2007-02-17	7.44564	-4.94687	-16.1801	0.274671				2007-02-17	12.3418	6.22177	-2.71756	0
2007-02-18	12.3115	5.37939	-6.21524	0.0141538				2007-02-18	12.955	-6.9744	-17.7135	0				2007-02-18	13.6187	10.0405	-1.34912	0
2007-02-19	12.2883	0.678375	-11.2046	0				2007-02-19	13.6894	-4.14145	-15.8359	0.0338356				2007-02-19	9.66356	3.58914	-5.78357	0.0507377
2007-02-20	14.4725	2.16501	-12.4256	0				2007-02-20	15.0048	0.670013	-13.2724	0				2007-02-20	15.0238	3.78854	-8.48129	0
2007-02-21	11.9056	5.76602	-7.37149	0				2007-02-21	13.1567	0.563141	-9.36411	0.0153028				2007-02-21	14.3378	8.12228	-3.46268	0
2007-02-22	14.7323	-1.42532	-10.4331	0				2007-02-22	14.2807	1.27359	-8.56644	0				2007-02-22	15.4615	4.37393	-4.85922	0
2007-02-23	12.6779	2.14664	-11.4758	0				2007-02-23	13.4915	-0.743439	-9.25394	0				2007-02-23	14.7247	4.68298	-6.15671	0
2007-02-24	7.55668	0.912933	-6.65097	0.0144701				2007-02-24	15.7829	0.420471	-9.74234	0				2007-02-24	15.7292	7.34854	-3.51917	0
2007-02-25	14.2979	4.62311	-9.42261	0				2007-02-25	14.8079	1.54141	-9.32327	0				2007-02-25	15.2754	11.2745	-1.49051	0
2007-02-26	14.5121	7.10605	-5.27127	0				2007-02-26	14.5513	3.77445	-7.90353	0.0236621				2007-02-26	15.2659	12.7306	-0.9776	0
2007-02-27	14.2638	8.89481	-5.09811	0				2007-02-27	15.6825	2.23593	-7.92621	0.00393289				2007-02-27	14.3135	13.3195	-0.752472	0
2007-02-28	15.1027	10.5013	-3.28296	0				2007-02-28	16.8409	3.9567	-7.85938	0				2007-02-28	13.6834	11.9207	-1.52826	0.0313867
2007-03-01	10.9762	7.93839	-3.45148	0.121953				2007-03-01	16.9055	9.23618	-3.07675	0				2007-03-01	10.2668	7.55164	-2.91629	0.102799
2007-03-02	17.2446	8.32938	-3.35248	0				2007-03-02	16.0324	10.2352	-1.27466	0				2007-03-02	6.99807	1.86643	-8.58627	1.72226
2007-03-03	17.4722	11.7463	-3.42197	0				2007-03-03	15.4544	13.3114	-0.0381775	0				2007-03-03	14.4221	2.55835	-10.4344	0
2007-03-04	17.6098	14.3054	-2.50501	0				2007-03-04	16.391	12.0396	-5.19778	0				2007-03-04	16.9939	9.34695	-2.77997	0.0170752
2007-03-05	17.8521	18.8867	-3.39902	0				2007-03-05	18.1423	4.70636	-7.40018	0				2007-03-05	18.203	8.71689	-4.11877	0
2007-03-06	17.3416	16.1934	-1.97855	0.00876518				2007-03-06	18.3836	8.49466	-3.60684	0				2007-03-06	18.2627	10.9532	-1.55902	0
2007-03-07	9.35837	11.6827	1.89581	0.00670148				2007-03-07	17.837	11.8869	-1.09488	0				2007-03-07	9.46681	9.13788	-1.77408	0.102097
2007-03-08	10.1454	10.0227	-2.60184	0.135549				2007-03-08	18.5667	11.3621	-0.946655	0				2007-03-08	12.2501	5.49091	-5.90951	0.0122041
2007-03-09	18.5149	8.29092	-3.4212	0				2007-03-09	19.0049	16.8469	1.72888	0				2007-03-09	19.0779	4.66904	-7.65802	0
2007-03-10	16.9691	8.68576	-3.07187	0				2007-03-10	17.9702	19.6251	6.52081	0				2007-03-10	19.8592	7.31668	-4.71256	0
2007-03-11	18.1067	11.8609	-2.07431	0				2007-03-11	5.83157	8.7775	-0.361908	0.00410225				2007-03-11	17.3578	9.57938	-0.91272	0
2007-03-12	18.0684	16.6556	-1.24591	0				2007-03-12	18.3516	9.27551	-2.50006	0				2007-03-12	14.9158	11.0716	-1.0524	0.0099168
2007-03-13	17.5869	11.3087	-1.07132	0				2007-03-13	18.3942	12.4134	0.984772	0				2007-03-13	18.9646	7.16092	-3.29834	0
2007-03-14	19.0448	12.6574	-1.42798	0.0100625				2007-03-14	18.9427	13.1428	2.51074	0				2007-03-14	18.9873	8.11136	-3.1965	0.0261017
2007-03-15	19.1158	14.0894	2.33905	0.0264842				2007-03-15	18.016	15.7001	3.04791	0.0206505				2007-03-15	19.6186	16.286	1.2142	0
2007-03-16	16.132	10.0521	-1.12088	0.104574				2007-03-16	16.6668	12.9031	2.86426	0				2007-03-16	20.417	19.4876	5.51434	0
2007-03-17	20.3702	9.29453	-0.628876	0				2007-03-17	12.1541	12.1272	0.0522156	0.105463				2007-03-17	10.304	11.5672	-3.37826	0.108195
2007-03-18	20.0777	14.6222	-2.00055	0				2007-03-18	19.4195	16.3712	4.10901	0				2007-03-18	11.6641	4.23447	-6.52411	0.0356786
2007-03-19	18.5856	7.83188	-3.34106	0				2007-03-19	18.096	13.3496	3.87344	0.0512916				2007-03-19	16.7376	11.2695	0.198151	0.0368896
2007-03-20	17.2558	15.9335	-0.469055	0				2007-03-20	14.7064	15.8828	3.15598	0				2007-03-20	17.7521	10.9096	0.80011	0.0256682
2007-03-21	14.2631	15.8092	2.40692	0.262706				2007-03-21	19.1327	18.145	5.9733	0				2007-03-21	13.044	6.5708	-1.98477	0
2007-03-22	17.1689	9.50571	-1.15125	0.0324119				2007-03-22	19.6404	17.5016	5.78363	0.210984				2007-03-22	20.0774	8.2128	-2.73001	0
2007-03-23	20.6529	10.6818	-2.12204	0				2007-03-23	11.5881	8.59811	-0.55307	0.134028				2007-03-23	18.6809	10.1126	2.41974	0.0215726
2007-03-24	19.7263	13.3812	-1.46018	0				2007-03-24	14.3704	6.31036	-3.2341	0				2007-03-24	22.4429	19.8775	4.28049	0
2007-03-25	20.3374	14.1732	0.244507	0				2007-03-25	20.5373	14.2994	-0.991425	0				2007-03-25	16.799	17.5206	4.42014	0
2007-03-26	16.3213	16.8101	2.68597	0.559347				2007-03-26	21.8353	13.235	1.50674	0				2007-03-26	20.267	18.2388	4.91928	0
2007-03-27	14.4559	15.8114	4.43341	0.564025				2007-03-27	21.0463	15.9894	3.13278	0				2007-03-27	20.4447	22.2171	7.85101	0
2007-03-28	20.9484	19.6913	3.34375	0				2007-03-28	20.7477	19.5014	5.46884	0.0382309				2007-03-28	21.4229	24.6979	8.66986	0
2007-03-29	17.9015	20.8393	7.51837	0.0504083				2007-03-29	13.0646	17.1777	4.70291	0.109076				2007-03-29	21.5525	26.7876	11.7285	0.0382823
2007-03-30	12.345	18.0227	7.64511	0.227608				2007-03-30	18.2116	21.8313	6.24442	0				2007-03-30	15.2899	23.9154	11.9326	0.284332
2007-03-31	0.994087	8.69037	1.76178	0.341552				2007-03-31	19.492	19.5179	8.5379	0				2007-03-31	12.2688	17.4899	7.20865	0.0246978
2007-04-01	21.1651	10.6653	0.403809	0				2007-04-01	19.5474	18.317	6.46286	0				2007-04-01	20.2115	22.3172	7.03275	0
2007-04-02	21.9628	12.36	0.469238	0				2007-04-02	21.3461	20.2431	6.10861	0.00750038				2007-04-02	15.1814	24.9947	8.62433	7.40252
2007-04-03	21.8414	18.7145	0.443848	0				2007-04-03	23.794	16.5565	4.57431	0				2007-04-03	23.1497	16.8149	4.12021	0
2007-04-04	18.5202	17.8003	6.93661	0				2007-04-04	22.8461	14.1439	3.25263	0				2007-04-04	16.9564	15.5302	5.05814	3.62647
2007-04-05	15.9327	16.3489	6.66461	0				2007-04-05	23.0049	19.4015	6.43189	0				2007-04-05	15.764	15.1639	4.84988	0.0990203
2007-04-06	18.804	18.3619	7.92718	0				2007-04-06	20.5033	21.2448	5.77054	0.0190947				2007-04-06	22.7469	16.6625	5.61414	0.0322753
2007-04-07	19.0117	20.1062	8.54895	0.0544517				2007-04-07	22.8768	11.6249	2.23547	0.0219296				2007-04-07	24.0226	24.7047	9.29187	0
2007-04-08	5.96306	13.1267	11.2835	0.284816				2007-04-08	24.7815	6.16611	-2.0397	0				2007-04-08	19.7415	24.6591	5.33075	0.784541
2007-04-09	3.64002	11.8414	9.43839	2.35211				2007-04-09	23.9841	5.43149	-2.62216	0.0242604				2007-04-09	13.345	8.54404	-0.533722	0.26485
2007-04-10	16.8498	16.2645	8.61917	0.0291841				2007-04-10	24.3245	11.4659	-0.613739	0				2007-04-10	22.5407	11.2275	-0.520233	0.0303488
2007-04-11	22.3368	21.6213	8.97037	0				2007-04-11	22.4937	13.2093	3.67416	0.0833516				2007-04-11	18.438	15.7918	6.13556	0.0455567
2007-04-12	17.2296	19.4383	9.09561	3.95074				2007-04-12	19.9738	12.1366	2.29535	0.0254068				2007-04-12	17.4206	18.2082	4.72104	0.0232617
2007-04-13	12.0832	12.6691	8.49539	0.664898				2007-04-13	23.6417	14.3389	2.87167	0.00363287				2007-04-13	22.1113	15.8254	5.5275	0
2007-04-14	18.288	16.0891	7.86554	0				2007-04-14	24.5824	21.8925	6.87122	0				2007-04-14	18.5375	17.2784	7.56863	0.128762
2007-04-15	23.0525	18.1779	8.05341	0				2007-04-15	25.9499	23.6034	12.0027	0				2007-04-15	23.8843	18.3085	7.66589	0.0650546
2007-04-16	17.2047	18.8625	9.59561	0.0207737				2007-04-16	20.6162	23.4966	10.6696	0				2007-04-16	22.5957	20.914	6.08008	0.266535
2007-04-17	16.6331	19.5252	10.2407	0.224063				2007-04-17	16.5383	15.203	2.62174	0.0895508				2007-04-17	22.3189	16.4343	5.12558	0
2007-04-18	22.7136	21.3397	10.6077	0				2007-04-18	25.5423	14.7734	2.43784	0				2007-04-18	23.8737	19.9344	8.88718	0
2007-04-19	23.294	22.2672	11.1983	0.0372444				2007-04-19	23.5579	21.1655	7.71258	0				2007-04-19	23.3292	22.4642	8.91843	0
2007-04-20	18.8433	19.4527	10.7265	0.121765				2007-04-20	22.0153	28.8552	13.9452	0				2007-04-20	24.6531	18.9078	8.81226	0
2007-04-21	12.8963	11.3953	4.73965	17.0325				2007-04-21	18.9726	26.7829	14.62	0.233643				2007-04-21	16.3776	15.0837	6.93424	0.0206903
2007-04-22	22.5379	16.3803	5.36203	0				2007-04-22	20.7002	25.9694	12.0593	6.09216				2007-04-22	24.3196	13.8912	2.2269	0.068603
2007-04-23	23.3636	19.0287	7.09647	0				2007-04-23	19.5026	14.0468	5.81509	0.0365636				2007-04-23	25.1274	13.2189	2.71515	0
2007-04-24	24.7848	20.4366	5.51764	0				2007-04-24	26.0195	15.8217	5.92758	0.0336393				2007-04-24	23.2869	22.786	10.7447	0.0145395
2007-04-25	25.6716	19.976	5.55438	0				2007-04-25	23.3059	13.6173	5.79346	0.0685182				2007-04-25	22.335	23.0279	8.89477	0.0100151
2007-04-26	23.9532	28.2464	11.5331	0				2007-04-26	25.2896	18.4022	7.24246	0				2007-04-26	14.9294	14.2498	5.27722	0
2007-04-27	17.0756	21.1281	8.82114	0.321748				2007-04-27	24.9202	14.4675	3.96265	0				2007-04-27	26.643	17.6584	6.71573	0
2007-04-28	25.9919	18.8387	8.06671	0				2007-04-28	26.4773	8.8244	3.1517	0				2007-04-28	17.6117	15.3889	7.68689	0.0128044
2007-04-29	24.6801	27.9756	11.5214	0.0238291				2007-04-29	26.6532	15.132	5.15701	0				2007-04-29	24.1805	22.0584	9.96582	0.124247
2007-04-30	25.9078	23.894	12.6021	0				2007-04-30	26.9592	17.4547	8.62009	0				2007-04-30	24.8185	23.4731	11.312	0
2007-05-01	27.6145	30.1757	14.0253	0				2007-05-01	26.8239	18.678	9.41126	0.041225				2007-05-01	27.2284	25.0947	8.93256	0
2007-05-02	26.1032	27.1547	14.8897	0				2007-05-02	11.6292	15.8083	8.53168	1.5036				2007-05-02	26.8743	22.7926	10.923	0
2007-05-03	23.0973	24.9726	15.2413	0.102358				2007-05-03	27.06	19.1443	8.0058	0.0255539				2007-05-03	25.5086	24.2335	12.8598	0.212119
2007-05-04	23.9227	28.0005	17.3613	0.108144				2007-05-04	27.3578	26.3754	14.6592	0				2007-05-04	14.8315	20.4187	10.5865	0
2007-05-05	8.93229	20.3805	9.45493	11.0192				2007-05-05	23.4035	26.2164	6.03821	0				2007-05-05	14.7204	17.359	9.80405	0.239479
2007-05-06	15.0147	16.7703	9.58578	0.599045				2007-05-06	26.3467	17.3912	8.20725	0				2007-05-06	25.1042	26.6528	11.7905	0
2007-05-07	16.5485	17.1304	10.472	0				2007-05-07	27.7892	23.7682	12.8659	0				2007-05-07	26.2023	20.7831	11.3813	0
2007-05-08	25.3011	23.2061	11.6208	0				2007-05-08	26.9509	26.2618	15.6194	0				2007-05-08	21.7851	20.2128	11.4681	0
2007-05-09	21.3516	22.9225	15.1661	1.49107				2007-05-09	27.4678	21.5554	15.1176	0				2007-05-09	25.4255	24.1418	12.0786	0
2007-05-10	16.7431	23.9345	14.9689	0.731218				2007-05-10	26.3745	26.9475	16.2905	0				2007-05-10	27.1665	22.4671	11.6083	0
2007-05-11	20.9106	22.2103	13.094	0.716806				2007-05-11	11.4949	28.0649	14.6839	2.78042				2007-05-11	27.3629	23.0291	11.6386	0
2007-05-12	3.98257	11.2241	6.49667	1.80211				2007-05-12	10.853	15.2028	7.89453	0.756631				2007-05-12	24.1155	23.4757	14.7814	0.049182
2007-05-13	19.6438	14.3103	8.11185	0.39458				2007-05-13	15.8973	17.1478	9.62643	0.903927				2007-05-13	26.3442	26.1808	14.3537	0
2007-05-14	26.4847	18.1384	8.83914	0				2007-05-14	27.3128	22.7675	11.3677	0				2007-05-14	27.8794	26.2048	15.9911	0
2007-05-15	11.4983	14.4124	10.1772	1.2431				2007-05-15	26.957	28.8717	15.4535	0				2007-05-15	25.9409	27.1672	15.08	0
2007-05-16	16.1034	14.8756	10.9829	8.10413				2007-05-16	24.0292	27.3297	15.7324	0.345604				2007-05-16	20.9431	23.1396	14.1421	0
2007-05-17	15.9678	17.1756	8.79721	17.3926				2007-05-17	18.5812	26.5958	14.6389	5.79747				2007-05-17	25.2683	25.0421	15.0962	0.12451
2007-05-18	28.6272	23.1799	11.3352	0.108623				2007-05-18	21.1158	23.0846	12.8064	2.81434				2007-05-18	13.6926	23.5756	14.406	0
2007-05-19	25.3553	24.3307	13.3046	2.22691				2007-05-19	27.3539	22.805	9.28449	0				2007-05-19	27.7571	30.1905	16.7597	0
2007-05-20	15.1499	16.638	11.7658	1.33571				2007-05-20	25.576	23.8015	11.164	0				2007-05-20	11.6725	22.4202	13.7396	5.58064
2007-05-21	26.607	21.7732	5.29636	0.0385568				2007-05-21	17.9141	18.0576	10.6263	0				2007-05-21	17.2044	20.5938	13.0391	0.15935
2007-05-22	27.4587	19.4107	6.99191	0				2007-05-22	26.4809	25.1746	12.894	0.0440121				2007-05-22	27.5733	24.1867	14.9159	0
2007-05-23	29.0829	21.6036	11.3426	0				2007-05-23	22.0117	25.9202	13.9721	0				2007-05-23	25.9311	25.1002	14.5312	0.0457814
2007-05-24	30.8636	23.741	13.4298	0				2007-05-24	20.5969	22.7435	11.3101	0.123969				2007-05-24	23.4441	21.3693	12.7998	0
2007-05-25	24.9879	24.284	14.0975	0				2007-05-25	13.6944	18.0445	10.5093	0				2007-05-25	17.1245	19.3373	11.7943	0.191302
2007-05-26	25.4652	23.8685	15.4582	0				2007-05-26	24.7027	22.9669	13.1367	0				2007-05-26	18.8671	21.6967	12.1045	0.0433302
2007-05-27	29.3975	26.4778	15.2767	0				2007-05-27	19.4781	23.4249	12.8485	0.465475				2007-05-27	28.0284	25.3808	13.6183	0
2007-05-28	30.2599	29.0873	17.0578	0				2007-05-28	29.4384	24.2079	12.0008	0				2007-05-28	29.0049	28.2539	16.3783	0
2007-05-29	26.8436	26.0175	16.4506	0.60287				2007-05-29	29.1694	21.0103	9.97876	0				2007-05-29	28.0791	28.3494	17.0546	0
2007-05-30	25.5595	25.489	16.2663	0.301036				2007-05-30	24.7398	21.6718	12.8437	0				2007-05-30	27.9472	30.015	18.5771	0
2007-05-31	20.2831	21.6515	10.842	0.0612867				2007-05-31	28.4923	25.242	13.4582	0				2007-05-31	29.306	33.2443	21.2564	0
2007-06-01	29.5278	24.7199	13.469	0				2007-06-01	27.3961	28.501	16.2435	0.100546				2007-06-01	23.5645	32.1865	19.9831	0
2007-06-02	28.7572	29.1933	15.1167	0				2007-06-02	22.486	25.8982	15.8918	0.169984				2007-06-02	24.1749	28.6266	18.5091	0.54446
2007-06-03	24.1713	27.3231	15.1142	0				2007-06-03	28.0108	26.4571	16.8104	0.0972457				2007-06-03	21.1785	29.0133	18.6096	0
2007-06-04	27.3223	30.3255	17.5689	0.128651				2007-06-04	14.8397	25.8811	16.8165	0				2007-06-04	23.484	30.3822	21.0506	0.37748
2007-06-05	11.9294	23.9807	15.366	0.974187				2007-06-05	4.97566	24.6519	14.7667	1.03221				2007-06-05	24.0858	32.7728	21.0471	1.14206
2007-06-06	26.8536	26.1349	15.888	0.048822				2007-06-06	15.9318	23.2309	14.4293	0.696271				2007-06-06	26.7759	30.8769	20.5249	0.112566
2007-06-07	24.7844	28.268	17.4364	0				2007-06-07	21.2243	24.5365	16.576	0.484707				2007-06-07	27.9289	29.1736	20.0304	0
2007-06-08	27.0663	27.5396	15.9532	0				2007-06-08	26.4522	25.6	16.5927	1.1021				2007-06-08	19.6115	28.5503	17.5468	0
2007-06-09	29.5999	30.7168	18.0464	0				2007-06-09	22.4279	25.0235	16.1976	0.860924				2007-06-09	28.5303	25.2475	12.436	0
2007-06-10	23.4273	26.5121	15.8467	0.231535				2007-06-10	25.7035	27.5269	17.4119	0				2007-06-10	29.0063	23.2444	12.9556	0
2007-06-11	16.0591	17.2689	12.2546	3.14085				2007-06-11	25.433	28.2852	17.4054	0.205347				2007-06-11	28.3721	25.3678	16.251	0.0687704
2007-06-12	16.7418	23.9174	12.7237	0				2007-06-12	24.9933	28.7861	18.7793	0.276557				2007-06-12	27.9309	28.2118	18.3084	0.0292436
2007-06-13	28.9524	24.7635	15.243	0				2007-06-13	27.6516	28.5477	18.8841	1.08747				2007-06-13	28.4247	29.2845	19.3596	0
2007-06-14	26.8622	29.3245	17.2404	1.09067				2007-06-14	26.5507	30.6346	19.5724	0.0669815				2007-06-14	24.5975	27.6192	19.5778	1.09226
2007-06-15	21.6321	25.6639	16.2985	0.18975				2007-06-15	22.1902	31.2367	18.9261	0				2007-06-15	24.341	29.7637	17.9353	0.0256385
2007-06-16	27.191	23.1523	14.3764	0				2007-06-16	18.6892	27.7862	17.4758	0.59534				2007-06-16	26.4605	25.2777	17.0276	0.347944
2007-06-17	30.1761	23.7955	14.9085	0				2007-06-17	24.3835	27.0762	18.316	0.251547				2007-06-17	27.6173	24.5188	13.9943	0.0186225
2007-06-18	29.6694	21.3783	14.391	0				2007-06-18	26.4858	27.6869	18.8398	0				2007-06-18	26.4723	25.447	16.9889	0
2007-06-19	28.6368	27.3071	16.438	0				2007-06-19	28.8511	25.3599	13.8972	0.329086				2007-06-19	23.8382	24.7931	15.3212	0
2007-06-20	28.0964	32.7845	19.8594	0				2007-06-20	24.008	20.1485	15.3136	0.443231				2007-06-20	26.5466	25.5058	17.5005	0
2007-06-21	25.0928	32.395	20.5196	0				2007-06-21	27.3154	23.9082	16.7274	1.32801				2007-06-21	28.0858	30.2854	19.5989	0
2007-06-22	10.5415	24.1641	19.2041	1.20298				2007-06-22	27.5047	26.3554	17.075	0				2007-06-22	27.8609	32.1532	20.506	0
2007-06-23	13.1553	20.2011	14.2272	0.417906				2007-06-23	27.6362	26.9442	17.9363	0.0368167				2007-06-23	28.3374	29.3719	16.4442	0
2007-06-24	28.6385	27.4969	15.8915	0				2007-06-24	24.695	25.2779	17.0798	0.158551				2007-06-24	29.2836	27.2564	16.2848	0
2007-06-25	14.3953	24.4131	17.8574	0.00756168				2007-06-25	27.3782	25.9625	17.4834	0.0747239				2007-06-25	29.0677	29.2425	17.7274	0
2007-06-26	19.3287	26.2204	19.4332	0.665306				2007-06-26	26.1547	24.1443	15.8016	0.153738				2007-06-26	28.6522	31.939	20.2017	0
2007-06-27	24.6874	26.2452	19.0135	0.606339				2007-06-27	23.2992	25.0244	17.6224	0.402756				2007-06-27	20.6326	31.2992	21.6939	0
2007-06-28	28.7517	29.7343	18.6655	0.0220997				2007-06-28	27.5644	27.1578	18.9124	0.145789				2007-06-28	25.7248	32.8678	19.4321	3.10013
2007-06-29	27.9404	30.1616	17.5871	0				2007-06-29	26.3309	28.6981	19.6771	0				2007-06-29	12.031	24.2633	18.065	0.248415
2007-06-30	26.5246	29.9121	19.2116	0				2007-06-30	19.8783	29.5035	19.5696	0.08428				2007-06-30	28.3646	29.392	19.6458	0
2007-07-01	6.28851	27.2798	19.1873	0				2007-07-01	17.8853	27.7446	19.6746	0				2007-07-01	27.3303	31.467	20.6307	0.311399
2007-07-02	14.4408	31.0774	20.6317	5.40289				2007-07-02	21.9964	30.4098	20.5449	0				2007-07-02	26.5176	31.6739	22.3252	2.42923
2007-07-03	9.41955	23.1828	16.0751	3.60877				2007-07-03	27.3726	31.6953	21.1962	0				2007-07-03	23.0214	29.7448	21.1821	2.82474
2007-07-04	12.3008	25.8684	18.0291	0.104947				2007-07-04	24.0752	31.4779	22.1336	0				2007-07-04	21.9556	28.4439	20.7757	6.69878
2007-07-05	26.751	29.4669	18.4412	0				2007-07-05	24.9162	34.5182	22.568	0				2007-07-05	22.8822	30.0127	20.5084	0.784455
2007-07-06	25.6168	30.6589	19.3611	0				2007-07-06	22.499	34.8578	19.4486	1.58086				2007-07-06	27.1572	32.432	22.8019	0
2007-07-07	21.7149	30.196	19.4701	0.336901				2007-07-07	22.8675	27.5414	18.854	0.654184				2007-07-07	21.8912	30.6462	20.5844	0.142404
2007-07-08	25.8964	31.6998	20.2612	0				2007-07-08	27.4368	27.7829	18.029	0				2007-07-08	26.7677	27.0157	16.2847	0
2007-07-09	26.3844	31.4998	20.7666	0				2007-07-09	27.6393	26.0655	17.1629	0				2007-07-09	27.526	24.6605	17.2709	0
2007-07-10	22.7013	29.7248	22.1324	0.258693				2007-07-10	29.1658	26.9594	17.8911	0				2007-07-10	25.7174	27.9969	20.295	1.78794
2007-07-11	11.7125	23.32	20.2428	1.71612				2007-07-11	28.7701	28.3806	19.359	0				2007-07-11	16.7133	27.0889	19.0709	1.26636
2007-07-12	23.6134	27.6948	20.6863	1.01133				2007-07-12	26.4846	28.8026	19.7452	0				2007-07-12	25.0494	28.4921	18.5764	0
2007-07-13	28.0419	31.7734	19.8698	0				2007-07-13	23.7078	28.4984	19.4006	0.223818				2007-07-13	28.155	28.4643	18.4856	0
2007-07-14	25.8519	33.4504	20.083	0				2007-07-14	23.8907	27.0959	18.1929	0.122442				2007-07-14	26.8072	28.5518	19.1126	0
2007-07-15	26.9226	32.2567	21.2181	0				2007-07-15	26.9439	27.7665	18.2715	0.0587736				2007-07-15	27.9803	29.6834	20.4193	0
2007-07-16	27.3614	32.5693	21.8361	0				2007-07-16	17.2594	25.9563	18.2552	0.94467				2007-07-16	27.1392	30.4649	20.9295	0
2007-07-17	28.0868	33.297	23.9659	0				2007-07-17	23.5816	30.8009	18.3456	0				2007-07-17	26.1096	30.2536	21.3838	0.0320533
2007-07-18	25.5682	32.933	23.895	0				2007-07-18	17.1844	30.0453	20.8136	0				2007-07-18	26.2793	32.1752	22.4949	0
2007-07-19	25.853	31.8671	23.5443	0				2007-07-19	29.5192	30.3866	21.1786	0				2007-07-19	23.0103	31.0585	22.9586	0.291677
2007-07-20	20.0146	31.082	22.6519	3.7698				2007-07-20	28.3014	31.9616	21.4397	0				2007-07-20	18.5425	31.0101	22.3067	0
2007-07-21	4.19353	20.4533	14.814	8.62396				2007-07-21	26.6868	31.4027	21.0733	0.0499813				2007-07-21	17.1893	28.5656	21.4903	0.106012
2007-07-22	21.8866	20.4016	14.8799	0.0929854				2007-07-22	23.5099	33.6679	21.4144	0.134237				2007-07-22	25.6357	30.9552	20.1256	0
2007-07-23	18.6692	22.6547	15.1086	0.660509				2007-07-23	17.601	34.5074	22.5833	5.89386				2007-07-23	22.8607	30.2189	18.8548	0
2007-07-24	27.8361	28.3098	17.446	0				2007-07-24	21.9425	31.6667	21.0894	0.114938				2007-07-24	26.31	32.0027	21.6887	0
2007-07-25	25.9504	28.0266	18.9363	0				2007-07-25	18.4956	28.6283	19.8273	5.05173				2007-07-25	27.0206	35.1453	23.6891	0.164861
2007-07-26	23.4216	25.2023	19.6858	0.684153				2007-07-26	5.59037	24.849	17.566	15.3959				2007-07-26	23.6348	35.2212	24.1593	2.22866
2007-07-27	18.6421	23.8444	18.4113	3.5926				2007-07-27	9.70729	23.8153	17.7065	27.3819				2007-07-27	18.693	29.2732	21.8573	3.80165
2007-07-28	14.6001	20.3101	16.5654	4.70691				2007-07-28	23.5162	30.1774	18.7741	0.99577				2007-07-28	15.7089	26.5108	19.8649	1.7351
2007-07-29	21.1572	24.0884	16.9545	0.62179				2007-07-29	11.9818	20.988	14.3692	0.768076				2007-07-29	14.5983	25.3922	18.9013	5.62246
2007-07-30	10.3217	21.8852	17.9899	3.34919				2007-07-30	27.5783	27.2124	15.095	0				2007-07-30	18.3695	26.3327	17.5002	0.206371
2007-07-31	16.6314	20.4398	17.6542	1.00302				2007-07-31	10.7624	17.6866	13.7475	0.513361				2007-07-31	24.0215	27.1286	18.1582	0
2007-08-01	18.9943	23.0989	17.7761	0.702768				2007-08-01	15.9763	20.0784	14.3954	0.0695484				2007-08-01	27.0616	33.6935	20.5521	0
2007-08-02	24.342	24.5346	16.2313	0				2007-08-02	19.3573	20.8703	13.6199	4.40849				2007-08-02	28.5915	35.1367	22.895	0
2007-08-03	21.9091	24.043	17.3457	0.0404837				2007-08-03	20.4442	17.3564	13.7247	18.8149				2007-08-03	26.7706	37.1524	24.9054	0
2007-08-04	17.4235	25.426	18.7553	1.84756				2007-08-04	21.2362	20.8709	14.3916	9.07621				2007-08-04	13.7783	29.0811	21.1861	0.0354838
2007-08-05	9.07956	21.8361	17.2229	10.7576				2007-08-05	17.8475	20.1758	14.2849	6.50671				2007-08-05	15.5737	28.1202	19.7122	0.123259
2007-08-06	23.312	23.8768	17.3165	1.03255				2007-08-06	15.8938	20.3867	14.2146	3.10194				2007-08-06	27.3588	34.3415	19.354	0
2007-08-07	21.795	26.3599	17.9789	0				2007-08-07	13.1269	21.3303	15.5796	2.05314				2007-08-07	25.1649	35.8536	24.115	0
2007-08-08	23.9253	28.0616	18.9465	0.284728				2007-08-08	18.6816	25.0707	18.5601	0.288539				2007-08-08	16.7761	31.7659	23.1603	0.28977
2007-08-09	21.8956	28.4785	20.7409	0.775029				2007-08-09	24.0346	28.1213	18.9633	1.68671				2007-08-09	23.8266	33.8675	22.9061	0.745636
2007-08-10	13.2868	24.8541	19.5217	3.20038				2007-08-10	23.5649	28.8352	16.9042	0.807302				2007-08-10	22.4798	33.3617	22.2345	1.13313
2007-08-11	21.1487	25.924	19.6666	1.90402				2007-08-11	25.0036	28.9653	15.6751	0.419139				2007-08-11	24.3851	30.2479	20.8336	2.6738
2007-08-12	18.3529	24.0813	19.1125	1.6297				2007-08-12	20.6253	23.7768	15.4242	0				2007-08-12	25.6819	30.4496	21.0385	0.129399
2007-08-13	23.6253	27.4944	19.6619	0.0477447				2007-08-13	16.7767	25.0419	16.5734	0				2007-08-13	21.1106	31.4125	20.301	0
2007-08-14	20.6297	28.5444	21.1228	1.26843				2007-08-14	15.7448	26.7911	16.5257	0.00957609				2007-08-14	22.5941	32.2756	22.0676	2.11772
2007-08-15	14.3891	25.8407	19.369	0.361257				2007-08-15	21.3463	28.0838	15.8401	0				2007-08-15	18.7577	29.7734	20.5627	3.99674
2007-08-16	22.2481	26.1788	19.269	0				2007-08-16	24.2707	27.5129	17.3339	0.0936956				2007-08-16	18.5418	26.9368	19.2325	5.33403
2007-08-17	24.1924	27.4195	18.606	0				2007-08-17	24.2301	27.0078	17.7436	0.146356				2007-08-17	5.68249	22.6013	16.6256	1.95945
2007-08-18	21.5949	28.6519	19.2477	0.0397379				2007-08-18	10.9657	26.0439	18.1789	0.787441				2007-08-18	12.392	22.3213	14.4982	0.996008
2007-08-19	9.14157	23.6332	16.6307	0				2007-08-19	12.3361	25.0647	16.9481	3.92943				2007-08-19	24.2007	23.0269	13.6547	0
2007-08-20	21.517	26.4853	17.1157	0				2007-08-20	16.8971	24.1774	17.6796	0.818466				2007-08-20	13.0058	20.334	14.0013	1.62158
2007-08-21	4.47008	20.1607	15.1364	13.9187				2007-08-21	21.9224	25.9749	16.6028	0.370349				2007-08-21	16.4853	20.8717	11.283	0
2007-08-22	23.9397	22.6687	14.9809	0				2007-08-22	23.2677	27.3292	16.4923	0.76047				2007-08-22	23.6804	21.8443	14.149	0
2007-08-23	24.1095	25.4063	15.9754	0				2007-08-23	24.9536	27.8966	18.1831	0.355033				2007-08-23	21.7157	22.4627	14.4487	0.0313865
2007-08-24	18.64	24.573	17.208	0.317444				2007-08-24	24.1294	29.1333	18.5993	0.166815				2007-08-24	23.6506	24.1295	15.116	0.00276586
2007-08-25	21.7354	25.1074	16.1226	0.0866658				2007-08-25	7.74335	25.6005	16.7019	0.970269				2007-08-25	24.0802	25.3046	16.2124	0.167121
2007-08-26	23.5231	24.8811	15.1272	0.0265619				2007-08-26	24.6971	29.8886	17.7918	0.0144513				2007-08-26	16.6765	23.0882	15.9228	0.230567
2007-08-27	23.848	27.3041	15.4593	0				2007-08-27	25.6424	29.7689	17.008	0.243292				2007-08-27	19.3225	23.9878	15.1624	1.95843
2007-08-28	23.7272	30.1318	18.3341	0				2007-08-28	22.7439	26.966	17.9414	0				2007-08-28	20.6035	26.0118	15.7582	0
2007-08-29	22.5392	33.0102	19.1259	0				2007-08-29	14.6764	28.9845	18.1153	1.3615				2007-08-29	23.487	29.4241	17.4555	0
2007-08-30	13.1737	27.8837	18.6994	0.981211				2007-08-30	10.7655	25.1699	18.0929	0.556935				2007-08-30	19.9094	29.0185	18.1254	0.495652
2007-08-31	20.5192	28.6685	18.9955	0.0743351				2007-08-31	11.2848	24.5017	16.7551	0.0920156				2007-08-31	16.6834	25.7323	14.7766	0
2007-09-01	9.69561	19.2383	9.51727	1.44311				2007-09-01	8.61152	24.1921	15.3675	0.0681151				2007-09-01	17.4502	25.6543	16.2388	0
2007-09-02	5.54511	16.9409	10.3645	1.33559				2007-09-02	21.7572	25.6004	15.1341	0				2007-09-02	21.9142	25.5532	13.6273	0
2007-09-03	16.5111	18.4491	10.4744	0.0698082				2007-09-03	22.7953	25.7911	16.3421	0				2007-09-03	21.7482	27.6907	16.0797	0
2007-09-04	23.3616	21.4627	10.9392	0				2007-09-04	22.7455	26.273	16.7007	0				2007-09-04	21.2733	29.1909	17.1072	0.244924
2007-09-05	22.6867	24.1046	12.3157	0				2007-09-05	21.46	30.3578	18.2965	0.0585895				2007-09-05	22.9329	31.7704	15.3112	0.413704
2007-09-06	18.6986	24.5721	15.7345	4.8664				2007-09-06	18.0135	29.6911	17.5234	11.1511				2007-09-06	16.0668	22.351	12.2194	0.0758711
2007-09-07	18.8739	22.1829	11.8084	0.005462				2007-09-07	19.2858	25.3189	14.9232	0.588146				2007-09-07	19.6899	24.6353	14.1542	1.76833
2007-09-08	18.2345	22.624	12.3823	0.139897				2007-09-08	19.7785	26.2887	14.6779	0.0824984				2007-09-08	15.6937	25.3109	14.2587	0.264752
2007-09-09	2.81956	17.4576	12.4725	7.63882				2007-09-09	21.0933	21.2178	14.0882	0				2007-09-09	11.7632	22.5912	14.3141	0.296465
2007-09-10	19.6612	22.3143	11.7981	0.197389				2007-09-10	21.6938	24.1453	13.93	0				2007-09-10	21.5274	29.2617	12.6891	0
2007-09-11	14.2885	20.8302	12.1092	0.0807868				2007-09-11	21.7851	25.5842	15.7269	0				2007-09-11	23.025	26.3353	14.6332	0
2007-09-12	20.3285	20.1442	11.3942	0				2007-09-12	20.6648	29.0418	16.8179	0.583342				2007-09-12	18.1508	27.4293	15.018	0.0244121
2007-09-13	13.8245	21.8754	11.081	0.0300712				2007-09-13	6.78841	25.2798	15.0788	0.725201				2007-09-13	19.8007	29.6944	15.9123	0
2007-09-14	20.2114	23.7931	11.3163	0.0225455				2007-09-14	12.9407	23.2928	12.8164	0.183347				2007-09-14	17.6776	29.7707	16.8951	0.0692568
2007-09-15	14.2674	21.5575	13.5053	0.70535				2007-09-15	20.2311	26.2206	14.6257	0				2007-09-15	11.6685	26.0503	15.4872	1.07022
2007-09-16	19.0726	24.0252	12.3429	0.0708801				2007-09-16	5.17745	22.5825	14.5433	2.82578				2007-09-16	21.0966	20.6791	6.41684	0
2007-09-17	20.9549	24.4805	11.9354	0				2007-09-17	16.2434	23.4859	13.0704	0.900921				2007-09-17	20.9182	20.2998	7.67007	0
2007-09-18	19.3727	24.5817	13.3409	0.451713				2007-09-18	17.8131	25.2354	12.1003	0				2007-09-18	18.3416	24.9993	10.6947	0
2007-09-19	5.69044	16.6375	11.5648	1.31482				2007-09-19	18.2595	26.1676	14.2171	0.031716				2007-09-19	20.6412	22.9423	5.63434	0
2007-09-20	12.078	18.8531	11.665	0.178914				2007-09-20	19.5905	23.6649	9.6185	0				2007-09-20	20.9971	15.5678	4.09741	0
2007-09-21	14.8243	20.3615	11.3752	0.0539563				2007-09-21	20.2185	24.6739	11.6667	0				2007-09-21	20.7272	17.9967	4.99381	0
2007-09-22	10.3694	18.0646	9.00809	0				2007-09-22	18.7584	27.1059	14.4139	0				2007-09-22	19.886	21.6349	7.99911	0
2007-09-23	19.5703	20.0874	8.59918	0				2007-09-23	5.30653	21.8117	12.9672	10.429				2007-09-23	19.6804	26.9768	10.1891	0
2007-09-24	19.7476	24.2405	10.252	0				2007-09-24	11.3422	18.1655	9.86972	1.40183				2007-09-24	20.236	28.8707	12.3131	0
2007-09-25	8.83363	22.3546	13.0899	1.47684				2007-09-25	18.2079	23.2807	11.4334	0.12388				2007-09-25	19.9334	25.8549	11.6104	0
2007-09-26	19.1217	24.7648	10.2222	0				2007-09-26	13.2086	22.5031	12.8239	0.0845471				2007-09-26	17.1053	24.8005	13.431	6.54746
2007-09-27	17.4737	22.1933	10.3649	0				2007-09-27	9.36477	19.3464	10.7443	9.35071				2007-09-27	5.30521	16.484	8.56757	1.97929
2007-09-28	13.5547	21.0374	12.8285	0.445118				2007-09-28	2.8257	12.0547	4.9939	5.25536				2007-09-28	18.4284	25.5325	12.7562	0
2007-09-29	11.4197	21.3617	12.8827	0.035856				2007-09-29	6.45077	12.1313	2.61639	0				2007-09-29	17.0376	25.829	11.7713	0.168084
2007-09-30	11.8247	20.9479	13.8355	6.58392				2007-09-30	18.3413	15.9562	4.78693	0				2007-09-30	14.6803	25.0126	11.0914	0.796531
2007-10-01	7.18819	17.9978	8.7655	0.518142				2007-10-01	18.1671	16.8327	5.60837	0				2007-10-01	17.9216	23.3993	13.2479	0.314549
2007-10-02	13.7364	17.9898	7.96326	0				2007-10-02	14.5818	19.9734	7.13446	0				2007-10-02	10.7257	19.167	5.89169	0.235388
2007-10-03	15.6538	16.2672	8.23038	0.125907				2007-10-03	18.1237	18.0426	5.42532	0				2007-10-03	18.3416	18.0662	2.47995	0
2007-10-04	17.202	20.9248	8.04926	0				2007-10-04	15.4134	15.6948	4.78683	0				2007-10-04	17.9109	15.5464	4.13297	0
2007-10-05	16.6473	20.9367	7.92239	0				2007-10-05	17.7203	19.9441	4.74051	0				2007-10-05	17.3316	20.3952	6.32159	0
2007-10-06	15.3023	20.4854	8.72104	0.0166211				2007-10-06	17.2239	22.5319	9.1824	0.0193652				2007-10-06	17.1112	23.813	10.698	0.0151908
2007-10-07	17.0324	22.5213	10.1221	0				2007-10-07	16.1169	22.7789	9.20319	0.0844555				2007-10-07	16.5871	26.3725	11.7188	0.0464857
2007-10-08	14.9478	21.6721	11.7429	0.0113126				2007-10-08	13.7677	19.2957	7.32748	1.84933				2007-10-08	12.775	18.5056	6.9379	0.0227828
2007-10-09	4.55874	17.0377	13.9302	9.6087				2007-10-09	9.55014	9.84949	0.94043	10.8002				2007-10-09	11.9673	14.6428	4.01968	0.0825735
2007-10-10	6.14489	15.8062	6.68365	0.38154				2007-10-10	13.0963	8.82483	1.11557	0.56374				2007-10-10	8.18037	11.9504	4.88602	2.24383
2007-10-11	15.6784	16.2593	5.58884	0				2007-10-11	14.1449	6.70578	1.99008	0				2007-10-11	11.237	12.3935	3.78476	0.112141
2007-10-12	16.2049	17.7376	5.13211	0				2007-10-12	14.6768	12.3148	1.93729	0				2007-10-12	13.2307	13.8109	2.43121	0.0859434
2007-10-13	13.8242	14.1689	2.58221	0				2007-10-13	16.1086	12.8208	-0.0699768	0				2007-10-13	6.52676	9.52261	2.15271	1.5175
2007-10-14	17.0747	11.9254	-0.441376	0				2007-10-14	15.3665	14.2877	1.78015	0				2007-10-14	6.89511	9.09396	-1.82959	0.908981
2007-10-15	16.2795	12.0751	-0.812012	0				2007-10-15	9.268	11.7387	1.41086	0.991609				2007-10-15	6.46562	11.3294	1.5997	0.216283
2007-10-16	16.7205	16.1132	0.929352	0				2007-10-16	1.36609	10.1085	-0.7854	1.88847				2007-10-16	15.9629	12.7522	1.36084	0
2007-10-17	16.1625	19.2057	2.53705	0				2007-10-17	15.2245	15.3928	2.58411	0				2007-10-17	16.1756	16.952	4.1922	0
2007-10-18	10.9382	16.0115	1.22501	0.154553				2007-10-18	14.4133	14.0932	-0.666962	0				2007-10-18	14.2178	15.5001	2.02475	0
2007-10-19	15.0369	7.62131	-3.19061	0				2007-10-19	15.5456	16.9183	3.94803	0				2007-10-19	13.8934	17.9254	3.63635	0
2007-10-20	15.497	10.6884	-2.90094	0				2007-10-20	13.8141	18.2935	2.48498	0				2007-10-20	14.7122	18.6676	3.9061	0
2007-10-21	13.5026	18.029	-2.017	0				2007-10-21	14.8355	17.6028	3.03366	0				2007-10-21	14.7747	15.2708	-0.870087	0
2007-10-22	15.0284	16.8925	2.24506	0				2007-10-22	14.2085	17.5243	2.63751	0				2007-10-22	14.5896	16.9851	2.79324	0
2007-10-23	14.059	20.4732	3.72626	0				2007-10-23	14.4774	23.0833	5.67188	0				2007-10-23	14.1712	18.9702	2.67435	0.691443
2007-10-24	13.6784	15.7341	2.64224	0.146707				2007-10-24	11.1011	12.3552	-2.48566	0.0445349				2007-10-24	14.3577	17.4924	2.35446	0.00877503
2007-10-25	9.38466	10.9024	2.45731	0.136721				2007-10-25	14.7595	6.98593	-3.23556	0				2007-10-25	12.403	15.6324	2.75461	0
2007-10-26	12.5876	13.4589	1.53632	0.0279386				2007-10-26	13.2508	14.0126	-2.30633	0				2007-10-26	8.94219	13.3857	3.0863	0.0961077
2007-10-27	13.6182	16.3237	0.693573	0.00852649				2007-10-27	13.7458	13.4915	-2.00607	0				2007-10-27	5.5403	11.7992	1.81628	0.209995
2007-10-28	12.7803	13.8796	1.17526	0				2007-10-28	12.1422	14.3111	0.160065	0.0815815				2007-10-28	7.96041	10.98	1.5314	2.94008
2007-10-29	13.7263	13.0506	-1.06677	0				2007-10-29	12.3636	13.7866	-0.361908	0				2007-10-29	7.07839	6.48386	-4.50134	2.55732
2007-10-30	13.8157	8.46954	-2.48209	0				2007-10-30	13.3674	12.5981	-0.274597	0				2007-10-30	9.73737	5.67465	-4.32428	0.0127202
2007-10-31	14.3698	7.22849	-3.47461	0				2007-10-31	13.2543	13.2347	0.408325	0				2007-10-31	13.2062	6.2092	-3.608	0.0339583
2007-11-01	12.8338	13.5527	-2.33462	0				2007-11-01	9.81188	14.221	3.21109	0.880039				2007-11-01	13.1502	6.34586	-6.4967	0
2007-11-02	11.6926	15.5048	0.851807	0				2007-11-02	11.5758	12.126	0.382324	0.123939				2007-11-02	12.8551	8.89517	-6.01129	0
2007-11-03	12.1544	15.2675	2.8226	0				2007-11-03	11.8843	9.51962	-4.41226	0				2007-11-03	10.7856	9.43475	-3.90085	0
2007-11-04	10.9151	19.055	-3.57227	0.692672				2007-11-04	12.8413	8.96899	-3.28558	0				2007-11-04	11.2767	10.0105	-1.87778	0.0311031
2007-11-05	13.189	6.20627	-4.237	0				2007-11-05	12.1791	14.243	0.111084	0				2007-11-05	12.2408	11.3908	-0.454437	0.0377338
2007-11-06	12.3314	5.15897	-1.15265	0				2007-11-06	10.5795	17.1686	2.40476	0				2007-11-06	11.1865	12.0413	0.8414	0
2007-11-07	11.3631	8.80057	-0.956818	0				2007-11-07	10.8232	17.8309	3.09695	0				2007-11-07	11.5982	8.00485	-4.75034	0
2007-11-08	8.7293	9.63709	-0.871368	0.0413605				2007-11-08	7.49046	13.4064	2.70636	0				2007-11-08	11.9672	2.74225	-6.03485	0
2007-11-09	9.85538	11.5839	-0.0331726	0				2007-11-09	8.48026	7.77258	-1.41403	0.244669				2007-11-09	12.0981	5.49972	-3.92273	0
2007-11-10	6.52117	11.0416	0.00582886	0.132814				2007-11-10	11.634	2.33356	-6.25012	0				2007-11-10	12.3013	5.23285	-5.17667	0
2007-11-11	10.7973	10.8391	-0.67572	0				2007-11-11	11.879	8.4165	-4.49863	0				2007-11-11	12.092	2.84293	-5.76096	0
2007-11-12	10.5546	18.6234	2.33511	0				2007-11-12	11.5475	10.5805	-2.80429	0				2007-11-12	9.915	3.93301	-4.72214	0
2007-11-13	9.69229	16.1166	2.08377	0				2007-11-13	10.1912	8.30035	-1.76645	0				2007-11-13	10.3322	7.03095	-3.73111	0
2007-11-14	9.45665	16.9176	0.964325	0.0831404				2007-11-14	8.7123	11.6202	-2.05176	0				2007-11-14	10.753	5.03738	-4.36569	0
2007-11-15	0.98777	2.28238	-4.48001	0.211811				2007-11-15	10.2832	2.86517	-3.3859	0				2007-11-15	10.0079	1.23383	-6.90839	0
2007-11-16	11.4346	1.34061	-4.5134	0				2007-11-16	8.79196	6.06668	-4.35336	0				2007-11-16	10.8323	0.724579	-8.80502	0
2007-11-17	11.273	3.18192	-3.28665	0				2007-11-17	9.89994	10.6051	-0.476654	0				2007-11-17	10.6296	1.18912	-7.64771	0
2007-11-18	9.80266	4.89526	-2.40753	0				2007-11-18	10.329	5.11743	-1.84985	0				2007-11-18	10.5408	2.46567	-7.00012	0
2007-11-19	10.4979	5.20187	-1.79804	0				2007-11-19	9.98326	3.57175	-4.81235	0				2007-11-19	10.5673	5.20126	-5.09689	0
2007-11-20	9.34846	7.12082	-2.31903	0				2007-11-20	10.3981	0.874847	-7.13452	0				2007-11-20	10.2854	7.48471	-3.13989	0
2007-11-21	9.96222	10.4873	-0.940613	0.0179229				2007-11-21	10.4401	3.65524	-7.64835	0				2007-11-21	10.1093	9.29196	-1.40106	0
2007-11-22	7.16459	6.61939	-4.70859	0.0173273				2007-11-22	9.82635	1.47907	-9.4548	0				2007-11-22	4.39623	5.48636	-6.82114	0
2007-11-23	10.6307	-0.275177	-7.89761	0				2007-11-23	10.2109	-1.32346	-8.90457	0				2007-11-23	9.51057	-1.53049	-9.58884	0
2007-11-24	10.1167	-0.810242	-8.76291	0.0466479				2007-11-24	10.4734	-0.0450439	-8.60403	0				2007-11-24	9.91904	-2.51877	-9.66711	0
2007-11-25	1.24032	0.735443	-6.21146	0.0124063				2007-11-25	7.4736	2.70901	-6.40436	0				2007-11-25	8.03094	-1.30472	-9.43185	0
2007-11-26	9.74647	2.62332	-7.12619	0				2007-11-26	9.6765	5.22379	-4.15527	0				2007-11-26	9.59135	-1.0592	-8.73529	0
2007-11-27	10.1002	4.61731	-5.10471	0				2007-11-27	9.48772	4.73721	-4.82822	0				2007-11-27	9.32999	-0.134399	-8.61246	0
2007-11-28	7.35732	0.28186	-9.04538	0.0768547				2007-11-28	8.9995	0.191589	-9.9165	0.0105138				2007-11-28	9.44665	0.698731	-7.52048	0
2007-11-29	6.64039	-2.46445	-11.0134	0.00864766				2007-11-29	9.50821	-4.70606	-13.4795	0				2007-11-29	6.32522	1.95129	-4.98053	0.00891518
2007-11-30	7.65011	-1.41901	-10.4216	0				2007-11-30	9.75979	-5.46768	-12.607	0				2007-11-30	8.13064	0.613525	-6.43567	0
2007-12-01	6.47442	-0.598053	-6.70834	0				2007-12-01	9.43404	-4.46164	-13.0849	0				2007-12-01	9.39492	4.81454	-5.94196	0
2007-12-02	5.59909	-0.486938	-8.67633	0				2007-12-02	9.95289	2.33032	-8.28558	0				2007-12-02	9.30484	2.33017	-6.67685	0
2007-12-03	6.713	-0.314392	-11.06	0				2007-12-03	8.4069	-2.45593	-9.46747	0				2007-12-03	8.63755	0.901611	-7.54034	0
2007-12-04	9.43323	-2.43301	-12.4011	0				2007-12-04	9.44887	-0.933533	-10.0968	0				2007-12-04	9.1396	5.92645	-5.121	0
2007-12-05	8.21341	-0.11087	-10.7674	0				2007-12-05	9.60314	-0.0137634	-10.6866	0				2007-12-05	8.53459	-2.14569	-8.40009	0
2007-12-06	7.42329	2.25775	-8.30768	0				2007-12-06	8.75412	-4.06302	-12.5833	0				2007-12-06	8.93977	-0.191284	-9.05267	0
2007-12-07	8.58649	2.11227	-6.37128	0				2007-12-07	9.36906	-0.335968	-11.8898	0				2007-12-07	9.01148	2.35263	-7.03339	0
2007-12-08	8.9539	2.38257	-8.29614	0				2007-12-08	8.28112	0.912811	-9.74536	0				2007-12-08	8.74454	6.285	-5.02988	0
2007-12-09	8.88905	4.60593	-6.79062	0				2007-12-09	7.27454	-0.78363	-8.9025	0.0299077				2007-12-09	8.62155	5.00769	-5.92667	0
2007-12-10	6.90606	2.80917	-5.2999	0.0205783				2007-12-10	8.92223	-2.52872	-10.8636	0				2007-12-10	8.59137	5.36633	-3.76733	0
2007-12-11	1.03912	0.941101	-5.49075	0.0621776				2007-12-11	8.61769	-0.634369	-10.4992	0				2007-12-11	6.55028	5.98694	-5.91672	0.0627845
2007-12-12	4.76172	-0.58609	-10.4066	0.532506				2007-12-12	8.46966	2.39719	-8.49258	0				2007-12-12	8.57765	1.25433	-7.31811	0
2007-12-13	8.78589	-3.64795	-11.6064	0				2007-12-13	8.50773	2.92157	-7.82871	0				2007-12-13	8.94567	4.40256	-5.84769	0
2007-12-14	9.52984	-0.648956	-12.329	0				2007-12-14	7.26982	0.395172	-9.27078	0				2007-12-14	8.1465	1.70474	-6.71826	0
2007-12-15	6.54075	-0.0189514	-10.7895	0				2007-12-15	8.73822	1.16229	-9.35867	0				2007-12-15	5.52233	-0.0343323	-7.76547	0
2007-12-16	8.14037	-1.29596	-9.91663	0				2007-12-16	8.28538	4.357	-8.09833	0				2007-12-16	8.46659	0.718964	-8.83823	0
2007-12-17	6.97738	1.92856	-10.2408	0				2007-12-17	8.21641	5.4227	-6.72336	0				2007-12-17	8.68282	3.13144	-8.39288	0
2007-12-18	8.41267	4.72192	-8.26129	0				2007-12-18	8.54309	-1.85175	-10.5201	0				2007-12-18	8.62331	1.0087	-9.61441	0
2007-12-19	7.00338	3.58224	-4.44693	0				2007-12-19	7.16704	-0.249176	-11.4351	0				2007-12-19	8	4.84201	-6.13849	0
2007-12-20	5.43975	2.65286	-5.12216	0.150009				2007-12-20	8.10664	-8.16724	-16.3585	0				2007-12-20	5.14061	1.85577	-6.93564	0.0319107
2007-12-21	0.129593	-0.665955	-9.32626	0.787517				2007-12-21	8.81234	-1.16058	-14.1956	0				2007-12-21	5.1224	5.18805	-4.03153	0
2007-12-22	1.53159	-5.66815	-13.2149	1.5225				2007-12-22	8.4898	-1.64954	-10.9251	0				2007-12-22	8.06877	2.75052	-6.13419	0
2007-12-23	0.965145	-11.2127	-16.9066	0				2007-12-23	8.6432	1.56229	-9.71652	0				2007-12-23	5.06269	2.85748	-6.4444	0
2007-12-24	8.42622	-10.6465	-19.1545	0				2007-12-24	8.48144	4.6543	-7.32986	0				2007-12-24	8.16447	2.99735	-7.18204	0
2007-12-25	8.8461	-13.0917	-20.5821	0				2007-12-25	8.70564	1.38965	-8.59198	0				2007-12-25	7.18888	2.6026	-7.76035	0
2007-12-26	8.51934	-7.07901	-18.1593	0				2007-12-26	7.80804	3.33758	-9.28772	0				2007-12-26	4.46901	-1.41388	-9.55167	0
2007-12-27	8.94937	-6.4122	-17.176	0				2007-12-27	8.80707	-4.32016	-13.6474	0				2007-12-27	8.87483	1.97473	-9.65561	0
2007-12-28	8.60956	-3.85526	-17.1525	0				2007-12-28	9.01165	-5.38586	-15.4628	0				2007-12-28	8.82695	4.39484	-8.71008	0
2007-12-29	9.17482	-2.63635	-15.1651	0				2007-12-29	7.83756	0.7547	-11.1034	0				2007-12-29	4.00284	1.54483	-9.42441	0
2007-12-30	9.48521	-1.67615	-14.3628	0				2007-12-30	8.35984	-1.44122	-12.1098	0				2007-12-30	6.58424	-0.362335	-10.8049	0.0111642
2007-12-31	8.74869	1.582	-12.3526	0				2007-12-31	8.4608	-4.98016	-16.0941	0				2007-12-31	6.87958	0.219788	-9.48441	0
2008-01-01	7.95158	1.51361	-10.0664	0				2008-01-01	8.8444	0.475739	-10.1079	0				2008-01-01	6.30284	2.1355	-8.42227	0
2008-01-02	7.34435	-1.15836	-11.4752	0				2008-01-02	7.75308	3.94162	-7.42197	0				2008-01-02	3.8833	-2.61093	-11.4353	0
2008-01-03	8.16892	4.23111	-8.19815	0				2008-01-03	7.93618	5.00064	-5.59695	0				2008-01-03	6.41832	-2.69272	-11.971	0
2008-01-04	6.46962	1.00714	-9.77005	0				2008-01-04	6.43215	6.3971	-5.3819	0				2008-01-04	6.4797	-3.14356	-12.7366	0
2008-01-05	2.32266	-4.71243	-13.8638	0.0347537				2008-01-05	7.72175	7.3446	-2.35873	0				2008-01-05	5.43576	-1.37381	-11.5478	0
2008-01-06	8.35513	-4.6102	-15.363	0				2008-01-06	6.10759	6.72788	-2.38885	0				2008-01-06	8.17168	-0.327728	-9.70908	0
2008-01-07	8.07853	3.0907	-11.6862	0				2008-01-07	3.84697	4.44022	-3.86862	0				2008-01-07	8.662	-0.960388	-9.57993	0
2008-01-08	5.85583	-1.21527	-12.179	0				2008-01-08	4.53751	-0.412079	-8.56692	0				2008-01-08	6.97867	-1.89212	-11.4994	0
2008-01-09	3.0426	-4.52176	-13.4455	0				2008-01-09	3.38815	-2.86014	-12.3273	0				2008-01-09	6.07701	-0.887451	-10.8621	0
2008-01-10	7.17384	-6.87241	-15.0043	0				2008-01-10	6.93223	-7.11102	-16.3949	0				2008-01-10	7.93744	-0.106537	-9.31815	0
2008-01-11	6.69324	-5.08261	-14.7239	0				2008-01-11	9.69101	-10.2343	-18.3815	0				2008-01-11	7.34571	-3.3205	-12.6611	0
2008-01-12	9.18141	-7.31784	-17.8825	0				2008-01-12	10.03	-8.2814	-19.5306	0				2008-01-12	9.73435	-1.08887	-12.7186	0
2008-01-13	9.55411	-9.11267	-19.0734	0				2008-01-13	9.74263	-7.88061	-18.2623	0				2008-01-13	9.15595	-0.27005	-12.7594	0
2008-01-14	9.1465	-9.84024	-19.6716	0				2008-01-14	9.54401	-5.4693	-16.4915	0				2008-01-14	9.49245	0.136963	-10.9575	0
2008-01-15	9.34152	-6.64087	-20.4426	0				2008-01-15	10.354	-3.45633	-16.174	0				2008-01-15	9.12442	1.70264	-10.7253	0
2008-01-16	9.23105	-7.49951	-17.5721	0				2008-01-16	8.33841	-0.841522	-13.739	0				2008-01-16	9.35716	-0.250244	-11.3121	0
2008-01-17	9.32104	-6.69968	-17.5875	0				2008-01-17	8.85591	2.19205	-11.3234	0				2008-01-17	7.66007	0.146851	-11.5535	0
2008-01-18	3.3282	-8.48749	-15.9671	0.621794				2008-01-18	0.929773	0.258118	-8.37878	0.229704				2008-01-18	9.84727	1.09671	-8.76233	0
2008-01-19	5.75489	-7.3746	-13.88	0.0626922				2008-01-19	8.2371	2.77612	-8.40091	0				2008-01-19	9.82763	2.73447	-6.11353	0
2008-01-20	0.552042	-8.11124	-17.5844	1.71751				2008-01-20	9.14829	3.64865	-8.20123	0				2008-01-20	9.89183	2.5621	-4.75619	0
2008-01-21	10.2162	-12.4591	-19.2374	0				2008-01-21	10.0893	-5.40262	-12.2913	0				2008-01-21	10.2501	5.89139	-6.17563	0
2008-01-22	10.8149	-14.3114	-20.8058	0				2008-01-22	9.50214	-2.38248	-13.5187	0				2008-01-22	9.92682	2.9068	-7.34683	0
2008-01-23	10.7067	-10.0107	-20.852	0				2008-01-23	10.4813	-1.63925	-11.7276	0				2008-01-23	10.3354	-0.104126	-9.96133	0
2008-01-24	11.4631	-8.73151	-17.6224	0				2008-01-24	9.72406	4.03781	-8.26077	0				2008-01-24	10.768	-2.04138	-12.1959	0
2008-01-25	10.1532	-0.90918	-16.4527	0				2008-01-25	7.65286	2.17914	-8.08127	0				2008-01-25	10.5684	0.58078	-10.2424	0
2008-01-26	10.9665	-2.58429	-14.0388	0				2008-01-26	9.61099	0.790588	-10.1771	0				2008-01-26	11.1283	0.400665	-10.9898	0
2008-01-27	9.80993	-1.4863	-14.1475	0.103247				2008-01-27	10.1998	-0.513763	-10.1143	0.0420199				2008-01-27	6.41945	2.02319	-10.5426	0
2008-01-28	10.0331	-6.74957	-13.9031	0				2008-01-28	10.5294	1.50452	-10.8968	0				2008-01-28	11.463	3.20703	-8.35819	0
2008-01-29	10.0331	-6.65671	-13.9163	0				2008-01-29	10.5294	4.85669	-8.16846	0				2008-01-29	11.463	4.73987	-6.14175	0
2008-01-30	11.6607	-0.663025	-15.1921	0				2008-01-30	11.1353	2.93213	-7.75748	0				2008-01-30	9.86968	7.01688	-5.3121	0
2008-01-31	11.7354	0.657959	-11.8175	0				2008-01-31	5.72745	9.01541	-4.48883	0				2008-01-31	11.037	8.75363	-3.84006	0
2008-02-01	10.7716	-4.69592	-14.7679	0				2008-02-01	11.8219	6.56754	-4.8721	0				2008-02-01	11.7183	-2.24674	-13.4153	0
2008-02-02	11.7219	-4.58536	-16.5659	0				2008-02-02	11.7211	0.306152	-9.61563	0				2008-02-02	4.12015	-5.71988	-16.8195	0.10069
2008-02-03	9.95524	-2.54785	-15.7566	0				2008-02-03	11.4976	2.26749	-10.016	0				2008-02-03	12.4514	0.325653	-14.7763	0
2008-02-04	10.5257	-1.32822	-13.0978	0				2008-02-04	12.5898	4.63031	-6.80872	0				2008-02-04	12.2026	2.28616	-9.95139	0
2008-02-05	9.27212	2.60492	-12.1473	0				2008-02-05	12.3428	6.48981	-5.43616	0				2008-02-05	10.9747	-4.20493	-15.3056	0.0194241
2008-02-06	11.7466	5.0051	-7.84225	0				2008-02-06	11.9212	2.9249	-6.13211	0				2008-02-06	10.1813	-4.52307	-17.4821	0
2008-02-07	11.3949	5.33066	-6.47214	0				2008-02-07	12.5896	4.86359	-5.52451	0				2008-02-07	13.1465	1.97745	-10.8634	0
2008-02-08	8.5069	-4.89017	-9.73093	0.0750058				2008-02-08	12.4149	7.14908	-4.6539	0				2008-02-08	12.9075	5.21375	-9.15503	0
2008-02-09	3.2698	-2.7544	-10.3804	0.277978				2008-02-09	12.4531	5.43903	-7.72833	0				2008-02-09	12.1743	8.49243	-4.28922	0
2008-02-10	0.180284	-4.91602	-11.2199	0.842341				2008-02-10	12.5524	-0.83136	-11.4386	0				2008-02-10	12.2922	4.50446	-6.04816	0
2008-02-11	3.08032	-3.32791	-11.3165	0.539805				2008-02-11	12.3632	5.74609	-9.26382	0				2008-02-11	8.87124	2.73981	-7.86587	0.0190152
2008-02-12	6.94592	-1.383	-9.39346	0.0312355				2008-02-12	11.4363	10.3803	-2.21185	0				2008-02-12	7.07904	0.278198	-10.5088	0.0825099
2008-02-13	7.20577	-1.06753	-8.11664	0.0587485				2008-02-13	12.5687	10.4902	-0.313751	0				2008-02-13	6.18547	1.59232	-10.6209	0.1875
2008-02-14	7.57815	-2.5665	-11.565	0.0877018				2008-02-14	8.21357	7.95435	-3.9036	0				2008-02-14	8.55308	4.6398	-6.27771	0.0207887
2008-02-15	7.20761	-0.45285	-12.6492	0.172993				2008-02-15	13.5759	6.25754	-6.21481	0				2008-02-15	13.4645	1.96774	-8.54349	0.00573869
2008-02-16	13.7788	-6.08725	-15.4487	0				2008-02-16	12.9381	7.70239	-3.93643	0.0186717				2008-02-16	11.9612	-2.16052	-10.9617	0
2008-02-17	11.5581	-8.71872	-18.7947	0				2008-02-17	7.58512	0.60321	-7.98706	0.193816				2008-02-17	12.3293	3.01593	-9.98911	0.740037
2008-02-18	14.1173	-2.29865	-18.1989	0				2008-02-18	12.7431	4.71994	-6.36984	0				2008-02-18	10.6899	5.6467	-6.30206	0.0168479
2008-02-19	13.8178	-3.22708	-15.7492	0				2008-02-19	10.4257	4.15863	-6.90378	0				2008-02-19	11.1507	0.349579	-9.02832	0
2008-02-20	14.5795	-0.562012	-17.032	0				2008-02-20	13.8022	5.3208	-4.38187	0				2008-02-20	13.6668	3.82217	-7.40097	0
2008-02-21	15.7174	-0.921844	-7.89383	0.0278513				2008-02-21	15.422	9.06116	-2.3609	0				2008-02-21	16.0261	4.45041	-5.98502	0
2008-02-22	9.11205	-0.783417	-8.93146	0.0967321				2008-02-22	12.158	13.2867	-1.6535	0				2008-02-22	14.2802	8.54855	-3.21902	0
2008-02-23	13.6914	5.6524	-4.51102	0				2008-02-23	13.5992	12.9844	-1.20938	0				2008-02-23	15.4639	17.6344	-3.41727	0
2008-02-24	13.1597	8.34457	-5.21075	0				2008-02-24	14.5569	9.43451	0.813507	0				2008-02-24	12.2812	7.55392	-4.40512	0
2008-02-25	16.1701	8.66745	-5.4989	0				2008-02-25	12.9201	6.39151	-3.60117	0.217506				2008-02-25	16.2532	15.5729	-0.395508	0
2008-02-26	15.2582	6.58624	-4.93085	0				2008-02-26	11.2833	6.12289	-3.66589	0				2008-02-26	9.2433	7.97498	-2.28299	0.0064092
2008-02-27	9.34842	8.05728	-3.77371	0.0272888				2008-02-27	14.636	11.1949	-2.59302	0				2008-02-27	14.8364	7.87094	-2.00662	0.0167051
2008-02-28	14.4881	5.54034	-3.13727	0.248612				2008-02-28	10.3684	2.784	-5.26047	0.053589				2008-02-28	12.5088	10.0756	-2.61731	0
2008-02-29	8.91036	5.54034	-3.13727	0.212969				2008-02-29	17.2753	2.784	-5.26047	0				2008-02-29	16.3961	10.0756	-2.61731	0
2008-03-01	0.0858682	2.16788	-3.63495	1.16269				2008-03-01	15.3186	10.4008	-4.57739	0				2008-03-01	17.0529	13.4939	0.922089	0
2008-03-02	11.0947	4.38815	-4.52133	0				2008-03-02	9.38699	10.7997	-1.38608	0.958711				2008-03-02	16.6638	14.0262	-0.505463	0
2008-03-03	12.2327	5.98599	-4.63034	0				2008-03-03	16.722	3.25455	-5.15588	0				2008-03-03	17.5451	11.5442	-0.635315	0
2008-03-04	14.0188	6.88141	-5.03076	0				2008-03-04	16.4943	6.35574	-6.21875	0				2008-03-04	16.4414	13.9536	1.54581	0
2008-03-05	13.2233	4.17011	-5.81717	0.00426021				2008-03-05	17.6256	11.7211	-3.25705	0				2008-03-05	14.5375	18.1833	1.26331	0
2008-03-06	15.1276	8.57089	-7.64822	0.0663948				2008-03-06	16.6058	12.157	-1.23508	0				2008-03-06	17.8881	17.3318	4.32709	0
2008-03-07	17.319	0.118286	-9.90503	0				2008-03-07	12.3002	14.0459	2.53253	0				2008-03-07	17.2672	20.6002	6.49304	0
2008-03-08	18.8578	5.52231	-3.94125	0				2008-03-08	14.735	16.274	0.560211	0.00115327				2008-03-08	13.4311	18.5915	-0.831482	0.33584
2008-03-09	18.9059	0.171875	-5.40051	0				2008-03-09	10.8043	12.4163	-1.65552	0.537691				2008-03-09	9.71845	6.49933	-4.95938	4.40301
2008-03-10	18.5487	6.0853	-4.30215	0				2008-03-10	5.87341	7.76602	-3.64236	0.830636				2008-03-10	15.6236	8.7912	-3.04565	0.0369973
2008-03-11	18.37	5.67499	-3.26129	0.0212263				2008-03-11	12.617	-1.68539	-9.49298	0.00606205				2008-03-11	17.0846	12.7	2.63205	0.0237044
2008-03-12	10.7919	8.24207	-2.65564	0.382693				2008-03-12	18.1716	2.03555	-9.31235	0				2008-03-12	16.7729	11.7881	1.05096	0
2008-03-13	19.4975	5.08377	-3.73657	0				2008-03-13	16.9927	7.53485	-3.39667	0				2008-03-13	17.8254	11.7824	0.374786	0.0242425
2008-03-14	17.1828	13.4478	-1.23541	0.0152964				2008-03-14	19.2394	9.49759	-1.15292	0				2008-03-14	18.3426	5.84616	-3.98132	0
2008-03-15	8.02283	10.0353	-0.819366	0.551054				2008-03-15	18.4476	16.0409	2.13351	0.0276536				2008-03-15	20.6699	6.08841	-4.36343	0.0606632
2008-03-16	20.382	9.26233	-1.67709	0				2008-03-16	13.3538	10.6797	1.00424	0.266154				2008-03-16	13.5867	8.67621	-2.0235	0.0528854
2008-03-17	19.7261	17.3355	0.310852	0				2008-03-17	6.87064	11.1017	1.56564	0.354344				2008-03-17	19.7645	11.518	-0.264404	0.0201162
2008-03-18	20.4152	19.7218	-0.565186	0				2008-03-18	12.4118	6.93839	-2.90674	0.0625234				2008-03-18	18.5691	13.1143	0.403595	0.564955
2008-03-19	18.0497	18.0228	1.13849	0.0379406				2008-03-19	15.9758	9.27927	-1.58752	0				2008-03-19	4.26617	9.77368	0.918793	0.976801
2008-03-20	6.63489	14.065	3.27878	0.111142				2008-03-20	16.4647	6.88672	-1.75415	0.0387853				2008-03-20	18.968	12.6552	2.91525	0.093053
2008-03-21	11.1103	10.5659	-1.42078	0.0191863				2008-03-21	17.5301	7.26724	-2.30545	0.0236931				2008-03-21	6.50711	7.00909	0.00674439	0.79216
2008-03-22	20.1906	4.61841	-2.08124	0				2008-03-22	20.8557	11.2755	1.22302	0.335656				2008-03-22	20.0403	6.4379	-0.92099	0
2008-03-23	19.3094	12.5577	-0.558868	0				2008-03-23	17.1107	12.423	-0.192078	0				2008-03-23	17.5826	7.27054	-1.54068	0
2008-03-24	15.7873	11.0293	-0.628967	0.119904				2008-03-24	14.9779	10.7217	-1.50009	0.127351				2008-03-24	17.2451	8.49228	-0.721832	0.0834743
2008-03-25	20.1285	13.8909	-1.49561	0				2008-03-25	17.8663	10.8493	-3.87912	0				2008-03-25	11.1964	8.6135	-2.13916	0.191656
2008-03-26	22.476	8.26254	-1.87668	0				2008-03-26	21.8075	8.07309	-2.91763	0.0446297				2008-03-26	16.5443	12.0244	-0.514435	0.0889232
2008-03-27	21.1054	15.2242	-0.0303345	0				2008-03-27	7.3333	7.59964	-2.49066	0.900208				2008-03-27	5.35703	9.86066	0.325409	0.840095
2008-03-28	19.6008	18.6634	1.466	0				2008-03-28	17.8638	11.752	0.194122	0				2008-03-28	15.5419	7.79669	-1.88278	0.060534
2008-03-29	20.0781	18.1376	4.37576	0.0286665				2008-03-29	20.6807	12.4906	0.447968	0				2008-03-29	21.7508	9.85861	-1.07635	0
2008-03-30	12.5942	11.0666	1.84012	0.814453				2008-03-30	21.5776	15.1715	2.47702	0				2008-03-30	23.2855	12.6097	0.420563	0
2008-03-31	18.6677	12.5055	0.846252	0.0272169				2008-03-31	20.3822	8.09674	-1.86624	0				2008-03-31	22.0802	16.0718	5.20895	0
2008-04-01	24.2969	16.009	1.48035	0				2008-04-01	24.4264	13.0071	1.45316	0				2008-04-01	22.3285	19.0156	5.35147	0
2008-04-02	21.508	9.67239	-1.61054	0				2008-04-02	23.066	17.7453	3.66672	0				2008-04-02	20.6869	15.2054	2.48935	0
2008-04-03	24.2716	11.389	-1.3898	0				2008-04-03	24.5084	20.7061	5.01779	0				2008-04-03	14.4404	13.7795	1.39368	0.0239909
2008-04-04	21.0826	18.0343	1.7193	0				2008-04-04	22.7616	22.9599	10.4737	0				2008-04-04	19.4265	18.8023	5.10046	0.141739
2008-04-05	21.567	18.6665	3.85297	0.00176923				2008-04-05	15.0239	20.9687	4.56116	0.0514809				2008-04-05	24.2794	15.2575	2.37826	0
2008-04-06	22.8632	15.4764	0.671387	0				2008-04-06	23.4498	16.1861	4.35226	0				2008-04-06	23.958	17.7716	4.52893	0
2008-04-07	23.3261	9.26108	-0.461365	0				2008-04-07	20.2177	23.9695	9.15341	0.0809853				2008-04-07	23.2891	25.8051	10.6867	0
2008-04-08	17.4643	17.4013	0.747803	0.124337				2008-04-08	9.19401	15.8912	5.08197	0.0414714				2008-04-08	19.5905	25.315	10.5625	0.0272819
2008-04-09	16.6161	7.91235	-0.443451	14.7291				2008-04-09	11.7508	12.9622	2.49609	0.152289				2008-04-09	8.98374	16.3632	7.97781	14.8304
2008-04-10	15.0983	10.0346	-0.430298	0.10634				2008-04-10	16.4798	19.0854	8.42691	0.171495				2008-04-10	17.0847	22.2527	7.44113	0.126455
2008-04-11	20.2686	12.1352	0.928131	0.13981				2008-04-11	19.2702	20.9024	8.06799	0.0120605				2008-04-11	19.711	11.7246	-2.30603	0.0748966
2008-04-12	25.1948	16.1382	0.768036	0				2008-04-12	14.864	16.9096	5.61105	1.07498				2008-04-12	25.2106	8.54013	-1.77234	0
2008-04-13	20.9313	19.7899	7.36322	0.0326992				2008-04-13	7.24909	10.1522	1.147	0.504677				2008-04-13	25.0774	15.3549	3.16412	0
2008-04-14	18.4442	14.856	7.12824	0.052596				2008-04-14	24.0726	13.5144	0.113342	0				2008-04-14	24.1089	22.413	8.80319	0
2008-04-15	17.2169	16.0744	3.17593	0.00920999				2008-04-15	26.5923	13.9085	0.228912	0				2008-04-15	23.6319	23.8009	7.82483	0
2008-04-16	25.5104	16.1711	3.53696	0				2008-04-16	24.8372	17.2019	4.65903	0				2008-04-16	23.5136	20.6003	7.6872	0
2008-04-17	24.7683	19.62	4.6665	0				2008-04-17	26.401	20.206	5.42496	0				2008-04-17	19.0875	22.5722	8.92722	0.0119034
2008-04-18	21.8723	22.6169	8.65366	0.0532737				2008-04-18	24.1594	24.3483	10.2829	0.0873796				2008-04-18	21.55	21.84	12.5839	0.0399976
2008-04-19	20.1198	13.3218	5.38403	0				2008-04-19	2.94563	14.2814	7.79794	2.58606				2008-04-19	15.13	17.5813	8.43271	0.119987
2008-04-20	18.2742	12.5473	4.78388	0.0405765				2008-04-20	21.0514	20.9802	8.63327	0.555173				2008-04-20	25.4123	17.2357	8.26465	0
2008-04-21	17.1733	7.18314	0.347107	17.0325				2008-04-21	24.231	22.1723	9.7373	0				2008-04-21	25.2227	21.0797	10.3307	0
2008-04-22	26.3987	12.376	2.25601	0				2008-04-22	13.655	17.8046	7.25424	0.252092				2008-04-22	23.7321	23.3587	11.6708	0
2008-04-23	26.1361	19.8495	3.6329	0				2008-04-23	22.3821	13.7129	-0.700836	0.170347				2008-04-23	23.9126	21.8874	4.69522	0.0333706
2008-04-24	21.8985	21.8232	10.7276	0.300724				2008-04-24	25.3822	11.442	-0.91275	0				2008-04-24	25.8784	15.381	4.79392	0
2008-04-25	15.811	16.25	7.81659	0.0304738				2008-04-25	25.6354	19.3853	5.08688	0				2008-04-25	24.8757	15.7723	5.72031	0
2008-04-26	17.5824	17.6545	6.97079	0.00214923				2008-04-26	22.7002	21.7469	7.48099	0				2008-04-26	25.41	18.6356	6.76831	0
2008-04-27	25.5249	22.6428	8.12705	0.0292258				2008-04-27	25.1507	25.5458	12.3808	0.0966576				2008-04-27	23.1535	19.3696	8.50915	0
2008-04-28	23.1076	25.6775	14.1139	0.0491419				2008-04-28	22.4068	28.1969	14.2974	0				2008-04-28	27.2636	22.1333	11.2035	0
2008-04-29	15.9948	15.3322	3.16281	0.192745				2008-04-29	11.9564	20.4797	9.28232	1.30878				2008-04-29	26.6003	28.144	15.1063	0
2008-04-30	25.2278	13.4396	2.9848	0				2008-04-30	26.4023	20.2085	9.21786	0				2008-04-30	26.3394	27.3692	16.8122	0.0291816
2008-05-01	23.2509	19.8354	8.73621	0				2008-05-01	26.8142	21.8885	8.18149	0				2008-05-01	25.283	27.3178	6.90741	0.0431364
2008-05-02	21.5674	22.8119	9.70486	0.104066				2008-05-02	13.2899	13.2819	3.96896	0.0266811				2008-05-02	26.9664	12.4157	0.61026	0
2008-05-03	17.0516	10.0859	3.23074	0.258761				2008-05-03	26.261	20.6546	6.83548	0				2008-05-03	26.9588	18.1912	7.08035	0
2008-05-04	29.5282	13.7561	3.26593	0				2008-05-04	26.4734	26.3438	11.1507	0				2008-05-04	24.499	27.1279	14.6337	0
2008-05-05	25.2156	19.3469	5.30609	0				2008-05-05	9.48292	20.4413	8.23972	12.7506				2008-05-05	26.2754	28.1146	15.8382	0
2008-05-06	26.579	21.8375	9.21579	0				2008-05-06	3.99464	9.78998	4.88129	5.32504				2008-05-06	25.2011	29.4324	16.5273	0.496164
2008-05-07	25.9068	19.3465	9.79334	0				2008-05-07	26.6835	20.1109	9.31305	0				2008-05-07	16.1555	26.2411	14.4027	1.25046
2008-05-08	25.9331	22.5597	11.4546	0				2008-05-08	24.2344	22.5155	5.46631	0.255603				2008-05-08	18.6057	22.5778	14.6188	0.245326
2008-05-09	10.448	21.4542	14.1188	0				2008-05-09	28.9814	11.5033	3.85089	0				2008-05-09	24.9532	25.0617	15.0305	0.0523816
2008-05-10	29.0549	23.9836	13.4804	0				2008-05-10	28.3108	17.7007	8.21039	0				2008-05-10	18.6833	25.7258	15.9156	1.10285
2008-05-11	25.4337	30.2028	14.4686	0.0884052				2008-05-11	26.9893	24.134	9.69479	0				2008-05-11	4.82583	14.0046	5.47055	2.18789
2008-05-12	9.89437	17.3314	11.4923	0.621845				2008-05-12	26.2086	25.9408	12.1673	0.10427				2008-05-12	27.032	21.07	9.45725	0
2008-05-13	23.7071	21.8241	11.3349	0.0927223				2008-05-13	20.8283	24.954	14.8514	0				2008-05-13	26.8793	22.4932	12.1154	0
2008-05-14	23.1572	23.7791	13.0573	0				2008-05-14	24.276	23.7811	10.7159	0.0707814				2008-05-14	22.3587	23.4854	13.9431	0
2008-05-15	23.2459	24.1606	13.5714	0				2008-05-15	19.5012	23.5817	12.9622	0				2008-05-15	27.0916	23.8265	12.1176	0
2008-05-16	28.4439	30.1642	15.0826	0				2008-05-16	29.4987	22.0469	12.4379	0				2008-05-16	27.0867	27.8761	16.2809	0.919735
2008-05-17	26.7177	28.9503	16.9423	0				2008-05-17	26.9886	23.6576	13.3581	0.0589816				2008-05-17	26.9652	27.7664	16.6608	0
2008-05-18	25.5398	25.3128	15.7579	0.277998				2008-05-18	10.3906	21.349	13.5421	0.252719				2008-05-18	26.4013	26.993	14.9761	0
2008-05-19	13.4016	19.4608	12.6887	5.16733				2008-05-19	25.9799	27.9276	15.7722	0				2008-05-19	25.4636	27.3866	14.6706	0
2008-05-20	14.567	14.4086	8.77399	1.86889				2008-05-20	10.9728	21.076	10.9746	0.48182				2008-05-20	22.1137	26.7876	15.2662	0
2008-05-21	28.0385	24.7455	9.38107	0				2008-05-21	26.0067	24.8777	12.2876	1.20538				2008-05-21	27.2278	31.3696	19.1438	0
2008-05-22	17.9754	21.8412	12.0922	0.0103752				2008-05-22	13.9785	17.5102	10.6231	0.420171				2008-05-22	21.7036	27.4828	15.5991	0
2008-05-23	28.1205	22.3539	10.8142	0				2008-05-23	18.6113	19.9784	9.72534	0.130131				2008-05-23	22.3021	27.386	17.0755	0
2008-05-24	31.0025	25.0717	13.3786	0				2008-05-24	19.0899	17.5394	9.49167	0.0939833				2008-05-24	26.0711	27.3164	17.8858	0
2008-05-25	28.5551	27.2815	14.765	0				2008-05-25	26.7132	18.8871	8.34695	0.219499				2008-05-25	27.1446	29.9061	19.339	0
2008-05-26	27.3685	29.8651	17.1811	0				2008-05-26	30.1612	23.4094	12.8889	0				2008-05-26	26.1572	30.9342	21.1537	0.0330518
2008-05-27	26.3893	30.9108	17.8358	0				2008-05-27	22.8676	24.6731	12.1901	0.181733				2008-05-27	24.1673	34.263	19.3697	0
2008-05-28	17.9155	26.7915	17.7428	0.756848				2008-05-28	20.6594	24.2488	13.1718	0.003626				2008-05-28	27.5949	27.1079	13.5053	0
2008-05-29	25.8246	29.9741	18.1139	0.259083				2008-05-29	18.4895	23.5666	14.3302	0.191866				2008-05-29	26.65	23.3743	12.8695	0
2008-05-30	13.7124	21.6242	12.1732	2.03832				2008-05-30	11.8496	21.4766	12.1275	2.42324				2008-05-30	29.1771	24.5773	11.7142	0
2008-05-31	26.0873	21.8145	12.1912	0				2008-05-31	20.3968	23.8789	14.6397	0.389898				2008-05-31	29.0684	26.4626	13.7775	0
2008-06-01	23.9543	25.41	14.5484	0				2008-06-01	24.7478	26.2312	14.5471	0.362315				2008-06-01	27.5753	27.2918	17.2204	0
2008-06-02	22.2151	27.3965	17.8388	0.501858				2008-06-02	12.9648	19.8191	12.1001	1.28059				2008-06-02	28.6381	32.8133	19.4551	0
2008-06-03	10.1549	20.3123	14.4175	9.5542				2008-06-03	28.4866	22.8421	11.7015	0				2008-06-03	28.5269	35.2463	20.523	0.342745
2008-06-04	22.384	23.8314	14.0153	0.127616				2008-06-04	26.1524	24.1028	14.1225	0.407793				2008-06-04	27.4359	37.064	22.4395	0
2008-06-05	22.2937	24.554	13.218	0.0116811				2008-06-05	26.3226	21.323	11.2694	0				2008-06-05	12.0624	29.6165	20.5808	1.28908
2008-06-06	28.5242	22.8373	13.1726	0.0581388				2008-06-06	28.3249	24.7004	14.1306	0				2008-06-06	26.1303	32.2605	20.4375	0.293656
2008-06-07	28.4733	23.2233	13.8238	0				2008-06-07	10.9295	21.5291	11.6308	0				2008-06-07	25.5612	36.9935	21.6769	0
2008-06-08	29.2631	23.8579	14.314	0				2008-06-08	25.1126	24.1543	14.3374	0.12833				2008-06-08	14.8362	26.7519	18.2068	0.316217
2008-06-09	26.7054	27.1925	15.3401	0				2008-06-09	25.644	27.0502	15.4721	0.0487452				2008-06-09	16.4889	24.9746	15.7167	0.746599
2008-06-10	26.2948	27.602	17.9337	0				2008-06-10	26.6954	28.7497	17.0547	0.127355				2008-06-10	27.2718	27.9418	18.2367	0
2008-06-11	27.7414	23.3837	14.8461	0				2008-06-11	21.5778	26.2796	15.6393	1.0457				2008-06-11	23.5032	27.8805	18.4272	1.5936
2008-06-12	28.6067	25.9062	15.4231	0				2008-06-12	23.0905	29.1775	17.4466	0				2008-06-12	25.3362	30.2163	20.435	0.132358
2008-06-13	20.3456	24.556	16.0384	0.0403417				2008-06-13	15.3266	25.5724	17.4706	0				2008-06-13	9.09527	23.9336	15.0984	8.04767
2008-06-14	25.0043	28.0489	16.5306	0				2008-06-14	27.4099	29.2042	18.5597	0				2008-06-14	27.4772	20.5606	14.0226	0
2008-06-15	27.4719	31.5649	17.7519	0				2008-06-15	27.0644	30.2172	18.0493	0				2008-06-15	27.5386	24.1143	15.7961	0
2008-06-16	29.039	32.2451	19.4186	0				2008-06-16	21.4539	27.6342	18.145	0.0692751				2008-06-16	27.8606	30.3896	18.0121	0
2008-06-17	28.8218	33.8109	22.1004	0				2008-06-17	22.274	28.3063	18.8544	0				2008-06-17	27.6548	29.6606	16.7529	0
2008-06-18	23.5845	32.77	21.5692	0				2008-06-18	11.467	24.5789	17.8434	6.36499				2008-06-18	27.7376	30.8268	19.4432	0
2008-06-19	10.504	22.2634	14.4961	4.81159				2008-06-19	15.3109	23.3037	17.576	1.74333				2008-06-19	21.9506	32.1862	21.1543	0.10266
2008-06-20	25.6335	26.7484	15.4687	0				2008-06-20	18.7632	28.3215	16.4099	0.453336				2008-06-20	22.6588	33.467	20.3345	0.104653
2008-06-21	24.1839	28.8998	20.6686	0				2008-06-21	28.9801	31.9452	18.8417	0.0885249				2008-06-21	17.4191	31.3222	19.1241	0
2008-06-22	16.4239	27.8956	18.5164	2.57507				2008-06-22	18.9723	27.809	17.4985	0.413949				2008-06-22	25.7903	31.4787	19.6128	0.353278
2008-06-23	6.03896	18.915	14.4832	0.585285				2008-06-23	17.6196	25.4986	17.2316	0.0449446				2008-06-23	28.5247	34.062	20.8891	0.0316602
2008-06-24	20.6063	23.792	15.8287	0				2008-06-24	21.8449	27.3092	16.8396	0				2008-06-24	24.0349	32.3519	19.3235	0.0265655
2008-06-25	22.5501	21.0358	14.3084	0.00791214				2008-06-25	27.7107	29.1563	19.2468	0				2008-06-25	21.8118	29.1299	17.8578	0
2008-06-26	27.723	25.4999	15.5234	0				2008-06-26	21.8231	28.0582	18.6363	0				2008-06-26	25.9844	31.8733	15.1628	0
2008-06-27	24.4287	25.4076	16.9589	0				2008-06-27	19.5932	27.4912	19.0309	0				2008-06-27	27.1659	34.6416	22.0044	0
2008-06-28	27.2626	29.82	18.7232	0				2008-06-28	16.6131	27.3245	19.3647	0.208805				2008-06-28	28.1109	36.1038	23.0689	0
2008-06-29	28.4851	31.2279	19.2752	0				2008-06-29	21.1671	28.8539	19.6294	0.142994				2008-06-29	25.8759	37.0313	24.8391	0
2008-06-30	29.3005	32.5873	19.8495	0				2008-06-30	27.1341	31.9339	19.2889	0.056404				2008-06-30	27.9321	38.3372	24.0804	0
2008-07-01	29.0781	33.8295	21.1314	0				2008-07-01	26.8512	31.3192	19.9524	0				2008-07-01	28.2785	36.5978	23.2725	0
2008-07-02	27.2679	33.271	21.0143	0				2008-07-02	18.0117	26.3244	16.9802	7.52626				2008-07-02	24.7364	31.5735	22.1865	0
2008-07-03	23.64	32.3406	21.3319	0				2008-07-03	22.7482	26.5417	17.9843	0.295376				2008-07-03	19.2594	29.6994	20.0384	0
2008-07-04	17.3458	30.3084	22.2295	0.488031				2008-07-04	16.2335	28.2737	18.632	0				2008-07-04	25.8402	31.6327	21.561	0
2008-07-05	10.2296	22.3347	19.5146	0.140672				2008-07-05	25.7878	32.0042	20.0276	0				2008-07-05	27.1406	34.5722	23.9341	0
2008-07-06	21.5666	25.7635	18.6364	0.402763				2008-07-06	19.295	29.9875	18.8559	0				2008-07-06	21.1034	32.4185	22.9838	6.06599
2008-07-07	21.5552	30.0024	20.8819	3.31816				2008-07-07	29.2565	31.4502	19.4845	0				2008-07-07	9.20287	24.9542	19.4718	16.4626
2008-07-08	23.3339	30.141	18.1124	0.232685				2008-07-08	26.0316	29.6436	18.5467	0				2008-07-08	10.2417	24.4167	18.8336	4.49489
2008-07-09	26.9227	28.8986	18.7594	0				2008-07-09	27.0694	29.0051	18.474	0				2008-07-09	9.09799	20.5439	15.2216	0.0181526
2008-07-10	28.2871	31.2687	20.0502	0				2008-07-10	27.8175	29.0357	19.0841	0				2008-07-10	28.7883	27.6947	18.6465	0.0567692
2008-07-11	19.8494	32.3817	20.1997	2.59855				2008-07-11	19.8023	30.9769	19.5496	0				2008-07-11	27.7239	26.5919	17.2746	0
2008-07-12	11.4964	23.4822	19.1913	9.48351				2008-07-12	21.4257	30.9	21.7072	0				2008-07-12	27.0188	28.9464	20.7294	0
2008-07-13	22.8792	28.7186	19.2453	0.323997				2008-07-13	22.0477	29.1334	19.6917	1.02887				2008-07-13	27.9246	32.1032	19.8269	0
2008-07-14	26.9694	33.2713	20.4731	0				2008-07-14	25.0393	28.2628	19.9019	0.352186				2008-07-14	26.7358	29.3078	19.2151	0
2008-07-15	26.5726	32.3075	22.5506	0.00273716				2008-07-15	24.9139	30.0059	20.9793	0.0443703				2008-07-15	27.2372	29.7143	18.6065	0
2008-07-16	26.0616	30.7901	24.4428	0				2008-07-16	24.6348	32.0537	21.3715	0				2008-07-16	27.1928	30.9344	18.4709	0
2008-07-17	21.1319	27.9212	19.2386	3.4104				2008-07-17	14.925	29.4144	21.1054	0.274994				2008-07-17	28.2586	32.5062	19.3351	0
2008-07-18	26.2698	28.9059	18.9903	0.189433				2008-07-18	19.3501	28.9676	19.6778	5.54336				2008-07-18	27.4931	33.2672	22.0695	0
2008-07-19	27.223	30.686	21.3109	0				2008-07-19	5.55804	23.8331	17.3803	4.05756				2008-07-19	27.8806	34.1975	20.2477	0
2008-07-20	22.7077	31.3742	22.221	0.0932012				2008-07-20	28.1603	30.808	19.4314	0				2008-07-20	28.4955	37.7548	24.9268	0
2008-07-21	19.3607	30.2387	19.6292	0.352069				2008-07-21	18.598	29.8993	18.1361	0				2008-07-21	28.1331	39.1363	26.1943	0
2008-07-22	22.026	31.2855	21.5001	0.109904				2008-07-22	25.8859	31.4018	20.345	0				2008-07-22	24.0275	38.3	24.3653	0
2008-07-23	11.6996	26.5596	20.4424	0.548884				2008-07-23	22.6872	31.3377	20.4622	0				2008-07-23	26.3925	38.248	25.8875	0
2008-07-24	24.513	29.0684	18.4766	1.03873				2008-07-24	15.8248	28.9089	20.8842	0				2008-07-24	23.7492	35.4265	25.9701	0
2008-07-25	27.9555	30.4514	19.2277	0.123147				2008-07-25	26.2998	33.2478	20.9451	0.0508761				2008-07-25	17.9989	32.9964	25.1854	0.147979
2008-07-26	27.6242	32.7696	19.5916	0				2008-07-26	22.2591	34.6544	21.7153	0				2008-07-26	25.4466	34.4443	21.526	0
2008-07-27	25.8027	31.0734	19.3183	0.248202				2008-07-27	19.2576	33.9881	19.6504	0.127609				2008-07-27	26.5531	33.4563	20.6827	0
2008-07-28	25.8308	31.178	19.6795	0				2008-07-28	24.3606	33.5416	18.861	0.712524				2008-07-28	27.2918	36.1267	22.5808	0
2008-07-29	26.7183	31.7769	21.9628	0				2008-07-29	16.5014	22.9027	15.4938	2.00537				2008-07-29	27.9974	37.4773	24.5316	0
2008-07-30	17.2341	30.3774	24.0799	0.999639				2008-07-30	25.147	23.3846	12.2635	0				2008-07-30	27.9786	38.9767	24.1792	0
2008-07-31	5.63023	24.1013	20.0463	4.97529				2008-07-31	28.4379	24.1015	12.5243	0				2008-07-31	27.9762	37.8699	23.4456	0
2008-08-01	17.4902	26.6749	19.5866	1.66171				2008-08-01	27.7655	28.6201	17.4369	0				2008-08-01	26.6852	38.6289	24.6753	0
2008-08-02	18.663	26.8927	19.207	1.48929				2008-08-02	27.0409	30.5816	19.6185	0				2008-08-02	25.809	39.2489	26.2447	0
2008-08-03	19.9947	27.3222	20.7601	0.421877				2008-08-03	14.7898	29.4667	21.4407	0				2008-08-03	18.3719	33.881	24.3369	0.200182
2008-08-04	24.7426	28.4959	20.8334	0.149506				2008-08-04	22.0243	30.889	21.538	0.193686				2008-08-04	23.7866	34.6716	23.8709	3.70196
2008-08-05	25.1657	29.3523	20.8759	0				2008-08-05	15.212	30.993	20.5278	0.245824				2008-08-05	10.4371	24.1883	17.9561	0.430834
2008-08-06	24.496	29.7783	21.5601	0				2008-08-06	16.3822	30.0841	19.1096	0.0812064				2008-08-06	14.0051	19.5484	15.5321	4.09032
2008-08-07	16.1391	28.5811	23.2896	0.161497				2008-08-07	21.8312	30.8604	19.4453	0				2008-08-07	9.94592	17.3183	13.6667	4.21648
2008-08-08	8.22253	23.4902	17.3125	1.51456				2008-08-08	16.2388	26.6094	18.5789	0.0643539				2008-08-08	25.4589	25.7272	17.0508	0
2008-08-09	7.69691	19.0486	14.0712	6.77603				2008-08-09	19.9197	26.8927	17.4844	1.14496				2008-08-09	27.2365	29.3844	18.1256	0
2008-08-10	19.693	22.704	14.2107	2.36059				2008-08-10	15.9117	24.4517	15.8346	3.67245				2008-08-10	26.2958	31.3996	18.968	0
2008-08-11	22.1379	28.3002	15.1289	0.751334				2008-08-11	7.51658	21.5523	14.3913	6.73642				2008-08-11	24.8232	30.8751	18.7766	0.00300924
2008-08-12	12.3387	25.3813	19.7438	2.21482				2008-08-12	17.6723	19.5161	14.3826	3.1876				2008-08-12	26.467	32.7667	20.2143	0
2008-08-13	18.3469	28.8474	21.4352	0.0592468				2008-08-13	18.8039	23.2636	17.9082	2.39938				2008-08-13	26.1839	35.0491	22.172	0
2008-08-14	18.6602	31.0367	21.7785	1.26814				2008-08-14	18.4646	26.2862	18.7414	1.25974				2008-08-14	22.1884	35.0931	20.9231	2.19121
2008-08-15	19.4855	31.1101	22.0142	0.922046				2008-08-15	20.7826	27.4353	20.0557	0.629819				2008-08-15	6.90542	23.0182	16.5676	2.43461
2008-08-16	10.7993	22.0848	18.576	3.9762				2008-08-16	22.0899	28.2196	19.676	2.48451				2008-08-16	23.584	29.4645	18.4753	0
2008-08-17	24.3925	27.834	18.7248	0.253754				2008-08-17	23.009	29.4015	17.6782	0.232967				2008-08-17	24.0902	31.2314	20.6687	0
2008-08-18	22.867	29.5635	19.4817	0.818723				2008-08-18	19.7288	28.2805	18.6206	1.06337				2008-08-18	23.7584	34.5813	21.5867	0
2008-08-19	22.4537	28.361	20.3678	2.56904				2008-08-19	11.4131	26.3412	18.5981	2.58375				2008-08-19	17.8315	33.0965	21.1115	0
2008-08-20	17.1441	25.5142	19.9067	0.879655				2008-08-20	13.9492	26.1744	17.82	0.697053				2008-08-20	19.1475	29.5961	19.9115	0
2008-08-21	17.0123	25.0307	18.6303	8.15369				2008-08-21	20.7181	27.2004	18.4137	0.631264				2008-08-21	15.2176	28.5257	19.8977	0
2008-08-22	24.1588	23.9085	16.5842	0				2008-08-22	11.8046	24.2541	15.2261	0.0447881				2008-08-22	13.2272	29.4876	18.2426	0.365849
2008-08-23	22.7783	25.1302	16.0138	0.0954391				2008-08-23	18.0108	25.7507	15.4638	0				2008-08-23	20.0182	29.4386	18.3026	0.85824
2008-08-24	20.5703	24.8044	16.7461	3.65787				2008-08-24	22.8709	27.7453	15.3862	0.173871				2008-08-24	18.6148	29.9385	19.372	0.296523
2008-08-25	8.68446	20.8805	16.9898	5.76098				2008-08-25	22.4707	25.288	16.0737	0				2008-08-25	15.1138	27.7111	18.3492	0.426653
2008-08-26	14.7608	22.8251	15.8009	0.124018				2008-08-26	19.6227	26.1084	16.7096	0.153077				2008-08-26	23.7258	31.6805	17.8005	0
2008-08-27	11.9932	21.7383	15.9882	0				2008-08-27	22.7913	29.2479	18.1604	0.263463				2008-08-27	23.486	31.1792	15.6096	1.04089
2008-08-28	19.2825	24.9617	15.9845	2.1088				2008-08-28	8.54467	22.7352	15.8654	10.5871				2008-08-28	18.7988	22.1382	11.8926	0
2008-08-29	23.9992	27.1345	16.8633	0				2008-08-29	21.2224	27.7975	16.4684	0				2008-08-29	23.9067	26.2215	14.9912	0
2008-08-30	21.7859	28.172	17.5103	0				2008-08-30	14.9203	27.2457	16.5464	0.202557				2008-08-30	21.0874	28.9084	17.6123	0
2008-08-31	21.4093	26.9917	17.3598	0				2008-08-31	19.5414	27.8143	16.3383	0				2008-08-31	17.2241	27.2034	17.6056	0.138204
2008-09-01	20.4126	26.2324	17.7886	0.0122552				2008-09-01	15.807	25.1739	12.9685	0				2008-09-01	16.7949	27.2582	18.4263	0.053198
2008-09-02	19.03	23.7468	15.0514	0				2008-09-02	18.8261	23.5572	15.9609	0				2008-09-02	19.0136	26.3204	15.6485	0
2008-09-03	20.42	24.0054	15.6511	0				2008-09-03	16.0281	24.7756	14.0582	0				2008-09-03	21.4816	29.1523	16.6999	0
2008-09-04	21.2313	26.2887	16.374	0				2008-09-04	21.8033	27.941	12.405	0.167302				2008-09-04	21.8938	30.6355	15.8373	0
2008-09-05	18.1035	26.863	17.5272	0				2008-09-05	19.806	26.5404	14.6447	0				2008-09-05	23.5106	28.1805	14.4274	0
2008-09-06	13.5347	25.9267	16.4311	4.73313				2008-09-06	16.1771	24.4654	15.3518	0				2008-09-06	20.252	29.7148	13.9636	0.0151346
2008-09-07	3.7342	15.4051	9.47058	5.21957				2008-09-07	19.4328	22.7715	13.468	0.460446				2008-09-07	22.5658	31.4745	14.3429	0
2008-09-08	7.69353	18.2678	10.9441	0.325092				2008-09-08	20.9305	23.606	14.0807	0.0474102				2008-09-08	23.8446	34.4144	13.1934	0
2008-09-09	22.2204	23.5156	12.4076	0				2008-09-09	20.9891	25.8827	16.0029	0				2008-09-09	22.422	34.123	16.4951	0
2008-09-10	18.5191	23.4597	12.6966	0				2008-09-10	19.9096	29.5984	17.9954	0.0344057				2008-09-10	21.7812	32.9381	17.2942	0
2008-09-11	21.0748	23.1685	13.0582	0				2008-09-11	12.5991	22.9487	11.9711	0.0408455				2008-09-11	22.8191	33.2763	17.4852	0
2008-09-12	20.0561	24.9208	13.7164	0				2008-09-12	14.691	22.8557	12.9332	0				2008-09-12	21.5794	36.6004	16.3102	0
2008-09-13	14.2254	22.3788	15.047	0				2008-09-13	19.1256	25.4901	11.9899	0.0214417				2008-09-13	20.2983	31.7685	17.1693	0
2008-09-14	18.0006	25.1472	15.1102	0.372211				2008-09-14	20.0383	24.8969	13.7597	0				2008-09-14	19.4248	31.137	13.5067	0
2008-09-15	12.5462	19.3989	12.9141	0.141319				2008-09-15	18.8679	29.2974	15.5708	0.0692685				2008-09-15	20.3385	22.2505	10.5334	0
2008-09-16	7.8955	17.035	11.2078	0.991531				2008-09-16	5.57894	22.5269	13.0734	18.3821				2008-09-16	17.7329	25.0497	14.5105	0
2008-09-17	9.00291	19.1787	9.85586	0.193433				2008-09-17	9.83573	20.183	7.46997	1.14418				2008-09-17	19.0278	26.3952	15.0066	1.22924
2008-09-18	10.5811	18.2244	10.1225	0.209477				2008-09-18	13.5423	22.7876	13.0345	0.0217245				2008-09-18	14.4266	22.6793	13.3402	4.93186
2008-09-19	19.9962	22.4218	10.1879	0				2008-09-19	14.6348	20.3477	8.54791	0.0081951				2008-09-19	19.3809	24.957	14.2368	0.577879
2008-09-20	17.8505	23.1715	11.9185	0				2008-09-20	20.2988	12.8468	4.6944	0				2008-09-20	19.509	26.0868	13.5323	2.50976
2008-09-21	19.5025	22.7789	11.9245	0				2008-09-21	20.604	19.7255	7.38498	0				2008-09-21	20.3153	23.0347	12.2127	0.00447175
2008-09-22	18.6488	24.7413	13.5478	0				2008-09-22	17.4302	22.3041	9.4137	0				2008-09-22	6.31874	15.2839	7.79465	12.4772
2008-09-23	5.76957	19.1932	11.3384	0.44261				2008-09-23	18.1993	24.929	11.9168	0				2008-09-23	19.7755	18.3871	5.42111	0
2008-09-24	10.3456	19.7322	9.26199	0.254271				2008-09-24	9.64965	20.7824	8.96887	0.133767				2008-09-24	20.253	19.9936	8.94135	0
2008-09-25	16.5716	22.9135	9.61823	0.48205				2008-09-25	14.8603	21.3595	9.9162	0.246493				2008-09-25	13.5423	20.3004	9.89365	1.95578
2008-09-26	17.2785	19.9447	10.8266	0				2008-09-26	15.8963	24.3177	9.00391	0				2008-09-26	5.21037	17.1516	9.43924	0.925835
2008-09-27	17.5331	23.0853	11.2666	0				2008-09-27	19.0343	22.6869	11.4515	0				2008-09-27	13.6693	25.4588	10.2724	7.63712
2008-09-28	17.6833	22.8619	11.7711	0				2008-09-28	13.1427	26.9126	13.7745	0				2008-09-28	18.8995	12.7804	4.0538	0
2008-09-29	8.45876	16.7936	9.22174	1.10993				2008-09-29	3.03071	13.1887	7.49561	1.1377				2008-09-29	18.3722	17.3837	5.05182	0.0462171
2008-09-30	17.2111	17.3254	7.86703	0				2008-09-30	7.78836	15.0602	4.94528	0.215168				2008-09-30	17.8143	21.4475	6.2453	0
2008-10-01	18.5397	20.2834	7.50012	0				2008-10-01	17.7143	20.7393	5.72498	0				2008-10-01	18.3885	15.484	2.04404	0
2008-10-02	18.3451	20.726	7.07785	0.0170081				2008-10-02	17.5273	20.5561	7.48633	0				2008-10-02	18.6309	16.8583	4.16556	0
2008-10-03	18.6805	25.2333	7.6954	0				2008-10-03	15.4039	17.5167	4.5741	0				2008-10-03	18.1229	19.0446	5.99225	0
2008-10-04	18.3299	25.7677	10.5675	0				2008-10-04	8.96173	14.1638	4.43985	7.88971				2008-10-04	13.6772	17.097	6.72199	0.0106763
2008-10-05	17.4591	27.0429	11.8144	0				2008-10-05	7.50422	11.1162	1.54468	0.577827				2008-10-05	16.272	20.96	8.46686	0
2008-10-06	15.9174	26.9599	10.9215	0.00384832				2008-10-06	16.873	17.6044	2.42267	0				2008-10-06	15.7479	23.1302	10.0984	0.0272656
2008-10-07	11.7929	17.4068	6.32181	0.198052				2008-10-07	16.691	22.1487	4.91202	0				2008-10-07	13.9942	22.3811	7.04608	0.144147
2008-10-08	17.4159	22.0637	5.81537	0				2008-10-08	16.8564	24.6879	8.7991	0				2008-10-08	16.8464	20.7503	6.41476	0
2008-10-09	16.5721	25.5814	11.9001	0				2008-10-09	16.2099	26.5631	13.7192	0				2008-10-09	13.1059	18.9975	8.45468	11.1625
2008-10-10	12.925	26.0292	5.07843	4.4436				2008-10-10	11.2645	24.2083	11.3668	4.91102				2008-10-10	3.00394	15.0524	7.73022	4.15045
2008-10-11	10.8531	6.4473	2.37231	0.134181				2008-10-11	6.73086	16.7257	7.06635	4.97449				2008-10-11	4.20666	16.4031	7.61688	10.6278
2008-10-12	11.538	9.66031	3.00241	0.0670112				2008-10-12	12.8444	8.89975	1.06485	0.370572				2008-10-12	8.04496	17.0785	5.91934	0.30479
2008-10-13	12.5167	12.8715	4.91293	0.24625				2008-10-13	16.5445	9.95602	0.350006	0				2008-10-13	15.615	21.5885	8.53549	0
2008-10-14	12.7344	13.3264	1.52097	0				2008-10-14	15.1898	16.4841	3.37952	0				2008-10-14	13.5874	19.4579	6.61987	1.64422
2008-10-15	3.20095	7.07489	0.306366	2.88186				2008-10-15	15.0142	21.4463	8.63577	0				2008-10-15	13.2406	14.9022	0.643189	0
2008-10-16	8.9854	6.47064	-0.135254	0.17412				2008-10-16	12.0263	13.2106	4.0809	0.242307				2008-10-16	16.0379	14.5915	3.50485	0
2008-10-17	14.3482	12.782	-0.762177	0.107979				2008-10-17	15.4324	17.8886	4.26047	0				2008-10-17	13.5077	18.414	4.20206	0
2008-10-18	6.09161	8.80923	1.89123	0.0720586				2008-10-18	14.6356	17.989	4.20743	0				2008-10-18	8.90458	14.7652	2.23026	0.331252
2008-10-19	7.99238	11.07	2.57773	0.0428764				2008-10-19	15.2129	19.0195	4.41501	0				2008-10-19	15.2794	12.207	1.14203	0
2008-10-20	5.56203	8.66061	5.06149	0.358434				2008-10-20	14.6976	21.3136	5.04291	0				2008-10-20	11.9522	17.5904	3.89478	0
2008-10-21	8.85474	11.4157	5.02838	0.29345				2008-10-21	14.8707	22.6536	5.35141	0				2008-10-21	13.311	17.3076	1.14041	0.810099
2008-10-22	8.51123	12.2483	5.80145	0.253796				2008-10-22	14.2939	22.0799	5.67169	0.518437				2008-10-22	8.58575	1.88315	-5.68692	0.656151
2008-10-23	11.1432	13.2107	4.79886	0.0554148				2008-10-23	8.98976	14.9696	3.50638	0.293525				2008-10-23	12.9669	2.87073	-7.7533	0
2008-10-24	8.9893	11.3773	4.4411	0.2721				2008-10-24	12.5599	14.2478	1.2897	0.0477476				2008-10-24	13.6809	5.16293	-5.69961	0
2008-10-25	7.20507	9.45023	5.81039	2.12332				2008-10-25	9.85815	15.7932	4.67188	10.5948				2008-10-25	14.3458	9.08041	-4.04785	0.091573
2008-10-26	8.24541	9.70013	3.61652	0.0978535				2008-10-26	11.4862	17.8271	5.72659	0.277809				2008-10-26	14.16	15.208	-3.17139	0
2008-10-27	13.3325	13.5379	1.46405	0				2008-10-27	5.3042	14.4479	3.92291	0.215672				2008-10-27	13.4741	15.4243	-0.382812	0
2008-10-28	11.6139	14.1619	2.49258	0.207382				2008-10-28	12.7364	13.7141	1.14948	0.0709049				2008-10-28	12.5327	15.6349	-0.524567	0
2008-10-29	5.28657	10.5277	3.26215	2.55714				2008-10-29	12.5803	16.6131	4.37967	0				2008-10-29	13.543	18.2321	1.71991	0.0217803
2008-10-30	14.1031	7.53046	-1.56711	0				2008-10-30	12.9394	18.5351	3.90396	0				2008-10-30	13.473	10.7171	-0.165924	0
2008-10-31	14.5823	7.56372	-2.87735	0				2008-10-31	10.568	16.0603	4.98068	0				2008-10-31	13.1921	13.3012	-0.593658	0
2008-11-01	13.2069	8.93655	-3.11926	0				2008-11-01	11.1527	16.5474	2.57892	0				2008-11-01	13.042	15.1724	2.06921	0
2008-11-02	12.9067	14.5555	-1.56015	0				2008-11-02	11.9913	15.1085	1.25513	0.0127013				2008-11-02	12.8878	16.9984	2.27145	0
2008-11-03	11.7684	17.2098	1.85458	0.106083				2008-11-03	9.92327	11.8608	-1.92416	0.220095				2008-11-03	9.75179	16.0016	1.49881	0.0528296
2008-11-04	5.71721	8.75388	-0.108246	1.86424				2008-11-04	11.508	7.52383	-2.92294	0				2008-11-04	11.1136	13.7558	0.420227	0.031322
2008-11-05	12.311	12.6383	-1.49323	0				2008-11-05	9.71994	7.10263	-5.90597	0				2008-11-05	5.29334	13.016	1.74661	1.03073
2008-11-06	11.1836	11.0459	-1.05667	0				2008-11-06	11.4283	10.4433	-0.789093	0.420397				2008-11-06	0.138902	9.72397	2.91751	9.61499
2008-11-07	10.6501	5.04544	-2.57468	0				2008-11-07	5.04757	6.25839	-1.17447	1.86982				2008-11-07	6.84258	10.6294	0.705048	0.0500738
2008-11-08	10.8935	9.18649	-2.80875	0				2008-11-08	3.15892	4.7388	-3.9357	0.745141				2008-11-08	11.6753	11.6635	0.85144	0
2008-11-09	10.8381	14.0851	-0.116608	0.0184724				2008-11-09	11.6759	8.62329	-3.10507	0				2008-11-09	11.7425	8.71915	-1.90762	0
2008-11-10	9.6479	14.2945	3.09949	0.0229248				2008-11-10	6.79256	9.48257	0.248657	0				2008-11-10	12.1141	8.27472	-1.98663	0
2008-11-11	8.77181	11.8357	-1.42712	0				2008-11-11	10.7947	11.7243	0.838104	0				2008-11-11	10.7988	11.0668	-2.26813	0
2008-11-12	10.7301	15.2171	-1.23398	0				2008-11-12	3.80155	4.15671	-5.97348	0.180027				2008-11-12	5.6283	9.43073	-0.973389	0
2008-11-13	9.47195	13.5922	0.285461	0				2008-11-13	11.0685	4.22494	-7.4632	0				2008-11-13	1.66694	6.7735	-0.553162	0.144899
2008-11-14	5.30332	5.26874	-0.214203	0.206878				2008-11-14	10.6735	5.68915	-5.08258	0				2008-11-14	10.7725	7.30432	-1.5719	0
2008-11-15	1.02099	2.44196	-2.30829	0.178069				2008-11-15	10.2218	3.57718	-4.74322	0				2008-11-15	9.33971	10.7273	-0.360504	0
2008-11-16	10.471	5.14154	-2.32834	0				2008-11-16	7.41235	6.28302	-3.08383	0				2008-11-16	10.3755	3.09897	-4.56161	0
2008-11-17	6.85641	5.81241	-1.60132	0.0255748				2008-11-17	8.57726	6.90259	-2.17584	0				2008-11-17	10.5663	2.03885	-5.51657	0
2008-11-18	4.88991	6.75229	-0.114258	0				2008-11-18	10.9864	4.2319	-3.63535	0				2008-11-18	10.388	8.13486	-2.82224	0.0122772
2008-11-19	10.0641	10.6038	-1.24429	0				2008-11-19	10.4298	3.74289	-5.48755	0				2008-11-19	10.3872	1.56085	-5.22201	0
2008-11-20	9.54955	9.69693	-0.398682	0				2008-11-20	9.04602	6.91434	-5.09256	0.0374956				2008-11-20	10.3569	3.28647	-4.92419	0
2008-11-21	9.77563	8.9285	-0.129059	0				2008-11-21	2.59676	4.82617	-3.78384	0.44608				2008-11-21	10.0784	6.87466	-3.40271	0
2008-11-22	9.20899	10.1908	-0.105286	0				2008-11-22	4.85678	2.67087	-4.85809	0.105053				2008-11-22	9.46071	8.19287	-1.72003	0
2008-11-23	9.31223	10.666	-1.24112	0				2008-11-23	4.96434	0.801636	-7.15103	0.0634219				2008-11-23	9.99029	8.02057	-1.96637	0
2008-11-24	7.66769	6.61722	-2.41684	0.428108				2008-11-24	3.77451	-1.27676	-8.49081	0.0275913				2008-11-24	9.82549	6.72165	-2.68961	0
2008-11-25	8.8515	7.04648	-2.48862	0.00981929				2008-11-25	9.20277	-0.749176	-8.64819	0.00350288				2008-11-25	9.59355	5.65951	-2.68167	0
2008-11-26	7.4832	5.86911	-4.2334	0.0337632				2008-11-26	10.0333	-1.23318	-8.36688	0				2008-11-26	7.5395	5.8241	-2.48554	0.044061
2008-11-27	10.3739	-0.676117	-5.69849	0				2008-11-27	10.1344	-0.98941	-9.59158	0				2008-11-27	5.85285	6.44601	-2.10504	0.0960354
2008-11-28	9.57452	4.26541	-5.67361	0				2008-11-28	9.81173	-0.427795	-8.99802	0				2008-11-28	9.43844	8.80063	-1.98859	0
2008-11-29	9.20157	5.10977	-2.87527	0				2008-11-29	9.37338	-0.0948791	-8.28986	0				2008-11-29	9.30701	10.3518	-0.569855	0
2008-11-30	6.72642	5.21668	-3.28287	0				2008-11-30	9.60113	0.459412	-8.48733	0				2008-11-30	8.94298	13.23	-0.68631	0.0331682
2008-12-01	3.26722	-2.07062	-7.84543	0.097507				2008-12-01	9.24333	4.6272	-6.19199	0				2008-12-01	6.79786	10.8102	2.04477	0
2008-12-02	6.79873	-1.27182	-9.09168	0				2008-12-02	7.90506	7.04593	-2.68601	0				2008-12-02	4.04867	5.14426	-3.31021	0
2008-12-03	3.84538	1.16559	-7.26205	0.292393				2008-12-03	6.94562	6.71289	-3.62524	0				2008-12-03	4.31512	-0.224335	-6.00375	0.287248
2008-12-04	6.91018	1.04132	-13.6446	0				2008-12-04	5.70372	5.07455	-3.23154	0				2008-12-04	5.14285	-1.03485	-8.2623	0
2008-12-05	9.23522	-5.30872	-14.273	0				2008-12-05	4.76141	2.8905	-5.43018	0.232498				2008-12-05	8.91617	-0.905823	-8.7908	0
2008-12-06	8.87682	1.50122	-8.52487	0				2008-12-06	1.14231	-4.04196	-12.6641	0.540055				2008-12-06	8.70726	1.32044	-6.75812	0.0243762
2008-12-07	8.82625	4.91989	-8.17554	0				2008-12-07	8.76969	-6.96298	-14.4435	0				2008-12-07	5.71766	2.21451	-6.15613	0.00754669
2008-12-08	8.07996	1.61151	-8.42621	0				2008-12-08	7.54482	-5.62924	-15.1151	0				2008-12-08	8.29675	4.2363	-4.24615	0
2008-12-09	8.46036	-1.83588	-12.6009	0				2008-12-09	6.17485	-5.32715	-13.4189	0.0385251				2008-12-09	8.16756	1.95953	-7.86127	0.0535032
2008-12-10	9.70373	-2.83701	-12.6762	0				2008-12-10	7.52893	-1.22131	-11.6139	0.224949				2008-12-10	3.99883	-8.91946	-16.2582	0.0158507
2008-12-11	8.6508	0.696899	-12.0414	0				2008-12-11	6.56728	1.72134	-7.95389	0.0551078				2008-12-11	9.12878	-6.32056	-17.1094	0
2008-12-12	8.59398	-1.75595	-11.3384	0				2008-12-12	6.67571	1.99304	-6.18796	0				2008-12-12	8.49667	-0.141388	-11.6533	0
2008-12-13	7.9839	0.0424194	-10.7274	0				2008-12-13	8.44231	0.894623	-8.75677	0				2008-12-13	7.13761	-1.15402	-10.4406	0
2008-12-14	5.21403	-0.300568	-10.5061	0				2008-12-14	8.15443	2.49838	-9.18686	0				2008-12-14	8.0585	-2.54379	-11.528	0
2008-12-15	6.82019	1.90955	-8.61813	0				2008-12-15	7.66949	1.57675	-7.32529	0				2008-12-15	7.59365	-2.3923	-10.4442	0
2008-12-16	7.41681	2.80215	-7.04794	0				2008-12-16	8.03186	2.06232	-9.26334	0				2008-12-16	8.66263	0.642609	-9.35568	0
2008-12-17	8.38479	0.944977	-8.83484	0				2008-12-17	7.4603	-2.85782	-13.4017	0.00753755				2008-12-17	8.63405	-0.961884	-10.7419	0
2008-12-18	8.54085	-1.64969	-10.2784	0				2008-12-18	8.28236	-7.71527	-16.8316	4.00503				2008-12-18	7.68892	-4.13455	-13.4296	0
2008-12-19	6.10841	3.85706	-8.25592	0				2008-12-19	8.56162	-3.21701	-15.4062	0				2008-12-19	8.32181	2.88892	-11.1376	0
2008-12-20	6.39287	6.06036	-4.11508	0				2008-12-20	7.73119	2.18338	-9.99771	0				2008-12-20	6.9292	2.45078	-5.83926	0.00302331
2008-12-21	5.80806	3.40299	-4.74625	0				2008-12-21	8.00932	2.54898	-8.59042	0				2008-12-21	3.82273	-6.09235	-18.1285	0.0141909
2008-12-22	5.70204	3.68912	-6.13229	0				2008-12-22	4.10929	-0.527069	-10.9959	0.12679				2008-12-22	9.1686	-9.27072	-19.1314	0
2008-12-23	5.90699	6.1572	-5.01508	0				2008-12-23	8.61804	-2.6987	-13.3543	0				2008-12-23	8.42585	-4.23117	-16.5003	0
2008-12-24	3.33369	0.675293	-5.7645	0				2008-12-24	8.41814	-2.20456	-13.3647	0				2008-12-24	6.89089	-5.49747	-15.3017	0
2008-12-25	7.43912	2.64084	-6.23679	0				2008-12-25	8.5763	2.19461	-11.1926	0				2008-12-25	6.78221	-3.58044	-13.1949	0
2008-12-26	7.18605	4.6113	-6.43045	0				2008-12-26	7.32723	-1.04996	-11.3436	0				2008-12-26	8.52939	-4.05411	-13.5478	0
2008-12-27	6.47823	4.24277	-5.00974	0				2008-12-27	7.89333	-6.74207	-15.4956	0				2008-12-27	8.88596	-2.10754	-13.3335	0
2008-12-28	7.74596	0.655121	-6.11807	0				2008-12-28	9.00995	-2.91043	-15.072	0				2008-12-28	8.47328	-1.47086	-12.4742	0
2008-12-29	7.68884	1.3851	-7.53909	0				2008-12-29	9.39305	-2.52072	-14.0675	0				2008-12-29	7.59281	-4.21109	-14.5426	0
2008-12-30	9.11265	0.21402	-9.38211	0				2008-12-30	9.26573	0.4841	-12.1481	0				2008-12-30	9.27112	-3.17966	-14.7854	0
2008-12-31	8.50412	4.35538	-8.09784	0				2008-12-31	8.7286	1.32343	-9.8667	0				2008-12-31	9.20158	-1.1785	-12.4275	0
2009-01-01	7.0304	3.94632	-4.56604	0				2009-01-01	5.552	0.454804	-10.042	0				2009-01-01	8.58624	-1.61902	-12.6028	0
2009-01-02	7.33491	2.05856	-5.30957	0				2009-01-02	5.96334	0.442505	-11.1251	0				2009-01-02	9.19954	-0.530273	-12.7741	0
2009-01-03	8.17538	4.71591	-4.06778	0				2009-01-03	7.4375	1.95886	-10.8476	0				2009-01-03	9.17591	2.32919	-9.01788	0
2009-01-04	4.45671	2.96829	-5.41815	0				2009-01-04	8.96669	1.28824	-11.2819	0				2009-01-04	9.02945	-0.0809021	-8.78549	0
2009-01-05	4.55016	-4.16196	-11.68	0.233362				2009-01-05	8.72462	-1.71115	-11.8269	0				2009-01-05	0.954563	-3.60556	-12.5509	0.011856
2009-01-06	4.64362	-6.6705	-14.0301	0.0167535				2009-01-06	8.4668	-0.879547	-12.2671	0				2009-01-06	5.17914	-5.11945	-15.4905	0
2009-01-07	9.67863	-6.87576	-15.7192	0				2009-01-07	1.45997	-2.64032	-11.631	0				2009-01-07	9.29987	-0.392059	-10.8941	0
2009-01-08	7.97355	-7.67175	-16.6791	0				2009-01-08	8.98042	-2.3053	-12.4992	0				2009-01-08	9.29235	0.267395	-10.1051	0
2009-01-09	4.7812	-6.05176	-14.9154	0				2009-01-09	9.0139	-1.1311	-11.7317	0				2009-01-09	5.47866	-2.78388	-12.6029	0
2009-01-10	8.28698	-4.20944	-14.7494	0				2009-01-10	3.77174	-1.97659	-12.1555	0				2009-01-10	9.24455	-1.50503	-12.7792	0
2009-01-11	8.80854	-0.797455	-13.7149	0				2009-01-11	8.82377	-3.02191	-11.9305	0				2009-01-11	8.92164	-2.30936	-12.2149	0
2009-01-12	4.5684	-1.56107	-11.9462	0				2009-01-12	9.4913	-4.02048	-13.231	0				2009-01-12	9.67809	1.02054	-12.0459	0
2009-01-13	8.49008	-2.72842	-11.5495	0				2009-01-13	9.63042	-0.283142	-13.8457	0				2009-01-13	9.7146	-0.573944	-12.9095	0
2009-01-14	7.88719	-3.69785	-12.2233	0.485663				2009-01-14	9.48857	-0.383484	-12.3494	0				2009-01-14	8.4986	-1.75006	-12.1943	0
2009-01-15	6.7397	-7.0509	-16.9688	0.2945				2009-01-15	9.61901	1.15808	-10.056	0				2009-01-15	8.45388	1.81619	-10.7366	0
2009-01-16	9.50069	-9.41367	-18.1203	0				2009-01-16	9.13002	-0.908844	-11.1888	0				2009-01-16	6.33776	1.2898	-9.53613	0
2009-01-17	8.27361	2.6796	-13.1378	0				2009-01-17	9.41052	-1.38855	-12.5881	0				2009-01-17	7.24853	1.82956	-9.73874	0
2009-01-18	5.83698	-7.52786	-17.8615	0.0330249				2009-01-18	9.27989	-2.92679	-11.9283	0				2009-01-18	3.67606	-0.119568	-12.7388	0
2009-01-19	10.9146	-10.1222	-20.0733	0				2009-01-19	10.4058	-0.209564	-12.7669	0				2009-01-19	6.31804	-1.1319	-13.6121	0
2009-01-20	9.96655	-5.72751	-20.2896	0				2009-01-20	5.65607	-1.3775	-12.8045	0				2009-01-20	1.6422	-2.39682	-15.5656	0
2009-01-21	10.2182	-3.02161	-17.1022	0.444236				2009-01-21	8.48143	3.40878	-13.6758	0				2009-01-21	6.92616	-10.2613	-18.1901	0
2009-01-22	5.99584	-8.82461	-18.1904	0				2009-01-22	9.34243	3.93237	-8.84216	0				2009-01-22	10.3906	-9.10266	-19.2157	0
2009-01-23	10.4118	-9.94733	-19.742	0				2009-01-23	8.88895	-12.3325	-22.0059	0				2009-01-23	10.7965	-8.91385	-18.6379	0
2009-01-24	11.408	-6.3143	-18.4756	0				2009-01-24	11.5115	-14.0991	-24.5413	0				2009-01-24	11.2437	-3.88504	-19.1249	0
2009-01-25	11.1428	-4.07138	-16.9746	0				2009-01-25	10.0691	-9.85916	-22.6212	0				2009-01-25	10.7799	2.1221	-10.8324	0
2009-01-26	11.4839	-4.26321	-17.0031	0				2009-01-26	11.4462	-1.43588	-16.5259	0				2009-01-26	11.0099	1.66281	-12.0234	0
2009-01-27	11.6774	-1.67477	-16.6287	0				2009-01-27	7.55161	-0.0247192	-12.2703	0				2009-01-27	4.58578	-0.21698	-10.5183	0.157383
2009-01-28	10.789	1.5137	-13.5293	0				2009-01-28	10.1687	-6.8396	-16.8379	0				2009-01-28	6.96065	2.05518	-11.2458	0
2009-01-29	10.5376	2.58484	-11.6938	0				2009-01-29	11.7647	-5.11417	-16.8729	0				2009-01-29	2.90593	-4.28909	-14.8384	0
2009-01-30	11.6959	5.41434	-10.4556	0				2009-01-30	10.4487	2.05747	-12.099	0				2009-01-30	11.5371	-5.31628	-16.0803	0
2009-01-31	11.0221	5.70508	-4.6922	0				2009-01-31	10.9929	2.39175	-10.5602	0				2009-01-31	11.9622	-0.654388	-13.424	0
2009-02-01	10.1031	3.69626	-4.31808	0				2009-02-01	10.2073	3.74133	-10.8919	0.00766835				2009-02-01	11.9831	-0.617706	-13.1858	0
2009-02-02	11.4512	3.82703	-5.33444	0				2009-02-02	11.7965	5.27939	-7.2579	0				2009-02-02	12.3551	1.08853	-10.4517	0
2009-02-03	10.8793	4.45407	-6.08945	0				2009-02-03	11.8514	4.40042	-9.44327	0				2009-02-03	12.5186	3.55258	-8.46139	0
2009-02-04	1.41168	1.92615	-5.35825	2.65503				2009-02-04	1.50203	3.50821	-8.24255	2.65507				2009-02-04	7.42192	2.96805	-6.39774	0
2009-02-05	3.63262	0.896942	-6.41208	1.00501				2009-02-05	2.36286	2.22916	-8.78085	0.160726				2009-02-05	11.9264	5.66785	-6.61822	0
2009-02-06	11.8339	-1.32288	-10.958	0				2009-02-06	12.6295	3.04813	-8.39954	0				2009-02-06	8.42051	3.96982	-11.504	0
2009-02-07	11.7535	-1.41113	-12.8284	0				2009-02-07	11.3988	-0.0710754	-10.3058	0.0148704				2009-02-07	12.9695	-2.3653	-14.4477	0
2009-02-08	12.1863	1.23074	-11.2034	0				2009-02-08	2.98049	1.75522	-10.1484	0.179994				2009-02-08	12.3991	1.8158	-9.20654	0
2009-02-09	11.6139	4.12915	-7.58438	0				2009-02-09	6.88377	1.24008	-10.0227	0.00525027				2009-02-09	9.37579	4.23041	-8.62851	0.00352316
2009-02-10	12.6898	5.64648	-5.80499	0				2009-02-10	9.66213	1.39325	-9.95563	0.0397709				2009-02-10	4.71121	9.24078	-4.72021	0.021075
2009-02-11	12.8516	4.56747	-5.63495	0				2009-02-11	10.1331	-4.10712	-13.7701	0.0420233				2009-02-11	9.43684	1.80844	-9.12997	0.00665102
2009-02-12	12.2275	6.48917	-4.95987	0.0177918				2009-02-12	7.3849	-4.04153	-15.9762	0.187485				2009-02-12	13.4073	6.3468	-8.37827	0
2009-02-13	7.55668	3.32321	-3.54962	0.027475				2009-02-13	8.84799	-2.66538	-14.2152	0.0706382				2009-02-13	13.0097	9.06506	-3.66504	0
2009-02-14	13.4413	3.36377	-5.86157	0				2009-02-14	12.8255	-3.08139	-15.6611	0.0279329				2009-02-14	8.27776	6.69632	-3.35861	0
2009-02-15	13.6212	4.05533	-6.82413	0				2009-02-15	14.1422	-1.84207	-12.8567	0				2009-02-15	8.07726	5.33585	-4.51386	0.038
2009-02-16	8.40178	2.65204	-5.37979	0.0853824				2009-02-16	11.3129	3.85642	-9.31027	0.0538202				2009-02-16	5.55131	6.92783	-4.20999	0.554516
2009-02-17	8.96922	-0.848572	-12.0351	0.0961975				2009-02-17	12.145	3.785	-6.9137	0				2009-02-17	12.4571	6.05402	-4.2016	0
2009-02-18	13.6221	-3.58279	-13.7818	0				2009-02-18	12.9751	8.56863	-4.67026	0				2009-02-18	13.9997	10.6412	-2.68582	0
2009-02-19	14.6276	-5.81992	-17.8138	0				2009-02-19	8.32052	1.19836	-8.86093	0.0519856				2009-02-19	13.6263	9.51221	-1.34885	0
2009-02-20	15.586	-0.675079	-18.0927	0				2009-02-20	14.5831	3.52225	-10.4421	0.0248998				2009-02-20	13.0731	11.3428	-1.93506	3.70512
2009-02-21	14.7357	2.47687	-14.3242	0				2009-02-21	12.9561	-1.55045	-11.2282	0				2009-02-21	9.6767	8.54184	-2.39456	0.0722203
2009-02-22	15.013	1.84247	-9.00287	0				2009-02-22	9.92838	0.066864	-10.3108	0.159346				2009-02-22	14.0832	15.1516	0.400971	0.257826
2009-02-23	15.403	-0.287109	-11.1786	0				2009-02-23	12.46	2.31525	-8.28201	0.0115446				2009-02-23	3.42519	4.15311	-6.79599	0.0373908
2009-02-24	16.3711	3.29843	-10.3293	0				2009-02-24	14.5132	2.46115	-9.92069	0.0080291				2009-02-24	5.776	-2.31174	-11.8841	0
2009-02-25	14.6438	3.66446	-6.26056	0.00802523				2009-02-25	15.042	-1.19571	-10.705	0				2009-02-25	11.0705	-6.97641	-15.1794	0.00762208
2009-02-26	6.86001	-2.32163	-11.2459	0.0288156				2009-02-26	11.2828	-0.133881	-11.073	0				2009-02-26	15.3021	-4.58591	-15.0437	0.0249579
2009-02-27	10.071	-2.94293	-14.6521	0.00816927				2009-02-27	9.74443	-0.657532	-11.1183	0				2009-02-27	16.4635	-1.08499	-12.2732	0
2009-02-28	17.4352	-2.21347	-16.1257	0				2009-02-28	15.0023	0.556976	-10.3535	0.0351359				2009-02-28	16.922	-0.170563	-9.51865	0
2009-03-01	5.65564	1.94211	-11.66	0.00790121				2009-03-01	13.6442	4.86081	-8.08832	0.0268671				2009-03-01	16.6388	3.05319	-9.02176	0
2009-03-02	10.9312	3.81131	-11.1849	0				2009-03-02	16.2909	1.95822	-9.04251	0				2009-03-02	18.1791	3.51578	-5.76926	0
2009-03-03	15.0226	5.10452	-6.71549	0				2009-03-03	15.3109	0.525604	-10.7859	0				2009-03-03	18.1496	10.2669	-2.15863	0
2009-03-04	16.5246	3.99576	-5.20816	0				2009-03-04	16.3406	4.40378	-8.23514	0.0144277				2009-03-04	12.8888	1.89227	-6.48276	0.0195632
2009-03-05	18.2701	7.14658	-5.79199	0				2009-03-05	17.3219	4.96689	-7.60324	0				2009-03-05	18.4561	6.07916	-6.34714	0
2009-03-06	18.4469	9.78488	-5.1091	0				2009-03-06	18.1044	5.72672	-7.17282	0.00585071				2009-03-06	18.5999	11.5223	-2.02405	0
2009-03-07	14.4031	3.53482	-3.05194	0				2009-03-07	11.19	4.5339	-7.20578	0.144912				2009-03-07	13.1708	9.9541	-0.77948	0
2009-03-08	19.5108	4.90488	-8.48126	0				2009-03-08	14.0198	2.76749	-7.8616	0.273957				2009-03-08	18.487	18.3022	2.66476	0
2009-03-09	19.2561	3.53409	-10.6786	0				2009-03-09	11.9538	9.55045	-4.17224	0.0075517				2009-03-09	16.6396	19.6036	2.5036	0
2009-03-10	18.7317	3.7565	-2.21854	0				2009-03-10	10.5669	5.5282	-5.28375	0.0222573				2009-03-10	13.6071	10.022	-9.76038	0
2009-03-11	18.576	6.29562	-2.77292	0				2009-03-11	12.2437	9.23584	-3.04132	0.0544376				2009-03-11	18.9641	0.486511	-10.8132	0
2009-03-12	13.9918	8.15747	-9.1908	0.0484023				2009-03-12	17.4205	10.0001	-4.97894	0				2009-03-12	11.535	3.68014	-6.25278	0
2009-03-13	19.7041	-3.15543	-14.5848	0				2009-03-13	16.2687	15.7289	0.532257	0.0659821				2009-03-13	16.3718	10.8194	-0.275604	0
2009-03-14	17.1527	-0.0796509	-16.8456	0				2009-03-14	13.2988	0.734528	-7.90237	0.0780117				2009-03-14	16.3606	8.9848	0.123779	0.0269426
2009-03-15	19.6909	6.39365	-3.28626	0				2009-03-15	18.1239	3.57535	-6.53409	0.0579377				2009-03-15	15.654	12.7922	-0.354736	0
2009-03-16	19.2278	11.8688	-0.584595	0				2009-03-16	8.35045	3.62668	-5.83432	0.673607				2009-03-16	19.9787	13.2624	1.39975	0
2009-03-17	17.9364	11.9825	-1.87802	0.0193298				2009-03-17	13.0572	7.12772	-3.31238	0.0234289				2009-03-17	19.9887	14.3299	1.46878	0
2009-03-18	19.8482	9.38156	-2.84723	0				2009-03-18	10.5034	6.65018	-3.14017	0				2009-03-18	13.9597	16.6908	2.46435	0.0362135
2009-03-19	18.0968	17.7392	0.719879	0				2009-03-19	18.3803	10.2675	-2.54593	0.0512916				2009-03-19	12.9451	19.335	8.76288	0.0468457
2009-03-20	9.30055	9.68332	-1.22669	0.0775221				2009-03-20	18.7056	12.8327	1.99161	0				2009-03-20	3.55345	12.9868	6.7804	0.887966
2009-03-21	18.0186	14.0845	-2.12253	0.0310863				2009-03-21	15.2058	19.134	4.62589	0.0210077				2009-03-21	3.77285	7.58649	1.50015	6.29883
2009-03-22	14.6946	10.3165	0.273834	0.0424751				2009-03-22	14.1269	8.21674	1.33212	0				2009-03-22	4.82584	6.61923	-0.155731	2.93198
2009-03-23	18.5639	14.1393	-0.511597	0.017887				2009-03-23	9.10678	4.88361	-5.15942	0				2009-03-23	6.71898	5.474	-1.14209	0.204227
2009-03-24	7.90374	14.3317	5.79703	0.615				2009-03-24	21.6613	9.20392	-2.30579	0				2009-03-24	16.815	4.9577	-3.09082	0.0800893
2009-03-25	7.36845	7.21668	1.1329	6.94745				2009-03-25	21.4743	12.6342	-0.393799	0				2009-03-25	12.8463	5.84598	-3.90781	0.0493835
2009-03-26	15.4369	10.0047	0.106842	0.0601651				2009-03-26	20.3741	15.0034	2.61014	0				2009-03-26	17.54	6.30896	-2.62851	0.0663814
2009-03-27	16.6004	11.6185	0.179474	0.0537727				2009-03-27	16.9507	12.4221	-2.60318	0.0269534				2009-03-27	16.4353	10.9862	-0.297058	0.140921
2009-03-28	21.2773	14.6823	-0.163849	0.0538831				2009-03-28	14.7673	8.26614	-3.47501	0.0713027				2009-03-28	14.9933	11.7881	0.946442	0.0475776
2009-03-29	10.5434	9.92557	0.620636	0.549666				2009-03-29	19.1631	8.67047	-3.26187	0				2009-03-29	20.6024	16.6458	1.58112	0.0537533
2009-03-30	14.3179	5.68661	-0.323395	0				2009-03-30	22.5378	6.17661	-4.54437	0				2009-03-30	19.1143	8.21939	-1.58639	0.0592841
2009-03-31	15.9664	8.99701	0.487976	0				2009-03-31	19.251	13.3203	1.80514	0				2009-03-31	11.4925	4.83554	-3.01285	0.259448
2009-04-01	16.8985	11.5301	1.60617	0.109148				2009-04-01	23.7087	8.90985	-2.90558	0				2009-04-01	16.452	7.42307	-1.78699	0.27607
2009-04-02	20.4581	14.8434	0.894898	0.0127194				2009-04-02	21.3009	8.01721	-3.14868	0.239524				2009-04-02	22.3356	7.84546	-0.695221	0
2009-04-03	21.9884	9.66583	0.0786743	0				2009-04-03	23.0973	13.0891	-2.07004	0				2009-04-03	22.1871	11.8527	0.32016	0
2009-04-04	22.5106	10.4445	-0.240479	0				2009-04-04	17.6658	15.3783	1.3291	0.0538879				2009-04-04	22.9402	15.083	3.92819	0
2009-04-05	23.5457	14.9394	1.44782	0				2009-04-05	19.8079	11.0272	-0.217316	0.0186487				2009-04-05	23.2451	15.7408	4.40646	0.023056
2009-04-06	24.1577	17.9677	2.97348	0				2009-04-06	12.3323	12.5185	2.37045	0.458946				2009-04-06	16.6239	15.262	3.94186	0.0396666
2009-04-07	21.1557	19.7273	5.3002	0				2009-04-07	13.6201	13.3754	1.69577	0.0785806				2009-04-07	15.2699	11.2248	1.93384	0
2009-04-08	22.0712	21.4809	6.22214	0.013966				2009-04-08	20.862	19.2156	5.32919	0				2009-04-08	15.9232	13.0339	3.00967	0
2009-04-09	10.6003	14.3408	7.95831	0.626556				2009-04-09	20.9675	23.106	7.37613	0.0240704				2009-04-09	21.2971	15.1502	3.7146	0.0335727
2009-04-10	5.33873	8.59534	3.33414	0.607917				2009-04-10	19.9174	16.6353	6.46603	0				2009-04-10	13.2228	12.425	3.07385	0.1377
2009-04-11	20.259	11.0558	2.11563	0.0618949				2009-04-11	20.0374	14.894	4.68756	0				2009-04-11	21.7781	19.6581	6.6922	0
2009-04-12	11.8768	10.2831	2.6236	0.203815				2009-04-12	20.918	23.2968	8.43698	0				2009-04-12	18.3609	18.3775	5.46149	0
2009-04-13	23.5702	16.3064	3.87759	0.0554785				2009-04-13	19.2468	23.9871	9.5484	0				2009-04-13	15.2487	15.3931	5.51178	0.152679
2009-04-14	21.715	16.8505	6.15988	0.0774537				2009-04-14	16.5771	16.6334	5.57404	0.134701				2009-04-14	21.9244	18.75	8.0629	0.027947
2009-04-15	23.8824	18.1037	6.29394	0				2009-04-15	13.6273	12.9422	1.86746	0.166735				2009-04-15	24.9658	18.033	6.405	0
2009-04-16	25.5406	19.9759	6.48593	0				2009-04-16	16.0717	12.0769	1.46875	6.27986				2009-04-16	24.7634	23.8938	9.56412	0
2009-04-17	26.2906	20.3882	7.34936	0				2009-04-17	19.7336	13.7237	4.23566	0.0148888				2009-04-17	21.5392	30.8141	15.1037	0.00758068
2009-04-18	25.2585	21.2874	8.45093	0				2009-04-18	22.905	16.7865	5.62811	0				2009-04-18	3.39286	20.2393	11.843	0.768396
2009-04-19	21.0268	21.3075	8.40356	0				2009-04-19	22.8346	16.8151	6.29651	0				2009-04-19	18.7341	18.9307	9.47934	0
2009-04-20	24.2685	23.7901	9.45877	0				2009-04-20	22.7672	17.4358	6.02258	0				2009-04-20	24.5525	26.559	12.2224	0
2009-04-21	16.1186	14.734	6.18372	0				2009-04-21	24.7591	22.4425	10.2978	0				2009-04-21	24.919	26.3785	15.0358	0
2009-04-22	24.3953	13.8894	3.73227	0				2009-04-22	24.8222	22.5311	11.2398	0.0468809				2009-04-22	18.2771	22.5819	14.5536	3.27218
2009-04-23	19.5003	13.1046	3.87647	0.0128941				2009-04-23	23.6344	19.7272	6.44311	0				2009-04-23	5.13615	12.915	7.75397	0.469951
2009-04-24	26.8831	17.6466	5.51807	0				2009-04-24	13.5331	16.2036	6.69443	0.0465292				2009-04-24	7.10623	11.4132	4.004	0.140152
2009-04-25	18.8085	21.2689	7.27493	0.00230803				2009-04-25	20.6398	17.5266	6.78781	0.271678				2009-04-25	20.5651	12.6529	4.09622	0.0132055
2009-04-26	24.8574	21.4955	9.00296	0				2009-04-26	27.2584	25.0103	10.9165	0				2009-04-26	23.1513	17.4134	6.06375	0.128991
2009-04-27	23.6109	25.5554	10.4077	0.154497				2009-04-27	25.7372	31.0552	16.1105	0				2009-04-27	25.4432	16.7051	3.79309	0
2009-04-28	12.5436	18.0404	8.51697	0.0673918				2009-04-28	23.6876	35.5163	19.892	0				2009-04-28	26.7863	12.9289	4.04214	0
2009-04-29	27.3759	15.6864	5.07626	0				2009-04-29	23.9636	31.367	16.6613	0.12299				2009-04-29	23.381	17.4875	7.51987	0
2009-04-30	26.9819	18.8171	5.6759	0.104643				2009-04-30	15.0076	24.7456	11.7472	4.1444				2009-04-30	26.498	21.7465	9.22589	0
2009-05-01	16.4983	19.6692	8.34363	0				2009-05-01	17.7686	17.4027	7.69394	0.336373				2009-05-01	27.3304	22.6617	8.85373	0
2009-05-02	25.5449	25.959	9.66898	0				2009-05-02	7.36306	14.3692	6.35898	0.0516778				2009-05-02	26.6639	23.8222	10.5824	0
2009-05-03	27.2947	30.4549	15.854	0				2009-05-03	25.5411	12.5069	1.05429	0.0258542				2009-05-03	26.9541	25.2145	12.0689	0
2009-05-04	24.8539	24.8719	12.2935	0.0096763				2009-05-04	28.2172	16.3429	4.98108	0				2009-05-04	23.0798	24.705	12.0395	0.248295
2009-05-05	25.2204	18.0353	8.09207	0				2009-05-05	27.2694	17.498	6.06018	0				2009-05-05	25.484	21.8937	10.1557	0
2009-05-06	24.7175	22.2476	10.0167	0				2009-05-06	25.5447	22.8218	11.386	0.363741				2009-05-06	25.5072	20.4693	9.79892	0.0603021
2009-05-07	26.1158	26.3889	13.8967	0				2009-05-07	14.8113	20.793	11.3138	1.80723				2009-05-07	27.341	22.0512	12.6345	0
2009-05-08	18.7347	25.7092	15.638	4.41206				2009-05-08	27.0755	23.7297	12.6334	0				2009-05-08	25.5633	23.6119	13.5126	0
2009-05-09	20.2656	26.5523	15.9774	0.300497				2009-05-09	16.6536	21.7787	13.5604	0				2009-05-09	27.5774	25.689	12.6334	0
2009-05-10	16.1703	18.4991	8.90006	0.266857				2009-05-10	23.9699	23.0257	13.263	0				2009-05-10	26.5942	22.2407	9.47708	0
2009-05-11	28.3281	17.8497	6.09531	0				2009-05-11	10.6526	21.1083	13.4224	0				2009-05-11	27.3752	24.6708	13.3513	0
2009-05-12	28.5029	17.7834	8.14243	0				2009-05-12	27.2867	27.5551	16.6953	0				2009-05-12	22.9433	27.9728	11.0404	0.0602762
2009-05-13	28.2172	22.8124	10.5818	0				2009-05-13	26.8983	29.2053	16.481	0				2009-05-13	25.7556	19.7865	7.68195	0.941315
2009-05-14	27.0464	26.3162	13.1544	43.8301				2009-05-14	22.5965	29.5626	17.4086	0				2009-05-14	22.7239	15.9695	7.52621	0.585548
2009-05-15	26.3986	27.5001	16.9732	0				2009-05-15	25.8206	32.2088	18.01	0				2009-05-15	27.6711	19.5337	9.87021	0
2009-05-16	28.8494	24.7951	12.8368	0				2009-05-16	26.7924	24.6868	9.43124	2.61384				2009-05-16	28.5695	22.7889	10.551	0
2009-05-17	26.1401	30.2506	15.4579	0				2009-05-17	12.6424	15.7771	7.43961	3.92318				2009-05-17	26.5947	22.8309	12.7868	0
2009-05-18	13.7712	18.5748	10.9198	0.197975				2009-05-18	20.1672	21.9516	9.79013	0.550126				2009-05-18	27.1424	25.8084	13.3021	0
2009-05-19	28.7887	19.5756	9.03622	0				2009-05-19	26.8295	22.902	11.6188	0				2009-05-19	28.1634	25.0256	13.8241	0
2009-05-20	28.2628	23.4034	10.2687	0				2009-05-20	27.9013	24.9748	14.0981	0				2009-05-20	25.4057	33.723	18.3245	1.69903
2009-05-21	27.1412	27.2427	12.1619	0.033962				2009-05-21	26.9056	24.9945	14.3886	0				2009-05-21	18.1068	22.1045	16.6187	0.108125
2009-05-22	26.7525	28.6238	17.9593	0				2009-05-22	27.2281	28.165	15.6788	0				2009-05-22	27.1936	25.9106	15.9276	0
2009-05-23	21.3515	24.2145	11.3111	0.0342665				2009-05-23	26.7078	30.792	17.88	0				2009-05-23	28.4544	28.0112	17.3809	0
2009-05-24	32.3961	18.3103	8.18173	0				2009-05-24	27.0108	29.3927	18.5783	0				2009-05-24	27.8424	28.6693	17.6197	0
2009-05-25	30.151	23.1297	10.3611	0				2009-05-25	16.5536	26.1419	17.7868	0				2009-05-25	25.1119	29.7426	17.94	0.236876
2009-05-26	31.3415	27.9183	14.2668	0				2009-05-26	21.7529	26.5714	16.1058	0				2009-05-26	27.156	27.8032	17.8238	0.267169
2009-05-27	19.0495	27.5905	15.613	0.00899124				2009-05-27	25.3663	24.467	15.1042	0				2009-05-27	17.3499	25.3993	17.0812	19.1929
2009-05-28	28.827	22.7742	11.7737	0				2009-05-28	23.6516	26.382	16.559	0.769962				2009-05-28	16.4717	20.725	13.2972	0.371595
2009-05-29	27.9737	20.6761	10.4962	0.0518271				2009-05-29	13.2651	21.5202	10.5269	2.73822				2009-05-29	17.4194	19.5324	12.2214	0.0633903
2009-05-30	28.5794	23.5634	12.6174	0				2009-05-30	28.5978	21.5718	11.7938	0				2009-05-30	19.5541	20.3694	11.009	0.0994702
2009-05-31	28.0345	27.6097	16.039	0				2009-05-31	28.4436	25.7588	14.8917	0				2009-05-31	19.8144	21.292	12.3406	0.0121411
2009-06-01	26.748	30.5679	19.1306	0.0974818				2009-06-01	29.3268	29.0481	17.5071	0				2009-06-01	19.6588	22.5752	13.9677	0
2009-06-02	18.7784	27.4691	19.2382	0.511793				2009-06-02	28.8038	31.5566	19.6086	0				2009-06-02	23.4117	27.084	15.7282	0
2009-06-03	8.76088	21.8989	15.2773	0				2009-06-03	29.3484	32.8946	20.4342	0				2009-06-03	11.1668	22.6569	16.7185	1.50327
2009-06-04	28.6236	30.6072	17.2996	0.131839				2009-06-04	27.7846	33.9749	21.9691	0				2009-06-04	25.56	31.8395	17.6819	0
2009-06-05	23.7839	27.7293	17.1539	0.214033				2009-06-05	23.7157	34.6678	22.1067	0.0923517				2009-06-05	26.3592	23.5834	13.1682	0
2009-06-06	28.1083	28.1816	18.4248	0				2009-06-06	28.8981	29.1725	18.4973	0				2009-06-06	28.5102	26.3516	17.2765	0
2009-06-07	24.9245	31.0409	18.6729	0				2009-06-07	28.3011	25.8511	16.8382	0				2009-06-07	25.785	30.408	20.2032	0.1482
2009-06-08	24.9682	33.6569	20.9102	0.694492				2009-06-08	29.1704	25.0523	15.8988	0.075378				2009-06-08	17.6302	24.4888	15.0905	0
2009-06-09	20.1092	23.9736	14.4953	0.366753				2009-06-09	28.7842	24.195	16.0632	0				2009-06-09	29.0456	24.2871	12.3008	0
2009-06-10	16.3013	17.7175	11.7944	2.87337				2009-06-10	28.9294	29.6182	17.8894	0				2009-06-10	29.0358	26.1677	17.113	0
2009-06-11	26.8726	24.5859	13.0172	0				2009-06-11	23.1262	28.9725	13.7552	3.10874				2009-06-11	28.6885	29.0359	15.5822	0.00877668
2009-06-12	28.5081	28.9276	17.2263	0				2009-06-12	21.8654	23.5358	15.1305	0				2009-06-12	28.8812	25.5224	16.8104	0
2009-06-13	14.9131	27.3856	19.0595	0.254208				2009-06-13	27.9226	24.3479	16.4584	0.117923				2009-06-13	27.7326	28.9082	19.508	0
2009-06-14	17.3307	27.7388	19.9089	0.0564533				2009-06-14	24.4813	23.7871	16.68	0.392618				2009-06-14	26.1388	29.1637	19.8254	0.332301
2009-06-15	5.22084	19.9223	13.8947	0.338644				2009-06-15	23.4876	25.8771	17.059	0				2009-06-15	21.2073	30.4868	17.0184	0
2009-06-16	13.1887	22.3385	16.2499	0.797785				2009-06-16	24.3493	26.1062	17.5601	0				2009-06-16	27.8725	27.8069	16.0993	0
2009-06-17	16.5479	23.022	18.0537	0				2009-06-17	28.526	29.5881	19.7885	0.0112331				2009-06-17	25.8068	31.2661	21.8016	0
2009-06-18	25.9687	28.3973	17.5639	0.561541				2009-06-18	28.0033	28.5716	18.9956	0				2009-06-18	27.6419	33.1651	18.5529	0
2009-06-19	25.1715	30.0668	17.734	0.0640794				2009-06-19	26.2243	28.6616	19.1118	0				2009-06-19	23.2438	29.6806	19.9961	0.137131
2009-06-20	26.5287	30.156	17.5514	0.11033				2009-06-20	14.6661	24.9827	16.6921	0				2009-06-20	24.0525	29.054	19.4085	0.498668
2009-06-21	11.6961	28.1417	17.2451	0				2009-06-21	19.9031	24.1131	16.5482	0				2009-06-21	10.8731	24.5838	18.0485	14.2459
2009-06-22	28.5641	28.4147	17.067	0				2009-06-22	15.9353	22.8152	13.6236	0				2009-06-22	14.2799	23.0334	16.5175	2.61672
2009-06-23	29.1919	28.9726	17.69	0				2009-06-23	13.6082	20.9539	14.0912	0.72529				2009-06-23	14.1905	24.0404	16.0165	0.129276
2009-06-24	28.6476	30.2971	19.1708	0				2009-06-24	26.5626	25.1911	15.6217	0				2009-06-24	22.0722	25.356	16.6673	0.0341829
2009-06-25	27.7862	28.9527	19.4237	0				2009-06-25	26.9229	26.6563	16.0223	0.0886065				2009-06-25	18.4274	22.9555	16.7612	0.0765746
2009-06-26	24.4574	27.4202	19.8273	0				2009-06-26	26.4488	26.0435	14.1021	0.0823545				2009-06-26	24.4833	28.1357	17.6265	0
2009-06-27	8.4672	24.3964	20.173	0.4976				2009-06-27	28.7243	27.2327	15.9557	0				2009-06-27	23.2992	31.775	21.3034	0.231892
2009-06-28	21.0402	28.0485	19.6569	0.344376				2009-06-28	23.8488	26.5475	18.1551	0				2009-06-28	24.6061	31.0469	21.8484	0.619814
2009-06-29	23.5061	30.1152	18.9354	0				2009-06-29	24.7553	28.3574	19.2106	0				2009-06-29	25.7571	30.1732	21.6272	0
2009-06-30	29.1141	30.1688	19.3354	0				2009-06-30	28.5709	31.0387	20.6939	0				2009-06-30	26.6192	28.6853	20.914	0.315128
2009-07-01	26.7611	31.6042	20.6489	0				2009-07-01	24.6364	30.3225	20.8203	0				2009-07-01	11.9648	23.6092	19.0169	11.4851
2009-07-02	22.5386	33.4027	23.3895	5.10892				2009-07-02	18.0624	29.707	20.9199	0				2009-07-02	24.3237	25.325	18.3145	3.17531
2009-07-03	7.8015	23.5044	19.4586	7.85553				2009-07-03	25.3915	31.5841	20.0845	0				2009-07-03	26.4441	26.8741	19.1618	0.397391
2009-07-04	10.9609	21.0872	17.1898	4.44109				2009-07-04	11.9454	24.227	18.2861	9.18396				2009-07-04	25.4151	27.5353	19.8294	0.21425
2009-07-05	26.066	29.8621	19.5036	0.265756				2009-07-05	24.8349	27.182	18.491	1.92755				2009-07-05	26.4429	28.488	19.3913	0
2009-07-06	14.771	22.1548	16.2171	1.14321				2009-07-06	12.8603	27.6562	17.5234	0.205932				2009-07-06	24.8339	31.5875	20.7027	0
2009-07-07	28.2466	25.4998	17.2031	0				2009-07-07	20.1868	28.9879	18.906	0				2009-07-07	28.0335	27.0475	16.0461	0
2009-07-08	27.1966	26.0643	17.5519	0.0736768				2009-07-08	25.9876	30.8028	18.7256	0.123638				2009-07-08	26.7271	26.8957	17.602	0
2009-07-09	20.5015	25.9213	17.2378	0.0757176				2009-07-09	23.9623	28.6527	19.8475	0				2009-07-09	27.097	28.1375	17.752	0
2009-07-10	28.5604	29.4634	19.3319	0				2009-07-10	28.2105	30.1548	19.6288	0				2009-07-10	22.7282	28.1833	20.6887	0.270684
2009-07-11	27.6478	32.196	21.1613	0				2009-07-11	24.3838	30.6124	19.5133	0.413884				2009-07-11	13.9947	26.7303	20.3298	3.08928
2009-07-12	22.5521	30.8618	22.1245	0.905574				2009-07-12	24.4329	31.6794	21.8438	0.463736				2009-07-12	14.2149	26.8778	19.6508	2.8795
2009-07-13	12.002	26.3453	20.3112	3.31756				2009-07-13	18.3017	29.0393	18.7854	45.0381				2009-07-13	15.2901	26.8451	20.3927	0.892502
2009-07-14	18.8485	27.9823	22.1706	1.43995				2009-07-14	22.8833	28.455	18.7089	0.382069				2009-07-14	12.5357	25.7769	19.3461	0.0461479
2009-07-15	21.0291	28.7628	21.6002	2.58267				2009-07-15	18.9114	30.3255	19.9371	0				2009-07-15	22.8027	29.4123	19.7394	0.0380458
2009-07-16	20.4507	25.8709	20.5405	4.37666				2009-07-16	26.4663	33.2525	22.6834	0.392219				2009-07-16	21.3465	28.6945	22.2453	0
2009-07-17	23.733	28.791	20.5594	0.300081				2009-07-17	22.364	32.972	19.3536	0.0550876				2009-07-17	17.2135	28.7199	21.4966	0
2009-07-18	26.3482	29.7874	20.9637	0				2009-07-18	23.6597	33.524	20.8318	0.111139				2009-07-18	13.8167	26.2685	20.3535	0.0632307
2009-07-19	26.4291	30.3881	22.243	0.463036				2009-07-19	20.8199	33.1156	22.1072	0				2009-07-19	14.4044	26.0839	19.5922	1.30591
2009-07-20	23.1864	28.0471	21.1914	2.29009				2009-07-20	18.2266	31.0412	21.167	0.410195				2009-07-20	17.1339	25.6337	18.7298	1.15346
2009-07-21	25.574	28.1993	19.3104	0				2009-07-21	27.283	29.5567	19.6897	0				2009-07-21	9.55223	22.3129	17.8159	1.07338
2009-07-22	25.2967	31.5894	20.6656	0				2009-07-22	26.6079	28.9126	19.4797	0				2009-07-22	22.9091	25.1284	18.3357	1.38992
2009-07-23	24.0938	33.948	23.2557	0				2009-07-23	27.0304	28.6663	19.849	0.230143				2009-07-23	24.1818	26.0464	19.305	0.312936
2009-07-24	25.8547	32.7204	23.0962	0				2009-07-24	27.214	29.8626	20.8679	0				2009-07-24	23.2786	27.5973	18.8285	0.0872427
2009-07-25	22.2992	34.179	24.3147	1.00197				2009-07-25	27.6703	30.4453	21.4107	0				2009-07-25	21.2361	26.7211	18.6884	0
2009-07-26	8.82705	30.1001	21.8423	2.81338				2009-07-26	27.1633	29.9979	21.4649	0.0967603				2009-07-26	25.6885	27.0624	20.2285	0.273646
2009-07-27	10.7575	26.5395	21.6701	1.16206				2009-07-27	28.0041	31.093	21.4886	0				2009-07-27	24.9232	28.0416	19.9706	0
2009-07-28	14.6061	28.2191	19.6251	11.6912				2009-07-28	24.7913	34.4053	22.3029	0				2009-07-28	26.2183	28.5989	19.4445	0.108583
2009-07-29	10.7778	23.975	16.3528	0.156381				2009-07-29	21.3025	34.6823	23.6289	0				2009-07-29	23.4698	28.9399	20.2533	0.127897
2009-07-30	27.1701	29.6828	18.3354	0				2009-07-30	23.9926	36.0424	24.7349	0.15967				2009-07-30	21.1427	28.1551	20.714	0.346734
2009-07-31	26.2194	27.6524	18.0911	0				2009-07-31	26.0309	37.4427	24.629	0				2009-07-31	11.5507	22.2015	18.3261	3.14836
2009-08-01	11.947	23.9997	17.3424	0.260877				2009-08-01	19.2278	34.7606	23.6458	0				2009-08-01	18.4764	27.0661	18.988	2.50004
2009-08-02	24.7682	26.8058	17.3517	0.115078				2009-08-02	24.7669	34.563	23.3858	0				2009-08-02	12.012	24.7801	18.4513	2.63293
2009-08-03	26.7236	26.6484	16.9124	0				2009-08-03	22.4318	29.4126	21.5963	0				2009-08-03	14.9583	26.5653	19.1721	0.876632
2009-08-04	24.9228	27.9101	18.0443	0.0568679				2009-08-04	26.1397	28.1725	19.7686	0.0849514				2009-08-04	25.4774	29.2572	21.2372	0.128262
2009-08-05	25.4101	28.8248	18.946	0				2009-08-05	25.5535	28.0016	18.5033	0.0660525				2009-08-05	22.6412	28.9424	18.8749	0.108611
2009-08-06	23.4179	30.8227	20.7441	0				2009-08-06	26.0271	30.0318	19.6804	0				2009-08-06	24.3556	27.9563	19.9826	0.052064
2009-08-07	20.351	30.6197	22.0317	0.950127				2009-08-07	14.4449	30.3867	20.6263	0.105399				2009-08-07	18.9161	25.2834	19.3235	0
2009-08-08	14.6665	26.7598	20.016	0.880911				2009-08-08	18.8411	28.7684	21.1083	4.00868				2009-08-08	21.0492	29.8054	20.8102	0.0810296
2009-08-09	24.065	28.7178	19.6031	0.226004				2009-08-09	11.6134	22.9321	17.8098	14.4907				2009-08-09	17.8776	28.4715	20.6939	0.247908
2009-08-10	21.3774	28.4777	20.046	0				2009-08-10	20.8344	26.2339	16.4191	2.6396				2009-08-10	11.0851	25.2149	18.7097	8.04507
2009-08-11	19.952	28.5822	21.0944	4.62474				2009-08-11	20.3738	29.7571	18.279	0				2009-08-11	7.64513	25.0192	18.6499	5.27928
2009-08-12	25.0098	30.3364	17.1332	0				2009-08-12	25.5257	28.385	14.9042	0.151121				2009-08-12	6.33634	18.1819	16.0363	8.61619
2009-08-13	23.4798	29.7887	17.8462	0.116865				2009-08-13	26.3441	29.5025	16.9713	0				2009-08-13	10.6816	22.9044	15.4428	8.85869
2009-08-14	25.1821	31.0452	15.8584	0				2009-08-14	25.7118	32.3416	18.6957	0				2009-08-14	3.19156	22.0604	17.5978	10.2659
2009-08-15	27.0712	28.7396	15.5531	0				2009-08-15	24.408	34.2606	20.9382	0.392995				2009-08-15	5.53642	19.5524	14.6155	6.11196
2009-08-16	25.3406	30.4138	16.758	0				2009-08-16	13.8087	28.6353	20.2701	1.92177				2009-08-16	7.99474	24.2937	13.521	2.3176
2009-08-17	25.4996	30.7001	19.4051	0				2009-08-17	15.3737	27.5794	19.6044	0.195217				2009-08-17	8.84086	24.7738	17.9765	23.764
2009-08-18	24.7844	29.3323	19.2721	0				2009-08-18	22.6559	30.4939	20.5935	0.168582				2009-08-18	2.98245	19.2244	16.5296	24.2695
2009-08-19	24.4954	29.7037	19.6945	0				2009-08-19	20.9392	29.5443	18.5352	6.73217				2009-08-19	1.94013	19.4533	14.2046	6.89705
2009-08-20	23.5173	29.1369	20.3495	0				2009-08-20	12.277	23.4829	15.5592	1.0934				2009-08-20	8.44426	19.8426	12.7284	2.85239
2009-08-21	20.2733	30.1474	20.4302	0				2009-08-21	19.0383	25.5225	16.3559	0.0650646				2009-08-21	22.7585	24.2335	15.7475	0
2009-08-22	18.7926	30.5171	19.9451	0.854002				2009-08-22	21.8958	27.6588	17.3369	0				2009-08-22	14.748	20.8528	15.4904	1.94304
2009-08-23	8.26422	24.6971	17.3522	3.54894				2009-08-23	10.9197	25.5375	17.2538	0.760513				2009-08-23	7.2325	18.8826	14.5219	6.11434
2009-08-24	12.7349	22.1146	17.8942	0.352844				2009-08-24	24.7543	30.523	16.4002	0.167909				2009-08-24	13.0942	19.7582	14.479	0.568836
2009-08-25	16.1265	26.9247	19.1446	0.747412				2009-08-25	21.3699	24.3634	16.6486	0				2009-08-25	22.1486	23.5011	16.4316	0.0843977
2009-08-26	11.2782	27.9348	19.5206	0.987289				2009-08-26	22.2006	30.2517	18.2856	0.0170943				2009-08-26	21.2685	26.9446	17.6336	0
2009-08-27	5.26071	20.692	15.0125	0.191162				2009-08-27	18.7375	29.8285	18.2516	0.0950267				2009-08-27	15.5159	23.1258	15.6625	0
2009-08-28	12.1517	21.5937	13.6513	0.202002				2009-08-28	11.9915	27.3945	18.2652	0				2009-08-28	6.08072	20.1267	14.3242	7.7145
2009-08-29	12.3672	21.7405	14.5297	0				2009-08-29	11.6391	28.2993	17.7723	0.187084				2009-08-29	23.2948	25.7229	15.7092	0
2009-08-30	21.4108	25.1566	15.1719	0				2009-08-30	13.3681	26.0464	18.7889	0.992415				2009-08-30	21.4851	25.62	14.9556	0.784497
2009-08-31	20.1296	24.5114	15.0385	0.102525				2009-08-31	9.73051	24.8194	14.7823	8.81876				2009-08-31	21.7155	25.9983	14.6883	0
2009-09-01	14.6404	20.5106	14.436	1.61426				2009-09-01	13.8395	19.2847	10.7398	0				2009-09-01	22.7165	22.8362	12.8202	0.181533
2009-09-02	17.9841	16.5494	11.7383	22.8152				2009-09-02	18.1565	21.4355	12.5424	0				2009-09-02	21.6679	23.4506	13.0512	0
2009-09-03	21.3277	21.8199	11.4557	0				2009-09-03	15.1043	23.6926	13.6707	0				2009-09-03	21.4499	23.3993	14.9914	0
2009-09-04	23.4812	23.1646	11.786	0				2009-09-04	14.3157	26.6592	15.3997	0.0708996				2009-09-04	21.7722	27.1394	16.8118	0.0913291
2009-09-05	19.07	26.0894	13.3194	0.134756				2009-09-05	12.6569	26.1653	14.9745	0.101723				2009-09-05	23.3413	24.3	11.5806	0
2009-09-06	7.43143	17.1816	12.5791	12.805				2009-09-06	15.9729	27.7345	16.9354	0				2009-09-06	20.8202	21.4187	12.7171	3.41913
2009-09-07	10.5709	15.4759	12.0067	5.95635				2009-09-07	10.588	28.5455	15.7439	3.76705				2009-09-07	5.3343	16.738	11.4261	3.75253
2009-09-08	20.4387	21.4402	10.6503	1.84015				2009-09-08	6.26256	21.2033	14.0329	1.34301				2009-09-08	18.1836	24.4246	14.5927	0.251282
2009-09-09	12.097	20.5925	14.5501	0.426594				2009-09-09	2.02044	12.7243	8.82669	5.67215				2009-09-09	20.0086	22.9183	10.0307	0
2009-09-10	20.327	25.1778	14.9746	0				2009-09-10	6.37524	15.9883	9.33621	13.9655				2009-09-10	21.4635	21.133	9.68338	0
2009-09-11	20.6131	25.7564	15.1337	0				2009-09-11	11.4461	17.4823	9.32556	0.431265				2009-09-11	21.7487	18.4395	7.04019	0
2009-09-12	11.1072	24.3017	15.0835	0.0160113				2009-09-12	11.9819	16.3852	9.07645	0				2009-09-12	23.2548	19.3352	7.89206	0
2009-09-13	18.3733	25.5567	15.4331	0.0518283				2009-09-13	9.0932	17.302	10.2509	0.52018				2009-09-13	19.2975	20.341	10.9152	0.0290046
2009-09-14	20.506	27.1257	15.7528	0				2009-09-14	15.1662	21.1091	10.9191	0.0454796				2009-09-14	20.0351	21.9542	11.9377	0.0431696
2009-09-15	18.8491	29.4238	16.1473	0.0790358				2009-09-15	18.3717	24.198	13.2495	2.01124				2009-09-15	20.2735	25.0398	13.6251	0.00886018
2009-09-16	12.2926	28.3972	17.1582	1.10945				2009-09-16	6.49984	19.7227	9.53726	2.17099				2009-09-16	15.7199	22.3052	13.6512	0.186851
2009-09-17	19.0664	26.3249	15.3151	0.0448815				2009-09-17	19.9571	20.9624	10.4204	0				2009-09-17	15.6845	23.7817	14.0283	0.597738
2009-09-18	7.50865	23.6225	14.9383	1.86771				2009-09-18	20.308	20.7915	10.6997	0				2009-09-18	11.2448	18.8801	8.60068	0.558349
2009-09-19	17.4836	24.871	12.4552	0				2009-09-19	19.7553	22.8376	9.72443	0.039103				2009-09-19	11.7259	16.9696	8.97037	0.466245
2009-09-20	19.8847	22.2599	10.665	0				2009-09-20	20.2046	19.5229	7.55933	0				2009-09-20	7.42477	18.2549	7.8801	2.14191
2009-09-21	19.9982	25.0569	10.8842	0				2009-09-21	19.5437	23.2606	10.9028	0.0649016				2009-09-21	20.1632	22.9337	7.95914	0
2009-09-22	13.3806	20.6513	9.56457	0.193432				2009-09-22	16.0106	22.0782	9.1741	0.0358492				2009-09-22	19.8184	19.606	8.56607	0
2009-09-23	19.3242	19.4631	8.42828	0				2009-09-23	19.5688	22.3904	10.8619	0				2009-09-23	19.7783	20.0959	7.10971	0
2009-09-24	18.0283	24.8629	8.8934	3.89372				2009-09-24	20.0675	17.5261	5.75748	0.0728136				2009-09-24	20.0786	19.807	3.80926	0
2009-09-25	7.97	15.8333	7.07437	3.51398				2009-09-25	18.6392	17.528	7.06201	0				2009-09-25	19.0801	20.5801	7.34253	0.0202304
2009-09-26	18.9538	19.0588	6.37082	0				2009-09-26	17.3049	20.9588	9.36041	0				2009-09-26	18.8251	20.5682	8.63596	0.0832173
2009-09-27	16.0437	21.6851	8.91705	0.335652				2009-09-27	18.8949	23.8946	11.0563	0				2009-09-27	17.9373	21.0525	7.38065	0
2009-09-28	3.3358	16.2403	11.0302	3.30264				2009-09-28	18.5592	20.0864	9.43216	0				2009-09-28	19.1232	20.97	7.72806	0
2009-09-29	12.9231	15.5215	4.09064	0.122622				2009-09-29	12.2604	21.6225	10.1767	0				2009-09-29	18.6189	22.0535	8.06833	0
2009-09-30	13.3446	17.9215	4.36758	0.0803219				2009-09-30	10.5967	19.786	10.4229	0.306344				2009-09-30	17.5709	21.5548	8.04364	0
2009-10-01	19.004	20.098	5.64603	0				2009-10-01	17.4149	20.5883	9.24829	0.077413				2009-10-01	18.3222	21.5204	6.91122	0
2009-10-02	17.6351	21.7859	8.65036	0				2009-10-02	16.6518	17.4314	7.54495	0.115268				2009-10-02	18.736	23.0132	8.68796	0
2009-10-03	15.0283	21.4185	10.0881	0				2009-10-03	18.1002	19.4631	7.134	0				2009-10-03	18.4159	25.1705	10.1001	0
2009-10-04	11.3559	17.8588	10.5992	0.304174				2009-10-04	17.9167	23.6589	10.542	0				2009-10-04	15.9176	19.5534	9.12088	0.236664
2009-10-05	11.3858	14.3831	3.31485	0.235084				2009-10-05	16.7752	23.5716	10.4437	0.0404933				2009-10-05	10.4144	15.85	5.06845	2.16746
2009-10-06	15.6057	14.2128	1.90176	0				2009-10-06	10.059	21.8446	9.31024	0.0193652				2009-10-06	7.80857	16.4984	6.26318	0.238801
2009-10-07	15.8202	14.0791	-1.41718	0				2009-10-07	16.6236	24.4121	10.9615	0				2009-10-07	17.165	18.8279	6.28522	0.007202
2009-10-08	17.9778	18.9362	-2.25281	0				2009-10-08	8.81831	21.8859	10.4344	5.5835				2009-10-08	15.6267	20.1295	8.35071	0.453529
2009-10-09	17.0639	22.106	4.83609	0.0250102				2009-10-09	15.4541	13.0971	4.60471	0.265073				2009-10-09	13.6871	19.6826	9.0936	3.97879
2009-10-10	13.0011	21.8207	8.7915	0.0697426				2009-10-10	14.6148	18.2403	7.88461	0				2009-10-10	6.85372	17.2564	8.64056	0.790004
2009-10-11	14.7654	18.6603	8.84943	0.135191				2009-10-11	13.9401	14.6205	6.35715	0				2009-10-11	11.3924	18.5593	9.16354	0.500462
2009-10-12	10.1364	19.454	8.48721	0				2009-10-12	14.7884	13.9078	3.76404	0				2009-10-12	6.09081	12.3827	7.02731	9.2998
2009-10-13	14.5113	24.6757	10.0425	1.69144				2009-10-13	14.7919	15.0648	4.28641	0				2009-10-13	11.6607	16.3338	5.2829	0.0407085
2009-10-14	12.95	13.4995	6.38843	0.386429				2009-10-14	15.9807	14.3207	2.79703	0				2009-10-14	13.1047	15.2095	4.33481	0
2009-10-15	5.44033	12.6116	5.02286	1.98181				2009-10-15	14.5998	14.6799	2.64926	0				2009-10-15	8.90238	14.4221	4.78143	0.322402
2009-10-16	15.0079	16.5059	4.24268	0				2009-10-16	13.6555	18.1645	4.09259	0				2009-10-16	15.5754	17.6681	5.88251	0
2009-10-17	8.30943	16.201	2.90985	2.74493				2009-10-17	15.7869	17.1112	4.94199	0				2009-10-17	14.2836	15.6929	2.82364	0.0800319
2009-10-18	1.19374	7.2048	2.24307	1.26012				2009-10-18	13.5694	18.921	6.48282	0				2009-10-18	14.4728	10.4474	-0.38208	0.0747985
2009-10-19	8.77741	11.4109	2.46845	0.0536782				2009-10-19	15.2018	16.9299	6.01654	0				2009-10-19	15.4076	12.1285	1.13919	0
2009-10-20	12.1981	13.1037	1.92184	0				2009-10-20	13.9536	17.5625	5.73505	0				2009-10-20	14.9111	11.0615	-0.533386	0
2009-10-21	14.7335	17.2959	4.09808	0				2009-10-21	8.12736	16.844	5.4617	0				2009-10-21	13.7146	13.7901	0.953156	0.119715
2009-10-22	13.8277	16.9483	5.729	0.730469				2009-10-22	9.83984	16.7638	5.98968	0				2009-10-22	14.1176	16.3062	1.39081	0
2009-10-23	1.81136	11.9544	2.91116	5.90415				2009-10-23	14.3932	18.8211	5.73981	0				2009-10-23	14.1312	14.7222	2.33365	0.0615962
2009-10-24	14.3481	10.7759	-0.424377	0				2009-10-24	14.447	20.3543	6.2149	0				2009-10-24	10.4203	13.0455	1.26645	0.21632
2009-10-25	14.2426	12.4518	-1.50558	0				2009-10-25	13.8947	17.7597	6.48218	2.02679				2009-10-25	9.15808	9.62509	1.33109	1.88238
2009-10-26	12.8406	14.006	-1.76419	0.0439418				2009-10-26	2.15255	7.91251	-1.47247	0.760231				2009-10-26	12.7378	17.555	2.14294	0.0298641
2009-10-27	14.0398	14.4233	0.336273	0				2009-10-27	7.5682	6.52585	-5.3826	0.0548423				2009-10-27	9.6876	17.2176	6.19272	0.0616882
2009-10-28	14.1356	14.4975	-1.07535	0				2009-10-28	13.6717	9.5607	-2.99341	0				2009-10-28	9.36734	11.5782	1.77652	0.166146
2009-10-29	13.1791	17.2912	1.39514	0				2009-10-29	13.7397	8.41425	-4.1795	0.0383526				2009-10-29	11.8145	12.1868	-0.510437	0
2009-10-30	11.8989	16.7814	1.97436	0.0198601				2009-10-30	12.4274	8.69678	-3.78546	0.0752079				2009-10-30	11.673	10.1298	-1.34152	0
2009-10-31	12.2429	13.5582	1.11484	0				2009-10-31	13.0778	12.1801	-0.888336	0				2009-10-31	9.6281	9.07632	-1.58872	0.128807
2009-11-01	12.8907	13.9822	0.0751648	0.069332				2009-11-01	12.7932	13.1368	1.10196	0				2009-11-01	10.4767	8.12759	-2.54913	0.00803531
2009-11-02	8.36157	13.0021	1.49643	0.0354726				2009-11-02	11.8251	14.0558	1.52801	0.0762976				2009-11-02	12.5588	13.1793	-1.54288	0.0232047
2009-11-03	10.5763	14.6428	-0.0371094	0.0141623				2009-11-03	11.0958	14.3472	1.17133	0.0792448				2009-11-03	8.93954	11.8605	-1.17764	0.0538165
2009-11-04	12.666	14.0318	-1.85043	0				2009-11-04	12.2836	11.2848	-0.654175	0				2009-11-04	12.1204	12.8033	1.32275	0.0316989
2009-11-05	12.8494	16.1742	-0.10257	0				2009-11-05	12.4108	9.94482	-2.2338	0				2009-11-05	12.5013	15.051	1.83789	0
2009-11-06	10.9319	9.74844	0.132019	0				2009-11-06	9.33662	9.56293	-0.911591	0.0747337				2009-11-06	11.4626	11.3827	1.27115	0
2009-11-07	10.5718	12.0267	-0.564026	0.0494076				2009-11-07	11.4213	2.38889	-3.38986	0.0286861				2009-11-07	11.4733	16.2551	1.92484	0.0322441
2009-11-08	10.2454	16.5915	4.01178	0				2009-11-08	8.72612	13.2274	-0.0321655	0				2009-11-08	11.6619	17.0723	4.11942	0
2009-11-09	11.112	12.5497	1.62411	0				2009-11-09	11.4259	6.26312	-3.73077	0				2009-11-09	11.9449	13.7222	0.308868	0
2009-11-10	10.7331	15.8073	0.327911	0				2009-11-10	11.2537	7.04236	-4.34439	0				2009-11-10	11.7569	16.9105	2.57648	0
2009-11-11	10.8077	15.9809	1.53882	0				2009-11-11	9.6541	6.81122	0.0394897	0				2009-11-11	11.6628	17.9226	2.77353	0
2009-11-12	9.73891	7.70035	-2.94391	0				2009-11-12	7.00402	7.39102	-2.22604	0.0302068				2009-11-12	8.56146	9.16202	-2.52799	0.0231004
2009-11-13	10.6697	5.17645	-2.88226	0				2009-11-13	9.82071	10.5932	0.609894	0				2009-11-13	10.4573	7.29034	-2.30264	0
2009-11-14	11.1044	0.183014	-4.51193	0				2009-11-14	10.1866	8.14954	-1.17862	0				2009-11-14	8.68695	9.75284	0.252594	0
2009-11-15	10.9823	4.21161	-5.02853	0				2009-11-15	5.88849	5.28293	-3.2504	0.690878				2009-11-15	4.73156	8.35147	0.9039	1.80002
2009-11-16	9.75	-0.454437	-5.3309	0				2009-11-16	9.52241	5.97891	-5.0842	0				2009-11-16	0.776177	3.41489	-2.77408	1.4025
2009-11-17	11.0767	1.73697	-5.70166	0				2009-11-17	9.13125	8.33844	-0.972717	0				2009-11-17	4.81749	1.43979	-5.37079	0.555005
2009-11-18	11.0249	2.1788	-5.55136	0				2009-11-18	9.24345	5.75845	-4.23914	0				2009-11-18	1.96845	1.26657	-6.61539	0.139536
2009-11-19	10.5819	6.44034	-3.33548	0				2009-11-19	10.5684	6.54172	-3.896	0				2009-11-19	9.2868	3.05475	-5.83835	0.00638285
2009-11-20	10.2676	7.54419	-2.47751	0				2009-11-20	9.99247	9.22345	-1.55978	0				2009-11-20	8.92411	4.68625	-4.3638	0.0297807
2009-11-21	9.74964	5.71506	-2.21277	0				2009-11-21	8.91718	8.49191	-0.144134	0				2009-11-21	8.29708	3.36456	-5.89148	0.0158826
2009-11-22	3.14217	4.30231	-2.78067	0.0750057				2009-11-22	8.32144	8.34775	-0.492035	0.0304024				2009-11-22	9.70401	1.56323	-10.6103	0
2009-11-23	10.1475	2.51724	-3.12155	0				2009-11-23	8.24303	7.96643	-1.74997	0.0073847				2009-11-23	10.2793	0.406342	-8.03641	0
2009-11-24	10.2077	4.68533	-3.28137	0				2009-11-24	9.19438	5.37134	-2.42963	0				2009-11-24	9.18181	1.85904	-6.72983	0.0204203
2009-11-25	10.0042	5.81613	-2.40863	0				2009-11-25	7.6825	7.78937	-1.09653	0				2009-11-25	6.2168	4.0491	-6.65097	0
2009-11-26	8.71023	2.88263	-3.43347	0				2009-11-26	6.18229	2.48068	-6.49136	0.0654128				2009-11-26	9.66461	1.44098	-8.46298	0
2009-11-27	10.1063	3.04089	-3.68362	0				2009-11-27	10.0586	0.968231	-7.61233	0				2009-11-27	9.45104	2.56186	-7.64526	0
2009-11-28	9.39529	4.02853	-3.64255	0				2009-11-28	9.14441	3.59061	-8.97977	0				2009-11-28	7.97689	0.832062	-8.05704	0.0168872
2009-11-29	8.62612	9.22519	-2.38687	0				2009-11-29	9.30421	-3.68243	-12.8065	0				2009-11-29	9.74635	0.456604	-8.81308	0
2009-11-30	9.00711	12.3377	-5.05472	1.87488				2009-11-30	8.57171	0.644898	-9.06717	0				2009-11-30	9.40004	0.486145	-9.96609	0
2009-12-01	3.4569	-6.61972	-11.302	0.0170115				2009-12-01	7.93254	2.74167	-6.24445	0				2009-12-01	7.5392	-0.524963	-10.058	0.00734162
2009-12-02	10.0363	1.76749	-11.38	0				2009-12-02	8.65713	0.413574	-7.46451	0				2009-12-02	5.373	1.48938	-6.92343	0
2009-12-03	9.25098	3.25937	-7.93381	0				2009-12-03	8.66802	0.194489	-8.97946	0				2009-12-03	8.92938	5.03155	-3.64279	0
2009-12-04	9.07526	0.752319	-6.75742	0				2009-12-04	8.92851	3.36859	-7.366	0				2009-12-04	9.00503	5.17804	-3.80008	0
2009-12-05	8.80122	3.54309	-8.49808	0				2009-12-05	7.48613	3.10272	-6.19299	0.179438				2009-12-05	6.51243	6.53854	-4.21808	0.00950782
2009-12-06	7.02577	2.44318	-8.81967	0				2009-12-06	1.99273	-0.0505981	-8.6156	0.329911				2009-12-06	1.62172	-2.07248	-10.2577	0.540071
2009-12-07	8.76914	1.60013	-9.27466	0				2009-12-07	8.78531	1.22244	-8.07993	0				2009-12-07	5.51824	-5.90546	-13.9146	0.0218608
2009-12-08	8.30954	-1.12628	-8.78744	0				2009-12-08	8.52812	3.17929	-5.78055	0				2009-12-08	6.71205	-4.68985	-15.4166	0
2009-12-09	7.85725	-3.08933	-10.1323	0				2009-12-09	8.87135	7.02567	-4.10053	0				2009-12-09	7.47188	4.79538	-3.50116	0.0363665
2009-12-10	8.73164	-0.231842	-9.55631	0				2009-12-10	8.90826	5.37842	-3.55417	0				2009-12-10	7.1886	0.941956	-11.8808	0.0825366
2009-12-11	8.34578	1.21793	-9.81836	0				2009-12-11	4.26812	3.20538	-6.4874	0.231475				2009-12-11	7.05395	-8.50845	-15.2187	0.0415451
2009-12-12	3.98943	2.55286	-6.36703	0				2009-12-12	2.99518	0.102051	-6.9743	0.53257				2009-12-12	8.96366	-2.29453	-14.546	0
2009-12-13	2.37493	-0.668091	-11.7189	0				2009-12-13	4.3971	-2.02921	-10.8468	0.254884				2009-12-13	9.17481	-1.12778	-10.9947	0
2009-12-14	9.50298	-5.00955	-12.8834	0				2009-12-14	6.05876	1.26367	-9.73587	0				2009-12-14	8.80406	-0.388977	-9.38913	0
2009-12-15	7.39776	-3.18735	-12.5676	0				2009-12-15	7.16995	3.47031	-6.94766	0				2009-12-15	8.92121	-1.56967	-9.45908	0
2009-12-16	8.16596	-1.9407	-12.1271	0.0393673				2009-12-16	7.92266	0.462311	-8.5589	0				2009-12-16	7.23882	1.005	-7.89835	0
2009-12-17	3.35107	-6.6438	-12.8381	0.315007				2009-12-17	5.0455	-2.62103	-12.483	0.315011				2009-12-17	6.00012	0.68399	-8.14945	0
2009-12-18	3.1696	-7.20969	-13.5871	0.0719175				2009-12-18	6.99398	-8.86487	-16.9629	0				2009-12-18	8.26044	3.29257	-6.51083	0
2009-12-19	8.85553	-7.75922	-14.9242	0				2009-12-19	9.02692	-6.55695	-16.7836	0				2009-12-19	8.2261	6.75455	-3.89203	0
2009-12-20	9.17679	-7.88785	-16.6708	0				2009-12-20	5.58293	-4.83212	-15.0006	0.0252577				2009-12-20	8.44852	3.45773	-4.85452	0
2009-12-21	8.7864	-7.88257	-17.1877	0				2009-12-21	7.81225	-8.40314	-17.2748	0				2009-12-21	8.7191	5.32224	-5.46454	0
2009-12-22	9.04476	-5.43426	-15.91	0				2009-12-22	9.26334	-9.51074	-19.1902	0				2009-12-22	8.59994	2.06122	-7.90588	0
2009-12-23	9.17959	-4.12109	-15.2674	0				2009-12-23	8.86605	-5.66348	-16.8569	0				2009-12-23	8.67693	1.99393	-8.66769	0
2009-12-24	7.98061	-6.57007	-15.6262	0				2009-12-24	1.52151	-7.18445	-14.5019	0				2009-12-24	8.06457	4.82993	-7.38571	0
2009-12-25	8.2645	-7.73132	-16.853	0				2009-12-25	6.37325	-2.27078	-12.7011	0				2009-12-25	6.63729	-1.40826	-10.6425	0
2009-12-26	7.52205	-5.29605	-16.1927	0				2009-12-26	6.88602	-6.57715	-14.9065	0				2009-12-26	5.37961	-3.53253	-11.9589	0
2009-12-27	8.97375	-0.990448	-14.8403	0				2009-12-27	8.50523	-6.24054	-17.1833	0.0123122				2009-12-27	4.07369	-4.38577	-12.5985	0
2009-12-28	9.06377	2.19739	-13.0788	0				2009-12-28	7.61842	-6.91446	-14.5495	0.013792				2009-12-28	8.63473	3.4791	-8.75503	0
2009-12-29	9.05169	2.83752	-11.2979	0				2009-12-29	7.3313	2.24942	-7.52133	0				2009-12-29	8.39821	4.13364	-7.59579	0
2009-12-30	7.61587	2.88162	-10.3134	0				2009-12-30	8.32445	7.65243	-6.91513	0				2009-12-30	8.23413	2.20706	-8.50986	0.180014
2009-12-31	8.63027	-0.896484	-10.6051	0				2009-12-31	7.89071	2.59457	-7.38068	0				2009-12-31	2.26061	-0.704468	-12.0555	0
2010-01-01	8.39679	1.56424	-11.7152	0				2010-01-01	8.71328	-1.77756	-10.7561	0				2010-01-01	9.01076	-0.625183	-12.0332	0
2010-01-02	6.9959	0.224609	-10.7621	0				2010-01-02	8.35609	3.67731	-7.6481	0				2010-01-02	8.9084	2.39661	-6.63464	0
2010-01-03	6.95842	-4.77835	-12.5769	0.00567301				2010-01-03	8.52214	6.23157	-6.38022	0				2010-01-03	5.60848	2.50076	-7.97696	0
2010-01-04	9.19221	-3.73868	-13.6547	0				2010-01-04	9.2722	7.35101	-6.46436	0				2010-01-04	8.81801	3.27228	-8.91885	0
2010-01-05	8.41098	-0.77005	-13.8242	0				2010-01-05	8.40526	2.9266	-7.33255	0				2010-01-05	8.4551	5.15488	-4.58844	0
2010-01-06	8.02487	-0.839874	-13.85	0				2010-01-06	8.30661	-1.11246	-9.01056	0				2010-01-06	3.42524	3.88486	-6.69348	0
2010-01-07	8.89802	-4.94324	-13.1764	0				2010-01-07	8.6064	4.81494	-7.86276	0				2010-01-07	6.61706	-0.635834	-9.28653	0
2010-01-08	2.44176	-4.03232	-13.5331	0				2010-01-08	8.93738	-4.68033	-14.1162	0				2010-01-08	0.664361	-3.11923	-11.103	0
2010-01-09	5.93641	-2.04846	-13.1897	0				2010-01-09	9.26835	-8.79834	-16.997	0				2010-01-09	6.07391	-1.53155	-12.4665	0
2010-01-10	7.49156	1.16971	-11.4139	0				2010-01-10	9.76968	-3.65649	-16.1596	0				2010-01-10	3.40765	-4.53659	-11.9935	0
2010-01-11	8.68313	-3.2146	-13.9884	0				2010-01-11	9.2882	-1.84094	-12.9671	0				2010-01-11	5.11497	-5.7811	-14.9457	0
2010-01-12	9.42826	-2.11954	-15.256	0				2010-01-12	9.34069	-2.15982	-12.7858	0				2010-01-12	9.14437	-5.08957	-15.7862	0
2010-01-13	9.2435	-1.98572	-15.5528	0				2010-01-13	0.515364	-1.58136	-12.9833	0				2010-01-13	6.16392	-4.91718	-15.3039	0
2010-01-14	8.59909	-0.698303	-13.1767	0				2010-01-14	8.59581	-2.40829	-11.3541	0				2010-01-14	6.42455	-3.98001	-14.8026	0
2010-01-15	9.59933	5.38391	-12.1904	0				2010-01-15	8.30409	-1.09256	-10.8377	0				2010-01-15	2.70646	-4.52072	-15.1104	0.13257
2010-01-16	8.77642	4.36102	-7.30746	0				2010-01-16	8.76309	-1.04706	-12.5811	0				2010-01-16	5.08412	-12.3429	-18.3321	0
2010-01-17	4.64604	-4.89783	-12.4766	0.0279362				2010-01-17	9.92967	-2.70444	-12.605	0				2010-01-17	9.63516	-3.47278	-16.1483	0
2010-01-18	10.0191	2.04443	-12.2651	0				2010-01-18	9.1634	-3.11978	-13.0935	0				2010-01-18	10.2874	0.550507	-14.9833	0
2010-01-19	9.15959	3.5737	-10.3105	0				2010-01-19	10.1282	-0.94223	-13.2565	0				2010-01-19	10.0324	0.41629	-10.5597	0
2010-01-20	9.75564	-6.79044	-16.364	0				2010-01-20	9.52445	1.67554	-7.84973	0				2010-01-20	9.90589	-0.35379	-10.8265	0
2010-01-21	10.1971	-4.83441	-17.5699	0.133666				2010-01-21	9.64974	-1.46051	-11.0421	0				2010-01-21	9.8812	2.55432	-9.54398	0
2010-01-22	9.22633	-6.64426	-17.6702	0				2010-01-22	9.0815	0.730865	-9.90201	0				2010-01-22	8.50717	2.97275	-9.40884	0
2010-01-23	10.5945	-16.1665	-23.1097	0				2010-01-23	10.0559	3.43945	-9.15616	0				2010-01-23	8.16692	3.65472	-7.95728	0
2010-01-24	11.9397	-8.28516	-23.7749	0				2010-01-24	6.52996	6.32556	-5.98471	0				2010-01-24	10.4855	3.759	-6.4621	0
2010-01-25	8.77643	-0.221375	-14.7745	0				2010-01-25	10.4439	3.11459	-8.5292	0				2010-01-25	10.6539	6.49503	-5.30276	0
2010-01-26	10.9646	4.36966	-11.7125	0				2010-01-26	10.9365	7.22061	-5.62161	0				2010-01-26	9.55721	5.59268	-11.2411	0
2010-01-27	9.96224	1.00363	-9.08603	0				2010-01-27	8.91177	8.43826	-4.25601	0				2010-01-27	6.21774	-10.5299	-18.8281	0
2010-01-28	8.51812	0.850616	-11.0425	0.494292				2010-01-28	6.74649	5.90732	-4.96057	0				2010-01-28	12.16	-10.4143	-19.6051	0
2010-01-29	9.60159	0.0431824	-10.2396	0				2010-01-29	7.82555	2.55112	-11.2208	0				2010-01-29	10.0361	-0.0556641	-12.9521	1.30504
2010-01-30	11.3897	2.00052	-12.049	0				2010-01-30	11.3008	-4.29163	-15.0306	0				2010-01-30	10.3668	1.77933	-10.5241	0
2010-01-31	11.5599	-1.90244	-11.3779	0				2010-01-31	11.1661	4.16418	-11.0788	0				2010-01-31	11.9106	7.00516	-5.00412	0
2010-02-01	11.3317	4.29394	-12.5908	0				2010-02-01	11.828	2.68893	-8.38522	0				2010-02-01	11.4752	6.12332	-4.83032	0
2010-02-02	6.94107	3.33524	-8.31906	0				2010-02-02	11.5353	3.79648	-6.12897	0				2010-02-02	11.359	7.92294	-7.50238	0
2010-02-03	10.5744	2.44034	-7.85681	0				2010-02-03	11.8944	4.97614	-5.1059	0				2010-02-03	9.66199	-0.989777	-10.4372	0
2010-02-04	12.0278	5.09311	-7.2276	0				2010-02-04	10.6117	6.13046	-6.47824	0				2010-02-04	9.09884	1.07617	-10.6023	0
2010-02-05	12.2395	6.5911	-5.28903	0				2010-02-05	12.1654	6.31039	-5.9639	0				2010-02-05	8.12402	9.63339	-4.57184	0.00946077
2010-02-06	9.25638	1.47287	-10.3286	0				2010-02-06	12.1474	9.76456	-0.240845	0.0820935				2010-02-06	7.41325	-0.871796	-9.66287	0.217869
2010-02-07	5.17969	-4.55478	-13.6707	0				2010-02-07	1.89112	2.47073	-7.04266	0.0186034				2010-02-07	9.18617	-2.24481	-12.3902	0
2010-02-08	12.1297	-1.71219	-15.2305	0				2010-02-08	11.1518	5.70422	-8.10245	0.0516371				2010-02-08	12.2222	0.529327	-13.0555	0
2010-02-09	10.7678	2.12302	-10.935	0				2010-02-09	6.2332	-3.56027	-12.1271	0.026268				2010-02-09	11.5131	-1.20813	-10.4891	0
2010-02-10	12.8573	5.3273	-8.61527	0				2010-02-10	13.3084	-0.236816	-13.2535	0				2010-02-10	12.5984	-0.863251	-11.9462	0
2010-02-11	13.0135	7.78009	-6.21506	0				2010-02-11	12.4272	7.02719	-8.3414	0				2010-02-11	13.1838	0.358246	-11.8721	0
2010-02-12	12.2428	9.92059	-3.98142	0				2010-02-12	11.2769	-0.205963	-8.3024	0.0133381				2010-02-12	13.313	3.05548	-11.8493	0
2010-02-13	13.383	9.61124	-2.38718	0				2010-02-13	13.9799	1.42172	-10.1053	0				2010-02-13	13.5393	6.29269	-6.0846	0
2010-02-14	13.1896	11.4969	-2.81381	0				2010-02-14	14.1272	4.76071	-8.36304	0				2010-02-14	13.9109	5.77045	-6.21716	0
2010-02-15	8.96936	8.84876	-3.04709	0.040466				2010-02-15	13.3974	7.51108	-4.36111	0				2010-02-15	13.7185	6.44693	-4.26621	0
2010-02-16	10.998	13.0449	-3.22751	0.033004				2010-02-16	12.1067	6.65799	-3.18173	0				2010-02-16	13.197	4.97574	-5.69928	0
2010-02-17	9.51342	11.8763	-1.64246	0.0316747				2010-02-17	5.46703	5.66196	-5.34003	0.0112655				2010-02-17	13.0875	10.4361	-1.7554	0
2010-02-18	11.5437	1.93002	-3.05704	0.397495				2010-02-18	12.3818	9.38757	-2.66794	0				2010-02-18	5.45177	6.01358	-2.87659	0
2010-02-19	13.5741	-0.352325	-4.34744	0.0666065				2010-02-19	11.7134	7.89169	-2.18118	0.00630609				2010-02-19	13.9123	14.3997	-0.957947	0
2010-02-20	15.6044	2.98538	-5.6152	0				2010-02-20	14.7967	12.9753	-1.43771	0				2010-02-20	6.70554	9.16431	-2.87961	0.00433427
2010-02-21	14.972	6.50449	-4.59766	0				2010-02-21	12.2252	8.79047	-2.08594	0				2010-02-21	11.0831	3.33176	-6.24536	0
2010-02-22	14.4039	7.24564	-2.79477	0				2010-02-22	13.2131	9.40915	-4.64462	0				2010-02-22	12.6559	8.21997	-3.91177	0
2010-02-23	12.9657	7.60468	-3.7948	0				2010-02-23	14.8543	6.77173	-4.42111	0				2010-02-23	12.5383	12.4029	-2.35013	0
2010-02-24	8.84028	2.63052	-3.53677	0.018254				2010-02-24	15.1282	7.76425	-2.81412	0				2010-02-24	2.80479	4.59051	-4.06708	0
2010-02-25	13.3723	6.39581	-4.4679	0				2010-02-25	10.8464	9.85922	-3.97394	0.0383568				2010-02-25	1.02526	0.523407	-7.28522	0.929844
2010-02-26	12.8235	8.47821	-3.03714	0				2010-02-26	14.7318	6.30173	-2.87292	0				2010-02-26	2.96042	0.452148	-9.19614	0.817474
2010-02-27	4.80822	2.08801	-3.8317	0.0800305				2010-02-27	12.9304	10.1773	-3.63559	0				2010-02-27	4.89558	1.53921	-9.40851	0.209002
2010-02-28	11.9175	7.27325	-3.57407	0.0867438				2010-02-28	12.9201	10.8778	-0.137787	0				2010-02-28	10.0134	1.35974	-7.18588	0.0250687
2010-03-01	14.9925	13.6242	-1.84634	0				2010-03-01	14.0535	12.2927	1.53024	0				2010-03-01	12.8126	3.78253	-7.60022	0.00275169
2010-03-02	15.6412	11.5855	-1.61041	0				2010-03-02	12.2559	8.68277	-1.36539	0				2010-03-02	17.336	4.13528	-7.91449	0
2010-03-03	11.1646	14.3301	1.29614	0				2010-03-03	12.4498	12.3106	0.217804	0.107524				2010-03-03	18.1227	5.41968	-5.81128	0
2010-03-04	6.71949	13.0162	1.93774	0.124077				2010-03-04	11.0924	14.3673	0.0851746	0.0559794				2010-03-04	17.4791	9.04392	-1.81888	0
2010-03-05	13.049	11.4987	-1.66815	0				2010-03-05	10.1852	13.1212	-2.48328	1.67285				2010-03-05	17.7393	13.8243	-1.15683	0
2010-03-06	18.4284	14.6075	-2.30313	0				2010-03-06	14.9472	4.11261	-7.72275	0				2010-03-06	18.3837	13.8432	1.97296	0
2010-03-07	16.8992	13.6058	-1.30542	0.087595				2010-03-07	16.5111	8.17987	-5.02911	0				2010-03-07	17.4072	16.189	2.75763	0
2010-03-08	6.30093	8.11484	-2.2977	0.232781				2010-03-08	13.7582	8.92111	-1.81451	0				2010-03-08	18.4323	13.0479	1.48361	0
2010-03-09	10.5024	6.84189	-2.86627	0.753964				2010-03-09	9.37808	6.99039	-5.22992	0				2010-03-09	6.12074	6.63321	-2.24506	0
2010-03-10	9.11469	9.40134	-0.443726	0.0339069				2010-03-10	18.8333	8.92548	-2.74249	0				2010-03-10	18.7349	12.3474	-0.251984	0
2010-03-11	18.0608	12.808	-1.01093	0				2010-03-11	18.1315	9.20551	-2.5769	0				2010-03-11	16.7196	12.9339	2.25064	0.0306044
2010-03-12	14.0645	15.1462	-0.599945	0.622649				2010-03-12	16.8428	8.96454	-4.24957	0				2010-03-12	12.1285	13.4913	0.805969	0.0512221
2010-03-13	6.65904	1.47131	-3.08737	0.944656				2010-03-13	12.6326	11.8186	0.283783	0				2010-03-13	18.6006	18.0652	5.08282	0
2010-03-14	19.1664	4.49927	-4.22101	0				2010-03-14	16.641	14.3099	1.78424	0				2010-03-14	18.6633	14.3103	-2.03555	0.0263932
2010-03-15	17.6927	10.1618	-1.909	0.0152577				2010-03-15	16.2211	15.2176	2.69464	0.44069				2010-03-15	20.6431	6.95795	-3.22946	0
2010-03-16	15.5751	10.1692	0.105743	0.192018				2010-03-16	8.14557	11.0013	1.22031	0.896824				2010-03-16	20.1897	15.2434	1.17929	0.0135221
2010-03-17	9.62844	12.5632	3.93356	0.0174106				2010-03-17	17.4448	15.7459	1.17136	0.134906				2010-03-17	20.0377	15.5998	3.44415	0
2010-03-18	14.3879	12.3164	2.85934	0				2010-03-18	6.13743	-1.5242	-7.73917	0.285138				2010-03-18	20.9156	21.5413	4.91721	0
2010-03-19	15.7828	17.1482	4.01389	0				2010-03-19	18.88	2.82944	-7.4935	0				2010-03-19	18.2182	17.9916	7.54236	0
2010-03-20	10.5636	11.0489	3.8624	0.772015				2010-03-20	19.2445	0.295441	-6.01083	0				2010-03-20	18.938	25.7763	12.2928	0
2010-03-21	14.267	11.0047	1.68491	0.0240783				2010-03-21	19.6676	10.9206	-3.55521	0				2010-03-21	10.0242	12.9222	2.26685	0
2010-03-22	6.59599	5.43832	-0.322784	0.0219566				2010-03-22	12.0224	9.96475	0.752869	0				2010-03-22	19.1283	7.75833	-2.68503	0
2010-03-23	20.1705	9.21564	-1.07144	0				2010-03-23	5.44759	7.78891	-1.91156	0.104864				2010-03-23	21.3053	7.88409	-2.48325	0
2010-03-24	11.5817	8.91684	-0.14975	0.252843				2010-03-24	13.7891	8.58966	-1.29617	0.150813				2010-03-24	22.7781	6.04413	-4.25021	0
2010-03-25	9.60886	8.18451	0.895904	0				2010-03-25	14.4374	10.4851	-1.21356	0.0659057				2010-03-25	22.0553	7.42392	-3.40726	0
2010-03-26	17.3925	11.8749	0.50119	0.0898144				2010-03-26	11.0605	8.80279	-0.823914	3.83206				2010-03-26	19.3801	7.00317	-3.51813	0.0552109
2010-03-27	19.0817	12.0575	0.720856	0.0131686				2010-03-27	8.4503	9.70493	-1.96237	0.860901				2010-03-27	10.5534	9.88217	1.5289	0.231542
2010-03-28	21.2924	14.289	0.621063	0.0724693				2010-03-28	12.3739	10.424	-0.128204	0.379316				2010-03-28	19.4265	25.2082	8.85379	0
2010-03-29	18.6189	16.3294	5.48016	0.0665733				2010-03-29	19.3286	12.6332	0.780426	0.0264628				2010-03-29	21.2941	26.1977	11.0849	0
2010-03-30	21.8546	18.8497	5.33108	0				2010-03-30	21.2462	15.2403	1.83508	0.0284242				2010-03-30	21.4763	29.877	12.0574	0.194758
2010-03-31	22.1359	22.5678	5.63547	0				2010-03-31	18.2068	18.8145	5.87479	0				2010-03-31	3.65207	6.84604	-2.2944	6.33001
2010-04-01	20.8716	21.4394	0.936493	22.7623				2010-04-01	16.5733	17.8853	4.85822	5.02368				2010-04-01	13.6376	5.8793	-3.70453	0.658262
2010-04-02	21.9027	6.93515	-2.01636	0				2010-04-02	19.441	12.5254	2.36636	0				2010-04-02	21.6742	11.5471	0.52713	0
2010-04-03	24.2888	6.25281	-2.08914	0				2010-04-03	13.174	13.3669	1.89465	1.16293				2010-04-03	13.3775	12.3421	1.94403	0.131029
2010-04-04	22.4889	12.5117	0.416809	0.0330778				2010-04-04	18.9324	16.924	4.26492	0.0700157				2010-04-04	22.8727	12.998	2.49912	0
2010-04-05	23.8326	14.0193	1.57547	0				2010-04-05	20.4759	17.2428	6.1629	0				2010-04-05	13.5679	10.986	1.30081	0.195291
2010-04-06	23.705	18.7611	2.37946	0.00632095				2010-04-06	20.6189	18.1713	7.02896	0.0168279				2010-04-06	14.0755	11.7256	2.19693	0.0402252
2010-04-07	13.9705	14.4845	1.70319	0				2010-04-07	9.75965	15.0618	6.32693	0.741456				2010-04-07	21.7914	16.0498	5.78467	0
2010-04-08	24.8553	8.41437	-1.67728	0				2010-04-08	5.79146	5.71753	-2.41568	0.598812				2010-04-08	23.2806	19.7219	8.51642	0
2010-04-09	20.8764	15.3372	0.376648	0				2010-04-09	23.1087	6.1597	-3.05328	0.0317025				2010-04-09	21.908	22.7507	10.1231	0.0165803
2010-04-10	21.8587	11.8351	3.11569	0				2010-04-10	23.9443	8.67746	-1.69202	0				2010-04-10	17.9377	11.8314	2.68601	0.0330812
2010-04-11	20.7679	14.2351	2.91083	0.0900637				2010-04-11	22.1192	10.08	0.197144	0				2010-04-11	22.2434	14.6938	3.72565	0
2010-04-12	18.7924	15.2546	3.06131	0.0850305				2010-04-12	24.4344	12.9816	2.33878	0				2010-04-12	24.8226	16.7436	-1.84717	0
2010-04-13	19.3145	13.7687	3.48862	0.190968				2010-04-13	24.2153	17.341	6.21329	0				2010-04-13	25.0245	10.9392	0.0223694	0
2010-04-14	23.1548	14.0161	1.47852	0.021664				2010-04-14	19.9464	23.033	9.86423	0				2010-04-14	23.7295	17.2651	3.87878	0
2010-04-15	25.181	15.1691	1.32638	0				2010-04-15	25.9462	19.5483	7.60205	0				2010-04-15	22.2185	23.5616	7.11517	0
2010-04-16	11.2717	14.8709	6.08481	6.0033				2010-04-16	25.7713	25.507	10.6377	0				2010-04-16	20.7944	23.2813	9.72827	0
2010-04-17	21.5654	16.2965	5.63413	1.43409				2010-04-17	25.6557	31.3397	16.2204	0				2010-04-17	19.4014	20.7705	7.27164	0.00750751
2010-04-18	24.6574	15.1604	6.00107	0				2010-04-18	20.3165	32.2458	17.7568	0				2010-04-18	15.9195	14.0028	5.16611	0.0274558
2010-04-19	22.928	12.2184	3.7811	0				2010-04-19	22.9122	29.3105	16.3916	0.0805064				2010-04-19	23.7982	17.9425	6.67828	0.0140591
2010-04-20	25.7639	17.4215	4.05493	0				2010-04-20	2.22683	24.0787	11.4675	2.06899				2010-04-20	8.50786	12.3263	5.41156	6.4128
2010-04-21	24.3476	24.149	9.09091	0				2010-04-21	19.4432	20.6469	9.85214	0				2010-04-21	14.9552	12.785	3.8118	0.143796
2010-04-22	18.2368	16.6453	3.44241	0.00500891				2010-04-22	11.8145	17.1545	8.38608	2.42047				2010-04-22	21.5002	20.9823	9.17255	0.154755
2010-04-23	27.4676	9.92319	-1.42322	0				2010-04-23	23.5142	15.4265	6.58026	0.0382571				2010-04-23	22.8015	24.6367	10.2921	0.274338
2010-04-24	24.3608	11.4919	0.300354	0				2010-04-24	25.3711	15.4773	5.21905	0				2010-04-24	6.83675	10.875	2.97256	1.25589
2010-04-25	20.1534	14.6669	4.4874	0.0911659				2010-04-25	22.5157	15.1287	4.56772	0				2010-04-25	23.8257	10.6637	2.76752	0.0189104
2010-04-26	25.8706	18.9304	6.98856	0				2010-04-26	20.6299	12.6207	3.79288	0				2010-04-26	18.531	14.2371	5.05487	0.161493
2010-04-27	24.1052	22.7851	11.4722	0.0405959				2010-04-27	23.4689	16.6782	5.66745	0				2010-04-27	16.6372	16.8918	7.08661	0.125707
2010-04-28	19.8242	20.4343	12.7428	2.57138				2010-04-28	25.8103	19.324	8.71753	0				2010-04-28	23.7016	21.2842	10.2052	0.0652738
2010-04-29	17.3294	19.2541	9.0365	0.106353				2010-04-29	25.2151	23.1894	11.6429	0.0496029				2010-04-29	24.6003	22.4894	6.40628	0
2010-04-30	23.2826	18.4792	8.0441	0.415938				2010-04-30	23.1454	24.5938	11.4519	0.373177				2010-04-30	20.7445	16.7077	7.32886	6.79462
2010-05-01	23.6509	15.807	3.47559	0				2010-05-01	26.9343	25.0074	12.2588	0				2010-05-01	11.3218	11.2768	3.88983	2.64648
2010-05-02	27.3246	14.4663	3.74362	0				2010-05-02	24.3407	32.6123	16.787	0.0849326				2010-05-02	21.9801	13.4589	4.29568	0.0515828
2010-05-03	27.9651	22.316	7.03973	0				2010-05-03	15.8008	22.7185	14.5869	0.242731				2010-05-03	25.9466	22.8617	11.0668	0.00120832
2010-05-04	27.0133	25.3086	11.5828	0				2010-05-04	13.0422	20.3636	8.3887	0				2010-05-04	27.399	23.9293	13.3298	0
2010-05-05	22.1615	23.0711	13.3981	0.278046				2010-05-05	18.944	18.0603	8.2608	0				2010-05-05	24.8467	24.4958	14.2019	0.082794
2010-05-06	19.3345	22.6993	10.3752	0.136343				2010-05-06	24.9012	21.9093	9.21551	0.711167				2010-05-06	26.1351	22.7386	7.69296	0
2010-05-07	28.3441	24.4952	11.3133	0				2010-05-07	27.4774	19.1014	9.88437	0				2010-05-07	27.3583	17.4528	8.78165	0
2010-05-08	27.5991	25.9058	14.4778	0				2010-05-08	16.1712	22.8465	13.8842	3.56738				2010-05-08	24.3728	20.0667	11.1245	0
2010-05-09	26.8305	30.0827	16.5852	0				2010-05-09	20.5063	25.2821	12.0445	2.12601				2010-05-09	19.8239	20.6875	10.8073	0.057471
2010-05-10	18.0842	23.7909	13.9361	1.20597				2010-05-10	17.853	22.1473	14.8943	0.230685				2010-05-10	25.5842	26.203	14.9359	0.210741
2010-05-11	0.0877695	12.9663	9.16714	6.32152				2010-05-11	9.79328	19.0872	11.1674	8.58722				2010-05-11	21.5254	23.502	15.2478	0.115786
2010-05-12	20.1457	14.5257	6.30112	0.0246844				2010-05-12	11.648	16.4722	8.11588	2.36005				2010-05-12	23.7538	24.2988	10.5092	0
2010-05-13	24.0672	15.8469	8.37323	0.0486794				2010-05-13	12.816	15.2424	7.90012	2.56048				2010-05-13	26.798	22.1543	12.2497	0
2010-05-14	28.7407	19.6851	9.72308	0				2010-05-14	24.4684	18.2795	8.27509	0				2010-05-14	27.1239	23.7343	13.9089	0
2010-05-15	26.8436	22.3606	13.0049	0				2010-05-15	25.565	20.0924	10.758	0				2010-05-15	27.2739	26.2409	14.4467	0
2010-05-16	17.3676	19.4922	12.0866	4.93698				2010-05-16	22.2522	20.3016	11.2877	0				2010-05-16	27.7301	27.5219	14.229	0
2010-05-17	26.7004	21.5326	12.7307	0				2010-05-17	27.9164	24.0434	13.4229	0				2010-05-17	25.2032	28.7821	16.379	0
2010-05-18	26.3642	25.0504	14.9479	0.0378245				2010-05-18	23.6547	24.8542	14.8662	0				2010-05-18	27.9319	28.1792	17.8416	0
2010-05-19	24.6905	28.9206	16.9129	0				2010-05-19	21.603	23.5614	11.1528	0.752575				2010-05-19	28.4284	31.716	16.447	0
2010-05-20	13.5431	24.7281	14.0726	0.608877				2010-05-20	23.575	19.4477	10.2191	0.808003				2010-05-20	27.6208	32.7785	18.3896	0
2010-05-21	11.7066	14.5916	6.72739	0.0900574				2010-05-21	28.6226	18.3294	10.7737	0				2010-05-21	27.1969	30.9148	19.2378	0
2010-05-22	19.3442	20.2998	9.89072	0				2010-05-22	28.2795	23.7264	13.4951	0				2010-05-22	25.1306	28.9394	16.2184	0
2010-05-23	16.2882	20.0541	13.5578	0				2010-05-23	27.443	29.0475	16.5696	0				2010-05-23	28.0573	26.8304	16.1351	0
2010-05-24	12.8256	22.5356	14.4923	0.205379				2010-05-24	26.9354	30.3587	16.9279	0				2010-05-24	27.8977	29.9518	19.1591	0
2010-05-25	18.3579	22.6065	16.0395	0.14722				2010-05-25	26.878	30.601	17.8853	0				2010-05-25	26.2113	29.3241	17.8788	0
2010-05-26	6.99248	20.6498	18.1611	4.62354				2010-05-26	24.8166	27.1964	17.8428	0				2010-05-26	10.1387	20.3091	13.0902	0.528987
2010-05-27	25.3121	28.6837	19.0699	0.365893				2010-05-27	22.4351	26.1017	13.4143	1.71923				2010-05-27	27.9764	25.3912	14.7934	0
2010-05-28	16.4194	20.9488	14.3178	0.646725				2010-05-28	15.0678	21.3682	12.6379	1.344				2010-05-28	19.0859	23.1731	14.9453	0.997804
2010-05-29	20.588	23.1135	12.1515	0.0770721				2010-05-29	27.635	23.8888	13.9821	0				2010-05-29	27.5311	26.9163	17.0014	0
2010-05-30	28.2838	25.5777	14.2702	0				2010-05-30	28.5148	26.1404	16.6198	0				2010-05-30	27.9581	28.8032	17.9621	0.0869701
2010-05-31	28.5342	29.8301	16.9173	0.0612716				2010-05-31	23.113	26.6656	16.3808	0				2010-05-31	14.5032	20.7751	14.8109	0.869568
2010-06-01	26.6085	28.8306	16.6811	0.0616696				2010-06-01	11.6872	24.143	16.2234	0.647917				2010-06-01	28.2379	25.8503	16.396	0.0598912
2010-06-02	25.9598	27.8398	17.3957	0				2010-06-02	23.8652	26.2598	16.7406	0.0990468				2010-06-02	20.3192	24.182	15.8742	4.84557
2010-06-03	27.5128	31.2879	19.388	0				2010-06-03	28.3874	30.1183	18.192	0.0970326				2010-06-03	9.24138	20.1411	14.6812	9.54908
2010-06-04	26.4032	32.3041	20.9216	0.13571				2010-06-04	28.9086	31.7751	19.4773	0.407737				2010-06-04	21.0225	22.915	15.5337	1.19361
2010-06-05	23.0051	29.6492	19.9311	0.951445				2010-06-05	24.0074	31.4916	18.9928	0.457875				2010-06-05	25.559	24.4112	14.769	0.101553
2010-06-06	24.2264	29.5248	20.8444	0.340244				2010-06-06	26.022	28.0555	18.7005	0.306143				2010-06-06	28.207	25.4393	15.9617	0.0210228
2010-06-07	7.64252	28.3124	19.5268	2.19772				2010-06-07	25.0702	28.3254	19.918	0				2010-06-07	25.9035	24.4094	16.2881	0.0425464
2010-06-08	22.2452	28.8365	15.0854	0.875392				2010-06-08	23.2093	26.7022	17.9072	0.113943				2010-06-08	18.6273	23.8968	16.3371	0.156096
2010-06-09	28.7932	21.5074	11.5782	0				2010-06-09	28.8998	28.4856	18.5682	0				2010-06-09	14.8312	22.6245	15.9595	4.62686
2010-06-10	28.9292	22.85	11.6804	0				2010-06-10	27.7998	31.0419	21.0327	0				2010-06-10	26.9254	25.976	16.0702	0.0267821
2010-06-11	28.3627	24.6371	13.4862	0				2010-06-11	26.4788	31.784	21.5067	0.0928731				2010-06-11	28.401	27.2498	18.5727	0
2010-06-12	29.329	26.436	14.815	0				2010-06-12	28.3158	31.0998	21.0795	0				2010-06-12	25.7326	29.7658	19.0753	0.179667
2010-06-13	26.5498	25.5155	16.6757	0				2010-06-13	29.7574	31.2568	20.8669	0.115906				2010-06-13	22.2041	26.9563	16.7982	0
2010-06-14	26.9189	26.9074	17.3613	0				2010-06-14	27.6545	31.2438	20.8381	0				2010-06-14	27.6401	25.3976	16.613	0
2010-06-15	26.6129	28.6029	18.4355	0				2010-06-15	18.4865	28.8864	17.2478	0.601606				2010-06-15	27.2497	28.03	19.4089	0.0658974
2010-06-16	26.4232	29.1153	19.9657	0				2010-06-16	6.52975	19.0986	12.3733	1.90687				2010-06-16	25.9999	34.4686	22.8475	1.99479
2010-06-17	16.4901	28.6927	19.0591	0				2010-06-17	16.5524	20.4675	12.3521	0.24996				2010-06-17	22.8006	31.7011	22.8436	2.21455
2010-06-18	20.5615	31.3947	18.1606	7.71984				2010-06-18	26.7711	27.0756	17.9282	0.0223609				2010-06-18	16.9562	28.0778	15.8038	15.1032
2010-06-19	23.81	23.2802	15.8836	0.690504				2010-06-19	25.2952	28.2171	18.9052	0.14964				2010-06-19	10.3863	19.8805	14.7695	5.5979
2010-06-20	27.0804	27.3038	16.4589	0.296614				2010-06-20	9.75093	25.2947	18.3635	0.562085				2010-06-20	3.50184	18.2216	13.4367	1.68839
2010-06-21	29.3059	26.6715	16.215	0				2010-06-21	24.6349	28.6888	18.9279	1.42294				2010-06-21	7.43936	16.5864	13.17	0.415108
2010-06-22	28.6408	29.0232	17.5745	0.023002				2010-06-22	7.89701	19.2104	15.2311	6.72217				2010-06-22	19.8337	21.7265	15.8945	0
2010-06-23	24.8853	29.8347	18.7429	0				2010-06-23	30.046	28.7907	17.8966	0				2010-06-23	26.9934	26.1659	16.5634	0
2010-06-24	27.6683	31.6806	20.8624	0				2010-06-24	26.6658	29.579	18.2178	0				2010-06-24	29.3031	26.9923	16.3655	0
2010-06-25	17.8111	28.8708	22.0261	7.01039				2010-06-25	27.5964	29.308	18.382	0				2010-06-25	29.0603	26.7515	17.3943	0
2010-06-26	16.9038	24.9018	18.5616	2.31587				2010-06-26	25.9424	29.3132	19.363	0				2010-06-26	28.5459	27.9948	18.1688	0.108114
2010-06-27	26.6393	30.0576	19.6768	0				2010-06-27	27.2544	29.3291	19.3356	0.00406128				2010-06-27	19.922	26.7163	19.0681	0.970866
2010-06-28	23.0523	30.2663	21.2819	0				2010-06-28	24.0796	25.0427	18.0798	1.50776				2010-06-28	23.3342	25.7025	17.0389	0
2010-06-29	22.1687	29.8575	20.7933	0				2010-06-29	25.67	24.4387	18.2349	4.41937				2010-06-29	26.9187	27.8866	17.2405	0
2010-06-30	22.9985	30.3466	21.6912	0.056767				2010-06-30	26.6569	26.2921	18.7434	0.38303				2010-06-30	23.707	25.8273	14.9348	0
2010-07-01	23.025	29.4738	20.6476	8.7463				2010-07-01	26.3078	26.7931	19.1928	2.80877				2010-07-01	28.3946	27.0581	18.8617	0
2010-07-02	24.2919	28.5963	21.3984	0.413019				2010-07-02	25.3708	27.6958	19.8126	0.73094				2010-07-02	27.3478	28.1076	18.2443	0
2010-07-03	24.1288	29.3296	22.0959	0				2010-07-03	27.239	29.3406	20.5991	0				2010-07-03	24.3945	27.8239	18.4875	0.920212
2010-07-04	13.2077	25.666	19.8229	0.0763338				2010-07-04	25.6725	30.9941	21.9115	0				2010-07-04	13.3269	23.1778	16.161	1.01106
2010-07-05	24.7481	30.8038	21.9253	0				2010-07-05	19.6232	30.891	19.1156	0.00328392				2010-07-05	20.4224	24.6744	16.5755	0.177872
2010-07-06	22.6632	34.564	22.8661	15.5364				2010-07-06	25.3724	24.0565	16.6894	0.203306				2010-07-06	27.6669	28.3117	17.003	0
2010-07-07	4.91104	21.6811	17.4858	3.78986				2010-07-07	27.1127	24.5779	17.0102	0.0533308				2010-07-07	26.9902	27.9362	18.0487	0
2010-07-08	27.9213	29.4901	19.6611	0				2010-07-08	27.1297	26.9654	18.0785	0				2010-07-08	23.9165	27.7143	18.3455	0.129951
2010-07-09	26.143	30.9496	20.9098	0				2010-07-09	27.0001	31.8402	21.0464	0				2010-07-09	27.476	28.8228	17.147	0
2010-07-10	25.0008	30.1083	21.5058	0.427786				2010-07-10	23.1367	32.1987	22.3972	0.0188191				2010-07-10	28.0258	28.9193	20.8285	0
2010-07-11	13.0434	23.7564	18.5986	0.24044				2010-07-11	3.81531	22.6864	18.0643	2.82391				2010-07-11	26.3287	30.703	21.2157	0.00281936
2010-07-12	27.7346	30.7715	19.5323	0				2010-07-12	24.4763	29.4536	20.4248	0				2010-07-12	26.483	31.2783	21.0131	0
2010-07-13	29.2198	30.9023	19.1148	0				2010-07-13	4.09887	24.2216	18.1325	13.7902				2010-07-13	13.8823	27.9722	20.773	0.258088
2010-07-14	24.9972	28.3081	19.6708	0				2010-07-14	1.70512	22.3093	16.5277	0.159955				2010-07-14	21.975	30.8857	20.9426	0
2010-07-15	23.9077	30.2942	22.0537	0.00529494				2010-07-15	11.0075	24.6501	17.3982	0				2010-07-15	25.0922	32.289	21.3218	0
2010-07-16	15.3625	25.8925	20.487	28.6555				2010-07-16	28.1458	29.4647	18.1138	0				2010-07-16	25.9018	33.0158	22.5117	0
2010-07-17	10.9885	20.0574	17.0004	16.042				2010-07-17	20.2412	30.3794	19.842	0.118447				2010-07-17	26.755	34.2527	22.3777	0
2010-07-18	24.1277	24.8955	17.4531	0.183399				2010-07-18	17.5357	26.1584	19.1941	0.0310264				2010-07-18	27.1564	33.6598	22.9445	0.436623
2010-07-19	28.0075	28.6938	19.5561	0				2010-07-19	27.6366	28.4571	19.6946	0				2010-07-19	20.9123	28.9549	21.5097	1.94752
2010-07-20	25.758	30.7873	21.416	0				2010-07-20	24.5837	27.2949	20.5371	0.163282				2010-07-20	17.1306	27.0997	19.276	0.423991
2010-07-21	18.1065	28.6603	21.273	3.39029				2010-07-21	22.7992	28.5286	20.9315	0.0614184				2010-07-21	22.3498	27.9865	21.8181	4.62123
2010-07-22	4.39161	21.7222	18.606	5.35589				2010-07-22	7.21157	28.8984	21.6354	2.30862				2010-07-22	2.9664	25.0751	18.8579	9.48721
2010-07-23	13.8586	24.1881	21.6335	5.62957				2010-07-23	16.4439	29.1193	21.4262	0.204558				2010-07-23	12.4964	26.297	19.1656	0.546406
2010-07-24	23.3186	28.7705	22.7057	2.21952				2010-07-24	24.4264	31.5732	21.9875	0.102746				2010-07-24	25.52	29.2638	21.2281	0.059675
2010-07-25	17.91	27.9265	22.4315	1.32239				2010-07-25	26.4539	32.8157	23.073	0.0508881				2010-07-25	15.251	26.8207	19.3921	0.90528
2010-07-26	4.15908	23.0618	18.2168	6.62691				2010-07-26	23.9424	33.4766	23.8641	0.0967997				2010-07-26	17.3329	28.346	21.416	11.669
2010-07-27	1.60934	19.283	14.906	8.27568				2010-07-27	6.74169	29.8986	21.4233	0.129965				2010-07-27	18.9947	29.716	22.7958	3.00269
2010-07-28	23.795	26.4031	18.2673	0				2010-07-28	20.4532	27.4544	19.2728	2.28749				2010-07-28	15.4664	27.5325	19.5191	0.207212
2010-07-29	25.4484	29.2788	20.9678	0.114876				2010-07-29	27.9351	29.6139	18.9379	0				2010-07-29	26.9302	28.8029	20.7508	0
2010-07-30	24.0838	28.5444	20.863	0.20299				2010-07-30	27.477	31.4915	21.1404	0				2010-07-30	27.7259	31.2067	16.4798	0
2010-07-31	21.9706	25.5449	19.4516	0				2010-07-31	26.8702	29.2152	19.3028	0.134696				2010-07-31	28.0936	30.832	19.9499	0
2010-08-01	12.5778	21.7194	19.3934	3.77099				2010-08-01	26.9191	29.8102	18.4904	0.740142				2010-08-01	27.3604	32.224	21.4592	0
2010-08-02	14.4125	21.7892	17.4244	2.35847				2010-08-02	26.5073	30.9086	20.4974	0.127219				2010-08-02	22.3999	30.9756	22.5408	0.392995
2010-08-03	21.0294	22.6844	16.7552	0.0685701				2010-08-03	21.679	27.4337	20.862	1.23076				2010-08-03	19.8784	31.4333	22.8896	1.05122
2010-08-04	21.0517	24.6394	17.2186	0.0504167				2010-08-04	22.0043	26.3925	19.6805	5.17995				2010-08-04	16.9794	29.3008	21.9229	0.467898
2010-08-05	13.0425	21.5618	16.732	0.51038				2010-08-05	20.6195	23.5955	18.1095	1.95925				2010-08-05	12.8458	27.9224	22.0567	4.70569
2010-08-06	17.4997	19.9356	16.1436	2.26747				2010-08-06	21.5933	24.3063	18.6916	2.65858				2010-08-06	14.3521	27.1785	20.1516	0.259481
2010-08-07	20.7594	23.4868	16.5586	1.0999				2010-08-07	21.4374	25.9302	18.8242	2.93211				2010-08-07	24.3101	29.3189	21.4519	0
2010-08-08	23.7854	26.378	17.8343	0.292874				2010-08-08	20.7088	28.7153	19.7383	0.0735757				2010-08-08	17.6953	27.4894	19.3135	0.538781
2010-08-09	20.5679	25.8091	18.4405	0.756276				2010-08-09	22.5613	29.3414	21.0372	0.642066				2010-08-09	19.6419	27.0513	18.4818	0.0486177
2010-08-10	17.0193	23.1958	17.3605	3.8819				2010-08-10	20.2464	28.4037	20.7945	1.42104				2010-08-10	26.2813	32.7338	19.5098	0
2010-08-11	21.5524	24.5665	17.5255	3.42261				2010-08-11	23.8407	30.1115	20.5792	0.666894				2010-08-11	26.1488	32.9493	19.2527	0
2010-08-12	21.0589	23.7179	18.0527	2.27526				2010-08-12	24.4547	33.5174	21.5893	0				2010-08-12	27.1594	33.578	19.7281	0
2010-08-13	23.226	26.7914	18.8343	0.0426921				2010-08-13	21.6504	34.0482	23.1633	0				2010-08-13	26.5359	32.8359	21.6805	0
2010-08-14	21.2751	25.4813	18.6193	1.60232				2010-08-14	24.033	36.8586	23.223	0				2010-08-14	24.9124	33.4767	22.4092	0
2010-08-15	14.0683	23.5155	17.7061	0				2010-08-15	24.5774	36.4175	23.3434	0				2010-08-15	20.5967	30.4077	20.6971	0.627616
2010-08-16	23.5776	26.1043	17.9433	0				2010-08-16	23.0057	35.4265	23.228	0.0941458				2010-08-16	21.0609	28.1653	19.9921	1.39821
2010-08-17	24.4108	27.4237	18.1595	0.126848				2010-08-17	21.5218	32.3269	22.2963	0.203655				2010-08-17	22.6972	27.8472	18.2172	0.385193
2010-08-18	23.1941	26.3357	16.6492	0				2010-08-18	21.4337	33.2312	20.6551	0				2010-08-18	23.4272	27.0712	18.0035	0.397164
2010-08-19	23.6644	26.0372	17.2261	0				2010-08-19	25.1763	34.6509	22.1044	0				2010-08-19	22.6851	26.0626	18.4923	0.0358624
2010-08-20	21.1676	24.7243	17.7027	0				2010-08-20	24.1811	33.8629	22.9901	0				2010-08-20	18.6715	26.0033	17.0021	0.300949
2010-08-21	20.9672	25.2372	17.0885	0				2010-08-21	25.3375	34.4685	22.846	0				2010-08-21	24.5348	26.8233	16.2906	0.953137
2010-08-22	18.6244	25.6008	17.5346	0.162739				2010-08-22	23.9245	36.6446	21.4989	0				2010-08-22	24.8563	26.7806	15.7954	0
2010-08-23	10.4832	23.3157	18.0809	3.62189				2010-08-23	23.2693	35.8943	21.837	0.773744				2010-08-23	24.1129	25.8553	17.7776	0.681681
2010-08-24	9.83877	19.4641	17.4387	0.535914				2010-08-24	20.2291	29.9656	15.9066	24.5317				2010-08-24	13.6949	23.7144	16.3286	0.384605
2010-08-25	20.6252	24.9658	17.1764	3.61327				2010-08-25	3.80791	15.1886	11.0046	14.676				2010-08-25	19.9388	29.3313	16.3176	0.08722
2010-08-26	23.7173	28.4928	17.6597	0				2010-08-26	10.1822	14.6671	10.2803	2.46429				2010-08-26	24.3527	25.8792	14.2688	0
2010-08-27	20.9967	30.0706	18.6486	1.59986				2010-08-27	9.51191	14.3744	11.0806	0.754462				2010-08-27	24.344	26.2799	16.3746	0
2010-08-28	18.4171	23.7426	14.0653	0.14443				2010-08-28	23.2111	23.3136	13.8564	0				2010-08-28	22.2862	27.3575	17.1806	0.0997849
2010-08-29	19.8585	22.2719	13.5733	0				2010-08-29	20.8698	26.8393	16.3766	0				2010-08-29	23.2277	29.9084	18.3409	0
2010-08-30	21.6874	23.5913	14.6572	0				2010-08-30	13.8465	27.4501	16.9535	2.41138				2010-08-30	21.8529	31.5844	20.1994	0
2010-08-31	21.8604	24.6307	14.8414	0.124958				2010-08-31	9.8759	18.8894	12.8048	2.72057				2010-08-31	22.264	31.8147	19.619	0.0791086
2010-09-01	22.0944	26.0472	15.5771	0.0651565				2010-09-01	19.7594	19.766	11.4159	0.569593				2010-09-01	22.3887	28.3202	14.0914	0
2010-09-02	19.965	25.3597	15.8197	1.39966				2010-09-02	14.6959	21.2553	13.7078	0.923752				2010-09-02	18.1977	24.0304	15.1991	0.455965
2010-09-03	21.4759	26.1869	15.6954	0.0406886				2010-09-03	11.1107	19.4	13.0401	1.57037				2010-09-03	8.86422	21.1071	14.4834	0.427996
2010-09-04	20.6165	27.3001	16.3717	0.593158				2010-09-04	11.8245	21.0075	11.9633	0				2010-09-04	13.7035	24.6473	15.4516	0.337288
2010-09-05	10.3095	23.0234	14.3951	0.373463				2010-09-05	16.7189	23.6345	14.3452	0.079366				2010-09-05	12.0721	23.5506	15.1009	4.03183
2010-09-06	20.2885	25.3534	14.467	0.639259				2010-09-06	21.9338	23.5449	13.2215	0				2010-09-06	7.29828	17.807	11.9995	10.5453
2010-09-07	19.3355	24.3491	14.1024	0.678281				2010-09-07	21.0879	17.5354	11.63	0.464265				2010-09-07	11.9582	13.6028	9.37692	0.481159
2010-09-08	21.4533	24.2988	13.9064	0				2010-09-08	20.7146	17.9745	10.2148	0.0486041				2010-09-08	18.3048	16.5028	7.64029	0
2010-09-09	20.6008	25.9044	14.9459	0				2010-09-09	12.3249	19.5334	11.8542	2.95104				2010-09-09	21.8875	21.1908	11.8491	0.086943
2010-09-10	13.3047	23.5434	15.102	0.00476739				2010-09-10	14.6384	21.2983	12.4659	0.30428				2010-09-10	20.6927	23.7015	12.7638	0.936171
2010-09-11	11.224	21.6251	11.4472	3.85583				2010-09-11	9.98129	19.7023	11.4966	0.06587				2010-09-11	16.7197	20.9227	12.2572	0.0933964
2010-09-12	21.7832	19.0098	11.05	0				2010-09-12	21.4774	20.2543	8.78622	0				2010-09-12	15.0024	19.1455	11.2458	0.0314224
2010-09-13	19.7901	24.9515	12.1075	0				2010-09-13	19.7017	17.7395	9.84756	0.0214377				2010-09-13	6.78823	15.8832	9.65976	0.219724
2010-09-14	17.5936	25.0156	14.435	0.0728892				2010-09-14	19.9059	22.6224	11.8174	0				2010-09-14	19.094	23.642	12.0979	0.109817
2010-09-15	8.48146	18.6444	14.6601	1.23566				2010-09-15	19.8479	22.6263	11.2202	0.0611178				2010-09-15	20.4764	23.3514	9.7634	0
2010-09-16	2.06715	17.6187	13.6686	1.5537				2010-09-16	19.8483	22.655	13.0549	0				2010-09-16	20.958	25.3426	12.2427	0
2010-09-17	12.6515	19.8588	11.6955	1.41555				2010-09-17	18.4454	25.5059	15.621	0.360625				2010-09-17	20.6294	25.4018	13.3038	0
2010-09-18	12.2587	20.0426	11.7562	0.0945291				2010-09-18	18.9459	25.9301	15.117	0.869995				2010-09-18	14.3399	22.16	13.4101	8.60413
2010-09-19	18.9818	23.8462	13.6081	0.167458				2010-09-19	10.8674	26.1382	13.9124	5.34473				2010-09-19	19.8383	20.2956	9.39786	0
2010-09-20	19.318	25.6862	13.3918	0.169215				2010-09-20	12.3745	22.6928	12.8602	0.312231				2010-09-20	20.6571	18.3823	8.26743	0
2010-09-21	19.1666	26.4127	13.0184	0.0311177				2010-09-21	10.9013	19.2778	9.66626	0.0719498				2010-09-21	20.323	21.225	10.2852	0
2010-09-22	16.8689	25.1072	13.1761	0.175128				2010-09-22	6.92681	17.0732	9.6218	1.99205				2010-09-22	19.5511	25.0286	10.0477	0
2010-09-23	17.7097	19.8738	11.0135	0				2010-09-23	12.2382	19.1344	9.25549	0.116337				2010-09-23	17.2234	23.7432	10.7874	0.275452
2010-09-24	19.0493	25.0038	10.8209	0.320153				2010-09-24	10.2415	17.954	9.44626	0.284394				2010-09-24	19.2995	21.5732	8.44192	0.0687968
2010-09-25	7.85613	16.9359	6.4942	0.0471027				2010-09-25	18.7201	13.4896	4.47247	0				2010-09-25	17.4366	22.5144	10.9693	0.180283
2010-09-26	20.0803	14.574	4.33478	0				2010-09-26	18.7888	17.5083	5.22806	0				2010-09-26	14.7953	22.8884	11.755	0.445479
2010-09-27	18.5564	16.7653	3.05566	0				2010-09-27	19.3575	18.3406	7.50925	0				2010-09-27	16.633	27.3789	13.4143	0.039451
2010-09-28	17.8606	20.3744	6.81787	0				2010-09-28	18.1513	23.7023	10.9914	0				2010-09-28	13.6628	25.3132	13.1911	0.530724
2010-09-29	12.0733	20.533	9.27304	0.0670676				2010-09-29	15.6931	23.7226	12.6238	0.143101				2010-09-29	11.9539	21.2456	10.4286	0.0775918
2010-09-30	14.9238	15.6133	3.12674	0				2010-09-30	15.1722	26.1235	10.7257	3.27				2010-09-30	8.88584	18.7958	10.1438	0.0818727
2010-10-01	19.0085	20.2006	2.74051	0				2010-10-01	8.20685	14.4753	4.7135	0.359145				2010-10-01	17.713	25.2903	11.9465	0.0242688
2010-10-02	17.887	25.6282	6.85736	0				2010-10-02	13.3747	17.4174	6.35104	0				2010-10-02	11.5988	21.5925	8.38559	0.173642
2010-10-03	16.0851	19.4693	9.97528	0.564466				2010-10-03	8.95392	16.6343	6.71979	0.820228				2010-10-03	11.2726	20.6088	9.36527	0.440939
2010-10-04	14.0788	18.748	9.98804	0.248429				2010-10-04	9.00218	15.705	5.46869	0.414265				2010-10-04	9.8114	18.5806	4.3085	0.383318
2010-10-05	12.9647	17.113	3.67273	0				2010-10-05	9.86161	15.8077	4.68005	0.206813				2010-10-05	17.713	18.0272	4.47846	0
2010-10-06	17.7327	16.1614	2.54874	0				2010-10-06	9.71804	16.3336	3.06119	0.293539				2010-10-06	15.6788	18.6692	6.41418	0.0166258
2010-10-07	17.2	21.6304	2.70242	0.00776529				2010-10-07	15.9806	17.9163	5.90692	0.454359				2010-10-07	10.0318	14.7803	4.27151	0.199567
2010-10-08	17.019	16.4132	4.43997	0				2010-10-08	11.6346	19.0718	6.04889	0.531395				2010-10-08	15.4766	20.6053	5.89349	0.0316953
2010-10-09	16.7341	23.2176	4.83704	0.764642				2010-10-09	15.6025	22.0509	8.94251	0				2010-10-09	8.89041	14.3176	5.5726	5.31644
2010-10-10	16.4194	12.5576	4.15115	0.849391				2010-10-10	12.5709	19.6717	9.37387	0				2010-10-10	5.84361	14.6267	2.91238	0.0274177
2010-10-11	16.1046	13.5779	3.87701	0				2010-10-11	11.4824	18.2492	7.64499	0				2010-10-11	15.2498	14.684	3.58188	0.0413936
2010-10-12	16.3576	19.7338	5.09512	0				2010-10-12	14.5091	13.5837	3.38303	0				2010-10-12	13.5161	14.6265	4.96042	0.0621908
2010-10-13	16.4215	19.2326	4.19034	0				2010-10-13	14.8695	9.94421	0.514069	0				2010-10-13	15.4519	20.1242	3.92203	0.0413241
2010-10-14	9.22596	17.7514	4.66031	0.0826823				2010-10-14	13.4095	16.5081	2.86682	0.470645				2010-10-14	16.2143	21.8524	3.16797	0
2010-10-15	11.8787	16.8073	4.52954	0.00887561				2010-10-15	9.039	15.9175	5.51297	0.36433				2010-10-15	16.136	23.2398	9.80951	0
2010-10-16	15.2553	18.7455	3.73709	0				2010-10-16	12.943	14.6985	4.0697	0				2010-10-16	11.1314	23.6499	6.93063	0.027116
2010-10-17	15.2924	20.3177	4.82449	0				2010-10-17	14.5019	14.3011	3.57434	0				2010-10-17	15.9089	19.0156	4.04898	0
2010-10-18	14.9557	19.8754	5.51386	0				2010-10-18	14.4131	14.7675	4.36673	0				2010-10-18	14.1123	19.2701	4.6716	0
2010-10-19	14.6398	22.445	8.0824	0				2010-10-19	15.6158	12.9232	2.14279	0				2010-10-19	15.0266	21.105	7.07944	0
2010-10-20	13.8063	24.9813	9.17905	0				2010-10-20	14.6871	11.7279	0.108581	0				2010-10-20	13.9007	19.4698	4.54205	0
2010-10-21	10.391	11.9588	2.83984	0.361216				2010-10-21	14.8698	9.80707	0.20697	0				2010-10-21	14.4392	23.6802	7.78885	0.0449247
2010-10-22	14.9653	11.1055	0.358185	0				2010-10-22	14.4734	12.9618	0.746948	0				2010-10-22	6.04488	17.0258	7.3024	0
2010-10-23	14.5983	14.9945	-0.777252	0.0386934				2010-10-23	14.7152	15.7959	3.65692	0				2010-10-23	3.95972	13.3359	4.89981	1.80545
2010-10-24	13.9791	18.8405	1.99374	0.148468				2010-10-24	13.9671	16.3507	3.45999	0				2010-10-24	12.5779	17.8697	3.73373	0.0112686
2010-10-25	7.92188	12.1659	4.00116	1.87632				2010-10-25	13.923	16.4657	3.96756	0				2010-10-25	10.3237	17.8434	0.907104	0
2010-10-26	12.5158	18.1543	3.85483	0.258162				2010-10-26	12.9675	15.7642	4.49484	0				2010-10-26	14.3861	14.2637	3.1347	0
2010-10-27	11.8651	13.2894	0.996368	0.0836306				2010-10-27	10.4011	17.2893	5.37811	0.0302155				2010-10-27	11.46	15.2659	-1.21933	0
2010-10-28	10.1012	11.3393	0.162567	0.0370778				2010-10-28	12.6777	18.4615	5.46631	0.12462				2010-10-28	14.0041	11.6129	-0.979004	0
2010-10-29	11.0576	22.0309	2.16126	0.453898				2010-10-29	10.6226	12.7734	1.89267	0.0672661				2010-10-29	13.4976	21.4546	3.17355	0.0218004
2010-10-30	10.675	7.3782	-0.809479	0.0536902				2010-10-30	13.0163	7.67438	-2.95892	0.169829				2010-10-30	13.0404	17.4631	1.79938	0.248802
2010-10-31	8.91707	5.09229	-4.98416	0				2010-10-31	11.2902	10.4417	1.02261	0				2010-10-31	10.3729	7.4736	-2.24796	0.0299453
2010-11-01	12.8102	1.0878	-6.18552	0				2010-11-01	13.0925	11.1893	-0.140747	0				2010-11-01	12.9865	17.2843	2.3165	0
2010-11-02	13.1024	6.83334	-6.68192	0				2010-11-02	12.9571	12.9316	-0.0985413	0				2010-11-02	12.8261	21.3832	5.6922	0
2010-11-03	13.324	9.79971	-3.72736	0.00863455				2010-11-03	11.8169	14.4018	0.127655	0				2010-11-03	8.40856	10.1037	-4.03372	0.150509
2010-11-04	12.5197	11.9826	-1.27283	0				2010-11-04	11.1455	15.2947	2.61758	0				2010-11-04	12.7042	9.22455	-4.65301	0
2010-11-05	11.72	14.203	-1.60596	0.0274006				2010-11-05	10.3888	12.2328	1.138	0.19194				2010-11-05	12.3098	17.6667	2.45779	0.0383406
2010-11-06	2.36216	11.9742	-0.0185547	3.28524				2010-11-06	10.6656	7.28568	-1.97025	0.0769512				2010-11-06	4.17192	5.04675	-4.50836	0
2010-11-07	10.204	13.9674	-0.982178	0				2010-11-07	11.3795	3.13178	-3.7121	0.0274173				2010-11-07	11.9062	-0.864868	-6.3121	0
2010-11-08	10.6738	18.7707	1.78253	0.405447				2010-11-08	11.9483	8.92606	-0.749237	0				2010-11-08	11.9437	10.2645	-0.544434	0
2010-11-09	11.1943	5.46323	-3.48575	0				2010-11-09	11.1969	4.49219	-2.77258	0				2010-11-09	12.11	12.3783	0.464874	0
2010-11-10	12.0574	3.47732	-3.63809	0				2010-11-10	9.78901	8.9299	-1.45483	0				2010-11-10	11.3975	13.1097	0.68924	0
2010-11-11	11.0355	7.11984	-1.66394	0				2010-11-11	4.85772	5.92819	-2.58353	0				2010-11-11	11.7143	11.4795	0.189178	0
2010-11-12	11.0623	7.12024	-2.27072	0				2010-11-12	6.46988	6.0394	-2.96265	0				2010-11-12	11.3691	15.7182	0.544067	0
2010-11-13	10.5421	10.0176	-1.15237	0				2010-11-13	11.0591	7.22138	-2.61716	0				2010-11-13	10.7567	12.3129	-0.121704	0
2010-11-14	8.66462	13.2795	-0.948151	0				2010-11-14	11.445	9.79294	-1.38513	0				2010-11-14	10.7091	11.7484	-0.0603332	0
2010-11-15	3.82313	6.16852	-2.27603	1.80017				2010-11-15	10.3458	8.92612	-0.448059	0				2010-11-15	10.2007	12.5698	0.793884	0
2010-11-16	8.02229	1.99326	-3.76767	0				2010-11-16	10.5097	9.64783	-0.0190125	0				2010-11-16	9.05052	9.71307	0.0316467	0
2010-11-17	11.1855	0.812622	-5.26321	0				2010-11-17	7.03947	8.89536	-0.198944	0				2010-11-17	7.56751	9.76025	-0.775299	0
2010-11-18	10.0952	4.16577	-7.1365	0				2010-11-18	7.11702	9.27368	0.556671	0				2010-11-18	6.2221	7.35049	-2.72208	0
2010-11-19	10.4821	4.17914	-2.55148	0				2010-11-19	9.95812	9.07175	-0.446777	0				2010-11-19	8.84929	3.68402	-6.12302	0
2010-11-20	9.91869	4.17096	-3.00375	0				2010-11-20	9.71945	10.2743	-0.867035	0				2010-11-20	8.48803	0.626312	-7.23434	0
2010-11-21	10.2309	8.06497	-4.28449	0				2010-11-21	5.83855	7.53619	-1.23868	0.0511989				2010-11-21	10.1375	3.95035	-6.13971	0
2010-11-22	10.5628	0.97934	-5.68326	0				2010-11-22	5.15795	5.21646	-3.19803	0.0238757				2010-11-22	7.62239	1.01093	-5.77536	0.0274668
2010-11-23	9.9385	2.20956	-5.70273	0.241307				2010-11-23	9.63368	2.71726	-4.89975	0				2010-11-23	5.44435	-0.874603	-8.5878	0.0857968
2010-11-24	9.35655	1.93695	-4.40204	0				2010-11-24	10.2414	5.22937	-4.34494	0				2010-11-24	6.59296	-2.29748	-9.40988	0.0165801
2010-11-25	9.74943	4.58701	-4.11664	0				2010-11-25	6.13815	4.14783	-3.33035	0.00984039				2010-11-25	9.76657	-1.6586	-11.463	0
2010-11-26	9.03709	3.48126	-2.52405	0				2010-11-26	9.05326	0.675232	-6.94308	0				2010-11-26	9.84459	-2.29349	-11.7184	0
2010-11-27	9.49517	4.49146	-2.85147	0				2010-11-27	8.36379	3.97067	-4.5737	0.293457				2010-11-27	9.92497	-0.185577	-10.4261	0
2010-11-28	9.19387	6.50305	-3.60715	0				2010-11-28	8.88597	-1.26135	-7.9801	0.0110084				2010-11-28	9.49577	3.98587	-7.46396	0
2010-11-29	9.04479	7.4382	-2.43759	0				2010-11-29	8.05742	1.00561	-8.71188	0				2010-11-29	9.4206	5.52301	-5.09244	0
2010-11-30	9.0311	6.87332	-3.2139	0.0191258				2010-11-30	9.1778	4.65839	-4.47891	0				2010-11-30	8.57905	2.91776	-5.38541	0
2010-12-01	8.58296	3.45987	-3.7475	0				2010-12-01	8.8674	1.38504	-5.51163	0				2010-12-01	9.3579	0.829102	-7.68234	0
2010-12-02	4.5124	5.73349	-2.84012	0				2010-12-02	7.96603	-0.386352	-7.38962	0				2010-12-02	9.33414	4.70578	-7.31345	0
2010-12-03	8.95365	3.45203	-2.83212	0				2010-12-03	6.93245	-3.07159	-9.32315	0				2010-12-03	8.98859	2.034	-6.4967	0
2010-12-04	8.37002	6.88608	-3.15097	0				2010-12-04	6.03082	-0.192474	-10.633	0				2010-12-04	9.06985	3.91461	-6.15219	0
2010-12-05	8.5408	11.1608	-3.04398	0				2010-12-05	8.21898	4.83337	-7.43597	0				2010-12-05	8.90816	5.05533	-5.38947	0
2010-12-06	7.4676	9.72449	-2.46301	0				2010-12-06	8.31172	4.01889	-3.62814	0				2010-12-06	4.75751	-0.678955	-7.78946	0
2010-12-07	8.30151	11.1641	-2.74426	0				2010-12-07	6.38123	5.59296	-5.99957	0				2010-12-07	7.7486	-3.94461	-11.8207	0
2010-12-08	8.42071	11.4023	-2.7728	0				2010-12-08	8.41296	3.97095	-5.03271	0				2010-12-08	8.68917	0.636139	-10.2437	0
2010-12-09	8.32503	11.6082	-2.81653	0				2010-12-09	8.77738	5.2883	-4.89209	0				2010-12-09	8.18189	4.04361	-9.03024	0
2010-12-10	8.51059	7.59988	-4.74609	0				2010-12-10	8.9579	4.35889	-6.14941	0				2010-12-10	7.63297	1.64481	-10.917	0
2010-12-11	7.83671	7.72903	-5.79782	0.0485358				2010-12-11	8.25251	4.00357	-6.5567	0				2010-12-11	8.7815	-0.375305	-11.4821	0
2010-12-12	1.10739	1.32938	-4.77713	2.01001				2010-12-12	7.62995	0.911957	-8.27188	0				2010-12-12	8.66216	-0.236725	-10.8315	0
2010-12-13	8.1617	4.24322	-5.38425	0				2010-12-13	7.1497	1.85452	-8.00491	0.00773203				2010-12-13	8.95134	-1.07687	-11.2559	0
2010-12-14	8.42736	6.75629	-5.84647	0				2010-12-14	7.16423	2.20962	-7.97531	0				2010-12-14	8.64329	-3.59	-13.3441	0
2010-12-15	7.53622	5.3443	-4.75845	0				2010-12-15	5.68414	3.13614	-4.96344	0				2010-12-15	9.10436	-6.18118	-14.2183	0
2010-12-16	3.49267	0.0290222	-7.79193	0.164691				2010-12-16	1.10902	0.336182	-9.14023	0				2010-12-16	8.36173	-2.24478	-13.9506	0
2010-12-17	6.35023	-2.12085	-9.12283	0				2010-12-17	8.79123	-4.37476	-11.6009	0				2010-12-17	7.19443	1.85306	-9.84158	0
2010-12-18	8.14072	2.69369	-8.41647	0				2010-12-18	8.9426	0.452454	-11.5761	0				2010-12-18	7.24177	1.75439	-10.1276	0
2010-12-19	7.99225	2.77765	-4.37405	0				2010-12-19	8.4158	2.76331	-7.97293	0				2010-12-19	5.99358	-4.76834	-13.0477	0.0218645
2010-12-20	8.35187	2.60159	-4.04605	0				2010-12-20	7.6098	4.61038	-7.11136	0				2010-12-20	2.85392	-3.56174	-13.1066	0.0661738
2010-12-21	8.55518	5.00836	-4.39584	0				2010-12-21	5.89712	4.34445	-4.42029	0				2010-12-21	8.11649	4.40826	-8.51987	0
2010-12-22	8.05978	6.62329	-5.21567	0				2010-12-22	6.97138	4.89719	-6.81067	0				2010-12-22	4.55166	-4.11319	-12.1924	0
2010-12-23	5.90254	4.03113	-4.32095	0				2010-12-23	2.54842	3.51874	-5.64258	0				2010-12-23	5.50481	1.44833	-11.6795	0
2010-12-24	3.17501	-3.41339	-9.4957	0				2010-12-24	4.76503	-0.996704	-8.59164	0				2010-12-24	8.21713	4.8121	-5.75143	0
2010-12-25	0.447473	-5.75793	-11.7681	0				2010-12-25	6.98164	-2.71655	-10.0474	0				2010-12-25	5.22105	4.67072	-9.81339	0
2010-12-26	8.29822	-1.61792	-12.2991	0				2010-12-26	8.88085	0.254639	-10.5785	0				2010-12-26	8.3761	-1.39807	-11.8448	0
2010-12-27	8.91732	2.25705	-10.4266	0				2010-12-27	8.96257	1.89136	-8.13364	0				2010-12-27	8.83055	-3.88474	-15.2323	0
2010-12-28	7.97361	-8.547	-14.5876	0				2010-12-28	8.90605	2.99985	-8.33862	0				2010-12-28	8.78703	-3.90964	-16.1135	0
2010-12-29	6.81619	-5.60431	-14.7238	0				2010-12-29	8.42013	2.68814	-9.63767	0				2010-12-29	8.76425	-7.93347	-18.2673	0
2010-12-30	5.8352	-4.44864	-12.9571	0				2010-12-30	9.16803	2.7099	-9.68012	0				2010-12-30	9.12141	-4.54599	-16.5502	0
2010-12-31	9.2218	-3.93866	-13.877	0				2010-12-31	2.53752	3.76318	-6.37909	0				2010-12-31	9.06728	-1.96796	-13.8879	0
2011-01-01	8.09572	0.261017	-11.2221	0				2011-01-01	8.88437	5.08484	-5.14432	0				2011-01-01	8.79577	-1.04446	-14.8053	0
2011-01-02	7.12833	2.63178	-9.30313	0				2011-01-02	7.3542	4.04352	-6.76556	0				2011-01-02	8.38393	-3.53763	-15.0745	0
2011-01-03	8.27868	-4.61417	-13.7381	0.00884788				2011-01-03	7.41698	-4.98386	-12.6958	0				2011-01-03	5.308	-2.2839	-12.2791	0.0194182
2011-01-04	3.24061	-9.63257	-15.2436	0				2011-01-04	8.88189	0.177704	-12.0033	0				2011-01-04	6.83794	-2.90268	-12.3598	0.0196906
2011-01-05	8.36522	-7.13684	-16.6649	0				2011-01-05	7.9286	2.0925	-6.58411	0				2011-01-05	1.19848	-3.40927	-12.6896	0.465023
2011-01-06	7.90166	-4.33264	-15.8734	0				2011-01-06	5.40062	3.10397	-5.2153	0				2011-01-06	2.3099	-9.18167	-17.9971	0.0187162
2011-01-07	9.34111	1.72858	-13.6386	0				2011-01-07	7.81899	3.06836	-5.9892	0				2011-01-07	2.58729	-13.1984	-21.4972	0
2011-01-08	6.96695	-0.480316	-10.5988	0				2011-01-08	9.08621	5.15091	-7.26535	0				2011-01-08	7.88512	-12.5822	-22.9309	0
2011-01-09	7.15838	0.451721	-11.0056	0				2011-01-09	8.70246	3.60217	-7.57324	0				2011-01-09	9.94022	-7.31241	-19.5991	0
2011-01-10	4.1669	-2.99676	-12.4143	0				2011-01-10	8.25636	4.47336	-6.22201	0				2011-01-10	6.07496	-7.48489	-18.0129	0
2011-01-11	8.91248	-2.40158	-13.2957	0				2011-01-11	8.48031	-2.98978	-12.2377	0				2011-01-11	9.61009	-8.94418	-18.5789	0
2011-01-12	9.63969	1.14606	-12.9925	0				2011-01-12	8.36694	2.46372	-12.6882	0				2011-01-12	9.7068	-6.26126	-18.4874	0
2011-01-13	8.09541	1.24262	-11.1574	0				2011-01-13	8.3821	1.38928	-11.4991	0				2011-01-13	9.19688	-5.56326	-17.4973	0
2011-01-14	8.58876	-1.16556	-11.1789	0				2011-01-14	9.02833	-7.32721	-14.5048	0				2011-01-14	7.87195	-4.37262	-16.3825	0
2011-01-15	9.51238	1.44785	-11.9944	0				2011-01-15	10.1629	-3.23883	-15	0				2011-01-15	10.2409	3.13406	-11.2263	0
2011-01-16	8.95111	0.329468	-11.8854	0				2011-01-16	7.57435	-2.00299	-13.432	0				2011-01-16	9.15626	3.59351	-9.70792	0
2011-01-17	9.97833	1.49542	-10.9838	0				2011-01-17	7.56567	0.21637	-11.8047	0				2011-01-17	6.47963	0.530273	-9.64969	0
2011-01-18	9.51268	0.758331	-10.2922	0				2011-01-18	9.20976	-2.05054	-11.6504	0				2011-01-18	2.52517	-0.634369	-10.437	0.295147
2011-01-19	10.2926	-1.07617	-10.6014	0				2011-01-19	10.4822	-0.741119	-12.7009	0				2011-01-19	9.09178	-4.51489	-14.0366	0.012352
2011-01-20	5.435	-4.75119	-14.9834	0.233237				2011-01-20	9.78525	1.0163	-9.92166	0				2011-01-20	10.2102	-3.23019	-14.9937	0
2011-01-21	10.3279	-8.51929	-16.313	0				2011-01-21	9.29983	0.930603	-11.6552	0				2011-01-21	10.3397	1.45853	-10.746	0
2011-01-22	10.1119	-9.24374	-17.4633	0				2011-01-22	9.72762	2.15735	-11.4838	0				2011-01-22	5.36362	-0.326813	-11.7574	0
2011-01-23	9.23641	-6.26602	-17.0833	0				2011-01-23	10.4379	0.678406	-9.67194	0				2011-01-23	10.8265	-2.32803	-13.2427	0
2011-01-24	10.8567	-1.97641	-16.7893	0				2011-01-24	9.56119	-0.333649	-10.6145	0				2011-01-24	11.1039	2.47888	-10.5514	0
2011-01-25	10.587	1.18878	-13.4577	0				2011-01-25	9.2094	3.8494	-9.56204	0				2011-01-25	10.821	4.75076	-8.27402	0
2011-01-26	6.56494	-2.05869	-11.2736	0				2011-01-26	11.0107	-4.11529	-12.7733	0				2011-01-26	10.681	-3.29578	-13.4158	0
2011-01-27	4.44069	-5.00342	-12.5121	0.842194				2011-01-27	10.3174	-1.85083	-14.4098	0				2011-01-27	11.3225	-2.05753	-13.4432	0
2011-01-28	10.8764	-2.8334	-12.7716	0				2011-01-28	9.98581	0.511841	-11.3794	0.0132558				2011-01-28	11.3653	-0.767425	-12.2143	0
2011-01-29	11.2787	-0.98465	-14.3366	0				2011-01-29	8.90782	-3.29804	-11.2601	0.0179448				2011-01-29	11.5099	-2.37753	-13.3063	0
2011-01-30	11.7465	0.681763	-13.5677	0				2011-01-30	10.3004	0.361908	-13.7794	0				2011-01-30	11.2484	-0.844574	-13.5111	0
2011-01-31	11.5371	2.18271	-12.3748	0				2011-01-31	9.1905	2.5592	-7.97598	0				2011-01-31	11.5963	1.05987	-10.7986	0
2011-02-01	8.28436	0.594238	-9.00391	0				2011-02-01	8.18769	-0.227753	-9.26361	0.030325				2011-02-01	11.0272	0.396881	-10.5727	0
2011-02-02	10.5186	1.89441	-10.773	0				2011-02-02	10.8486	3.9014	-8.76379	0				2011-02-02	7.3413	1.21054	-9.9079	0
2011-02-03	11.9253	1.05127	-11.1765	0				2011-02-03	11.2803	5.56537	-5.9884	0				2011-02-03	4.49635	1.642	-9.00388	0
2011-02-04	12.2082	4.45664	-11.0391	0				2011-02-04	10.0826	4.06222	-9.04227	0				2011-02-04	11.3491	-0.786835	-11.6207	0.00898288
2011-02-05	12.2687	3.71335	-7.92767	0				2011-02-05	11.7059	7.14871	-5.4068	0				2011-02-05	12.6611	-0.628296	-12.7659	0
2011-02-06	12.1842	-0.0867004	-10.882	0				2011-02-06	12.8809	1.55923	-9.69672	0				2011-02-06	11.7882	-0.313141	-13.4622	0.0349611
2011-02-07	12.6351	4.08765	-7.81357	0				2011-02-07	11.475	4.00839	-6.42114	0				2011-02-07	7.86231	1.8183	-8.66583	0.0159097
2011-02-08	10.8161	2.62582	-8.25748	0.0375039				2011-02-08	12.3487	1.5892	-10.2551	0				2011-02-08	12.4264	-0.877258	-11.305	0
2011-02-09	10.4713	0.112701	-12.2097	0				2011-02-09	10.6476	5.86881	-6.45987	0				2011-02-09	12.933	1.05011	-13.4635	0
2011-02-10	14.1546	-3.13144	-13.9286	0				2011-02-10	10.4133	4.73029	-5.05515	0				2011-02-10	12.6246	-0.794403	-13.5147	0
2011-02-11	13.242	1.62808	-12.7773	0				2011-02-11	12.4499	8.0849	-6.21866	0				2011-02-11	12.9223	7.51032	-9.3465	0
2011-02-12	12.748	7.98193	-10.8315	0				2011-02-12	12.0272	11.8643	-1.39868	0				2011-02-12	12.6304	16.5864	0.504425	0
2011-02-13	11.9311	9.09625	-3.37451	0.0357209				2011-02-13	8.28346	8.75052	-4.43802	0.0153856				2011-02-13	11.8312	10.6801	-2.85745	0
2011-02-14	12.0363	7.18945	-5.19913	0.035237				2011-02-14	6.19303	1.56155	-9.73901	0.121421				2011-02-14	13.5992	8.29855	-3.29111	0
2011-02-15	13.5485	4.73782	-6.48733	0				2011-02-15	11.8802	3.64908	-8.13315	0				2011-02-15	10.6472	12.5086	-1.46182	0
2011-02-16	8.70616	8.97287	-6.83438	1.49895				2011-02-16	5.70533	4.8891	-7.75119	0				2011-02-16	5.01947	10.2169	-2.08426	0.780151
2011-02-17	12.757	-5.30127	-13.0601	0				2011-02-17	7.60923	-2.59927	-11.8242	0				2011-02-17	4.51228	3.97357	-4.95316	0.79541
2011-02-18	13.6193	-0.645813	-14.5392	0				2011-02-18	13.4206	1.47147	-10.8238	0				2011-02-18	4.00509	2.2861	-8.11044	0.258133
2011-02-19	14.5698	1.23172	-14.081	0				2011-02-19	13.9751	4.78955	-7.3779	0				2011-02-19	7.37552	2.12131	-8.63889	0.0730032
2011-02-20	14.742	6.12018	-9.48047	0				2011-02-20	15.2763	7.7218	-4.82727	0				2011-02-20	6.22625	2.86078	-9.2616	0.118627
2011-02-21	13.3264	9.18115	-3.59396	0				2011-02-21	12.9876	7.8381	-5.71082	0.35177				2011-02-21	12.3125	3.7569	-6.36243	0.0310384
2011-02-22	12.6149	9.29486	-3.67325	0				2011-02-22	14.4046	-0.552765	-9.51331	0				2011-02-22	13.7124	3.435	-6.1481	0
2011-02-23	8.15633	11.7045	-2.3009	0.0123059				2011-02-23	12.7516	7.48752	-5.17496	0				2011-02-23	13.7294	3.28467	-6.68784	0
2011-02-24	7.38527	11.1315	-1.85986	0.0405568				2011-02-24	15.2078	7.15311	-2.73636	0				2011-02-24	13.7523	3.51654	-5.57404	0.652519
2011-02-25	1.0596	1.30334	-4.86142	3.46501				2011-02-25	14.6981	8.70078	-2.88474	0				2011-02-25	7.56741	2.09756	-6.63117	3.46507
2011-02-26	7.553	-0.358093	-5.79932	0.817459				2011-02-26	12.7223	9.74911	-2.3736	0				2011-02-26	4.31433	1.49219	-8.55853	0.14031
2011-02-27	9.93361	0.926392	-7.78949	0.0430392				2011-02-27	8.23302	10.3386	0.585632	0.202447				2011-02-27	12.9405	4.81421	-5.39517	0
2011-02-28	17.088	0.238464	-8.69665	0				2011-02-28	16.3319	12.8173	-0.21933	0				2011-02-28	16.5832	1.85763	-7.37369	0
2011-03-01	15.0196	2.37412	-9.44153	0				2011-03-01	16.4725	11.9913	0.661896	0				2011-03-01	15.0829	4.78879	-5.97614	0.0192396
2011-03-02	17.6969	2.97421	-8.94925	0				2011-03-02	9.77357	7.10043	-1.77371	0				2011-03-02	6.0863	4.97952	-4.65454	0.0764191
2011-03-03	18.4804	3.90433	-8.78876	0				2011-03-03	15.2145	10.3742	-3.02072	0				2011-03-03	17.7429	10.8397	-2.62439	0
2011-03-04	18.7557	5.18317	-8.27786	0				2011-03-04	14.7609	8.45764	-2.36078	0				2011-03-04	7.3174	5.06628	-5.85599	0.0180995
2011-03-05	18.8645	3.33212	-8.06656	0				2011-03-05	17.533	12.4538	-2.37051	0				2011-03-05	18.5033	5.69461	-6.57819	0
2011-03-06	18.4197	6.31247	-9.21555	0				2011-03-06	17.6378	11.1476	-1.41064	0				2011-03-06	18.5865	10.2937	-2.58163	0
2011-03-07	13.9802	5.86545	-4.43994	0.074425				2011-03-07	17.9702	5.5079	-4.44916	0				2011-03-07	17.8953	6.4288	-3.60333	0
2011-03-08	15.7684	1.94101	-10.9184	0.0384814				2011-03-08	14.7702	7.32837	-5.08749	0.00243744				2011-03-08	19.2429	13.5645	-0.421051	0
2011-03-09	19.7996	-1.86728	-13.3663	0				2011-03-09	13.8573	8.95157	-4.21597	0.0281177				2011-03-09	19.1951	20.6989	4.00888	0.0125448
2011-03-10	19.4841	-0.315308	-14.2351	0				2011-03-10	18.5714	9.40509	-2.88156	0				2011-03-10	7.47852	13.0241	2.4285	2.21703
2011-03-11	19.5749	-0.914337	-12.0116	0				2011-03-11	14.277	13.4877	-0.301971	0.0365577				2011-03-11	17.2072	14.5985	2.60345	0.0242063
2011-03-12	19.7362	3.66162	-12.893	0				2011-03-12	16.1477	10.4615	-0.529175	0				2011-03-12	4.55927	10.5888	2.90463	0.209577
2011-03-13	17.5233	8.45706	-3.43677	0				2011-03-13	19.0935	10.658	-1.98843	0.0150197				2011-03-13	12.4394	15.5345	2.55527	0.0431766
2011-03-14	15.8337	14.1621	0.152679	0				2011-03-14	13.5253	15.0868	2.82401	0				2011-03-14	7.86325	17.4161	4.72766	0.0401469
2011-03-15	17.173	14.0111	3.90311	0.0172531				2011-03-15	18.8828	13.5115	3.15802	0				2011-03-15	14.8314	18.4453	4.15387	2.3605
2011-03-16	16.1717	11.7988	-1.20993	9.2738				2011-03-16	17.1043	15.2206	2.44022	0				2011-03-16	5.26639	6.36679	-1.61346	0.297787
2011-03-17	8.3845	4.33923	-4.42328	0.148171				2011-03-17	17.8594	18.615	5.47357	0				2011-03-17	16.3714	6.79297	-3.88708	0.0587121
2011-03-18	18.0227	9.60815	-2.45404	0.0875284				2011-03-18	19.5731	13.2834	2.13754	0				2011-03-18	15.5116	8.76614	-3.23636	0.0393604
2011-03-19	19.5946	3.55924	-4.10721	0				2011-03-19	18.1729	17.1261	4.03085	0				2011-03-19	17.849	14.4229	2.86545	0
2011-03-20	19.6759	8.27982	-2.7778	0				2011-03-20	17.3738	8.01874	1.0557	0				2011-03-20	19.2812	11.3234	0.739868	0
2011-03-21	18.927	15.5934	-1.20706	0				2011-03-21	19.7594	15.1002	1.52933	0				2011-03-21	19.9739	11.8539	0.527222	0
2011-03-22	18.4599	15.65	1.48813	0.0346363				2011-03-22	20.6965	15.0259	3.07217	0				2011-03-22	19.9166	11.7005	2.1824	0
2011-03-23	12.2287	14.3512	5.31515	0.0803732				2011-03-23	19.1947	16.8039	6.30179	0				2011-03-23	20.6846	12.6301	1.45676	0.0331512
2011-03-24	12.8634	13.7218	4.07355	0.0926486				2011-03-24	21.3687	18.1877	4.37778	0				2011-03-24	21.757	12.8692	2.31665	0.0368371
2011-03-25	18.9809	17.6582	3.34381	0				2011-03-25	21.8921	26.2817	7.52939	0				2011-03-25	21.6956	16.0943	3.15973	0
2011-03-26	20.5998	13.8248	-4.03009	0				2011-03-26	19.9409	23.6781	8.81149	0.0647258				2011-03-26	18.308	16.8012	4.17142	0.00826278
2011-03-27	21.9686	3.42304	-5.1084	0				2011-03-27	12.3969	12.6884	0.742065	0.105539				2011-03-27	10.8733	9.55069	-1.16067	0.0387193
2011-03-28	21.8681	6.66483	-3.81683	0				2011-03-28	21.8448	12.2724	-0.91275	0				2011-03-28	22.1531	12.4685	-0.496521	0
2011-03-29	17.8915	18.0228	0.573578	0.108727				2011-03-29	20.9567	18.597	3.11319	0				2011-03-29	21.7141	15.7776	2.87387	0
2011-03-30	19.3529	15.8103	-0.325592	0.0445537				2011-03-30	16.9632	18.644	5.86649	0				2011-03-30	18.6134	22.9436	6.51453	0
2011-03-31	15.8715	5.86441	-2.36221	0.00826769				2011-03-31	16.8733	21.5658	7.22	0				2011-03-31	21.2666	24.5088	11.4223	0
2011-04-01	20.051	5.2225	-2.51474	0				2011-04-01	6.00292	16.0282	6.74124	3.86869				2011-04-01	23.0286	25.5014	12.3147	0.00527651
2011-04-02	22.9242	8.84924	-0.687561	0				2011-04-02	20.8251	18.3317	7.05286	0				2011-04-02	10.4535	20.5499	5.71036	0
2011-04-03	23.5784	14.3259	1.57187	0				2011-04-03	22.2246	24.3733	9.09152	0.289955				2011-04-03	13.0456	8.45255	-1.07455	0.286287
2011-04-04	22.0849	18.6279	2.03384	0				2011-04-04	14.8251	22.9964	9.15717	3.42699				2011-04-04	12.6235	9.07004	-0.5224	0
2011-04-05	23.1557	20.7762	5.80771	0				2011-04-05	7.67076	17.8052	7.11893	0.80434				2011-04-05	5.11119	9.48483	-0.248505	0.560738
2011-04-06	22.105	23.3986	7.8475	0.118835				2011-04-06	14.7571	15.7532	5.60492	0.0169697				2011-04-06	10.2034	9.02579	1.09354	0.25953
2011-04-07	21.0829	16.1706	1.30045	0				2011-04-07	22.751	19.0682	7.30029	0				2011-04-07	5.60889	7.50516	-0.776276	0.287944
2011-04-08	22.9949	9.46256	-0.757721	0				2011-04-08	24.1879	20.2881	8.75165	0				2011-04-08	21.9179	14.8121	3.7269	0
2011-04-09	24.3789	9.95462	-0.83313	0				2011-04-09	23.8214	21.283	9.51205	0				2011-04-09	23.412	13.7856	3.55835	0.150191
2011-04-10	22.1649	14.0323	0.950073	0				2011-04-10	18.2481	18.5877	6.40262	0				2011-04-10	7.2715	8.0162	1.76428	9.54077
2011-04-11	22.6521	15.0931	3.19897	0				2011-04-11	20.2793	20.4144	9.4874	0				2011-04-11	6.17128	2.88339	-3.55551	3.63135
2011-04-12	24.096	18.7709	4.86499	0				2011-04-12	23.8494	27.3682	11.3549	0				2011-04-12	10.9876	3.98453	-4.11175	0.981886
2011-04-13	25.0221	17.5762	5.54654	0				2011-04-13	23.7829	24.257	10.4848	0				2011-04-13	18.9844	9.95584	1.02292	0.0290899
2011-04-14	22.8937	26.7135	9.61264	0.0174631				2011-04-14	21.9921	21.7984	8.8905	0				2011-04-14	22.1604	14.7487	3.54495	0.0182943
2011-04-15	25.1507	26.1001	15.0221	0				2011-04-15	22.3301	22.6443	11.8866	0				2011-04-15	20.7206	15.2873	4.09741	0
2011-04-16	23.1742	27.3114	15.0538	0.146534				2011-04-16	15.6115	19.7077	8.45486	3.72237				2011-04-16	24.7384	17.573	5.89258	0
2011-04-17	23.1743	27.2627	15.3581	0.0865123				2011-04-17	23.3517	24.7524	10.8733	0				2011-04-17	22.7621	15.7447	4.28146	0
2011-04-18	12.6132	17.2163	8.50311	0.894594				2011-04-18	23.2903	26.7929	14.8599	0.151586				2011-04-18	23.252	14.0591	4.58108	0
2011-04-19	19.8029	17.3201	8.43173	0.174019				2011-04-19	19.4224	21.7593	11.8492	0.177345				2011-04-19	24.8817	16.0748	6.48065	0.300244
2011-04-20	4.79471	12.7272	6.14157	2.72937				2011-04-20	22.5096	22.8391	10.2165	0				2011-04-20	24.5609	16.0645	5.88577	0.195673
2011-04-21	14.4558	14.2757	5.8595	17.0325				2011-04-21	20.9063	27.1915	12.542	0.115255				2011-04-21	24.6112	18.1483	6.64514	0.0712377
2011-04-22	24.297	17.644	7.1528	0				2011-04-22	19.6375	27.0641	15.2875	0				2011-04-22	25.4962	18.4386	6.77011	0
2011-04-23	21.7302	19.3899	8.48053	0.0202582				2011-04-23	23.4347	24.7013	13.1304	0				2011-04-23	24.6642	19.0701	8.52563	0
2011-04-24	25.3677	22.0404	9.77234	0				2011-04-24	19.453	24.606	14.9082	0.0327247				2011-04-24	23.5079	20.9798	11.025	0.0119018
2011-04-25	20.4936	22.7616	11.4285	0.0680667				2011-04-25	25.0333	26.2381	13.1404	0				2011-04-25	25.1486	24.0439	10.6976	0.00982022
2011-04-26	17.519	20.5381	12.1495	1.37674				2011-04-26	23.2032	28.8773	14.6477	0				2011-04-26	22.7992	23.513	11.7672	0
2011-04-27	24.3177	25.5735	13.2053	0				2011-04-27	19.2529	26.4708	8.57028	0.361557				2011-04-27	5.88323	17.7121	10.007	0.0629502
2011-04-28	11.5252	19.1819	12.6517	0.0362271				2011-04-28	4.82885	11.865	4.63638	2.66076				2011-04-28	11.5891	21.1509	13.5533	1.81417
2011-04-29	21.6496	26.5902	14.3804	0				2011-04-29	23.7206	18.8253	7.05759	0				2011-04-29	17.5146	20.7413	12.0027	0.110893
2011-04-30	21.7143	29.2439	16.3838	0.129265				2011-04-30	10.3602	19.5557	10.051	0.0229302				2011-04-30	26.4351	21.6692	9.45184	0
2011-05-01	24.8152	20.7456	8.62964	0				2011-05-01	16.3817	22.3127	11.2357	0				2011-05-01	24.5199	18.2538	7.68155	0
2011-05-02	24.4828	30.6641	9.87616	0.203545				2011-05-02	20.441	26.4396	12.8073	0				2011-05-02	16.7172	17.5707	8.32858	0.0327993
2011-05-03	24.1182	22.18	11.3935	0.0163017				2011-05-03	23.843	27.3834	14.0139	0.0516251				2011-05-03	18.7394	20.4678	10.3256	0.0723192
2011-05-04	26.5735	23.4789	12.5748	0				2011-05-04	10.5017	19.8533	10.9408	0.18209				2011-05-04	24.1324	21.2635	6.27789	0
2011-05-05	24.5176	26.7982	13.2863	0				2011-05-05	26.7183	20.1637	11.2747	0				2011-05-05	26.3686	20.5777	9.12405	0.314144
2011-05-06	21.6827	27.8271	15.6557	0				2011-05-06	27.0654	25.0549	12.4588	0				2011-05-06	23.2416	22.0361	11.0738	0.112537
2011-05-07	26.1708	30.7218	18.0859	0				2011-05-07	27.9745	28.2353	14.8275	0				2011-05-07	26.9446	24.7489	13.4317	0
2011-05-08	23.6771	30.5871	20.723	0.270858				2011-05-08	27.157	28.6522	17.2206	0				2011-05-08	25.3803	26.3541	14.87	0
2011-05-09	11.9582	22.8625	4.10065	8.9035				2011-05-09	25.5992	29.1763	17.6014	0.10268				2011-05-09	26.781	28.0226	15.8243	0
2011-05-10	27.0423	15.7033	6.69769	0				2011-05-10	25.3112	27.1614	16.4073	0				2011-05-10	26.1134	27.2166	15.5936	0.0910748
2011-05-11	21.9996	16.775	8.63266	0				2011-05-11	23.7933	28.143	17.0451	0.133862				2011-05-11	9.08978	19.0328	12.4999	6.59168
2011-05-12	26.115	20.9358	10.4624	0				2011-05-12	25.0403	27.4604	17.2521	0.17048				2011-05-12	5.55609	14.4656	8.92148	5.94049
2011-05-13	22.7352	24.5912	12.0589	0.18449				2011-05-13	19.4624	25.9025	15.4202	1.27883				2011-05-13	24.0076	17.3899	10.4267	0.0965911
2011-05-14	28.6027	20.6135	11.2666	0				2011-05-14	19.8736	27.6164	14.5289	0.0695801				2011-05-14	22.6163	21.215	12.1502	0
2011-05-15	21.6986	27.1713	13.8015	0.918577				2011-05-15	7.98498	19.5656	13.2288	2.95274				2011-05-15	23.922	21.4271	12.3792	0.125229
2011-05-16	17.2386	23.2713	14.9513	0.742298				2011-05-16	29.0684	26.0833	13.8535	0				2011-05-16	27.2067	23.4776	12.2219	0
2011-05-17	23.4492	27.6603	15.4036	0				2011-05-17	26.8683	27.8516	15.6161	0.132535				2011-05-17	27.6365	23.6681	13.4966	0.0745592
2011-05-18	14.8573	21.8196	12.8866	0.270976				2011-05-18	18.3356	22.0619	12.2731	1.3287				2011-05-18	25.858	25.3898	15.467	0.320841
2011-05-19	27.745	24.8062	14.273	0				2011-05-19	26.0844	19.7587	11.9716	0.169334				2011-05-19	25.464	27.9273	16.243	3.16354
2011-05-20	26.6594	23.7954	11.3344	0.0266053				2011-05-20	21.1582	20.753	12.1679	0				2011-05-20	25.1027	28.7144	17.0717	3.9653
2011-05-21	27.5298	20.2797	11.4028	0.0382242				2011-05-21	27.3978	21.5537	11.8646	0				2011-05-21	26.6832	30.555	18.2716	0.104697
2011-05-22	25.0739	24.5353	14.8032	0.0871347				2011-05-22	27.7334	23.2688	13.5763	0				2011-05-22	22.1385	25.5279	16.9467	0.0745906
2011-05-23	26.9924	27.5759	16.4604	0				2011-05-23	21.4349	27.9978	16.4672	0.178874				2011-05-23	23.1324	24.9068	16.2682	0
2011-05-24	21.5914	26.2418	13.8437	0				2011-05-24	16.3671	22.7656	13.684	0.229436				2011-05-24	23.0524	27.4701	14.3034	0
2011-05-25	26.7016	27.1279	14.8939	0.189149				2011-05-25	27.6985	20.6053	11.4854	0				2011-05-25	27.4633	22.7162	10.7156	0
2011-05-26	24.7547	28.1223	17.4133	0.308239				2011-05-26	28.7731	20.8038	12.223	0				2011-05-26	28.7949	22.5844	12.2015	0
2011-05-27	28.8546	32.3631	18.4798	0				2011-05-27	30.4937	26.1443	14.6661	0				2011-05-27	25.42	20.6134	10.7295	0
2011-05-28	28.5839	35.2274	20.6003	0				2011-05-28	27.4023	30.4842	17.707	0				2011-05-28	28.9247	23.0931	14.1119	0
2011-05-29	25.816	34.3094	23.0064	0				2011-05-29	25.4698	22.989	10.9916	0				2011-05-29	26.9515	29.1661	17.9243	0.149808
2011-05-30	21.5922	28.2872	17.1787	3.7095				2011-05-30	28.6206	20.1604	12.2089	0				2011-05-30	19.617	24.9603	13.4815	0.121822
2011-05-31	24.0754	26.4223	15.565	0.0629459				2011-05-31	28.821	24.3058	13.7635	0				2011-05-31	28.5132	24.2173	15.5942	0
2011-06-01	26.6995	25.874	16.6763	0.65275				2011-06-01	30.1349	30.0411	17.3603	0				2011-06-01	22.8997	24.9104	15.9532	0.161614
2011-06-02	15.1276	21.0896	15.2544	0.920431				2011-06-02	29.5289	31.1893	19.1487	0				2011-06-02	27.6803	27.567	16.9459	0.222812
2011-06-03	22.8879	20.6217	13.2254	0				2011-06-03	29.0795	28.3684	18.0771	0				2011-06-03	26.7834	22.109	12.465	0
2011-06-04	23.7773	21.3091	13.5497	0.140885				2011-06-04	23.7373	23.7281	14.4137	0.0373716				2011-06-04	29.2042	24.1016	15.263	0
2011-06-05	11.6935	16.5004	9.90271	2.31012				2011-06-05	26.423	20.0088	13.1825	0				2011-06-05	26.3225	26.7471	15.7545	0
2011-06-06	19.6878	19.79	12.4184	0.096598				2011-06-06	28.3494	22.0298	13.526	0.126096				2011-06-06	26.99	28.0732	18.0289	0
2011-06-07	27.8549	25.0434	15.4643	0				2011-06-07	29.2843	23.4556	14.8754	0				2011-06-07	27.7982	28.9032	18.1034	0
2011-06-08	24.8697	26.4433	17.4437	0				2011-06-08	28.9262	26.6539	16.4623	0.169189				2011-06-08	29.4149	29.6322	18.2183	0
2011-06-09	16.4413	23.2624	17.4291	0				2011-06-09	20.6747	24.6212	16.4	0.377088				2011-06-09	27.6872	27.161	15.8943	0.0743759
2011-06-10	23.9167	24.5149	16.3549	1.74872				2011-06-10	28.5582	27.3786	17.583	0				2011-06-10	24.1018	23.2473	13.4487	0
2011-06-11	22.6756	24.4793	15.806	0.0766619				2011-06-11	29.101	30.3945	18.0282	0				2011-06-11	24.6945	24.076	15.4387	1.33815
2011-06-12	23.8821	25.2655	15.5247	0.0307492				2011-06-12	21.1303	30.6046	20.2024	0				2011-06-12	27.8532	26.7205	16.3648	0
2011-06-13	18.2584	23.2868	16.266	0				2011-06-13	24.0132	31.389	19.9978	0				2011-06-13	28.9333	28.6054	18.1719	0
2011-06-14	27.1304	26.3485	16.9556	0				2011-06-14	27.1234	28.1247	19.085	0.108143				2011-06-14	27.0272	28.4362	18.1278	0.0261275
2011-06-15	24.1385	27.5872	17.3125	0.0922261				2011-06-15	29.9291	32.289	19.7032	0				2011-06-15	25.7061	30.4696	19.6203	0.0615364
2011-06-16	29.043	28.6451	16.8273	0				2011-06-16	26.1355	28.0767	18.8288	0				2011-06-16	11.1056	26.2834	18.6385	0.950462
2011-06-17	29.8983	29.8105	17.425	0.280485				2011-06-17	30.5605	30.7929	19.8614	0				2011-06-17	25.1748	32.659	19.1936	0.0190135
2011-06-18	29.2309	28.1398	17.022	0				2011-06-18	29.25	34.6491	21.4755	0				2011-06-18	27.5649	32.0989	20.5855	0
2011-06-19	26.4377	27.6663	18.873	0				2011-06-19	26.6879	35.5244	22.2122	0				2011-06-19	23.1276	32.3432	21.9592	0.132369
2011-06-20	26.6007	30.1166	20.7718	0				2011-06-20	19.9643	34.968	21.4753	0.239669				2011-06-20	25.5653	31.727	19.9586	0.104797
[truncated: 32,701 more rows]

## Sheet: RCP 4.5
Yongning
MIROC5								IPSL-CM5A-MR								GFDL-ESM2G
Date	solar radiation (MJ/m2)	Tmax (°C)	Tmin (°C)	precipitation (mm)				Date	solar radiation (MJ/m2)	Tmax (°C)	Tmin (°C)	precipitation (mm)				Date	solar radiation (MJ/m2)	Tmax (°C)	Tmin (°C)	precipitation (mm)
2006-01-01	8.81821	-3.54916	-14.4994	0				2006-01-01	5.90552	2.71783	-5.64273	0				2006-01-01	8.12251	-5.87369	-15.7211	0
2006-01-02	8.01692	-2.62186	-13.509	0				2006-01-02	1.78084	1.17551	-7.33212	0				2006-01-02	8.86725	-0.599152	-12.4802	0
2006-01-03	8.27443	-1.07669	-12.2117	0				2006-01-03	7.28119	3.91626	-9.47205	0.0220542				2006-01-03	8.98966	-1.19058	-15.2262	0
2006-01-04	8.76207	-2.32291	-12.0017	0				2006-01-04	3.55213	-9.30133	-16.8916	0.0740504				2006-01-04	9.22273	-10.2939	-17.289	0
2006-01-05	8.06943	-1.61697	-12.1533	0				2006-01-05	7.33127	-11.5877	-20.799	0				2006-01-05	8.76337	-4.85321	-15.6403	0
2006-01-06	8.18404	-2.47134	-12.1737	0				2006-01-06	8.85335	-6.63632	-18.7445	0				2006-01-06	8.16172	-0.545349	-13.7819	0
2006-01-07	9.11129	1.85675	-11.623	0				2006-01-07	9.06907	-3.31253	-13.6159	0				2006-01-07	8.95815	1.76437	-10.3293	0
2006-01-08	9.12109	2.37717	-8.60104	0				2006-01-08	10.2311	-1.48184	-12.25	0				2006-01-08	8.25174	1.11099	-8.6022	0
2006-01-09	8.677	2.45908	-9.85049	0				2006-01-09	8.92482	-0.830566	-12.0562	0				2006-01-09	3.39349	-0.339386	-10.3172	0
2006-01-10	8.15232	2.31189	-10.0345	0				2006-01-10	9.02004	1.27371	-9.93588	0				2006-01-10	3.06485	-1.52664	-11.0134	0
2006-01-11	5.54789	-0.199127	-9.08371	0				2006-01-11	8.47155	4.25818	-7.53268	0				2006-01-11	7.60756	-1.45923	-11.7985	0
2006-01-12	5.87228	0.50058	-9.67471	0				2006-01-12	9.2992	2.96091	-7.53247	0				2006-01-12	8.172	-0.847687	-11.2379	0
2006-01-13	8.83111	4.60751	-10.3752	0				2006-01-13	7.25324	-0.144196	-10.8837	0				2006-01-13	4.29754	-1.2066	-11.8516	0
2006-01-14	4.55104	0.658295	-10.0173	0.494119				2006-01-14	5.623	-3.52744	-13.0545	0				2006-01-14	3.96783	-3.77145	-12.5558	0
2006-01-15	8.79855	-4.04846	-11.4943	0.0186405				2006-01-15	9.34892	-1.25519	-13.2683	0				2006-01-15	5.61147	-2.17401	-12.9988	0
2006-01-16	8.81483	-5.75897	-12.7741	0				2006-01-16	3.91253	-5.77936	-14.4527	0				2006-01-16	9.89828	-1.13394	-13.6665	0
2006-01-17	9.36989	-0.960236	-12.2582	0				2006-01-17	10.0084	-2.74802	-14.8216	0				2006-01-17	10.3896	0.692841	-12.6927	0
2006-01-18	6.80874	-0.0359497	-8.73355	0.0440886				2006-01-18	8.96239	1.83688	-11.1524	0				2006-01-18	7.42961	-0.154053	-9.83542	0
2006-01-19	9.91705	1.63681	-7.15512	0				2006-01-19	10.1883	-4.54672	-15.3499	0.0285059				2006-01-19	8.62685	-1.89511	-12.4954	0
2006-01-20	6.9503	1.53915	-5.36771	0				2006-01-20	7.5665	-9.62598	-20.3237	0.122648				2006-01-20	8.71849	-0.0393982	-10.7006	0
2006-01-21	9.71405	4.11417	-8.85538	0.434285				2006-01-21	8.62367	-9.16675	-22.3686	0				2006-01-21	5.03761	-1.9147	-14.2749	0
2006-01-22	10.2332	-9.16492	-18.976	0				2006-01-22	7.8188	-4.4581	-17.354	0				2006-01-22	10.8731	-2.98334	-14.6134	0
2006-01-23	10.1228	-5.97275	-20.4802	0				2006-01-23	10.165	-0.951996	-13.2496	0				2006-01-23	9.78873	-0.753723	-12.6464	0
2006-01-24	10.2262	-2.68713	-15.0513	0				2006-01-24	6.20018	-0.325562	-12.733	0				2006-01-24	10.8174	0.288971	-10.818	0
2006-01-25	2.45957	0.188599	-11.2201	0				2006-01-25	3.59498	0.776184	-16.1686	0				2006-01-25	10.7636	4.4017	-6.2178	0
2006-01-26	9.60241	3.39389	-11.9397	0				2006-01-26	11.1423	-9.90268	-20.5363	0				2006-01-26	8.64358	5.53619	-4.83789	0
2006-01-27	11.227	-8.01996	-14.885	0				2006-01-27	11.159	-8.49133	-21.2108	0				2006-01-27	9.35224	9.21729	-5.01559	0.0119195
2006-01-28	11.2271	-4.72614	-15.8512	0.0276475				2006-01-28	6.32076	-2.89816	-14.782	0				2006-01-28	6.923	3.80063	-8.04428	0.40726
2006-01-29	8.48599	-1.01477	-12.967	0.0825119				2006-01-29	10.2962	-9.15613	-16.6823	0				2006-01-29	1.03233	0.274384	-8.99377	0.434963
2006-01-30	9.85731	-9.14731	-16.266	0.0558624				2006-01-30	12.1001	-4.96591	-16.7314	0				2006-01-30	5.56731	-2.51392	-12.0536	0.0991802
2006-01-31	10.2894	-7.61289	-17.9482	0				2006-01-31	11.7405	0.763184	-13.0439	0				2006-01-31	7.92814	-0.183685	-10.593	0
2006-02-01	11.8124	-2.16153	-16.8402	0				2006-02-01	6.7556	-0.399689	-11.0735	0				2006-02-01	8.62886	-2.25775	-12.1138	0.0319738
2006-02-02	12.3097	1.27884	-16.9687	0				2006-02-02	11.282	-0.190491	-11.2984	0				2006-02-02	6.46501	-1.25092	-12.93	0
2006-02-03	12.3493	4.23914	-14.0607	0				2006-02-03	2.71201	-1.79242	-12.3053	0				2006-02-03	10.5991	1.18842	-10.6972	0
2006-02-04	11.7475	6.74362	-7.97012	0				2006-02-04	12.0932	-4.18359	-15.5735	0				2006-02-04	10.3615	2.40585	-8.79269	0
2006-02-05	11.66	8.99634	-4.60855	0.10262				2006-02-05	13.0472	0.748321	-12.0639	0				2006-02-05	12.3951	7.53507	-5.64966	0
2006-02-06	11.9813	0.7948	-5.76395	1.14				2006-02-06	12.787	3.12711	-9.47092	0				2006-02-06	11.4413	-2.56641	-12.4268	0
2006-02-07	12.3027	0.622955	-6.70059	0				2006-02-07	10.761	1.59473	-8.81326	0.0147855				2006-02-07	12.5417	-1.16818	-14.0147	0
2006-02-08	0.530322	-1.05609	-9.34744	0.085495				2006-02-08	9.04566	3.26877	-8.25156	0.0542192				2006-02-08	12.0146	3.81934	-9.49722	0
2006-02-09	12.9891	1.42542	-11.0288	0				2006-02-09	8.46397	4.40921	-7.20843	0				2006-02-09	12.1966	-1.9418	-11.5531	0
2006-02-10	13.7349	4.20828	-11.2027	0				2006-02-10	7.79945	4.30536	-7.17661	0.58913				2006-02-10	12.8811	2.26459	-9.35819	0
2006-02-11	12.8855	5.18628	-9.09152	0				2006-02-11	8.29439	5.29251	-7.96677	0.0786347				2006-02-11	13.0123	5.79205	-8.02982	0
2006-02-12	12.7787	-1.38	-12.4435	0				2006-02-12	9.09485	1.67941	-10.8147	0.0606151				2006-02-12	13.3259	7.06387	-5.11304	0
2006-02-13	13.6281	5.04068	-11.932	0				2006-02-13	7.15843	2.58096	-9.76211	0				2006-02-13	13.6991	8.01855	-3.93799	0
2006-02-14	13.0656	10.3869	-7.5986	0				2006-02-14	10.8933	7.18704	-5.22232	0				2006-02-14	13.2521	7.46359	-4.81436	0
2006-02-15	10.1511	6.88971	-3.95755	5.14351e-05				2006-02-15	13.4613	9.80295	-4.27621	0				2006-02-15	13.594	4.00992	-6.67032	0
2006-02-16	6.7847	5.80926	-4.19022	0.256216				2006-02-16	12.4107	6.37741	-2.73944	0.0709325				2006-02-16	12.3642	4.11795	-6.08966	0
2006-02-17	8.90516	11.9887	-4.69806	0				2006-02-17	4.10799	1.75165	-8.54257	0.347752				2006-02-17	11.2251	-0.413849	-11.1331	0
2006-02-18	12.101	2.45001	-6.20743	0.0169494				2006-02-18	13.9792	-1.8125	-11.9565	0				2006-02-18	14.2902	-0.460358	-12.1991	0
2006-02-19	11.4305	1.16199	-6.61633	0.0698019				2006-02-19	13.6111	2.55454	-11.264	0				2006-02-19	13.9687	2.65311	-10.3657	0
2006-02-20	14.7226	10.4734	-4.58002	0				2006-02-20	14.4648	7.62967	-6.46512	0				2006-02-20	15.3559	7.40024	-3.82434	0
2006-02-21	11.3515	6.42673	-3.60538	0				2006-02-21	11.2793	8.25363	-4.01382	0				2006-02-21	7.29999	4.80557	-4.70801	0.186124
2006-02-22	14.1404	10.4574	-2.5892	0				2006-02-22	13.4063	9.90402	-1.25659	0				2006-02-22	9.85107	2.63058	-6.32782	0
2006-02-23	13.88	8.28	-3.42313	0				2006-02-23	9.4213	9.71732	-1.95776	0.0333345				2006-02-23	11.7127	4.23523	-5.93332	0
2006-02-24	15.4344	8.86453	-3.29654	0				2006-02-24	11.7921	4.13538	-4.51126	0.217477				2006-02-24	15.6746	7.76364	-3.12866	0
2006-02-25	11.7739	10.1264	-3.25381	0.232659				2006-02-25	14.1629	6.62491	-4.57693	0				2006-02-25	15.1743	13.7474	-0.634796	0
2006-02-26	3.15042	6.06287	-2.02261	0.0733053				2006-02-26	14.9502	4.67261	-5.87528	0				2006-02-26	7.14065	9.75076	-1.35877	0.018684
2006-02-27	14.1972	12.3494	-2.29172	0				2006-02-27	8.36806	4.83536	-6.71551	0.37155				2006-02-27	5.05809	3.47919	-4.20651	3.55929
2006-02-28	15.8046	8.48425	-2.74597	0				2006-02-28	15.7656	5.5416	-5.54303	0.022132				2006-02-28	4.76887	3.56097	-5.99741	1.58289
2006-03-01	8.31559	7.41376	-2.89941	0.0323533				2006-03-01	14.7	8.09634	-4.12912	0				2006-03-01	8.03949	1.72256	-8.68408	0.346913
2006-03-02	16.3185	10.1201	-1.48438	0				2006-03-02	14.9338	6.991	-3.47906	0				2006-03-02	6.56567	0.2005	-10.1298	2.76498
2006-03-03	10.7317	7.94724	-2.68271	7.69482				2006-03-03	16.2102	13.0638	-2.56186	0				2006-03-03	11.5793	-0.400971	-11.3592	0
2006-03-04	8.92168	4.21912	-3.92227	0.0172126				2006-03-04	11.1915	13.3046	-2.24435	0.521353				2006-03-04	14.6416	1.20886	-8.5278	0.00133956
2006-03-05	18.4683	9.17862	-4.63522	0				2006-03-05	10.7471	0.0793762	-8.86102	0.850784				2006-03-05	17.3678	4.72794	-7.07657	0
2006-03-06	15.5243	13.9404	-1.49667	0.0359274				2006-03-06	18.4255	-0.797363	-11.6782	0.010326				2006-03-06	18.6564	5.73932	-7.11871	0
2006-03-07	3.75453	0.587555	-7.29318	0.0834232				2006-03-07	18.4616	4.71829	-8.24832	0				2006-03-07	18.6309	4.61911	-5.4671	0
2006-03-08	20.245	-4.99594	-17.2061	0				2006-03-08	16.3385	7.29971	-4.02862	0.0475731				2006-03-08	18.3818	7.84982	-3.84433	0.017525
2006-03-09	20.4676	-3.64258	-19.9086	0				2006-03-09	12.4051	3.40057	-6.14883	0				2006-03-09	19.2597	14.6475	0.00772095	0
2006-03-10	19.2669	4.83221	-14.1647	0				2006-03-10	17.5746	4.56903	-5.92764	0				2006-03-10	13.448	13.0786	2.44803	0.422466
2006-03-11	18.1127	8.60004	-2.46155	0				2006-03-11	18.2286	2.7052	-8.84689	0				2006-03-11	3.04423	13.3428	3.29901	0.143139
2006-03-12	11.4152	9.26346	-2.51535	0.0229575				2006-03-12	17.9339	6.12067	-5.71671	0				2006-03-12	10.7733	12.0518	2.52033	0.0429417
2006-03-13	15.5063	9.02325	-1.72314	0.217235				2006-03-13	19.177	8.57864	-4.95807	0				2006-03-13	17.0255	11.0318	0.823395	0
2006-03-14	9.63021	4.20456	-2.14981	0.119792				2006-03-14	18.4372	4.69559	-6.32517	0				2006-03-14	15.575	11.5579	0.904419	0.0571915
2006-03-15	19.4302	9.02451	-0.889008	0				2006-03-15	18.7151	5.94943	-4.29916	0.0180279				2006-03-15	8.30412	9.55597	1.01544	3.65631
2006-03-16	16.3315	5.10892	-1.15088	0.0102415				2006-03-16	14.6566	7.1127	-3.29071	0.101				2006-03-16	5.77172	8.66302	-1.33255	7.43494
2006-03-17	19.17	9.51361	-1.46494	0				2006-03-17	7.26902	5.09811	-3.1879	0.160623				2006-03-17	13.476	8.51254	-1.08664	0.0971442
2006-03-18	16.4996	15.5295	-0.963776	0.0536202				2006-03-18	8.92416	3.48517	-5.6622	0.206633				2006-03-18	12.5246	6.97681	-3.95581	0.0411683
2006-03-19	11.4322	18.1975	4.21448	0.0250661				2006-03-19	16.5282	9.35571	-2.62192	0.0458949				2006-03-19	18.4276	12.8776	1.89789	0.151221
2006-03-20	12.9393	16.279	4.89795	0.329147				2006-03-20	16.887	12.8	0.657471	0				2006-03-20	19.4409	15.4019	4.2821	0
2006-03-21	14.5557	15.5882	3.14395	0.0944736				2006-03-21	13.4347	12.6942	1.57977	0.052912				2006-03-21	12.68	11.8108	3.25189	0.0207704
2006-03-22	14.3751	20.5697	8.824	0.0526474				2006-03-22	8.76644	5.22763	-5.30002	0.230782				2006-03-22	16.2381	19.6258	7.2739	0
2006-03-23	16.3188	17.2469	8.63287	0.0060753				2006-03-23	18.9069	5.29135	-3.88769	0.0260725				2006-03-23	10.1361	15.5032	2.13376	0.233186
2006-03-24	11.878	16.7414	8.57623	0				2006-03-24	20.9062	7.77048	-3.97479	0.0302235				2006-03-24	11.6385	7.16577	-1.0527	0.0743831
2006-03-25	18.8134	16.8959	2.29666	0.0430815				2006-03-25	19.0944	11.4705	-1.1994	0				2006-03-25	9.66329	5.27435	-4.26837	0.459383
2006-03-26	16.4904	9.65469	0.532562	0.0201001				2006-03-26	19.0615	14.3348	1.1709	0				2006-03-26	11.1369	5.48752	-3.77597	3.81002
2006-03-27	15.995	17.3704	3.96674	0.296978				2006-03-27	9.65316	12.1291	0.280182	0.0725711				2006-03-27	9.3666	5.5928	-3.52679	0.510313
2006-03-28	15.2337	8.63434	1.61554	0.0781116				2006-03-28	15.6461	14.6364	2.9231	0.792011				2006-03-28	14.8553	6.19925	-4.00845	0.402115
2006-03-29	8.81482	14.9422	2.67856	0.0698169				2006-03-29	17.387	16.4739	4.97327	0.134796				2006-03-29	16.1487	8.53946	-3.35278	0.0631796
2006-03-30	10.166	14.4082	4.0007	1.15491				2006-03-30	11.3868	14.9382	4.96341	0.726942				2006-03-30	22.5115	8.38135	-2.52237	0
2006-03-31	2.82659	6.60529	0.805084	0.260768				2006-03-31	3.31755	7.4852	0.111908	6.35716				2006-03-31	21.4616	13.7384	2.77371	0.0119574
2006-04-01	14.6793	7.50717	-0.297119	0				2006-04-01	14.2593	6.40362	-2.53165	0.062771				2006-04-01	16.9798	13.0254	-1.4566	0
2006-04-02	21.9746	13.1586	1.34131	0				2006-04-02	17.3984	7.96231	-1.09848	0				2006-04-02	22.2541	5.8717	-2.3277	0
2006-04-03	22.1802	19.5163	2.14117	0				2006-04-03	22.1408	11.7507	0.673492	0.0190532				2006-04-03	22.6276	11.4558	-0.67807	0.206097
2006-04-04	15.9698	18.8912	7.93207	0.209886				2006-04-04	22.4391	16.7039	4.14139	0				2006-04-04	9.76563	10.1517	0.674896	3.95224
2006-04-05	16.4086	19.4788	7.97656	0.0364015				2006-04-05	24.08	18.8277	6.78876	0				2006-04-05	21.7596	8.45029	-0.350037	0
2006-04-06	16.7365	15.2754	5.91202	0				2006-04-06	22.7434	16.9101	5.84949	0.0150202				2006-04-06	22.2598	12.8578	2.34427	0
2006-04-07	8.9021	11.526	1.95331	0				2006-04-07	19.9019	15.0088	0.351135	0				2006-04-07	23.8738	15.8004	4.04904	0
2006-04-08	15.3885	7.89127	0.796295	0.0439324				2006-04-08	24.4002	18.6164	3.4086	0				2006-04-08	23.4778	20.2402	7.89932	0
2006-04-09	20.9913	14.9681	2.41016	0.214088				2006-04-09	22.4395	25.1715	6.0434	0.0212791				2006-04-09	23.4061	22.0731	10.5525	0
2006-04-10	19.3606	15.6348	5.5199	0.308488				2006-04-10	16.1023	19.04	8.168	0.93998				2006-04-10	19.096	18.9802	5.0777	0.0996564
2006-04-11	15.746	6.09	-2.41507	0.274278				2006-04-11	4.26223	12.925	4.62622	4.95948				2006-04-11	21.6046	15.4207	4.6416	0
2006-04-12	26.2355	7.384	-1.9722	0				2006-04-12	12.1958	9.49969	-0.103088	0.273479				2006-04-12	24.8228	21.0386	6.9035	0
2006-04-13	25.1568	17.2042	1.61523	0				2006-04-13	22.0878	5.8739	-1.33285	0.0938372				2006-04-13	24.6286	23.5254	6.74271	0
2006-04-14	23.879	18.5526	6.7868	0				2006-04-14	24.3328	8.82779	-3.28708	0.00908697				2006-04-14	22.837	19.4384	7.36661	0.0166918
2006-04-15	18.9963	21.8335	9.24457	0.0493037				2006-04-15	26.0545	12.427	-0.237274	0				2006-04-15	4.6395	10.0879	4.26218	0.990005
2006-04-16	14.5222	18.6054	10.2592	4.25497				2006-04-16	25.4765	17.6806	3.87747	0				2006-04-16	23.9389	16.51	4.40762	0.000437863
2006-04-17	17.7891	18.8309	6.07687	0				2006-04-17	24.0732	21.0727	6.75919	0.0841079				2006-04-17	23.8293	19.7071	8.78503	0
2006-04-18	15.3119	13.2131	5.99765	0.489768				2006-04-18	23.6253	20.2354	5.19815	0				2006-04-18	23.8742	21.6966	8.88003	0
2006-04-19	25.4397	19.8297	6.40143	0				2006-04-19	23.4796	20.9617	7.88965	0				2006-04-19	23.3142	19.6015	8.50797	0
2006-04-20	21.9648	22.6496	10.7793	0.259086				2006-04-20	18.116	21.1689	9.03665	0				2006-04-20	17.077	15.3164	5.35657	0
2006-04-21	15.7048	18.7645	10.552	0.159275				2006-04-21	20.5188	18.4474	5.05353	0.0924115				2006-04-21	16.3081	13.1062	3.17807	0.0158734
2006-04-22	22.3354	17.6195	10.1095	0				2006-04-22	21.4883	19.098	6.70651	0				2006-04-22	25.0243	14.887	4.67615	0
2006-04-23	22.9114	22.9674	11.1065	0.0585973				2006-04-23	24.8059	17.9002	0.821716	0				2006-04-23	24.7934	12.7001	1.33301	0
2006-04-24	9.59559	13.6998	5.73755	1.19676				2006-04-24	21.655	14.3412	2.94882	0				2006-04-24	25.3387	15.3567	3.38242	0
2006-04-25	8.1578	11.4703	5.28522	0.260854				2006-04-25	25.47	23.3007	8.14352	0				2006-04-25	24.9736	15.2552	5.0831	0.0199704
2006-04-26	8.59284	13.7347	6.78653	0.448205				2006-04-26	16.0583	20.0271	10.1558	0				2006-04-26	14.1865	14.8761	5.88992	0.168825
2006-04-27	18.7103	15.2369	6.82336	0				2006-04-27	21.3305	22.2605	10.5655	0.0420795				2006-04-27	19.9045	21.1332	10.3634	0
2006-04-28	19.3261	14.9094	7.97165	0.0661859				2006-04-28	25.0822	26.6939	10.8542	0				2006-04-28	25.8372	26.3971	13.5908	0
2006-04-29	25.1823	25.2901	10.7682	0				2006-04-29	14.612	17.8911	8.32974	0.0852544				2006-04-29	26.4872	24.1241	8.52862	0
2006-04-30	24.0461	29.1625	13.9273	0				2006-04-30	19.3774	21.6644	8.85123	0.289503				2006-04-30	26.785	20.2863	10.4847	0
2006-05-01	18.7249	25.1538	13.0626	0.179805				2006-05-01	25.7642	12.1727	2.46545	0				2006-05-01	26.8703	19.8396	9.73636	0
2006-05-02	15.5648	21.0462	12.6335	0.09221				2006-05-02	27.9698	11.1134	3.04175	0				2006-05-02	26.0044	25.8459	13.8017	0
2006-05-03	23.6769	23.7113	14.6258	0.090564				2006-05-03	27.0451	16.3997	3.85757	0				2006-05-03	26.5164	29.7278	16.6719	0
2006-05-04	5.12266	17.2026	7.88419	7.73142				2006-05-04	24.8758	22.0988	8.97128	0				2006-05-04	26.5264	28.0842	14.9353	0
2006-05-05	11.6237	13.5923	8.17862	17.0688				2006-05-05	25.6942	23.7882	11.6699	0				2006-05-05	26.1702	24.9301	14.896	0
2006-05-06	23.0078	22.4049	9.56506	0.0276499				2006-05-06	26.4622	27.1113	12.4071	0				2006-05-06	24.4221	28.7313	15.7597	0.363103
2006-05-07	13.0221	17.7649	13.532	3.66772				2006-05-07	27.6181	30.0464	16.9563	0				2006-05-07	25.7153	27.267	15.0659	0.171401
2006-05-08	27.718	20.8999	11.12	0				2006-05-08	12.1844	20.5914	13.7466	0				2006-05-08	24.1606	25.9137	16.5097	0
2006-05-09	27.0724	23.3896	11.868	0				2006-05-09	26.1146	23.916	14.8923	0.0269422				2006-05-09	22.2517	23.1358	12.0988	0
2006-05-10	27.5698	26.015	14.613	0				2006-05-10	25.6986	26.563	16.3203	0.105432				2006-05-10	26.625	26.2006	14.7838	0
2006-05-11	22.6459	27.8853	15.2647	0.241559				2006-05-11	11.9818	22.4935	11.4919	0.713019				2006-05-11	25.4966	30.0006	18.6561	0.0648985
2006-05-12	26.3779	25.2144	15.6103	0				2006-05-12	17.7445	19.5795	9.06586	0.429669				2006-05-12	9.79055	15.2531	9.57523	0.136607
2006-05-13	23.6087	25.2663	15.0993	0.00647783				2006-05-13	26.6962	20.6732	11.894	0.178262				2006-05-13	21.1494	15.2385	7.2786	0.433181
2006-05-14	25.4769	28.7496	16.8767	5.68206				2006-05-14	19.4785	17.6581	9.67361	0.158181				2006-05-14	27.3738	20.0339	7.70337	0
2006-05-15	12.5845	17.2269	10.3091	0.850062				2006-05-15	27.1706	17.6425	9.63382	0				2006-05-15	27.0995	22.798	13.5133	0
2006-05-16	26.971	18.1158	7.60983	0				2006-05-16	22.9082	17.0569	7.2146	0.585496				2006-05-16	28.4048	23.5057	12.5431	0
2006-05-17	25.7687	20.474	9.08774	0.0224327				2006-05-17	28.6862	17.5403	8.6373	0				2006-05-17	26.9454	26.5655	15.6687	0.247113
2006-05-18	21.7425	20.9024	11.2995	0.0949686				2006-05-18	28.9852	21.0266	11.6973	0				2006-05-18	19.5876	25.5987	12.2437	0.174628
2006-05-19	24.6223	21.2662	11.7328	0				2006-05-19	23.2761	21.8595	12.4713	0				2006-05-19	27.9297	19.7251	9.59116	0
2006-05-20	24.7389	19.3059	11.3905	0				2006-05-20	28.6102	21.8651	12.6227	0				2006-05-20	28.1608	19.7682	11.4397	0
2006-05-21	25.6385	18.9098	10.8692	0.0458191				2006-05-21	27.9992	22.8307	12.0236	0.0177574				2006-05-21	21.3286	21.4755	9.0553	0
2006-05-22	22.4223	19.6207	11.2283	0				2006-05-22	27.9739	20.9548	12.4561	0				2006-05-22	28.4877	20.3714	9.92539	0
2006-05-23	27.9759	21.1203	12.3781	0				2006-05-23	26.3298	22.1583	12.6987	0				2006-05-23	28.7211	20.7554	11.3372	0
2006-05-24	29.5551	24.9376	14.2415	0				2006-05-24	27.6066	22.4148	13.5563	0				2006-05-24	28.7627	23.4915	14.9557	0
2006-05-25	17.5007	22.5252	13.8065	0.00956659				2006-05-25	23.0957	24.1031	14.8892	0.0375263				2006-05-25	26.9088	27.4449	13.1609	0
2006-05-26	24.6346	25.5049	15.1143	0				2006-05-26	25.1949	26.0811	16.0864	0.630032				2006-05-26	29.3351	22.685	13.108	0
2006-05-27	21.9766	27.5518	16.0096	0				2006-05-27	25.8553	26.1971	14.8534	0.126857				2006-05-27	28.8585	23.9197	13.0119	0
2006-05-28	23.2423	29.127	16.6726	0				2006-05-28	28.8831	27.7218	16.0274	0				2006-05-28	29.5116	26.6284	15.4374	0
2006-05-29	25.1553	31.0159	18.4833	0.906012				2006-05-29	27.9104	28.7746	17.9573	0.0548129				2006-05-29	28.7128	28.1104	17.3304	0
2006-05-30	13.0887	18.7377	10.5509	3.01064				2006-05-30	27.4235	30.5266	18.6362	0.100096				2006-05-30	28.759	30.5494	19.9721	0
2006-05-31	22.4345	22.3843	10.8727	0.0378793				2006-05-31	26.9478	33.3137	20.4255	0				2006-05-31	20.9926	29.588	18.4686	0
2006-06-01	29.0963	26.7669	13.869	0				2006-06-01	25.6551	29.0061	18.7903	0.0996383				2006-06-01	23.3713	27.9284	18.3546	0
2006-06-02	29.772	25.562	13.3359	0				2006-06-02	28.9977	31.2658	18.4064	0				2006-06-02	19.7472	24.3988	15.9616	0.594169
2006-06-03	30.3441	23.9373	13.2221	0				2006-06-03	27.119	33.3514	21.0023	0				2006-06-03	8.13174	20.6519	14.8037	0.445587
2006-06-04	30.3325	27.3947	15.2522	0				2006-06-04	16.5409	31.1455	21.2945	0.233104				2006-06-04	15.8692	24.9743	16.6487	0.0624057
2006-06-05	25.8202	26.1443	16.6529	0.0887184				2006-06-05	19.2635	34.3	21.2739	0.175891				2006-06-05	13.7154	28.3787	18.6225	0.526755
2006-06-06	24.8373	24.6901	16.9457	0.0612207				2006-06-06	19.4671	29.5951	17.773	0.0565671				2006-06-06	18.479	25.456	17.2335	0.326888
2006-06-07	27.8808	26.22	16.5899	0				2006-06-07	29.3412	24.2679	16.5216	0				2006-06-07	22.5956	27.6173	18.8931	0.0606355
2006-06-08	28.5109	26.9575	17.4793	0				2006-06-08	30.5233	25.7593	16.2199	0				2006-06-08	26.9196	30.7837	20.3259	0.0699183
2006-06-09	24.9967	28.9002	19.3058	0.233513				2006-06-09	30.7914	24.9967	14.2568	0				2006-06-09	28.8217	28.9037	13.7118	0
2006-06-10	23.807	28.3624	17.5962	0.0445018				2006-06-10	28.6544	26.5932	16.122	0				2006-06-10	29.364	22.0164	11.0259	0
2006-06-11	27.2213	29.2168	18.6518	0				2006-06-11	21.4444	26.6679	17.0147	0				2006-06-11	28.9188	24.5966	14.5995	0
2006-06-12	25.9491	29.8185	18.1393	0				2006-06-12	15.0519	22.4932	14.2332	2.06084				2006-06-12	26.6004	30.2886	15.7358	0.0388321
2006-06-13	28.2498	30.8642	19.3419	0				2006-06-13	9.06715	18.9313	13.7264	1.60389				2006-06-13	29.295	21.7383	13.4162	0
2006-06-14	24.1929	30.8683	20.812	0.227834				2006-06-14	15.4287	20.2065	13.9681	1.13597				2006-06-14	27.6754	23.0647	15.0741	0
2006-06-15	26.6103	31.3539	18.9691	0				2006-06-15	18.1346	20.9369	14.218	0.18064				2006-06-15	26.479	26.7555	18.1908	0
2006-06-16	20.478	26.0663	19.9816	0				2006-06-16	20.3819	21.2385	13.7787	0.540692				2006-06-16	26.3344	31.0601	18.391	0
2006-06-17	25.1591	28.3925	21.095	0				2006-06-17	27.55	24.5593	15.2038	0.51862				2006-06-17	28.3601	32.6414	21.3351	0
2006-06-18	13.0244	23.1752	19.9562	4.72335				2006-06-18	23.3556	25.9046	18.0536	0.386677				2006-06-18	28.4246	35.6108	21.6974	0
2006-06-19	23.7822	26.4611	18.7347	0.463465				2006-06-19	23.37	27.431	16.0508	0.206321				2006-06-19	20.648	34.2733	22.6242	0
2006-06-20	25.3373	31.6198	19.8536	1.35796				2006-06-20	28.1906	29.5937	16.5964	0				2006-06-20	10.2052	25.4693	18.1197	0
2006-06-21	12.1515	24.6312	17.6547	0.3482				2006-06-21	28.1484	28.1686	17.8338	0				2006-06-21	26.1775	30.0862	19.7772	0
2006-06-22	14.3586	23.4265	16.4399	0.082583				2006-06-22	29.7194	29.6062	18.1129	0				2006-06-22	27.9514	32.3314	21.3317	0
2006-06-23	14.3068	22.5841	17.2632	0.381033				2006-06-23	27.3326	32.0364	19.5978	0				2006-06-23	27.508	32.9549	21.8526	0.107122
2006-06-24	26.4322	26.9435	17.6878	0				2006-06-24	19.6135	28.6464	19.0958	0				2006-06-24	19.4385	28.286	21.0381	1.31199
2006-06-25	29.6123	30.2618	17.329	0				2006-06-25	22.5565	27.8514	19.501	0.064697				2006-06-25	28.6618	34.5926	22.5326	0
2006-06-26	28.1106	29.5258	17.8218	0				2006-06-26	19.5579	26.5589	18.504	0				2006-06-26	21.1565	28.8534	20.8925	0
2006-06-27	29.2966	28.5244	17.9995	0				2006-06-27	15.5573	25.6164	17.4579	0				2006-06-27	20.7964	28.4134	16.6216	0
2006-06-28	27.4013	29.4427	18.1633	0.161713				2006-06-28	17.5705	25.6468	17.8353	0.183016				2006-06-28	28.2064	27.2369	14.9775	0
2006-06-29	29.0571	30.0487	17.8341	0				2006-06-29	7.81119	22.5544	16.4702	9.07346				2006-06-29	29.3009	27.9325	18.0815	0
2006-06-30	27.6521	29.8552	19.2644	0				2006-06-30	26.7104	29.0988	17.1688	0				2006-06-30	27.3094	28.9615	18.9059	0
2006-07-01	24.4169	25.6659	18.5022	0.190201				2006-07-01	29.8406	31.236	18.4664	0				2006-07-01	25.5694	28.2934	19.8274	0
2006-07-02	19.9617	26.6192	18.4524	0.0348179				2006-07-02	27.1135	30.1442	20.7437	0				2006-07-02	18.0843	27.8965	17.6759	0
2006-07-03	25.3352	29.6311	19.8153	0				2006-07-03	27.1351	31.9252	21.5318	0				2006-07-03	27.8256	30.7014	20.3502	0
2006-07-04	20.9711	29.4662	21.4878	0.0479657				2006-07-04	26.1156	33.6874	21.2633	0				2006-07-04	27.7198	31.3689	21.4646	0
2006-07-05	20.3023	27.9589	22.7178	0.0707244				2006-07-05	15.8309	24.6115	16.6877	1.00435				2006-07-05	26.2306	33.3021	23.1588	0.0662156
2006-07-06	11.1078	24.0918	20.6917	6.29336				2006-07-06	28.6836	27.4314	18.1949	0				2006-07-06	27.8939	35.0508	19.6644	0
2006-07-07	25.0058	28.4476	20.6163	0.364967				2006-07-07	30.3977	28.5668	16.9122	0				2006-07-07	28.1275	33.9419	21.9529	0
2006-07-08	26.9241	31.9355	20.6908	0				2006-07-08	28.6625	23.8554	16.483	0				2006-07-08	25.7589	35.7332	22.6384	0.0265743
2006-07-09	21.2748	32.113	20.6921	1.76827				2006-07-09	28.6021	24.2811	15.8372	0				2006-07-09	20.7488	34.5226	22.2493	3.3922
2006-07-10	16.2614	22.9621	16.5098	0.465336				2006-07-10	28.5984	25.8419	16.8845	0				2006-07-10	14.3239	25.6201	19.2005	2.46607
2006-07-11	27.3967	28.6297	18.3117	0				2006-07-11	28.5497	26.4179	18.0333	0				2006-07-11	26.0862	27.0197	18.5584	1.1094
2006-07-12	28.1959	32.1852	18.6777	0				2006-07-12	28.0179	29.5236	19.3825	0				2006-07-12	27.595	30.1645	20.7499	0
2006-07-13	25.9625	30.1016	19.535	0				2006-07-13	26.4564	30.7619	20.5915	0				2006-07-13	22.519	26.8236	17.0857	0
2006-07-14	20.383	27.6124	19.5606	0				2006-07-14	19.2996	32.3956	20.7836	0				2006-07-14	13.2563	24.1341	16.8729	0.0153554
2006-07-15	28.8812	31.9996	20.6738	0				2006-07-15	17.0563	31.5185	21.582	0.359455				2006-07-15	11.2998	24.6337	17.228	1.33035
2006-07-16	27.7322	30.3685	18.8946	0				2006-07-16	22.3136	30.7072	22.9606	3.13833				2006-07-16	18.3361	24.0811	18.2886	0
2006-07-17	24.5918	29.959	20.853	0				2006-07-17	21.0718	29.2494	21.1512	1.9381				2006-07-17	27.8982	28.8662	16.7921	0
2006-07-18	25.6865	29.5859	21.0819	0.432644				2006-07-18	27.6723	33.7335	22.1693	0.0552336				2006-07-18	23.6964	28.3206	19.684	0
2006-07-19	26.6444	29.676	22.0927	0				2006-07-19	27.1903	33.1029	20.8541	0				2006-07-19	26.5724	29.7829	19.574	0
2006-07-20	24.6788	31.0985	23.1537	0.561268				2006-07-20	24.8033	28.8191	19.3687	0				2006-07-20	28.1359	32.652	20.8685	0
2006-07-21	21.4711	28.1764	21.4998	2.07929				2006-07-21	23.4859	27.7017	19.3314	0				2006-07-21	27.6856	32.8809	20.6207	0
2006-07-22	23.3412	29.267	21.8539	0.454319				2006-07-22	16.1449	28.333	19.894	0				2006-07-22	19.7849	29.2452	20.1361	0
2006-07-23	19.5814	25.831	20.7546	1.72909				2006-07-23	13.7879	25.7046	20.0865	4.0769				2006-07-23	22.9145	30.2189	20.7785	1.21806
2006-07-24	26.4673	30.0262	21.2146	0.121429				2006-07-24	13.0919	25.375	17.039	4.83777				2006-07-24	18.8582	29.4188	18.5153	2.26162
2006-07-25	26.8557	30.5904	21.7906	0				2006-07-25	25.8382	29.1516	17.5867	0.674497				2006-07-25	15.1066	23.3526	16.6063	11.1545
2006-07-26	24.3691	30.3901	22.3397	0				2006-07-26	8.13371	25.8591	17.884	0.130814				2006-07-26	26.1019	27.1496	19.1437	0
2006-07-27	11.6569	25.5873	21.9783	5.40682				2006-07-27	24.7484	27.6546	14.4488	0				2006-07-27	27.2565	30.8476	19.7547	0
2006-07-28	13.0615	28.2233	21.7933	11.6055				2006-07-28	1.75291	16.4679	12.7894	0.0116248				2006-07-28	27.2223	32.603	20.3745	0
2006-07-29	19.4732	27.5801	21.2547	0				2006-07-29	13.4792	20.3084	13.9665	0.0638027				2006-07-29	27.8737	32.8077	20.5712	0
2006-07-30	25.7725	31.7171	22.5388	0				2006-07-30	22.7297	24.4349	14.2828	0				2006-07-30	28.0296	31.8689	18.2628	0
2006-07-31	15.7822	29.7969	23.0964	0.678822				2006-07-31	25.8305	26.8068	14.7344	0				2006-07-31	28.3388	33.2378	18.722	0
2006-08-01	13.7625	30.8328	17.9229	0.070709				2006-08-01	26.6365	29.3431	18.2907	0				2006-08-01	27.1342	34.1692	20.5256	0
2006-08-02	20.9006	30.9835	18.1371	0				2006-08-02	20.8286	26.4641	18.2441	0				2006-08-02	24.079	34.0754	22.7898	0
2006-08-03	21.0696	29.7644	19.5366	0				2006-08-03	21.6903	27.1642	19.1235	0				2006-08-03	13.7114	29.9908	22.137	0
2006-08-04	26.8583	30.2061	20.2706	0				2006-08-04	19.0321	28.2028	19.0267	0.603161				2006-08-04	25.5746	32.7811	21.5739	0.0897853
2006-08-05	25.4986	29.7444	18.269	0				2006-08-05	11.7605	24.6763	18.0197	1.34852				2006-08-05	8.10189	25.5558	18.9765	0.0958377
2006-08-06	25.7153	29.4952	19.1139	0.218187				2006-08-06	24.4696	27.8855	18.0828	0.419071				2006-08-06	21.0401	28.2881	18.6237	0.557623
2006-08-07	23.6479	28.984	19.2977	0				2006-08-07	25.1029	31.508	21.4521	0				2006-08-07	7.00331	19.8567	15.6872	6.36774
2006-08-08	23.7126	30.2146	20.4041	0.0361816				2006-08-08	24.8432	31.5031	20.938	0				2006-08-08	15.5468	23.5532	15.934	0.0688846
2006-08-09	18.2902	31.4394	22.1773	0.285384				2006-08-09	24.2933	31.4903	20.8179	0				2006-08-09	22.2196	29.1293	18.1411	0
2006-08-10	24.7729	35.0299	22.7474	0.138607				2006-08-10	23.5942	31.7131	21.4948	0.73952				2006-08-10	22.2379	28.5679	17.9886	0
2006-08-11	22.1623	32.8657	22.4697	0.0522258				2006-08-11	6.40419	24.5947	16.8109	13.0942				2006-08-11	25.8513	28.6763	17.4676	0
2006-08-12	21.0779	33.9746	22.6101	0				2006-08-12	5.80013	18.6086	14.5907	4.63206				2006-08-12	24.9149	28.1129	19.1245	0.118395
2006-08-13	16.8449	30.4418	18.6532	3.70065				2006-08-13	19.9151	23.1328	14.8899	0.429806				2006-08-13	25.4345	30.5078	18.9315	0
2006-08-14	16.4269	24.1653	15.0705	0.122332				2006-08-14	25.2313	26.3051	15.499	0.302634				2006-08-14	23.5834	32.0601	21.2319	0.342147
2006-08-15	20.1104	22.1675	14.9655	0.630511				2006-08-15	26.8449	29.1691	18.445	0				2006-08-15	24.6155	32.3719	21.2795	0.0954588
2006-08-16	21.0751	23.7715	15.4439	0.0754758				2006-08-16	24.7557	31.3501	19.6591	0				2006-08-16	23.6832	31.6294	19.2244	0
2006-08-17	20.2531	24.697	16.0422	0.12941				2006-08-17	19.286	29.6243	18.8406	0				2006-08-17	24.1974	31.519	20.3957	0
2006-08-18	22.7614	26.7517	17.1095	0.0411497				2006-08-18	24.3083	29.249	15.8856	0				2006-08-18	14.5404	29.6574	19.967	0.984192
2006-08-19	13.5458	22.8426	17.0689	2.69789				2006-08-19	13.9245	25.9792	17.2579	0.131758				2006-08-19	20.9063	29.6555	16.5502	0.0126334
2006-08-20	12.916	21.7574	14.9884	0.0227839				2006-08-20	12.4642	25.1761	17.4527	1.32493				2006-08-20	25.3759	27.9293	13.6888	0
2006-08-21	18.507	24.9389	16.1107	0.326056				2006-08-21	25.5137	26.7083	16.8529	0.103275				2006-08-21	25.6605	29.3505	17.5274	0
2006-08-22	17.723	24.3415	16.297	0.25866				2006-08-22	21.5781	30.3831	17.8601	0				2006-08-22	19.1927	28.8818	17.714	0
2006-08-23	24.6844	26.8404	17.1761	0.180808				2006-08-23	16.254	21.6806	16.5038	5.04639				2006-08-23	18.662	26.7322	17.366	0.149718
2006-08-24	22.1534	28.3707	18.0622	0.322508				2006-08-24	10.9299	21.108	14.325	1.61023				2006-08-24	19.4983	28.0333	17.7783	0.0109351
2006-08-25	7.15186	24.1832	17.0218	3.64823				2006-08-25	15.9636	21.4863	13.3542	1.90155				2006-08-25	12.0812	24.898	15.6314	0.259847
2006-08-26	19.4082	26.0281	17.8245	4.30537				2006-08-26	25.055	23.8238	14.4975	0				2006-08-26	23.6078	27.2246	15.3685	0
2006-08-27	18.7986	22.5596	15.7195	0.471908				2006-08-27	25.2041	27.7761	14.7725	0.138279				2006-08-27	23.7455	26.2171	14.9452	0
2006-08-28	21.9356	25.5741	16.0085	0				2006-08-28	23.4728	27.6556	16.8116	0				2006-08-28	21.506	25.747	14.8374	0
2006-08-29	20.3043	27.5945	17.0366	0.0388283				2006-08-29	12.7063	25.6529	15.5254	0				2006-08-29	22.8031	27.7379	16.9916	0
2006-08-30	7.25129	21.6572	15.5871	0.819912				2006-08-30	22.0807	26.7305	13.1526	0				2006-08-30	22.8693	29.5318	16.2904	0
2006-08-31	21.7326	25.736	13.8662	0				2006-08-31	22.8866	25.8935	14.6171	0				2006-08-31	22.5355	30.1615	16.3642	0
2006-09-01	15.0926	21.4786	13.0361	0.830909				2006-09-01	21.9897	23.9778	15.7928	0				2006-09-01	22.8029	28.1688	16.2882	0
2006-09-02	19.8658	21.9351	13.7941	0.270954				2006-09-02	16.6408	23.7192	13.4898	0				2006-09-02	21.3287	28.3001	17.4229	0.514149
2006-09-03	20.8845	23.874	14.6828	0				2006-09-03	21.2951	25.5671	15.3302	0.106793				2006-09-03	21.1267	31.6298	16.3061	0
2006-09-04	20.8956	25.2953	15.1469	0				2006-09-04	17.3742	26.6389	16.644	0.0647267				2006-09-04	22.4327	31.7631	18.5291	0
2006-09-05	18.7335	26.967	16.4263	0.0621408				2006-09-05	9.97309	23.722	14.9649	0				2006-09-05	23.0934	33.347	17.541	0
2006-09-06	16.8227	26.0879	16.6166	0				2006-09-06	22.2677	26.2574	15.8441	0				2006-09-06	21.9511	36.3373	17.7055	0
2006-09-07	17.6098	25.1666	16.8286	0				2006-09-07	20.5722	29.5405	16.655	0.409255				2006-09-07	22.3356	36.1975	18.4789	0
2006-09-08	13.5932	24.7271	15.4705	0.0223258				2006-09-08	19.3763	26.2049	14.1106	0.473506				2006-09-08	21.0895	38.5579	15.8786	0
2006-09-09	18.0058	25.836	15.7231	0.00990295				2006-09-09	20.9094	19.8123	13.1822	0				2006-09-09	19.7712	29.2574	16.9959	0.0231483
2006-09-10	10.3661	23.2277	16.0522	0.295161				2006-09-10	21.769	20.8989	12.3924	0				2006-09-10	15.3673	25.125	15.7587	0.136333
2006-09-11	8.61135	22.5727	15.5326	0.104659				2006-09-11	21.8614	21.9927	11.727	0				2006-09-11	11.6911	27.6337	16.0326	0.289417
2006-09-12	17.5056	28.195	15.5998	0.0377309				2006-09-12	17.8659	21.0701	12.1599	0				2006-09-12	11.692	22.6812	16.9237	9.82654
2006-09-13	17.7735	28.56	15.7639	0.334728				2006-09-13	15.4604	24.2654	12.9048	0				2006-09-13	19.8844	24.7541	11.754	0
2006-09-14	18.7789	29.4258	16.0094	0				2006-09-14	8.88422	22.5074	13.6486	0.449008				2006-09-14	19.2791	22.6778	13.1757	0
2006-09-15	18.0858	29.7396	16.4514	0.0543232				2006-09-15	13.0616	25.2034	13.9978	1.51875				2006-09-15	16.9723	22.5486	13.1331	0.00205557
2006-09-16	8.25681	23.5043	12.4975	0.50807				2006-09-16	17.5517	25.6051	15.1516	0.19458				2006-09-16	10.7802	20.6028	12.9192	0.137399
2006-09-17	16.1316	24.5769	13.2772	0				2006-09-17	12.731	25.449	15.9389	1.02655				2006-09-17	6.95196	23.4383	13.898	2.6347
2006-09-18	18.336	25.2705	13.2396	0.121636				2006-09-18	5.46326	19.5976	12.8535	12.266				2006-09-18	7.14946	19.3954	12.4743	1.53134
2006-09-19	14.0599	24.1864	14.4802	0.0512416				2006-09-19	13.9571	20.5182	11.5219	0.124549				2006-09-19	7.23279	15.0479	8.79752	0.996502
2006-09-20	19.9331	26.603	12.7623	0				2006-09-20	7.19887	17.788	8.89233	0.277382				2006-09-20	9.48577	15.1645	6.25043	1.71594
2006-09-21	19.996	29.9372	12.6601	0				2006-09-21	19.5508	23.4628	11.9938	0.0590109				2006-09-21	10.3396	17.9279	8.19989	0.0413519
2006-09-22	6.36805	19.587	10.8233	0.163701				2006-09-22	12.2062	23.4199	12.8116	0.0408282				2006-09-22	17.3642	19.926	9.48911	0
2006-09-23	15.9594	20.7482	10.0584	0.172252				2006-09-23	14.8061	23.4426	13.4453	0.0556893				2006-09-23	19.3693	22.673	9.5141	0
2006-09-24	2.77112	18.8885	12.8447	0.735737				2006-09-24	4.61917	21.2278	11.5276	0.229663				2006-09-24	19.5619	25.1504	10.763	0
2006-09-25	8.92338	22.887	10.1646	1.1789				2006-09-25	7.34823	16.7371	7.31708	1.15169				2006-09-25	19.3099	24.9821	12.3134	0
2006-09-26	18.1008	20.8651	9.59515	0.0739312				2006-09-26	5.41591	14.322	5.48416	0.841111				2006-09-26	18.8545	26.0334	12.9336	0
2006-09-27	17.9348	23.6029	12.3186	0.131146				2006-09-27	17.4667	19.0358	8.02969	0.122475				2006-09-27	17.8925	28.6362	13.3927	0
2006-09-28	15.3076	23.5767	13.6082	0.0588103				2006-09-28	10.4521	20.2865	9.68024	0.294496				2006-09-28	18.4717	25.7539	14.577	5.97021
2006-09-29	12.8288	22.1504	13.5388	0.0333791				2006-09-29	15.932	19.4272	7.48639	0.203242				2006-09-29	9.5522	21.3403	9.71017	1.26983
2006-09-30	14.0151	23.1848	7.96606	3.22183				2006-09-30	17.3555	23.5056	8.67032	0.208962				2006-09-30	17.3652	20.135	7.36212	0
2006-10-01	6.76446	14.8368	3.29169	0.111357				2006-10-01	16.6906	24.2322	9.16483	0				2006-10-01	18.4507	21.7273	8.73813	0
2006-10-02	17.7735	13.8617	2.52197	0				2006-10-02	16.761	21.9795	11.767	0.0363594				2006-10-02	18.4273	23.6251	7.46588	0
2006-10-03	17.0298	18.3008	2.98456	0				2006-10-03	17.0753	24.9253	9.90628	0.0699673				2006-10-03	18.3835	24.7769	9.66119	0
2006-10-04	19.3112	17.0958	2.79379	0				2006-10-04	15.5692	19.9016	9.42416	0.276531				2006-10-04	17.4847	17.8035	5.91257	0
2006-10-05	18.4513	19.9289	2.32852	0				2006-10-05	8.71972	14.7462	4.72928	0.232665				2006-10-05	17.5638	23.0397	8.78036	0
2006-10-06	17.3079	22.4992	4.74741	0				2006-10-06	16.947	19.4607	6.16278	0.0230045				2006-10-06	17.0485	22.8804	11.3014	0.0171314
2006-10-07	16.3506	23.7622	8.94299	0.0226944				2006-10-07	16.302	24.9825	8.16879	0				2006-10-07	15.0972	22.0902	10.7457	0.0490231
2006-10-08	17.36	19.7183	7.78604	0				2006-10-08	11.9953	18.5703	8.08514	0.0102268				2006-10-08	14.3234	23.5456	6.62472	0.554889
2006-10-09	17.1228	20.5205	7.01901	0				2006-10-09	6.93752	14.0068	4.07706	10.7817				2006-10-09	16.8991	14.3236	3.08487	0.0647195
2006-10-10	14.8847	18.6032	6.5723	0				2006-10-10	9.51131	17.245	7.08334	0.389709				2006-10-10	13.7323	12.7081	3.86392	0.0307652
2006-10-11	16.7267	22.1524	6.14273	0.0544409				2006-10-11	14.8217	16.8367	6.62411	0.00824586				2006-10-11	15.9133	15.8354	4.64395	0
2006-10-12	14.3334	23.4562	10.6767	0				2006-10-12	5.84706	12.9929	6.3844	3.57425				2006-10-12	16.5702	14.5643	4.34134	0
2006-10-13	14.7137	21.6866	9.67938	0				2006-10-13	3.88943	12.3087	4.28073	0.340872				2006-10-13	16.0164	16.5616	3.76254	0
2006-10-14	13.9061	18.6972	5.1788	0				2006-10-14	6.62638	14.8375	3.58518	1.01983				2006-10-14	15.9388	17.336	3.79382	0
2006-10-15	15.0255	17.2636	4.52643	0				2006-10-15	9.89883	14.9523	4.17441	0.154132				2006-10-15	15.1469	20.2935	6.07138	0
2006-10-16	13.5961	17.9085	4.75644	0				2006-10-16	14.7363	18.8137	2.5806	0				2006-10-16	15.6512	16.4298	1.64847	0
2006-10-17	14.4312	18.2058	3.60229	0.0256786				2006-10-17	12.3307	12.9068	1.47736	2.75475				2006-10-17	15.8952	16.5046	3.18137	0
2006-10-18	12.0097	16.1765	4.42465	0				2006-10-18	5.46245	4.85635	-3.30637	1.82683				2006-10-18	14.8708	16.1817	3.50949	0
2006-10-19	13.563	16.8754	3.65665	0				2006-10-19	14.2585	8.33951	-3.85632	0.0466801				2006-10-19	15.3279	20.3974	5.99972	0
2006-10-20	14.5591	12.7987	0.490662	0				2006-10-20	5.82297	10.4394	1.39792	0.721495				2006-10-20	15.1767	21.7707	6.61883	0
2006-10-21	14.366	19.1356	0.417572	0.00632113				2006-10-21	10.0479	11.3562	0.318146	0.320584				2006-10-21	10.3235	17.9436	7.99063	4.70892
2006-10-22	10.6154	13.1519	2.04553	0.0330433				2006-10-22	14.3814	16.7282	2.64432	0				2006-10-22	6.21065	12.8304	4.15903	0.384586
2006-10-23	14.6115	10.6708	-1.50998	0				2006-10-23	10.2062	15.4984	4.61404	0				2006-10-23	9.54398	15.8189	1.78458	0.0579153
2006-10-24	14.5157	14.9009	-2.27155	0				2006-10-24	13.8746	17.8809	3.08649	0.0141539				2006-10-24	13.9071	20.3304	4.3176	0
2006-10-25	13.4611	18.3151	5.24799	0.038805				2006-10-25	13.9403	15.1699	4.22528	0				2006-10-25	13.9852	18.3112	5.84399	0
2006-10-26	11.2902	17.4102	7.20731	0.277851				2006-10-26	7.5522	15.5449	2.9989	0.31905				2006-10-26	14.0542	17.612	7.64395	0
2006-10-27	12.0271	15.7767	4.9653	0.0124287				2006-10-27	14.0553	14.4928	3.07004	0.0323654				2006-10-27	10.7022	18.3907	2.28854	0
2006-10-28	12.6655	17.6583	5.60208	0				2006-10-28	13.9153	11.2505	-0.973083	0				2006-10-28	12.954	13.3727	-4.95383	0
2006-10-29	13.1659	21.7661	4.58447	0.0529408				2006-10-29	8.39164	12.6039	-0.945557	0.0405687				2006-10-29	13.5397	14.7381	0.353027	0
2006-10-30	2.48028	11.5336	2.02539	4.21735				2006-10-30	13.2993	16.8876	2.6438	0				2006-10-30	13.1605	14.053	0.929657	0.0197945
2006-10-31	6.60021	7.96603	-2.34683	0				2006-10-31	12.434	15.6331	3.54556	0.217008				2006-10-31	12.8829	15.6817	4.39194	0.0408625
2006-11-01	13.1357	12.1448	-2.897	0				2006-11-01	7.47553	14.0516	4.02219	0.0961053				2006-11-01	11.6022	17.4993	4.59253	0
2006-11-02	12.9757	16.4935	-1.50745	0.0194362				2006-11-02	12.8284	16.3906	0.909637	0				2006-11-02	12.6041	14.9243	0.946777	0.0197949
2006-11-03	11.7503	13.2067	-0.459015	0.0135963				2006-11-03	7.40337	13.4366	1.79523	0				2006-11-03	10.7435	10.4839	-1.75623	0.0309457
2006-11-04	12.3206	11.6486	-2.42349	0				2006-11-04	11.5025	15.5416	2.08789	0				2006-11-04	12.5151	13.9171	-0.972717	0
2006-11-05	11.7757	9.93112	-3.38647	0				2006-11-05	10.6282	15.1477	2.82446	0				2006-11-05	12.5861	17.9574	2.74231	0
2006-11-06	8.79142	11.2046	-1.52069	0				2006-11-06	11.4309	16.1816	2.06763	0				2006-11-06	4.1699	15.8817	3.11069	0
2006-11-07	9.71577	6.69574	-2.19815	0.0619986				2006-11-07	11.4768	16.0521	2.96231	0				2006-11-07	5.29847	9.04227	0.411346	1.05783
2006-11-08	12.2075	9.194	-2.2724	0				2006-11-08	11.3967	13.2253	0.0865173	0				2006-11-08	10.4798	10.2826	-0.628052	0
2006-11-09	12.2726	10.829	-1.43661	0				2006-11-09	11.7645	9.03476	-0.437408	0				2006-11-09	11.9821	6.87552	-1.99167	0
2006-11-10	10.2718	11.1064	-0.0847778	0				2006-11-10	11.4057	12.3002	0.349213	0				2006-11-10	12.1961	8.95267	-1.21793	0
2006-11-11	9.67337	10.6476	-4.33072	0.770897				2006-11-11	8.19471	10.8943	-1.60043	0				2006-11-11	12.16	15.2303	1.43298	0
2006-11-12	10.8464	0.770966	-8.03275	0				2006-11-12	11.2608	13.2247	0.779602	0				2006-11-12	8.15448	8.80142	-2.42889	0
2006-11-13	11.3811	2.42306	-4.55881	0				2006-11-13	10.2569	6.79056	1.11325	0.0258209				2006-11-13	11.3978	5.55008	-3.48898	0
2006-11-14	11.0214	1.46231	-4.14014	0				2006-11-14	4.98359	6.41736	-2.47372	0.0713815				2006-11-14	11.3909	9.18335	-1.32153	0
2006-11-15	9.77177	4.23608	-3.95715	0				2006-11-15	9.91257	5.0806	-1.68253	0				2006-11-15	10.3439	14.2114	1.87491	0
2006-11-16	10.1271	5.93686	-2.01367	0				2006-11-16	5.08841	7.76672	-3.42563	0.0643342				2006-11-16	10.4579	3.67456	-4.7663	0
2006-11-17	10.6752	5.74747	-2.03882	0				2006-11-17	9.32905	6.39682	-2.27609	0				2006-11-17	10.5607	2.59799	-4.92844	0
2006-11-18	10.821	8.51669	-1.20947	0				2006-11-18	4.27103	7.43289	-1.50671	0				2006-11-18	5.33458	5.60321	-2.83984	0
2006-11-19	10.5265	7.091	-1.94321	0				2006-11-19	10.505	11.6386	-0.76178	0				2006-11-19	10.4084	14.0479	0.957367	0
2006-11-20	10.1465	8.72934	-2.6962	0				2006-11-20	9.05421	8.86511	-1.33743	0				2006-11-20	7.38437	10.5037	-0.710968	0.0235394
2006-11-21	9.74976	9.41635	-0.949707	0				2006-11-21	8.48281	8.27402	-1.69266	0				2006-11-21	8.31534	5.17099	-3.26129	0.0181921
2006-11-22	9.05154	6.02725	-2.71826	0				2006-11-22	2.72582	7.84848	-0.764252	0.0175991				2006-11-22	8.87523	1.8703	-5.66718	0
2006-11-23	9.51665	2.3204	-3.52811	0.0793711				2006-11-23	9.62464	11.2503	-1.34454	0				2006-11-23	10.1803	0.810028	-7.44614	0
2006-11-24	9.98176	1.86719	-4.04504	0				2006-11-24	7.6661	6.26706	-0.986175	0.0876275				2006-11-24	9.69386	1.08026	-6.75574	0
2006-11-25	9.64981	3.23587	-3.38769	0				2006-11-25	5.55506	2.61874	-4.63004	0.00922544				2006-11-25	9.09494	3.22995	-4.59329	0
2006-11-26	9.98554	3.20938	-3.48111	0				2006-11-26	9.92243	5.2645	-3.49222	0				2006-11-26	6.18347	1.42331	-6.4986	0.0270269
2006-11-27	10.1272	3.74942	-3.40774	0				2006-11-27	9.98873	5.24982	-4.51328	0				2006-11-27	9.693	-0.100861	-7.65332	0
2006-11-28	9.5355	6.72321	-3.91977	0				2006-11-28	8.676	2.74451	-7.12424	0				2006-11-28	9.66165	-0.851562	-8.15451	0
2006-11-29	7.63845	6.16168	-3.90161	0.00832255				2006-11-29	8.9422	-1.36667	-9.67923	0				2006-11-29	9.61165	2.07889	-6.82217	0
2006-11-30	9.44823	3.79596	-4.29272	0				2006-11-30	9.11488	-2.12384	-14.1314	0				2006-11-30	9.45763	1.31735	-9.31293	0
2006-12-01	8.39547	6.38937	-3.15204	0				2006-12-01	9.6821	-3.6608	-12.6505	0				2006-12-01	9.46562	1.62216	-8.13892	0
2006-12-02	8.66614	11.8621	-1.43942	0				2006-12-02	9.73948	-1.32358	-12.0506	0				2006-12-02	9.27676	1.3429	-8.39157	0
2006-12-03	8.3363	13.0041	-2.22858	0				2006-12-03	9.26776	-2.23099	-10.1439	0				2006-12-03	9.22005	0.88266	-7.3208	0
2006-12-04	8.23901	13.9732	-1.91367	0				2006-12-04	6.14342	-0.832733	-9.70648	0				2006-12-04	9.67195	3.20407	-6.84598	0
2006-12-05	6.98847	6.47638	-7.83606	0.232497				2006-12-05	9.27118	-2.55435	-11.4534	0				2006-12-05	8.98245	4.05771	-5.16864	0.00695805
2006-12-06	5.27567	-7.0538	-15.7354	0				2006-12-06	8.16281	-0.57547	-9.02087	0				2006-12-06	3.13362	-1.21011	-10.8552	0
2006-12-07	7.92329	-4.17142	-15.8772	0				2006-12-07	9.17613	-0.297638	-8.96262	0				2006-12-07	8.81233	2.04276	-9.83926	0
2006-12-08	7.89857	-0.624359	-12.6462	0				2006-12-08	9.08239	2.3132	-6.97031	0				2006-12-08	8.6615	7.32816	-3.79785	0
2006-12-09	8.80884	6.27319	-8.6506	0				2006-12-09	7.85777	4.6673	-5.05002	0.00894403				2006-12-09	4.73214	-4.42477	-13.144	0.0382309
2006-12-10	6.88168	2.85861	-5.65665	0				2006-12-10	9.11679	5.35941	-6.81632	0				2006-12-10	5.676	-9.62686	-16.415	0.0597524
2006-12-11	6.89391	0.332825	-10.8477	0.225974				2006-12-11	8.43734	3.53958	-5.78958	0				2006-12-11	6.41631	0.697144	-11.3351	0.0514332
2006-12-12	3.8838	-6.77628	-12.9634	0				2006-12-12	8.48718	3.25388	-5.21008	0				2006-12-12	8.52377	2.76776	-5.74118	0
2006-12-13	8.72182	-7.11221	-13.8281	0				2006-12-13	8.15389	0.270599	-8.49417	0				2006-12-13	5.16409	-1.66141	-10.1547	0
2006-12-14	9.41501	-7.48911	-15.1816	0				2006-12-14	8.64357	2.94376	-8.65442	0				2006-12-14	8.63914	-0.172028	-10.6037	0
2006-12-15	9.20106	-6.45993	-14.2992	0				2006-12-15	8.62822	1.37534	-7.67258	0				2006-12-15	8.88752	2.91458	-8.24606	0
2006-12-16	8.6322	-4.93625	-14.5778	0				2006-12-16	6.56986	2.63437	-9.22818	0				2006-12-16	8.49726	1.63956	-8.3313	0
2006-12-17	9.23659	-5.71793	-14.6031	0				2006-12-17	8.3111	0.00915527	-9.35523	0				2006-12-17	7.79201	2.05948	-8.83054	0
2006-12-18	8.9607	-5.2244	-15.4348	0				2006-12-18	5.82809	2.46524	-10.0061	0.0749654				2006-12-18	6.99718	-1.883	-16.503	0
2006-12-19	8.90476	-3.37115	-15.8672	0				2006-12-19	5.32679	-9.12302	-17.1368	0				2006-12-19	8.65673	-5.55203	-17.2559	0
2006-12-20	8.40801	-0.9151	-14.4616	0				2006-12-20	8.28462	-10.763	-20.0927	0				2006-12-20	5.89658	0.71579	-7.19565	0.00631783
2006-12-21	8.07617	0.0292053	-13.6882	0				2006-12-21	9.0132	-10.0884	-21.1479	0				2006-12-21	8.37711	4.62503	-6.4144	0.0237101
2006-12-22	8.66089	-1.8446	-13.8955	0				2006-12-22	9.34551	-11.0325	-20.226	0				2006-12-22	5.68445	-3.76953	-16.076	0.0916207
2006-12-23	8.82864	-8.08185	-15.5146	0				2006-12-23	9.47649	-8.21149	-19.5109	0				2006-12-23	7.8055	-10.3808	-18.9635	0
2006-12-24	7.44097	-8.57101	-16.0864	0				2006-12-24	7.45032	-5.80273	-14.671	0				2006-12-24	7.91427	-10.8443	-19.661	0
2006-12-25	8.72928	-6.84634	-15.4908	0				2006-12-25	8.61967	-2.06171	-12.196	0				2006-12-25	8.70068	-4.79477	-16.0589	0
2006-12-26	8.26761	-0.210144	-14.0825	0				2006-12-26	8.78471	0.570404	-10.565	0				2006-12-26	8.42745	-1.26364	-12.6673	0
2006-12-27	7.51089	-0.781036	-11.7528	0				2006-12-27	5.42995	0.17514	-9.8067	0				2006-12-27	9.08678	-0.146759	-11.4129	0
2006-12-28	8.67231	-2.08933	-12.728	0				2006-12-28	8.57924	0.968994	-9.65305	0				2006-12-28	9.05543	1.31436	-11.2109	0
2006-12-29	8.85167	1.02963	-12.8343	0				2006-12-29	8.92676	1.49368	-10.5502	0				2006-12-29	8.50139	2.07675	-9.29239	0
2006-12-30	8.63983	1.63855	-10.7356	0				2006-12-30	8.53752	4.32767	-6.74268	0				2006-12-30	5.13161	-0.677979	-9.47882	0
2006-12-31	8.55147	3.72043	-8.62982	0				2006-12-31	6.56837	4.99802	-6.32306	0				2006-12-31	2.88275	0.103699	-10.9725	0
2007-01-01	7.87913	2.39529	-7.02524	0				2007-01-01	6.89418	2.4147	-9.58911	0				2007-01-01	7.57246	5.29364	-6.10672	0
2007-01-02	6.37845	3.20581	-8.10968	0				2007-01-02	7.80926	-0.423737	-10.7203	0				2007-01-02	6.77553	-0.0414429	-8.72394	0
2007-01-03	7.92828	6.3414	-5.0155	0				2007-01-03	8.73273	2.91299	-8.78351	0				2007-01-03	4.76629	-5.08066	-14.2956	0
2007-01-04	7.82055	6.5899	-4.99741	0				2007-01-04	7.85498	3.25317	-8.52859	0				2007-01-04	9.18817	-5.66293	-15.2607	0
2007-01-05	7.53572	5.19821	-2.84869	0				2007-01-05	0.225923	-1.35587	-12.3746	0.232682				2007-01-05	7.96468	-1.89792	-13.9062	0
2007-01-06	6.87932	4.99197	-1.78421	0				2007-01-06	9.07972	-7.00232	-15.5961	0				2007-01-06	8.23426	-5.84521	-16.5276	0
2007-01-07	6.11277	2.74792	-4.36774	0				2007-01-07	8.7907	-4.9603	-14.8137	0				2007-01-07	9.20065	-7.79398	-18.0769	0
2007-01-08	2.56954	-0.979492	-11.0846	0				2007-01-08	8.04212	-1.41553	-13.3907	0				2007-01-08	8.11774	-6.14395	-17.1072	0
2007-01-09	9.62579	-3.68753	-12.9359	0				2007-01-09	8.73571	-0.432739	-11.5497	0				2007-01-09	9.71776	-4.95102	-15.8349	0
2007-01-10	8.30807	-3.75394	-14.4676	0				2007-01-10	9.15891	-2.67642	-12.2185	0				2007-01-10	9.27954	-3.93372	-15.5249	0
2007-01-11	8.9914	-3.78369	-15.0815	0				2007-01-11	6.52667	-1.27194	-11.5853	0				2007-01-11	9.23504	-2.69955	-14.5768	0
2007-01-12	5.29417	-3.08582	-12.9739	0				2007-01-12	9.63026	2.92398	-8.84598	0				2007-01-12	8.6551	0.74704	-12.3087	0
2007-01-13	9.17335	-0.457306	-13.8955	0				2007-01-13	8.9499	1.06876	-9.06769	0				2007-01-13	8.04897	-0.223816	-12.3427	0
2007-01-14	9.08723	-1.81781	-13.2808	0				2007-01-14	6.1328	-2.32941	-11.7088	2.1825				2007-01-14	7.10639	-1.70349	-13.0121	0
2007-01-15	9.65633	-0.662842	-14.3412	0				2007-01-15	2.42363	-6.4696	-16.1117	0				2007-01-15	10.1116	-0.225861	-12.4394	0
2007-01-16	8.11642	-4.01144	-14.1111	0				2007-01-16	9.77435	-7.45526	-17.4565	0				2007-01-16	6.54157	-0.404297	-11.756	0
2007-01-17	8.38133	-7.89386	-14.247	0.00752579				2007-01-17	10.1557	-9.35135	-19.9393	0				2007-01-17	9.81468	-2.10883	-12.3258	0
2007-01-18	9.81133	-8.97296	-17.5737	0				2007-01-18	6.18121	-10.1401	-21.6222	4.88253				2007-01-18	10.4593	-0.398071	-11.6838	0
2007-01-19	10.7134	-3.61121	-18.6778	0				2007-01-19	5.74855	-6.61264	-17.3524	1.27368				2007-01-19	10.2071	-0.977631	-12.334	0
2007-01-20	8.7685	-0.979279	-14.2834	0				2007-01-20	9.29792	-3.66449	-15.5103	0				2007-01-20	10.4932	-1.51617	-12.6904	0
2007-01-21	9.97537	-4.65826	-15.4701	0				2007-01-21	6.00357	-2.03766	-11.8766	0				2007-01-21	4.05783	1.62589	-10.0844	0
2007-01-22	11.031	-5.44949	-17.057	0				2007-01-22	8.2078	-3.90918	-12.313	0				2007-01-22	9.88197	1.3497	-10.5735	0
2007-01-23	10.9621	-3.62653	-15.6133	0				2007-01-23	10.303	-5.78177	-16.8439	0				2007-01-23	8.70756	2.42712	-9.453	0
2007-01-24	10.5099	-2.09695	-15.2477	0				2007-01-24	5.46256	-1.62472	-13.8675	0				2007-01-24	10.0126	3.77139	-8.22015	0
2007-01-25	10.4415	0.454498	-11.9933	0				2007-01-25	7.28279	-4.30936	-12.8706	0				2007-01-25	7.20542	1.09878	-9.32114	0
2007-01-26	10.2535	-0.593689	-11.2452	0				2007-01-26	7.16982	-6.31558	-17.6488	0				2007-01-26	10.5611	-0.488281	-11.7317	0
2007-01-27	8.30878	-3.43198	-12.8695	0				2007-01-27	10.5184	-10.8328	-20.5743	0.0439843				2007-01-27	9.8326	-0.169891	-12.2408	0
2007-01-28	8.23836	-6.72415	-15.9764	0.0373198				2007-01-28	10.7848	-9.75558	-19.5901	0.0114084				2007-01-28	4.48196	-0.214447	-10.5146	0.0118172
2007-01-29	9.30346	-8.08166	-17.2305	0				2007-01-29	9.33087	-10.9354	-19.501	0				2007-01-29	5.8445	-1.483	-12.0933	0.00963789
2007-01-30	12.0639	-4.04068	-16.9606	0				2007-01-30	11.0914	-8.62912	-18.5494	0				2007-01-30	10.1326	-3.39432	-14.1197	0
2007-01-31	8.06251	-3.28781	-15.6084	0				2007-01-31	11.4274	-6.91815	-17.8175	0				2007-01-31	12.0023	-2.8685	-13.9943	0
2007-02-01	11.5475	-1.80148	-13.6938	0				2007-02-01	11.3477	-5.79333	-16.7251	0				2007-02-01	12.0127	-3.07468	-14.4362	0
2007-02-02	11.8887	1.75131	-15.2676	0				2007-02-02	11.9355	-5.65738	-17.7883	0				2007-02-02	12.0771	-0.335785	-13.7991	0
2007-02-03	11.8093	-2.34918	-11.9504	0				2007-02-03	11.9191	2.42184	-12.0346	0				2007-02-03	11.9998	2.41974	-7.76688	0
2007-02-04	11.1979	-1.33667	-11.7423	0				2007-02-04	11.5224	6.33151	-6.07355	0				2007-02-04	5.71866	2.17468	-7.59018	0
2007-02-05	11.623	1.99771	-9.81934	0				2007-02-05	11.1531	6.30441	-5.21832	0				2007-02-05	7.70938	-0.588226	-11.4596	0.00472972
2007-02-06	11.5556	2.56345	-7.49509	0.839805				2007-02-06	11.4148	4.23843	-6.78778	0.00638054				2007-02-06	7.10241	-4.78543	-15.5796	0
2007-02-07	6.88823	-2.55298	-13.2275	0.0181018				2007-02-07	11.3978	2.00955	-8.02011	0				2007-02-07	12.318	2.81387	-8.27859	0
2007-02-08	12.2693	-4.1882	-14.6955	0				2007-02-08	10.0498	5.50827	-6.89194	0				2007-02-08	12.2515	7.64123	-6.27472	0
2007-02-09	10.7539	4.23691	-11.8232	0				2007-02-09	4.43461	3.55753	-7.51529	0				2007-02-09	12.8297	7.68228	-5.12695	0
2007-02-10	7.77552	4.64487	-7.51486	0.0215844				2007-02-10	12.9526	6.14963	-7.50302	0				2007-02-10	11.3381	7.16574	-6.50656	0
2007-02-11	6.74472	-3.90494	-12.9875	0.022146				2007-02-11	12.0415	9.22491	-5.02411	0				2007-02-11	11.9471	10.3788	-4.42139	0
2007-02-12	12.7551	-5.08536	-15.6476	0				2007-02-12	10.8245	10.2442	-2.80032	0				2007-02-12	9.18575	11.3478	-2.87009	0
2007-02-13	13.4643	-1.22247	-15.6241	0				2007-02-13	8.87577	8.34451	-1.0867	0.014055				2007-02-13	4.2028	-3.75671	-11.9232	1.98423
2007-02-14	12.575	-3.01825	-12.7538	0				2007-02-14	13.2714	7.13876	-3.13818	0				2007-02-14	12.1607	-1.60049	-15.0458	0
2007-02-15	12.2341	0.593872	-14.1617	0				2007-02-15	10.9547	9.62723	-2.74759	0				2007-02-15	13.1451	0.916199	-11.189	0.00665185
2007-02-16	7.41185	1.367	-9.7858	1.46918				2007-02-16	5.49851	6.44281	-3.71985	0.0424711				2007-02-16	8.39489	0.163239	-9.64539	0.167867
2007-02-17	6.86605	-0.358643	-8.43454	0.0892672				2007-02-17	11.9667	5.15561	-4.28491	0				2007-02-17	6.75964	-2.11578	-11.2559	0.416233
2007-02-18	11.3555	4.69388	-6.69284	0				2007-02-18	6.59538	1.11002	-8.49957	0				2007-02-18	12.3062	0.66098	-12.2386	1.1925
2007-02-19	10.7063	6.58673	-5.10703	0				2007-02-19	14.0406	0.336823	-10.5253	0				2007-02-19	13.9056	0.0598755	-10.6491	0
2007-02-20	9.81821	6.50253	-7.07922	0				2007-02-20	11.9998	5.69397	-8.39087	0				2007-02-20	11.6247	0.44809	-12.2165	0
2007-02-21	5.09537	-3.73804	-12.3919	0.0495179				2007-02-21	12.9731	9.02255	-2.76047	0				2007-02-21	12.3805	-2.0321	-12.2859	0
2007-02-22	2.69417	-7.90216	-13.742	0.3494				2007-02-22	13.9579	10.2824	-2.00552	0				2007-02-22	12.9189	4.58792	-8.55514	0
2007-02-23	0.115648	-5.9968	-11.1406	0.037848				2007-02-23	9.64846	11.4517	-1.49081	0.020253				2007-02-23	14.2538	4.54651	-6.7254	0
2007-02-24	4.63816	-4.07175	-16.3614	0.217583				2007-02-24	9.37609	6.58789	-3.13351	0.00901296				2007-02-24	8.28292	1.08395	-8.22879	0
2007-02-25	14.8478	-0.235901	-16.3617	0				2007-02-25	9.81111	4.76224	-5.14951	0.64675				2007-02-25	12.263	6.26251	-5.26651	0
2007-02-26	14.8469	5.55704	-12.2772	0				2007-02-26	15.3009	2.53748	-7.7916	0				2007-02-26	11.4891	5.33035	-4.20825	0
2007-02-27	12.3232	2.40375	-7.03488	0.0603464				2007-02-27	15.1422	10.3333	-2.6127	0				2007-02-27	14.5067	5.40653	-5.57361	0.040354
2007-02-28	12.2196	-1.10117	-8.02512	0.0450501				2007-02-28	16.5852	7.20108	-2.80798	0				2007-02-28	5.46286	0.562317	-7.66983	1.51173
2007-03-01	16.0818	5.75705	-7.46695	0				2007-03-01	11.3239	11.2341	-0.914215	0.202405				2007-03-01	8.28409	1.43768	-10.0053	0.228083
2007-03-02	11.7345	5.60544	-6.44174	0				2007-03-02	4.18203	5.9205	-3.71671	3.89445				2007-03-02	12.7391	1.9003	-8.91055	0.0518457
2007-03-03	15.1543	0.994751	-7.90924	0				2007-03-03	15.395	5.10019	-6.36426	0.202766				2007-03-03	16.4036	3.45017	-7.03714	0
2007-03-04	15.625	1.32718	-8.78439	0				2007-03-04	7.74553	7.62848	-5.82101	0.176349				2007-03-04	17.6146	2.94989	-7.04828	0
2007-03-05	15.7732	2.87027	-7.8494	0				2007-03-05	17.7248	10.8328	-2.83588	0				2007-03-05	18.0387	10.4934	-4.74454	0
2007-03-06	16.5598	6.03723	-6.88245	0.39308				2007-03-06	17.0073	11.7477	-1.98688	0				2007-03-06	16.5342	13.8111	-0.927582	0
2007-03-07	11.1659	5.58029	-2.09345	0.0461731				2007-03-07	16.7347	9.73633	-1.03464	0				2007-03-07	17.4667	11.0009	-1.64014	0
2007-03-08	17.0478	6.61179	-3.89047	0				2007-03-08	14.3562	14.8894	0.253143	0.172058				2007-03-08	14.628	24.9584	2.46829	0
2007-03-09	15.9057	7.76532	-4.4505	0.0231209				2007-03-09	11.8657	13.6233	1.63251	0				2007-03-09	17.6018	19.0835	1.35504	0.00386047
2007-03-10	11.7094	6.41202	-3.73148	1.50771				2007-03-10	9.01586	8.53201	-0.309876	0.314653				2007-03-10	16.7186	10.1592	-2.02887	0
2007-03-11	7.17655	1.85339	-5.50476	0.0515684				2007-03-11	18.2791	7.6225	-3.73206	0				2007-03-11	12.9024	10.2079	-1.76035	0
2007-03-12	17.9503	2.32159	-6.26022	0				2007-03-12	18.1479	9.93545	-3.3223	0				2007-03-12	17.7417	14.7785	0.817688	0.00151973
2007-03-13	19.2989	1.43628	-5.47647	0				2007-03-13	18.5396	11.9307	1.6217	0				2007-03-13	17.86	16.5061	4.29221	0.0420814
2007-03-14	18.4588	1.99628	-6.81253	0				2007-03-14	14.5032	11.3575	1.68268	0.0343362				2007-03-14	3.08961	8.00693	0.590607	0.967533
2007-03-15	20.4429	6.5654	-3.16492	0				2007-03-15	16.5328	13.2762	2.37826	0				2007-03-15	10.419	5.66025	-1.56885	0.840451
2007-03-16	20.6224	6.36392	-1.13043	0				2007-03-16	19.0597	19.2636	4.52438	0.0836669				2007-03-16	13.5824	5.41782	-3.51913	0
2007-03-17	18.2269	10.3029	-2.03232	0.0672659				2007-03-17	7.7465	15.0428	3.31781	0.354309				2007-03-17	15.3731	7.44388	-3.58017	0.0345307
2007-03-18	16.4419	7.58383	-2.84305	0.0592695				2007-03-18	1.99783	1.5961	-4.97018	4.17744				2007-03-18	20.0497	11.618	-2.55215	0.0193713
2007-03-19	13.3014	6.57724	-0.20108	0.0249421				2007-03-19	14.4646	4.6235	-5.67374	0.137707				2007-03-19	11.6963	14.864	2.03381	0
2007-03-20	18.4614	7.10187	-0.310791	0				2007-03-20	16.7382	11.2797	-1.16678	0.0103223				2007-03-20	19.3293	19.6821	7.61883	0
2007-03-21	13.2612	12.6264	0.371765	0.0811588				2007-03-21	13.4082	9.45841	1.03583	0				2007-03-21	18.6628	20.3298	5.53278	0
2007-03-22	20.0092	7.20706	-1.03848	0.0593247				2007-03-22	11.9461	9.47736	0.867645	0				2007-03-22	12.9774	12.0563	2.94882	0.170467
2007-03-23	18.9033	5.40494	-2.49698	0				2007-03-23	16.69	11.6264	1.09403	0.112619				2007-03-23	7.14535	6.97257	-2.28326	0.098071
2007-03-24	22.7759	3.93863	-3.06162	0				2007-03-24	18.1518	8.8652	-0.554688	0.0447037				2007-03-24	9.53399	4.72018	-4.96399	0.129841
2007-03-25	22.3106	13.6388	-2.25278	0				2007-03-25	18.2561	12.9692	0.314606	0.053644				2007-03-25	17.2864	14.943	0.711243	0.0287908
2007-03-26	21.5536	7.96536	-2.08258	0.00308113				2007-03-26	16.7966	8.98331	-2.95044	0				2007-03-26	20.8017	20.674	3.75705	0.0960588
2007-03-27	22.4091	7.10254	-2.97409	0				2007-03-27	13.0976	7.32959	-2.94015	0.0362209				2007-03-27	11.028	15.9058	5.70926	0.040351
2007-03-28	18.1864	14.7006	-0.925476	0.188676				2007-03-28	21.4737	12.4453	-0.418671	0				2007-03-28	13.3293	16.0678	5.96722	0.268771
2007-03-29	19.2924	11.3554	0.734009	0				2007-03-29	21.6606	12.2717	-1.14517	0.0202463				2007-03-29	17.7834	18.8918	7.14441	0.0520447
2007-03-30	16.0873	15.0034	1.11502	0.148842				2007-03-30	22.4517	13.1839	1.06039	0				2007-03-30	12.1398	12.5727	3.20847	0.171232
2007-03-31	9.96906	12.5612	1.90393	0.0477211				2007-03-31	20.5401	15.273	1.87625	0.0167524				2007-03-31	5.34798	7.80631	1.61005	0.388306
2007-04-01	22.5891	14.7498	1.91635	0.0750931				2007-04-01	23.9509	18.4473	3.6048	0				2007-04-01	18.0062	12.1113	1.39914	0.275643
2007-04-02	21.8083	12.0749	-0.056427	0				2007-04-02	21.9618	16.1214	1.92563	0				2007-04-02	19.5139	13.5072	3.07327	0.169088
2007-04-03	23.295	19.0841	-0.0447998	0				2007-04-03	21.751	19.6934	6.71799	0.0796032				2007-04-03	22.0083	16.191	3.92667	0.014319
2007-04-04	16.7901	19.7232	4.41095	0.00785057				2007-04-04	15.7174	19.9773	7.90411	0.607194				2007-04-04	10.6799	12.5196	4.2739	0
2007-04-05	9.36063	2.99438	-0.120636	0.542188				2007-04-05	12.9689	15.817	2.17837	1.44009				2007-04-05	19.5269	12.7846	3.60162	0.0714526
2007-04-06	23.6871	10.2448	-0.229706	0				2007-04-06	14.2397	10.1076	0.367523	0.179663				2007-04-06	13.1893	11.9641	2.42999	0.0194587
2007-04-07	24.2342	16.5712	2.39481	0				2007-04-07	2.84398	7.15591	-0.529755	0.627228				2007-04-07	23.8175	15.7075	4.52341	0
2007-04-08	23.4158	19.8238	3.51541	0				2007-04-08	4.2379	3.35513	-5.82754	0.0191965				2007-04-08	23.8143	20.8148	7.14722	0
2007-04-09	23.6528	16.4047	4.34277	0				2007-04-09	23.94	8.03534	-2.83737	0				2007-04-09	23.6712	23.9602	9.91275	0
2007-04-10	18.7876	15.4969	4.04773	0.0617121				2007-04-10	23.5657	11.3161	-0.244904	0.0362399				2007-04-10	21.3469	22.4959	10.5739	0.0490675
2007-04-11	19.2981	15.8798	0.97113	0				2007-04-11	22.7045	13.9852	0.666779	0				2007-04-11	18.2893	21.1684	10.0207	0.040094
2007-04-12	24.7726	9.79547	-0.47879	0				2007-04-12	24.5565	15.9588	0.40445	0				2007-04-12	9.96633	14.2756	6.97473	1.95982
2007-04-13	25.5958	12.6625	-0.0992126	0				2007-04-13	22.4931	15.4475	2.4364	0.00269593				2007-04-13	15.0245	13.2567	3.78903	0
2007-04-14	23.6462	21.3085	1.91937	0				2007-04-14	24.2742	21.4132	8.83975	0				2007-04-14	16.4355	14.929	5.03146	0.0598624
2007-04-15	25.0141	21.4022	9.1091	0				2007-04-15	18.3214	21.7399	9.68469	0				2007-04-15	9.51748	14.2179	4.77982	0.0299631
2007-04-16	24.9461	21.6992	8.98755	0				2007-04-16	15.1296	19.4097	9.37479	0.246345				2007-04-16	10.81	13.8788	4.46298	5.56294
2007-04-17	24.0486	26.3294	10.0956	0				2007-04-17	24.6259	20.4002	8.33499	0.167016				2007-04-17	7.78597	14.35	5.99155	1.22263
2007-04-18	19.5618	19.9694	3.76721	0				2007-04-18	24.5846	22.6107	8.37039	0				2007-04-18	10.3446	14.0397	6.58209	1.18714
2007-04-19	21.0611	15.5176	3.05151	0				2007-04-19	23.422	22.2356	7.97009	0				2007-04-19	14.4357	12.923	4.66263	0.485146
2007-04-20	24.9369	10.5593	2.0748	0				2007-04-20	16.1176	21.0373	8.31793	0				2007-04-20	20.9514	12.4704	5.34302	0.146055
2007-04-21	20.5465	13.2392	4.07925	0.0260385				2007-04-21	24.4041	25.0583	10.4169	0				2007-04-21	22.3284	18.4563	7.36398	0.235529
2007-04-22	25.7908	17.1811	4.48703	0				2007-04-22	23.0191	26.5599	6.02896	0.214192				2007-04-22	24.713	16.3264	4.90945	0.0274828
2007-04-23	25.9376	21.2232	7.75644	0				2007-04-23	23.7156	7.35947	0.41507	0.0664458				2007-04-23	24.5084	16.4305	6.10858	0
2007-04-24	24.4906	23.5251	9.69125	0				2007-04-24	26.7397	13.9035	2.49826	0				2007-04-24	20.9488	19.005	8.98074	0
2007-04-25	25.1363	25.5963	10.148	0				2007-04-25	26.4165	20.9837	9.01797	0				2007-04-25	13.4979	13.8243	6.88058	0.0666161
2007-04-26	23.8997	27.8375	11.7339	0				2007-04-26	24.1706	24.1181	9.16238	0				2007-04-26	25.5826	19.8537	7.6366	0
2007-04-27	22.9632	28.5699	14.6365	0				2007-04-27	22.0552	19.3639	8.51318	0				2007-04-27	27.7621	20.8763	6.57608	0
2007-04-28	16.0486	26.0356	15.6746	0.637194				2007-04-28	19.8437	20.4795	9.30261	0				2007-04-28	25.6098	23.9631	12.3375	0.102619
2007-04-29	21.883	24.9619	13.9026	0.0997327				2007-04-29	23.8859	24.7053	13.2004	0				2007-04-29	25.6695	27.5233	14.7007	0
2007-04-30	16.2349	19.163	10.2924	1.67576				2007-04-30	23.2076	28.2148	14.4162	0				2007-04-30	13.8216	23.773	9.94821	0
2007-05-01	28.7679	18.6454	3.84586	0				2007-05-01	17.5385	25.4815	11.7596	0.402701				2007-05-01	26.9946	15.3972	3.43576	0
2007-05-02	28.3446	16.9549	2.59021	0				2007-05-02	20.6473	19.5392	9.1362	0				2007-05-02	26.6936	13.8884	4.04031	0
2007-05-03	28.5826	16.9598	3.68314	0				2007-05-03	17.1874	20.1092	9.34476	0.058653				2007-05-03	26.492	18.7245	7.59091	0
2007-05-04	21.3018	20.379	7.1232	0.024414				2007-05-04	23.4463	21.9348	9.93326	0.0134988				2007-05-04	25.4687	22.7894	11.8558	0
2007-05-05	27.99	22.6206	9.22684	0				2007-05-05	19.3353	18.6345	9.60629	0				2007-05-05	26.3885	24.8101	11.4916	0
2007-05-06	26.2719	24.397	10.8207	0				2007-05-06	25.2719	23.0355	13.0031	0				2007-05-06	26.2443	22.82	8.86997	0
2007-05-07	26.1353	25.7723	13.3872	0				2007-05-07	21.8411	26.2766	14.9506	0				2007-05-07	27.7497	24.1237	11.0261	0
2007-05-08	27.0944	28.9171	15.382	0				2007-05-08	24.9955	24.5258	10.0948	0				2007-05-08	24.4521	31.415	18.175	0
2007-05-09	23.5035	28.0253	13.9283	0.683118				2007-05-09	22.3278	17.4977	7.47672	1.81766				2007-05-09	14.7244	30.2958	17.7445	0.557306
2007-05-10	20.8553	18.6606	9.37915	0.135467				2007-05-10	22.0084	20.4865	10.5458	0				2007-05-10	20.4414	26.7142	17.2757	2.02869
2007-05-11	26.8832	15.8581	4.8591	0				2007-05-11	25.8066	24.2947	14.1905	0.0758546				2007-05-11	3.43453	19.5204	13.1599	8.5874
2007-05-12	22.9653	22.7937	8.25143	0.0839015				2007-05-12	21.8061	25.8285	15.9402	0				2007-05-12	26.6862	20.1946	11.9696	0.163357
2007-05-13	20.3223	23.7528	11.412	0				2007-05-13	19.8962	21.9269	12.5608	9.36023				2007-05-13	28.035	21.1854	11.6813	0
2007-05-14	23.2809	25.197	11.8704	0				2007-05-14	18.6876	21.1448	10.744	0.554116				2007-05-14	25.2158	23.6154	12.815	0
2007-05-15	23.5555	27.7056	14.0574	0				2007-05-15	25.2286	26.4934	14.3071	0				2007-05-15	27.5113	21.7172	11.5776	0
2007-05-16	18.8285	27.393	16.3666	28.0708				2007-05-16	25.9752	27.2053	14.3933	0				2007-05-16	27.9003	25.9023	14.3172	0
2007-05-17	18.9718	24.5646	16.0404	0.293647				2007-05-17	19.9605	24.4085	14.7921	0.952885				2007-05-17	19.8014	23.7686	11.5187	0
2007-05-18	27.4614	27.1874	15.9161	0				2007-05-18	25.3947	24.4694	11.9262	0.108529				2007-05-18	26.2433	25.1812	15.2401	0.110864
2007-05-19	17.1059	24.6332	15.4706	0				2007-05-19	15.3776	16.9911	9.56927	0				2007-05-19	26.7496	26.0021	12.0628	0
2007-05-20	8.97747	20.1985	12.135	1.16509				2007-05-20	25.4891	20.1279	12.0537	0				2007-05-20	27.7439	16.4323	7.58084	0
2007-05-21	28.6734	18.7986	7.43201	0				2007-05-21	22.8829	22.7907	12.2402	0				2007-05-21	27.9309	20.2166	9.07785	0
2007-05-22	30.1355	24.1308	10.8853	0				2007-05-22	28.0296	26.3844	16.0177	0				2007-05-22	27.9333	24.3968	14.8528	0
2007-05-23	30.7062	28.6477	15.5777	0				2007-05-23	24.7793	27.6486	17.6149	0				2007-05-23	25.5359	28.9033	17.1248	0
2007-05-24	31.0126	31.6122	16.9055	0				2007-05-24	25.1375	24.2997	15.1488	0.257902				2007-05-24	24.4082	26.6596	16.3485	0
2007-05-25	26.4686	30.7866	18.8511	0				2007-05-25	10.0885	17.1993	10.1378	5.97397				2007-05-25	27.2524	27.269	16.6889	0
2007-05-26	23.9828	28.9279	19.4664	0.0438101				2007-05-26	29.2258	22.1106	12.4469	0				2007-05-26	28.2116	28.3675	18.1514	0.0405941
2007-05-27	17.5913	25.2208	15.2963	0.668027				2007-05-27	29.658	24.2502	14.7107	0				2007-05-27	26.9725	30.8195	18.8947	1.54385
2007-05-28	28.6424	29.5201	17.1093	0.00527179				2007-05-28	28.3427	28.6037	15.0255	0				2007-05-28	24.816	30.4775	18.4806	0.440131
2007-05-29	24.8259	26.8155	18.8664	0				2007-05-29	28.436	24.9195	14.8908	0				2007-05-29	25.0586	29.2509	19.5459	0.344042
2007-05-30	23.3854	24.8955	15.8973	0				2007-05-30	25.8417	29.7771	19.2246	0				2007-05-30	24.1882	28.418	19.8268	3.20123
2007-05-31	27.0546	26.7865	17.0191	0.0384761				2007-05-31	17.1091	29.5456	18.5928	0				2007-05-31	17.8169	27.3311	17.276	0.971956
2007-06-01	13.12	21.0113	15.4294	11.7974				2007-06-01	24.3383	31.0735	19.2158	0				2007-06-01	28.5666	29.5266	16.9983	0.253809
2007-06-02	23.1635	25.3991	16.1819	0				2007-06-02	16.7657	24.7924	15.0725	1.19549				2007-06-02	27.898	24.511	13.3252	0
2007-06-03	25.1774	27.5248	17.5167	2.62974				2007-06-03	27.6454	25.7935	16.2029	0				2007-06-03	28.5504	23.6672	13.1116	0
2007-06-04	14.7637	22.8317	17.4103	2.96115				2007-06-04	30.8328	27.1449	17.6397	0				2007-06-04	23.2149	25.899	17.6399	0.714779
2007-06-05	26.8645	30.6555	18.573	0				2007-06-05	26.074	28.5343	18.0412	0				2007-06-05	27.3177	24.473	13.1212	0
2007-06-06	28.1304	22.7163	12.6845	0				2007-06-06	23.1516	28.5329	18.0064	0.0545185				2007-06-06	25.9589	25.7966	16.3058	0.0347241
2007-06-07	30.6314	19.1562	10.7349	0				2007-06-07	28.4723	31.38	20.6459	0				2007-06-07	27.066	27.744	16.2979	0
2007-06-08	30.0173	22.6301	12.9603	0				2007-06-08	29.3455	26.7031	16.3775	0				2007-06-08	28.5689	29.0101	18.5728	0
2007-06-09	26.7955	26.7024	15.981	0				2007-06-09	27.835	30.1494	18.4278	0				2007-06-09	27.7212	29.7815	19.3145	0
2007-06-10	25.6617	28.5463	18.6936	1.63009				2007-06-10	23.8989	28.148	18.335	0				2007-06-10	28.4244	30.559	20.4491	0
2007-06-11	20.1241	20.098	15.3357	0.908316				2007-06-11	29.4504	24.8941	16.0991	0				2007-06-11	27.5615	32.6898	21.8805	0.651107
2007-06-12	28.6161	24.9717	15.0797	0.0546836				2007-06-12	25.275	29.2549	18.1281	0				2007-06-12	25.6365	28.5963	16.0919	0
2007-06-13	27.8346	27.6115	17.9627	0.052714				2007-06-13	30.4283	31.2278	20.3181	0				2007-06-13	29.388	26.8131	17.4126	0
2007-06-14	20.7559	26.6241	19.1408	0.132877				2007-06-14	25.0522	30.6627	20.6756	0				2007-06-14	27.4189	30.034	18.3853	0
2007-06-15	22.862	24.3011	17.2514	1.34579				2007-06-15	21.1398	30.1572	19.4462	0				2007-06-15	27.3329	30.9839	18.6394	0
2007-06-16	14.3601	19.8795	16.9912	1.1308				2007-06-16	22.0689	30.3711	19.2406	0.836337				2007-06-16	26.879	32.6867	20.7578	0
2007-06-17	22.7097	21.9004	15.9429	2.02986				2007-06-17	12.8126	22.4839	17.0535	1.63448				2007-06-17	22.3831	31.9961	21.6231	0.0640057
2007-06-18	28.3264	26.7681	16.0994	0				2007-06-18	21.3545	22.9218	16.2596	3.35849				2007-06-18	22.4461	31.4698	21.6299	0
2007-06-19	25.7153	30.3224	18.012	0.414775				2007-06-19	22.3848	27.1391	16.4847	0.253996				2007-06-19	8.29044	23.7949	18.3716	1.59915
2007-06-20	9.7809	24.3619	19.2333	0				2007-06-20	24.1877	28.6916	18.2326	0				2007-06-20	20.1004	25.2029	16.6983	0
2007-06-21	4.84589	21.1744	16.2086	14.1846				2007-06-21	27.9845	30.5109	20.36	0.194884				2007-06-21	24.1091	26.3203	18.7262	0
2007-06-22	16.3036	24.3698	17.3266	1.97937				2007-06-22	27.526	32.4346	21.5818	0				2007-06-22	15.776	25.9569	18.7611	0.518936
2007-06-23	25.97	22.4427	16.0116	0				2007-06-23	17.0325	30.3098	17.0312	0.286719				2007-06-23	14.8914	26.6973	18.7806	0.219864
2007-06-24	29.522	25.0128	16.6906	0				2007-06-24	26.9594	25.0268	16.7934	0				2007-06-24	28.8978	30.5261	18.6415	0
2007-06-25	26.0548	27.671	18.1847	0.135952				2007-06-25	29.0623	29.382	19.3868	0				2007-06-25	29.3336	30.4758	20.0577	0
2007-06-26	24.2863	28.8803	19.0972	0.223528				2007-06-26	22.037	29.9609	20.2832	0				2007-06-26	28.0568	34.1881	19.4557	0
2007-06-27	27.7352	30.6406	19.7558	0				2007-06-27	27.5867	33.8274	22.274	0				2007-06-27	26.5663	29.3493	20.0337	0.0586913
2007-06-28	11.3938	27.0007	20.2333	0.381436				2007-06-28	21.0494	31.5069	22.3798	0.181101				2007-06-28	25.7666	30.4606	20.966	3.37974
2007-06-29	16.7286	26.2656	20.2771	0				2007-06-29	19.2598	32.6428	22.031	0.156881				2007-06-29	23.9039	30.2317	19.9658	0.812601
2007-06-30	27.3116	30.1104	20.6664	0.163858				2007-06-30	13.1088	30.9627	20.8551	0				2007-06-30	23.2201	28.1345	18.9859	0.563985
2007-07-01	19.5632	25.9236	18.3748	0				2007-07-01	26.7335	33.442	22.2573	0.453909				2007-07-01	13.8017	27.3741	18.7161	0
2007-07-02	20.1301	27.0464	17.7754	0				2007-07-02	27.7214	35.9233	23.1378	0				2007-07-02	11.9698	25.8556	17.8032	0.00891919
2007-07-03	25.1148	29.2787	19.1916	0.368911				2007-07-03	18.0275	30.3803	19.6399	1.06924				2007-07-03	11.4177	19.5559	15.4341	2.59503
2007-07-04	18.7373	28.2235	17.9531	0.0154375				2007-07-04	14.2196	27.6828	19.9026	0				2007-07-04	21.0591	25.0536	17.2865	0.0762537
2007-07-05	28.1532	29.493	16.9945	0				2007-07-05	27.9973	34.6758	22.47	0				2007-07-05	28.282	28.1921	18.078	0
2007-07-06	28.8485	31.315	17.4542	0				2007-07-06	27.8925	34.4657	23.3637	0				2007-07-06	27.0445	30.1311	20.553	0
2007-07-07	27.9268	31.9428	18.9008	0				2007-07-07	27.1094	31.9699	22.6692	0				2007-07-07	21.8343	28.5114	18.3659	0
2007-07-08	25.9214	32.4381	21.5055	0				2007-07-08	17.8899	32.3731	21.3435	2.89253				2007-07-08	26.7502	26.7795	16.9604	0.0301772
2007-07-09	22.5277	30.7068	21.0378	0.373788				2007-07-09	9.2133	27.8653	20.1483	9.32053				2007-07-09	27.9404	26.5188	14.8517	0
2007-07-10	17.1522	26.4211	20.3868	1.65192				2007-07-10	6.35327	21.7918	16.905	5.12302				2007-07-10	29.278	29.888	20.4798	0
2007-07-11	23.7456	27.6765	18.6468	0				2007-07-11	22.0492	23.9545	17.1775	2.90425				2007-07-11	27.413	33.3781	21.6825	0
2007-07-12	25.8044	28.641	20.3648	2.66663				2007-07-12	27.3968	30.0844	16.9931	0				2007-07-12	26.8552	32.8348	21.3432	0
2007-07-13	22.3503	27.6146	19.3131	2.27478				2007-07-13	27.1997	29.7275	19.5018	0.0832703				2007-07-13	25.1944	31.5169	19.4652	0
2007-07-14	24.5981	29.2503	18.6794	0.520819				2007-07-14	22.7461	29.8389	19.6655	1.23737				2007-07-14	3.7426	22.7803	17.8304	0.528625
2007-07-15	26.201	31.3781	20.5406	0.123501				2007-07-15	21.2645	29.6498	20.3096	0.0602978				2007-07-15	28.1856	28.6938	17.9869	0
2007-07-16	23.7555	32.0789	22.6447	0.0414716				2007-07-16	19.3086	29.0163	20.5943	0.3765				2007-07-16	23.2089	27.1775	18.4557	0
2007-07-17	23.713	32.1332	21.1213	0.00873092				2007-07-17	15.7946	28.5156	18.4709	0				2007-07-17	27.9445	31.5578	19.1848	0.031198
2007-07-18	26.2946	29.5046	17.3839	0.0668786				2007-07-18	18.193	29.1214	18.6924	0.494152				2007-07-18	26.5822	31.6125	20.565	0
2007-07-19	24.8043	24.8886	17.7192	0.116747				2007-07-19	17.2145	24.4073	17.5234	1.51411				2007-07-19	24.9067	31.2068	22.3711	0.0129241
2007-07-20	18.557	22.7329	16.9353	0				2007-07-20	15.5668	22.0903	16.5328	2.83747				2007-07-20	26.2398	32.1701	22.186	0.194134
2007-07-21	22.0702	25.3778	16.2053	0.413306				2007-07-21	21.9626	24.9392	17.1105	1.38399				2007-07-21	21.5941	30.7398	21.5621	0.0628981
2007-07-22	14.5061	22.0769	16.4842	0				2007-07-22	24.9101	27.4866	18.7601	1.341				2007-07-22	13.5735	29.1992	21.2188	4.16375
2007-07-23	24.8014	24.3817	16.3707	1.48223				2007-07-23	27.2531	31.4467	21.3328	1.05155				2007-07-23	27.3647	32.5861	22.2204	0.213101
2007-07-24	26.5341	28.3292	17.8879	0				2007-07-24	26.9791	32.2788	22.5759	0.0878615				2007-07-24	26.0077	31.1667	21.5221	0.203269
2007-07-25	26.3652	28.2782	19.8943	0				2007-07-25	26.923	33.6064	23.8639	0.0123926				2007-07-25	25.9091	29.7011	21.7392	0.0529615
2007-07-26	24.9651	28.8843	20.2248	0				2007-07-26	22.8154	33.3528	23.7776	0.0210083				2007-07-26	19.7981	26.9582	19.1366	0.0266617
2007-07-27	20.6692	27.6764	20.7855	0				2007-07-27	8.81765	28.9998	21.608	2.76371				2007-07-27	24.8336	29.2395	19.014	0
2007-07-28	15.121	24.7834	20.5051	3.01738				2007-07-28	16.2284	27.1466	21.3311	4.13525				2007-07-28	21.2815	28.56	19.925	0.160727
2007-07-29	21.3073	25.0405	18.2442	0				2007-07-29	16.5913	27.0254	20.9684	7.42603				2007-07-29	19.7478	29.3555	18.9747	0.0465874
2007-07-30	20.4459	23.2864	17.7911	4.23692				2007-07-30	22.0383	23.0611	18.3157	22.9202				2007-07-30	26.312	36.3866	23.5545	0
2007-07-31	19.1281	21.9112	18.1027	1.78435				2007-07-31	17.1319	23.4639	17.5754	8.2298				2007-07-31	18.7827	33.373	21.5748	0.430322
2007-08-01	20.3042	24.9828	17.5599	0.204111				2007-08-01	14.4905	26.3224	17.0744	6.82227				2007-08-01	27.0518	34.5221	19.6357	0
2007-08-02	21.7739	26.1209	19.443	0.00659692				2007-08-02	25.0867	26.8545	19.0274	2.81476				2007-08-02	27.6822	32.1104	21.1666	0
2007-08-03	18.4503	25.5278	20.434	0				2007-08-03	25.75	27.3876	16.8489	1.33154				2007-08-03	24.7194	34.0325	23.1625	0
2007-08-04	16.819	26.3919	22.0374	4.18076				2007-08-04	26.7899	28.2875	18.5725	0				2007-08-04	26.0777	35.6277	23.6573	0.106074
2007-08-05	10.2513	25.1734	18.5778	0.705394				2007-08-05	20.4103	28.3666	19.5737	0				2007-08-05	25.002	34.489	22.1773	0.0287319
2007-08-06	24.5288	27.1061	19.7247	0				2007-08-06	23.1189	31.7463	20.3187	0.219853				2007-08-06	25.9699	34.3593	22.4434	0.0292971
2007-08-07	22.4783	28.9246	20.674	0				2007-08-07	10.9484	26.7829	19.0132	0.342365				2007-08-07	18.0216	31.7221	22.0518	1.00603
2007-08-08	17.9094	29.0565	19.9942	3.51208				2007-08-08	25.9497	28.6199	17.1767	0				2007-08-08	25.23	32.0578	21.2383	0.0459917
2007-08-09	17.8466	24.3874	16.6789	1.04552				2007-08-09	24.8889	29.6001	17.5214	0.14974				2007-08-09	26.885	34.4775	22.9178	0.0631421
2007-08-10	25.5663	27.2278	15.723	0				2007-08-10	23.6971	30.2007	18.8105	0.102356				2007-08-10	25.2869	34.4529	23.3219	0.377742
2007-08-11	24.4016	27.637	16.9117	0				2007-08-11	19.0401	28.6808	18.5938	0.384545				2007-08-11	23.1852	36.9379	22.2265	0
2007-08-12	24.2839	28.3515	18.3671	0.63323				2007-08-12	17.7803	27.0098	17.912	0.150264				2007-08-12	27.6447	36.1238	20.3432	0
2007-08-13	23.8948	27.3926	19.104	0.110387				2007-08-13	20.1101	27.1924	18.0441	0.0519878				2007-08-13	25.8716	35.2919	23.5962	0
2007-08-14	23.8158	26.6691	19.2781	0.287864				2007-08-14	24.5582	30.1964	18.5707	0				2007-08-14	12.2201	32.1958	20.2426	0
2007-08-15	13.9101	21.5193	19.85	22.6288				2007-08-15	21.739	30.0281	20.8193	0				2007-08-15	25.3031	32.2871	20.4352	0
2007-08-16	19.4207	25.3424	19.3959	1.16357				2007-08-16	19.2509	30.3228	21.0768	0.158071				2007-08-16	13.5961	27.5216	21.4097	2.70191
2007-08-17	22.6183	26.8909	18.9359	0.108667				2007-08-17	17.3068	27.4521	17.5925	0.195761				2007-08-17	9.65642	25.4152	19.6802	23.7623
2007-08-18	22.8123	27.0282	19.1429	0				2007-08-18	25.0016	28.444	19.0258	0				2007-08-18	10.1632	25.0114	17.8391	0.594383
2007-08-19	20.1429	27.7852	19.8952	0				2007-08-19	24.3353	28.3666	19.2083	0				2007-08-19	20.5446	26.0905	18.1409	0.0519563
2007-08-20	23.1783	29.106	20.9124	0				2007-08-20	19.2427	29.8268	20.5079	0.00805179				2007-08-20	15.4795	24.1291	17.7643	0.878161
2007-08-21	18.9598	28.7635	21.0736	0.423781				2007-08-21	16.7093	27.7821	18.6892	0.0572829				2007-08-21	21.403	25.5784	13.7255	0.0328289
2007-08-22	19.9327	29.2385	17.6861	4.22072				2007-08-22	24.6031	30.9244	18.6515	0				2007-08-22	24.5128	23.1205	15.055	0
2007-08-23	8.91908	20.8572	14.7813	6.04614				2007-08-23	23.9709	31.1146	19.2677	0				2007-08-23	15.8015	23.1245	15.5663	1.88228
2007-08-24	24.8097	24.3952	13.9707	0				2007-08-24	15.5467	32.3424	20.3856	0				2007-08-24	11.6178	20.2323	15.3082	1.02502
2007-08-25	23.6399	23.8887	14.854	0				2007-08-25	19.6132	30.323	18.559	0.271674				2007-08-25	15.4114	20.6082	14.5365	0.654426
2007-08-26	23.4996	29.7989	16.3565	0				2007-08-26	15.886	28.9934	18.2032	0				2007-08-26	20.9925	23.2872	14.9991	0.27174
2007-08-27	22.0228	33.1985	18.7438	0.811188				2007-08-27	24.2453	32.7096	19.6457	0				2007-08-27	21.7002	22.5826	15.2398	1.09338
2007-08-28	12.0758	24.2476	18.1531	2.29025				2007-08-28	22.1571	30.4727	19.982	0				2007-08-28	17.0794	22.484	14.6213	0.601903
2007-08-29	15.9594	26.8822	16.9135	4.91516				2007-08-29	11.0589	29.6072	19.6651	5.11207				2007-08-29	21.5949	25.4148	15.7998	0.00800693
2007-08-30	6.91201	20.1958	15.5605	0.663622				2007-08-30	9.17131	24.7992	17.6793	1.0998				2007-08-30	16.165	25.3599	15.7472	0
2007-08-31	18.7386	24.8447	15.849	0.414025				2007-08-31	12.7172	22.3465	13.7984	0				2007-08-31	22.2753	27.1754	16.0998	0.152172
2007-09-01	8.93236	19.333	11.7938	1.35433				2007-09-01	17.775	22.7144	13.4336	0				2007-09-01	22.5157	27.0838	16.2643	0.334101
2007-09-02	20.5301	22.4891	12.4611	0				2007-09-02	23.2449	25.8283	14.5973	0				2007-09-02	18.0684	25.5748	15.2734	0.288391
2007-09-03	18.7693	24.2675	13.5337	0				2007-09-03	22.9473	28.4123	17.8337	0				2007-09-03	20.3029	24.6062	15.4383	0
2007-09-04	20.2686	26.3946	15.8582	0.0503912				2007-09-04	20.7484	30.9334	18.5541	0				2007-09-04	13.8966	23.4094	14.0541	0.141049
2007-09-05	11.2733	24.3607	17.4655	0.285083				2007-09-05	21.9784	30.8966	17.8065	0				2007-09-05	15.9411	23.256	15.3058	0.160266
2007-09-06	8.2751	22.7704	14.9501	0.245048				2007-09-06	17.9591	31.0882	16.8362	0				2007-09-06	21.1136	26.4486	14.0459	0
2007-09-07	18.4624	26.2439	14.5714	0.0839172				2007-09-07	18.294	32.5936	18.2544	3.23202				2007-09-07	21.1006	21.804	9.63525	0
2007-09-08	21.0057	25.732	15.8422	0				2007-09-08	2.13156	17.3198	13.3433	2.64073				2007-09-08	23.5598	23.9799	12.8922	0
2007-09-09	17.1565	24.5085	14.8327	0.0118238				2007-09-09	17.6771	18.5113	10.5705	0				2007-09-09	20.7077	26.4678	15.7408	0.0276473
2007-09-10	12.3267	21.7133	13.8086	0.195115				2007-09-10	14.5276	17.8301	8.80173	0				2007-09-10	14.4151	24.6655	14.4884	0
2007-09-11	20.3423	24.9036	14.307	0.0132192				2007-09-11	22.0258	22.1713	10.334	0				2007-09-11	15.4517	22.416	12.4323	0.0348202
2007-09-12	18.5579	23.5387	12.0378	0				2007-09-12	21.9812	19.5676	9.75531	0				2007-09-12	22.5276	27.5987	11.2583	0
2007-09-13	18.4853	20.8198	12.0763	0				2007-09-13	20.0725	21.4334	11.3136	0				2007-09-13	21.1781	26.5075	12.1234	0
2007-09-14	16.2708	25.4462	12.6416	0.0292786				2007-09-14	14.4579	23.4013	12.2413	0.0250381				2007-09-14	21.3532	25.6343	13.7156	0
2007-09-15	20.9078	28.2395	14.3713	0				2007-09-15	12.7079	22.9436	11.8942	0.0500481				2007-09-15	19.2482	26.5717	14.4735	0.0259611
2007-09-16	20.1269	28.3695	15.4056	0				2007-09-16	13.335	24.3023	14.1971	0				2007-09-16	20.1126	28.2059	15.4611	0
2007-09-17	19.263	28.2428	15.48	0				2007-09-17	10.6344	24.1088	14.019	0.09715				2007-09-17	19.8333	29.3567	14.0876	0.0613516
2007-09-18	17.3392	27.9625	14.5565	0.0461697				2007-09-18	16.1189	25.8744	14.2414	0				2007-09-18	19.0087	27.9598	15.1706	1.05069
2007-09-19	18.8155	27.6618	15.4955	0				2007-09-19	10.8773	24.0742	14.5241	3.21455				2007-09-19	10.5583	23.9203	9.91797	0.0580593
2007-09-20	9.22688	19.7077	11.5227	0.711452				2007-09-20	15.2776	21.197	8.80978	0.630618				2007-09-20	20.64	22.1974	10.5263	0
2007-09-21	20.3982	21.3614	9.68796	0				2007-09-21	19.9193	17.5867	6.60458	0				2007-09-21	8.45536	20.4533	9.84195	0.545122
2007-09-22	15.7567	21.8958	9.46515	0.0246126				2007-09-22	18.576	20.2055	8.88055	0				2007-09-22	16.3065	26.47	14.5872	0
2007-09-23	9.56657	20.0207	12.1408	0.144535				2007-09-23	17.2928	22.5731	11.3163	0				2007-09-23	10.1066	22.6412	13.4245	0.572596
2007-09-24	16.3353	26.6695	12.956	0.2379				2007-09-24	10.791	19.7813	9.79852	1.0345				2007-09-24	7.52332	19.7019	11.9476	0.667956
2007-09-25	13.587	17.8123	6.39111	0.132165				2007-09-25	7.36997	20.4609	9.72589	1.23442				2007-09-25	10.8553	26.7655	12.6784	0.911846
2007-09-26	18.6779	16.967	5.47714	0.0740751				2007-09-26	18.4121	21.6062	8.56079	0.192606				2007-09-26	13.9118	19.5714	7.9147	0
2007-09-27	17.1519	18.4832	5.05987	0				2007-09-27	18.1911	19.1684	7.36069	0.0224202				2007-09-27	16.1146	18.7151	9.04098	0.0352413
2007-09-28	18.044	19.0368	6.46219	0				2007-09-28	18.4882	19.8645	8.41293	0				2007-09-28	10.9496	21.3349	9.83417	0.0737746
2007-09-29	12.9821	19.2371	8.16058	0.314937				2007-09-29	17.2636	23.9547	10.856	0				2007-09-29	5.93758	16.5906	8.97836	1.25087
2007-09-30	13.5902	20.0044	10.1776	0.00806515				2007-09-30	7.97516	21.3392	11.399	3.32493				2007-09-30	5.94981	14.4857	5.77753	2.51297
2007-10-01	14.3424	20.1842	9.98978	0				2007-10-01	10.0152	19.0449	7.95618	0.253325				2007-10-01	8.27247	14.4037	4.83307	0.57173
2007-10-02	13.3475	24.0245	7.58099	0.107049				2007-10-02	15.7884	20.6329	7.20023	0.140492				2007-10-02	7.73732	13.965	5.00803	0.171697
2007-10-03	14.3451	19.9316	6.75076	0.359923				2007-10-03	17.5432	22.9285	9.93381	0.0438397				2007-10-03	11.475	16.8352	6.70786	0.276636
2007-10-04	11.2767	19.6643	9.70633	0.145378				2007-10-04	6.86095	15.8076	6.68512	5.13253				2007-10-04	16.1582	15.3614	4.79434	0.226335
2007-10-05	17.7125	18.7658	6.67383	0				2007-10-05	11.3661	12.3806	2.14722	0.236417				2007-10-05	12.7783	15.9569	4.03348	0
2007-10-06	16.2973	23.1668	7.0419	0				2007-10-06	10.1808	11.4495	0.249603	0.175908				2007-10-06	12.2738	18.1146	5.57593	0
2007-10-07	17.5334	25.9262	9.16907	0				2007-10-07	17.0093	11.0827	-0.982361	0				2007-10-07	15.1917	19.4714	7.40414	0.203581
2007-10-08	17.1901	27.8811	12.7397	0				2007-10-08	16.8444	18.2353	3.65024	0				2007-10-08	8.43967	14.3204	4.67364	0.468148
2007-10-09	14.7853	25.4422	15.557	0.334005				2007-10-09	16.3971	21.5557	7.79175	0				2007-10-09	15.2938	20.3746	7.83917	0.0609878
2007-10-10	4.85057	16.8626	4.00137	0.984186				2007-10-10	13.926	19.7137	5.35751	0.266969				2007-10-10	11.4558	16.1042	7.30673	0.0406191
2007-10-11	10.9823	8.7251	1.77985	0.051726				2007-10-11	15.3099	18.7089	7.38367	0				2007-10-11	10.9832	15.9522	6.42627	0.322978
2007-10-12	16.077	15.2242	1.55292	0.0491666				2007-10-12	14.8267	20.436	5.78522	0				2007-10-12	12.6069	19.4722	7.7056	0
2007-10-13	6.98691	10.4306	0.659943	0.729232				2007-10-13	17.0661	13.968	-1.40982	0				2007-10-13	14.1266	20.5269	5.02158	0.0832842
2007-10-14	14.6361	17.8255	0.364349	0.015298				2007-10-14	16.1593	16.6906	2.3244	0				2007-10-14	15.5961	18.7882	7.03244	0.0329774
2007-10-15	12.8595	20.9106	5.4173	0.704839				2007-10-15	15.1915	20.5212	7.01657	0				2007-10-15	14.2595	19.1879	8.56451	0.148269
2007-10-16	6.42146	16.0155	5.08432	0.296114				2007-10-16	14.5796	19.8045	8.19669	0				2007-10-16	11.1372	17.6728	3.36459	0.0856159
2007-10-17	8.09956	14.9453	4.95218	1.42562				2007-10-17	15.441	20.1848	6.98132	0.130648				2007-10-17	15.7128	18.7274	4.78012	0
2007-10-18	4.70072	11.8161	5.4985	0.237934				2007-10-18	8.68323	19.6999	8.46823	1.07089				2007-10-18	14.6899	19.6156	4.91031	0
2007-10-19	9.86927	14.2722	4.12765	0				2007-10-19	9.931	17.6791	7.25446	0.0977778				2007-10-19	14.6455	13.8889	2.84354	0
2007-10-20	11.5541	14.1048	0.860382	0.044771				2007-10-20	13.1189	19.6106	5.04297	0				2007-10-20	15.0583	16.5454	1.86841	0
2007-10-21	14.9441	12.9374	-0.908478	0				2007-10-21	14.983	17.788	3.46014	0				2007-10-21	15.0501	18.4546	1.68481	0
2007-10-22	15.4901	14.3425	-1.25494	0				2007-10-22	14.1889	20.1552	4.32547	0				2007-10-22	14.5398	18.6418	2.3682	0
2007-10-23	8.45174	17.4619	3.55719	0.431396				2007-10-23	13.5472	16.4283	4.36554	0				2007-10-23	14.6613	18.1085	1.04208	0
2007-10-24	14.209	14.2974	3.82965	0				2007-10-24	14.4523	18.1791	5.06824	0				2007-10-24	14.3584	18.2502	3.0043	0
2007-10-25	11.1593	15.2802	1.57495	1.06564				2007-10-25	3.4819	7.87155	-4.53964	10.5658				2007-10-25	14.1026	18.4691	3.31393	0
2007-10-26	12.0458	9.69202	-1.20499	0.0322131				2007-10-26	14.7012	3.65866	-8.38199	0				2007-10-26	13.2429	15.0301	1.64902	0
2007-10-27	12.4731	14.3229	-0.389526	0				2007-10-27	14.5986	5.70944	-6.55103	0.0319419				2007-10-27	11.454	13.6862	1.77097	0.0232641
2007-10-28	7.96679	12.7032	1.35489	0.2856				2007-10-28	14.0624	3.93979	-6.85727	0.0551				2007-10-28	11.7312	14.093	2.19244	2.94019
2007-10-29	10.3901	13.6185	0.250427	0.135622				2007-10-29	11.4203	9.73279	-6.73691	0				2007-10-29	9.53952	12.2825	-0.00979614	0.0639532
2007-10-30	9.32649	11.9275	-0.675262	0				2007-10-30	12.6084	8.47891	-1.9324	0.0663285				2007-10-30	11.6994	11.899	0.61322	0.0251306
2007-10-31	14.4737	7.26035	-3.27414	0				2007-10-31	7.5526	10.0141	-1.70151	0.380577				2007-10-31	10.5478	10.1852	-0.755585	0.121802
2007-11-01	13.0236	11.7009	-3.02887	0				2007-11-01	10.38	7.42157	-2.15033	0.0714669				2007-11-01	9.98169	10.9688	1.02594	0.137012
2007-11-02	12.8848	17.1668	-1.73746	0				2007-11-02	11.9018	16.502	1.42355	0				2007-11-02	12.0746	11.7833	-1.80881	0.0195542
2007-11-03	12.237	17.4749	1.55295	0				2007-11-03	10.3194	15.206	3.8945	0				2007-11-03	12.6912	10.6855	-2.63388	0
2007-11-04	8.11618	11.6493	2.80136	0.267182				2007-11-04	7.16118	13.7245	3.11093	2.83292				2007-11-04	10.048	11.5121	0.351471	0.0279385
2007-11-05	2.57388	10.8726	3.42929	0.187513				2007-11-05	9.97288	15.7271	3.75217	0.071003				2007-11-05	12.1734	12.3308	0.618439	0
2007-11-06	7.37073	13.8402	1.81534	2.18184				2007-11-06	7.36852	11.1704	1.42435	0.366901				2007-11-06	11.577	13.4382	0.286987	0
2007-11-07	4.688	4.14645	-2.95584	2.49014				2007-11-07	3.90825	6.81625	-0.73349	0.81944				2007-11-07	11.8042	4.74588	-2.83862	0
2007-11-08	6.81428	1.96585	-3.02286	0.0255445				2007-11-08	11.2844	12.4951	0.401215	0				2007-11-08	11.3439	3.52679	-4.93173	0
2007-11-09	4.67062	1.86716	-3.32709	0.113278				2007-11-09	11.0707	12.6474	0.669525	0				2007-11-09	12.6312	7.521	-2.16305	0
2007-11-10	7.30764	2.13977	-3.26437	0				2007-11-10	10.7571	9.66229	1.63312	0				2007-11-10	11.9968	8.40677	-2.16724	0
2007-11-11	9.89145	5.11746	-5.07086	0				2007-11-11	6.36677	9.95062	0.456696	0.174255				2007-11-11	11.6415	7.99368	-2.41022	0
2007-11-12	11.1925	2.13681	-6.55167	0				2007-11-12	10.6913	1.46079	-5.229	0				2007-11-12	8.41281	9.05637	-1.09158	0
2007-11-13	11.1004	3.90378	-2.11395	0				2007-11-13	7.58041	7.34638	-1.76367	0				2007-11-13	5.98452	9.80518	-0.279205	0
2007-11-14	5.97656	5.92877	-0.701538	0.0772261				2007-11-14	10.9231	12.6431	-0.535492	0				2007-11-14	10.5956	7.11646	-2.8317	0
2007-11-15	7.13508	13.4011	1.11603	0.0156346				2007-11-15	10.0336	11.2978	1.12787	0				2007-11-15	9.10076	4.33337	-3.47446	0.0214662
2007-11-16	4.0343	8.71793	-0.658844	1.40252				2007-11-16	10.313	7.20911	-7.51636	0.864243				2007-11-16	10.5444	6.70331	-2.14993	0
2007-11-17	9.7915	10.724	-1.10428	0.555004				2007-11-17	10.9935	-4.16544	-10.0209	0				2007-11-17	10.4709	6.71417	-3.18347	0
2007-11-18	6.46235	7.30362	-0.801117	0.140789				2007-11-18	11.3912	1.42749	-8.57504	0				2007-11-18	10.378	5.35266	-3.67316	0.00781904
2007-11-19	9.54914	10.2524	-0.958038	0.00819784				2007-11-19	8.92374	2.98764	-4.31155	0				2007-11-19	5.97157	4.1279	-3.48972	0.105104
2007-11-20	9.2349	13.2303	-1.60336	0				2007-11-20	10.5432	1.4173	-6.16428	0				2007-11-20	7.18241	3.55103	-3.63559	0.0195198
2007-11-21	6.52706	8.08267	-0.961243	0.00950933				2007-11-21	7.14309	7.14639	-3.92429	1.32753				2007-11-21	10.3997	6.90433	-3.09647	0
2007-11-22	4.38464	7.65951	-1.75998	0.105012				2007-11-22	10.1033	-0.430023	-8.67502	0.0170554				2007-11-22	6.77635	10.4464	1.01468	0
2007-11-23	9.16545	7.09244	-2.57654	0				2007-11-23	10.1782	-0.345978	-9.08255	0				2007-11-23	7.81215	8.83166	-0.0361633	0.0289266
2007-11-24	9.60799	9.77823	-2.94363	0				2007-11-24	10.1037	0.718811	-7.2905	0				2007-11-24	6.75742	4.55344	-2.41614	0.00392261
2007-11-25	9.16075	8.36594	-2.30438	0				2007-11-25	9.46814	3.06906	-7.04495	0				2007-11-25	8.74745	1.90414	-4.80283	0
2007-11-26	9.66311	9.35477	-2.21396	0				2007-11-26	9.28706	4.66208	-4.5557	0				2007-11-26	9.64418	5.44308	-2.6239	0
2007-11-27	9.44903	8.46582	-3.70151	0				2007-11-27	9.7257	6.41177	-4.21539	0				2007-11-27	9.63387	5.24161	-2.94665	0
2007-11-28	7.13748	8.61487	-5.64566	0				2007-11-28	7.99485	9.0925	-1.51755	0				2007-11-28	8.59844	6.25778	-5.8555	0.0408953
2007-11-29	8.25102	-1.60782	-11.7927	0				2007-11-29	8.71105	10.2225	-1.02316	0				2007-11-29	4.85184	-3.27622	-10.2893	0.0108718
2007-11-30	9.90322	-7.88	-13.4253	0				2007-11-30	9.15592	8.60031	-1.72537	0				2007-11-30	9.48043	2.35223	-8.04611	0
2007-12-01	3.22249	-4.19516	-13.337	0.00731702				2007-12-01	4.00802	2.20114	-4.12921	0.0150142				2007-12-01	9.50861	3.75198	-4.18823	0
2007-12-02	7.50384	-1.13571	-9.47372	0				2007-12-02	2.3545	-0.953888	-8.44211	0				2007-12-02	9.10285	3.4718	-4.37045	0
2007-12-03	6.86741	-0.218536	-7.76465	0				2007-12-03	4.6799	-2.37332	-11.0265	0				2007-12-03	9.18531	4.49484	-3.53055	0
2007-12-04	8.47712	4.49448	-7.35074	0				2007-12-04	9.60852	-5.79941	-14.2009	0				2007-12-04	5.83923	-2.16928	-6.81235	0
2007-12-05	4.42182	3.26651	-4.98428	0				2007-12-05	9.49741	-4.5235	-12.565	0				2007-12-05	2.24783	1.88962	-8.07461	0.232536
2007-12-06	6.5307	6.31067	-7.27591	0.02601				2007-12-06	8.52997	-4.09189	-13.3673	0				2007-12-06	4.97251	-0.336548	-6.15543	0.329904
2007-12-07	5.40345	-2.76233	-11.7474	0.0229837				2007-12-07	6.16839	-0.92038	-10.7016	0				2007-12-07	5.40269	-1.50183	-10.6214	0.0230322
2007-12-08	7.68388	-8.55911	-15.6735	0				2007-12-08	8.97509	2.04092	-8.26956	0				2007-12-08	8.13043	-4.20093	-12.7708	0
2007-12-09	9.59426	-8.32736	-16.7968	0				2007-12-09	8.7506	5.29837	-7.33322	0				2007-12-09	7.88456	-1.87295	-11.3974	0.0519692
2007-12-10	9.87143	-6.49939	-15.2168	0				2007-12-10	5.76435	1.57306	-6.87521	0.0860143				2007-12-10	3.59116	-1.48377	-9.43192	0.0840397
2007-12-11	9.3149	-2.7391	-15.1349	0				2007-12-11	4.17327	-4.21445	-11.7157	0				2007-12-11	5.91535	-4.53406	-11.9621	0.0290615
2007-12-12	8.51263	-2.45108	-11.3957	0				2007-12-12	6.22847	-4.02924	-14.7515	0				2007-12-12	4.99859	-2.24442	-11.4768	0
2007-12-13	8.60389	0.815094	-12.0028	0				2007-12-13	8.78742	-1.82275	-11.273	0				2007-12-13	8.70462	-0.25766	-8.98871	0
2007-12-14	8.04595	1.39633	-10.6691	0				2007-12-14	7.91315	-2.90982	-11.9788	0				2007-12-14	3.81652	-0.220215	-8.85095	0
2007-12-15	5.22212	2.49622	-8.07819	0				2007-12-15	8.87618	-3.76886	-13.4425	0				2007-12-15	8.91182	1.17236	-8.91104	0
2007-12-16	8.1741	0.301544	-9.17838	0				2007-12-16	8.80006	-3.75055	-13.9692	0				2007-12-16	5.79001	0.838013	-8.28567	0
2007-12-17	7.3653	-1.21542	-10.6366	0				2007-12-17	8.83313	-5.65213	-16.4639	0				2007-12-17	5.74868	0.654266	-8.83652	0
2007-12-18	5.89271	0.158051	-9.89017	0				2007-12-18	8.1912	-8.15811	-17.6193	0				2007-12-18	5.17077	-0.289703	-8.62479	0.0704365
2007-12-19	8.051	3.53723	-8.93704	0				2007-12-19	8.7394	-6.01901	-16.9165	0				2007-12-19	8.18635	0.624023	-9.67966	0
2007-12-20	7.82056	1.56442	-6.97366	0				2007-12-20	8.10678	-2.89465	-13.9353	0				2007-12-20	6.31934	-1.42047	-10.2797	0
2007-12-21	8.35441	0.0584106	-9.11484	0				2007-12-21	7.455	-0.407288	-12.7605	0				2007-12-21	3.97864	-0.448822	-11.2595	0
2007-12-22	8.72978	3.17255	-10.7343	0				2007-12-22	9.05301	-5.67044	-14.7119	0				2007-12-22	8.54583	2.026	-10.1159	0
2007-12-23	6.79927	1.08502	-7.19739	0				2007-12-23	8.71227	-5.62897	-15.9074	0				2007-12-23	6.31633	-5.29004	-14.1239	0
2007-12-24	5.26377	2.24545	-6.14078	0				2007-12-24	8.04181	-5.21432	-14.2388	0				2007-12-24	8.43343	-5.55383	-16.2929	0
2007-12-25	2.8887	0.360077	-8.01874	0				2007-12-25	8.65156	-2.83521	-12.8921	0				2007-12-25	8.67621	-9.14639	-17.7069	0
2007-12-26	7.80656	1.6109	-8.65414	0				2007-12-26	8.82005	-3.50326	-12.916	0				2007-12-26	8.45916	-10.7921	-18.6068	0
2007-12-27	8.14618	4.27936	-7.46481	0.0159145				2007-12-27	6.61293	-0.0136414	-10.5985	0				2007-12-27	7.34069	-10.5006	-20.9453	0
2007-12-28	6.92249	-1.65683	-10.3181	0				2007-12-28	8.43559	0.192474	-11.0113	0				2007-12-28	8.34928	-8.66058	-19.3445	0
2007-12-29	4.63758	-3.85696	-12.284	0				2007-12-29	6.51352	0.415497	-11.3487	0.00837988				2007-12-29	8.91836	-8.33765	-19.8791	0
2007-12-30	6.09573	-5.43356	-14.7289	0.00716623				2007-12-30	6.51839	-5.94934	-19.0807	0.0145422				2007-12-30	9.19925	-3.91397	-16.3676	0
2007-12-31	8.61355	-6.58328	-15.9331	0				2007-12-31	8.06532	-11.6384	-23.3202	0				2007-12-31	8.81571	0.482422	-14.0473	0
2008-01-01	8.7038	-1.1702	-14.54	0				2008-01-01	9.17346	-10.0383	-22.4939	0				2008-01-01	6.54616	4.42996	-8.65909	0
2008-01-02	8.22274	0.330078	-12.6064	0				2008-01-02	9.29921	-5.41968	-17.4612	0				2008-01-02	7.52137	-2.59827	-13.1706	0
2008-01-03	5.08611	0.280792	-11.6894	0.0181166				2008-01-03	9.00426	-4.15588	-15.2853	0				2008-01-03	8.97038	-2.28229	-14.2428	0
2008-01-04	7.4087	-1.32935	-9.73556	0.0174498				2008-01-04	6.35796	-6.5621	-15.2407	0				2008-01-04	8.30987	2.05777	-9.20194	0
2008-01-05	5.55621	4.24442	-9.16626	0.0675247				2008-01-05	8.93526	-6.19644	-16.0928	0				2008-01-05	4.17933	0.774506	-6.90497	0
2008-01-06	7.56572	-0.197418	-14.1027	0.0825105				2008-01-06	9.07434	-2.017	-13.6039	0				2008-01-06	8.42475	3.41486	-6.19369	0
2008-01-07	9.57523	-7.93442	-15.8178	0				2008-01-07	7.65595	-2.46979	-12.8563	0				2008-01-07	5.4934	-0.368713	-8.24823	0
2008-01-08	9.32214	-2.52386	-16.9392	0				2008-01-08	7.87792	-6.18686	-15.8411	0				2008-01-08	2.56204	-7.81363	-16.0406	0
2008-01-09	8.71785	0.366058	-13.2508	0				2008-01-09	9.37344	-7.34671	-17.3806	0				2008-01-09	8.42405	-4.5466	-15.7548	0
2008-01-10	4.15815	1.89264	-9.2883	0				2008-01-10	9.36253	-6.02988	-16.7849	0				2008-01-10	8.73233	1.91074	-11.8056	0
2008-01-11	8.58032	2.29947	-8.64352	0				2008-01-11	9.4658	-5.55887	-15.8439	0				2008-01-11	7.84124	3.54465	-7.66409	0
2008-01-12	8.95986	2.11966	-12.1557	0				2008-01-12	9.63907	-3.79523	-15.8578	0				2008-01-12	4.96131	-0.271149	-7.29388	0
2008-01-13	7.61782	-3.50436	-13.5977	0				2008-01-13	9.67893	-3.14697	-15.1778	0				2008-01-13	6.39041	-2.62598	-13.0199	0
2008-01-14	8.62002	-0.347931	-12.0229	0				2008-01-14	9.33263	-2.03903	-12.4266	0				2008-01-14	9.07403	3.06287	-11.911	0
2008-01-15	6.44488	-1.38077	-12.9472	0				2008-01-15	10.1735	-2.29373	-13.8061	0				2008-01-15	9.37857	5.30966	-6.74368	0
2008-01-16	4.69275	-3.03	-12.9359	0				2008-01-16	7.55797	0.469757	-11.0655	0				2008-01-16	5.916	3.36435	-7.93814	0
2008-01-17	9.88748	-1.47925	-14.0702	0				2008-01-17	8.04029	2.07632	-9.18604	0				2008-01-17	4.90185	0.70282	-7.8746	0.0397784
2008-01-18	9.86125	-0.75058	-13.9698	0				2008-01-18	9.21999	3.55096	-6.20642	0				2008-01-18	3.24209	-4.39056	-11.4931	1.62754
2008-01-19	9.08828	-2.05225	-13.6631	0				2008-01-19	9.78955	4.607	-5.18323	0				2008-01-19	1.55032	-6.63409	-15.7352	2.26096
2008-01-20	8.91354	-5.1149	-15.6638	0				2008-01-20	9.35456	3.77219	-5.14414	0				2008-01-20	6.85602	-9.85941	-19.9226	0.119105
2008-01-21	7.54331	-3.84192	-15.4523	0				2008-01-21	5.41615	12.3045	-6.73184	0				2008-01-21	7.06214	-12.9305	-21.0782	0.118298
2008-01-22	9.28487	-11.6733	-19.9508	0				2008-01-22	8.34405	6.24545	-4.34189	0				2008-01-22	11.5911	-13.4601	-22.5848	0
2008-01-23	11.3115	-12.8957	-21.9908	0				2008-01-23	9.92971	-0.216278	-10.4491	0				2008-01-23	11.1441	-4.11362	-15.9562	0
2008-01-24	11.0277	-2.66953	-18.932	0				2008-01-24	10.0408	-2.86401	-13.3183	0				2008-01-24	6.48035	-6.80057	-14.8318	0
2008-01-25	10.2828	-5.86536	-16.4464	0				2008-01-25	10.3768	2.79715	-9.59332	0				2008-01-25	11.1293	-0.82489	-12.9859	0
2008-01-26	11.5723	-2.96851	-18.0833	0				2008-01-26	10.5343	2.02838	-10.8429	0				2008-01-26	11.3118	-1.6041	-14.0631	0
2008-01-27	10.8823	-0.778748	-13.2008	0				2008-01-27	10.4067	3.61868	-9.44647	0				2008-01-27	11.33	-1.84048	-14.9416	0
2008-01-28	9.60668	1.64835	-11.6837	0.0666987				2008-01-28	7.96361	4.34903	-7.96378	0				2008-01-28	11.3248	0.65567	-11.6615	0
2008-01-29	9.60668	-6.01779	-14.7385	0.0666987				2008-01-29	7.96361	4.5444	-6.87112	0				2008-01-29	11.3248	1.64755	-9.16867	0
2008-01-30	5.60222	-11.962	-16.4665	0.434456				2008-01-30	8.81478	-1.40778	-14.7299	0.0054535				2008-01-30	11.1996	3.70569	-7.81448	0
2008-01-31	11.3649	-2.60675	-18.6643	0				2008-01-31	7.76522	-10.3897	-19.7346	0.0641482				2008-01-31	11.4367	8.61154	-4.61822	0
2008-02-01	12.0613	-4.366	-14.4241	0				2008-02-01	11.4359	-10.55	-22.5201	0				2008-02-01	11.7768	4.00082	-6.09964	0
2008-02-02	11.7392	0.069519	-14.9979	0				2008-02-02	7.24468	-7.60815	-21.0696	0.0278839				2008-02-02	10.0458	-1.56924	-11.4498	0
2008-02-03	11.431	0.346558	-12.4646	0				2008-02-03	12.0907	-8.78281	-19.6662	0				2008-02-03	11.2621	1.40362	-12.5294	0
2008-02-04	11.665	4.15802	-10.8306	0				2008-02-04	12.5061	-5.5278	-17.9396	0				2008-02-04	12.1712	-2.4039	-10.8148	0
2008-02-05	11.7728	2.42831	-8.43628	0				2008-02-05	12.1704	-7.02438	-17.8911	0				2008-02-05	10.3601	3.6264	-10.522	0.00584108
2008-02-06	12.357	3.95062	-9.91293	0				2008-02-06	11.3617	-7.38886	-21.1527	0				2008-02-06	12.2322	2.20163	-8.65747	0
2008-02-07	9.51232	6.16156	-5.15817	0				2008-02-07	12.6975	-1.8223	-15.2029	0				2008-02-07	10.108	-1.91724	-12.3219	0.606276
2008-02-08	10.9119	9.41403	-4.05826	0				2008-02-08	11.7962	1.80289	-11.4831	0				2008-02-08	8.09276	3.02362	-9.16412	0.016068
2008-02-09	10.5625	7.23099	-4.11142	0				2008-02-09	10.3448	4.45065	-8.02243	0				2008-02-09	7.7537	8.01898	-3.36627	0
2008-02-10	5.76423	3.49976	-5.31064	0.848503				2008-02-10	10.8507	4.04025	-8.29691	0				2008-02-10	7.34497	6.22079	-5.77777	0
2008-02-11	12.6209	5.00824	-6.07059	0				2008-02-11	5.16943	2.49499	-8.55179	0.0219332				2008-02-11	12.7337	8.18793	-6.12436	0
2008-02-12	12.5215	1.09271	-6.08664	0.00995359				2008-02-12	8.65834	2.46063	-10.3023	0.0161315				2008-02-12	12.5916	3.86343	-8.01492	0
2008-02-13	7.33606	7.85373	-3.27539	0.00980533				2008-02-13	7.63504	1.18314	-10.5148	0				2008-02-13	13.1669	9.51166	-4.58469	0
2008-02-14	12.5528	8.5079	-3.36273	0.0128735				2008-02-14	12.6899	1.81003	-10.9716	0				2008-02-14	13.5575	4.92062	-6.11404	0
2008-02-15	12.3597	3.37378	-4.22128	0.00589837				2008-02-15	13.9945	3.62674	-8.10275	0				2008-02-15	14.0605	11.0877	-2.89676	0
2008-02-16	12.9361	1.92725	-5.12646	0				2008-02-16	10.7775	-0.201111	-11.636	0				2008-02-16	13.4712	14.6564	0.0843811	0
2008-02-17	10.2476	6.32059	-3.22452	0.0129732				2008-02-17	9.97034	-6.29343	-16.2216	0.037787				2008-02-17	10.9598	9.93951	-2.46808	0
2008-02-18	11.9042	9.94806	-4.11642	0				2008-02-18	13.3891	-3.03928	-16.4029	0				2008-02-18	3.71737	9.30133	-3.20026	0
2008-02-19	11.9979	4.18701	-4.81686	0				2008-02-19	14.5007	-0.171936	-11.5347	0				2008-02-19	13.6882	15.1087	-0.482452	0
2008-02-20	5.7284	-0.791443	-6.21258	0				2008-02-20	12.1178	2.57239	-10.1889	0				2008-02-20	13.5988	9.08194	-2.38596	0
2008-02-21	0.798751	1.18066	-4.30997	0.147666				2008-02-21	15.7564	3.39645	-7.71695	0				2008-02-21	4.36083	6.78381	-3.29681	0.0211119
2008-02-22	4.15768	1.00342	-5.9194	0.124477				2008-02-22	13.9466	5.77457	-4.97769	0				2008-02-22	13.7081	7.11334	-3.70953	0
2008-02-23	9.81396	0.474243	-5.79553	0				2008-02-23	14.6544	8.24786	-3.99933	0				2008-02-23	15.0647	11.3541	-1.70834	0
2008-02-24	10.9591	0.152344	-8.26071	0.0117138				2008-02-24	14.5953	5.78354	-3.52255	0				2008-02-24	12.0384	13.2999	-0.622131	0
2008-02-25	15.9357	0.758911	-9.81094	0				2008-02-25	14.6323	4.0947	-9.0256	0.010404				2008-02-25	15.5785	6.21197	-9.81485	0
2008-02-26	15.6471	2.5109	-7.5441	0				2008-02-26	14.6124	0.371368	-11.8099	0				2008-02-26	5.81207	-5.16257	-14.3282	0
2008-02-27	12.6093	0.257324	-6.82703	0				2008-02-27	14.8871	0.896576	-10.2929	0.198251				2008-02-27	14.1732	1.28928	-12.9779	0
2008-02-28	12.2561	5.53528	-5.36163	0.00682885				2008-02-28	8.52701	5.56192	-6.74545	0.266249				2008-02-28	16.6369	6.35501	-5.65973	0
2008-02-29	13.9687	5.53528	-5.36163	0				2008-02-29	13.0127	5.56192	-6.74545	0.0155338				2008-02-29	16.8226	6.35501	-5.65973	0
2008-03-01	14.5058	8.92325	-5.58292	0.245216				2008-03-01	11.381	5.80563	-5.47012	0.0201496				2008-03-01	17.1174	5.12997	-6.95364	0
2008-03-02	7.50042	0.849762	-8.41934	0				2008-03-02	13.3499	4.80273	-5.32468	0.0640595				2008-03-02	16.6223	5.63455	-6.18729	0
2008-03-03	18.4725	2.48935	-10.4302	0				2008-03-03	7.94408	4.34308	-6.40036	0				2008-03-03	18.7275	3.14383	-7.76917	0
2008-03-04	18.209	4.3696	-7.00906	0.0182365				2008-03-04	16.211	10.9294	-4.26376	0.0121303				2008-03-04	17.4406	4.67572	-6.33658	0
2008-03-05	14.018	14.8626	-3.31012	0.0406447				2008-03-05	8.63617	-1.53888	-9.3692	1.55475				2008-03-05	17.8335	8.80597	-4.1091	0
2008-03-06	16.9213	14.8969	-1.01913	0				2008-03-06	17.6824	0.346527	-12.1604	0				2008-03-06	13.5381	7.35016	-1.80804	0.0193374
2008-03-07	16.3906	17.4737	-1.44128	0				2008-03-07	16.4262	4.94562	-6.74338	0				2008-03-07	10.1219	8.51489	-3.26895	0.0576105
2008-03-08	16.2195	13.8408	-3.46393	0.465073				2008-03-08	18.9484	4.49872	-5.67551	0				2008-03-08	10.7181	8.77414	-1.271	0.108054
2008-03-09	15.7305	8.80399	-3.74676	0				2008-03-09	18.3293	13.4908	0.31131	0				2008-03-09	17.6825	8.53522	-2.88461	0
2008-03-10	6.82833	5.88812	-3.10385	1.67388				2008-03-10	18.6067	9.06235	-0.69574	0				2008-03-10	16.7861	9.42972	-1.77631	0
2008-03-11	17.5698	4.13803	-5.64505	0.145527				2008-03-11	14.1456	11.2962	-1.95859	0.147035				2008-03-11	18.5268	14.1304	1.52786	0
2008-03-12	13.5935	2.50693	-6.51062	0.0657813				2008-03-12	17.8501	14.2009	1.15707	0				2008-03-12	14.9125	24.6473	6.95743	0
2008-03-13	11.2214	0.360931	-5.02573	0.148167				2008-03-13	11.3848	14.8591	1.60416	0				2008-03-13	17.1106	20.1234	3.87787	0.014804
2008-03-14	15.002	2.39194	-5.17447	0				2008-03-14	10.3537	12.5382	1.85471	0.0247141				2008-03-14	13.0937	10.6153	-0.591034	0.0445843
2008-03-15	20.2329	6.52689	-2.77777	0				2008-03-15	17.5321	15.094	-0.674713	0.128413				2008-03-15	7.65913	4.34814	-2.00842	2.43221
2008-03-16	19.4417	8.5556	-1.53906	0				2008-03-16	19.6049	1.79117	-5.01474	0				2008-03-16	11.8067	6.10681	-3.13022	0
2008-03-17	18.148	12.6311	-0.9552	0.120018				2008-03-17	19.354	4.82037	-6.73639	0				2008-03-17	14.0745	7.26858	-2.78702	0.0465881
2008-03-18	5.93035	9.1163	1.17596	0.0595403				2008-03-18	19.8423	7.61783	-4.21658	0				2008-03-18	20.7387	20.2191	-0.613312	0
2008-03-19	11.1324	10.5489	1.4787	0.176052				2008-03-19	18.7328	9.26816	-1.17114	0				2008-03-19	18.2984	26.0528	10.6729	0
2008-03-20	11.6086	8.40192	0.0297852	0.0101076				2008-03-20	18.2963	7.9707	-0.651367	0				2008-03-20	8.6291	15.1623	7.10336	0.0515109
2008-03-21	14.8997	12.2786	0.0719299	0.0843044				2008-03-21	17.3591	12.6824	0.228638	0.15756				2008-03-21	4.12988	10.1742	2.31311	0.173539
2008-03-22	20.2708	13.2293	-0.260681	0.00964181				2008-03-22	13.8556	9.56702	0.110138	0.233174				2008-03-22	14.3972	11.701	2.0723	0
2008-03-23	19.7608	13.1639	3.89716	0.0251692				2008-03-23	4.87726	7.25571	-1.26093	0.110099				2008-03-23	16.5925	14.2479	1.84766	0
2008-03-24	20.2821	15.5236	0.635406	0				2008-03-24	13.4179	6.78952	-3.23831	0.0327874				2008-03-24	20.6786	18.1112	5.09088	0
2008-03-25	21.7852	9.40341	-2.0654	0				2008-03-25	12.6031	7.25702	-3.23929	0.0538918				2008-03-25	14.3773	13.0155	2.39752	0.0548803
2008-03-26	21.3037	14.6028	-1.91049	0				2008-03-26	16.4458	8.87881	-2.72897	0.611713				2008-03-26	16.1059	11.7937	0.682342	0.0871906
2008-03-27	15.233	13.0617	-1.99225	0.0201557				2008-03-27	16.146	11.5874	-1.23935	0.0325589				2008-03-27	13.3319	13.9362	3.60861	0.900024
2008-03-28	22.9587	7.15512	-2.91589	0				2008-03-28	19.8031	15.8282	2.54605	0				2008-03-28	8.43968	12.9724	3.87894	0.796415
2008-03-29	17.0242	10.9516	0.444397	0				2008-03-29	21.0949	15.0591	3.29361	0				2008-03-29	10.7757	8.51096	-1.61774	0.163093
2008-03-30	17.4415	9.33899	0.071991	0				2008-03-30	20.5519	15.6224	3.5499	0.076116				2008-03-30	13.7507	5.9068	-3.46549	0.0879068
2008-03-31	23.2921	13.3488	1.0896	0				2008-03-31	4.53952	9.76422	1.76492	0.176444				2008-03-31	13.1195	7.56058	-1.02029	0.0750561
2008-04-01	23.8153	15.8198	1.48862	0				2008-04-01	15.1258	11.3817	2.58493	0.42827				2008-04-01	13.372	7.8855	-0.798889	0
2008-04-02	18.5192	15.6656	3.16104	0.0701255				2008-04-02	15.8218	12.9739	1.60178	0.246442				2008-04-02	21.2548	11.2771	0.690521	0.163553
2008-04-03	18.9206	19.3449	3.82782	0.0584877				2008-04-03	13.6828	9.98752	-2.63431	0				2008-04-03	21.275	14.9856	2.58737	0.336466
2008-04-04	20.714	19.679	4.1257	0				2008-04-04	14.5137	11.1655	0.493622	0				2008-04-04	22.1108	14.7095	4.43356	0
2008-04-05	12.4717	21.0146	6.34549	0.127173				2008-04-05	14.9475	11.0735	1.09833	0.19455				2008-04-05	22.4506	16.7712	5.35825	0
2008-04-06	21.2944	13.5858	4.59116	0				2008-04-06	9.15981	10.0302	0.130463	0.460396				2008-04-06	18.1672	15.2213	1.42438	0
2008-04-07	16.8365	13.3155	1.69318	0				2008-04-07	20.8435	14.8725	1.12192	0.211193				2008-04-07	22.4145	14.4266	2.47501	0.263908
2008-04-08	17.8158	13.0218	1.80701	0.135922				2008-04-08	16.0966	14.435	0.374878	0.0175319				2008-04-08	4.35937	9.62555	3.02121	3.91504
2008-04-09	14.946	12.0274	2.88464	1.04554				2008-04-09	23.8407	13.9139	2.6239	0				2008-04-09	22.0069	16.8843	4.27243	0
2008-04-10	6.87211	10.7665	5.28079	0.609546				2008-04-10	16.5285	14.9163	2.17481	0.198213				2008-04-10	22.0551	19.1405	5.02692	0
2008-04-11	23.2024	14.5542	2.30707	0				2008-04-11	23.0144	6.7717	-0.984283	0				2008-04-11	20.6567	7.73746	1.82819	0
2008-04-12	25.4228	15.5565	2.25275	0				2008-04-12	25.1631	7.9885	-0.278809	0				2008-04-12	24.2223	17.885	4.88715	0
2008-04-13	25.2041	17.3807	3.39172	0				2008-04-13	25.414	10.3832	0.891998	0				2008-04-13	18.2545	13.3403	1.87753	0
2008-04-14	23.6208	21.7481	7.0806	0.00327837				2008-04-14	24.7325	16.6574	4.23538	0				2008-04-14	22.9276	16.9019	2.87869	0
2008-04-15	26.0359	21.3076	9.00137	0				2008-04-15	23.7629	18.2469	8.36771	0				2008-04-15	23.1358	19.8778	8.22931	0
2008-04-16	21.4883	23.1996	6.62625	0				2008-04-16	23.9274	18.0774	7.4722	0				2008-04-16	21.1836	22.5776	10.0493	0.00477375
2008-04-17	18.1332	12.7208	4.6311	0.0444623				2008-04-17	19.9935	15.822	5.50229	0.0549501				2008-04-17	19.6867	16.1473	3.83661	0.0389476
2008-04-18	21.6565	12.2773	2.27805	0				2008-04-18	25.2372	13.5434	4.46948	0				2008-04-18	24.3929	14.9691	4.03558	0
2008-04-19	16.4862	15.0882	2.92783	0.30466				2008-04-19	22.1513	11.6545	2.88071	0.131331				2008-04-19	24.4948	23.4574	10.375	0.00894838
2008-04-20	12.8618	12.9013	4.16037	0.044216				2008-04-20	21.8582	8.32696	1.84616	0.034674				2008-04-20	22.7027	28.0213	13.1569	0.0188054
2008-04-21	25.7841	17.9966	4.51865	0				2008-04-21	20.7553	9.05264	1.80319	0.0415388				2008-04-21	24.1191	29.4302	15.5212	0
2008-04-22	23.2588	20.8615	7.51672	0				2008-04-22	23.8869	15.941	1.19196	0				2008-04-22	19.7296	26.0309	12.1611	0.0269077
2008-04-23	23.0332	22.722	8.44934	0				2008-04-23	26.0018	8.01242	-0.679748	0				2008-04-23	17.2152	14.9898	4.92816	0
2008-04-24	27.5736	22.4343	8.34702	0				2008-04-24	26.7636	10.3212	-0.0647278	0				2008-04-24	25.6944	15.7338	5.82889	0
2008-04-25	25.7993	25.4621	10.256	0				2008-04-25	27.2072	11.7995	1.86755	0				2008-04-25	26.4826	16.0292	6.24301	0
2008-04-26	22.9273	27.963	12.787	0.027776				2008-04-26	26.5099	18.9786	5.82565	0				2008-04-26	26.0099	19.0856	7.93649	0
2008-04-27	19.6924	23.5333	12.1288	0.0464666				2008-04-27	25.4194	22.3536	9.84012	0.0366427				2008-04-27	21.1417	22.4474	8.59045	0
2008-04-28	25.3832	26.4627	14.1899	0				2008-04-28	26.0005	25.4951	13.0037	0.0709619				2008-04-28	26.9842	15.5132	5.50235	0
2008-04-29	18.4135	23.5915	13.268	0				2008-04-29	25.628	22.8798	12.5872	0				2008-04-29	26.369	18.5921	7.08951	0
2008-04-30	10.1362	21.6722	13.3326	0.201331				2008-04-30	26.9712	28.0891	14.349	0				2008-04-30	15.4586	17.8619	7.44064	0
2008-05-01	12.1799	18.6303	8.6463	0.11914				2008-05-01	25.999	30.1968	15.8285	0				2008-05-01	21.5955	24.9347	11.1915	0.0521833
2008-05-02	27.377	17.3296	6.11069	0				2008-05-02	9.88162	20.0563	13.4652	0.880844				2008-05-02	24.8579	20.1715	8.72437	0.0318777
2008-05-03	27.3376	24.8773	8.78992	0				2008-05-03	24.1637	28.6459	14.1616	0.0356227				2008-05-03	22.9784	20.361	9.02676	0.0856363
2008-05-04	25.5561	27.4162	15.1586	0.0325616				2008-05-04	15.1654	25.4871	13.2439	0				2008-05-04	16.1341	17.8912	8.82416	0.314496
2008-05-05	7.78538	12.3749	6.24924	1.29713				2008-05-05	14.5334	24.678	14.3528	0.272735				2008-05-05	23.202	22.9244	9.79202	0.28001
2008-05-06	27.6366	20.8667	8.26578	0				2008-05-06	14.4018	21.5397	10.7484	5.32501				2008-05-06	19.4782	21.6906	10.1675	0
2008-05-07	27.9146	24.9699	11.143	0				2008-05-07	10.4376	16.4526	9.27216	1.76435				2008-05-07	9.66556	15.3663	8.69742	0
2008-05-08	25.2678	29.8432	13.859	0.00493931				2008-05-08	17.2916	13.7804	7.83066	0.0545794				2008-05-08	24.8361	21.8702	11.9675	0
2008-05-09	21.3903	19.8107	14.0328	1.96733				2008-05-09	27.8116	16.0721	7.63098	0				2008-05-09	26.5589	27.6847	15.1191	0
2008-05-10	27.06	24.0049	13.8419	0				2008-05-10	26.9954	21.4283	11.5031	0				2008-05-10	22.1851	24.664	14.1441	0.171464
2008-05-11	19.0415	26.8935	15.45	0.0336365				2008-05-11	23.5935	24.9638	12.5878	0.0140121				2008-05-11	18.1473	21.3525	13.4696	0.19634
2008-05-12	29.4506	20.9095	9.17065	0				2008-05-12	23.2842	25.4996	15.6547	0.135086				2008-05-12	21.2422	24.0571	13.145	0.177932
2008-05-13	15.7302	20.2682	9.05484	0.598993				2008-05-13	25.9841	24.1758	13.6714	0.178087				2008-05-13	28.1815	26.8038	14.7248	0.0212935
2008-05-14	26.8899	23.5073	9.80893	0				2008-05-14	25.4936	26.1632	15.8443	0.0560694				2008-05-14	24.9714	26.6796	16.5133	0.830895
2008-05-15	27.4733	27.7988	15.0475	0				2008-05-15	23.394	27.9466	14.5778	0.242102				2008-05-15	19.4222	23.309	12.4616	12.4069
2008-05-16	27.9852	29.5256	16.8775	0				2008-05-16	11.4998	19.5067	12.5899	2.58412				2008-05-16	19.3708	20.6564	11.9031	1.18564
2008-05-17	26.9072	28.8082	16.7166	0				2008-05-17	27.7051	25.7114	14.7444	0				2008-05-17	17.3837	19.3993	11.044	0.259927
2008-05-18	23.1715	24.9379	16.9078	0.264729				2008-05-18	24.944	24.3705	14.7642	0.170869				2008-05-18	28.25	20.4453	9.61435	0
2008-05-19	16.5669	24.8788	15.2271	4.61105				2008-05-19	19.3497	21.4962	13.2273	1.78929				2008-05-19	28.9544	21.0719	12.009	0
2008-05-20	20.8381	21.6963	12.4374	0.599499				2008-05-20	26.4587	24.0659	13.8788	0				2008-05-20	28.4539	27.121	14.9695	0
2008-05-21	13.2521	15.6237	11.151	4.47387				2008-05-21	22.6388	26.0306	13.2034	0				2008-05-21	27.6067	29.1917	16.4495	0
2008-05-22	20.4249	22.0934	11.8496	0				2008-05-22	27.6409	22.0452	12.6653	0				2008-05-22	27.9573	30.0406	19.7102	0
2008-05-23	24.0432	24.9389	14.2584	0				2008-05-23	26.4504	25.9591	15.846	0				2008-05-23	27.898	34.8618	21.2514	0
2008-05-24	21.7171	24.5098	16.0605	0				2008-05-24	26.6209	26.8241	17.3924	0.0177492				2008-05-24	23.5759	32.2653	21.4616	0
2008-05-25	20.7062	24.9949	16.2131	0				2008-05-25	24.6354	25.6909	11.9491	0.247621				2008-05-25	19.6845	28.2217	19.1923	3.89009
2008-05-26	28.58	26.3206	14.0257	0				2008-05-26	25.6959	21.352	11.7381	0.280081				2008-05-26	12.3884	23.8536	16.3922	4.61987
2008-05-27	25.6543	21.7497	13.2593	0				2008-05-27	29.5346	22.8539	12.7671	0				2008-05-27	16.5365	24.9724	18.1113	6.88744
2008-05-28	25.1978	22.7178	14.1161	0				2008-05-28	29.0619	26.0163	14.9919	0				2008-05-28	15.131	24.398	17.4254	0.446125
2008-05-29	24.741	20.8143	15.1495	0.044409				2008-05-29	27.3277	27.6711	15.8847	0				2008-05-29	13.4896	21.3666	15.9829	0.190237
2008-05-30	26.5286	27.2013	16.9084	0.0645284				2008-05-30	22.7764	28.6432	15.669	0				2008-05-30	12.9307	21.5663	15.1422	1.96137
2008-05-31	17.1289	25.1223	15.4342	0.054366				2008-05-31	22.1285	28.8191	15.4779	1.01382				2008-05-31	13.0307	18.8553	12.5186	1.01697
2008-06-01	23.2879	23.0338	10.6768	0				2008-06-01	3.04047	18.795	11.9248	11.85				2008-06-01	15.4437	19.6845	13.2451	0.165692
2008-06-02	29.2018	25.3856	12.7262	0				2008-06-02	23.7686	23.1683	13.6552	0.193798				2008-06-02	24.7979	24.9977	15.3973	0.114393
2008-06-03	24.7891	27.877	16.1572	0				2008-06-03	25.7867	23.9004	14.2638	0				2008-06-03	28.047	27.7495	15.1081	0
2008-06-04	25.725	29.0241	17.6295	0.0971432				2008-06-04	12.0175	19.1257	13.9729	0.537743				2008-06-04	29.0061	21.0356	11.574	0
2008-06-05	18.0008	28.2886	18.4064	0.428153				2008-06-05	19.4093	20.5732	13.4351	0.555684				2008-06-05	27.692	21.2932	11.6334	0
2008-06-06	18.2852	27.0948	18.0912	0.0976335				2008-06-06	27.8585	23.1892	13.1484	0.238963				2008-06-06	28.7364	24.2824	14.7688	0
2008-06-07	26.1001	26.8767	16.9733	0				2008-06-07	26.6929	25.1155	14.6315	0				2008-06-07	19.3167	23.1592	15.4511	0.0735275
2008-06-08	28.6252	30.4656	17.7605	0.0766258				2008-06-08	27.3099	26.2314	16.8809	0.120123				2008-06-08	27.0615	26.7333	16.6126	0
2008-06-09	29.3714	31.3386	19.9636	0				2008-06-09	27.9591	27.3878	15.2603	0				2008-06-09	27.1475	27.7376	18.0752	0.0328024
2008-06-10	27.7944	30.0276	19.6347	0				2008-06-10	27.7347	28.8294	17.982	0				2008-06-10	19.6322	24.103	16.8999	0.230634
2008-06-11	23.71	28.6594	20.621	0.314787				2008-06-11	26.3718	31.1172	17.6534	0.0929599				2008-06-11	15.6456	24.8616	16.4596	0.644845
2008-06-12	16.3217	24.8882	16.795	2.06317				2008-06-12	25.432	31.6971	20.1683	0.0382943				2008-06-12	18.6083	25.7703	17.9817	0.0250161
2008-06-13	25.6404	22.852	15.9107	0				2008-06-13	13.5189	26.2748	18.5175	1.24615				2008-06-13	10.8042	27.1763	17.5726	0.231969
2008-06-14	28.5365	29.8475	18.2223	0				2008-06-14	15.8647	26.0317	17.4198	0.344382				2008-06-14	25.8818	28.0163	19.0444	0.00782161
2008-06-15	26.7004	34.6686	18.9547	0				2008-06-15	19.8853	28.7342	17.0701	0				2008-06-15	18.1074	28.1188	17.6766	2.20757
2008-06-16	28.5424	34.5591	16.7345	0				2008-06-16	27.4981	27.6734	16.167	0				2008-06-16	27.6384	24.58	15.872	0
2008-06-17	22.5076	30.7433	18.7816	0				2008-06-17	30.6354	30.0156	17.7867	0				2008-06-17	26.8196	27.2621	18.2973	0.125329
2008-06-18	16.2291	27.1646	19.3004	1.53782				2008-06-18	30.077	26.3158	15.6232	0				2008-06-18	26.4629	27.82	18.4302	1.25742
2008-06-19	20.801	30.5493	20.1316	3.17425				2008-06-19	30.6701	26.3218	15.6847	0				2008-06-19	22.4481	29.3066	20.7152	0
2008-06-20	2.87278	20.7354	15.2544	0				2008-06-20	28.7383	28.2353	18.2468	0				2008-06-20	27.3872	31.0141	19.2345	0
2008-06-21	17.9065	24.8924	16.6475	0				2008-06-21	28.3965	31.0039	19.8055	0				2008-06-21	25.5328	30.3681	19.5138	0
2008-06-22	12.8351	25.705	18.1102	0.0952673				2008-06-22	25.5637	30.0185	19.4876	0				2008-06-22	27.9196	29.7901	21.1059	0.17841
2008-06-23	24.2736	28.0063	20.3337	3.90382				2008-06-23	24.8079	31.6732	21.4892	0				2008-06-23	18.5026	28.671	21.1954	3.92802
2008-06-24	17.4999	26.1861	20.3896	5.81444				2008-06-24	25.6219	31.2317	19.1625	0				2008-06-24	20.8179	26.9778	20.0482	7.86517
2008-06-25	15.2417	21.0009	17.0121	2.20731				2008-06-25	28.7536	28.2336	18.9641	0				2008-06-25	20.0863	26.2687	19.4441	0.0790552
2008-06-26	23.3722	25.7418	16.9424	0.122767				2008-06-26	19.7483	26.8823	17.7064	0.699326				2008-06-26	25.3434	29.6136	18.9494	0.0779593
2008-06-27	25.6723	24.9202	17.1543	0.471662				2008-06-27	10.0341	21.985	16.4807	2.79295				2008-06-27	21.1841	30.423	21.6919	0.0976649
2008-06-28	27.5701	28.3804	19.0179	0.224993				2008-06-28	19.6	23.6915	17.2685	0.76612				2008-06-28	25.7944	32.2274	22.8304	0.823196
2008-06-29	14.1607	25.6647	17.8699	1.19395				2008-06-29	23.113	25.3509	17.7416	1.40415				2008-06-29	22.3644	28.8097	18.6123	0.440933
2008-06-30	28.056	29.439	17.7091	0.174015				2008-06-30	27.8325	27.9315	17.6486	0.532267				2008-06-30	17.4024	24.3596	16.9058	0
2008-07-01	27.5841	31.5618	19.6786	0.079843				2008-07-01	27.7127	31.0712	19.7345	0				2008-07-01	28.0147	25.6734	17.8028	0
2008-07-02	18.0771	29.3234	21.0389	3.42402				2008-07-02	9.21363	25.3139	18.9119	1.35533				2008-07-02	24.5309	28.1549	19.2718	0
2008-07-03	11.3401	22.5108	17.7617	7.86084				2008-07-03	24.0104	30.1001	19.1665	0				2008-07-03	22.4642	28.2258	20.1552	1.0554
2008-07-04	21.9797	24.649	18.2857	4.19568				2008-07-04	26.3078	30.1326	18.9498	0				2008-07-04	20.6643	27.546	19.5082	2.46471
2008-07-05	24.7508	27.058	18.5084	0.107419				2008-07-05	25.018	29.204	19.9153	0.0402738				2008-07-05	24.5396	26.7537	18.3961	0
2008-07-06	22.9149	27.1497	19.2998	2.22707				2008-07-06	16.7749	29.8652	20.1761	1.27501				2008-07-06	15.69	23.9207	17.1375	0
2008-07-07	23.7568	26.3571	18.6043	0				2008-07-07	10.7188	25.8498	18.1901	0.811388				2008-07-07	15.1129	26.2946	19.4296	2.63436
2008-07-08	20.9582	24.599	19.9558	2.56092				2008-07-08	20.591	27.4465	18.7675	0				2008-07-08	19.6779	26.9835	17.723	0.0265467
2008-07-09	0.237098	19.1601	15.5544	1.88106				2008-07-09	24.8641	31.4645	19.3504	0				2008-07-09	25.2658	26.0762	16.3408	0.642146
2008-07-10	29.0971	28.0384	16.451	0				2008-07-10	22.5616	30.0396	20.3549	0				2008-07-10	28.4932	26.7437	17.8857	0.210764
2008-07-11	27.561	29.9422	18.3389	0				2008-07-11	12.2907	29.0782	19.5486	2.82705				2008-07-11	27.5399	26.5137	18.0282	0.0024116
2008-07-12	22.0027	30.5058	19.8581	2.83849				2008-07-12	13.803	22.3733	17.8942	10.4775				2008-07-12	27.005	27.162	16.9116	0.0968055
2008-07-13	4.54312	23.4753	18.7637	3.89173				2008-07-13	6.3282	24.2174	16.6134	20.408				2008-07-13	27.8984	24.6145	15.3897	0
2008-07-14	25.3361	29.0354	19.6575	0.317218				2008-07-14	24.585	25.1099	16.4544	0				2008-07-14	26.6328	25.5997	16.4761	0
2008-07-15	21.3331	26.9081	19.8893	3.47804				2008-07-15	27.5837	27.927	16.4478	0.0343776				2008-07-15	22.8467	27.0748	18.7262	0
2008-07-16	17.6043	24.8517	18.7249	3.76993				2008-07-16	25.0539	28.88	18.0643	0.113551				2008-07-16	20.1346	26.8723	19.2491	0
2008-07-17	23.1254	26.0744	18.5736	8.53585				2008-07-17	18.6128	27.9906	19.6696	0.0817411				2008-07-17	20.9008	27.6401	19.819	0.241239
2008-07-18	20.6384	24.9728	17.9098	0.892614				2008-07-18	19.062	29.3359	18.8223	0				2008-07-18	19.9876	27.2629	20.3856	0.495892
2008-07-19	25.5643	26.3727	19.1332	0.67589				2008-07-19	21.6787	30.3051	21.0673	0.0331514				2008-07-19	12.6071	25.9059	19.4789	0.899724
2008-07-20	26.0994	31.3786	20.8319	0.276701				2008-07-20	22.7411	31.4451	20.5655	1.02228				2008-07-20	20.3478	27.1465	19.5855	0.363013
2008-07-21	18.22	30.3801	22.4214	0.028862				2008-07-21	15.1928	24.4949	18.474	2.67553				2008-07-21	16.8962	25.3121	18.4058	0.272996
2008-07-22	21.464	27.7748	20.0312	2.12929				2008-07-22	7.11592	22.1963	16.6652	3.00735				2008-07-22	27.7263	27.9097	18.6377	0
2008-07-23	19.1177	25.3339	20.5123	1.33847				2008-07-23	23.2897	23.1019	17.1018	5.14417				2008-07-23	27.7981	29.4953	19.88	0.0446243
2008-07-24	23.7665	29.1194	21.8616	0.862093				2008-07-24	27.991	28.2036	17.5092	0				2008-07-24	26.0256	29.2587	20.2027	0.120969
2008-07-25	25.6256	30.068	22.2678	0				2008-07-25	28.0484	29.4946	17.7991	0				2008-07-25	23.3967	29.6636	20.076	0.0376058
2008-07-26	21.5906	29.4526	23.3311	1.07671				2008-07-26	25.0402	27.8014	17.3077	0				2008-07-26	6.96442	26.9987	20.2849	1.51675
2008-07-27	22.4586	29.3412	22.1186	5.51882				2008-07-27	20.7845	25.0232	17.741	0				2008-07-27	8.08133	26.0928	20.4803	19.502
2008-07-28	8.77618	26.4648	20.9869	1.15529				2008-07-28	26.5525	26.9482	16.0434	0.40367				2008-07-28	16.4319	26.0586	18.3436	0.196635
2008-07-29	20.8184	31.0293	22.4601	1.04144				2008-07-29	27.6336	29.4478	18.1803	0				2008-07-29	27.5551	27.6535	18.2895	0
2008-07-30	21.4795	29.2242	19.9649	2.68587				2008-07-30	17.7248	27.6437	18.8694	0.0619866				2008-07-30	27.5422	28.9041	17.5426	0
2008-07-31	23.5375	31.2978	21.1669	3.56795				2008-07-31	13.6158	24.8981	16.4392	0.076729				2008-07-31	27.0598	28.9898	19.5512	0
2008-08-01	7.86956	19.2124	14.4137	4.91213				2008-08-01	26.6739	31.3993	21.1939	0				2008-08-01	19.7658	28.3609	20.521	0
2008-08-02	28.0703	24.7785	14.8398	0				2008-08-02	23.1463	32.9166	21.2144	0				2008-08-02	18.44	27.686	18.3132	0
2008-08-03	26.1611	24.4254	16.3758	0				2008-08-03	22.9982	31.4642	19.7333	0.566006				2008-08-03	24.7161	28.458	20.3218	0
2008-08-04	24.9765	25.3044	16.9795	0				2008-08-04	8.15479	23.3599	18.2677	6.82987				2008-08-04	21.069	27.4824	20.2899	0.088636
2008-08-05	21.9572	25.6222	17.1729	0				2008-08-05	25.5167	28.8599	17.5215	0.0246592				2008-08-05	9.63328	22.6279	17.981	0.384299
2008-08-06	17.6883	23.2278	18.1487	0.0489961				2008-08-06	26.2949	28.7781	18.1869	0				2008-08-06	17.2001	23.5252	17.5825	0.150144
2008-08-07	20.1708	25.8206	19.0446	1.96083				2008-08-07	21.986	26.1373	17.3985	0				2008-08-07	7.63229	18.9866	15.7149	2.02434
2008-08-08	12.3625	24.7383	18.842	2.72725				2008-08-08	20.8654	25.9966	18.6302	0.183126				2008-08-08	22.1551	27.4478	16.8058	0
2008-08-09	21.9076	26.4244	19.5385	0.515812				2008-08-09	23.575	28.3283	20.2169	0.22487				2008-08-09	27.686	27.4527	15.3205	0
2008-08-10	17.7259	24.8889	19.9578	2.70545				2008-08-10	8.85088	23.9398	16.9064	4.63764				2008-08-10	26.7634	28.25	17.0133	0
2008-08-11	14.8472	25.3756	18.9893	5.8027				2008-08-11	22.84	27.2957	17.954	0				2008-08-11	25.6175	29.3285	19.4682	0.879643
2008-08-12	24.3103	28.3409	16.296	0.0251212				2008-08-12	23.5261	30.4264	17.5964	0.178901				2008-08-12	25.7503	26.2116	16.8087	0
2008-08-13	14.2312	25.1187	16.8594	0.169944				2008-08-13	27.3436	29.4064	18.4018	0				2008-08-13	26.3699	26.5084	16.7667	0
2008-08-14	18.131	24.7187	16.5054	0.131053				2008-08-14	24.3388	27.0309	17.4372	0.0809497				2008-08-14	26.1401	27.9185	19.0184	0
2008-08-15	22.7214	29.3102	16.2496	0				2008-08-15	22.6618	27.8393	18.2722	0				2008-08-15	24.6781	29.1362	18.2694	0
2008-08-16	20.4252	27.9126	14.6028	0.458531				2008-08-16	20.9944	28.2888	19.1193	0.158066				2008-08-16	23.1464	29.0543	19.9435	0
2008-08-17	15.0157	20.2393	14.0567	0.160622				2008-08-17	18.0002	26.5915	18.7257	0.127273				2008-08-17	23.1712	28.2181	19.7103	0.100854
2008-08-18	25.1087	24.3206	14.7039	0				2008-08-18	23.6737	29.6425	19.3571	0.21423				2008-08-18	19.0591	26.4636	18.9454	1.62965
2008-08-19	25.8979	26.0348	15.6317	0				2008-08-19	21.4534	29.5914	19.7617	0.164935				2008-08-19	7.912	22.6977	16.8325	2.0604
2008-08-20	25.566	27.6613	17.7111	0				2008-08-20	13.5462	28.6205	20.5915	0.162459				2008-08-20	22.0956	26.6205	17.8192	0.0412638
2008-08-21	22.0624	25.8907	16.9359	0				2008-08-21	19.2119	27.6547	19.2052	0.0768891				2008-08-21	20.2525	28.3242	18.0047	0
2008-08-22	22.9998	25.5689	17.3298	0				2008-08-22	12.1726	28.6637	18.905	0.658495				2008-08-22	25.107	31.8701	18.4646	0
2008-08-23	18.7705	24.214	16.6077	4.89846				2008-08-23	14.3519	28.6437	18.0703	1.26239				2008-08-23	23.5127	33.7916	20.3859	3.29254
2008-08-24	17.9403	23.2824	16.9566	0.0194728				2008-08-24	25.3062	24.9575	16.3093	0				2008-08-24	18.0767	29.4465	18.934	0.568353
2008-08-25	21.3864	26.4424	17.0131	0.0812219				2008-08-25	23.5442	27.6849	17.5645	0				2008-08-25	23.4146	29.6356	19.9699	0.110588
2008-08-26	22.3752	26.342	17.6496	0				2008-08-26	19.9799	30.2204	19.1273	0				2008-08-26	17.264	29.75	17.259	0.00213464
2008-08-27	10.7396	21.794	15.5707	2.32799				2008-08-27	14.4117	26.8327	16.7076	0.180059				2008-08-27	23.7729	30.6865	18.4287	0
2008-08-28	23.7234	26.7832	15.4906	0				2008-08-28	7.04396	19.6014	14.0119	4.14452				2008-08-28	10.02	25.3032	16.7788	1.42043
2008-08-29	21.2334	26.7804	16.5971	0.0914084				2008-08-29	24.2522	26.1975	15.2989	0				2008-08-29	22.8667	31.5253	17.8093	0
2008-08-30	20.4067	28.2331	17.2829	0.0833867				2008-08-30	21.2684	29.5653	18.4939	0.392218				2008-08-30	22.0185	28.77	17.0156	0
2008-08-31	20.0736	25.9112	17.3787	0				2008-08-31	20.2567	24.2327	14.1871	0				2008-08-31	22.6898	26.1114	13.428	0
2008-09-01	19.3865	24.7658	17.3436	0.026593				2008-09-01	23.585	21.4258	13.2972	0				2008-09-01	23.1687	26.898	16.6364	0
2008-09-02	15.5327	24.1193	16.8091	2.04097				2008-09-02	15.7231	23.017	14.7051	1.23999				2008-09-02	21.3235	28.5111	18.9556	0.245203
2008-09-03	12.6793	17.1718	11.743	1.1594				2008-09-03	17.4957	23.1986	15.6538	0.115263				2008-09-03	16.1621	26.2414	17.6794	0.093968
2008-09-04	9.82601	18.0523	8.84891	1.04367				2008-09-04	18.0798	27.6413	16.8485	0.342816				2008-09-04	15.3123	24.8816	15.5808	0.0185202
2008-09-05	23.5843	19.8426	9.39224	0				2008-09-05	14.4541	25.5231	16.6698	0				2008-09-05	19.6053	26.4527	15.8634	0.045847
2008-09-06	22.7078	22.6851	10.0344	0				2008-09-06	21.8904	25.556	15.3031	0				2008-09-06	12.5876	22.5468	15.203	0
2008-09-07	20.0859	23.9638	12.7437	0				2008-09-07	21.0692	24.8895	14.4894	0.351293				2008-09-07	6.91083	18.1266	13.7697	1.24549
2008-09-08	8.91051	23.8461	12.57	0.361943				2008-09-08	19.6771	25.5376	14.2544	0				2008-09-08	8.97456	22.0415	14.2226	0.729674
2008-09-09	21.2851	26.0677	13.7491	0.110636				2008-09-09	19.9342	28.4358	15.2608	0				2008-09-09	10.9293	26.1162	16.4287	3.14387
2008-09-10	20.7568	26.114	15.7384	0				2008-09-10	19.7761	28.8504	17.5529	0				2008-09-10	14.8563	24.5693	13.7449	0
2008-09-11	13.0931	22.0488	16.1156	0.034318				2008-09-11	20.3402	28.0051	15.0671	0				2008-09-11	22.3867	24.8053	14.3814	0
2008-09-12	4.50607	18.0272	12.977	2.13142				2008-09-12	22.0932	24.1599	13.3437	0				2008-09-12	14.8405	19.9032	12.8916	0.583137
2008-09-13	18.0117	26.8853	13.0308	1.31849				2008-09-13	20.5899	23.2648	13.5619	0				2008-09-13	11.6275	25.9999	14.4368	1.20886
2008-09-14	6.91958	17.748	10.9148	0.366721				2008-09-14	9.39678	23.7571	13.7556	2.04363				2008-09-14	11.6596	24.1185	14.6888	0.590902
2008-09-15	21.3179	20.882	9.62295	0				2008-09-15	16.0818	21.9018	12.19	0.457372				2008-09-15	12.6778	28.5349	16.8442	4.005
2008-09-16	20.5587	22.0664	9.39972	0				2008-09-16	10.2374	22.3199	11.7194	0.100784				2008-09-16	6.40661	18.6376	12.8449	1.44405
2008-09-17	12.2948	20.431	10.2214	1.70897				2008-09-17	12.5286	23.8162	12.7933	0				2008-09-17	12.7293	19.7383	11.9105	0.272613
2008-09-18	21.2258	20.6985	9.66739	0				2008-09-18	19.3894	26.198	12.7613	0.169767				2008-09-18	18.9096	26.3408	13.1023	0
2008-09-19	20.509	25.9765	9.93533	0				2008-09-19	19.7153	25.6932	13.9729	0.0612164				2008-09-19	19.9221	28.9691	16.3706	0
2008-09-20	11.0603	21.3275	8.28369	1.43967				2008-09-20	17.5824	25.7937	14.3612	0.340652				2008-09-20	15.8712	24.988	12.5528	0.281021
2008-09-21	18.9155	18.5755	5.33627	0.00899681				2008-09-21	15.9401	26.6488	15.3157	0.0308695				2008-09-21	9.76915	17.0984	9.28949	2.44409
2008-09-22	16.7799	17.8174	5.80499	0				2008-09-22	14.128	24.317	10.4616	0.0329592				2008-09-22	7.69023	15.2241	5.34195	0.0977682
2008-09-23	16.6608	20.3213	8.42166	0.210228				2008-09-23	17.8215	17.7589	7.5379	0				2008-09-23	14.343	17.8386	6.80017	0.0316055
2008-09-24	16.0275	20.2443	8.34772	0.048206				2008-09-24	15.8527	15.8528	6.91757	0				2008-09-24	12.9867	18.1735	8.36981	0.122016
2008-09-25	17.4667	19.705	7.88263	0				2008-09-25	10.5951	16.3114	6.38388	0.0439712				2008-09-25	6.64759	14.0126	7.3736	11.6644
2008-09-26	16.8146	21.6557	8.50858	0				2008-09-26	13.9667	20.2832	9.83142	0.154128				2008-09-26	7.07822	13.4556	4.61761	9.87009
2008-09-27	15.1578	22.6898	10.9983	0				2008-09-27	16.0499	19.7991	8.29956	0.0186059				2008-09-27	7.87567	10.7792	3.49811	1.18455
2008-09-28	16.8762	21.4522	10.0478	0.174998				2008-09-28	18.513	21.0018	9.52698	0				2008-09-28	9.79018	11.7619	1.58099	0
2008-09-29	9.42263	17.9673	8.88773	0.279252				2008-09-29	15.1261	22.6518	8.94199	0				2008-09-29	12.8149	15.6393	4.48618	0.0382489
2008-09-30	13.3381	17.0396	7.34323	0				2008-09-30	16.8499	18.2225	8.93399	0				2008-09-30	11.6367	17.9124	6.87347	0
2008-10-01	17.7323	20.4796	6.57175	0				2008-10-01	8.24343	17.3029	6.83914	0.294002				2008-10-01	18.539	19.1966	4.86069	0
2008-10-02	15.1738	17.9655	5.87811	0.0608714				2008-10-02	14.8773	19.021	7.97565	0.109762				2008-10-02	18.339	19.3088	5.63644	0
2008-10-03	15.753	15.723	5.50781	0.0169664				2008-10-03	17.9153	24.1531	10.1678	0				2008-10-03	18.1569	20.3159	7.68936	0
2008-10-04	17.1803	18.4292	5.72678	0.035251				2008-10-04	17.479	20.4434	6.56805	0				2008-10-04	17.3644	21.8631	9.28326	0.0175463
2008-10-05	11.6578	15.5255	7.01938	0				2008-10-05	16.411	17.4955	4.91003	0				2008-10-05	16.9317	23.2483	11.227	0.215287
2008-10-06	16.1375	19.6177	6.58276	0				2008-10-06	16.8437	19.6201	5.9603	0				2008-10-06	17.1682	22.4186	10.2456	0
2008-10-07	14.1845	21.2266	7.67764	0.233179				2008-10-07	15.0731	17.5846	4.31073	0				2008-10-07	9.58494	17.7476	6.93161	0.849113
2008-10-08	10.8774	14.3343	2.27844	0.267341				2008-10-08	13.2015	19.2775	6.99219	0				2008-10-08	11.789	11.7906	1.06808	0.029229
2008-10-09	17.5798	13.8612	1.85257	0.28463				2008-10-09	16.4961	22.1399	9.36789	0				2008-10-09	17.57	13.1327	1.41263	0
2008-10-10	14.6935	12.2291	3.5723	0.0456108				2008-10-10	13.6372	21.1436	10.3817	1.8526				2008-10-10	15.604	12.9958	0.457214	0
2008-10-11	17.292	10.9094	2.27182	0				2008-10-11	10.1478	17.5754	7.84433	0.091905				2008-10-11	11.8051	12.4375	3.63986	0
2008-10-12	16.6044	14.6227	0.363617	0				2008-10-12	14.9223	15.2776	6.93536	0				2008-10-12	16.4332	18.6691	5.82205	0
2008-10-13	16.7569	13.2628	-1.27805	0				2008-10-13	15.7428	17.5623	5.28046	0				2008-10-13	15.8544	21.1381	4.33899	0
2008-10-14	16.4745	17.7733	0.394714	0				2008-10-14	10.3306	14.0552	3.23923	0				2008-10-14	15.8062	22.1705	9.07193	0
2008-10-15	15.8172	20.4208	2.15045	0.0131193				2008-10-15	15.9103	13.9282	2.99536	0				2008-10-15	12.383	24.0819	6.09451	0.0601325
2008-10-16	8.81636	16.6761	5.08411	0.350642				2008-10-16	15.0268	19.7517	6.4859	0				2008-10-16	14.9631	14.9797	0.6857	0
2008-10-17	13.7215	13.0944	1.83054	0.216458				2008-10-17	15.9848	15.9785	4.64645	0				2008-10-17	15.5233	17.6634	3.85104	0
2008-10-18	14.9667	16.6699	0.582642	0				2008-10-18	14.2424	13.7836	3.26508	0				2008-10-18	13.8059	19.0121	6.03861	0.497543
2008-10-19	14.1072	20.7777	6.50128	0				2008-10-19	14.973	17.5503	3.22	0				2008-10-19	14.8807	16.1707	3.90222	0.0296698
2008-10-20	13.339	20.6269	10.0828	0				2008-10-20	13.2213	17.0203	5.90021	0				2008-10-20	12.064	15.1421	3.53928	0
2008-10-21	13.0247	21.4406	8.9502	0.359025				2008-10-21	14.1111	16.4979	6.20584	0				2008-10-21	10.6646	16.1587	3.09384	0.0396771
2008-10-22	10.3298	16.9574	5.28531	0.828827				2008-10-22	3.6712	15.5496	4.49249	0.52521				2008-10-22	14.4563	19.718	5.50192	0.0393336
2008-10-23	13.9442	17.538	4.18063	0.0260892				2008-10-23	6.80491	15.6433	3.45148	1.85552				2008-10-23	14.3448	21.7819	7.16544	0.018384
2008-10-24	14.302	20.7942	3.69974	0				2008-10-24	14.5983	18.8206	4.24689	0				2008-10-24	9.83524	10.2788	-0.741852	0.0161328
2008-10-25	13.4006	19.3059	5.41864	0.249062				2008-10-25	13.8193	16.2576	3.86337	0				2008-10-25	14.3615	10.7596	-4.71973	0
2008-10-26	11.5918	17.0278	5.58835	0.0368175				2008-10-26	13.5067	11.7155	0.0730286	0				2008-10-26	14.124	13.4143	-1.79965	0
2008-10-27	13.7353	22.851	5.0495	0				2008-10-27	13.6063	14.2881	1.06323	0				2008-10-27	13.4001	13.7271	-2.21225	0
2008-10-28	13.7135	21.3499	4.45401	0.0101915				2008-10-28	13.0064	14.1187	1.75415	0				2008-10-28	13.9212	15.5309	0.0294495	0
2008-10-29	10.7083	13.6082	-2.15924	0.406725				2008-10-29	13.9291	9.39416	-3.13226	0				2008-10-29	13.6674	20.61	2.0748	0
2008-10-30	12.6563	7.87451	-2.59955	0				2008-10-30	13.474	17.496	2.00131	0				2008-10-30	13.591	19.4386	5.43573	0
2008-10-31	7.07201	7.45346	-1.73029	0.243605				2008-10-31	12.7341	16.4424	4.77347	0				2008-10-31	13.187	19.2409	4.57883	0
2008-11-01	12.1475	6.78534	-2.93631	0				2008-11-01	12.9251	16.5418	5.61865	0				2008-11-01	12.9618	19.0369	7.96127	0
2008-11-02	13.2581	13.8476	-2.84082	0				2008-11-02	12.7155	18.9623	5.62616	0.106244				2008-11-02	12.8914	22.8756	9.92807	0
2008-11-03	12.2044	18.1522	0.828339	0				2008-11-03	12.6575	13.4217	1.71881	0				2008-11-03	12.4527	22.336	9.55286	0.0491494
2008-11-04	11.8201	16.9173	5.87894	0				2008-11-04	12.7389	11.6305	-0.697784	0				2008-11-04	8.38556	12.3981	-2.19934	0.912787
2008-11-05	10.7847	18.6994	5.38327	0.0352157				2008-11-05	12.8712	13.8062	0.627991	0				2008-11-05	7.51454	6.43527	-5.15308	0.103843
2008-11-06	10.9489	20.9195	4.00369	0				2008-11-06	12.0226	13.822	1.77298	0				2008-11-06	11.572	4.85205	-3.70114	0
2008-11-07	7.5043	18.4731	2.04721	0				2008-11-07	11.1951	16.9738	2.25143	0				2008-11-07	11.5909	5.93368	-3.41391	0
2008-11-08	11.547	15.3313	2.54468	0				2008-11-08	10.3282	17.9096	3.67191	5.06245				2008-11-08	11.2033	7.64633	-3.60819	0
2008-11-09	7.44854	12.6179	1.86694	0				2008-11-09	4.0447	3.3226	-2.92209	0				2008-11-09	10.0868	7.42572	-2.56192	0
2008-11-10	1.19912	5.08646	-2.18072	0.0615792				2008-11-10	9.1026	1.54297	-6.23419	0				2008-11-10	11.088	9.46155	-1.85413	0
2008-11-11	9.7974	4.8464	-3.10785	0				2008-11-11	12.3913	1.78073	-6.22028	0				2008-11-11	11.1362	11.5012	-0.71225	0
2008-11-12	11.04	4.72928	-3.29196	0				2008-11-12	11.4316	8.13757	-3.65625	0				2008-11-12	11.6656	13.6144	-0.15799	0
2008-11-13	9.24395	4.73154	-2.30905	0				2008-11-13	10.1712	0.482696	-7.83618	0				2008-11-13	4.99897	7.38986	-1.37317	0.0311099
2008-11-14	8.27177	3.58676	-2.25107	0				2008-11-14	11.3665	3.61587	-6.68439	0				2008-11-14	8.36692	7.34058	-2.97079	0.0575958
2008-11-15	10.8901	5.12747	-2.13913	0				2008-11-15	10.2914	6.00687	-3.50455	0				2008-11-15	7.44037	2.88525	-4.03079	0.0215618
2008-11-16	9.45646	5.94281	-2.85013	0				2008-11-16	9.49778	8.89221	-1.12967	0				2008-11-16	10.3401	10.5161	-4.44772	0.0103523
2008-11-17	10.0308	6.62857	-3.04956	0				2008-11-17	7.2024	6.49567	-1.89249	0.045787				2008-11-17	10.4353	-1.92029	-10.5724	0
2008-11-18	8.83908	8.95621	-1.35504	0				2008-11-18	7.27011	5.02853	-4.75272	0				2008-11-18	10.028	-3.55203	-12.8068	0
2008-11-19	9.35186	8.5892	-2.31491	0				2008-11-19	10.6787	1.112	-6.11539	0				2008-11-19	10.3991	0.0195007	-8.99582	0
2008-11-20	9.77744	8.05554	-2.95654	0				2008-11-20	10.7731	4.95895	-4.69644	0				2008-11-20	10.4189	4.60996	-5.4415	0
2008-11-21	10.0955	8.24585	-1.82635	0				2008-11-21	10.7291	6.36832	-3.26968	0				2008-11-21	10.3629	3.40158	-6.02969	0
2008-11-22	9.59084	9.53802	-1.74036	0				2008-11-22	10.3965	7.63742	-1.61374	0				2008-11-22	9.60388	4.86777	-5.45468	0
2008-11-23	8.00536	6.81656	-2.60022	0.203715				2008-11-23	9.53513	6.57361	-2.43869	0				2008-11-23	10.01	5.80154	-4.23758	0
2008-11-24	4.20091	-1.39111	-4.02805	0.219288				2008-11-24	9.68352	7.94839	-2.03976	0				2008-11-24	9.89144	6.67755	-3.47201	0
2008-11-25	7.67044	-0.912598	-7.50974	0.00772386				2008-11-25	9.47417	9.66278	0.733765	0				2008-11-25	9.41102	8.53485	-2.05099	0
2008-11-26	9.59135	1.33176	-8.41782	0				2008-11-26	7.65777	8.84164	0.0292053	0				2008-11-26	9.36054	11.1325	-0.891724	0
2008-11-27	9.53647	2.72101	-7.99261	0				2008-11-27	6.39628	5.17776	-2.28986	1.94506				2008-11-27	5.34746	6.77743	-3.84049	0
2008-11-28	9.13638	5.47134	-4.0267	0				2008-11-28	9.30424	5.03513	-3.29553	0				2008-11-28	7.31924	5.55969	-4.05734	0
2008-11-29	8.89338	8.94321	-3.39059	0.0412135				2008-11-29	8.6875	8.02737	-1.90445	0				2008-11-29	9.08952	10.3331	-0.324676	0
2008-11-30	8.03869	1.8396	-3.71979	0.0285466				2008-11-30	9.12187	6.49915	-2.38681	0				2008-11-30	7.43677	14.011	0.162628	0.0269915
2008-12-01	9.25564	5.68643	-3.22131	0				2008-12-01	8.33724	4.08835	-4.40286	0				2008-12-01	7.31752	10.4636	-0.536224	0
2008-12-02	9.10596	8.54196	-2.26584	0				2008-12-02	8.71708	5.83044	-4.75607	0				2008-12-02	6.64283	7.35211	-2.55847	0
2008-12-03	8.65707	7.18289	-2.75052	0				2008-12-03	8.5435	7.77774	-2.4407	0				2008-12-03	4.42393	7.32886	-1.50516	0.291817
2008-12-04	8.77856	8.57639	-2.45261	0				2008-12-04	8.66106	8.96017	-2.69013	0				2008-12-04	4.85887	2.47015	-5.56351	0
2008-12-05	8.70686	7.15314	-3.72861	0				2008-12-05	2.60134	2.64066	-4.33951	0.232544				2008-12-05	6.8878	-1.18237	-7.91367	0
2008-12-06	8.44101	4.39319	-3.97723	0				2008-12-06	4.18865	-2.70316	-9.85782	0.540047				2008-12-06	8.594	-1.69186	-9.24027	0
2008-12-07	8.68623	5.79175	-3.28577	0				2008-12-07	5.77595	1.38678	-9.49161	0.030031				2008-12-07	8.74001	-0.16275	-8.76028	0
2008-12-08	8.22287	5.02011	-3.34381	0				2008-12-08	6.82194	0.227386	-7.15274	0				2008-12-08	8.59385	0.618195	-8.21628	0
2008-12-09	8.77554	5.04532	-3.42392	0				2008-12-09	8.31136	1.36661	-12.5626	0.0115706				2008-12-09	8.53	2.12628	-8.46442	0
2008-12-10	8.88516	2.7294	-5.82925	0				2008-12-10	9.43538	-4.91953	-14.3285	0				2008-12-10	7.67779	0.0640259	-8.79483	0
2008-12-11	8.5199	2.70459	-6.54428	0				2008-12-11	8.53807	-2.80539	-12.7081	0				2008-12-11	7.40768	0.0195312	-9.88901	0
2008-12-12	8.34226	2.1749	-4.85605	0				2008-12-12	7.55886	-7.55319	-19.2027	0.0938225				2008-12-12	8.70901	3.34195	-6.50348	0
2008-12-13	8.28872	0.729248	-6.93765	0				2008-12-13	9.07826	-10.3202	-19.6299	0.00777095				2008-12-13	8.78465	-2.6702	-10.7035	0
2008-12-14	8.7224	-0.0882263	-8.73789	0				2008-12-14	9.14557	-5.8168	-15.7365	0				2008-12-14	8.51488	0.623505	-10.2339	0
2008-12-15	8.10012	1.3642	-7.99585	0				2008-12-15	8.80618	-2.36362	-12.6916	0				2008-12-15	8.27207	4.60336	-5.42218	0
2008-12-16	6.82484	1.43027	-7.62241	0				2008-12-16	1.8376	-3.44833	-11.8991	0				2008-12-16	3.16954	0.249237	-8.70877	0.435015
2008-12-17	5.85442	-1.17709	-8.67258	0				2008-12-17	5.2085	-4.0549	-12.7502	0.00826202				2008-12-17	4.62286	-4.50824	-11.9143	0.0175685
2008-12-18	7.29801	0.227386	-9.53097	0.0368257				2008-12-18	7.57848	-2.57425	-12.8873	0.0367431				2008-12-18	5.73137	-7.73929	-15.4078	0.0741591
2008-12-19	5.8819	0.924316	-5.82864	0.0388299				2008-12-19	6.64322	-0.0218201	-9.8858	0				2008-12-19	5.31769	-9.86215	-18.226	0.0258894
2008-12-20	3.08096	1.41754	-4.04983	0.117352				2008-12-20	6.74687	0.056488	-9.37344	0				2008-12-20	6.46475	-7.08743	-16.7589	0
2008-12-21	0.280025	1.62375	-4.70834	0.11035				2008-12-21	8.24078	-0.606323	-10.053	0				2008-12-21	8.90309	-7.78952	-18.0804	0
2008-12-22	6.67181	-2.15167	-9.66757	0				2008-12-22	8.15305	1.17718	-10.1258	0				2008-12-22	8.51559	-0.123657	-11.6647	0
2008-12-23	8.61089	1.11093	-10.1639	0				2008-12-23	7.96395	5.54141	-7.20071	0				2008-12-23	6.56076	-1.6611	-12.3751	0
2008-12-24	4.43912	0.852387	-6.09964	0				2008-12-24	8.00545	1.76535	-7.70483	0				2008-12-24	5.81288	-1.45908	-10.365	0
2008-12-25	2.12641	-3.56763	-10.5143	0				2008-12-25	8.04695	0.520966	-10.0124	0				2008-12-25	8.54493	1.41119	-9.7486	0
2008-12-26	8.33401	-1.87204	-11.2888	0				2008-12-26	6.76732	-1.81259	-12.2776	0				2008-12-26	8.06766	5.23477	-6.73392	0
2008-12-27	9.13217	0.468262	-11.4346	0				2008-12-27	8.78174	-4.98294	-14.7068	0				2008-12-27	6.02052	7.42837	-3.67862	0
2008-12-28	8.84353	2.58771	-9.10425	0				2008-12-28	8.05234	-3.28824	-15.7776	0				2008-12-28	7.39077	3.70599	-10.808	0
2008-12-29	5.91155	-2.51312	-10.6633	0.0203393				2008-12-29	7.99784	-0.111237	-10.6962	0				2008-12-29	4.15989	-5.55801	-14.2508	0
2008-12-30	5.34887	-5.3468	-12.2027	0.0122347				2008-12-30	9.03571	1.83896	-10.3317	0				2008-12-30	8.83535	-1.81506	-13.3644	0
2008-12-31	7.93107	-0.920929	-11.2598	0				2008-12-31	8.24511	-0.880066	-11.0753	0				2008-12-31	8.57971	3.13052	-8.22681	0
2009-01-01	8.72477	0.305267	-10.6961	0				2009-01-01	8.01498	3.63712	-7.97974	0				2009-01-01	6.51672	3.7695	-5.80676	0
2009-01-02	8.63967	-1.776	-10.6572	0				2009-01-02	3.66696	0.740509	-11.2849	0				2009-01-02	6.07473	-0.113068	-8.43021	0
2009-01-03	8.78117	0.580994	-11.2275	0				2009-01-03	8.99573	3.38809	-9.71551	0				2009-01-03	8.89142	4.21994	-7.15198	0
2009-01-04	7.9161	-0.120392	-8.90625	0				2009-01-04	9.32245	-0.483276	-8.6481	0				2009-01-04	7.78881	4.21085	-6.05914	0
2009-01-05	5.31427	-4.14896	-13.4654	0				2009-01-05	6.18337	0.424622	-9.63525	0				2009-01-05	5.80045	3.94638	-6.65494	0
2009-01-06	8.33874	-0.846527	-14.1733	0				2009-01-06	3.46932	0.126129	-16.046	0.0231167				2009-01-06	8.60939	-2.24554	-10.297	0
2009-01-07	9.01751	1.63437	-11.3394	0				2009-01-07	9.05023	-7.69162	-19.5915	0				2009-01-07	9.21862	2.43924	-10.4755	0
2009-01-08	9.07381	3.58499	-7.69168	0				2009-01-08	7.83859	1.09213	-10.9701	0				2009-01-08	9.39836	4.42966	-7.55112	0
2009-01-09	7.60085	3.12253	-8.1225	0				2009-01-09	8.56049	-0.754761	-10.1578	0				2009-01-09	8.6397	3.69479	-8.03436	0
2009-01-10	5.20646	1.37653	-8.61844	0				2009-01-10	6.97198	-5.02506	-13.4343	0				2009-01-10	8.56195	2.04922	-7.80264	0
2009-01-11	8.89033	-1.5322	-12.0369	0				2009-01-11	6.71552	-0.832947	-13	0				2009-01-11	9.38955	3.819	-6.18713	0
2009-01-12	8.75555	-0.759735	-13.4983	0				2009-01-12	9.32555	1.91733	-10.6018	0				2009-01-12	9.56991	3.10526	-9.06143	0
2009-01-13	2.74695	-1.88086	-11.1016	0				2009-01-13	9.38089	-3.24011	-13.2587	0				2009-01-13	9.45898	0.625885	-10.9599	0
2009-01-14	2.23212	-2.02115	-12.6338	0.224628				2009-01-14	9.27886	-1.86417	-12.18	0				2009-01-14	4.39939	-1.48035	-10.0445	0.443026
2009-01-15	9.46365	0.305695	-13.5883	0				2009-01-15	8.92317	-0.862854	-13.7778	0				2009-01-15	9.08964	3.67645	-7.70868	0
2009-01-16	9.30772	3.2576	-11.5731	0				2009-01-16	8.66115	0.875427	-10.5328	0				2009-01-16	6.06242	1.66061	-9.3475	0
2009-01-17	9.75649	-8.14014	-19.4505	0				2009-01-17	6.94152	-1.07715	-12.1317	0				2009-01-17	6.52708	1.30795	-8.42685	0
2009-01-18	10.5967	-12.057	-21.1591	0				2009-01-18	9.35628	-2.38147	-16.0879	0				2009-01-18	4.64537	0.174957	-7.7128	0.10046
2009-01-19	11.1865	-8.57095	-21.626	0				2009-01-19	8.59605	-7.79858	-19.727	0				2009-01-19	3.82346	-0.243408	-8.75647	1.27257
2009-01-20	8.42284	-6.28412	-20.5472	0				2009-01-20	8.99923	-6.27743	-18.7261	0				2009-01-20	4.03006	-3.89966	-13.022	0.151653
2009-01-21	9.69719	0.109772	-14.1349	0				2009-01-21	11.136	-9.43112	-21.3135	0				2009-01-21	5.74395	-3.78461	-14.9562	0.0231476
2009-01-22	6.92564	3.18359	-11.0713	0				2009-01-22	9.93458	-5.57562	-17.1971	0				2009-01-22	4.56812	-0.697754	-12.3232	0
2009-01-23	5.6743	0.887238	-13.1601	0				2009-01-23	10.4466	-4.21707	-16.5133	0				2009-01-23	9.34201	-0.855102	-11.241	0
2009-01-24	11.071	-10.3506	-17.2023	0				2009-01-24	10.0671	-1.57278	-13.258	0				2009-01-24	6.96521	1.07007	-11.2807	0
2009-01-25	11.0875	-4.27536	-18.8949	0				2009-01-25	10.5339	-3.2662	-14.1717	0				2009-01-25	10.2134	-4.58691	-15.6736	0
2009-01-26	10.3231	-3.71051	-16.0129	0				2009-01-26	11.4449	0.726715	-13.7431	0				2009-01-26	8.405	-4.48361	-16.578	0
2009-01-27	10.8403	-7.043	-17.9085	0				2009-01-27	10.9121	0.719757	-11.3209	0				2009-01-27	10.8554	-3.54962	-15.9141	0
2009-01-28	6.0311	-7.14911	-15.2782	0.123319				2009-01-28	10.8797	2.90964	-11.2812	0				2009-01-28	11.5844	-3.25812	-14.4464	0
2009-01-29	0.775775	-6.58524	-14.7303	0				2009-01-29	9.26801	4.67258	-7.15399	0				2009-01-29	11.7411	-4.19354	-15.6644	0
[truncated: 33,573 more rows]

## Sheet: RCP 6.0
Yongning
MIROC5								IPSL-CM5A-MR								GFDL-ESM2G
[truncated: 34,699 more rows]

## Sheet: RCP 8.5
Yongning
[truncated: 34,700 more rows]
