# Supplementary material for: Effects of temperature frequency trends on projected japonica rice (Oryza sativa L.) yield and dry matter distribution with elevated carbon dioxide
Source: PeerJ. 2021 Mar 11;9:e11027. doi: 10.7717/peerj.11027 (PMC7956007; doi:10.7717/peerj.11027)
Supplement: Supplemental Information 5 [file peerj-09-11027-s005.xlsx]

## Sheet: RCP 2.6
Zhongwei station																							Yongning station
MIROC5							IPSL-CM5A-MR							GFDL-ESM2G									MIROC5							IPSL-CM5A-MR							GFDL-ESM2G
Year	Anthesis day	Maturity day	Yield (kg/ha)				Year	Anthesis day	Maturity day	Yield (kg/ha)				Year	Anthesis day	Maturity day	Yield (kg/ha)						Year	Anthesis day	Maturity day	Yield (kg/ha)				Year	Anthesis day	Maturity day	Yield (kg/ha)				Year	Anthesis day	Maturity day	Yield (kg/ha)
2006	89	146	9448.99				2006	78	135	8298.76				2006	86	138	9250.15						2006	86	142	9026.44				2006	77	131	8103.27				2006	88	146	9086.41
2007	91	165	8292.63				2007	88	136	9517.5				2007	77	121	9015.74						2007	88	152	8269.26				2007	90	147	9169.29				2007	78	124	8937.3
2008	83	136	8491.27				2008	87	140	8628.33				2008	74	111	8086.96						2008	80	129	8782.73				2008	87	143	8540.18				2008	73	110	8146.71
2009	82	131	8305.24				2009	77	121	8840.91				2009	84	154	8103.68						2009	80	129	8181.4				2009	78	122	8830.64				2009	85	171	7816.51
2010	86	141	8689.24				2010	82	130	8407.46				2010	83	131	9159.48						2010	82	138	8356.77				2010	82	133	8274.31				2010	82	131	9024.69
2011	83	129	8963.53				2011	77	119	8463.9				2011	82	131	9297.54						2011	81	127	8895.42				2011	77	120	8331.71				2011	82	130	9356.15
2012	81	129	8415.15				2012	84	132	8967.59				2012	83	147	8529.9						2012	77	123	8452.14				2012	84	131	9326.57				2012	83	149	8437.81
2013	78	121	8339.71				2013	77	122	8827.04				2013	78	129	8285.63						2013	77	119	8758.38				2013	74	116	8306.31				2013	78	130	8519.85
2014	74	115	7708.42				2014	83	135	8569.06				2014	81	131	8514.01						2014	70	109	7530.17				2014	82	133	8553.26				2014	81	130	8853.6
2015	79	134	7712.75				2015	80	124	8183.38				2015	83	130	8429.7						2015	75	124	7389.44				2015	81	126	8421.89				2015	81	131	8282.08
2016	78	125	9132.16				2016	82	127	8682.48				2016	83	139	9210.51						2016	77	122	9025.87				2016	82	131	8897.5				2016	82	139	9275.12
2017	78	120	8655.65				2017	82	128	7832.43				2017	84	138	8600.59						2017	76	118	8550.16				2017	84	128	8325.15				2017	83	135	8440.44
2018	78	122	8574.92				2018	74	112	8681.41				2018	84	140	8601.51						2018	75	120	8384.42				2018	75	111	8739.78				2018	81	135	8602.46
2019	82	130	8682.39				2019	72	121	8245.1				2019	83	137	8250.11						2019	78	122	8474.79				2019	75	128	8481.1				2019	81	138	7917.35
2020	82	130	8862.39				2020	76	121	8083.95				2020	82	131	8967.75						2020	78	124	8735.51				2020	75	118	7651.03				2020	81	130	9166.99
2021	81	126	8464.45				2021	81	124	8823.81				2021	89	151	8774.07						2021	77	123	8654.73				2021	79	123	8489.95				2021	87	169	8111.7
2022	81	130	8321.72				2022	80	125	8682.52				2022	90	147	8782.59						2022	78	125	8266.4				2022	80	131	8485.83				2022	88	141	8772.95
2023	76	118	8760.39				2023	82	124	9019.5				2023	85	131	8381						2023	74	115	8763.2				2023	82	122	8884.99				2023	86	135	8662.03
2024	89	142	8859.38				2024	81	122	9000.78				2024	88	143	9804.75						2024	86	138	9067.03				2024	75	116	8517				2024	85	132	9562.48
2025	75	118	7967.07				2025	73	109	8233.61				2025	85	130	9017.17						2025	73	115	8192.2				2025	72	107	7957.91				2025	84	130	8875.64
2026	77	126	8694.96				2026	74	116	8510.3				2026	79	127	9386.06						2026	73	122	8193.4				2026	76	122	8609.98				2026	78	124	9453.39
2027	79	123	8770.58				2027	83	130	9115.24				2027	84	130	9481.86						2027	76	116	8691.23				2027	84	131	9418.71				2027	81	128	8879.1
2028	77	116	8268.37				2028	80	122	8858.95				2028	77	130	8789.6						2028	75	116	8337.04				2028	81	124	9307.48				2028	81	133	9609.2
2029	73	114	8202.52				2029	79	126	8723.42				2029	85	152	8507.35						2029	70	111	7932.97				2029	78	126	8461.02				2029	83	143	8444.77
2030	73	111	8129.86				2030	75	114	8487.42				2030	93	160	9474.78						2030	71	109	8092.86				2030	76	116	8362.23				2030	93	170	8697.41
2031	77	120	8628.41				2031	82	139	8726.35				2031	86	137	8981.59						2031	75	120	9019.62				2031	83	138	8567.74				2031	86	142	8501.61
2032	81	132	8929.61				2032	76	118	8458.63				2032	82	126	8581.26						2032	77	128	8850.56				2032	76	119	7707.98				2032	80	126	8314.02
2033	71	111	7760.02				2033	78	117	8189.33				2033	89	148	8699.51						2033	69	108	7698.69				2033	76	116	8154.37				2033	90	151	8705.21
2034	77	119	8405.03				2034	84	133	9120.25				2034	78	135	8699.28						2034	76	116	8939.5				2034	85	135	8946.12				2034	80	139	8731.59
2035	78	121	8327.18				2035	77	117	7978.04				2035	86	136	9524.61						2035	74	115	8272.92				2035	78	123	8189.02				2035	86	138	9418.45
2036	82	125	8281.21				2036	92	154	10148.2				2036	88	137	9885.51						2036	79	121	8457.95				2036	95	169	9845.45				2036	90	143	9777.53
2037	75	117	7912.23				2037	80	128	9298.73				2037	75	112	8522.03						2037	73	116	8013.02				2037	80	129	9313.17				2037	84	131	7973.03
2038	74	113	8199.82				2038	82	127	8393.73				2038	84	137	8861.08						2038	72	112	8461.61				2038	81	128	8272.96				2038	82	136	8728.19
2039	74	113	8378.34				2039	77	120	8588.81				2039	88	164	8329.94						2039	71	109	8235.84				2039	76	118	8447.87				2039	89	165	7683.05
2040	76	116	7806.67				2040	86	136	9387.32				2040	81	127	8851.05						2040	75	115	8206.32				2040	85	132	9521.09				2040	79	126	8742.32
2041	73	112	8285.87				2041	79	120	8418.73				2041	85	140	7295.04						2041	72	109	8721.67				2041	77	116	8087.91				2041	77	124	8057.98
2042	75	113	8256.24				2042	85	130	9030.5				2042	75	115	8852.19						2042	73	112	8661.92				2042	87	131	9459.41				2042	74	114	8977.91
2043	72	113	8129.51				2043	74	112	8179.35				2043	84	141	8840.06						2043	71	112	8165.33				2043	75	114	8199.39				2043	82	136	8984.66
2044	74	114	8611.44				2044	82	124	8733.73				2044	78	119	8995.04						2044	72	112	8987.64				2044	82	125	8769.98				2044	81	122	9125.56
2045	70	107	7402.06				2045	76	117	9003.28				2045	88	144	9505.77						2045	69	105	8032.36				2045	76	115	9027				2045	87	134	9546.21
2046	76	114	8117.33				2046	73	108	8155.59				2046	85	132	9147.78						2046	71	110	7883.65				2046	71	106	7922.11				2046	85	129	9197.15
2047	72	113	7634.69				2047	72	112	8442.71				2047	76	126	8387.18						2047	67	106	7829.72				2047	72	113	8603.99				2047	76	126	8628.13
2048	75	114	8061.81				2048	78	116	8527.51				2048	92	142	9331.62						2048	72	112	8478.05				2048	75	113	8314.87				2048	93	148	8922.57
2049	75	116	8482.54				2049	70	107	7637.06				2049	83	144	9161.9						2049	73	115	8905.71				2049	70	106	7403.09				2049	79	130	8935.87
2050	80	125	9696.76				2050	73	109	8004.79				2050	86	146	8650.96						2050	77	124	9721.03				2050	74	110	8067.63				2050	86	145	8731.28
2051	75	115	8445.1				2051	75	118	8262.9				2051	89	133	10280						2051	74	114	8840.5				2051	74	116	7912.27				2051	86	130	9797.03
2052	74	113	8535.78				2052	85	131	9721.57				2052	77	125	8871.97						2052	73	111	8738.76				2052	84	130	9739.35				2052	78	128	8625.72
2053	72	107	8057.02				2053	74	110	7432.23				2053	80	130	8768.2						2053	70	107	8379.68				2053	71	109	7657.44				2053	81	133	8423.21
2054	78	124	8183.38				2054	77	119	8996.15				2054	88	150	8667.96						2054	75	120	8640.69				2054	77	120	8834.02				2054	87	152	8089.82
2055	79	130	8082.93				2055	73	112	8326.25				2055	87	149	9118.4						2055	76	125	8306.17				2055	73	111	8073.73				2055	88	151	8700.23
2056	75	114	8250.79				2056	87	140	8925.71				2056	89	147	8925.58						2056	72	110	7964.43				2056	87	142	9072.44				2056	89	147	8785.02
2057	77	120	8434.41				2057	78	116	7555.13				2057	84	135	8712.31						2057	74	115	8784.67				2057	77	114	7706.09				2057	84	135	8853.56
2058	77	117	8705.9				2058	84	128	9272.1				2058	82	131	9769.71						2058	76	116	8842.46				2058	84	129	9400.3				2058	79	127	9497.41
2059	78	122	8574.41				2059	82	122	8879.09				2059	86	143	9253.52						2059	76	117	9061.82				2059	79	117	8638.2				2059	84	142	8704.48
2060	79	124	8406.15				2060	80	119	8746.39				2060	88	148	9092.82						2060	76	116	8861.5				2060	78	116	8426.75				2060	87	148	9380.27
2061	77	120	8454.31				2061	82	127	9090.52				2061	85	144	8948.83						2061	72	111	8806.58				2061	82	127	9076.43				2061	83	142	8657.51
2062	78	121	8035				2062	75	113	8540.1				2062	88	165	8263.72						2062	76	116	8457.43				2062	75	114	8529.39				2062	87	167	8071.64
2063	73	115	7922.71				2063	78	122	8650.53				2063	93	147	9922.78						2063	71	112	8413.75				2063	76	119	7943.6				2063	91	141	9630.39
2064	73	114	8147.53				2064	77	117	8695.84				2064	86	138	9855.59						2064	72	110	8213.02				2064	76	113	8454.39				2064	86	138	9821.95
2065	71	105	7791.84				2065	77	120	8576.8				2065	88	147	9087.14						2065	67	102	7720.81				2065	74	117	8529.74				2065	87	148	8815.75
2066	75	115	7674.09				2066	78	126	8435.1				2066	74	124	8820.31						2066	73	113	8269.25				2066	76	120	8180.09				2066	72	120	8314.74
2067	78	120	8158.47				2067	78	123	8856.09				2067	88	148	8806.67						2067	76	116	8580.46				2067	77	121	8577.5				2067	88	151	8510.9
2068	74	111	7990.06				2068	81	121	8689.07				2068	88	141	9407.51						2068	72	111	8249.82				2068	79	116	8399.4				2068	86	136	9174.25
2069	74	112	8217.35				2069	80	118	9420.98				2069	78	126	9187.92						2069	73	113	8887.62				2069	79	116	9102.12				2069	80	131	9212.58
2070	73	112	8223.18				2070	70	112	7317.97				2070	89	149	9715.15						2070	70	109	8105.88				2070	67	107	7092.13				2070	89	149	9588.01
2071	75	114	8096.5				2071	74	110	7984.35				2071	84	139	9463.31						2071	73	112	8358.92				2071	73	112	7771.86				2071	83	135	9413.45
2072	69	101	7795.67				2072	76	116	8120.04				2072	90	137	10151.9						2072	67	99	7833.07				2072	76	116	8212.3				2072	89	138	9858.23
2073	76	116	8527.78				2073	71	110	7767.16				2073	87	144	8977.1						2073	74	115	8481.09				2073	71	109	7861.64				2073	90	153	9198.04
2074	73	114	7876.9				2074	76	118	8280.98				2074	79	128	8698.49						2074	68	108	7640.94				2074	77	117	8234.69				2074	78	125	8739.14
2075	72	109	8012.3				2075	75	116	8780.45				2075	90	163	9664						2075	71	108	8222.14				2075	72	111	8132.16				2075	88	160	9206.21
2076	77	116	8494.37				2076	81	126	10113.7				2076	81	126	9206.7						2076	76	115	8916.63				2076	83	130	10350.7				2076	80	126	9296.47
2077	74	113	8071.37				2077	70	106	7020.99				2077	83	132	8834.49						2077	73	112	8342.35				2077	71	107	7375.43				2077	82	129	8806.15
2078	76	120	8510.55				2078	78	117	7982.91				2078	87	146	8936.82						2078	76	123	8722.73				2078	75	113	7990.56				2078	85	140	8801.84
2079	75	122	8350.45				2079	82	134	8637.58				2079	81	121	9326.53						2079	72	120	8810.98				2079	79	130	8392.73				2079	81	121	9210.52
2080	77	120	8163.39				2080	86	136	9070.02				2080	80	125	9466.74						2080	73	115	8156.99				2080	84	133	8758.84				2080	79	122	8906.37
2081	76	115	8297.44				2081	75	113	8273.85				2081	78	115	9319.14						2081	73	112	8564.59				2081	77	115	8648.15				2081	78	117	9579.9
2082	78	120	8212.12				2082	78	124	8493.43				2082	79	126	9297.15						2082	74	114	8434.93				2082	77	122	8557.51				2082	79	123	9493.08
2083	75	117	8704.81				2083	79	126	8425.4				2083	82	140	9567.95						2083	73	114	9076.51				2083	78	122	8236.44				2083	79	133	9086.42
2084	74	113	7891.2				2084	79	116	8430.1				2084	82	132	8651.5						2084	72	109	7928.75				2084	78	115	8262.27				2084	83	134	8604.18
2085	73	109	7661.9				2085	76	113	8595.08				2085	83	130	9176.55						2085	71	107	8011.14				2085	75	112	8601.44				2085	81	124	9099.9
2086	79	119	8705.39				2086	72	111	7645.09				2086	78	133	8387.36						2086	79	119	9279.5				2086	71	110	7535.31				2086	77	134	8062.51
2087	68	107	7797.49				2087	77	119	8721.32				2087	85	144	9363.14						2087	68	107	8167.05				2087	78	118	8720.35				2087	85	153	8884.09
2088	70	110	7280.88				2088	77	115	8700.23				2088	81	133	9129.23						2088	70	111	7666.35				2088	77	115	8962.53				2088	79	131	8872.1
2089	75	118	8156.58				2089	79	122	8408.15				2089	79	132	9154.4						2089	74	118	8835.97				2089	79	120	8340.28				2089	77	131	9091.06
2090	76	118	7913.17				2090	75	119	8068.13				2090	79	132	8554.12						2090	73	114	8067.44				2090	76	119	8141.11				2090	77	126	8561.91
2091	74	114	8505.57				2091	73	111	8892.14				2091	82	130	9902.15						2091	71	111	8223.96				2091	74	111	8624.35				2091	81	128	9976.32
2092	76	118	7621.54				2092	81	121	8618.02				2092	84	136	9286.15						2092	73	116	7675.88				2092	81	120	8196.25				2092	83	130	9242.39
2093	74	117	7589.44				2093	82	129	8563.82				2093	77	115	9139.69						2093	72	113	7744.81				2093	82	130	8561.06				2093	77	117	9083.6
2094	77	118	7881.17				2094	79	118	7702.2				2094	85	135	10252.2						2094	74	115	7834.34				2094	77	114	7727.97				2094	85	135	9905.91
2095	73	111	8155.75				2095	72	116	8477.27				2095	85	134	9721.7						2095	71	110	8350.81				2095	70	112	8061.23				2095	84	129	9635.1
2096	79	121	8320.34				2096	83	123	8304.95				2096	89	149	9605.19						2096	75	118	8133.34				2096	82	122	8570.13				2096	88	154	9331.3
2097	75	117	8007.64				2097	79	122	9677.7				2097	80	134	9570.55						2097	73	115	8203.28				2097	78	120	9318.9				2097	79	131	9229.63
2098	76	128	7568.14				2098	80	117	8857.17				2098	83	133	8915.3						2098	76	127	7808.45				2098	79	116	8588.71				2098	82	129	9099.24
2099	77	122	7966.15				2099	96	162	8395.37				2099	77	115	8640.78						2099	74	119	8435.67				2099	95	162	8094.95				2099	79	117	8914.01
2100	73	121	7912.02				2100	78	116	8205.19				2100	78	126	8330.34						2100	72	118	8014.6				2100	77	115	8055				2100	77	123	8614.72

## Sheet: RCP 4.5
Zhongwei station																							Yongning station
MIROC5							IPSL-CM5A-MR						GFDL-ESM2G										MIROC5							IPSL-CM5A-MR							GFDL-ESM2G
Year	Anthesis day	Maturity day	Yield (kg/ha)				Year	Anthesis day	Maturity day	Yield (kg/ha)			Year	Anthesis day	Maturity day	Yield (kg/ha)							Year	Anthesis day	Maturity day	Yield (kg/ha)				Year	Anthesis day	Maturity day	Yield (kg/ha)				Year	Anthesis day	Maturity day	Yield (kg/ha)
2006	84	134	8867.62				2006	89	151	8554.26			2006	81	125	8902.44							2006	80	127	8719.68				2006	86	144	9014.07				2006	81	123	8933.66
2007	83	133	9433.08				2007	77	120	8433.5			2007	79	123	8812.61							2007	83	133	9469.96				2007	78	121	8312.32				2007	78	122	8651.15
2008	85	147	8393.07				2008	89	137	9718.91			2008	85	134	9669.39							2008	81	142	8043.63				2008	85	134	9098.35				2008	85	134	9338.17
2009	82	132	7925.66				2009	83	126	7938.54			2009	83	140	7969.59							2009	78	125	7853.88				2009	84	131	8229.45				2009	82	139	7885.44
2010	80	144	8587.12				2010	75	116	8437.63			2010	75	112	8385.59							2010	79	135	8804.76				2010	74	114	8281.39				2010	77	116	8224.55
2011	82	135	8208.79				2011	78	123	8702.66			2011	94	179	8609.59							2011	80	132	8066.24				2011	78	125	8527.44				2011	93	170	9039.43
2012	84	138	8504.15				2012	82	126	8364.22			2012	83	143	8372.08							2012	83	137	8287.46				2012	81	127	8018.49				2012	80	139	8223.9
2013	83	135	8466.29				2013	82	136	8713.99			2013	78	132	8672.44							2013	78	124	8145.14				2013	80	131	8755.12				2013	79	138	8639.91
2014	82	130	8780.56				2014	76	117	8689.3			2014	77	127	8246.79							2014	78	127	8711.99				2014	77	118	8168.12				2014	80	133	8675.41
2015	76	119	8226.59				2015	89	140	9037.02			2015	87	153	8106.62							2015	73	112	7914.97				2015	87	138	8666.68				2015	89	161	8097.22
2016	81	134	8321.35				2016	80	131	8194.03			2016	85	144	8723.83							2016	80	132	8544.11				2016	80	129	8307.03				2016	86	145	8801.35
2017	81	127	9250.04				2017	78	122	8858.72			2017	81	119	8511.81							2017	80	126	9700.78				2017	82	140	9028.59				2017	80	117	8398.19
2018	81	129	8692.81				2018	75	116	8126.33			2018	77	124	9296.95							2018	78	123	8961.81				2018	73	115	7443.63				2018	78	126	9003.52
2019	84	136	9035.48				2019	87	163	8271.01			2019	81	135	8339.79							2019	83	136	8996.45				2019	87	161	8467.72				2019	82	138	8352
2020	84	137	9593.7				2020	82	122	8771.14			2020	81	129	9261.18							2020	80	131	9017.47				2020	81	122	8131.45				2020	84	135	8987.61
2021	79	123	8192.44				2021	81	131	8211.96			2021	83	141	8418.93							2021	75	117	7932.1				2021	81	128	8227.6				2021	82	134	8314.66
2022	79	123	8806.97				2022	84	135	8685.05			2022	88	158	7853.19							2022	76	120	8631.02				2022	84	131	8240.84				2022	89	161	8263.39
2023	81	126	8852.95				2023	78	117	8294.69			2023	80	123	8789.57							2023	79	126	8870.56				2023	78	116	8117.1				2023	80	124	8480.3
2024	75	117	8887.49				2024	85	131	9156.18			2024	85	155	8300.33							2024	73	115	8937.26				2024	85	136	8905.96				2024	82	140	8646.17
2025	79	123	8859.82				2025	77	125	7494.19			2025	86	146	8568.4							2025	75	118	8301.93				2025	77	124	7418.41				2025	82	143	8378.8
2026	76	117	8476.91				2026	84	131	9655.83			2026	87	126	9922.83							2026	76	117	8360.9				2026	83	130	9346.23				2026	84	123	9380.18
2027	78	120	8470.02				2027	83	136	8320.05			2027	77	123	9250.92							2027	74	114	8171.34				2027	78	124	8017.48				2027	77	124	8536.01
2028	77	117	8881.65				2028	82	125	9423.79			2028	86	135	9787.95							2028	74	115	8369.47				2028	81	128	8753.96				2028	85	135	9508.56
2029	77	120	8695.43				2029	80	120	8329.07			2029	85	140	9544.2							2029	74	118	8199.98				2029	79	122	8272.4				2029	84	136	9194.81
2030	75	111	8782.71				2030	76	119	8698.4			2030	87	139	8942.52							2030	72	109	8482.1				2030	78	122	8725.1				2030	86	138	8438.18
2031	75	118	8435.25				2031	72	111	7960.84			2031	77	118	8595.52							2031	73	113	8340.84				2031	72	117	7836.83				2031	76	118	8585.17
2032	74	119	8395.07				2032	72	111	7947.33			2032	80	121	9687.77							2032	73	116	8401.99				2032	75	114	8265.77				2032	81	123	9512.29
2033	74	111	8079.17				2033	80	127	8508.82			2033	90	136	10567.2							2033	73	111	7950.34				2033	80	125	8826.21				2033	88	133	9856.92
2034	85	132	8631.2				2034	83	121	8717.56			2034	80	135	8649.32							2034	83	129	8774.78				2034	81	117	8030.69				2034	81	135	8623.33
2035	75	118	9197.76				2035	70	106	8337.48			2035	83	138	8852.23							2035	72	114	8733				2035	70	108	7911.21				2035	82	133	8413.53
2036	76	118	8715.14				2036	76	122	8926.95			2036	78	122	9496.89							2036	74	116	8677.79				2036	74	118	8391.02				2036	78	119	9353.55
2037	77	118	8931.29				2037	71	105	8185.54			2037	83	132	9899.64							2037	76	116	9140.73				2037	71	105	7904.07				2037	84	132	9722.39
2038	72	113	7934.33				2038	74	114	8547.11			2038	78	124	8843.01							2038	69	109	7714.53				2038	75	114	8256.19				2038	77	124	8553.94
2039	74	115	8001.97				2039	74	121	8831.76			2039	77	123	9175.8							2039	73	115	8236.26				2039	74	121	8642.58				2039	76	122	8723.31
2040	69	108	8309.83				2040	79	120	8461.78			2040	85	130	9356.05							2040	68	108	8066.19				2040	81	125	8654.95				2040	86	133	9247.47
2041	73	111	8596.55				2041	76	116	8179.32			2041	81	137	8567.56							2041	72	110	8672.29				2041	76	115	7789.35				2041	80	134	8524.93
2042	81	128	9531.15				2042	71	108	8125.35			2042	81	126	10128							2042	79	125	9358.66				2042	71	109	7810.9				2042	80	124	9699.91
2043	73	111	8330.12				2043	77	118	8108.54			2043	86	139	8825.18							2043	70	107	8028.36				2043	76	119	8243.12				2043	85	140	8458.7
2044	80	123	9156.2				2044	78	115	9324.16			2044	85	134	8824.92							2044	77	121	9043.93				2044	76	112	8678.87				2044	83	130	8558.99
2045	83	126	9872.04				2045	81	125	9721.78			2045	78	117	9146.52							2045	80	121	9779.58				2045	82	125	9668.4				2045	78	118	8432.1
2046	76	120	8956.85				2046	75	114	8960.3			2046	85	138	9053.32							2046	73	118	9096.8				2046	76	116	8932.12				2046	87	151	8521.92
2047	78	118	8365.96				2047	77	111	8522.54			2047	75	120	9491.36							2047	76	117	8369.33				2047	77	114	8415.29				2047	73	118	8769.77
2048	73	110	9415.98				2048	72	109	8291.17			2048	79	116	7303.34							2048	71	108	9203.5				2048	72	110	8065.41				2048	78	115	8541.55
2049	76	120	8213.81				2049	75	115	8944.77			2049	84	135	9429.25							2049	74	118	7814.64				2049	75	113	8718.68				2049	84	137	9252.47
2050	75	116	8162.12				2050	78	114	8505.64			2050	86	144	9433.29							2050	73	114	8233.49				2050	76	115	8091.08				2050	88	153	9271.5
2051	76	120	9225.9				2051	77	117	8466.69			2051	75	124	8606.33							2051	76	123	8838.68				2051	78	117	8542.82				2051	77	126	8704.42
2052	71	108	8198.95				2052	76	112	8758.48			2052	83	126	9763.14							2052	69	106	7993.69				2052	76	111	8740.62				2052	83	126	9641.2
2053	72	109	8304.54				2053	79	118	8856.77			2053	80	127	9556.95							2053	69	106	7842.88				2053	77	116	8282.86				2053	77	123	9142.73
2054	73	111	8541.9				2054	71	109	8715.02			2054	86	136	9132.04							2054	70	106	8065.38				2054	71	109	8567.59				2054	84	135	9243.98
2055	76	118	9223.9				2055	76	115	8488.49			2055	85	137	8445.33							2055	75	117	8881.2				2055	76	115	8437.73				2055	87	143	8870.5
2056	75	111	9111.08				2056	76	115	9094.48			2056	85	131	10234.6							2056	73	109	8905.17				2056	75	116	8551.5				2056	84	126	9525.08
2057	74	113	9386.82				2057	78	115	9270.42			2057	80	122	9577.74							2057	72	112	9114.35				2057	80	120	9381.1				2057	80	126	8945.81
2058	73	107	9226.27				2058	71	108	8963.62			2058	85	144	9176.07							2058	70	104	8649.43				2058	71	111	8486.4				2058	88	157	8824.33
2059	75	116	8966.58				2059	65	100	7890.91			2059	82	122	10644.3							2059	73	113	8492.1				2059	67	102	7860.45				2059	81	122	10308.8
2060	70	110	8214.21				2060	74	110	7712.15			2060	79	124	9639.96							2060	69	107	8345.6				2060	72	107	7073.93				2060	77	121	9600.63
2061	73	108	8946.29				2061	72	108	8424.22			2061	72	120	8951.2							2061	71	106	8882.42				2061	71	108	8366.74				2061	72	119	8772.04
2062	68	104	8158.41				2062	70	102	7569.65			2062	82	128	9918.61							2062	65	101	7645.02				2062	70	102	7534.72				2062	81	126	9692.94
2063	73	108	8708.36				2063	75	112	8177.17			2063	78	120	9866.61							2063	72	108	8207.88				2063	72	110	7771.48				2063	78	121	9661.21
2064	71	106	7637.59				2064	74	112	9267.45			2064	81	130	9374.19							2064	68	103	7874.64				2064	74	112	9084.58				2064	81	136	9560.85
2065	69	106	8072.38				2065	73	109	8831.42			2065	79	127	9495.72							2065	70	107	8104.16				2065	73	109	9004.09				2065	80	127	9093.86
2066	70	108	8725.76				2066	74	113	8277.57			2066	79	119	9507.37							2066	68	104	8362.43				2066	74	112	8348.14				2066	76	119	9184.68
2067	73	111	8720.78				2067	70	106	8631.24			2067	82	135	9237.48							2067	71	110	8504.68				2067	70	107	8143.39				2067	79	129	9084.05
2068	76	115	8116.28				2068	77	115	9357.89			2068	83	123	9723.56							2068	73	111	8357.55				2068	77	116	8642.5				2068	81	120	9413.75
2069	77	116	9520.23				2069	70	105	7827.09			2069	83	133	10179.1							2069	76	115	9325.55				2069	69	103	7854.29				2069	80	126	9507.61
2070	69	106	8490.26				2070	72	106	8732.87			2070	80	129	9927.32							2070	69	107	8377.54				2070	74	108	8727.58				2070	79	127	9500.34
2071	69	106	8145.51				2071	72	106	8087.85			2071	84	138	9237.44							2071	68	103	7543.38				2071	73	107	8208.75				2071	84	137	9254.23
2072	70	105	8099.81				2072	75	109	8746.98			2072	85	132	10534.3							2072	69	105	8081.14				2072	75	109	8758.93				2072	84	131	10291.4
2073	74	110	8232.81				2073	73	106	8039.12			2073	74	115	9190.37							2073	72	108	8033.7				2073	71	104	8096.46				2073	73	113	8928.83
2074	72	106	8191.7				2074	69	104	7563.48			2074	83	129	9287.22							2074	70	104	8377.28				2074	70	106	7266.73				2074	85	132	9269.15
2075	73	109	8827.28				2075	70	103	7964.81			2075	86	135	9878.9							2075	73	110	8881.46				2075	72	105	8478.36				2075	89	149	10046
2076	72	106	8441.43				2076	73	110	9394.73			2076	78	122	9191.58							2076	70	106	8564.51				2076	73	110	9044.4				2076	79	125	8808.15
2077	66	103	8085.16				2077	78	113	8500.82			2077	74	125	9754.97							2077	67	105	8070.48				2077	79	115	8306.48				2077	75	125	9702.87
2078	68	105	8931.58				2078	70	105	8814.13			2078	80	128	9503.23							2078	68	106	8472.9				2078	70	106	8435.47				2078	78	126	8815.26
2079	71	106	8482.67				2079	70	106	8445.58			2079	78	129	9220.33							2079	71	106	8862.31				2079	69	106	7976.61				2079	77	133	8746.66
2080	75	111	9205				2080	74	108	9785.87			2080	77	118	9595							2080	74	110	9101.67				2080	72	105	9073.56				2080	75	116	9077.59
2081	70	107	8814.13				2081	74	109	9070.75			2081	81	129	9713.19							2081	68	105	8528.77				2081	75	111	8717.46				2081	81	129	9231.18
2082	66	104	7974.17				2082	76	110	9166.67			2082	78	121	10078.7							2082	64	100	7904.82				2082	75	109	8861.29				2082	75	116	9616.75
2083	70	107	7987.81				2083	69	104	8258.99			2083	70	109	8433.24							2083	67	105	8015.42				2083	68	104	7685.43				2083	70	109	8528.88
2084	74	112	8911.59				2084	72	107	8536.97			2084	86	138	9202.99							2084	70	106	8595.69				2084	71	107	8362.04				2084	86	140	9143.32
2085	70	104	8272.2				2085	74	108	9390.4			2085	74	117	9291.03							2085	66	100	7720.28				2085	75	111	9096.01				2085	75	116	9117.77
2086	69	107	8390.18				2086	69	107	8689.04			2086	84	135	8875.64							2086	67	106	8389.31				2086	68	105	8312.66				2086	82	140	8561.64
2087	74	112	9348.04				2087	72	105	8724.65			2087	71	109	7715.3							2087	72	110	9192.72				2087	72	105	8361.56				2087	71	110	6814.29
2088	71	111	8621.52				2088	67	97	5814.47			2088	78	127	9508.23							2088	69	108	8426.16				2088	66	99	7278.69				2088	79	130	9059.36
2089	70	108	8191.21				2089	72	105	8823.04			2089	80	123	10409.5							2089	68	107	7996.26				2089	73	107	8782.32				2089	78	119	9672.83
2090	72	113	9710.33				2090	70	105	7238.08			2090	75	119	9326.77							2090	71	110	9549.95				2090	72	110	8299.91				2090	76	119	9179.71
2091	70	105	8106.47				2091	71	104	8236.4			2091	85	127	10503.5							2091	69	105	8370.03				2091	72	106	8162.14				2091	83	127	9880.42
2092	73	110	8457.49				2092	71	104	8484.44			2092	80	120	10164.1							2092	71	108	8208.24				2092	71	105	7819.31				2092	77	117	9637.84
2093	70	110	8458.55				2093	71	106	8239.81			2093	83	128	10134							2093	68	107	8150.93				2093	70	105	8336.84				2093	84	128	10012.9
2094	76	112	9806				2094	75	115	8381.75			2094	82	134	10120							2094	74	111	9488.94				2094	75	116	8422.94				2094	78	127	9613.7
2095	69	104	8866.31				2095	78	112	9313.37			2095	74	121	9056.63							2095	68	103	8730.69				2095	77	110	9114.4				2095	72	117	8727.7
2096	74	111	9027.04				2096	76	113	8649.66			2096	84	130	10109.1							2096	71	107	8917.77				2096	73	109	8279.61				2096	84	131	9753.8
2097	72	111	9280.14				2097	73	107	8666.12			2097	84	128	10199.1							2097	69	109	9356.44				2097	73	107	8136.74				2097	88	134	10555.4
2098	71	108	8638.38				2098	71	104	8115.36			2098	80	123	8817.22							2098	69	104	8482.72				2098	70	104	7448.58				2098	81	128	8815.56
2099	72	111	8590.3				2099	74	110	8469.53			2099	81	127	10597.9							2099	70	108	8641.07				2099	74	111	8047.79				2099	77	122	9655.31
2100	70	105	8595.55				2100	69	108	8559.28			2100	76	123	9742.76							2100	68	103	8416.43				2100	68	105	8478.54				2100	76	121	9622.23

## Sheet: RCP 6.0
Zhongwei station																							Yongning station
MIROC5							IPSL-CM5A-MR							GFDL-ESM2G									MIROC5							IPSL-CM5A-MR							GFDL-ESM2G
Year	Anthesis day	Maturity day	Yield (kg/ha)				Year	Anthesis day	Maturity day	Yield (kg/ha)				Year	Anthesis day	Maturity day	Yield (kg/ha)						Year	Anthesis day	Maturity day	Yield (kg/ha)				Year	Anthesis day	Maturity day	Yield (kg/ha)				Year	Anthesis day	Maturity day	Yield (kg/ha)
2006	80	129	8771.87				2006	82	133	8495.19				2006	77	121	8868.56						2006	76	124	8563.93				2006	81	130	8666.07				2006	78	121	8785.84
2007	83	135	8572.69				2007	82	138	8353.1				2007	85	153	8434.24						2007	79	129	8215.37				2007	81	142	8179.44				2007	85	163	8283.82
2008	88	145	9165.44				2008	91	164	8834.64				2008	82	132	9186.37						2008	86	144	8810.19				2008	90	158	9010.06				2008	83	136	9082.77
2009	79	126	8953.64				2009	82	128	8110.51				2009	87	146	8815.56						2009	76	122	8761.15				2009	83	129	8254.59				2009	86	145	8734.94
2010	90	162	7913.85				2010	86	137	9455.8				2010	84	136	8876.99						2010	90	162	7469.93				2010	86	136	9205.38				2010	82	134	8573.64
2011	77	126	9199.54				2011	75	119	8097.57				2011	83	141	8592.87						2011	74	119	9017.34				2011	75	118	8209.67				2011	80	135	8285.44
2012	84	131	8869.69				2012	83	128	7981.32				2012	80	129	8830.8						2012	82	126	8718.78				2012	79	122	7588.84				2012	80	127	8875.76
2013	80	128	8864.46				2013	83	139	8349.48				2013	85	136	9072.57						2013	76	117	9115.84				2013	82	134	8264.42				2013	82	132	9153.27
2014	81	130	8459.16				2014	81	130	8531.34				2014	83	137	9157.12						2014	78	123	8127.89				2014	80	128	8574.44				2014	84	142	9270.93
2015	83	149	8884.37				2015	76	128	7842.98				2015	73	113	8935.27						2015	83	150	8836.68				2015	73	122	7459.87				2015	76	116	8803.43
2016	88	156	8746.73				2016	83	130	8509.53				2016	81	133	9306.37						2016	87	155	8663.87				2016	83	132	8278.58				2016	80	132	9249.77
2017	79	121	9027.58				2017	88	153	9191.18				2017	82	130	8709.9						2017	76	117	8663.83				2017	86	147	8955.06				2017	82	134	8645.88
2018	84	139	8748.08				2018	78	122	7869.24				2018	84	130	9529.15						2018	81	135	8579.02				2018	77	125	7809.32				2018	83	130	9285.17
2019	82	128	8316.04				2019	86	138	9567.37				2019	89	168	7313.07						2019	80	127	8057.12				2019	85	136	9141.57				2019	94	171	6728.01
2020	80	133	8654.81				2020	83	132	8942.74				2020	83	142	8840.27						2020	78	131	8429.7				2020	81	129	8163.76				2020	81	140	8707.05
2021	78	123	7850.35				2021	85	129	9118.06				2021	82	130	9123.82						2021	76	120	7956.64				2021	88	138	9212.11				2021	80	124	9135.1
2022	80	127	8775.41				2022	76	116	8144.32				2022	76	120	8707.31						2022	75	121	8088.18				2022	77	119	8052.66				2022	76	119	8837.54
2023	74	117	7606.18				2023	79	122	8689.67				2023	78	131	7919.12						2023	72	114	7730.12				2023	80	125	9086.27				2023	78	130	7826.95
2024	79	126	8503.66				2024	81	125	8831.64				2024	82	125	9490.67						2024	77	124	8416.87				2024	81	125	8625.93				2024	80	121	9279.98
2025	78	124	8728.12				2025	80	127	8975.83				2025	76	122	8385.15						2025	73	119	8253.74				2025	79	119	8399.97				2025	78	125	8475.55
2026	83	131	9003.95				2026	79	121	8670.91				2026	74	120	8131.39						2026	81	128	8601.06				2026	78	118	8509.91				2026	73	118	8207.21
2027	84	133	8009.92				2027	79	121	8513.65				2027	79	127	9270.32						2027	79	124	7922.29				2027	76	117	8508.68				2027	80	133	9130.44
2028	75	116	8307.05				2028	79	122	8199.33				2028	91	153	9022.65						2028	73	113	8319.07				2028	80	123	8352.62				2028	90	153	8721.96
2029	85	134	8649.39				2029	84	137	8737.42				2029	88	138	9750.28						2029	83	131	8773.62				2029	84	137	8713.65				2029	87	135	9452.24
2030	82	143	8818.04				2030	80	126	8904.22				2030	77	120	8402.57						2030	81	137	9148.97				2030	79	123	8672.53				2030	76	121	8550.41
2031	86	142	8613.6				2031	86	135	8974.77				2031	89	154	8733.98						2031	85	139	8734.25				2031	84	135	8648.69				2031	88	155	8484.42
2032	76	118	8199.05				2032	72	113	7839.77				2032	85	143	8618.3						2032	74	116	8092.65				2032	72	113	7735.04				2032	87	147	8773.48
2033	78	117	8812.6				2033	87	131	9067.45				2033	87	141	9272.76						2033	75	113	8648.55				2033	88	135	8988.75				2033	86	140	9196.97
2034	78	127	8197.07				2034	75	112	8561.62				2034	84	144	8694.24						2034	77	125	8096.23				2034	77	114	8849.54				2034	81	140	8651.09
2035	77	124	8825.99				2035	78	119	8839.85				2035	81	129	8778.26						2035	76	124	8517.56				2035	78	119	8793.33				2035	83	132	8741.42
2036	77	121	8268.46				2036	75	118	8724.7				2036	86	128	9813.55						2036	74	119	8276.29				2036	76	121	8859.72				2036	84	125	9382.09
2037	77	123	6846.98				2037	79	119	7950.49				2037	77	120	9423.75						2037	75	118	8214.99				2037	79	121	8063.81				2037	77	119	9299.31
2038	81	124	9016.67				2038	80	122	9340.25				2038	82	138	8712.57						2038	78	123	8929.53				2038	80	123	9002.05				2038	80	130	8644.51
2039	71	112	7982.91				2039	80	122	8652.91				2039	78	124	8497.19						2039	69	108	8009.97				2039	78	120	8447.56				2039	75	123	8122.41
2040	79	127	8660.75				2040	81	130	8884.32				2040	91	158	8990.79						2040	76	119	8441.51				2040	81	127	8828.89				2040	93	160	8346.44
2041	74	113	8363.99				2041	77	114	8285.15				2041	78	124	9278.49						2041	71	112	8230.02				2041	76	114	8211.38				2041	77	124	8754.15
2042	77	120	8860.44				2042	78	112	8200.03				2042	81	134	8607.14						2042	74	118	8345.54				2042	74	108	8011.98				2042	79	129	8867.32
2043	73	114	8412.34				2043	75	114	8645.17				2043	85	139	9223.37						2043	69	111	8031.81				2043	72	110	8028.85				2043	83	137	8810.15
2044	76	117	8519.46				2044	74	115	9484.27				2044	81	129	8862.14						2044	73	112	8422				2044	73	112	9099.27				2044	78	123	8526.68
2045	78	117	8259.73				2045	72	109	8374.99				2045	84	135	8855.57						2045	77	115	8418.42				2045	74	113	8385.73				2045	84	135	8869.58
2046	77	125	8756.03				2046	79	121	9268.68				2046	82	126	8253.72						2046	75	120	8302.37				2046	81	123	9077.14				2046	79	125	8238.15
2047	78	122	9147.1				2047	74	112	8070.9				2047	82	131	9245.6						2047	76	119	8911.13				2047	72	112	8024.33				2047	79	125	8677.98
2048	77	116	8828.37				2048	76	117	8140.95				2048	79	131	9022.04						2048	73	112	8314.2				2048	75	117	8097.05				2048	82	133	9356.5
2049	76	117	8411.29				2049	75	113	8261.98				2049	80	126	9514.34						2049	75	115	8658.18				2049	73	111	7918.11				2049	78	127	9182.58
2050	72	112	8461.75				2050	82	124	9673.27				2050	83	133	9414.13						2050	71	113	8564.38				2050	80	121	8895.04				2050	81	129	9325.12
2051	71	109	8347.83				2051	78	119	8704.51				2051	80	129	8648.95						2051	70	108	7893.26				2051	77	118	9078.5				2051	82	137	8687.65
2052	75	118	8549.6				2052	75	113	8309.43				2052	85	135	9616.23						2052	74	118	8082.27				2052	74	113	7934.07				2052	84	133	9397.5
2053	80	124	9330.63				2053	76	117	9124.14				2053	84	140	9317.04						2053	76	120	8624.41				2053	76	118	8819.38				2053	85	141	9176.2
2054	74	117	8852.83				2054	81	128	10249.9				2054	70	107	8429.66						2054	72	116	8645.4				2054	79	125	9748.96				2054	71	108	8381.87
2055	77	120	8746.24				2055	74	116	9077.19				2055	80	126	9251.23						2055	75	119	8245.98				2055	73	114	8847.82				2055	79	125	9168.33
2056	69	110	8295.49				2056	83	124	9720.7				2056	79	120	9272.47						2056	66	108	7867.71				2056	81	120	9347.19				2056	79	119	9213.36
2057	78	117	9016.49				2057	76	117	9286.23				2057	72	115	8957.08						2057	74	112	8509.25				2057	74	115	9185.35				2057	76	124	9132.12
2058	76	116	8764.54				2058	74	112	9185.25				2058	77	124	8594.54						2058	74	114	8583.84				2058	74	112	9049.8				2058	76	126	8421.72
2059	76	115	9032.54				2059	77	112	9092.69				2059	82	128	10173.7						2059	75	114	9003.39				2059	78	113	9293.69				2059	81	125	9657.22
2060	80	125	8894.69				2060	72	112	8546.64				2060	78	119	9337.01						2060	79	123	8867.3				2060	74	116	8551.91				2060	77	119	9131.02
2061	79	120	10044.3				2061	75	119	9230.75				2061	82	128	10065.4						2061	74	117	9521.26				2061	77	122	9316.45				2061	81	126	9917.83
2062	75	117	9005.76				2062	73	110	8757.68				2062	82	132	9259.15						2062	74	114	9002.43				2062	72	111	8475.86				2062	82	134	9104.78
2063	66	101	7257.42				2063	72	113	7475.35				2063	86	138	9305.86						2063	66	103	7813.03				2063	72	114	7810.81				2063	87	138	9622.99
2064	71	111	8112.35				2064	83	127	10736.4				2064	83	139	10029						2064	71	112	8222.13				2064	86	133	10966.7				2064	81	136	9558.2
2065	69	103	8260.69				2065	77	117	9050.07				2065	82	129	10140						2065	68	102	8043.18				2065	78	120	9046.79				2065	82	128	10059.9
2066	75	113	9243.16				2066	73	111	9428.61				2066	78	119	9823.87						2066	75	113	9466.36				2066	74	114	9027.72				2066	76	115	9387.05
2067	72	111	8739.34				2067	76	115	9776.08				2067	82	129	9689.16						2067	69	110	7977.02				2067	78	116	9764.92				2067	80	130	9315.55
2068	69	105	8456.74				2068	74	109	8424.87				2068	76	118	9628.48						2068	68	106	8203.03				2068	74	110	8502.16				2068	76	119	9194.21
2069	75	114	9265.43				2069	73	111	9257.16				2069	79	122	9365.5						2069	73	113	9287.36				2069	74	112	9450.95				2069	78	122	9213.85
2070	72	108	8869.14				2070	68	102	8429.14				2070	78	126	9542.54						2070	71	108	9079.54				2070	72	105	8576.39				2070	78	130	9368.23
2071	71	107	8633.88				2071	74	112	8659.82				2071	77	118	9468.47						2071	70	107	8222.17				2071	76	115	8859.88				2071	76	119	9363.05
2072	71	108	8680.27				2072	71	105	8789.46				2072	76	117	9698.81						2072	69	104	8677.33				2072	71	107	8953.67				2072	73	112	9538.76
2073	72	109	8863.92				2073	80	115	9763				2073	85	134	8610.62						2073	70	108	8624.49				2073	79	113	9414.19				2073	85	136	8449.9
2074	68	101	8386.83				2074	71	103	8574.22				2074	77	119	9512.8						2074	65	97	7770.02				2074	72	104	8513.79				2074	75	118	9205.14
2075	79	118	9170.69				2075	73	106	8245.73				2075	78	127	10317.1						2075	77	116	8959.63				2075	73	106	8205.98				2075	77	124	10249.3
2076	72	110	8553.89				2076	70	105	8122.91				2076	74	118	9414.94						2076	69	108	8386.26				2076	70	105	8003.05				2076	74	114	9394.31
2077	70	106	8908.86				2077	71	107	8963.34				2077	79	126	9531.05						2077	70	107	9159.85				2077	73	107	8868.17				2077	77	119	8835.48
2078	67	99	8484.32				2078	77	111	9088.8				2078	81	123	10005.3						2078	67	98	8387.12				2078	76	111	9169.08				2078	79	123	9644
2079	66	97	8168.21				2079	73	108	8640.78				2079	72	110	9196.6						2079	63	95	8235.9				2079	74	109	8531.43				2079	73	111	9445.78
2080	71	105	8494.5				2080	71	106	8859.04				2080	83	129	10448.1						2080	69	104	8873.3				2080	72	107	8828.94				2080	82	129	10208
2081	70	107	8681.02				2081	71	105	8440.1				2081	76	116	10909.6						2081	69	106	8518.82				2081	70	104	8286.94				2081	75	116	10729.3
2082	68	102	8399.1				2082	72	106	8684.21				2082	73	113	9578.7						2082	67	101	8046.48				2082	71	108	8343.82				2082	73	113	9464.06
2083	68	102	8955.17				2083	66	99	8121.01				2083	80	128	10013.4						2083	67	101	8842.6				2083	68	100	8201.39				2083	82	139	9477.78
2084	70	103	8697.07				2084	65	99	6211.21				2084	75	119	9671.22						2084	69	103	8771.67				2084	67	100	6697.17				2084	74	117	9349.56
2085	67	100	8118.03				2085	73	110	8950.46				2085	85	134	9532.25						2085	67	100	8183.73				2085	73	110	8515.1				2085	83	126	9431.38
2086	70	104	8505.54				2086	69	102	8604.08				2086	81	125	10371.4						2086	68	103	8246.73				2086	70	103	8988.83				2086	79	122	10005.7
2087	68	100	8149.19				2087	68	102	7485.04				2087	81	121	10569.7						2087	67	99	8528.99				2087	69	103	7421.86				2087	80	120	10307.3
2088	66	99	8318.55				2088	69	101	9299.84				2088	83	122	10172.6						2088	64	97	8494.48				2088	71	104	9412.02				2088	81	119	10024.6
2089	74	108	8222.27				2089	69	102	8507.86				2089	75	111	9163.05						2089	71	107	8628.16				2089	68	100	8358.15				2089	73	109	9025
2090	67	99	9425.3				2090	70	105	8217.47				2090	73	108	8809.4						2090	66	99	9498.54				2090	71	106	8583.09				2090	74	110	8884.75
2091	71	108	9418.61				2091	59	93	7148.82				2091	77	114	6689.79						2091	69	106	9166.56				2091	60	93	7334.44				2091	76	112	6977.17
2092	68	101	9094.93				2092	70	104	8850.45				2092	73	112	7102.48						2092	65	100	8873.6				2092	69	105	8430.81				2092	73	112	7955.63
2093	67	102	8325.71				2093	69	102	8474.51				2093	74	109	9524.8						2093	66	101	8431.16				2093	69	99	8397.72				2093	73	109	9597.57
2094	67	101	8939.55				2094	66	100	8938.82				2094	82	134	9947.48						2094	67	101	9218.67				2094	69	104	9339.51				2094	83	134	10195.7
2095	68	102	8726.68				2095	70	103	8223.36				2095	75	117	10429.3						2095	67	100	8444.35				2095	68	101	7819.76				2095	74	116	10025
2096	74	113	10206.9				2096	70	104	9220.39				2096	80	123	10192.5						2096	74	114	9930.12				2096	70	104	9281.98				2096	80	122	9749.01
2097	68	103	8634.09				2097	70	104	9843.53				2097	79	124	9117.87						2097	68	104	9069.9				2097	71	105	9871.7				2097	78	124	8961.53
2098	67	99	8901.66				2098	70	103	8782.19				2098	82	120	10428.3						2098	65	98	8908.49				2098	69	102	9033.77				2098	82	119	10457.7
2099	66	98	8457.59				2099	67	101	8561.71				2099	72	111	8948.14						2099	63	96	7917.57				2099	69	102	8806.74				2099	72	109	8901.62
2100	70	106	9323.99				2100	70	104	8676.82				2100	75	115	10355.3						2100	69	104	9620.2				2100	70	107	8696.61				2100	76	115	10316.9

## Sheet: RCP 8.5
Zhongwei station																							Yongning station
MIROC5							IPSL-CM5A-MR						GFDL-ESM2G										MIROC5							IPSL-CM5A-MR							GFDL-ESM2G
Year	Anthesis day	Maturity day	Yield (kg/ha)				Year	Anthesis day	Maturity day	Yield (kg/ha)			Year	Anthesis day	Maturity day	Yield (kg/ha)							Year	Anthesis day	Maturity day	Yield (kg/ha)				Year	Anthesis day	Maturity day	Yield (kg/ha)				Year	Anthesis day	Maturity day	Yield (kg/ha)
2006	86	150	8449.22				2006	87	141	8686.48			2006	93	161	8313.77							2006	84	144	8480.85				2006	86	140	8641.02				2006	94	160	8373.59
2007	80	125	9509.76				2007	83	126	9014.66			2007	84	137	8665.74							2007	80	125	9173.3				2007	83	128	8740.56				2007	85	141	8863.07
2008	80	133	8451.57				2008	84	131	8788.82			2008	85	141	8583.23							2008	75	130	8372.15				2008	84	133	8084.78				2008	86	151	8337.24
2009	81	127	7972.17				2009	89	143	9211.97			2009	83	140	8682.57							2009	78	121	7667.79				2009	87	141	9019.94				2009	85	150	8465.74
2010	87	143	8903.22				2010	76	120	8759.38			2010	82	133	8565.63							2010	82	134	8333.88				2010	77	124	8321.66				2010	81	132	8199
2011	80	132	7964.96				2011	94	165	9220.73			2011	78	115	8700.72							2011	76	123	7675.7				2011	91	144	9329.56				2011	79	118	8628.71
2012	79	123	8820.48				2012	91	151	8836.13			2012	72	118	8122.64							2012	76	120	8494.74				2012	91	168	8624.4				2012	75	122	8044.67
2013	78	127	8692.04				2013	78	120	8510.97			2013	79	125	8575.4							2013	73	120	8502.9				2013	77	120	8417.91				2013	78	126	8368.33
2014	80	128	8321.57				2014	83	130	8591.76			2014	77	120	8813.97							2014	77	125	7868.69				2014	81	127	8531.86				2014	77	118	8417.99
2015	78	128	8359.07				2015	77	119	7830.26			2015	81	138	8527.42							2015	75	126	7959.1				2015	76	120	7776.84				2015	80	136	8521.65
2016	81	125	8990.94				2016	78	125	8447.85			2016	79	127	8075.76							2016	79	122	8979.71				2016	77	121	8290.25				2016	79	130	8199.61
2017	79	130	8859.03				2017	79	121	9154.07			2017	80	130	9377.81							2017	78	127	9010.26				2017	77	119	8344.24				2017	81	134	9049.05
2018	80	131	8843.17				2018	79	125	9003.32			2018	85	145	8683.11							2018	75	120	8591.15				2018	81	127	9198.77				2018	84	138	8646.74
2019	78	127	8578.94				2019	80	123	7866.02			2019	84	139	8905.89							2019	74	119	8285.21				2019	77	119	7733.41				2019	83	135	9032.32
2020	81	120	9110.56				2020	78	116	8271.95			2020	79	121	8972.22							2020	79	119	9152.8				2020	78	116	8055.08				2020	78	117	9159.98
2021	79	127	8596.34				2021	76	115	8219.56			2021	85	138	8847.5							2021	76	123	8379.62				2021	77	115	7871.62				2021	86	144	8530.92
2022	76	119	8039.05				2022	80	128	8993.77			2022	87	146	9871.58							2022	74	116	7918.35				2022	80	130	8910.6				2022	85	143	9264.44
2023	72	113	8346.35				2023	78	120	8914.74			2023	86	145	9365.05							2023	71	115	8252.49				2023	74	115	7854.69				2023	85	146	8993.37
2024	79	122	8898.78				2024	82	125	9650.57			2024	93	157	9221.58							2024	77	118	8742.32				2024	81	125	9307.9				2024	91	152	8669.92
2025	79	120	8005.02				2025	76	114	8989.89			2025	88	139	9060.65							2025	76	117	8029.12				2025	76	116	8909.87				2025	86	136	8844.49
2026	72	112	7799.73				2026	76	113	8031.8			2026	82	134	8950.19							2026	70	110	7876.23				2026	74	110	7907.87				2026	81	134	8514.59
2027	76	119	8697.19				2027	77	126	8970.68			2027	83	145	8584.27							2027	75	119	8302.09				2027	77	127	8280.84				2027	79	132	8702.26
2028	76	117	8711.86				2028	77	119	8871.54			2028	80	129	9376.03							2028	73	113	8515.37				2028	76	117	8582.4				2028	78	127	8696.33
2029	74	117	8176.23				2029	77	117	9049.62			2029	88	142	9074.76							2029	74	115	8538.35				2029	76	115	8411.58				2029	85	130	9234.48
2030	77	121	8894.61				2030	82	128	9336.4			2030	81	127	8975.18							2030	74	116	8517.64				2030	81	128	8704.1				2030	79	121	8710.05
2031	80	127	8289.33				2031	79	129	8396.84			2031	80	126	9633.44							2031	79	126	8561.84				2031	78	125	8360.06				2031	78	123	9052.87
2032	77	115	9095.67				2032	78	119	8356.76			2032	78	126	9226.6							2032	75	113	8746.14				2032	76	114	7738.01				2032	80	129	9245.75
2033	77	118	8634.13				2033	81	121	9171.39			2033	84	135	8679.82							2033	76	116	8727				2033	80	118	8810.08				2033	84	137	8517.33
2034	80	121	8780.97				2034	79	124	8367.88			2034	85	130	10112.9							2034	77	116	8692.31				2034	78	124	8376.43				2034	82	124	9400.44
2035	71	111	7843.42				2035	71	110	8235.59			2035	83	134	9404.5							2035	70	109	7718.15				2035	68	109	7409.47				2035	82	129	9087.74
2036	82	125	9357.71				2036	74	121	8895.1			2036	77	120	9641.21							2036	82	126	9439.88				2036	75	121	9070.75				2036	73	116	8842.01
2037	83	126	9119.58				2037	77	121	9018.61			2037	78	123	9672.09							2037	80	124	8796.12				2037	77	120	8676.04				2037	77	121	9183.18
2038	78	117	9123.16				2038	77	111	8433.79			2038	85	141	9721.25							2038	76	116	8937.02				2038	77	112	8578.14				2038	85	141	9663.74
2039	73	115	7343.95				2039	70	108	8267.87			2039	79	128	9089.24							2039	70	110	7132.78				2039	70	107	7945.5				2039	79	132	8890.99
2040	71	110	8393.7				2040	73	108	8597.37			2040	85	130	10362							2040	68	106	8003.22				2040	72	107	8310.2				2040	83	128	9743.59
2041	73	115	8782.1				2041	77	115	8405.12			2041	89	135	9853.54							2041	72	115	8946.52				2041	75	113	8292.6				2041	88	136	9836.11
2042	70	106	8618.78				2042	76	115	8705.16			2042	84	138	10203.3							2042	68	103	8826.58				2042	78	119	8754.7				2042	84	138	10271.9
2043	71	109	8371.89				2043	75	110	8894.62			2043	80	122	10311							2043	69	105	8351.45				2043	77	113	9093.05				2043	81	123	9732.01
2044	69	102	8206.79				2044	70	110	8172.61			2044	78	124	9085.7							2044	68	100	7715.73				2044	71	111	8023.58				2044	76	120	8828.72
2045	69	105	8170.53				2045	76	112	9860.43			2045	74	115	9467.35							2045	68	104	8419.87				2045	79	119	10290.7				2045	73	114	8743.01
2046	73	110	8514.03				2046	71	106	7884.78			2046	76	121	8819.62							2046	71	106	8263.7				2046	70	107	7512.85				2046	70	111	8570.79
2047	70	105	9275.17				2047	68	104	8237.8			2047	76	117	9482.82							2047	69	105	9157.95				2047	68	106	7421.24				2047	79	122	9366.08
2048	74	110	8928.18				2048	68	106	8048.59			2048	80	121	9425.65							2048	71	109	8258.05				2048	68	107	8257.86				2048	80	125	9295.76
2049	76	112	8603.99				2049	70	107	8215.32			2049	76	118	9694.01							2049	74	112	8851.71				2049	70	106	8240.75				2049	77	121	9268.4
2050	71	107	9119.07				2050	71	110	8609.56			2050	74	119	9172.62							2050	69	106	8679.31				2050	71	109	8021.15				2050	75	123	8947.95
2051	73	108	8851.87				2051	72	105	8499.12			2051	77	118	10401.4							2051	72	109	8991.16				2051	71	105	8344.96				2051	76	116	10031.7
2052	69	108	8873.61				2052	74	115	9270.14			2052	78	116	9863.25							2052	68	106	8775.38				2052	78	120	9133				2052	78	119	9721.27
2053	72	108	8509.09				2053	75	109	8817.88			2053	71	114	10046.5							2053	70	106	8519.07				2053	76	109	8335.84				2053	70	115	9293.56
2054	69	103	8486.19				2054	69	104	8242.9			2054	74	116	9502.54							2054	67	103	8558.44				2054	70	104	8272.05				2054	75	119	9482.74
2055	66	100	8422.56				2055	70	103	8820.25			2055	74	116	9330.56							2055	65	101	8370.08				2055	69	103	8341.81				2055	73	117	8960.9
2056	70	104	8510.56				2056	71	105	6154.65			2056	74	111	9857.77							2056	68	102	8426.32				2056	70	104	6472.83				2056	72	108	9419.38
2057	68	103	8664.09				2057	69	101	6232.87			2057	78	129	10024.2							2057	67	102	8639.56				2057	69	100	8502.65				2057	76	118	9822.13
2058	70	106	8523.46				2058	74	108	9162.03			2058	75	116	10432.1							2058	68	106	8730.62				2058	74	108	8705.6				2058	71	109	9316.92
2059	67	101	8279.91				2059	73	110	8717.99			2059	81	126	10232.3							2059	65	101	8278.22				2059	74	112	8676.64				2059	80	125	9726.29
2060	71	105	8636.59				2060	70	103	8849.66			2060	71	108	9405.59							2060	69	103	8539.49				2060	70	104	9015.18				2060	72	109	9480.92
2061	68	102	8684.69				2061	67	99	8380.31			2061	77	122	9232.01							2061	67	102	8216.93				2061	67	96	7783.15				2061	77	122	9338.45
2062	68	103	8182.49				2062	69	102	8945.56			2062	82	128	10446.8							2062	67	103	8369.59				2062	68	101	8853.99				2062	81	130	10249.7
2063	69	102	8232.68				2063	70	104	9304.96			2063	74	112	9946.01							2063	68	102	8709.74				2063	70	105	9286.28				2063	72	108	9421.62
2064	69	101	8669.15				2064	67	99	7726.4			2064	77	114	10489.3							2064	68	100	8488.07				2064	69	102	8188.22				2064	77	113	9943.02
2065	68	103	8474.57				2065	64	99	5864.69			2065	82	123	10168.3							2065	67	105	8287.04				2065	65	99	7745.91				2065	80	122	10154
2066	66	98	8358.17				2066	64	97	8161.35			2066	77	114	9448.53							2066	65	98	8407.7				2066	64	98	8106.78				2066	76	113	9541.44
2067	70	103	9429.66				2067	72	105	8973.12			2067	76	119	10307.1							2067	67	102	9416.1				2067	73	108	9022.64				2067	76	121	10164.8
2068	70	102	9396.93				2068	67	100	7751.77			2068	70	110	9364.17							2068	69	102	9749.4				2068	68	101	7953.26				2068	70	108	8338.58
2069	73	106	9274.36				2069	66	98	8724.1			2069	76	114	10240.2							2069	71	105	9407.55				2069	66	99	8323.16				2069	77	114	10077.9
2070	68	102	9083.09				2070	66	95	4652.2			2070	80	120	10419.8							2070	65	99	8372.8				2070	66	95	5478.57				2070	80	121	10498.4
2071	67	98	8872.45				2071	63	96	6641.81			2071	75	118	10080.9							2071	66	98	8664.07				2071	64	97	7635				2071	74	117	9749.84
2072	67	99	8606.13				2072	72	105	8947.27			2072	73	109	9805.27							2072	66	98	8488.32				2072	74	107	8952.03				2072	75	112	10111.4
2073	64	98	8149.25				2073	68	101	8617.42			2073	72	109	10205							2073	63	99	8515.11				2073	68	102	8729.66				2073	72	110	9674.63
2074	65	97	8244.94				2074	63	96	8330.34			2074	75	120	10844.4							2074	63	96	8387.08				2074	64	97	8307.06				2074	74	119	10517
2075	64	97	8410.47				2075	65	97	8212.27			2075	72	111	10000.3							2075	64	97	8498.11				2075	64	97	7810.71				2075	72	110	9738.01
2076	62	94	7754.21				2076	66	97	8052.62			2076	76	111	10588.7							2076	60	93	7588.58				2076	66	98	8171.99				2076	77	115	10418
2077	66	97	9405.56				2077	64	97	3108.39			2077	82	122	10977.8							2077	67	99	9710.58				2077	64	98	2880.11				2077	85	129	10756.6
2078	66	98	8887.8				2078	66	98	8188.98			2078	80	120	10476.6							2078	66	98	8959.75				2078	67	99	8358.53				2078	79	119	10814.4
2079	62	94	8075.45				2079	61	93	7396.99			2079	72	112	10219.8							2079	62	94	8358.31				2079	65	93	6710.93				2079	71	110	9577.69
2080	70	101	9284.36				2080	66	99	5245.38			2080	75	115	10984.8							2080	68	99	8933.35				2080	67	98	5935.28				2080	75	117	10313.8
2081	66	99	8908.06				2081	71	103	6488.18			2081	79	116	10730.3							2081	66	100	9245.72				2081	71	104	8213.48				2081	79	118	10284
2082	66	98	8966.83				2082	67	100	7088.5			2082	68	102	9229.24							2082	64	97	8791.75				2082	68	101	8363.65				2082	65	99	9213.32
2083	66	98	8601.38				2083	66	97	6851.71			2083	73	110	10218							2083	64	96	8517.87				2083	66	99	7207.56				2083	71	107	9775.47
2084	67	102	9289.45				2084	61	94	8393.75			2084	72	109	9959.54							2084	66	103	9208.23				2084	62	96	8535.15				2084	71	107	9636.93
2085	65	96	8838.33				2085	65	97	8703.48			2085	64	100	7916.32							2085	65	97	9315.57				2085	65	98	8433.45				2085	65	102	9348.08
2086	65	99	7635.44				2086	67	100	8836.64			2086	70	103	9909.85							2086	64	97	9383.18				2086	67	100	8504.67				2086	68	102	9717.11
2087	65	98	8843.78				2087	62	94	7693.86			2087	68	104	9960.29							2087	64	98	8987.99				2087	62	94	7411.19				2087	68	104	8955.05
2088	68	100	9850.91				2088	62	96	2857.87			2088	73	106	9999.28							2088	68	102	9925.31				2088	63	96	4461.37				2088	72	105	9446.66
2089	63	93	9261.91				2089	63	97	7965.73			2089	76	112	10913.6							2089	63	94	9579				2089	65	97	7865.49				2089	74	109	10588.7
2090	65	97	8410.98				2090	63	96	6880.04			2090	66	102	8957.85							2090	63	96	8676.3				2090	65	97	8095.19				2090	65	101	8238.41
2091	65	97	9426.33				2091	63	97	7012.04			2091	72	107	11081.5							2091	64	97	9490.37				2091	64	98	6916.09				2091	72	107	10747.4
2092	67	98	10072.1				2092	64	97	6922.72			2092	67	103	8959.25							2092	66	98	9802.84				2092	66	98	5904.04				2092	68	105	9778.12
2093	64	97	9383.57				2093	64	97	6620.89			2093	70	104	11100.4							2093	64	97	9745.95				2093	66	99	7090.95				2093	69	103	10169.9
2094	64	97	9808.31				2094	60	94	7394.73			2094	73	108	10781							2094	63	97	9763.62				2094	60	93	6897.17				2094	71	106	10199.7
2095	62	93	7752.83				2095	60	93	5161.34			2095	75	113	9092.57							2095	64	95	8513.98				2095	61	94	6686.14				2095	73	112	10009.1
2096	63	94	9093.62				2096	61	93	5725.56			2096	66	101	9865.68							2096	64	95	9440.19				2096	62	94	7732.57				2096	65	101	10085.2
2097	64	96	7028.63				2097	66	100	8132.44			2097	75	109	10450.2							2097	64	96	8653				2097	66	100	7011.89				2097	73	108	10032.5
2098	61	92	8477.66				2098	60	93	8225.02			2098	72	108	10494.1							2098	60	92	8735.25				2098	62	94	8039.94				2098	69	104	9937.73
2099	61	92	8611.75				2099	61	94	7493.19			2099	66	99	9492.92							2099	60	92	9089.74				2099	61	94	6990.48				2099	64	97	9043.83
2100	61	94	9015.5				2100	64	98	6607.69			2100	64	98	8050.02							2100	60	93	9206.38				2100	64	97	6836.04				2100	64	99	9260.43
