# Supplementary material for: Effects of temperature frequency trends on projected japonica rice (Oryza sativa L.) yield and dry matter distribution with elevated carbon dioxide
Source: PeerJ. 2021 Mar 11;9:e11027. doi: 10.7717/peerj.11027 (PMC7956007; doi:10.7717/peerj.11027)
Supplement: Supplemental Information 6 [file peerj-09-11027-s006.xlsx]

## Sheet: RCP 2.6
Zhongwei station																										Yongning station
MIROC5								IPSL-CM5A-MR								GFDL-ESM2G										MIROC5								IPSL-CM5A-MR								GFDL-ESM2G
Year	Photosynthetic production (kg/ha)	Aboveground biomass (kg/ha)	ear (kg/ha)	leaf+stem (kg/ha)				Year	Photosynthetic production (kg/ha)	Aboveground biomass (kg/ha)	ear (kg/ha)	leaf+stem (kg/ha)				Year	Photosynthetic production (kg/ha)	Aboveground biomass (kg/ha)	ear (kg/ha)	leaf+stem (kg/ha)						Year	Photosynthetic production (kg/ha)	Aboveground biomass (kg/ha)	ear (kg/ha)	leaf+stem (kg/ha)				Year	Photosynthetic production (kg/ha)	Aboveground biomass (kg/ha)	ear (kg/ha)	leaf+stem (kg/ha)				Year	Photosynthetic production (kg/ha)	Aboveground biomass (kg/ha)	ear (kg/ha)	leaf+stem (kg/ha)
2006	31482.5	24346.5	11367.2	12979.3				2006	30599.7	23700.5	10016.9	13683.6				2006	31485.4	24303.6	11142.5	13161.1						2006	30182.6	23441.4	10906.2	12535.2				2006	29642.5	22861.1	9733.59	13127.5				2006	31940.4	24675.8	11015.3	13660.6
2007	32249	24886.7	10158	14728.7				2007	30788.3	23757.5	11390.7	12366.8				2007	28667.2	22079.9	10730.7	11349.2						2007	30794	23643.3	10012.4	13630.9				2007	31263.1	24115.3	11058.4	13056.9				2007	29037.2	22343	10644.4	11698.6
2008	29000.5	22236.5	10157.6	12078.9				2008	29752.9	22786.4	10385.4	12401.1				2008	24952	18977.8	9580.08	9397.7						2008	28768	22128.1	10486.3	11641.8				2008	29561.1	22689.9	10262.6	12427.3				2008	25171.6	19172.3	9663.73	9508.53
2009	28194.5	21799.2	9977.53	11821.7				2009	28018.6	21738.6	10511	11227.6				2009	31412.9	23986.8	9863.4	14123.4						2009	28024.9	21642	9832.29	11809.7				2009	28055.3	21835.3	10526.3	11309				2009	32053.1	24379.9	9557.94	14822
2010	30620.9	23598.4	10492.8	13105.6				2010	28238.3	21589.1	10107.7	11481.3				2010	31179.6	23935.8	10950.2	12985.5						2010	29684.6	22976.6	10077.3	12899.3				2010	28778	22080	10027.2	12052.8				2010	30666.5	23577.5	10757.3	12820.2
2011	28910.2	22304	10688.5	11615.5				2011	26908.1	20388.3	10042	10346.3				2011	30684.2	23651.9	11143.4	12508.5						2011	28547.7	22116.3	10611.8	11504.5				2011	26798.6	20280.7	9907.56	10373.2				2011	30543.9	23594.2	11163.3	12430.9
2012	28971.7	22123	9999.07	12124				2012	29245.6	22580	10781.5	11798.5				2012	31958	24641.7	10344.7	14296.9						2012	28195.2	21562.4	10073.5	11488.9				2012	29593.2	22822.8	11138	11684.8				2012	31707.7	24408.3	10281.2	14127.2
2013	27634.5	21268.7	9905.81	11362.9				2013	29165.3	22597.3	10542.3	12055				2013	27900.3	21361.4	9916.37	11445						2013	27928.7	21107.5	10380.9	10726.6				2013	27479.4	20942.9	9881.6	11061.3				2013	27778.9	21323.4	10174	11149.4
2014	25156.1	19079.5	9193.45	9886.08				2014	29608.2	22580	10292.2	12287.8				2014	30245.4	23248.2	10218	13030.2						2014	24233.5	18558.7	8976.24	9582.49				2014	29397	22498.6	10284	12214.6				2014	30297.8	23293.5	10578.6	12714.9
2015	27788.4	21362.2	9287.05	12075.2				2015	28208.8	21772.4	9763.49	12008.9				2015	27636	21413	10121.2	11291.7						2015	25757.3	19833.5	8819.17	11014.4				2015	28175.5	21679.7	10019.9	11659.8				2015	27694	21427.8	9973.6	11454.2
2016	29347.1	22715.6	10863.7	11851.9				2016	29530.2	22712.6	10397.1	12315.5				2016	31718.2	24573.2	11125.5	13447.6						2016	29184.8	22649.4	10749.9	11899.6				2016	30074.4	23082.6	10624.3	12458.3				2016	30992.5	23952.3	11171.2	12781.1
2017	27578.9	21105.9	10246.4	10859.6				2017	27472.8	21064.8	9345.85	11718.9				2017	28777.6	22300.2	10291.3	12008.9						2017	27211.9	20732.9	10099.3	10633.6				2017	27353.6	20974.6	9917.9	11056.7				2017	27720.8	21509.7	10092.4	11417.3
2018	27234.4	21126.6	10219	10907.6				2018	26014	19765.6	10270.4	9495.21				2018	30292.5	23228.7	10344.4	12884.2						2018	27204.4	21037.4	10028.4	11009				2018	25983	19721.3	10307.1	9414.21				2018	29661.2	22736.5	10306.6	12429.8
2019	28952.8	22309.4	10412.2	11897.2				2019	27735.3	21433.4	9881.89	11551.5				2019	28424.3	21809.2	9884.54	11924.7						2019	28223.2	21816.1	10087.7	11728.4				2019	29003.2	22208.1	10146.4	12061.6				2019	27861	21437.3	9548.39	11888.9
2020	28339.5	21886.2	10615	11271.2				2020	27422.5	20995.2	9688.86	11306.3				2020	29286.2	22548.7	10748.3	11800.4						2020	27717.5	21597.9	10441.3	11156.6				2020	25824.6	19739.7	9122.18	10617.5				2020	28786.5	22253.3	10945.4	11307.9
2021	28803.6	22311.3	10196.7	12114.7				2021	26604.8	20409.4	10485.7	9923.67				2021	31854.7	24594.5	10618	13976.5						2021	28491.7	21928.1	10304.1	11623.9				2021	26658	20611.6	10196.8	10414.8				2021	32306.3	24982.4	9915.19	15067.2
2022	28210.2	21813.6	9950.45	11863.2				2022	29119.2	22391.7	10364.8	12026.9				2022	31391	24238.5	10517.3	13721.2						2022	27831.2	21437.3	9847.66	11589.6				2022	29662.5	22754.3	10227.3	12527.1				2022	30862.2	23896.4	10502.2	13394.3
2023	27748.9	21240.1	10348.2	10891.9				2023	28236.8	21456.5	10764.2	10692.3				2023	28391.9	21737.9	9955.88	11782.1						2023	27344.9	20917.9	10364.7	10553.1				2023	27727.2	21296.2	10588.4	10707.9				2023	28724.2	22141.8	10281.9	11860
2024	30519.4	23480.1	10675	12805.1				2024	27530	21397.4	10727.2	10670.2				2024	33302.9	25642.4	11762.9	13879.5						2024	31195.9	23910.2	10843.3	13066.9				2024	26297.7	20334.4	10188.4	10146				2024	31664.4	24423.6	11385	13038.6
2025	26536.1	20285.8	9580.92	10704.8				2025	25547.8	19533.3	9743.55	9789.72				2025	29304.9	22501.1	10696.5	11804.6						2025	26943.5	20796	9837.77	10958.2				2025	24393.7	18598.2	9415.79	9182.36				2025	29538.5	22732.1	10578.4	12153.7
2026	29553.8	22793.8	10443.4	12350.4				2026	28392.7	21775.9	10198.7	11577.1				2026	30681.4	23721.8	11290.4	12431.4						2026	28604.5	22070.1	9889.96	12180.1				2026	28786.7	22242.5	10334.4	11908.1				2026	29593	22928.9	11312.4	11616.5
2027	27992.8	21683.8	10416.9	11266.9				2027	30022	23125.8	10885.1	12240.7				2027	31080.8	23972.5	11296.7	12675.7						2027	27354.1	21001.8	10329.5	10672.3				2027	30099.5	23069.6	11193	11876.6				2027	30074.1	23258.2	10641.7	12616.4
2028	26115.2	19782	9802.34	9979.65				2028	28430.6	22020.8	10533.5	11487.3				2028	30322.3	23386.1	10624.4	12761.7						2028	26865.3	20224.8	9893.02	10331.8				2028	29449.3	22871.1	11059.8	11811.3				2028	31473	24353.9	11501.7	12852.2
2029	26578.8	20341.2	9763.02	10578.1				2029	29135.7	22595.6	10494.8	12100.8				2029	32125.1	24513.1	10302.5	14210.6						2029	26215.8	19877.5	9452.61	10424.9				2029	28665.3	22198.6	10155.8	12042.8				2029	30492	23346.4	10210.4	13136.1
2030	25769.1	19626.1	9617.11	10009				2030	26166	20060.8	10136.1	9924.77				2030	31529.2	24278.3	11371.4	12906.9						2030	25647.5	19523.5	9585.02	9938.52				2030	25889.1	19757.4	9986.05	9771.36				2030	31603	24286.5	10538.5	13748
2031	28018.2	21652	10292.7	11359.2				2031	31986.3	24467.6	10516.5	13951.1				2031	29724.7	22646	10702.1	11943.9						2031	29097.6	22391.1	10733.1	11658				2031	31127.4	23875	10345.3	13529.6				2031	30337.1	23034.4	10256.8	12777.6
2032	30016.9	23205.3	10744.7	12460.6				2032	27490.2	20738.3	10099.8	10638.6				2032	27908.6	21038.2	10229.7	10808.5						2032	30596.1	23664.8	10682.3	12982.6				2032	26492.9	20123.2	9251.75	10871.5				2032	27154	20768.5	9906.37	10862.1
2033	24465.9	18566.9	9163.58	9403.29				2033	26505.9	20469.6	9720.96	10748.6				2033	33008.7	25343.4	10511.8	14831.7						2033	25190.7	19102.5	9130.96	9971.52				2033	25854.1	19752.6	9683.76	10068.9				2033	33454.8	25693.9	10590	15103.9
2034	26897.9	20518.9	9981.44	10537.4				2034	30089.7	23123	10918.8	12204.2				2034	31578.6	24469.7	10531.9	13937.9						2034	27696.3	21069.4	10615.6	10453.8				2034	29830.4	22936.7	10737.4	12199.2				2034	31344.4	24222.8	10586.9	13635.9
2035	26990.3	20558.3	9949.35	10608.9				2035	26057.7	20006.9	9531.87	10475				2035	30706	23741.6	11487	12254.6						2035	26433.9	20020.4	9834.07	10186.4				2035	28088.8	21532.4	9861.18	11671.2				2035	30077.6	23246.7	11342.7	11904
2036	26962.8	20536.9	9866.52	10670.4				2036	36632	28331.4	12280.6	16050.8				2036	32571.4	25057.7	11806.5	13251.2						2036	27720	21409.7	10110.6	11299.1				2036	36325.1	28355.9	12040.7	16315.2				2036	33004.6	25344.4	11712.5	13632
2037	26493.5	20122.4	9457.57	10664.8				2037	30032.4	23113.5	11105.5	12008.1				2037	25378.8	19531	10087.6	9443.4						2037	27463.5	21018.9	9606.31	11412.6				2037	30310	23424.5	11125.9	12298.6				2037	24721	19084.1	9493.22	9590.85
2038	25710.6	19547.2	9708.99	9838.18				2038	28541.4	21905.9	10063.4	11842.5				2038	30602.3	23533.1	10682.3	12850.8						2038	26457.6	20063	10010.5	10052.4				2038	28403.2	21738.4	9943.27	11795.1				2038	30195.9	23229.3	10513.2	12716.1
2039	25914.1	19812.9	9884.24	9928.66				2039	28286.9	21890.8	10211.3	11679.5				2039	31356.5	23983.7	10077.1	13906.6						2039	26413.8	20268.1	9806.28	10461.8				2039	27589.7	21345.3	10083.5	11261.8				2039	30643.4	23833.6	9427.78	14405.9
2040	25311.8	19444.5	9318.16	10126.3				2040	30053.6	23200.8	11195	12005.7				2040	30611.3	23369.9	10585.7	12784.2						2040	26840.8	20605.4	9787.43	10818				2040	29565.4	22974.2	11366.4	11607.8				2040	29987.7	22910.4	10439.9	12470.6
2041	26089.5	20026.8	9820.34	10206.4				2041	27557.1	21196.5	10027.9	11168.7				2041	29374.6	22363	8679.13	13683.9						2041	26753.7	20447.3	10306.4	10140.9				2041	26628	20160.1	9622.37	10537.7				2041	28134	21468.3	9532.43	11935.9
2042	26094.1	19890.7	9823.61	10067.1				2042	29441.5	22595.7	10794.8	11800.9				2042	27769.4	21384.2	10556.4	10827.8						2042	27569.8	21215	10290.9	10924.1				2042	29410.2	22652.1	11272.2	11379.9				2042	27667.5	21144.9	10645.8	10499.1
2043	26505.3	20040.8	9678.06	10362.7				2043	26604.6	20442.1	9663.01	10779.1				2043	33091.4	25393.2	10596.6	14796.6						2043	26591.1	20340.7	9741.56	10599.2				2043	26688.1	20476	9769.68	10706.3				2043	32200.6	24784.5	10758.3	14026.2
2044	27250.8	20819.2	10202.6	10616.6				2044	28901	22324.5	10446.4	11878.1				2044	28632.8	21652.4	10676.2	10976.3						2044	28717.8	21999.6	10679.6	11319.9				2044	29060.9	22380.5	10428.7	11951.8				2044	29030.3	22085.9	10798.9	11287
2045	24056.7	18289.6	8842.44	9447.17				2045	28020	21364.1	10681.1	10683				2045	32862.5	25468.5	11458.5	14010						2045	25160.4	19196.8	9516.04	9680.73				2045	27264	20765.9	10683	10083				2045	31130.4	24187.4	11378.4	12809
2046	25459.2	19500.5	9661.44	9839.03				2046	24615.1	18788	9671.94	9116.05				2046	31292.9	24221.6	11035.3	13186.3						2046	25553.4	19504.7	9433.47	10071.2				2046	23758.4	18164	9422.24	8741.76				2046	29933.5	23098.1	10985.5	12112.5
2047	25389.8	19565.3	9087.67	10477.6				2047	26907.9	20357.7	10039.2	10318.5				2047	28802.3	22152.4	10116.7	12035.7						2047	24997.6	19070.9	9243.75	9827.15				2047	27207.6	20782.1	10223.3	10558.8				2047	28917.2	22280.3	10385.3	11894.9
2048	25913.6	19571.8	9603.9	9967.92				2048	26901.5	20532.9	10137	10395.9				2048	31636.4	24384.4	11111.6	13272.7						2048	26961.3	20512.7	10087.5	10425.2				2048	26286.5	20107.1	9936.27	10170.9				2048	30498.1	23505.6	10638.8	12866.9
2049	27535.6	20832.1	10071.7	10760.4				2049	24001.2	18255	9070.91	9184.1				2049	33354.6	25498.6	11118.2	14380.4						2049	28878.3	22037.1	10624.1	11412.9				2049	23048.6	17565.4	8781.35	8784.09				2049	30903.5	23657.5	10738.2	12919.3
2050	30171	23524.4	11576	11948.3				2050	25005.4	19071.9	9520.42	9551.49				2050	33102.9	25231.6	10458.5	14773.1						2050	30676.4	23885.5	11631.8	12253.7				2050	25454.3	19445.6	9608.64	9836.91				2050	32595.6	24842.7	10514.9	14327.8
2051	26468.3	20150.3	10043.6	10106.7				2051	27148.8	20529.1	9855.28	10673.8				2051	32676.5	25192.2	12276.2	12916						2051	27881.5	21325.5	10484.3	10841.2				2051	26213.1	19900	9453.49	10446.5				2051	30937.5	23966.7	11683.6	12283.1
2052	26892.9	20440.8	10102.9	10337.9				2052	31724.1	24391.4	11565.9	12825.4				2052	28564.5	21959	10567.7	11391.3						2052	27229.5	20723.1	10342.4	10380.7				2052	31188.7	23940.4	11582.5	12357.9				2052	27879.8	21518.2	10310.6	11207.7
2053	25193.9	19187.3	9574.72	9612.58				2053	24448.2	18801.2	8881.69	9919.5				2053	30448.8	23213	10462	12750.9						2053	26193	19958.3	9980.48	9977.86				2053	24786.1	18819.5	9086.1	9733.35				2053	30053.4	22988.6	10090.7	12897.9
2054	28094.6	21572.6	9783.93	11788.6				2054	28781.3	22016.6	10662.5	11354.1				2054	31834.2	24401	10437.9	13963.1						2054	29067.2	22036.5	10289.2	11747.3				2054	28303.9	21659	10466.6	11192.4				2054	31028.4	23720.1	9777.42	13942.7
2055	27972.6	21505.4	9720.19	11785.2				2055	26866.4	20462.3	9858.29	10604.1				2055	33558.5	25914.2	11040.5	14873.7						2055	28356.9	21697.7	9918.9	11778.8				2055	25985.4	19596.1	9575.71	10020.4				2055	32665.7	25124	10571	14553.1
2056	26608.7	20209.8	9831.96	10377.9				2056	30969	23827.4	10737.3	13090				2056	31802.3	24616.2	10683	13933.3						2056	25920.2	19710.1	9510.37	10199.8				2056	30907.6	23842.2	10952.6	12889.6				2056	31027.1	23950.3	10550	13400.3
2057	27285.4	20996.5	10005.4	10991				2057	25113.4	19040.6	8965.03	10075.5				2057	29298.3	22545.3	10388.2	12157.1						2057	27560.9	21233.6	10416.9	10816.7				2057	25057.6	19041.3	9126.7	9914.63				2057	29411.5	22602.8	10549.5	12053.3
2058	26793.2	20407.8	10277.1	10130.6				2058	30277.8	23419.9	11096.3	12323.6				2058	32262.8	24783.6	11673	13110.6						2058	27625.6	21171.8	10486	10685.8				2058	30527.3	23650.2	11233.8	12416.4				2058	31108.1	23973.9	11368	12605.9
2059	27568.4	21062.2	10198.7	10863.5				2059	27930.8	21163.4	10531.9	10631.5				2059	31477.4	24321.1	11137.8	13183.3						2059	28237.8	21714.7	10758.2	10956.5				2059	26534.6	20224.4	10229.8	9994.54				2059	30236	23283.8	10468.1	12815.6
2060	28057.5	21598	9986.17	11611.8				2060	27683.3	21110.4	10423	10687.4				2060	30685.3	23784.9	10949.3	12835.6						2060	28817.8	22067.3	10496	11571.4				2060	26753.4	20435.5	10051.3	10384.2				2060	30796.7	23924.6	11253.8	12670.8
2061	27352.7	20978.4	10092	10886.3				2061	28796.5	22187.9	10753.8	11434				2061	31815.4	24334.5	10733.3	13601.1						2061	27144.9	20706.4	10385.9	10320.5				2061	29115	22426	10735.1	11690.9				2061	30915.8	23601.1	10401.4	13199.7
2062	26475.5	20033.3	9585.43	10447.9				2062	26619.6	20194	10080.3	10113.8				2062	33234.8	25391.3	10124.7	15266.6						2062	26843.4	20521.6	10030	10491.5				2062	26309.5	20029.8	10074.5	9955.38				2062	32466	24807.5	9902.08	14905.4
2063	26268.5	20018.5	9437.11	10581.4				2063	27035.8	20506.1	10278.4	10227.7				2063	32498.6	25205.3	11993.8	13211.5						2063	27246.4	20877.2	10016.7	10860.5				2063	25530.2	19331.5	9460	9871.48				2063	31003.8	24083.1	11530.4	12552.6
2064	26081.4	19984.1	9670.2	10313.9				2064	26984.3	20490.6	10344.9	10145.8				2064	33484.7	25824.6	11710.8	14113.8						2064	26461.1	20386	9778.87	10607.1				2064	25451	19574.5	10058.4	9516.16				2064	33311.5	25740.5	11678.3	14062.2
2065	23276.6	17824.6	9231.99	8592.62				2065	27399.3	20806.6	10278.8	10527.9				2065	31898.1	24567	11002.3	13564.7						2065	23823.2	18441.5	9200.22	9241.31				2065	27312	21040.5	10217	10823.6				2065	31426.2	24183.4	10742.2	13441.2
2066	24927.3	19209.6	9190.96	10018.6				2066	29144.4	22372.3	10172.7	12199.6				2066	30162	23033.8	10546.2	12487.6						2066	26231.3	20218.5	9870.19	10348.3				2066	27546.2	21005.7	9826.42	11179.3				2066	28273.1	21630.6	9992.22	11638.4
2067	26066.6	19887.8	9667.87	10220				2067	28307.6	21542.3	10499	11043.3				2067	31855	24446.2	10583.3	13862.9						2067	27230	21032.5	10216.7	10815.8				2067	27014.3	20647.8	10207	10440.7				2067	31557.4	24122.1	10248.1	13874.1
2068	24994.8	19025.4	9488.94	9536.44				2068	28193.2	21542.2	10344.1	11198.2				2068	33223.3	25661.4	11301.6	14359.9						2068	26166	19968.4	9847.74	10120.6				2068	26782.6	20486.4	9970.96	10515.5				2068	31734.5	24387.8	10939.6	13448.3
2069	26316.4	20105.2	9791.93	10313.3				2069	28649.9	22131.8	11169.2	10962.6				2069	30269.4	23558.1	10941.8	12616.3						2069	28127.3	21282.8	10587.8	10694.9				2069	27517.4	21297.5	10803.4	10494				2069	30193.4	23554	11018.3	12535.8
2070	26041.8	19862.9	9766.47	10096.4				2070	24324.2	18642.7	8796.91	9845.8				2070	35419.7	27395.3	11755	15640.3						2070	25601	19621.1	9656.21	9964.93				2070	23239	17830.6	8468.95	9361.61				2070	34753.2	26738.8	11569.5	15169.2
2071	26056.9	19705.3	9645.23	10060.1				2071	25411.4	19201.1	9457.46	9743.65				2071	31821	24669.3	11352.4	13316.9						2071	27369.1	20731.9	9965.02	10766.8				2071	26075.1	19866.6	9289.46	10577.1				2071	30988.3	24034.8	11287.5	12747.3
2072	23599.5	18085	9255.43	8829.61				2072	27044.8	20609.4	9658.02	10951.4				2072	33052.3	25682.4	12138.3	13544						2072	23883.2	18291.7	9314.53	8977.12				2072	27232.8	20794.1	9779.07	11015				2072	32656	25320.4	11817.9	13502.5
2073	27107	20731.7	10151.6	10580.1				2073	25053.7	19037.1	9246.18	9790.93				2073	31454.6	24164.4	10914.5	13249.9						2073	27044	20763.1	10104.5	10658.7				2073	25083.1	18995.5	9327.27	9668.2				2073	32791.8	25019.6	11111.1	13908.5
2074	25012.1	19057.4	9349.31	9708.1				2074	27311.5	20765.9	9865.39	10900.5				2074	29165.8	22142.9	10343.6	11799.3						2074	24584.5	18710.6	9142.69	9567.96				2074	26587.9	20419.4	9790.18	10629.3				2074	28800.2	22018.7	10373.1	11645.6
2075	25077.1	19122.9	9473.83	9649.02				2075	27977.7	21207.4	10398.9	10808.5				2075	37146.6	28491.1	11767.5	16723.6						2075	25209.6	19164.9	9754.25	9410.69				2075	25770.5	19698.7	9643.26	10055.4				2075	35544.4	27234.4	11208	16026.5
2076	25887.4	20021.5	10041.4	9980.05				2076	32178.3	24747.6	11996.5	12751.1				2076	30393	23357.2	10976	12381.2						2076	26805.4	20720.4	10515.5	10204.9				2076	32871.8	25348.8	12281	13067.8				2076	30441.4	23535.9	11089.1	12446.8
2077	25351.8	19247.7	9576.35	9671.36				2077	24098.5	18364.5	8308.31	10056.2				2077	30717.3	23604.6	10617.6	12987						2077	25726	19580.3	9908.23	9672.03				2077	24037	18272.4	8691.38	9581.01				2077	30276.7	23344.4	10588.3	12756.2
2078	28049	21786.1	10188.9	11597.2				2078	25414.9	19294.1	9504.34	9789.73				2078	32408.6	24795.8	10755.2	14040.6						2078	29353.6	22677.9	10397.2	12280.8				2078	24843.3	19037.6	9492.72	9544.92				2078	31152.8	23848.5	10544.7	13303.9
2079	28535.2	21747.4	9987.49	11759.9				2079	30263.7	23293.5	10438.7	12854.8				2079	28854.2	22198.1	11158.3	11039.8						2079	29382.7	22545.2	10498.5	12046.7				2079	28812.8	22110.3	10048.6	12061.7				2079	28890.3	22279.4	11024.7	11254.7
2080	26560.3	20338.7	9705.91	10632.8				2080	31139	23956.5	10837.8	13118.7				2080	31201.8	23909.8	11257.7	12652.1						2080	26489.3	20139.2	9718.23	10421				2080	29967.6	23118.5	10472.8	12645.8				2080	29513.8	22663.1	10623.7	12039.4
2081	26146.8	20088.8	9849.48	10239.3				2081	26393.4	19912.8	9839.48	10073.3				2081	28543	22204.1	11195.9	11008.2						2081	26600.4	20177.5	10129.2	10048.2				2081	27093.4	20941	10264.1	10676.8				2081	28777.8	22462.5	11505.3	10957.2
2082	26133	20191	9766.4	10424.6				2082	29496.3	22674.8	10214.8	12460				2082	30689.6	23522.3	11078.9	12443.4						2082	26217.2	19930.5	10042.1	9888.45				2082	28704.9	22089.6	10246.6	11843				2082	30268.8	23402.4	11324.1	12078.2
2083	27379.6	21114	10300.8	10813.1				2083	28930.7	22251.3	10177.3	12074.1				2083	32383.6	24764.8	11458.4	13306.4						2083	27835.1	21184.8	10694.4	10490.4				2083	28143.2	21699.6	9921.81	11777.8				2083	30577.5	23595.5	10914.9	12680.6
2084	25550.6	19206.2	9343.18	9863.07				2084	26133.1	19801	9945.35	9855.61				2084	30552.7	23255.3	10355.5	12899.9						2084	25289.6	18943.9	9395.48	9548.41				2084	25281.8	19108.4	9731.88	9376.49				2084	30328.6	23124.7	10322.7	12802
2085	24002.9	18571.9	9131.73	9440.12				2085	26664.1	20255.8	10149.1	10106.7				2085	29733.4	22886.6	10970.5	11916.2						2085	24473.4	18735.5	9488.71	9246.83				2085	26348.4	19911.3	10131.6	9779.73				2085	28632.2	22003.2	10845.3	11157.9
2086	28127.8	21547	10404.1	11143				2086	25488.9	19142.1	9052.45	10089.6				2086	28023.7	21626.5	10013.8	11612.7						2086	28911.1	22143	11060.2	11082.7				2086	24724.1	18616.4	8910.49	9705.94				2086	27057.3	20890	9567.39	11322.6
2087	24964.9	18972.9	9284.84	9688.03				2087	27291.3	20687.3	10330.1	10357.2				2087	33795.3	26093.7	11336.6	14757						2087	25737.1	19529.7	9660.32	9869.35				2087	26853.8	20337.2	10289.1	10048				2087	33803.4	25959.1	10851.5	15107.6
2088	23610.2	18042.7	8694.68	9348.03				2088	27092.2	20542.4	10329	10213.4				2088	31776.4	24226.9	10916	13310.9						2088	25153.1	19198.5	9143.23	10055.3				2088	27436.8	20937.3	10632.7	10304.6				2088	30712.8	23454.6	10603.2	12851.4
2089	26589.7	20227.6	9741.96	10485.6				2089	27550.5	21194	10024.4	11169.7				2089	31769.7	24376.9	10987.7	13389.2						2089	28680.6	22038.5	10538.3	11500.2				2089	26932.9	20575.7	9872.93	10702.7				2089	31728.9	24354.7	10942.9	13411.8
2090	25457.3	19418.4	9344.85	10073.6				2090	27067	20406.4	9562.14	10844.3				2090	30269.2	23306.2	10312.4	12993.8						2090	25688.6	19561.7	9550.02	10011.7				2090	27066.9	20428.7	9648.61	10780.1				2090	29732.8	22872.7	10276.3	12596.4
2091	26954.3	20475.3	10100.9	10374.4				2091	27094.6	20552	10513.4	10038.6				2091	31417.6	24073.8	11768.8	12305						2091	26448.9	20139.3	9765.85	10373.5				2091	25884.5	19625.7	10215.6	9410.09				2091	30843.7	23677.2	11811.3	11865.9
2092	25414.3	19297.5	9035.79	10261.7				2092	26502.2	19950.4	10243.6	9706.81				2092	32726.8	25230.2	11173.6	14056.6						2092	25480.5	19403.8	9120.02	10283.8				2092	25445.4	19318	9775.57	9542.4				2092	31086.2	23989.5	11088	12901.6
2093	25902.6	20025.8	9037.79	10988				2093	28723.8	22091.9	10321.4	11770.5				2093	27351.6	21350.3	10925.4	10424.9						2093	25753.7	19747.3	9229.25	10518.1				2093	28781.6	22080	10317.8	11762.3				2093	27396.8	21455.1	10905.1	10550
2094	25498.2	19199.8	9331.13	9868.64				2094	25573.8	19472	9176.87	10295.1				2094	33231.5	25501.2	12232.8	13268.4						2094	25743	19488.4	9307.05	10181.3				2094	24203.8	18217.4	9132.91	9084.46				2094	32500.5	24959.6	11845.9	13113.7
2095	25677.6	19543.9	9640	9903.89				2095	28296.6	21931.3	10055.2	11876.1				2095	32852.3	25318.5	11700.4	13618.1						2095	26248.9	19911.9	9908.6	10003.3				2095	26330.8	20233.5	9554.23	10679.3				2095	31168.2	24089.2	11524.9	12564.2
2096	27689.5	21263.1	9923.45	11339.6				2096	26923.4	20437.2	9903.17	10534				2096	33491.9	25803.2	11549.7	14253.6						2096	27569.1	20808.6	9742.54	11066.1				2096	27379.2	21065	10165.8	10899.2				2096	33618.4	25923.2	11280.3	14643
2097	26325.7	20352.4	9527.39	10825				2097	30348.4	23522.3	11480	12042.3				2097	33002.3	25515.8	11524.3	13991.5						2097	26828.5	20708	9741.62	10966.4				2097	28989.9	22277	11044.3	11232.7				2097	31487.5	24258.9	11095.6	13163.3
2098	26963.5	20656.2	9065.88	11590.4				2098	26288.1	20438.7	10514.3	9924.42				2098	30961.1	23714	10686.9	13027.1						2098	26916.7	20648.3	9299.98	11348.3				2098	25825.9	19928.4	10180.1	9748.32				2098	30262.7	23177.3	10821	12356.4
2099	27262.1	20899.8	9457.92	11441.9				2099	32598.2	25409.9	10355.6	15054.3				2099	26748.9	20563.1	10265.5	10297.6						2099	27861.8	21358.2	10060.3	11297.9				2099	31942.8	24876.4	10010.4	14866				2099	27472.7	20935.1	10565.3	10369.8
2100	26497.8	20467.3	9469.57	10997.7				2100	26282.1	20137.4	9782.92	10354.5				2100	29167.8	22292.4	10041.8	12250.6						2100	26670.8	20638.3	9566.98	11071.3				2100	25591.4	19443.2	9579.14	9864.07				2100	28619.9	21923.9	10309.9	11614.1

## Sheet: RCP 4.5
Zhongwei station																										Yongning station
MIROC5								IPSL-CM5A-MR								GFDL-ESM2G										MIROC5								IPSL-CM5A-MR								GFDL-ESM2G
Year	Photosynthetic production (kg/ha)	Aboveground biomass (kg/ha)	ear (kg/ha)	leaf+stem (kg/ha)				Year	Photosynthetic production (kg/ha)	Aboveground biomass (kg/ha)	ear (kg/ha)	leaf+stem (kg/ha)				Year	Photosynthetic production (kg/ha)	Aboveground biomass (kg/ha)	ear (kg/ha)	leaf+stem (kg/ha)						Year	Photosynthetic production (kg/ha)	Aboveground biomass (kg/ha)	ear (kg/ha)	leaf+stem (kg/ha)				Year	Photosynthetic production (kg/ha)	Aboveground biomass (kg/ha)	ear (kg/ha)	leaf+stem (kg/ha)				Year	Photosynthetic production (kg/ha)	Aboveground biomass (kg/ha)	ear (kg/ha)	leaf+stem (kg/ha)
2006	29824	22959.7	10575.2	12384.5				2006	31893.9	24691.6	10430.8	14260.9				2006	28707.6	22278.5	10604.7	11673.9						2006	28579.3	22045.3	10387.2	11658.1				2006	30225.5	23434.7	10793.9	12640.9				2006	28337.4	21906.9	10581	11325.9
2007	31056.3	23989.8	11315.8	12673.9				2007	27630.3	21355.9	10101.3	11254.6				2007	28504	21742.7	10472.4	11270.3						2007	30596.4	23708.2	11335.5	12372.6				2007	26581.6	20422	9921.3	10500.7				2007	27476.4	20963.2	10290	10673.2
2008	31466.2	24195.6	10128	14067.6				2008	31619.4	24415.6	11668	12747.6				2008	31018.5	24057.3	11585.2	12472						2008	30228	23200.1	9765.62	13434.5				2008	29587.4	22868.2	10889.7	11978.5				2008	29589.6	23084.4	11162.4	11922.1
2009	28345.7	21599.7	9577.68	12022				2009	26693.6	20445.9	9496.56	10949.3				2009	29214	22433.4	9609.58	12823.9						2009	26783.3	20466	9400.93	11065				2009	26706	20520	9832.29	10687.7				2009	28379.9	21753.8	9475.01	12278.8
2010	31129.4	23993.9	10377.8	13616.1				2010	26853.4	20397.8	10009.9	10387.9				2010	25188.9	19389.8	9959.63	9430.14						2010	29433.4	22727.2	10499.8	12227.4				2010	25696.4	19538.6	9815.64	9722.97				2010	24784	19151.4	9773.5	9377.94
2011	29476.7	22558.1	9891.75	12666.3				2011	27920.8	21583.1	10400.6	11182.5				2011	33914.2	26247.2	10558.3	15689						2011	28112.5	21472.5	9682.08	11790.4				2011	27454.8	21259.1	10187.6	11071.5				2011	32726	25112.4	10939.1	14173.3
2012	29949.2	22927.6	10169.9	12757.6				2012	27696.3	21217.7	9959.5	11258.2				2012	31271.4	23905.5	10110.2	13795.3						2012	29048.9	22280.1	9933.9	12346.2				2012	27019.5	20648.4	9557.7	11090.7				2012	29113.9	22389.2	9840.22	12549
2013	29264.1	22445	10144.8	12300.2				2013	30906.4	23696.7	10465.1	13231.6				2013	30568.5	23757.3	10490.6	13266.6						2013	27410.7	21076.3	9735	11341.3				2013	29006.6	22419.9	10425.4	11994.5				2013	30004.8	23290.4	10393.5	12896.9
2014	29409	22836.4	10575.9	12260.4				2014	27493.4	20904.9	10306.6	10598.3				2014	28650.5	21981.5	9884.4	12097.1						2014	28823.1	22294.1	10419	11875.1				2014	26166.4	20094.1	9673.2	10420.9				2014	29015.6	22385.9	10341	12044.9
2015	27266.1	20867.1	9760.76	11106.3				2015	30229.4	23204.1	10827.9	12376.2				2015	31589.9	24137.8	9782.19	14355.6						2015	25264.4	19406.7	9401.44	10005.2				2015	29076.2	22281.3	10377.4	11903.9				2015	31253.8	23828.6	9787.19	14041.4
2016	29201.9	22543.1	9968.64	12574.4				2016	28780.7	21958	9825.61	12132.4				2016	30128.4	22988.2	10472.3	12515.9						2016	28846.9	22307.6	10185.1	12122.5				2016	27312.6	20908.9	9894.6	11014.3				2016	28437.2	21801.7	10548.5	11253.2
2017	29926.6	23180.6	11066.4	12114.1				2017	29487.9	22861	10588.7	12272.2				2017	27398.9	21252	10172.9	11079.1						2017	30113.2	23424.5	11555.1	11869.4				2017	30252.4	23524.1	10841.8	12682.4				2017	26858.3	20765.7	10005.3	10760.4
2018	29412.5	22637.8	10403.3	12234.5				2018	25610.3	19460	9609.14	9850.9				2018	30759.2	23734.8	11045.6	12689.2						2018	28493.4	21970.1	10621.8	11348.3				2018	23927.4	18285.1	8869.54	9415.58				2018	29513.7	22749.3	10723.5	12025.7
2019	30715.3	23657	10828	12828.9				2019	32701.3	25324.5	10099.7	15224.8				2019	30815.5	23629.1	10017	13612.1						2019	30194.4	23256.8	10761.1	12495.8				2019	32064.7	24699.1	10257	14442.1				2019	30240.7	23181.7	10010.4	13171.2
2020	32023.8	24717.8	11486.4	13231.4				2020	28431.7	21583.3	10446.5	11136.8				2020	30619.8	23651.1	11026.5	12624.6						2020	30411.5	23559.2	10817.4	12741.7				2020	27256.2	20866.7	9708.53	11158.1				2020	29845.8	23097.5	10681.1	12416.3
2021	27253.4	20823.8	9804.25	11019.5				2021	28876.9	22350.7	9928.22	12422.5				2021	31278.9	23913.7	10129.5	13784.2						2021	25581.6	19607.8	9440.59	10167.2				2021	27630.9	21432.9	9819.78	11613.1				2021	28301.3	21445.9	9935.22	11510.7
2022	28368	21995.9	10484.8	11511.1				2022	29410.5	22562.4	10454.3	12108.1				2022	29711.2	22759.9	9581.48	13178.5						2022	28187.1	21817.1	10288.6	11528.4				2022	27155.7	20941.5	9893.77	11047.7				2022	30507.1	23348.9	10097.8	13251.1
2023	29410.8	22770	10581.7	12188.4				2023	26451.3	20104.8	9882.42	10222.4				2023	28261.8	21628.5	10372.7	11255.7						2023	29248.7	22573.4	10588.4	11985				2023	25375.9	19360.7	9630.47	9730.21				2023	27976.3	21353.3	10102.5	11250.9
2024	27516.7	21367	10548.1	10818.9				2024	29815.4	23094.2	10914.8	12179.4				2024	30797.4	23613.5	10013.1	13600.4						2024	26864.5	20605.5	10601.3	10004.2				2024	29244.1	22668.3	10680.5	11987.8				2024	28831.5	22181.6	10322.2	11859.3
2025	29778	22845.4	10540.9	12304.5				2025	26519.7	20278.6	9004.88	11273.7				2025	30830.7	23605.4	10375.5	13229.9						2025	28023.9	21530.2	9858.25	11672				2025	25194.1	19013.3	8832.03	10181.3				2025	28872.3	22141.1	10054	12087.1
2026	27418.4	20953.9	10061.7	10892.2				2026	30587.7	23760.3	11509.4	12250.9				2026	30013.2	23315.3	11743.7	11571.6						2026	26899	20480.6	9957.19	10523.4				2026	29459.3	22797.1	11144	11653.1				2026	28958.4	22155.1	11158.4	10996.7
2027	27373.5	21178.3	10102.6	11075.7				2027	30097.9	23209.8	10078	13131.8				2027	30001.2	22881.5	11053.7	11827.8						2027	26057.4	19979.9	9698.05	10281.9				2027	27468.1	21075	9639.97	11435				2027	28667.3	22222.8	10211.5	12011.3
2028	27804.5	21622.1	10578.4	11043.7				2028	30900.9	23828	11254.9	12573				2028	31634.1	24458.8	11735.5	12723.3						2028	26751.2	20572.7	10030.9	10541.8				2028	30531.5	23638.2	10498.7	13139.5				2028	30508.3	23559.6	11376.3	12183.3
2029	28707.9	21896.2	10329.3	11566.9				2029	26707.2	20442.1	9903.21	10538.9				2029	32992.6	25453.1	11541.8	13911.2						2029	27534	20954.9	9827.62	11127.2				2029	26280.6	20276.8	9799.54	10477.3				2029	31171.9	23958.5	11023.1	12935.4
2030	26129.1	20272.4	10405.3	9867.07				2030	27966.7	21586.4	10357.9	11228.5				2030	31418.5	24228.6	10727.1	13501.5						2030	26088.8	20046	10056.2	9989.84				2030	28351.2	22018.9	10486.9	11532				2030	29860.9	22958.8	10093.4	12865.4
2031	29012.9	22318	10020.1	12298				2031	26549.7	20004.3	9523.3	10481				2031	28376	21561	10226.6	11334.4						2031	27646.9	21177.7	9881.48	11296.2				2031	26881.8	20459.6	9363.97	11095.6				2031	27586.4	20967.3	10173.5	10793.8
2032	28408.4	21737.5	10029.8	11707.7				2032	25003	18956.5	9444.68	9511.8				2032	29072.4	22603.1	11534.5	11068.6						2032	27031.4	20801.4	10001.7	10799.7				2032	25815.7	19619.7	9869.74	9749.98				2032	28384.6	22118.8	11350.9	10767.9
2033	25538.5	19328.1	9577.6	9750.48				2033	28855.2	22114.8	10246.3	11868.6				2033	32553.7	25285.1	12613.5	12671.6						2033	25285.9	19163.3	9457.34	9706				2033	28415.9	21802.5	10521.1	11281.4				2033	31093.9	24297.6	11844	12453.5
2034	27712.1	21312.1	10304.3	11007.7				2034	27493.4	21008.1	10351.5	10656.6				2034	31141.3	23802.5	10423.5	13379						2034	27882.6	21488.5	10467	11021.5				2034	25395.6	19367.5	9530.02	9837.46				2034	29746.1	22849.9	10351.1	12498.9
2035	29267.1	22362.5	10911.9	11450.6				2035	26065.7	20036.2	9923.22	10112.9				2035	30576.3	23368.9	10661.3	12707.5						2035	28244.7	21755.6	10432.7	11322.9				2035	25644.7	19669.1	9448.49	10220.6				2035	28883	22253.4	10103.3	12150.1
2036	28274.2	21597.2	10367.5	11229.6				2036	29913	23160.1	10678.5	12481.6				2036	30910.1	23865	11292.6	12572.5						2036	28104.3	21322.5	10314	11008.5				2036	27469	21353.5	10016.5	11337				2036	29266	22376.3	11097.1	11279.2
2037	28546.8	21679	10646.8	11032.2				2037	24182.8	18424.9	9711.34	8713.56				2037	33547.4	25925.3	11873.1	14052.2						2037	28235.1	21692.3	10845.3	10847				2037	23475.6	17851	9388.13	8462.89				2037	32666.1	25116.4	11659.7	13456.7
2038	27051.2	20696.8	9418.6	11278.2				2038	27327	20668	10074.5	10593.5				2038	29296.5	22709.2	10583.6	12125.6						2038	25988.1	19674.6	9158.22	10516.4				2038	26360.9	19954.9	9779.89	10175				2038	28558.2	22122.1	10271.3	11850.8
2039	27169.5	20713.3	9548.87	11164.5				2039	29834.8	23025.5	10563	12462.5				2039	28963.9	22370	10946.2	11423.8						2039	27323.1	20934.7	9799.57	11135.1				2039	28662.3	21961.1	10316.5	11644.6				2039	27337.1	21216.7	10425.3	10791.4
2040	26590.9	20331.4	9859.19	10472.3				2040	27980.8	21416.9	10096	11320.9				2040	30728	23702.2	11169.8	12532.4						2040	25843.2	19724.8	9542.72	10182				2040	28361.5	21791.7	10324.2	11467.5				2040	28914.2	22414.8	11043.8	11371
2041	26871.3	20521.7	10218.7	10303				2041	26395.6	20092.6	9778.14	10314.5				2041	30050.6	23387.8	10342.9	13044.9						2041	26547.1	20303.9	10263.6	10040.2				2041	25388.5	19259.7	9306.99	9952.74				2041	28848.1	22334.2	10179.5	12154.7
2042	30364.1	23546.6	11418.9	12127.7				2042	25302.6	19316.3	9668.42	9647.83				2042	31814	24756.1	12002	12754.1						2042	29951.9	23272.1	11189.2	12082.9				2042	24765.4	18924.2	9304.55	9619.68				2042	30276.1	23493.6	11559.1	11934.5
2043	26468.3	20385	9901.23	10483.7				2043	27337.5	20766.5	9728.12	11038.4				2043	30132.1	23076.7	10640.5	12436.2						2043	25178	19486.2	9552.91	9933.27				2043	27623.4	21032.7	9863.24	11169.4				2043	29051.2	22327.4	10191.8	12135.6
2044	30133.1	23081.6	10911.8	12169.8				2044	27589.2	21063.6	11008	10055.6				2044	31328.8	24021.3	10534.2	13487.1						2044	30385.6	23392.2	10795.5	12596.7				2044	25763.6	19693.6	10286.2	9407.37				2044	30035	22933.6	10178.4	12755.2
2045	31287.8	24153.1	11766.1	12387				2045	30878.7	23903.9	11588.3	12315.6				2045	27906.5	21491.3	10868.5	10622.9						2045	30109.2	23323.4	11644.3	11679.2				2045	30104.6	23250.9	11527	11723.9				2045	28163.1	21821.4	9937.86	11883.5
2046	29532	22815.3	10755.4	12059.9				2046	28457.7	21786.1	10644.9	11141.2				2046	31241.5	23762.9	10784.5	12978.5						2046	29177.7	22607.1	10858.7	11748.4				2046	27810.4	21324.7	10619.6	10705.1				2046	31209	23794.7	10300.9	13493.8
2047	28294.8	21464.9	9952.86	11512				2047	25324.6	19302.9	10098.4	9204.53				2047	29969.1	22973	11254.6	11718.4						2047	27839.8	20913.8	9923.43	10990.4				2047	25619.9	19567.1	10016	9551.1				2047	28172.4	21692.9	10434.7	11258.1
2048	28326.1	21700.2	11117.1	10583.2				2048	25879.9	19965.8	9913.46	10052.4				2048	27168.4	20830.2	8708.24	12122						2048	27964.7	21425.4	10869.1	10556.3				2048	24993	19108.9	9618.41	9490.54				2048	26369.1	20068.3	10166	9902.31
2049	27913.8	21311.2	9817.19	11494				2049	28062.8	21331.8	10563.6	10768.2				2049	30974.5	23899.7	11308.2	12591.5						2049	27139.5	20697.3	9418.89	11278.4				2049	27116	20801.4	10296.6	10504.7				2049	29757	22902.6	11043.4	11859.2
2050	27397.8	20634.8	9734.65	10900.2				2050	26650.7	20308.6	10143.6	10165				2050	33459.4	25871.5	11404.8	14466.6						2050	26672.5	20219.7	9795.01	10424.7				2050	27148.2	20651.3	9740.76	10910.6				2050	32928.3	25427.4	11197.1	14230.3
2051	29904.4	22887.7	10943.5	11944.2				2051	27755.4	21295.2	10076.7	11218.5				2051	30504.5	23298.4	10286.5	13011.9						2051	29672.9	22901.9	10579.6	12322.3				2051	27391.4	20906.4	10140.6	10765.8				2051	29809.9	22878.1	10405.2	12473
2052	26387.6	20108.7	9778.6	10330.1				2052	27448.3	20779.5	10413.6	10365.8				2052	32183.4	24928.7	11679.7	13249						2052	26088.8	19973.5	9508.01	10465.5				2052	26886.9	20433.9	10333.4	10100.5				2052	31006.5	23609.9	11493	12116.9
2053	26722.1	20346.9	9935.52	10411.3				2053	27778.4	21016.1	10501.8	10514.3				2053	32215.7	24925.9	11453.4	13472.5						2053	25157.1	19194.9	9339.43	9855.5				2053	26567.8	20288.8	9864.33	10424.5				2053	30403.4	23445.1	10910	12535.2
2054	26921.1	20382.7	10130.4	10252.3				2054	27272.8	20650.2	10316.3	10333.9				2054	31977.2	24807.8	11003.6	13804.2						2054	25170.5	19105	9590.04	9515				2054	26027.8	19848	10160.3	9687.77				2054	31509.7	24428.6	11022.7	13405.9
2055	29823.1	22552.2	10955.6	11596.5				2055	27065	20408.2	10035.6	10372.6				2055	30544	23353.9	10109.1	13244.8						2055	28924.2	22024.7	10553.2	11471.5				2055	25709	19587.2	9911.05	9676.17				2055	31050.3	23775.7	10601.8	13173.9
2056	27676.2	21007.9	10781.2	10226.8				2056	28130.5	21560.1	10846.5	10713.6				2056	32944.2	25683.9	12243.1	13440.8						2056	27188.1	20767.9	10601.2	10166.7				2056	27418.1	20980.6	10176.9	10803.8				2056	31061.8	24083.7	11400.3	12683.4
2057	29615.6	22952.5	11186.7	11765.8				2057	28617.1	22073.3	10952.2	11121				2057	29900	23368.9	11416.3	11952.6						2057	28899.7	22431.9	10853.7	11578.2				2057	29018.2	22538.8	11149.4	11389.4				2057	29287.1	22773.1	10752	12021.1
2058	27411.5	20855.5	10875.2	9980.34				2058	27231	20967.4	10706.4	10261				2058	32028.2	24614.9	11089.1	13525.8						2058	26545.2	20201.4	10262	9939.39				2058	26245.8	20083.7	10123.6	9960.09				2058	30865.8	23803.9	10681.7	13122.2
2059	27401.6	21052.6	10596.9	10455.6				2059	23347.7	17855.7	9341.75	8513.96				2059	32970.4	25102.7	12623.7	12479.1						2059	26564.6	20304.3	10045.2	10259.1				2059	22802.3	17548.8	9306.38	8242.39				2059	31469	24240.8	12251.7	11989
2060	26736.6	20122.7	9718.62	10404.1				2060	24094.2	18071.7	9131.4	8940.33				2060	32233.2	24492.5	11495	12997.5						2060	26618.8	20095.3	9877.27	10218.1				2060	22109.4	16618.4	8430.13	8188.23				2060	30180.2	22858.6	11371	11487.7
2061	27668	21134.8	10597.5	10537.4				2061	24227	18499.1	9953.61	8545.46				2061	30455.1	23398.7	10691	12707.7						2061	27010	20571.5	10530.9	10040.6				2061	24068.4	18370.8	9911.21	8459.54				2061	28413	21830.2	10426	11404.3
2062	26080	19944.1	9657.85	10286.3				2062	22875.7	17346.4	8978.68	8367.76				2062	31624.7	24513.5	11824.5	12689						2062	25115.3	19354.5	9092.41	10262.1				2062	22465.7	17130.6	8933.1	8197.5				2062	30199.2	23269.3	11488.7	11780.6
2063	26830.8	20472.8	10287.9	10184.9				2063	26208.9	19762.1	9683.64	10078.5				2063	32252.7	24584.2	11757.3	12827						2063	25875.1	19706.2	9742.32	9963.86				2063	24636.4	18671.4	9190.32	9481.11				2063	30862.7	23595.3	11492.7	12102.6
2064	25818.8	19640.9	9073.88	10567				2064	28898.1	22052.9	11008.7	11044.2				2064	30995.7	24017.4	11267.2	12750.2						2064	24774.9	18951.1	9349.31	9601.74				2064	28022.7	21482.6	10741.8	10740.8				2064	30881.4	23923.7	11420.7	12503
2065	26321.9	20019.1	9599.9	10419.2				2065	26455.9	20135.9	10463.9	9672.07				2065	31679.1	24424.8	11358.7	13066.1						2065	26001.3	19817.8	9624.77	10193				2065	26584.2	20356.3	10689.2	9667.11				2065	29991.9	23220.7	10930.7	12290
2066	27427.4	20968.5	10369	10599.6				2066	26745	20202.5	9775.94	10426.5				2066	31898.4	24064.8	11342.8	12722						2066	26597	20592.8	10008.4	10584.4				2066	25889.4	19524.7	9851.91	9672.82				2066	30719.4	23344.5	10944.2	12400.3
2067	28063.2	21345.2	10338.4	11006.8				2067	27291.9	20879.2	10242.2	10637.1				2067	33164.1	25422.2	10995.5	14426.8						2067	27693.5	21120.4	10086.8	11033.6				2067	26607.9	20366.4	9725.3	10641.1				2067	31538.3	24112.7	10795.3	13317.4
2068	26713.8	20108	9680.5	10427.5				2068	28316.7	21598.5	11073.2	10525.3				2068	30398.1	23654.3	11666.1	11988.2						2068	26929	20668.7	9915.96	10752.7				2068	26744.9	20360.4	10300.2	10060.3				2068	29784.8	22889.5	11226.3	11663.2
2069	30292.7	23061.8	11314.3	11747.4				2069	24004.9	18220.7	9362.4	8858.28				2069	34474.6	26477.3	12230	14247.3						2069	29878.1	22796	11066.1	11729.9				2069	23737.9	18170.5	9350.83	8819.71				2069	30888	23968.1	11338.6	12629.5
2070	27110.9	20492.3	10071	10421.3				2070	25743.6	19712.1	10338.2	9373.92				2070	32441.3	24960.6	11897.3	13063.3						2070	26330	19899.4	9947.28	9952.12				2070	26121.3	20072.4	10355.8	9716.64				2070	30571.2	23562.8	11362.4	12200.4
2071	25874.7	19708	9686.93	10021				2071	24253.1	18633.9	9558.13	9075.81				2071	33876.9	25999.3	11074.3	14924.9						2071	23801.1	18239.4	8935.6	9303.81				2071	23794.9	18175	9675.74	8499.27				2071	32642.4	25008.2	11059.7	13948.5
2072	25867.4	19622.3	9595.7	10026.6				2072	26497.5	20176.1	10322.1	9853.99				2072	35112.6	27104.8	12582.1	14522.7						2072	26086	19864.8	9596.02	10268.8				2072	26788.9	20481	10365.6	10115.5				2072	33619.3	25877.4	12285.4	13592
2073	25559	19342.9	9762.18	9580.69				2073	24517.8	18750.8	9530.16	9220.67				2073	30676.1	23697.1	11024.5	12672.7						2073	25117.3	19179.4	9599.18	9580.24				2073	23824	18121.2	9553.12	8568.05				2073	29687.9	22619.7	10626.7	11993
2074	25531.8	19739.8	9785.46	9954.36				2074	24587.2	18672.7	9107.23	9565.51				2074	29172.3	22391.5	11083.5	11307.9						2074	25863.2	19862	9938.04	9923.99				2074	23627	17880.2	8705.02	9175.18				2074	28886.4	22402.9	11033.1	11369.9
2075	26869.2	20445.3	10409.8	10035.5				2075	23070.9	17705.1	9446.05	8259.02				2075	33803.7	26101.7	11837.8	14263.9						2075	27574.9	20996	10464.9	10531				2075	24548.2	18892.6	10073.6	8818.96				2075	34570.8	26749.9	12031.4	14718.6
2076	25938	19857.5	10100	9757.56				2076	28231.7	21611.5	11077.3	10534.2				2076	31035.4	23701.5	10996.4	12705.1						2076	26240.6	20052.9	10223.7	9829.13				2076	26643.7	20332.9	10678.6	9654.37				2076	29788.2	22443.9	10486.8	11957.1
2077	25747.4	19930.7	9655.16	10275.6				2077	26266.3	19950.7	10043.2	9907.51				2077	33272.8	25618.2	11691.7	13926.5						2077	25692.7	19804.4	9586.64	10217.7				2077	25947	19816.7	9854.2	9962.5				2077	32099	24801.6	11606.4	13195.2
2078	27307.5	20745.6	10577.3	10168.3				2078	27348.5	20855	10449.6	10405.3				2078	32247.8	24852.6	11441.7	13411						2078	26889.1	20457.1	10137.4	10319.7				2078	26890.1	20493.1	10007.3	10485.8				2078	30274.2	23171.2	10580	12591.2
2079	26184.9	19975.5	10052.2	9923.37				2079	26260.8	20039.7	10031	10008.7				2079	30493.4	23516.9	11037.5	12479.3						2079	27108.4	20705.7	10507.8	10197.9				2079	25152.5	19203.1	9460.86	9742.2				2079	28830	22311.4	10464.7	11846.7
2080	28795.1	22140.3	10954.7	11185.6				2080	28171.3	21521.5	11558.3	9963.26				2080	30780.7	23437.6	11435	12002.5						2080	28243.2	21757.6	10848.1	10909.5				2080	26277.4	20304	10754.6	9549.41				2080	28618.9	22107.6	10837.4	11270.3
2081	27533.4	20981.9	10470.9	10511				2081	25846.3	19768	10729.9	9038.05				2081	33048.2	25428	11592.2	13835.8						2081	26765	20349.3	10155.4	10193.8				2081	25696.1	19691.1	10405.4	9285.69				2081	30686.1	23680	10967	12713.1
2082	25537.8	19646.4	9502.43	10144				2082	26947.7	20631.6	10810.1	9821.47				2082	31586	24348.2	12063	12285.1						2082	24808.8	19006.7	9356.16	9650.56				2082	25498.8	19719.9	10458	9261.9				2082	29809.5	23082.3	11428.2	11654.1
2083	26391.4	20099.8	9516	10583.8				2083	25476.7	19343.6	9822.99	9520.56				2083	26836.7	20290.3	10035.2	10255.1						2083	26581.2	20189.7	9600.05	10589.6				2083	24450.1	18678.3	9165.23	9513.1				2083	26751	20324.4	10116.2	10208.3
2084	28051.7	21364.7	10557.7	10807				2084	25757.5	19495.6	10115.9	9379.73				2084	31992.4	24404.1	11051.5	13352.6						2084	26710.2	20279.3	10182	10097.4				2084	25643	19431.3	9933.74	9497.58				2084	31197.1	23939.2	10959.4	12979.8
2085	25975.5	19744.7	9829.99	9914.7				2085	27045.5	20770.9	11120.4	9650.53				2085	30858.8	23360.3	10966.1	12394.2						2085	24452	18700.7	9227.85	9472.87				2085	27289	20926.5	10834.9	10091.6				2085	29205.6	22050.7	10773.3	11277.4
2086	27330.6	20924.1	10054.1	10870				2086	27919.6	21347.8	10400.2	10947.6				2086	30718.2	23634.8	10670.8	12964						2086	27133.7	20626.2	10018.2	10607.9				2086	26864.4	20406	9924.88	10481.1				2086	28442.4	21969.5	10219.3	11750.2
2087	29309.1	22242.3	11078.2	11164.1				2087	25321.3	19470	10340.1	9129.9				2087	26757.1	20125.7	9163.64	10962.1						2087	29032.9	21998.5	10919.4	11079.1				2087	24907.7	19070.6	9945.11	9125.5				2087	26293.5	19858.3	8078.49	11779.8
2088	27876.6	21179.6	10213	10966.6				2088	23178	17709.1	7143.41	10565.7				2088	34229.5	26246.2	11323.1	14923.1						2088	27120.9	20879.3	10024.7	10854.6				2088	22722.6	17301.9	8686.44	8615.48				2088	32578.3	24939.4	10807.8	14131.7
2089	26818.9	20290.5	9813.18	10477.4				2089	26049	19843.6	10454.6	9389				2089	33195.5	25655.4	12392.2	13263.2						2089	26607.3	20105.3	9552.12	10553.2				2089	26559.6	20275.7	10397.6	9878.05				2089	30672.2	23435.4	11460.1	11975.3
2090	29944	23085.5	11518.9	11566.6				2090	25178.4	19070.9	8596.22	10474.7				2090	31169.7	23529	11160.2	12368.7						2090	29291.9	22644.6	11358.7	11285.9				2090	27024.8	20482	9913.6	10568.4				2090	29397.1	22140	10916.9	11223.1
2091	25695.7	19905.8	9649.98	10255.8				2091	25025.4	19042.1	9747.88	9294.22				2091	32942.1	25596.6	12487	13109.6						2091	26102.4	20317.8	9999.72	10318.1				2091	23415.7	17736.1	9614.16	8121.9				2091	31930.6	24716.6	11754.4	12962.2
2092	26881.2	20550	10027.4	10522.6				2092	24762.7	19031.5	10112.4	8919.11				2092	30276.7	23265.1	12043.9	11221.2						2092	26063.7	19952.5	9750.37	10202.1				2092	23855.6	18287.4	9333.97	8953.43				2092	29636.2	22594.8	11473.1	11121.7
2093	27072.4	20786.6	10059.2	10727.4				2093	25244.9	19273.5	9780.26	9493.24				2093	33118.9	25461.1	12131.8	13329.3						2093	26902.7	20824.3	9749.16	11075.1				2093	25219.9	19128.6	9891.13	9237.48				2093	32414.6	25019.7	11994.5	13025.2
2094	29377.5	22316.9	11599.5	10717.4				2094	28830.1	22027.3	10060.9	11966.5				2094	34370.7	26340	12130	14210						2094	28909.6	21962.4	11285.5	10676.9				2094	28738.4	21953.8	10030.4	11923.4				2094	32210	24742.5	11514.5	13228
2095	27118.3	20673.8	10499.3	10174.5				2095	27281.5	21314.4	11032.2	10282.2				2095	31961.6	24482.3	10781.9	13700.4						2095	26893.3	20578.4	10353.3	10225.1				2095	26593.5	20489.4	10799.9	9689.45				2095	28941.5	21909.5	10359.2	11550.3
2096	28559.8	21814.5	10699.6	11114.9				2096	26903.2	20381.3	10234.4	10146.8				2096	31087.4	23999.5	12108.9	11890.5						2096	27487	21301.4	10592.8	10708.6				2096	24554.1	18626.2	9775.24	8850.98				2096	29774.7	23057.8	11646.6	11411.2
2097	29073.3	22304.9	11067.2	11237.6				2097	25674.2	19701.4	10237.2	9464.21				2097	31631.4	24344.9	12151.2	12193.6						2097	28393.2	21716	11121.9	10594.1				2097	25014.2	19257.1	9682.84	9574.31				2097	32007.9	24727.8	12552.5	12175.4
2098	26633.7	20152.4	10242.4	9910.07				2098	24016.2	18381.6	9582.95	8798.65				2098	30485.9	23429	10539.2	12889.8						2098	25849.6	19888.4	10064.5	9823.85				2098	21665.3	16656	8847.64	7808.37				2098	30360.2	23219.2	10499.9	12719.3
2099	27284.7	20661	10184	10477				2099	27003.4	20628.1	10087.9	10540.2				2099	34384.3	26567.9	12698.4	13869.5						2099	26587.8	20186.3	10245.2	9941.14				2099	25960.2	19911	9585.27	10325.7				2099	30996.5	23525.2	11530.3	11994.9
2100	27378.1	20934.3	10215.6	10718.7				2100	27087.5	20797.6	10207.7	10589.9				2100	31374.1	24294	11568.2	12725.8						2100	26728.3	20502.5	9996.45	10506				2100	25711	19648.3	10037.8	9610.5				2100	30326.9	23501.3	11411.7	12089.6

## Sheet: RCP 6.0
Zhongwei station																										Yongning station
MIROC5								IPSL-CM5A-MR								GFDL-ESM2G										MIROC5								IPSL-CM5A-MR								GFDL-ESM2G
Year	Photosynthetic production (kg/ha)	Aboveground biomass (kg/ha)	ear (kg/ha)	leaf+stem (kg/ha)				Year	Photosynthetic production (kg/ha)	Aboveground biomass (kg/ha)	ear (kg/ha)	leaf+stem (kg/ha)				Year	Photosynthetic production (kg/ha)	Aboveground biomass (kg/ha)	ear (kg/ha)	leaf+stem (kg/ha)						Year	Photosynthetic production (kg/ha)	Aboveground biomass (kg/ha)	ear (kg/ha)	leaf+stem (kg/ha)				Year	Photosynthetic production (kg/ha)	Aboveground biomass (kg/ha)	ear (kg/ha)	leaf+stem (kg/ha)				Year	Photosynthetic production (kg/ha)	Aboveground biomass (kg/ha)	ear (kg/ha)	leaf+stem (kg/ha)
2006	29892.6	23147.8	10461.2	12686.6				2006	29370.8	22595.6	10203.7	12392				2006	28349.2	21817.3	10539.2	11278.1						2006	28843.8	22203.6	10249.6	11954				2006	28795.4	22185.6	10453.2	11732.4				2006	27745	21381.4	10423.7	10957.7
2007	29099.6	22418.1	10301	12117.1				2007	29677.1	22799	10038.2	12760.8				2007	32406.2	25013.4	10226	14787.3						2007	27572.4	21233.1	9857.04	11376.1				2007	29978.4	22961.8	9879.84	13082				2007	31822.9	24709.6	10061.5	14648.1
2008	32173.9	24574.3	11033.5	13540.9				2008	33566.1	25829	10733.6	15095.4				2008	30476.6	23568.3	10960.1	12608.2						2008	31138.8	23877.5	10624.4	13253.1				2008	32999.2	25456.9	10929.4	14527.4				2008	30893.7	23853.8	10842	13011.9
2009	28884.6	22124	10675.9	11448				2009	27809.8	21185.3	9677.34	11508				2009	30609.7	23297.7	10559.9	12737.8						2009	27350.4	21168.3	10409.5	10758.8				2009	27749.7	21155.5	9858.05	11297.4				2009	30256.6	23051.4	10475	12576.4
2010	32254	25082	9802.3	15279.7				2010	31104.1	24074.2	11358.6	12715.6				2010	29906.1	23043.4	10639.9	12403.5						2010	30387.5	23748.4	9301.58	14446.8				2010	30200.3	23273.7	11018.8	12254.9				2010	29055	22369.5	10280.3	12089.2
2011	30206.3	23430.7	10939.8	12490.9				2011	26708.6	20366.5	9617.58	10748.9				2011	31559.2	24173.3	10377.3	13796						2011	29140.2	22592.2	10666.8	11925.4				2011	26401.4	19961.7	9723.92	10237.8				2011	29881.3	22870.6	9941.28	12929.3
2012	29132.6	22452.2	10593.5	11858.7				2012	26593.3	20574.3	9583.53	10990.8				2012	29093.3	22348.4	10565.8	11782.6						2012	27658.9	21381.6	10375.2	11006.4				2012	25340.4	19488.4	9060.06	10428.4				2012	28480.1	21961.8	10587.1	11374.7
2013	29689.3	22904.4	10602	12302.5				2013	30597.1	23596.3	10143.5	13452.8				2013	30913.1	23624.2	10887	12737.2						2013	28082.9	21654.2	10768.7	10885.5				2013	29574.3	22753.3	9932.44	12820.9				2013	30430.8	23305.9	10930.3	12375.6
2014	28670.9	21881.5	10071.4	11810.1				2014	28901.5	22337.5	10252.8	12084.7				2014	31239.4	24378.9	11034.4	13344.5						2014	27271	20892.2	9684.93	11207.3				2014	28556.2	22099.8	10301.3	11798.5				2014	31317.2	24373.6	11161.1	13212.5
2015	33500.9	25639.8	10804.4	14835.5				2015	27728.1	21276.6	9454.77	11821.8				2015	27517.9	21081.4	10687.6	10393.8						2015	33063	25336.2	10713.6	14622.5				2015	25721.3	19815.3	8876.84	10938.4				2015	27400.5	20996.2	10487.5	10508.7
2016	32765.2	24939.9	10609.9	14329.9				2016	28709.2	22068.7	10175	11893.6				2016	30860	23955.7	11174.6	12781.1						2016	32111.6	24513.9	10480.9	14032.9				2016	28413.5	21898.4	9960.38	11938				2016	30285.6	23419.4	11089.9	12329.4
2017	28737.3	22107.9	10706.8	11401.2				2017	34263.5	26447.9	11156.3	15291.6				2017	30396.7	23380.3	10503.2	12877.1						2017	27517.7	20817.8	10288.5	10529.3				2017	32689.1	25097.7	10838.3	14259.3				2017	30353.7	23348.6	10389.9	12958.7
2018	30660	23657.2	10586.1	13071.1				2018	26778.7	20378.1	9435.66	10942.4				2018	29659.8	22851.7	11301.9	11549.8						2018	29751.4	22985.7	10322.5	12663.2				2018	27329.6	20927.7	9389.8	11537.9				2018	28869.4	22249.6	11075.9	11173.7
2019	27536.4	21164.3	9923.27	11241				2019	31225.5	24140.2	11434.7	12705.5				2019	30034.4	22913.3	9015.59	13897.8						2019	26903.2	20603.8	9608.87	10995				2019	29968.5	23136.9	10881.6	12255.3				2019	29256.4	22991.3	8510.2	14481.1
2020	30481.3	23481.1	10373	13108.1				2020	29823.2	22938.6	10690.5	12248.1				2020	31586.8	24214.1	10654.1	13560						2020	28848	22305.5	10069.7	12235.8				2020	28036.5	21562.2	9769.91	11792.3				2020	30557.2	23374.9	10500.6	12874.3
2021	26788	20583.5	9321.64	11261.9				2021	29323.2	22561	10877.3	11683.7				2021	28851.3	22160.9	10872.7	11288.2						2021	26261.4	20142	9442.35	10699.6				2021	29921.4	22923.4	10972	11951.4				2021	27960.2	21556.8	10811	10745.7
2022	29916.6	22972.7	10511.1	12461.6				2022	26568.6	20340.4	9699.35	10641				2022	28270.5	21541	10372.4	11168.6						2022	27973.3	21367.7	9715.93	11651.8				2022	26712.3	20364.3	9589.85	10774.5				2022	28022	21352	10525.4	10826.6
2023	25795.2	19478.3	9040.01	10438.3				2023	28744	22195.8	10430.4	11765.4				2023	27286.3	20953.9	9448.43	11505.4						2023	25565.6	19272.7	9171.56	10101.2				2023	29344	22649.5	10829.2	11820.3				2023	26726.5	20581	9358.53	11222.5
2024	28008.7	21607.8	10105.6	11502.2				2024	27569.7	21248.9	10533.7	10715.2				2024	30479.8	23433.4	11239.1	12194.3						2024	27320.2	20967.5	10001.6	10966				2024	27108.8	20901.5	10278.2	10623.4				2024	29398.3	22707.6	10980.2	11727.4
2025	29467.2	22591.9	10396.7	12195.3				2025	29621.2	22762.4	10706.4	12056				2025	27661.9	21323.5	9929.71	11393.8						2025	27766.6	21318.3	9872.27	11446				2025	27157.3	20897	10036.1	10860.9				2025	28026.7	21804.4	10101.2	11703.2
2026	30187	23303.1	10766.8	12536.2				2026	27803.2	21204.6	10277.7	10926.9				2026	27799.7	21297	9735.32	11561.7						2026	28794.9	22198.9	10279.4	11919.5				2026	26897.8	20710.2	10116.4	10593.8				2026	26876.2	20576.3	9775.33	10800.9
2027	28716.7	21894.6	9608.28	12286.3				2027	28373.3	21763.5	10213.1	11550.4				2027	29623.2	22903.5	11064.1	11839.4						2027	26966.1	20315.4	9409.49	10905.9				2027	27091.8	20562.7	10115.8	10446.9				2027	30245.2	23362.7	10930.3	12432.4
2028	26970.5	20461	9953.12	10507.9				2028	27473.7	21179.3	9780.27	11399				2028	34035.5	26071.3	11013.6	15057.7						2028	26578.5	20215.5	9923.48	10292				2028	27475.7	21279	9940.08	11338.9				2028	33133.4	25462.5	10620.2	14842.3
2029	28829.5	22082.6	10390.7	11691.9				2029	29895.4	23053.6	10517.4	12536.2				2029	32666.7	25244.6	11670.6	13574						2029	28411.4	21891.6	10482.9	11408.7				2029	29532	22632.9	10412.3	12220.6				2029	31643.2	24551.7	11305.3	13246.4
2030	30867.3	23903.7	10647.8	13256				2030	29619.3	22902	10703.4	12198.6				2030	26396.5	20578.9	10002.6	10576.3						2030	30487.3	23621.8	10985.5	12636.3				2030	28992.8	22363.3	10375.7	11987.7				2030	26609.7	20741.8	10172.1	10569.7
2031	31010.8	23807.1	10421.9	13385.2				2031	29755	23083.4	10734.4	12349				2031	32683.4	25167.5	10626.3	14541.2						2031	30744.8	23646.5	10516.6	13129.9				2031	29240.2	22740.9	10379	12361.9				2031	32243.9	24795.1	10308	14487.1
2032	26720.6	20384	9729.08	10655				2032	26251.5	19920.2	9280.67	10639.5				2032	31643.6	24377.4	10472.7	13904.6						2032	26052.4	19728	9618.36	10109.6				2032	25920.1	19578.1	9185.11	10393				2032	31715.7	24370.1	10636.4	13733.7
2033	27608.8	21425.5	10474.3	10951.2				2033	29775	22791.1	10807	11984.1				2033	31676.9	24345.7	11179.1	13166.6						2033	26808	20628.5	10284.2	10344.3				2033	30132.7	23024	10751.1	12272.9				2033	31199.2	23876.8	11030.3	12846.5
2034	28653.8	22005.5	9830.67	12174.8				2034	26686.3	20300.9	10172.1	10128.7				2034	30839.7	23834	10439.2	13394.8						2034	27610.6	21209.1	9692.05	11517				2034	27118.8	20623.5	10468	10155.5				2034	30670.7	23707.5	10460.4	13247.1
2035	29671.3	22838.6	10533.6	12305				2035	28130.5	21257.9	10527.5	10730.4				2035	29936	23024.1	10477.6	12546.5						2035	28406.8	21950.9	10178	11772.9				2035	27795.2	21014.9	10474.1	10540.8				2035	29478.2	22690.6	10440	12250.6
2036	28340.9	21735.8	9955.61	11780.2				2036	28968	21951.6	10333.1	11618.5				2036	31191.4	24013.8	11703.4	12310.4						2036	27878.8	21220.3	9904.2	11316.1				2036	29106.1	22261.3	10535.3	11726				2036	29797.3	22607.3	11133.5	11473.7
2037	28403.7	21754.6	8380.97	13373.6				2037	26144	20052.3	9423.32	10629				2037	30045.5	22950.2	11164.3	11785.9						2037	27760.9	21437.3	9710.13	11727.1				2037	26352.4	19929.2	9537.04	10392.2				2037	29923.1	22842.3	11034.9	11807.4
2038	28807.8	22326.7	10836.7	11490				2038	28815.4	22336.9	11132.8	11204.1				2038	31316.6	24129	10490.4	13638.7						2038	29031.4	22443.5	10687.4	11756.1				2038	28540.8	22108.5	10732.3	11376.2				2038	29984	23094.4	10313.1	12781.4
2039	26390.3	20139.1	9481.18	10657.9				2039	28116.6	21509	10311.8	11197.1				2039	27766.7	21456.3	10213.6	11242.7						2039	25636.4	19589.9	9471.93	10118				2039	27215.9	20761.4	10040.3	10721.1				2039	26965.4	20989.4	9731.76	11257.7
2040	28710.9	21962.6	10319.7	11642.9				2040	30155.2	23197.5	10690.5	12506.9				2040	31608.9	24455.9	10952.9	13503						2040	26860.7	20774.1	10054.7	10719.4				2040	29579.7	22812	10596.6	12215.4				2040	31078.8	24230.7	10249.6	13981.1
2041	27191	20809.1	9983.51	10825.6				2041	26142.7	20115.7	9878.79	10236.9				2041	29995.9	23072.3	11101.7	11970.5						2041	26901.2	20412.6	9835.97	10576.7				2041	26094.3	20127.3	9795.75	10331.5				2041	28358.4	21938.2	10481.5	11456.8
2042	29446.5	22632.4	10561.2	12071.1				2042	25069.3	19354.3	9735.9	9618.44				2042	31286.1	24004.4	10401.7	13602.8						2042	28584.4	21972.5	9977.84	11994.6				2042	24461.6	18693.5	9447.87	9245.66				2042	30359.5	23248.7	10649.5	12599.2
2043	28060.3	21495.2	10099	11396.1				2043	27005.4	20856.1	10314.3	10541.8				2043	32462.2	24878	11041.5	13836.5						2043	26763.4	20322.1	9609.56	10712.5				2043	25170.2	19252.1	9545.66	9706.39				2043	31350.8	23966.2	10592.4	13373.8
2044	27317.6	20986.5	10095	10891.6				2044	29559.8	22815.9	11330.6	11485.3				2044	29516.3	22881.3	10610.2	12271.1						2044	26151.8	19951.6	9951.8	9999.75				2044	28219.8	21534.6	10802.8	10731.8				2044	27756.9	21483.5	10174.4	11309.1
2045	26435.9	20209.6	9792.32	10417.3				2045	26263.3	20035.9	9901.23	10134.6				2045	31201	24069.8	10624.3	13445.6						2045	26394.9	20215.9	9983.45	10232.4				2045	26483	20417.9	9941.57	10476.4				2045	31272.2	24196.2	10661.2	13535
2046	29602.7	22639.1	10510.3	12128.8				2046	29286.5	22404.1	11014.6	11389.4				2046	28143.3	21315.9	9816.27	11499.6						2046	28263.2	21866	9994.2	11871.8				2046	28731.6	22165.2	10820.4	11344.8				2046	27573.3	20804.8	9766.38	11038.4
2047	29273	22191.1	10924.3	11266.7				2047	25528.3	19244.5	9554.21	9690.34				2047	30816.3	23640.2	11052.7	12587.4						2047	28003.4	21590.9	10637	10954				2047	25453.1	19114.8	9527.27	9587.54				2047	28922.4	22192	10409.1	11782.9
2048	28181.2	21569.4	10491.9	11077.4				2048	27413.3	20905.9	9749.2	11156.7				2048	30727.3	23839.5	10858.6	12980.9						2048	26356.4	19990	9894.55	10095.5				2048	27110.5	20742.6	9625.9	11116.7				2048	30917.6	23893.6	11248.9	12644.7
2049	27578.8	20723.2	10003.5	10719.6				2049	26803.7	20846.8	9800.37	11046.5				2049	30631.3	23747.7	11390.5	12357.2						2049	27657.1	20983.8	10236.1	10747.7				2049	25810.7	19735.4	9403.68	10331.7				2049	29774.3	23001	11015.8	11985.1
2050	28422.2	21620.9	10090.1	11530.8				2050	29987.6	22963.9	11502.4	11461.5				2050	31430	24221.6	11240	12981.6						2050	28362.2	21538.4	10204.9	11333.5				2050	27975.5	21475.9	10616	10859.9				2050	30432.8	23485	11110	12375
2051	26755.6	20237.6	9873.01	10364.6				2051	27629.4	21184.6	10382.5	10802.1				2051	30364.5	23255.8	10273.4	12982.4						2051	25790.5	19564.1	9363.31	10200.8				2051	27841.5	21361.4	10731.7	10629.7				2051	31193.4	23998.9	10383.2	13615.7
2052	28275.7	21335	10168.6	11166.4				2052	26409.9	20285.1	9883.11	10402				2052	33207.5	25569.5	11562.7	14006.9						2052	27158.7	20624.4	9615.48	11008.9				2052	25569.7	19663.3	9428.49	10234.8				2052	32325.4	24932.9	11304.2	13628.7
2053	29943.3	22961.2	11158.1	11803.1				2053	28352.3	21790.8	10803.1	10987.7				2053	34338.6	26475.5	11245.3	15230.2						2053	28781.7	22216.6	10350.3	11866.3				2053	28275.9	21642.8	10481.7	11161.1				2053	33230	25553.2	11060.8	14492.4
2054	27616.6	21101.9	10561.3	10540.7				2054	32546.7	25282.8	12248.3	13034.5				2054	25705.5	19588	9995.4	9592.57						2054	27502.3	21244.5	10371.3	10873.2				2054	30967	23968.8	11601.4	12367.4				2054	26008.4	19819.3	9965.91	9853.36
2055	28239.3	21734.6	10452.9	11281.7				2055	28566	21933	10799.1	11133.9				2055	31204.9	23961	11086.2	12874.8						2055	27673.7	21299.2	9929.57	11369.6				2055	27845.3	21293.8	10482.2	10811.6				2055	30940.3	23565.9	10985.7	12580.2
2056	27047	20394	9872.85	10521.2				2056	29449.8	22688.6	11528.7	11159.9				2056	30025	22885.9	11082.8	11803.1						2056	25812.1	19521	9384.1	10136.9				2056	28306.2	21773.6	11076.1	10697.5				2056	30072.3	23097.7	11022.7	12075
2057	28560.3	21855.2	10674.6	11180.6				2057	29758.7	23078.2	11073.8	12004.3				2057	29176.6	22678.1	10734.2	11943.9						2057	26741.5	20262.4	10117.6	10144.8				2057	28738	21936.3	10918.9	11017.4				2057	30669.7	23636	10959.3	12676.7
2058	28137.8	21526.4	10415.3	11111.1				2058	27716.5	21234.6	10888.4	10346.2				2058	29477.5	22407.2	10253.8	12153.5						2058	27482.7	21177.8	10201.2	10976.6				2058	27795.1	21293.8	10778.7	10515.1				2058	29539.6	22534.5	10088.8	12445.7
2059	28885.6	22208.2	10710.2	11498				2059	26412.9	20175.9	10749	9426.88				2059	32448.5	24945.6	12144	12801.6						2059	28867.4	22167	10691.9	11475.1				2059	26432.2	20104.2	10938.7	9165.53				2059	30550	23298.8	11534.8	11764
2060	29670.1	22645.7	10607.9	12037.8				2060	27553	20856.3	10147.2	10709.2				2060	29217.1	22308.9	11112.3	11196.6						2060	28783.5	22160.9	10521.6	11639.3				2060	28589.2	21963.5	10173.9	11789.6				2060	28759.9	22068.3	10856	11212.4
2061	31905.2	24791.9	12024.1	12767.8				2061	29310.6	22558.5	10983.8	11574.7				2061	32657.5	25038	11917.7	13120.3						2061	30337.9	23388.8	11335.6	12053.2				2061	30023.2	23280.5	11126.8	12153.7				2061	31513.5	24061.4	11727.3	12334.1
2062	29435.1	22315.4	10701.2	11614.2				2062	27758.6	21155.2	10382.4	10772.8				2062	30659.3	23531.3	11072.7	12458.6						2062	28732.4	21761.8	10661	11100.8				2062	27329.4	20822.2	10045.1	10777.2				2062	30481.3	23377.6	10895.2	12482.3
2063	22719.3	17384	8615.81	8768.15				2063	25415.9	19256.9	8925.88	10331				2063	33543.6	25496	11117	14379.1						2063	24850.6	18996.1	9283.66	9712.4				2063	26574.9	20038.9	9280.79	10758.2				2063	33407.6	25449.6	11470.8	13978.8
2064	27411.2	20929.8	9678.54	11251.2				2064	33552.3	25907.7	12741.9	13165.8				2064	34536	26680.7	12038.6	14642.1						2064	27394.2	20750.9	9784.95	10966				2064	34886.9	27039.8	13105.1	13934.7				2064	32519.5	25091.4	11431.6	13659.8
2065	25293.4	19381.8	9796.06	9585.73				2065	29259.9	22595.9	10781.5	11814.4				2065	33762	26060.5	12133.9	13926.6						2065	24443.4	18631.5	9538.56	9092.9				2065	29743.5	22662.3	10789.1	11873.2				2065	32978.8	25366.3	11970.8	13395.5
2066	28282	21508.3	10912.7	10595.6				2066	28780.8	22015.3	11121.2	10894.1				2066	31305.6	23735.1	11702.4	12032.7						2066	28915	22070	11186	10884				2066	28708.2	21721.9	10665.4	11056.5				2066	29835.7	22721.2	11213.5	11507.7
2067	28005.8	21329.1	10398.8	10930.3				2067	29990.1	23051.4	11682.6	11368.8				2067	32236.4	24724.5	11581.9	13142.6						2067	26797.8	20492.5	9601.71	10890.7				2067	29515.6	22658.6	11683.9	10974.7				2067	31924	24500	11158.6	13341.4
2068	27005	20547.7	10084.3	10463.4				2068	26337.4	19892.3	9999.23	9893.09				2068	30203.2	23496.4	11481	12015.4						2068	26889.5	20470.9	9773.11	10697.8				2068	27065.3	20418.7	10114.9	10303.8				2068	29224.8	22685.8	11000.6	11685.2
2069	29688	22395.9	10925.3	11470.6				2069	28290.7	21557.2	10977.9	10579.3				2069	31180.9	23842.8	11163.6	12679.2						2069	29797.1	22686.2	11028.9	11657.3				2069	28954.9	22075.3	11200.8	10874.5				2069	31182.4	24030.9	11051.5	12979.3
2070	27997.1	21399.5	10491.3	10908.2				2070	24763	18918	10063.2	8854.84				2070	33324	25549.2	11437.6	14111.6						2070	28031.4	21465.2	10692.3	10772.9				2070	25325.8	19395.8	10219.1	9176.72				2070	32777.3	25127.7	11253.1	13874.6
2071	27062.9	20539.5	10218.5	10321				2071	26582.3	20249.3	10243.5	10005.8				2071	30867.8	23871.8	11268.6	12603.2						2071	25877.4	19727.1	9759.91	9967.19				2071	27430.5	20995.7	10497.4	10498.3				2071	30802.4	23602.9	11136.9	12466
2072	27137.8	20599.3	10287.9	10311.4				2072	27708.8	21159.8	10451	10708.8				2072	30394.9	23598.7	11527.1	12071.5						2072	25945.2	19750.1	10180.9	9569.22				2072	28510.9	21725.1	10631.9	11093.2				2072	30100.5	23308.4	11370.3	11938.1
2073	27466.9	20845.6	10515.8	10329.8				2073	28981.3	22344.6	11583.5	10761.1				2073	30882.7	23725.6	10380.6	13344.9						2073	27198.9	20838.9	10226.8	10612.1				2073	27695.3	21431.2	11176.2	10255				2073	30177.3	23122.6	10163.1	12959.5
2074	24278.8	18582.8	9951.32	8631.5				2074	24958	19181.8	10160.9	9020.89				2074	31010.5	23595.1	11265.1	12330						2074	23150.3	17848.9	9207.79	8641.15				2074	25224.7	19358.3	10102.8	9255.51				2074	30369.5	22901.1	10948	11953.1
2075	29850.4	23083.9	10920.4	12163.5				2075	24146.7	18439.5	9700.34	8739.2				2075	34662.7	26670	12294.5	14375.5						2075	29556	22733.8	10650.3	12083.5				2075	23974.8	18384.6	9686.76	8697.89				2075	33702.4	25952.4	12179.9	13772.5
2076	28468.9	21487.4	10168	11319.4				2076	24525.9	18694.2	9687.06	9007.15				2076	31060.8	23454.9	11198.5	12256.4						2076	27692.9	20906.5	9979.3	10927.2				2076	24116	18405.2	9541.35	8863.86				2076	29925.3	22775.4	11151.1	11624.3
2077	28694.9	21842.7	10579.4	11263.3				2077	27054.8	20825.5	10668.1	10157.4				2077	33194.4	25302.4	11416.8	13885.7						2077	29173.8	22268.9	10855.8	11413.1				2077	26093.1	19960.3	10500.8	9459.5				2077	30338.5	23368.7	10555.9	12812.7
2078	25652.2	19534.1	10013.7	9520.37				2078	28073.4	21565.3	10767.7	10797.6				2078	32862.4	25264.1	11959.3	13304.8						2078	25248.3	19334.5	9936.64	9397.82				2078	28556.2	22065.5	10854.5	11211				2078	31862.9	24404.3	11512.3	12892
2079	23736.3	18163.4	9656.06	8507.32				2079	26661	20294.2	10193.3	10100.9				2079	29077.7	22009.6	10879.9	11129.7						2079	24427.5	18773.9	9763.58	9010.36				2079	26800.6	20717.9	10130.7	10587.3				2079	29587.9	22478.4	11177	11301.4
2080	26340.5	20205.9	10080.9	10125				2080	26304.3	20275.7	10491.1	9784.56				2080	34091.8	26269.7	12459.3	13810.4						2080	27131.5	20853.4	10545.7	10307.7				2080	27153.7	21051.2	10493	10558.2				2080	33511.3	25771	12214.7	13556.3
2081	28254.6	21377.4	10371.7	11005.7				2081	25464.8	19329.3	10008.5	9320.79				2081	33420.1	25544.4	12956	12588.4						2081	27788.4	21097.3	10192.7	10904.6				2081	25521.2	19357.9	9837.69	9520.17				2081	33534.6	25808.6	12770.9	13037.7
2082	25943.3	19702.5	9929.87	9772.6				2082	26922.5	20633.4	10329.6	10303.8				2082	29997.2	23270.5	11421.3	11849.2						2082	24975	18972.5	9563.06	9409.46				2082	26702.9	20589.1	9973.91	10615.2				2082	29122.1	22575.9	11269.2	11306.7
2083	28106.2	21298.4	10605	10693.5				2083	24775.9	18935.9	9651.62	9284.25				2083	33608.8	25923.6	11977.2	13946.4						2083	27345	20808.6	10423.7	10384.8				2083	25055.5	19120.5	9718.33	9402.16				2083	33709.6	25866.6	11420	14446.6
2084	26764.8	20324.2	10342.9	9981.31				2084	23026.7	17479.6	7574.31	9905.34				2084	32093	24599.5	11537.4	13062.2						2084	27267.6	20727.3	10420.5	10306.8				2084	23602.6	17948.8	8154.25	9794.55				2084	31342.2	24083.7	11199	12884.7
2085	24738.7	18944.9	9664.53	9280.41				2085	28418.3	21586.7	10641.8	10944.9				2085	32824	25303.8	11422.1	13881.7						2085	24707	18836.7	9716.05	9120.65				2085	27429.5	20748.5	10096.6	10651.9				2085	31164.9	23988.7	11219.2	12769.5
2086	26807	20405.9	10076.4	10329.5				2086	25699	19634.1	10191.6	9442.42				2086	33569.6	25869.9	12387.1	13482.7						2086	26709.6	20374.9	9803.93	10570.9				2086	26777.4	20502.3	10617	9885.31				2086	32228.2	24831.6	11892.3	12939.4
2087	25586.3	19412.1	9703.65	9708.49				2087	22910	17341.4	8889.99	8451.39				2087	32098.6	24575.8	12570.1	12005.7						2087	26426	20203.4	10143.8	10059.6				2087	23059.6	17594.5	8822.26	8772.23				2087	31380.6	24052.7	12267.2	11785.5
2088	25493.2	19456.9	9844.87	9612.04				2088	26191.8	20269.2	11042.9	9226.32				2088	32205.7	24292.8	12001.9	12290.9						2088	25346.4	19395.2	10033.5	9361.68				2088	27150.6	20988.4	11171.8	9816.53				2088	31543.9	24090.5	11836.9	12253.5
2089	26059.8	19828.6	9765.71	10062.9				2089	24202.1	18411.8	10068.9	8342.88				2089	26734.2	20558	10843.2	9714.8						2089	26906.5	20436.9	10206.6	10230.3				2089	24205.6	18610.3	9923.15	8687.11				2089	27229.2	20865.8	10768.4	10097.5
2090	26827.4	20695.3	11154.5	9540.76				2090	25394.9	19359.5	9776.58	9582.91				2090	27256.5	20521.8	10407	10114.7						2090	26728.1	20514.9	11211.5	9303.45				2090	26191.3	19973.6	10205.3	9768.21				2090	29254.1	21949.9	10525.2	11424.8
2091	28840.6	21941.2	11103.5	10837.7				2091	21280.6	16325.8	8462.84	7863				2091	29857.2	22557.7	8156.22	14401.5						2091	27843.2	21174.2	10832	10342.3				2091	21372.8	16429.1	8667.93	7761.21				2091	29209.4	22270.7	8420.88	13849.9
2092	26786.9	20613.3	10841.3	9772				2092	26951.9	20594.9	10508.9	10086.1				2092	25886.9	19467.1	8478.67	10988.5						2092	26544.2	20340.7	10544.4	9796.28				2092	26778.7	20403.2	10051.1	10352.1				2092	26857.2	20080	9444.89	10635.1
2093	26638.4	20332.1	9869.18	10462.9				2093	24485.6	18768.3	10038.6	8729.71				2093	28601.9	21884.6	11304.8	10579.9						2093	27355.8	20921	10018.1	10902.9				2093	24621.9	19212	10002	9209.96				2093	29381.6	22495.3	11388.7	11106.6
2094	27316.3	20796.9	10602.6	10194.3				2094	26381.3	20173.1	10560.6	9612.5				2094	35358	27007.2	11919.4	15087.7						2094	27915.5	21347	10937.7	10409.3				2094	28229.9	21548.3	11026.1	10522.2				2094	34824.1	26717.6	12201.3	14516.3
2095	25639.2	19405.1	10344.4	9060.69				2095	23966	18374.5	9737.94	8636.53				2095	33298	25906.9	12457.3	13449.6						2095	25119	19257.4	10044.1	9213.23				2095	23476.4	17945	9286.18	8658.8				2095	32279.8	25048.6	11984.6	13064
2096	31192.8	23812.8	12108.4	11704.4				2096	27520.2	20985.8	10903.1	10082.8				2096	34002	25801.7	12138.8	13662.8						2096	30592.5	23417.2	11772.8	11644.4				2096	28246.8	21604.2	10989.1	10615.1				2096	32296.8	24355.1	11570.5	12784.6
2097	26921.9	20486	10231.1	10254.9				2097	28075.7	21738.9	11674.9	10063.9				2097	31949.7	24414.5	10946.1	13468.5						2097	27734.4	21101.6	10747.7	10353.9				2097	27972.9	21615.2	11690.6	9924.6				2097	31194.8	23797.5	10720.2	13077.3
2098	27167.4	20787.7	10539.5	10248.3				2098	25612	19619.2	10378.5	9240.7				2098	33165.9	25280.6	12417.1	12863.5						2098	26995.5	20685.4	10549.2	10136.2				2098	26086.2	20109.8	10707.1	9402.71				2098	32445.1	24808.3	12427.1	12381.2
2099	25654.6	19550.7	9972.23	9578.44				2099	26036.2	19935.5	10232.5	9702.97				2099	29451.6	22232.9	10595.7	11637.2						2099	24678.3	18824.2	9402.28	9421.88				2099	26389.1	20271.3	10544.2	9727.19				2099	28634.3	21641.1	10547.4	11093.7
2100	28949.6	21947.2	11048.5	10898.7				2100	26234.7	19928.3	10263.8	9664.5				2100	32961.7	24944	12371.5	12572.5						2100	28706.1	21933.7	11356.1	10577.6				2100	27166.8	20596.1	10279.5	10316.6				2100	32847.2	24892.3	12312.4	12579.9

## Sheet: RCP 8.5
Zhongwei station																										Yongning station
MIROC5								IPSL-CM5A-MR								GFDL-ESM2G										MIROC5								IPSL-CM5A-MR								GFDL-ESM2G
Year	Photosynthetic production (kg/ha)	Aboveground biomass (kg/ha)	ear (kg/ha)	leaf+stem (kg/ha)				Year	Photosynthetic production (kg/ha)	Aboveground biomass (kg/ha)	ear (kg/ha)	leaf+stem (kg/ha)				Year	Photosynthetic production (kg/ha)	Aboveground biomass (kg/ha)	ear (kg/ha)	leaf+stem (kg/ha)						Year	Photosynthetic production (kg/ha)	Aboveground biomass (kg/ha)	ear (kg/ha)	leaf+stem (kg/ha)				Year	Photosynthetic production (kg/ha)	Aboveground biomass (kg/ha)	ear (kg/ha)	leaf+stem (kg/ha)				Year	Photosynthetic production (kg/ha)	Aboveground biomass (kg/ha)	ear (kg/ha)	leaf+stem (kg/ha)
2006	31144.2	23952.3	10202.7	13749.6				2006	30064.5	23085.1	10492.8	12592.3				2006	31197.8	24019.7	10134.8	13884.8						2006	30276.7	23361.2	10185	13176.2				2006	28812.9	22247.1	10404.1	11843.1				2006	29493.5	22741.9	10088.4	12653.6
2007	31230.3	24017.5	11286.5	12731				2007	28443	21734.6	10664.7	11069.9				2007	29807.4	23106.8	10427.4	12679.4						2007	29942.5	23082.7	10888.3	12194.4				2007	28370.7	21767.3	10394.1	11373.2				2007	29042.8	22436.1	10572.8	11863.4
2008	30188.2	23189.8	10245.8	12943.9				2008	28180.7	21703.6	10602.9	11100.7				2008	30366.1	23384.7	10361.3	13023.4						2008	28858.4	22106.1	10079.5	12026.5				2008	26522.1	20427.1	9760.5	10666.6				2008	30550.5	23475.8	10097.4	13378.4
2009	27553.7	21089.3	9488	11601.3				2009	31568	24280.7	11124.6	13156.1				2009	30187.9	23255.8	10505.2	12750.6						2009	25936	19745.5	9098.68	10646.8				2009	30292.6	23473.4	10827.4	12646				2009	29940	23036.3	10255.9	12780.5
2010	29951.5	23169.2	10684.4	12484.8				2010	28291.9	21559.4	10395.7	11163.7				2010	29924.1	22855.3	10210.6	12644.7						2010	28321.5	21855.1	10021.2	11833.8				2010	27432.8	21087	9937.26	11149.8				2010	27935.5	21481.8	9803.74	11678.1
2011	27712.6	21293.1	9608.63	11684.4				2011	33927.3	25958.6	11189.8	14768.9				2011	26835.1	20586.8	10360.6	10226.2						2011	26368.4	20297.7	9194.05	11103.7				2011	30790.8	23715.2	11157.6	12557.6				2011	27011.1	20697.9	10291.1	10406.8
2012	29063.8	22426.5	10548.2	11878.3				2012	31732.7	24273.7	10675.9	13597.8				2012	27305.1	20615.4	9682.39	10933						2012	27827.6	21372.8	10105.6	11267.2				2012	31000.5	23699.7	10408.5	13291.3				2012	27025.3	20371.1	9584.43	10786.7
2013	30375.6	23258.7	10430.8	12827.9				2013	27845.5	21415.4	10154.7	11260.7				2013	28181.5	21548.7	10213.4	11335.3						2013	29546.4	22669.3	10147.2	12522				2013	27159	20928.6	9979.77	10948.9				2013	27425.8	21272	10006.3	11265.7
2014	28712.2	22065	9963.57	12101.4				2014	29103.4	22273.9	10267.4	12006.5				2014	28320.3	21862.2	10485.3	11376.9						2014	27376.6	20859.8	9396.74	11463				2014	27999.6	21602	10229	11373				2014	27015.5	20759.8	10014.8	10745
2015	27985.2	21456.8	9989.43	11467.4				2015	26337.6	20035.1	9333.59	10701.5				2015	30531	23390.4	10277.9	13112.5						2015	26777.6	20572.8	9522.39	11050.5				2015	25414.9	19537.1	9274.51	10262.5				2015	28901	22216.2	10219.1	11997.2
2016	29429.1	22691	10715.7	11975.3				2016	28539.2	22018.8	10152.7	11866.1				2016	26878	20732.5	9634.56	11097.9						2016	28745.9	22201.9	10688.9	11513				2016	26676.6	20239.3	9849.77	10389.6				2016	26876.9	20643.2	9790.82	10852.4
2017	28897.5	22523.8	10641.4	11882.4				2017	28376.6	21929.7	10845.8	11084				2017	31365.6	24051.5	11153.4	12898.1						2017	28738.7	22344.9	10733.2	11611.7				2017	27028.2	20748	10020.6	10727.3				2017	30549.5	23383.8	10773.3	12610.5
2018	29740.7	23128.1	10611.9	12516.2				2018	29089.8	22611.1	10772.4	11838.8				2018	32173.3	24629.4	10424.9	14204.4						2018	27878	21722.8	10267.5	11455.2				2018	28849.1	22211.1	10970.3	11240.8				2018	30459.2	23307.6	10337.6	12970
2019	29277	22355.7	10190.4	12165.3				2019	25907.6	19688.9	9464.83	10224.1				2019	32536.2	25126.1	10732.2	14393.9						2019	27432	20897.7	9867.45	11030.3				2019	24611.8	18603.3	9259.77	9343.5				2019	31524.7	24352.1	10825.9	13526.2
2020	27682.2	21270.8	10800.7	10470.1				2020	25766.1	19827.8	9824.43	10003.4				2020	28879.9	22101.7	10643.2	11458.5						2020	27457.6	21100.5	10869.5	10231				2020	25327.1	19278.3	9604.58	9673.75				2020	27690.9	21007	10808	10199
2021	28434.4	21863.2	10255.6	11607.6				2021	26007.9	19746.7	9746.79	9999.95				2021	29205.5	22483	10629.6	11853.4						2021	27551	21222.9	10008.5	11214.4				2021	24756	18776.2	9328.57	9447.64				2021	28139.9	21669.3	10208.8	11460.5
2022	26921.8	20419.9	9572.82	10847.1				2022	30050.5	23240.6	10713.5	12527.2				2022	33728	26322.7	11921.9	14400.8						2022	25895.4	19706.9	9438.07	10268.8				2022	29021.6	22466.6	10592.3	11874.3				2022	31570.9	24584.6	11159.5	13425.1
2023	26918.3	20496.7	9926.74	10570				2023	28418.7	21946.8	10631.1	11315.7				2023	31132.8	24124.3	11244.3	12880						2023	26934.6	20638.4	9828.04	10810.3				2023	25493.5	19564.9	9369.84	10195				2023	29328.6	22865	10844.1	12020.9
2024	28058.8	21588.1	10578.5	11009.6				2024	30315.8	23502.5	11515.1	11987.4				2024	34309.4	26406.3	11191.3	15215						2024	27413.7	20981.6	10340.4	10641.2				2024	28993.9	22541.7	11140.9	11400.9				2024	31106.8	23886.5	10435.2	13451.3
2025	27284.4	20833.9	9557.42	11276.5				2025	27516.3	20951.1	10688.7	10262.4				2025	31039.5	24058.8	10854.4	13204.3						2025	26800.6	20250.2	9562.19	10688				2025	27446.8	20869.4	10593.7	10275.7				2025	29662.8	22864.6	10555.3	12309.3
2026	26010.3	19977	9255.88	10721.1				2026	25240.1	19068.9	9575.49	9493.43				2026	31423.9	24216.6	10746.2	13470.4						2026	25748.7	19568.9	9329.55	10239.3				2026	23843.8	18171	9365.97	8805.06				2026	30076.5	23143.3	10236.1	12907.2
2027	28263.3	21834.6	10343.1	11491.4				2027	30587.1	23473.2	10699.1	12774.1				2027	32395	24732.8	10343	14389.9						2027	27680.5	21337.7	9919.53	11418.1				2027	28935.6	22163.9	9859.61	12304.3				2027	30052.3	22930.4	10393.2	12537.2
2028	27836.1	21106	10289	10817.1				2028	28599.4	22219.1	10612.6	11606.5				2028	29987	23153.5	11213.1	11940.4						2028	26699.8	20146.1	10075.2	10070.9				2028	27100.4	21026.9	10227.8	10799.1				2028	27425.7	21271.7	10410.7	10861
2029	27071.6	20861.2	9740.48	11120.7				2029	28059.1	21717.7	10781.5	10936.2				2029	31012.3	23752.1	10859.6	12892.5						2029	27006.8	20718.3	10180.1	10538.2				2029	27120.3	20983.5	10065.6	10917.9				2029	29150.7	22451	10974.5	11476.5
2030	28793	21933.3	10525.9	11407.5				2030	30687.5	23684.5	11138.9	12545.6				2030	29642	22862.8	10742.9	12119.9						2030	27234.4	20897.8	10126.3	10771.5				2030	29721.2	23003.3	10416.1	12587.3				2030	28268.4	21537	10403.4	11133.6
2031	29239.4	22337.2	10023.3	12313.8				2031	30344.4	23211.9	10069.5	13142.4				2031	31050	23662.4	11470.6	12191.8						2031	29560.6	22650.7	10294.6	12356.1				2031	28056.7	21456	9944.26	11511.8				2031	28868.4	21994.9	10812.8	11182.1
2032	28159.2	21629.3	10764	10865.3				2032	26369.2	20093.9	9921.29	10172.7				2032	29854.6	22923.1	11023.4	11899.7						2032	27147.7	20709.5	10377.7	10331.7				2032	24507.6	18711.8	9233.22	9478.59				2032	29827.7	23011.1	11061.5	11949.6
2033	27641.5	21041.6	10255.4	10786.1				2033	28919.7	22144.8	10893.3	11251.5				2033	29873.2	22962.8	10384.6	12578.3						2033	26660.6	20237.7	10333.7	9904.02				2033	26863.7	20510.6	10448.4	10062.2				2033	28815.3	22161.8	10202.7	11959.1
2034	28402.4	21922.4	10478.9	11443.5				2034	28946.5	22033.9	9989.97	12044				2034	32712.6	25222.7	12115.9	13106.7						2034	27608.4	21280.9	10305.7	10975.2				2034	28071.4	21414.6	9931.79	11482.8				2034	29699.6	22576.4	11250.1	11326.3
2035	26132.1	19634	9292.9	10341.1				2035	26684	20300.8	9849.4	10451.4				2035	32780.4	25264.3	11319.9	13944.4						2035	24921.4	18687.2	9130.6	9556.57				2035	24736	18890.6	8821.65	10068.9				2035	31095.2	23964.7	10947.8	13016.9
2036	30229.4	23261.8	11096.4	12165.5				2036	29371.1	22757.8	10623.3	12134.5				2036	31119.3	24132.1	11537.3	12594.9						2036	30047	23123.4	11180.7	11942.7				2036	28541.2	22052.4	10775.3	11277.1				2036	29298	22601	10603.6	11997.4
2037	30140.4	23019.7	10895.8	12123.8				2037	30278.2	23421.4	10828.2	12593.1				2037	31794.3	24377.3	11514.5	12862.8						2037	29485.8	22760.1	10539.9	12220.2				2037	28679.9	21902	10329.9	11572.2				2037	29594.5	22966.2	10945.9	12020.3
2038	28681.6	22364.8	10877.8	11487				2038	25353.7	19467.2	9991.79	9475.44				2038	33511.7	26015.8	11688.2	14327.6						2038	28281.7	22003.5	10662.2	11341.2				2038	25048.2	19235.8	10140.8	9095				2038	31879.7	24684.8	11553.6	13131.2
2039	25621.8	19366.2	8737.38	10628.9				2039	25486.8	19383.9	9767.09	9616.84				2039	30056.7	23036.8	10851.9	12184.9						2039	24552.7	18564.7	8498.44	10066.3				2039	24032.5	18323.4	9372.38	8951.01				2039	29144.8	22303.8	10610.3	11693.5
2040	26961.5	20425.3	9984.01	10441.3				2040	25270.5	19585.1	10166.6	9418.49				2040	33206.6	25693.5	12401.7	13291.8						2040	25510.6	19367.3	9524.57	9842.72				2040	24175.5	18598.9	9906.66	8692.22				2040	31318.1	23893	11614.5	12278.5
2041	28174.3	21523.3	10419.3	11104				2041	27157.4	20796.3	9965.87	10830.4				2041	31954.2	24793	11731.9	13061.1						2041	29133.9	22268.8	10619.4	11649.4				2041	26342	19969.6	9836.4	10133.2				2041	30527	23725.6	11667.8	12057.8
2042	26067	19949.3	10175.1	9774.14				2042	28150.3	21386.8	10396.4	10990.4				2042	34344	26446.8	12255.3	14191.5						2042	25963.2	20049.3	10448.2	9601.09				2042	28368.4	21458.4	10480.2	10978.3				2042	32971.8	25415.2	12238.9	13176.2
2043	26561.3	20358.4	9972	10386.4				2043	27409.4	21054	10538.8	10515.2				2043	32321.7	24669.1	12360.3	12308.9						2043	25758.6	19694	9908.34	9785.65				2043	27952.5	21387	10784.4	10602.6				2043	30843.6	23584.6	11630.5	11954.1
2044	24188.9	18582	9777.36	8804.61				2044	26311.4	20031.4	9795.41	10236				2044	30179.2	22809.6	10906.8	11902.8						2044	23685.6	18212.7	9216.95	8995.73				2044	25479.7	19547.6	9616.52	9931.03				2044	28278.4	21564.4	10532.9	11031.6
2045	25964.6	19691.2	9701.91	9989.25				2045	28432.7	21987.7	11614.6	10373.1				2045	30534.1	23219.3	11219.4	11999.8						2045	25786.7	19604.6	9971.54	9633.07				2045	29914.2	23054.8	12164.7	10890.1				2045	28337.1	21481	10416.7	11064.3
2046	26364	20096.2	10134.6	9961.58				2046	24654.8	18695.6	9341.67	9353.98				2046	28964	21978.4	10519	11459.3						2046	25034.7	19510	9820.34	9689.65				2046	24328.2	18391.3	8964.63	9426.62				2046	27247.1	21125.9	10214.1	10911.8
2047	27116.5	20686.1	10922.8	9763.3				2047	25956.7	19685	9762.35	9922.66				2047	30890.4	23519.9	11307.1	12212.9						2047	27147.5	20862.3	10812.8	10049.4				2047	24564.4	18679	8845.42	9833.57				2047	31402.1	24089	11191.8	12897.1
2048	27437.4	20849.6	10578.8	10270.8				2048	25432.8	19549.5	9629.93	9919.6				2048	30112.8	23107.9	11185.5	11922.4						2048	26448.8	19892.7	9849.69	10043				2048	25670.5	19576.8	9792.08	9784.72				2048	29548.3	22668.8	11058.2	11610.7
2049	27579.8	20981.5	10208.8	10772.6				2049	26499.5	20076.1	9772.51	10303.6				2049	30140.9	22880.5	11524.3	11356.2						2049	28471	21669.4	10535.9	11133.5				2049	25840.8	19664	9767.07	9896.93				2049	29101.8	22155.3	11032.7	11122.6
2050	28045.5	21344.1	10828.1	10516				2050	27760	21070.5	10254.3	10816.3				2050	30156	23157.1	10952.9	12204.2						2050	27353.8	20805.2	10352.3	10452.9				2050	25747.5	19866.8	9550.01	10316.8				2050	28808.5	21955.7	10637.4	11318.3
2051	27403.5	20987	10517.5	10469.5				2051	25027.7	19055.2	10077.3	8977.89				2051	31919.5	24928.3	12360.1	12568.2						2051	27849.9	21334.7	10659.2	10675.5				2051	24746.7	18930.2	9908.2	9022.01				2051	30857.9	23615.6	11884.4	11731.3
2052	28484.8	21739.4	10550.1	11189.3				2052	29999.6	22958.3	11035.7	11922.6				2052	29483.8	22929.1	11782.7	11146.4						2052	27394	20928.5	10406.2	10522.3				2052	29659.7	22812.9	10956.9	11856.1				2052	29890.9	23261.3	11649.5	11611.8
2053	27578.7	20982.7	10146.9	10835.9				2053	25905.8	19734.4	10454.1	9280.38				2053	31697	24476.4	12020.3	12456.1						2053	26519	20226.7	10127.7	10099				2053	25343.4	19435.5	9910.26	9525.21				2053	30358.3	23349.3	11140.6	12208.7
2054	26034.4	19752	10092.9	9659.13				2054	24420.3	18538.1	9775.31	8762.81				2054	30299.1	23045.8	11316.3	11729.5						2054	26202.8	19916.8	10148.4	9768.37				2054	24141.6	18440.6	9787.53	8653.07				2054	30242.9	23378.5	11294.1	12084.4
2055	26165.5	19996.8	10015.1	9981.64				2055	25880.8	19584.7	10392.2	9192.53				2055	31237	24068	11155	12913						2055	26755.2	20434.6	9964.23	10470.3				2055	24305.6	18533.6	9882.93	8650.68				2055	30058.2	22956.6	10688.5	12268.1
2056	25750.8	19632.1	10070.9	9561.19				2056	23453	17682.9	7562.74	10120.1				2056	29997.9	23078.6	11676.1	11402.5						2056	25173.3	19210.3	9966.06	9244.26				2056	23623.2	18014.4	7863.68	10150.7				2056	29581.2	22559.9	11174.3	11385.5
2057	26468.9	20223	10285.6	9937.4				2057	24106.8	18434.5	7586.92	10847.6				2057	34341.7	26437.8	12004.8	14433						2057	26110.2	20152.9	10265.6	9887.3				2057	24807.2	19140.3	10112.2	9028.05				2057	32089	24721.6	11693.2	13028.4
2058	27287.9	20828.3	10186.5	10641.8				2058	26881.9	20595.2	10798	9797.16				2058	33554.5	25627	12470.6	13156.4						2058	27471.3	20916.4	10351.3	10565				2058	25803	19897.6	10324.6	9572.91				2058	29722.5	22660.8	11075.2	11585.6
2059	25736.7	19652.9	9780.91	9872.02				2059	27903	21124.6	10304.5	10820.1				2059	34163.9	26282.3	12213.8	14068.5						2059	26421.9	20159.7	9813.36	10346.3				2059	27454.3	20770.5	10305.8	10464.7				2059	32157	24808.1	11573	13235.1
2060	26376.9	20070.7	10216	9854.73				2060	26209.7	19977.8	10469	9508.77				2060	29170	22265.6	11210.1	11055.5						2060	26296.4	20007	10131.3	9875.66				2060	27111.7	20692.9	10636.5	10056.4				2060	28119.5	21561.2	11243.5	10317.7
2061	26827.1	20386.6	10247.6	10139				2061	24556.7	18903.3	9971.16	8932.11				2061	30322.4	23483.7	11059.6	12424.1						2061	25952	19771.6	9793.09	9978.54				2061	23273.6	17975.9	9289.82	8686.07				2061	29465.6	22866.9	11144.8	11722.1
2062	26458.9	20122.1	9706.44	10415.6				2062	25481.2	19544.2	10602.7	8941.54				2062	34064.7	26351.8	12562.6	13789.2						2062	26619.3	20217.3	9911.04	10306.2				2062	24992.7	19351.3	10509.9	8841.32				2062	33194.1	25568.1	12304.4	13263.7
2063	25997.7	19875.2	9777.98	10097.3				2063	27284.4	21094.1	10999.4	10094.7				2063	30750.9	23914.9	11819.7	12095.2						2063	26484.6	20296.4	10269	10027.4				2063	27221.2	21224.3	10986.6	10237.7				2063	29132.4	22603.9	11234	11370
2064	25600.5	19474.4	10207.9	9266.51				2064	22820.8	17838.4	9220.63	8617.74				2064	32023.1	24355.4	12479.5	11875.9						2064	24611.4	19034.5	10012.5	9022				2064	24414.5	18848.9	9709.73	9139.15				2064	30682.8	23377.6	11849.3	11528.4
2065	27550.2	20925.5	10036.6	10888.9				2065	23497.7	17879.5	7259.37	10620.2				2065	32751.2	24882.5	12086.8	12795.7						2065	27914.8	21320.6	9866.93	11453.7				2065	23486.2	17966.8	9261.43	8705.34				2065	32346.9	24689.2	12076.6	12612.6
2066	24631.1	18890.6	9935.71	8954.93				2066	23782.9	18279.2	9717.62	8561.63				2066	29326.4	22339	11146.3	11192.6						2066	24633.6	18931.9	9983.66	8948.24				2066	24629.7	18849.9	9622.79	9227.08				2066	29453.7	22365.6	11292.7	11072.9
2067	28270.2	21628.5	11170.6	10458				2067	27012.3	20582.3	10609.1	9973.17				2067	32633.6	24792.9	12162.2	12630.7						2067	28638.6	21957.5	11135.5	10822				2067	26855.3	20457.9	10652.4	9805.5				2067	32054.6	24211.8	12014.5	12197.3
2068	27838.6	21516.2	11124.6	10391.6				2068	22612.7	17360.2	9220.96	8139.2				2068	29903.4	22677.9	11122.3	11555.6						2068	28523.1	22047.9	11554.9	10493				2068	22655.2	17403.6	9451.12	7952.49				2068	27866.7	21131.5	9904.29	11227.2
2069	28044.1	21486.1	10969.9	10516.2				2069	26034	20158.2	10352.6	9805.56				2069	31277.1	23818.2	12127.3	11690.9						2069	28609.8	21857.9	11134.5	10723.4				2069	25452.7	19649.3	9927.26	9722.07				2069	30489.3	23256.7	11990.8	11265.9
2070	26943.7	20472.1	10681.5	9790.61				2070	21850	16614.6	5965.64	10648.9				2070	34181.2	26006.3	12353.7	13652.6						2070	25949.2	19709.2	9963.32	9745.9				2070	22303	17001.2	6910.01	10091.2				2070	33278.7	25350.6	12426.3	12924.3
2071	26090.6	19930.9	10495	9435.9				2071	23034.3	17593.4	8079.28	9514.09				2071	32504.4	25224.1	12007.6	13216.5						2071	25122.2	19220.5	10218.7	9001.82				2071	23279.8	17785.7	9031.66	8754				2071	30948.7	23939.5	11564.7	12374.8
2072	25463.6	19318.1	10157.6	9160.52				2072	26509.1	20064.4	10606.5	9457.92				2072	30366.6	23271.6	11758.4	11513.2						2072	25258.8	19260.8	10063.2	9197.59				2072	25968	19627.2	10555.6	9071.58				2072	30986.5	23868	12084.7	11783.3
2073	26028.2	19900.7	9684.43	10216.3				2073	25541.2	19595.7	10203.6	9392.08				2073	31601.9	24503.6	12173.9	12329.7						2073	27177.9	20709.2	10096.7	10612.5				2073	26500.5	20295.4	10366.2	9929.19				2073	30491.3	23336.1	11520.7	11815.3
2074	25562.4	19595.1	9806.39	9788.75				2074	24368.7	18744.6	9879.06	8865.57				2074	35573	27214	12983	14231						2074	26419.4	20310.5	9946.11	10364.4				2074	24669.8	18938.7	9845.45	9093.27				2074	34005.9	26235.8	12516.7	13719.1
2075	24756.5	19055.1	10044.5	9010.66				2075	24112.7	18764.3	9773.93	8990.4				2075	32247.3	24571.8	11900.8	12670.9						2075	25101.7	19293.6	10108.4	9185.11				2075	23579.5	18181.4	9248.58	8932.78				2075	30752.1	23542.9	11594.7	11948.2
2076	24074.1	18364.6	9171.64	9192.99				2076	23738.6	18465.5	9559.86	8905.66				2076	31201.6	23887.6	12574.9	11312.6						2076	24449	18531.6	9025.06	9506.54				2076	23952.6	18564.6	9676.56	8888.07				2076	30544.9	23343.7	12392.1	10951.6
2077	27438.7	21195.8	11099.5	10096.3				2077	21431.2	16077.7	4196.48	11881.2				2077	34352.8	26319.3	13069.4	13249.8						2077	28604.7	22396.6	11557.9	10838.7				2077	19922.2	14963.5	3968.21	10995.2				2077	34499.9	26307	12801.5	13505.5
2078	25869.2	19850.5	10600.3	9250.2				2078	22985.4	17760.1	9719.36	8040.69				2078	34334.3	26233.5	12482.1	13751.4						2078	25809.9	19861.5	10657.2	9204.33				2078	23858.8	18501.7	9928.73	8573				2078	32999.1	25015.6	12784.6	12231
2079	24124.6	18546.9	9632.85	8914.09				2079	22725.2	17678.3	8883.41	8794.84				2079	33544	25600.7	12239.2	13361.5						2079	24762	19042.9	9952.98	9089.97				2079	21663.9	16822.4	8178.02	8644.41				2079	31379.5	24004.4	11437.3	12567.1
2080	27083.6	20799.9	10992.1	9807.74				2080	21287.1	16250.4	6603.67	9646.74				2080	33736.3	25320.1	12969	12351.2						2080	26316.1	20287.8	10563	9724.86				2080	21799.3	16614.6	7285.2	9329.44				2080	32075.1	24327.6	12220.2	12107.4
2081	27046.5	20843.6	10616.4	10227.2				2081	24719.5	18850.8	8032.01	10818.8				2081	33241.7	25327.8	12759.8	12567.9						2081	27522.2	21030.2	10953.3	10076.9				2081	25589.3	19581.2	9746.81	9834.35				2081	33052.1	25409.9	12308.8	13101.1
2082	26130.2	19929.9	10602.3	9327.55				2082	25267.8	19259.7	8699.41	10560.2				2082	28327	21783.8	11011.5	10772.3						2082	26595.3	20343.3	10411.3	9931.98				2082	24846.2	18930.5	9909.35	9021.13				2082	27986.2	21505.4	10921.9	10583.5
2083	25832.9	19709.9	10179.6	9530.22				2083	23451.3	17864.1	8389.17	9474.93				2083	30962.1	23691.5	12053.7	11637.8						2083	25385	19306.7	10103.1	9203.61				2083	22388.4	17049.9	8619.07	8430.84				2083	29452.4	22457.7	11605.5	10852.2
2084	30130.6	22876.2	11070.8	11805.3				2084	24283.3	18740.3	9940.77	8799.57				2084	31563.1	23845.7	11825.9	12019.8						2084	30173	22971.2	10946.4	12024.9				2084	24654.6	19057.9	10095.6	8962.27				2084	29656.9	22574.4	11469.1	11105.4
2085	27324.9	20912.4	10523.8	10388.6				2085	25737.4	19705.7	10377	9328.71				2085	27145.7	20550.1	9356.33	11193.7						2085	28838.8	22063	11085.1	10977.9				2085	25508.3	19425.2	10032.7	9392.54				2085	28769.4	21873.9	11058.4	10815.5
2086	26776.2	20416.8	9287.46	11129.4				2086	24876.1	19180.9	10520.5	8660.38				2086	29703.4	22681.5	11738.8	10942.7						2086	26837.8	20551.8	11087.8	9464.01				2086	24656.3	19129	10146	8983.02				2086	29223.9	22503.7	11564.4	10939.3
2087	26294.7	20061.4	10531.8	9529.64				2087	22198.2	17369.5	9237.19	8132.33				2087	31316.7	23627.6	11896.8	11730.8						2087	27377.2	20914	10722.1	10192				2087	21227.8	16472.5	8880.21	7592.31				2087	30478.6	23096.3	10709.4	12386.9
2088	30271.2	23190.8	11697.5	11493.3				2088	18187.7	13806.3	3868.69	9937.65				2088	30219.2	23088.3	11842.2	11246.2						2088	31061.2	23704.6	11792.5	11912.2				2088	19885.7	15134.7	5665.88	9468.86				2088	29280.1	22384.9	11248.3	11136.6
2089	27599.9	21271.8	11004.9	10266.8				2089	21917.9	17282.2	9534.18	7747.98				2089	34124.1	26063	12984.7	13078.3						2089	28358	21837.8	11366.2	10471.5				2089	21646.4	16753	9376.69	7376.26				2089	31812.2	24155.5	12520.6	11634.8
2090	25727.6	19424.4	9978.38	9446.05				2090	22204.4	17096.4	8363.75	8732.64				2090	28762.2	21831.7	10647.7	11184						2090	26643.5	20217.5	10290.7	9926.77				2090	23208.9	17961.3	9613.91	8347.41				2090	26943.1	20337.1	9813.01	10524.1
2091	27215.6	20826.9	11090	9736.95				2091	23318	17647.6	8508.85	9138.77				2091	34103.9	26223.6	13172	13051.6						2091	27558.9	21098.3	11187	9911.32				2091	21711	16516.3	8257.29	8259.02				2091	33093	25248.3	12749.4	12498.9
2092	29310	22309.2	11853.9	10455.3				2092	21150.5	16307.9	8372.47	7935.4				2092	30427.7	23158.7	10548.1	12610.6						2092	29435.2	22487.8	11585	10902.8				2092	21274	16480.7	7319.66	9160.99				2092	30267.2	22926.9	11561.1	11365.8
2093	29085.5	22243.6	11175.5	11068.2				2093	23690.6	18045.5	8135.19	9910.36				2093	32132.1	24715.4	13132	11583.5						2093	29916.5	22944.5	11583.8	11360.7				2093	23835	18140.3	8630.96	9509.37				2093	30078	23113.6	12094.1	11019.5
2094	28779.2	21875.4	11661.1	10214.3				2094	20565.4	16113.6	8854.12	7259.5				2094	31450.8	23993.1	12758.1	11235						2094	29092.7	22197.6	11605.2	10592.4				2094	20601.5	15973.5	8256.22	7717.25				2094	30367.8	23275.2	12122.1	11153.1
2095	23417.6	17924.6	9298.04	8626.56				2095	21347.1	16539.3	6555.36	9983.92				2095	31903	23913.8	10922.7	12991.1						2095	24761.9	19099.9	10124.7	8975.22				2095	22187.5	17124.7	8108.24	9016.46				2095	31031.5	23324	11929.3	11394.8
2096	27242.1	21086.1	10849.9	10236.2				2096	20809.7	16126.3	7161.55	8964.77				2096	31551.6	24122	11649.1	12472.9						2096	27527	21195.4	11205.1	9990.26				2096	23184.1	17879.2	9171.15	8708.09				2096	30732.6	23417.2	11909.1	11508.2
2097	24915.8	18892.3	8614.52	10277.8				2097	24217.6	18501	9654.77	8846.19				2097	32352.8	24648.5	12352.8	12295.7						2097	25583.8	19419.7	10241.7	9178.02				2097	23994.5	18655.1	8552.26	10102.8				2097	31111.2	23815.7	11924.2	11891.5
2098	26154.7	20083.6	10141.3	9942.33				2098	23656.8	18523	9848.87	8674.1				2098	33867	25908.6	12598.4	13310.2						2098	26602.7	20459	10378.6	10080.4				2098	24202.1	19015	9714.8	9300.18				2098	31968.4	24671.8	11826	12845.8
2099	25746.6	19516.6	10174.7	9341.9				2099	21063.1	16326.4	8992.68	7333.73				2099	28579.3	22006.6	11330.8	10675.8						2099	26814.9	20429.2	10713.3	9715.83				2099	21076.3	16415.2	8464.34	7950.91				2099	27606.1	21191.1	10840.9	10350.2
2100	26782.7	20490.3	10712.7	9777.54				2100	23339.1	18047.8	8190.33	9857.51				2100	26202.3	19943.6	9766.09	10177.5						2100	27536.8	21147.2	10995.5	10151.7				2100	24004.2	18527.1	8386.78	10140.3				2100	28319.4	21542.1	11097.5	10444.5
